# Supplementary material for: What transcriptomics and proteomics can tell us about a high borate perturbed boron tolerant Bacilli strain
Source: Royal Society of Chemistry journal article supplement (doi:10.1039/d3mo00023k), 2023-04-04
Supplement: d3mo00023k1.xlsx [file d3mo00023k1.xlsx]

## Sheet: PSM
Protein Discription	Present in Control Broth	Present in Test Broth	Protein Function	Protein Location Cytosolic/membrane
WP_010857015.1 MULTISPECIES: AbrB/MazE/SpoVT family DNA-binding domain-containing protein [Lysinibacillus]	+	+	regulation of gene expression	Cytosolic
WP_010860160.1 MULTISPECIES: 50S ribosomal protein L20 [Lysinibacillus]	+	+	It is important during the early stages of 50S assembly	Cytosolic
WP_012291831.1 MULTISPECIES: DNA replication/repair protein RecF [Lysinibacillus]	+	+	repair and recF protein function	Cytosolic
WP_012291837.1 MULTISPECIES: IMP dehydrogenase [Lysinibacillus]	+	+	maintaining balance between the adenine and guanine nucleotide	Membrane
WP_012291984.1 MULTISPECIES: proline dehydrogenase family protein [Lysinibacillus]	+	+	involved in the subpathway that synthesizes L-glutamate from L-proline, the pathway L-proline
WP_012292024.1 MULTISPECIES: DNA helicase PcrA [Lysinibacillus]	+	+	DNA helicase used for plasmid rolling-circle replication	Cytosolic
WP_012292187.1 MULTISPECIES: HIT family protein [Lysinibacillus]	+	+	entomotoxicity	Cytosolic
WP_012292276.1 MULTISPECIES: DNA cytosine methyltransferase [Lysinibacillus]	+	+	writing, maintaining, reading, and perhaps erasing DNA methylation.	Cytosolic
WP_012292313.1 MULTISPECIES: acyl-CoA dehydrogenase family protein [Lysinibacillus]	+	+	catalyze the initial step in each cycle of fatty acid β-oxidation in the mitochondria of cells	Cytosolic
WP_012292409.1 MULTISPECIES: DUF5808 domain-containing protein [Lysinibacillus]	+	+	lipolytic activities involved in multiple biological functions.	Cytosolic
WP_012292448.1 MULTISPECIES: GMC family oxidoreductase [Lysinibacillus]	+	+	flavin adenine dinucleotide binding	Cytosolic
WP_012292525.1 MULTISPECIES: HAMP domain-containing histidine kinase [Lysinibacillus]	+	+	signal transduction not only in histidine kinase but also in a number of other signal-transducing	Membrane
WP_012292644.1 MULTISPECIES: LuxR C-terminal-related transcriptional regulator [Lysinibacillus]	+	+	LuxR-type HTH regulators control a wide variety of activities in various biological processes.
WP_012292692.1 MULTISPECIES: bacillithiol biosynthesis deacetylase BshB2 [Lysinibacillus]	+	+	BSH in detoxification of electrophiles
WP_012292785.1 MULTISPECIES: flagellin [Lysinibacillus]	+	+	enables bacterial motility.	membrane
WP_012292914.1 MULTISPECIES: flagellar export chaperone FliS [Lysinibacillus]	+	+	facilitate the docking of their cognate filament-type substrates to the FlhAC
WP_012293201.1 MULTISPECIES: peptide ABC transporter substrate-binding protein [Lysinibacillus]	+	+	conversion of energy	membrane
WP_012293213.1 MULTISPECIES: ribosome small subunit-dependent GTPase A [Lysinibacillus]	+	+	responsible for the binding and the reading of the mRNA during translation	cytisolic
WP_012293257.1 MULTISPECIES: GTP-sensing pleiotropic transcriptional regulator CodY [Lysinibacillus]	+	+	global transcription regulator	cytosolic
WP_012293302.1 MULTISPECIES: transcription termination factor NusA [Lysinibacillus]	+	+	mediates the termination of RNA transcription	cytosolic
WP_012293310.1 MULTISPECIES: polyribonucleotide nucleotidyltransferase [Lysinibacillus]	+	+	Nucleotidyltransferase, RNA-binding, Transferase	cytosolic
WP_012293320.1 MULTISPECIES: BMP family protein [Lysinibacillus]	+	+	interact with specific receptors on the cell surface	membrane
WP_012293332.1 MULTISPECIES: ribonuclease Y [Lysinibacillus]	+	+	involved in the initiation of RNA degradation	cytosolic
WP_012293450.1 MULTISPECIES: LysR family transcriptional regulator [Lysinibacillus]	+	+	involved in the initiation of RNA degradation.	cytosolic
WP_012293679.1 MULTISPECIES: CoA-acylating methylmalonate-semialdehyde dehydrogenase [Lysinibacillus]	+	+	valine and pyrimidine metabolism	cytosolic
WP_012293689.1 MULTISPECIES: spore germination protein [Lysinibacillus]	+	+	specific nutrients such as sugars and amino acids	membrane
WP_012293805.1 MULTISPECIES: dynamin family protein [Lysinibacillus]	+	+	conformational transition to form the functional complex with its target DNA.	membrane
WP_012294001.1 MULTISPECIES: sporulation protein [Lysinibacillus]	+	+	produce a largely metabolically inactive dormant cell type called an “endospore”	cytosolic
WP_012294079.1 MULTISPECIES: aspartate kinase [Lysinibacillus]	+	+	catalyzes the phosphorylation of the amino acid aspartate	cytosolic
WP_012294156.1 MULTISPECIES: SDR family oxidoreductase [Lysinibacillus]	+	+	acid synthase (AHAS) are controlled by allosteric transitions of the proteins	cytosolic
WP_012295327.1 MULTISPECIES: molecular chaperone DnaK [Lysinibacillus]	+	+	refold misfolded proteins and help other proteins reach their native conformation	cytosolic
WP_012295418.1 MULTISPECIES: aspartate--tRNA ligase [Lysinibacillus]	+	+	Catalyzes the attachment of L-aspartate to tRNA(Asp) in a two-step reaction	cytosolic
WP_012295436.1 MULTISPECIES: indole-3-glycerol phosphate synthase TrpC [Lysinibacillus]	+	+	a branchpoint for the biosynthesis of tryptophan, indole, and benzoxazinoids in maize	cytosolic
WP_012295469.1 MULTISPECIES: rod shape-determining protein [Lysinibacillus]	+	+	involved in the rod shape determination in Escherichia coli, and more generally in cell shape determination of bacteria	cytosolic
WP_012295481.1 MULTISPECIES: uroporphyrinogen-III synthase [Lysinibacillus]	+	+	involved in the production of a molecule called heme.	cytosolic
WP_012295792.1 MULTISPECIES: PH domain-containing protein [Lysinibacillus]	+	+	recruiting proteins to different membranes,	membrane
WP_025113922.1 MULTISPECIES: ADP-forming succinate--CoA ligase subunit beta [Lysinibacillus]	+	+	provides nucleotide specificity of the enzyme	cytosolic
WP_031415833.1 MULTISPECIES: 30S ribosomal protein S6 [Lysinibacillus]	+	+	regulating translation of RNAs that contain the 5' terminal sequence	cytosolic
WP_031416573.1 MULTISPECIES: C40 family peptidase [Lysinibacillus]	+	+	responsible for the degradation of bacterial cell wall components	membrane
WP_031416685.1 MULTISPECIES: RNA polymerase sigma factor [Lysinibacillus]	+	+	determining the specificity of promoter DNA binding	cytosolic
WP_031416837.1 MULTISPECIES: SPASM domain-containing protein [Lysinibacillus]	+	+	regulates monocyte migration in vitro	cytosolic
WP_031418516.1 MULTISPECIES: 3-hydroxyacyl-ACP dehydratase FabZ [Lysinibacillus]	+	+	Involved in unsaturated fatty acids biosynthesis	cytosolic
WP_031418843.1 MULTISPECIES: TrkA family potassium uptake protein [Lysinibacillus]	+	+	May regulate the transport activity of TrkG and TrkH systems.	cytosolic
WP_031418882.1 MULTISPECIES: nitronate monooxygenase family protein [Lysinibacillus]	+	+	catalyze the oxidative denitrification of alkyl nitronates.	cytosolic
WP_031418973.1 MULTISPECIES: ATP-dependent DNA helicase RecG [Lysinibacillus]	+	+	a critical role in recombination and DNA repair.	cytosolic
WP_031419072.1 MULTISPECIES: (2Fe-2S)-binding protein [Lysinibacillus]	+	+	subunits of photosynthetic and respiratory electron transfer complexes, as well as subunits or domains in water soluble oxidases	cytosolic
WP_031419468.1 MULTISPECIES: recombination mediator RecR [Lysinibacillus]	+	+	facilitate the loading of recombinases like RecA onto single-stranded (ss) DNA coated by single-strand binding proteins like SSB	cytosolic
WP_031419855.1 MULTISPECIES: dipeptide/oligopeptide/nickel ABC transporter ATP-binding protein [Lysinibacillus]	+	+	convert the energy gained from ATP hydrolysis into trans-bilayer movement of substrates either into the cytoplasm	cytosolic
WP_036160656.1 MULTISPECIES: FtsX-like permease family protein [Lysinibacillus]	+	+	transport lipids targeted to the outer membrane across the inner membrane.	membrane
WP_036160791.1 MULTISPECIES: tyrosine-type recombinase/integrase [Lysinibacillus]	+	+	rearrange DNA duplexes by means of conservative site-specific recombination reaction	cytosolic
WP_036160877.1 MULTISPECIES: Ppx/GppA family phosphatase [Lysinibacillus]	+	+	functional analysis of proteins by classifying them into families and predicting domains and important sites.	cytosolic
WP_036160881.1 MULTISPECIES: CoA-acylating methylmalonate-semialdehyde dehydrogenase [Lysinibacillus]	+	+	catalyzes the irreversible oxidative decarboxylation of malonate semialdehyde and methylmalonate semialdehyde to acetyl-CoA and propionyl-CoA,	cytosolic
WP_036161427.1 MULTISPECIES: N-acetylmuramoyl-L-alanine amidase [Lysinibacillus]	+	+	catalyzes a chemical reaction that cleaves the link between N-acetylmuramoyl residues and L-amino acid residues in certain cell-wall glycopeptides.	cytosolic
WP_036161618.1 MULTISPECIES: MATE family efflux transporter [Lysinibacillus]	+	+	proton-dependent efflux transporters,	cytosolic
WP_036161669.1 MULTISPECIES: DNA helicase RecQ [Lysinibacillus]	+	+	catalyzing the reaction ATP + H2O → ADP + P and thus driving the unwinding of paired DNA and translocating in the 3' to 5' direction.	cytosolic
WP_036161745.1 MULTISPECIES: ABC transporter permease [Lysinibacillus]	+	+	couple the hydrolysis of ATP to the translocation of solutes across a biological membrane.	membrane
WP_036161951.1 MULTISPECIES: DUF6138 family protein [Lysinibacillus]	+	+	it helps the cells to adapt to low nutrient	cytosolic
WP_036162031.1 MULTISPECIES: biosynthetic-type acetolactate synthase large subunit [Lysinibacillus]	+	+	catalyzes the formation of acetohydroxybutyrate from pyruvate and 2-oxobutyrate,	cytosolic
WP_036162546.1 MULTISPECIES: response regulator transcription factor [Lysinibacillus]	+	+	induce changes in gene expression in response to an external stimulus.	cytosolic
WP_048391396.1 MULTISPECIES: tRNA (adenosine(37)-N6)-dimethylallyltransferase MiaA [Lysinibacillus]	+	+	TransferaseImported. Automatic assertion inferred from database entriesi.	cytosolic
WP_051147711.1 MULTISPECIES: MarR family transcriptional regulator [Lysinibacillus]	+	+	regulates an operon that encodes a drug efflux pump	cytosolic
WP_051563217.1 MULTISPECIES: TetR/AcrR family transcriptional regulator [Lysinibacillus]	+	+	egulates efflux pump expression,	cytosolic
WP_053596370.1 MULTISPECIES: FkbM family methyltransferase [Lysinibacillus]	+	+	Catalyzes the transfer of a methyl group from S-adenosyl-L-methionine to the 31-O-position of 31-O-demethyl-FK506.	cytosolic
WP_068983729.1 MULTISPECIES: histidine--tRNA ligase [Lysinibacillus]	+	+	Aminoacyl-tRNA synthetase, Ligase	cytosolic
WP_068983781.1 MULTISPECIES: glutamate-1-semialdehyde 2,1-aminomutase [Lysinibacillus]	+	+	catalyzes the isomerization of glutamate-1-semialdehyde (GSA) to 5-aminolevulinate (ALA)	cytosolic
WP_075807269.1 3,4-dihydroxy-2-butanone-4-phosphate synthase [Lysinibacillus agricola]	+	+	catalyses the conversion of D-ribulose 5-phosphate to formate and 3,4-dihydroxy-2-butanone 4-phosphate	cytosolic
WP_099805090.1 MULTISPECIES: malonate decarboxylase subunit epsilon [Lysinibacillus]	+	+	Enzymatic analysis of the purified recombinant	cytosolic
WP_115673784.1 MULTISPECIES: carbamoyl-phosphate synthase large subunit [Lysinibacillus]	+	+	catalyzes the ATP-dependent synthesis of carbamoyl phosphate from glutamine (EC 6.3. 5.5) or ammonia (EC 6.3. 4.16) and bicarbonate.	cytosolic
WP_126657807.1 MULTISPECIES: precorrin-6A reductase [Lysinibacillus]	+	+	part of the biosynthetic pathway to cobalamin (vitamin B12) in aerobic bacteria.	cytosolic
WP_126660401.1 MULTISPECIES: YbaB/EbfC family nucleoid-associated protein [Lysinibacillus]	+	+	binding and altering DNA conformation.	cytosolic
WP_155591959.1 MULTISPECIES: flagellin Hag [Lysinibacillus]	+	+	Acts as a homeostatic autoinhibitory regulator to control its own cytoplasmic levels.	cytosolic
WP_205447410.1 MULTISPECIES: aminotransferase class III-fold pyridoxal phosphate-dependent enzyme [Lysinibacillus]	+	+	Enzyme that catalyzes the transfer of an alpha-amino group from an amino acid to an alpha-keto acid. The amino group is usually covalently bound by the prosthetic group pyridoxal phosphate.	cytosolic
WP_008181711.1 MULTISPECIES: 30S ribosomal protein S5 [Lysinibacillus]	+	+	Ribonucleoprotein, Ribosomal protein, RNA-binding, rRNA-binding	cytosolic
WP_010860053.1 MULTISPECIES: 50S ribosomal protein L21 [Lysinibacillus]	+	+	translating mRNA into protein	cytosolic
WP_012291833.1 MULTISPECIES: DNA gyrase subunit A [Lysinibacillus]	+	+	ATPase active site on the GyrB subunit.	cytosolic
WP_012291863.1 MULTISPECIES: DNA polymerase III subunit delta' [Lysinibacillus]	+	+	responsible for most of the replicative synthesis in bacteria.	cytosolic
WP_012291901.1 MULTISPECIES: cysteine synthase A [Lysinibacillus]	+	+	stimulates the tRNase activity of CdiA-CT from E	cytosolic
WP_012291937.1 MULTISPECIES: twin-arginine translocase subunit TatC [Lysinibacillus]	+	+	actively translocate folded proteins across a lipid membrane bilayer.	cytosolic
WP_012291979.1 MULTISPECIES: methionine synthase [Lysinibacillus]	+	+	carries out a chemical reaction that converts the amino acid homocysteine to another amino acid called methionine	membrane
WP_012292010.1 MULTISPECIES: adenylosuccinate lyase [Lysinibacillus]	+	+	catalyzes two reactions in the de novo purine biosynthetic pathway.	cytosolic
WP_012292031.1 MULTISPECIES: cytochrome ubiquinol oxidase subunit I [Lysinibacillus]	+	+	component of the aerobic respiratory chain of E. coli that predominates when cells are grown at high aeration	cytosolic
WP_012292076.1 MULTISPECIES: SMC family ATPase [Lysinibacillus]	+	+	to transport a variety of different compounds, like ions and phospholipids, across a membrane using ATP hydrolysis for energy.	cytosolic
WP_012292178.1 MULTISPECIES: 3'-5' exoribonuclease YhaM [Lysinibacillus]	+	+	Catalysis of the sequential cleavage of mononucleotides from a free 3' terminus of an RNA molecule.	cytosolic
WP_012292330.1 MULTISPECIES: Fe-S cluster assembly protein SufD [Lysinibacillus]	+	+	assembly or repair of oxygen-labile iron-sulfur clusters under oxidative stress	Cytosolic
WP_012292397.1 MULTISPECIES: ornithine--oxo-acid transaminase [Lysinibacillus]	+	+	catalyzation of the interconversion of ornithine to glutamate semialdehyde	Cytosolic (Michondria)
WP_012292429.1 MULTISPECIES: GNAT family N-acetyltransferase [Lysinibacillus]	+	+	catalyzation of the transfer of the acetyl from the CoA donor to a primary amine of the acceptor	Membrane
WP_012292547.1 MULTISPECIES: GNAT family N-acetyltransferase [Lysinibacillus]	+	+	catalyzation of the transfer of the acetyl from the CoA donor to a primary amine of the acceptor	Membrane
WP_012292554.1 MULTISPECIES: choice-of-anchor I family protein [Lysinibacillus]	+	+	calcium ion binding	Membrane
WP_012292718.1 MULTISPECIES: long-chain-fatty-acid--CoA ligase [Lysinibacillus]	+	+	activates the oxidation of complex fatty acids	Cytosolic (Michondria)
WP_012292766.1 MULTISPECIES: F0F1 ATP synthase subunit alpha [Lysinibacillus]	+	+	catalyzes ATP synthesis	Cytosolic (Michondria)
WP_012292862.1 MULTISPECIES: Fic family protein [Lysinibacillus]	+	+	catalyzes the post-translational modification of proteins using phosphate-containing compound as a substrate	Cytosolic
WP_012292936.1 MULTISPECIES: TVP38/TMEM64 family protein [Lysinibacillus]	+	+	the death effector domain a (deda) family	Membrane (Plasma)
WP_012292938.1 MULTISPECIES: helicase-exonuclease AddAB subunit AddA [Lysinibacillus]	+	+	ATP-dependent DNA helicase and an ATP-dependent, dual-direction single-stranded exonuclease	Cytosolic
WP_012292989.1 MULTISPECIES: class II fructose-bisphosphate aldolase [Lysinibacillus]	+	+	Catalyzes the aldol condensation of dihydroxyacetone phosphate (DHAP or glycerone-phosphate) with glyceraldehyde 3-phosphate (G3P) to form fructose 1,6-bisphosphate (FBP) in gluconeogenesis and the reverse reaction in glycolysis	Cytosolic
WP_012293016.1 MULTISPECIES: efflux RND transporter permease subunit [Lysinibacillus]	+	+	efflux transmembrane transporter activity	Membrane (Plasma)
WP_012293093.1 MULTISPECIES: pyruvate dehydrogenase (acetyl-transferring) E1 component subunit alpha [Lysinibacillus]	+	+	catalyzes the overall conversion of pyruvate to acetyl-CoA and CO2, and thereby links the glycolytic pathway to the tricarboxylic cycle	Cytosolic (Michondria)
WP_012293095.1 MULTISPECIES: 2-oxo acid dehydrogenase subunit E2 [Lysinibacillus]	+	+	acyltransferase activity	Cytosolic
WP_012293096.1 MULTISPECIES: dihydrolipoyl dehydrogenase [Lysinibacillus]	+	+	production of energy for cells	Cytosolic (Michondria)
WP_012293136.1 MULTISPECIES: glycerophosphodiester phosphodiesterase [Lysinibacillus]	+	+	Hydrolyzes glycerolphosphoglycerol, glycerophosphocholine and glycerophosphoethanolamine in vitro.	Membrane (Plasma)
WP_012293254.1 MULTISPECIES: FADH(2)-oxidizing methylenetetrahydrofolate--tRNA-(uracil(54)-C(5))-methyltransferase TrmFO [Lysinibacillus]	+	+	Catalyzes the folate-dependent formation of 5-methyl-uridine at position 54 (M-5-U54) in all tRNAs	Membrane (Plasma)
WP_012293292.1 MULTISPECIES: translation elongation factor Ts [Lysinibacillus]	+	+	Facilitates the Formation and Disassembly of the Escherichia coli	Cytosolic (Michondria)
WP_012293316.1 MULTISPECIES: aspartate-semialdehyde dehydrogenase [Lysinibacillus]	+	+	Catalyzes the NADPH-dependent formation of L-aspartate-semialdehyde (L-ASA) by the reductive dephosphorylation of L-aspartyl-4-phosphate	Cytosolic
WP_012293385.1 MULTISPECIES: recombinase family protein [Lysinibacillus]	+	+	DNA binding & DNA strand exchange activity	Cytosolic
WP_012293531.1 MULTISPECIES: chitobiase/beta-hexosaminidase C-terminal domain-containing protein [Lysinibacillus]	+	+	Unknown	Unknown
WP_012293535.1 MULTISPECIES: class 1b ribonucleoside-diphosphate reductase subunit alpha [Lysinibacillus]	+	+	Provides the precursors necessary for DNA synthesis. Catalyzes the biosynthesis of deoxyribonucleotides from the corresponding ribonucleotides	Cytosolic
WP_012293630.1 MULTISPECIES: terminase family protein [Lysinibacillus]	+	+	ATP driven molecular motor necessary for viral DNA translocation into empty capsids and as an endonuclease that cuts the viral genome from the concetamer to initiate and to end the packaging reaction	Cytosolic
WP_012293906.1 MULTISPECIES: mannonate oxidoreductase [Lysinibacillus]	+	+	pathway pentose and glucuronate interconversion (Carbohydrate metabolism)	Cytosolic
WP_012293945.1 MULTISPECIES: ABC transporter ATP-binding protein [Lysinibacillus]	+	+	energy coupling to the transport system	Membrane (Plasma)
WP_012293962.1 MULTISPECIES: PepSY domain-containing protein [Lysinibacillus]	+	+	nutrient production to pathogenicity	Membrane
WP_012293968.1 MULTISPECIES: DUF418 domain-containing protein [Lysinibacillus]	+	+	Unknown	Membrane
WP_012294172.1 MULTISPECIES: collagenase [Lysinibacillus]	+	+	assist in destroying extracellular structures in the pathogenesis of bacteria	Membrane (Plasma)
WP_012295188.1 MULTISPECIES: hypothetical protein [Lysinibacillus]	+	+	Unknown	Unknown
WP_012295212.1 MULTISPECIES: transcriptional repressor [Lysinibacillus]	+	+	prevent transcription of nearby genes	Cytosolic
WP_012295261.1 MULTISPECIES: TrkA family potassium uptake protein [Lysinibacillus]	+	+	regulate the transport activity of TrkG and TrkH systems. Binds to NAD+ and NADH	Membrane (Plasma)
WP_012295301.1 MULTISPECIES: tyrosine-type recombinase/integrase [Lysinibacillus]	+	+	rearrange DNA duplexes by means of conservative site-specific recombination reactions	Membrane
WP_012295476.1 MULTISPECIES: valine--tRNA ligase [Lysinibacillus]	+	+	Catalyzes the attachment of valine to tRNA(Val).	Cytosolic
WP_012295491.1 MULTISPECIES: trigger factor [Lysinibacillus]	+	+	protein exportation & acts as a chaperone by maintaining the newly synthesized secretory and non-secretory proteins in an open conformation	Cytosolic
WP_012295540.1 MULTISPECIES: DUF421 domain-containing protein [Lysinibacillus]	+	+	Unknown	Membrane
WP_012295569.1 MULTISPECIES: electron transfer flavoprotein subunit beta/FixA family protein [Lysinibacillus]	+	+	electron transfer activity	Membrane
WP_012295696.1 MULTISPECIES: UDP-N-acetylmuramate--L-alanine ligase [Lysinibacillus]	+	+	catalyzes the ATP-dependent ligation of L-alanine (Ala) and UDP-N-acetylmuramic acid (UNAM) to form UDP-N-acetylmuramyl-L-alanine (UNAM-Ala	Cytosolic
WP_012295794.1 MULTISPECIES: DEAD/DEAH box helicase [Lysinibacillus]	+	+	RNA metabolism (ATP binding, hydrolase activity, nucleic acid binding, RNA helicase activity)	Cytosolic
WP_012295943.1 MULTISPECIES: PLP-dependent aminotransferase family protein [Lysinibacillus]	+	+	share certain mechanistic features with other pyridoxal-phosphate dependent enzymes	Cytosolic
WP_012295993.1 MULTISPECIES: ABC-F type ribosomal protection protein [Lysinibacillus]	+	+	ATP Binding Activity	Cytosolic
WP_012296105.1 MULTISPECIES: DUF4003 family protein [Lysinibacillus]	+	+	Unknown	Unknown
WP_012296206.1 MULTISPECIES: adenylosuccinate synthase [Lysinibacillus]	+	+	interconverts IMP and AMP to regulate the nucleotide levels in various tissues, and which contributes to glycolysis and ammoniagenesis. Catalyzes the first committed step in the biosynthesis of AMP from IMP	Cytosolic
WP_012296215.1 MULTISPECIES: redox-regulated ATPase YchF [Lysinibacillus]	+	+	GTP Binding Activity	Cytosolic
WP_012296222.1 MULTISPECIES: tRNA uridine-5-carboxymethylaminomethyl(34) synthesis enzyme MnmG [Lysinibacillus]	+	+	involved in the addition of a carboxymethylaminomethyl (cmnm) group at the wobble position (U34) of certain tRNAs, forming tRNA-cmnm5s2U34	Cytosolic
WP_025113851.1 MULTISPECIES: RNA polymerase sporulation sigma factor SigE [Lysinibacillus]	+	+	promote the attachment of RNA polymerase to specific initiation sites and are then released	Cytosolic
WP_025116775.1 MULTISPECIES: cell division ATP-binding protein FtsE [Lysinibacillus]	+	+	involved in cellular division & important for assembly or stability of the septal ring.	Membrane (Plasma)
WP_031415820.1 MULTISPECIES: response regulator YycF [Lysinibacillus]	+	+	DNA binding	Cytosolic
WP_031416030.1 MULTISPECIES: DNA topoisomerase IV subunit B [Lysinibacillus]	+	+	chromosome segregation	Cytosolic
WP_031416178.1 MULTISPECIES: formate dehydrogenase accessory sulfurtransferase FdhD [Lysinibacillus]	+	+	Required for formate dehydrogenase (FDH) activity. Acts as a sulfur carrier protein that transfers sulfur from IscS to the molybdenum cofactor prior to its insertion into FDH.	Cytosolic
WP_031416518.1 MULTISPECIES: MurR/RpiR family transcriptional regulator [Lysinibacillus]	+	+	carbohydrate derivative binding, DNA-binding transcription factor activity	Cytosolic
WP_031416550.1 MULTISPECIES: GTPase HflX [Lysinibacillus]	+	+	associates with the 50S ribosomal subunit and may have a role during protein synthesis or ribosome biogenesis. In vitro, also exhibits ATPase activity	Cytosolic
WP_031416724.1 MULTISPECIES: DNA-directed RNA polymerase subunit beta' [Lysinibacillus]	+	+	DNA-dependent RNA polymerase (RNAP) catalyzes the transcription of DNA into RNA using the four ribonucleoside triphosphates as substrates	Cytosolic
WP_031417388.1 MULTISPECIES: lipoate--protein ligase family protein [Lysinibacillus]	+	+	Catalyzes both the ATP-dependent activation of exogenously supplied lipoate to lipoyl-AMP and the transfer of the activated lipoyl onto the lipoyl domains of lipoate-dependent enzymes	Cytosolic
WP_031418674.1 MULTISPECIES: TetR/AcrR family transcriptional regulator [Lysinibacillus]	+	+	regulate gene expression in bacteria	Cytosolic
WP_031418679.1 MULTISPECIES: accessory Sec system translocase SecA2 [Lysinibacillus]	+	+	export GspB, a serine-rich repeat cell wall protein encoded upstream in the same operon	Membrane (Plasma)
WP_031419663.1 MULTISPECIES: pentapeptide repeat-containing protein [Lysinibacillus]	+	+	encode the folding of a novel right-handed quadrilateral beta-helix	Cytosolic
WP_036075052.1 MULTISPECIES: phage baseplate assembly protein V [Lysinibacillus]	+	+	baseplate assembly with BW1 (Mup46), BW2 (Mup47), and BW3 (Mup48) proteins	Membrane
WP_036160485.1 MULTISPECIES: AAA family ATPase [Lysinibacillus]	+	+	ATP binding, ATP hydrolysis activity	Cytosolic
WP_036161309.1 MULTISPECIES: ABC transporter permease/substrate-binding protein [Lysinibacillus]	+	+	Involved in the translocation of an unknown substrate across the membrane	Membrane (Plasma)
WP_036161677.1 MULTISPECIES: IS607 family transposase [Lysinibacillus]	+	+	DNA binding, DNA strand exchange activity	Cytosolic
WP_036161791.1 MULTISPECIES: MFS transporter [Lysinibacillus]	+	+	facilitate movement of small solutes across cell membranes in response to chemiosmotic gradients	Membrane
WP_036161987.1 MULTISPECIES: AMP-binding protein [Lysinibacillus]	+	+	catalyzes the formation of acetyl-CoA from acetate and CoA	Membrane
WP_036161990.1 MULTISPECIES: non-ribosomal peptide synthetase [Lysinibacillus]	+	+	catalyze the synthesis of highly diverse natural products of bacterial or fungal origin	Cytosolic
WP_036162215.1 MULTISPECIES: U32 family peptidase [Lysinibacillus]	+	+	catalyses the hydrolysis of the amino-terminal peptide bond of an N-acetylated protein to generate a N-acetylated amino acid and a protein with a free amino-terminus	Cytosolic
WP_036162238.1 MULTISPECIES: Holliday junction branch migration DNA helicase RuvB [Lysinibacillus]	+	+	promote strand exchange reactions in homologous recombination	Cytosolic
WP_036162346.1 MULTISPECIES: AroM family protein [Lysinibacillus]	+	+	This protein of unknown function is encoded by a gene that cotranscribes with the aroL gene, which codes for shikimate kinase II.	Unknown
WP_036162380.1 MULTISPECIES: low molecular weight phosphotyrosine protein phosphatase [Lysinibacillus]	+	+	acts on many phosphotyrosine-containing cellular proteins that are primarily involved in signal transduction	Cytosolic
WP_036162515.1 MULTISPECIES: 23S rRNA (uracil(1939)-C(5))-methyltransferase RlmD [Lysinibacillus]	+	+	Catalyzes the formation of 5-methyl-uridine at position 1939 (m5U1939) in 23S rRNA	Cytosolic
WP_036162603.1 MULTISPECIES: PolC-type DNA polymerase III [Lysinibacillus]	+	+	Required for replicative DNA synthesis	Cytosolic
WP_036162758.1 MULTISPECIES: bile acid:sodium symporter [Lysinibacillus]	+	+	involved in the uptake of all types of bile acids from portal blood plasma	Membrane
WP_036162792.1 MULTISPECIES: non-ribosomal peptide synthetase [Lysinibacillus]	+	+	catalyze the synthesis of highly diverse natural products of bacterial or fungal origin	Cytosolic
WP_036162823.1 MULTISPECIES: polysaccharide biosynthesis protein [Lysinibacillus]	+	+	Involved in the regulation of capsular polysaccharide biosynthesis	Membrane (Plasma)
WP_036225052.1 MULTISPECIES: 2,3-butanediol dehydrogenase [Lysinibacillus]	+	+	oxidoreductase activity	Cytosolic
WP_036225924.1 MULTISPECIES: preprotein translocase subunit SecA [Lysinibacillus]	+	+	acts as a motor subunit	Cytosolic
WP_048393118.1 MULTISPECIES: sigma-70 family RNA polymerase sigma factor [Lysinibacillus]	+	+	directs bacterial or plastid core RNA polymerase to specific promoter elements that are situated 10 and 35 base-pairs upstream of transcription-initiation points	Membrane
WP_051563248.1 MULTISPECIES: DUF3885 domain-containing protein [Lysinibacillus]	+	+	Unknown	Unknown
WP_052323565.1 MULTISPECIES: stalk domain-containing protein [Lysinibacillus]	+	+	play a role as p53/TP53 inhibitor and thus may have oncogenic activity	Cytosolic
WP_053595319.1 MULTISPECIES: riboflavin synthase [Lysinibacillus]	+	+	Catalyzes the dismutation of two molecules of 6,7-dimethyl-8-ribityllumazine, resulting in the formation of riboflavin and 5-amino-6-(D-ribitylamino)uracil	Cytosolic
WP_058844806.1 MULTISPECIES: alanine dehydrogenase [Lysinibacillus]	+	+	Catalyzes the reversible oxidative deamination of L-alanine to pyruvate. Oxidative deamination proceeds through a sequential, ordered ternary-binary mechanism, where NAD+ binds first followed by L-alanine; the products are released in the order ammonia, pyruvate and NADH	Cytosolic
WP_068983117.1 MULTISPECIES: translation initiation factor IF-2 [Lysinibacillus]	+	+	initiation of protein synthesis. May protect N-formylmethionyl-tRNA(fMet) from spontaneous hydrolysis	Cytosolic
WP_068983165.1 MULTISPECIES: type I DNA topoisomerase [Lysinibacillus]	+	+	cleave one DNA strand and pass either one or two DNA strands through the break before resealing it	Cytosolic
WP_068985713.1 MULTISPECIES: protein arginine kinase [Lysinibacillus]	+	+	catalyzes the phosphorylation of arginine residues	Cytosolic
WP_068986766.1 MULTISPECIES: chaperonin GroEL [Lysinibacillus]	+	+	assisting protein folding	Cytosolic
WP_075807287.1 MULTISPECIES: zinc-ribbon domain-containing protein [Lysinibacillus]	+	+	metal-binding domain in multi-domain proteins	Cytosolic
WP_082011579.1 MULTISPECIES: reverse transcriptase domain-containing protein [Lysinibacillus]	+	+	transcribes single-stranded RNA into DNA	Cytosolic
WP_083227131.1 MULTISPECIES: tRNA (adenosine(37)-N6)-threonylcarbamoyltransferase complex ATPase subunit type 1 TsaE [Lysinibacillus]	+	+	transferase activity	Cytosolic
WP_089985339.1 MULTISPECIES: ribosome recycling factor [Lysinibacillus]	+	+	Responsible for the release of ribosomes from messenger RNA at the termination of protein biosynthesis	Cytosolic (Michondria)
WP_103117223.1 MULTISPECIES: serine--tRNA ligase [Lysinibacillus]	+	+	Catalyzes the attachment of serine to tRNA(Ser)	Cytosolic
WP_107922044.1 MULTISPECIES: glutamyl-tRNA reductase [Lysinibacillus]	+	+	Involved in the regulation of glutamyl-tRNA reductase (GluTR) which is important for the synthesis and distribution of 5-aminolevulinate, a precursor in heme and chlorophyll biosynthesis, Stimulates GluTR activity and regulates glutamate-1-semialdehyde release. May play a role in heme metabolism, Necessary for efficient photosynthetic electron transport in chloroplasts	Membrane
WP_107922374.1 MULTISPECIES: leucine--tRNA ligase [Lysinibacillus]	+	+	Catalyzes the specific attachment of an amino acid to its cognate tRNA in a two step reaction	Cytosolic
WP_126659346.1 MULTISPECIES: chaperonin GroEL [Lysinibacillus]	+	+	assisting protein folding	Cytosolic
WP_155593039.1 MULTISPECIES: 30S ribosomal protein S7 [Lysinibacillus]	+	+	binds directly to 16S rRNA where it nucleates assembly of the head domain of the 30S subuni	Cytosolic
WP_171821110.1 MULTISPECIES: DNA translocase FtsK [Lysinibacillus]	+	+	coordinates cell division and chromosome segregation	Membrane (Plasma)
WP_197148452.1 MULTISPECIES: isoleucine--tRNA ligase [Lysinibacillus]	+	+	Catalyzes the specific attachment of an amino acid to its cognate tRNA in a 2 step reaction	Cytosolic
WP_206700980.1 MULTISPECIES: DUF3006 family protein [Lysinibacillus]	+	+	Unknown	Unknown
WP_206701033.1 MULTISPECIES: PucR family transcriptional regulator [Lysinibacillus]	+	+	regulation of expression of the genes of the purine catabolic pathway	Cytosolic
WP_206701061.1 MULTISPECIES: DNA polymerase III subunit gamma/tau [Lysinibacillus]	+	+	replicative synthesis in bacteria	Cytosolic
WP_206701069.1 MULTISPECIES: methyl-accepting chemotaxis protein [Lysinibacillus]	+	+	Receptor for the attractant L-serine and related amino acids	Membrane (Plasma)
WP_206701070.1 MULTISPECIES: imidazolonepropionase [Lysinibacillus]	+	+	Catalytic activity	Cytosolic
WP_217580989.1 MULTISPECIES: SDR family oxidoreductase [Lysinibacillus]	+	+	oxidoreductase activity	Membrane
WP_217581244.1 MULTISPECIES: GNAT family N-acetyltransferase [Lysinibacillus]	+	+	aminoglycoside antibiotic resistance, transcription regulation, protein acetylation and stress reaction	Cytosolic
WP_217581450.1 MULTISPECIES: SagB/ThcOx family dehydrogenase [Lysinibacillus]	+	+	cleaves polymerized glycan strands	Membrane
WP_225316267.1 MULTISPECIES: isoprenyl transferase [Lysinibacillus]	+	+	Catalyzes the condensation of isopentenyl diphosphate (IPP) with allylic pyrophosphates generating different type of terpenoids.	Membrane
WP_232735586.1 MULTISPECIES: peptide ABC transporter substrate-binding protein [Lysinibacillus]	+	+	convert the energy gained from ATP hydrolysis into trans-bilayer movement of substrates either into the cytoplasm (import) or out of the cytoplasm (export)	Membrane
WP_232901020.1 MULTISPECIES: cell wall-binding protein [Lysinibacillus]	+	+	Increases in stationary phase in a strain lacking the WprA protease	Membrane
WP_232901024.1 MULTISPECIES: ABC transporter ATP-binding protein/permease [Lysinibacillus]	+	+	Involved in the translocation of an unknown substrate across the membrane	Membrane (Plasma)
WP_206700908.1 MULTISPECIES: RloB domain-containing protein [Lysinibacillus]	+	-	influence the formation of the nucleoprotein structure	Cytosolic
WP_206701041.1 MULTISPECIES: TrkH family potassium uptake protein [Lysinibacillus]	+	-	Transport in the absence of SapD and SapF is dependent on a high membrane potential and a high cytoplasmic ATP concentration	Membrane (Plasma)
WP_206701081.1 MULTISPECIES: RNA polymerase sigma factor [Lysinibacillus]	+	-	initiation of transcription	Cytosolic
WP_217581672.1 MULTISPECIES: CoA-acylating methylmalonate-semialdehyde dehydrogenase [Lysinibacillus]	+	-	Plays a role in valine and pyrimidine metabolism. Binds fatty acyl-CoA	Cytosolic (Michondria)
WP_227256907.1 MULTISPECIES: NEAT domain-containing protein [Lysinibacillus]	+	-	Promotes the exchange of GDP to GTP, converting inactive GDP-bound Rab proteins into their active GTP-bound form	Cytosolic
WP_004269405.1 MULTISPECIES: ribosome biogenesis GTPase YlqF [Lysinibacillus]	+	-	50S ribosomal subunit assembly	Cytosolic
WP_008179143.1 MULTISPECIES: DUF2639 domain-containing protein [Lysinibacillus]	+	-	Unknown	Unknown
WP_008180348.1 MULTISPECIES: membrane protein insertion efficiency factor YidD [Lysinibacillus]	+	-	insertion of integral membrane proteins into the membrane.	Membrane (Plasma)
WP_008180932.1 MULTISPECIES: RNA polymerase sporulation sigma factor SigK [Lysinibacillus]	+	-	promote the attachment of RNA polymerase to specific initiation sites and are then released	Cytosolic
WP_008181723.1 MULTISPECIES: 30S ribosomal protein S17 [Lysinibacillus]	+	-	binds specifically to the 5'-end of 16S ribosomal RNA, translational accuracy; neamine-resistant ribosomes show reduced neamine-induced misreading in vitro	Cytosolic
WP_008181913.1 MULTISPECIES: 50S ribosomal protein L2 [Lysinibacillus]	+	-	association of the ribosomal subunits, tRNA binding to A and P sites and peptidyl transfer	Cytosolic
WP_010857552.1 MULTISPECIES: metal-sensitive transcriptional regulator [Lysinibacillus]	+	-	regulation of trace metal metabolism	Cytosolic
WP_010858198.1 MULTISPECIES: DUF2187 family protein [Lysinibacillus]	+	-	Unknown	Unknown
WP_010858326.1 MULTISPECIES: division/cell wall cluster transcriptional repressor MraZ [Lysinibacillus]	+	-	Negatively regulates its own expression and that of the subsequent genes in the proximal part of the division and cell wall (dcw) gene cluster	Cytosolic
WP_010859802.1 MULTISPECIES: FHA domain-containing protein [Lysinibacillus]	+	-	recognize phosphothreonine epitopes on proteins	Cytosolic
WP_012291782.1 MULTISPECIES: site-specific integrase [Lysinibacillus]	+	+	DNA molecules are rearranged by breaking and rejoining the strands at specific points	Cytosolic
WP_012291839.1 MULTISPECIES: asparagine synthase (glutamine-hydrolyzing) [Lysinibacillus]	+	-	generates asparagine from aspartate	Cytosolic
WP_012291848.1 MULTISPECIES: heavy metal translocating P-type ATPase [Lysinibacillus]	+	-	ATPase-coupled cation transmembrane transporter activity	Membrane (Plasma)
WP_012291874.1 MULTISPECIES: 16S rRNA (adenine(1518)-N(6)/adenine(1519)-N(6))-dimethyltransferase RsmA [Lysinibacillus]	+	-	16S rRNA (adenine(1518)-N(6)/adenine(1519)-N(6))-dimethyltransferase activity	Membrane
WP_012291882.1 MULTISPECIES: ribose-phosphate diphosphokinase [Lysinibacillus]	+	-	Catalyzes the synthesis of phosphoribosylpyrophosphate (PRPP) that is essential for nucleotide synthesis.	Cytosolic
WP_012291887.1 MULTISPECIES: polysaccharide biosynthesis protein [Lysinibacillus]	+	-	regulation of capsular polysaccharide biosynthesis	Cytosolic
WP_012291903.1 MULTISPECIES: aminodeoxychorismate/anthranilate synthase component II [Lysinibacillus]	+	-	Complements a glutamine amidotransferase-negative mutant	Membrane
WP_012291905.1 MULTISPECIES: dihydropteroate synthase [Lysinibacillus]	+	-	produces dihydropteroate in bacteria	Cytosolic
WP_012291919.1 MULTISPECIES: 4-hydroxy-tetrahydrodipicolinate synthase [Lysinibacillus]	+	-	Catalyzes the condensation of (S)-aspartate-beta-semialdehyde [(S)-ASA] and pyruvate to 4-hydroxy-tetrahydrodipicolinate (HTPA)	Cytosolic
WP_012291949.1 MULTISPECIES: DUF4132 domain-containing protein [Lysinibacillus]	+	-	Unknown	Unknown
WP_012291986.1 MULTISPECIES: phosphate ABC transporter ATP-binding protein [Lysinibacillus]	+	-	Part of the ABC transporter complex PstSACB involved in phosphate import. Responsible for energy coupling to the transport system.	Membrane
WP_012291990.1 MULTISPECIES: nicotinate phosphoribosyltransferase [Lysinibacillus]	+	-	Catalyzes the first step in the biosynthesis of NAD from nicotinic acid, the ATP-dependent synthesis of beta-nicotinate D-ribonucleotide from nicotinate and 5-phospho-D-ribose 1-phosphate	Membrane (Plasma)
WP_012291997.1 MULTISPECIES: ABC transporter ATP-binding protein [Lysinibacillus]	+	-	convert the energy gained from ATP hydrolysis into trans-bilayer movement of substrates either into the cytoplasm (import) or out of the cytoplasm (export)	Cytosolic
WP_012292015.1 MULTISPECIES: amidophosphoribosyltransferase [Lysinibacillus]	+	-	atalyzing the conversion of 5-phosphoribosyl-1-pyrophosphate (PRPP) into 5-phosphoribosyl-1-amine (PRA), using the amine group from a glutamine side-chain	Membrane
WP_012292028.1 MULTISPECIES: Asp-tRNA(Asn)/Glu-tRNA(Gln) amidotransferase subunit GatA [Lysinibacillus]	+	-	glutaminyl-tRNA synthase (glutamine-hydrolyzing) activity	Cytosolic
WP_012292035.1 MULTISPECIES: tRNA-dihydrouridine synthase [Lysinibacillus]	+	-	Catalyzes the synthesis of 5,6-dihydrouridine (D), a modified base found in the D-loop of most tRNAs, via the reduction of the C5-C6 double bond in target uridines. DusC specifically modifies U16 in tRNAs.	Cytosolic
WP_012292053.1 MULTISPECIES: SpoVR family protein [Lysinibacillus]	+	-	Appears to be involved in spore cortex formation	Cytosolic
WP_012292075.1 MULTISPECIES: exonuclease SbcCD subunit D [Lysinibacillus]	+	-	cleaves DNA hairpin structures	Cytosolic
WP_012292082.1 MULTISPECIES: polyphosphate kinase [Lysinibacillus]	+	-	catalyzes the formation of polyphosphate from ATP	Cytosolic
WP_012292091.1 MULTISPECIES: YihY/virulence factor BrkB family protein [Lysinibacillus]	+	-	Unknown	Membrane
WP_012292124.1 MULTISPECIES: D-2-hydroxyacid dehydrogenase [Lysinibacillus]	+	-	NAD binding, oxidoreductase activity, acting on the CH-OH group of donors, NAD or NADP as acceptor	Cytosolic
WP_012292132.1 MULTISPECIES: SDR family oxidoreductase [Lysinibacillus]	+	+	catalyzing the redox of the hydroxyl/ketone group of the hormone.	Cytosolic
WP_012292144.1 MULTISPECIES: tRNA epoxyqueuosine(34) reductase QueG [Lysinibacillus]	+	-	Catalyzes the conversion of epoxyqueuosine (oQ) to queuosine (Q), which is a hypermodified base found in the wobble positions of tRNA(Asp), tRNA(Asn), tRNA(His) and tRNA(Tyr).	Cytosolic
WP_012292174.1 MULTISPECIES: rhodanese-related sulfurtransferase [Lysinibacillus]	+	-	transferase activity	Membrane
WP_012292176.1 MULTISPECIES: DNA repair exonuclease [Lysinibacillus]	+	-	repairing damaged DNA	Cytosolic
WP_012292180.1 MULTISPECIES: peptidylprolyl isomerase [Lysinibacillus]	+	-	Catalyzes the cis-trans isomerization of proline imidic peptide bonds in oligopeptides	Cytosolic
WP_012292230.1 MULTISPECIES: thioredoxin-disulfide reductase [Lysinibacillus]	+	-	Catalytic activity	Cytosolic
WP_012292243.1 MULTISPECIES: central glycolytic genes regulator [Lysinibacillus]	+	-	represses the transcription of the gapA operon	Cytosolic
WP_012292245.1 MULTISPECIES: phosphoglycerate kinase [Lysinibacillus]	+	-	Catalyzes one of the two ATP producing reactions in the glycolytic pathway via the reversible conversion of 1,3-diphosphoglycerate to 3-phosphoglycerate	Cytosolic
WP_012292249.1 MULTISPECIES: DUF6241 domain-containing protein [Lysinibacillus]	+	-	Unknown	Unknown
WP_012292275.1 MULTISPECIES: HNH endonuclease [Lysinibacillus]	+	-	endonuclease activity	Cytosolic
WP_012292331.1 MULTISPECIES: cysteine desulfurase [Lysinibacillus]	+	-	mobilize the sulfur from L-cysteine to yield L-alanine	Cytosolic
WP_012292335.1 MULTISPECIES: DUF72 domain-containing protein [Lysinibacillus]	+	-	Unknown	Unknown
WP_012292344.1 MULTISPECIES: DUF86 domain-containing protein [Lysinibacillus]	+	-	ribonuclease activity	Cytosolic
WP_012292372.1 MULTISPECIES: phosphoadenylyl-sulfate reductase [Lysinibacillus]	+	-	synthesizes sulfite from sulfate	Cytosolic
WP_012292434.1 MULTISPECIES: universal stress protein [Lysinibacillus]	+	-	ATP binding	Cytosolic
WP_012292450.1 MULTISPECIES: methyl-accepting chemotaxis protein [Lysinibacillus]	+	-	Receptor for the attractant L-serine and related amino acids	Membrane (Plasma)
WP_012292453.1 MULTISPECIES: VanZ family protein [Lysinibacillus]	+	+	protect bacteria from lipoglycopeptide antibiotics by affecting their binding to the cell surface.	Membrane
WP_012292471.1 MULTISPECIES: AraC family transcriptional regulator [Lysinibacillus]	+	-	binds to the target DNA and regulates bacterial virulence by sensing small molecule inducers	Cytosolic
WP_012292487.1 MULTISPECIES: response regulator transcription factor [Lysinibacillus]	+	-	induce changes in gene expression in response to an external stimulus	Cytosolic
WP_012292501.1 MULTISPECIES: sensor histidine kinase [Lysinibacillus]	+	+	detect osmolarity and some hormones	Cytosolic
WP_012292514.1 MULTISPECIES: DUF2252 family protein [Lysinibacillus]	+	-	Unknown	Unknown
WP_012292528.1 MULTISPECIES: serine hydrolase [Lysinibacillus]	+	-	hydrolase activity	Cytosolic
WP_012292559.1 MULTISPECIES: SNF2-related protein [Lysinibacillus]	+	-	transcriptional activation	Cytosolic
WP_012292565.1 MULTISPECIES: CoA transferase subunit A [Lysinibacillus]	+	-	Catalyzes the transfer of the CoA moiety from acetyl-CoA to (R)-2-hydroxyglutarate and related compounds like glutaconate.	Cytosolic
WP_012292593.1 MULTISPECIES: dipeptide epimerase [Lysinibacillus]	+	-	activity with a variety of hydrophobic dipeptides (in vitro). Enzyme activity is highest with L-Phe-L-Tyr, but is still relatively low, suggesting that L-Phe-L-Tyr is not the physiological substrate.	Cytosolic
WP_012292605.1 MULTISPECIES: glycerol-3-phosphate acyltransferase [Lysinibacillus]	+	-	catalyzes the conversion of glycerol-3-phosphate and long-chain acyl-CoA to lysophosphatidic acid	Cytosolic
WP_012292623.1 MULTISPECIES: saccharopine dehydrogenase NADP-binding domain-containing protein [Lysinibacillus]	+	-	oxidoreductase activity	Cytosolic
WP_012292640.1 MULTISPECIES: dipeptidase [Lysinibacillus]	+	-	hydrolyze bound pairs of amino acids, called dipeptides	Cytosolic
WP_012292683.1 MULTISPECIES: aspartate aminotransferase family protein [Lysinibacillus]	+	-	Biosynthesis of L-glutamate from L-aspartate or L-cysteine	Cytosolic
WP_012292704.1 MULTISPECIES: lipoate--protein ligase family protein [Lysinibacillus]	+	-	Catalyzes both the ATP-dependent activation of exogenously supplied lipoate to lipoyl-AMP and the transfer of the activated lipoyl onto the lipoyl domains of lipoate-dependent enzymes	Cytosolic
WP_012292711.1 MULTISPECIES: PBP1A family penicillin-binding protein [Lysinibacillus]	+	-	biosynthesis of peptidoglycan (PG), the main component of bacterial cell walls	Membrane
WP_012292715.1 MULTISPECIES: DUF1934 domain-containing protein [Lysinibacillus]	+	-	Unknown	Unknown
WP_012292731.1 MULTISPECIES: methylmalonyl-CoA mutase family protein [Lysinibacillus]	+	-	catalyzes the isomerization of methylmalonyl-CoA to succinyl-CoA in humans	Cytosolic
WP_012292738.1 MULTISPECIES: fructose-6-phosphate aldolase [Lysinibacillus]	+	-	atalyzes the reversible formation of fructose 6-phosphate from dihydroxyacetone (DHA) and D-glyceraldehyde 3-phosphate via an aldolization reaction	Cytosolic
WP_012292740.1 MULTISPECIES: class II fructose-bisphosphatase [Lysinibacillus]	+	-	Catalyzes the aldol condensation of dihydroxyacetone phosphate (DHAP or glycerone-phosphate) with glyceraldehyde 3-phosphate (G3P) to form fructose 1,6-bisphosphate (FBP) in gluconeogenesis and the reverse reaction in glycolysis	Cytosolic
WP_012292749.1 MULTISPECIES: thymidine kinase [Lysinibacillus]	+	-	catalyses the phosphorylation of deoxythymidine to deoxythymidine monophosphate	Cytosolic
WP_012292768.1 MULTISPECIES: F0F1 ATP synthase subunit beta [Lysinibacillus]	+	-	Catalytic activity	Cytosolic (Michondria)
WP_012292787.1 MULTISPECIES: DUF5693 family protein [Lysinibacillus]	+	-	Unknown	Unknown
WP_012292890.1 MULTISPECIES: sensor histidine kinase [Lysinibacillus]	+	+	detect osmolarity and some hormones	Cytosolic
WP_012292897.1 MULTISPECIES: flagellar protein FlgN [Lysinibacillus]	+	-	efficient initiation of filament assembly	Cytosolic
WP_012292898.1 MULTISPECIES: flagellar hook-associated protein FlgK [Lysinibacillus]	+	-	structural molecule activity	Cytosolic
WP_012292903.1 MULTISPECIES: DUF115 domain-containing protein [Lysinibacillus]	+	-	Unknown	Membrane
WP_012292908.1 MULTISPECIES: acylneuraminate cytidylyltransferase family protein [Lysinibacillus]	+	-	Catalyzes the activation of N-acetylneuraminic acid (NeuNAc) to cytidine 5'-monophosphate N-acetylneuraminic acid (CMP-NeuNAc), a substrate required for the addition of sialic acid. Has some activity toward NeuNAc, N-glycolylneuraminic acid (Neu5Gc) or 2-keto-3-deoxy-D-glycero-D-galacto-nononic acid (KDN)	Cytosolic
WP_012292923.1 MULTISPECIES: DUF4097 family beta strand repeat-containing protein [Lysinibacillus]	+	-	unknown	Cytosolic
WP_012292930.1 MULTISPECIES: PDZ domain-containing protein [Lysinibacillus]	+	-	Mediates docking of ADAM10 to zonula adherens by interacting with PLEKHA7 which is required for PLEKHA7 to interact with the ADAM10-binding protein TSPAN33.	Membrane (Plasma)
WP_012292940.1 MULTISPECIES: fumarylacetoacetate hydrolase family protein [Lysinibacillus]	+	-	hydrolase activity	Cytosolic
WP_012292950.1 MULTISPECIES: AAA family ATPase [Lysinibacillus]	+	-	nucleophilic attack on the ATP gamma-phosphate by an activated water molecule, leading to movement of the N-terminal and C-terminal AAA subdomains relative to each other.	Cytosolic
WP_012292993.1 MULTISPECIES: sn-glycerol-3-phosphate ABC transporter ATP-binding protein UgpC [Lysinibacillus]	+	-	sn-glycerol-3-phosphate import & responsible for energy coupling to the transport system (Probable)	Membrane
WP_012293022.1 MULTISPECIES: B12-binding domain-containing radical SAM protein [Lysinibacillus]	+	-	catalytic activity	Cytosolic
WP_012293064.1 MULTISPECIES: TlpA family protein disulfide reductase [Lysinibacillus]	+	-	Unknown	Unknown
WP_012293075.1 MULTISPECIES: bifunctional lysylphosphatidylglycerol flippase/synthetase MprF [Lysinibacillus]	+	-	Staphylococcus aureus virulence and it is involved in resistance to the CAMP-like antibiotic daptomycin	Membrane (Plasma)
WP_012293077.1 MULTISPECIES: family 10 glycosylhydrolase [Lysinibacillus]	+	-	hydrolase activity, hydrolyzing O-glycosyl compounds	Cytosolic
WP_012293081.1 MULTISPECIES: ribonuclease J1 [Lysinibacillus]	+	-	endonuclease and 5'-3' exonuclease activity	Cytosolic
WP_012293094.1 MULTISPECIES: alpha-ketoacid dehydrogenase subunit beta [Lysinibacillus]	+	-	catalytic activity	Cytosolic
WP_012293121.1 MULTISPECIES: pyruvate carboxylase [Lysinibacillus]	+	-	catalyzes a 2-step reaction, involving the ATP-dependent carboxylation of the covalently attached biotin in the first step and the transfer of the carboxyl group to pyruvate in the second	Cytosolic
WP_012293129.1 MULTISPECIES: DUF420 domain-containing protein [Lysinibacillus]	+	-	unknown	Cytosolic
WP_012293147.1 MULTISPECIES: transcriptional regulator [Lysinibacillus]	+	-	regulation of gene expression through direct binding to cis-regulatory elements	Cytosolic
WP_012293148.1 MULTISPECIES: 2-dehydropantoate 2-reductase [Lysinibacillus]	+	-	Catalyzes the NADPH-dependent reduction of ketopantoate into pantoic acid.	Cytosolic
WP_012293150.1 MULTISPECIES: bacillithiol biosynthesis cysteine-adding enzyme BshC [Lysinibacillus]	+	-	Unknown	Unknown
WP_012293155.1 MULTISPECIES: stage V sporulation protein D [Lysinibacillus]	+	-	unknown catalytic activity	Membrane (Plasma)
WP_012293158.1 MULTISPECIES: putative lipid II flippase FtsW [Lysinibacillus]	+	-	cell division	Membrane
WP_012293172.1 MULTISPECIES: RNA-binding protein [Lysinibacillus]	+	-	Acts as a coactivator of transcriptional activity	Cytosolic
WP_012293186.1 MULTISPECIES: carbamoyl phosphate synthase small subunit [Lysinibacillus]	+	-	catalyses the hydrolysis of glutamine to ammonia, which in turn used by the large chain to synthesize carbamoyl phosphate	Cytosolic
WP_012293188.1 MULTISPECIES: dihydroorotate dehydrogenase electron transfer subunit [Lysinibacillus]	+	-	Responsible for channeling the electrons from the oxidation of dihydroorotate from the FMN redox center in the PyrD type B subunit to the ultimate electron acceptor NAD+	Membrane
WP_012293225.1 MULTISPECIES: L-serine ammonia-lyase, iron-sulfur-dependent, subunit alpha [Lysinibacillus]	+	-	L-serine ammonia-lyase activity	Cytosolic
WP_012293243.1 MULTISPECIES: signal recognition particle protein [Lysinibacillus]	+	-	targeting of signal peptide-bearing proteins to the prokaryotic plasma membrane or the eukaryotic endoplasmic reticulum membrane for secretion or membrane insertion	Cytosolic
WP_012293250.1 MULTISPECIES: EscU/YscU/HrcU family type III secretion system export apparatus switch protein [Lysinibacillus]	+	-	protein secretion	Membrane
WP_012293277.1 MULTISPECIES: flagellar type III secretion system protein FliR [Lysinibacillus]	+	-	bacterial-type flagellum assembly	Membrane (Plasma)
WP_012293293.1 MULTISPECIES: UMP kinase [Lysinibacillus]	+	-	Catalyzes the phosphorylation of pyrimidine nucleoside monophosphates at the expense of ATP	Cytosolic
WP_012293298.1 MULTISPECIES: RIP metalloprotease RseP [Lysinibacillus]	+	-	metalloendopeptidase activity	Membrane
WP_012293299.1 MULTISPECIES: proline--tRNA ligase [Lysinibacillus]	+	-	Catalyzes the attachment of proline to tRNA(Pro) in a two-step reaction: proline is first activated by ATP to form Pro-AMP and then transferred to the acceptor end of tRNA(Pro)	Cytosolic
WP_012293317.1 MULTISPECIES: 4-hydroxy-tetrahydrodipicolinate synthase [Lysinibacillus]	+	-	Catalyzes the condensation of (S)-aspartate-beta-semialdehyde [(S)-ASA] and pyruvate to 4-hydroxy-tetrahydrodipicolinate (HTPA).	Cytosolic
WP_012293325.1 MULTISPECIES: insulinase family protein [Lysinibacillus]	+	-	metal ion binding	Cytosolic
WP_012293342.1 MULTISPECIES: 2-oxoacid:acceptor oxidoreductase subunit alpha [Lysinibacillus]	+	-	oxidoreductase activity, acting on the aldehyde or oxo group of donors	Cytosolic
WP_012293346.1 MULTISPECIES: alkaline phosphatase family protein [Lysinibacillus]	+	-	phosphatase activity towards nucleotide phosphates with a preference for ATP	Cytosolic
WP_012293351.1 MULTISPECIES: histidinol phosphate phosphatase domain-containing protein [Lysinibacillus]	+	-	catalyzes the hydrolysis of L-histidinol phosphate to L-histidinol and inorganic phosphate,	Cytosolic
WP_012293387.1 MULTISPECIES: GNAT family N-acetyltransferase [Lysinibacillus]	+	-	catalyze the transfer of the acetyl from the CoA donor to a primary amine of the acceptor	Cytosolic
WP_012293392.1 MULTISPECIES: sensor histidine kinase [Lysinibacillus]	+	+	detect osmolarity and some hormones	Cytosolic
WP_012293406.1 MULTISPECIES: site-specific tyrosine recombinase XerD [Lysinibacillus]	+	-	catalyzing the cutting and rejoining of the recombining DNA molecules	Cytosolic
WP_012293419.1 MULTISPECIES: thiol-disulfide oxidoreductase ResA [Lysinibacillus]	+	-	disulfide reduction during c-type cytochrome synthesis	Cytosolic
WP_012293434.1 MULTISPECIES: DUF418 domain-containing protein [Lysinibacillus]	+	-	unknown	Cytosolic
WP_012293449.1 MULTISPECIES: guanine deaminase [Lysinibacillus]	+	-	Catalyzes the hydrolytic deamination of guanine, producing xanthine and ammonia.	Cytosolic
WP_012293452.1 MULTISPECIES: methyltransferase domain-containing protein [Lysinibacillus]	+	-	methylate histones on lysine	Cytosolic
WP_012293467.1 MULTISPECIES: DnaD domain protein [Lysinibacillus]	+	-	Probable component of primosome involved in the initiation of DNA replication.	Cytosolic
WP_012293479.1 MULTISPECIES: baseplate J/gp47 family protein [Lysinibacillus]	+	+	Component of the baseplate. Probably involved in tail assembly.	Membrane
WP_012293492.1 MULTISPECIES: Na/Pi cotransporter family protein [Lysinibacillus]	+	-	phosphate ion transmembrane transporter activity	Membrane
WP_012293567.1 MULTISPECIES: YitT family protein [Lysinibacillus]	+	-	Unknown	Membrane (Plasma)
WP_012293588.1 MULTISPECIES: methyl-accepting chemotaxis protein [Lysinibacillus]	+	-	reversible methylation during adaptation of bacterial cells to environmental attractants and repellents	Cytosolic
WP_012293609.1 MULTISPECIES: NAD(P)H-dependent glycerol-3-phosphate dehydrogenase [Lysinibacillus]	+	-	Catalytic activity	Cytosolic
WP_012293617.1 MULTISPECIES: heptaprenyl diphosphate synthase component 1 [Lysinibacillus]	+	-	Supplies heptaprenyl diphosphate, the precursor for the side chain of the isoprenoid quinone menaquinone-7 (MQ-7).	Membrane
WP_012293646.1 MULTISPECIES: histidinol-phosphate transaminase [Lysinibacillus]	+	-	transfer nitrogenous groups	Membrane
WP_012293669.1 MULTISPECIES: 5'-nucleotidase C-terminal domain-containing protein [Lysinibacillus]	+	-	hydrolase activity	Cytosolic
WP_012293684.1 MULTISPECIES: NAD-dependent dihydropyrimidine dehydrogenase subunit PreA [Lysinibacillus]	+	-	pyrimidine base degradation	Cytosolic
WP_012293715.1 MULTISPECIES: GHKL domain-containing protein [Lysinibacillus]	+	-	kinase activity	Membrane
WP_012293722.1 MULTISPECIES: TldD/PmbA family protein [Lysinibacillus]	+	-	metallopeptidase activity	Cytosolic
WP_012293723.1 MULTISPECIES: TldD/PmbA family protein [Lysinibacillus]	+	-	metallopeptidase activity	Cytosolic
WP_012293758.1 MULTISPECIES: class I SAM-dependent RNA methyltransferase [Lysinibacillus]	+	-	methyltransferase activity	Cytosolic
WP_012293767.1 MULTISPECIES: ethanolamine ammonia-lyase subunit EutC [Lysinibacillus]	+	-	Catalyzes the deamination of various vicinal amino-alcohols to oxo compounds. Allows this organism to utilize ethanolamine as the sole source of nitrogen and carbon in the presence of external vitamin B12.	Cytosolic
WP_012293776.1 MULTISPECIES: carboxypeptidase M32 [Lysinibacillus]	+	-	metallocarboxypeptidase activity	Cytosolic
WP_012293796.1 MULTISPECIES: ABC transporter ATP-binding protein [Lysinibacillus]	+	-	sn-glycerol-3-phosphate import & responsible for energy coupling to the transport system (Probable)	Membrane
WP_012293809.1 MULTISPECIES: methyl-accepting chemotaxis protein [Lysinibacillus]	+	-	reversible methylation during adaptation of bacterial cells to environmental attractants and repellents	Cytosolic
WP_012293828.1 MULTISPECIES: MarR family transcriptional regulator [Lysinibacillus]	+	+	control expression of bacterial proteins involved in metabolism, virulence, stress responses and multi-drug resistance	Cytosolic
WP_012293844.1 MULTISPECIES: SEC-C domain-containing protein [Lysinibacillus]	+	-	DNA binding	Cytosolic
WP_012293847.1 MULTISPECIES: general stress protein [Lysinibacillus]	+	-	Ribonucleoprotein, Ribosomal protein, RNA-binding, rRNA-binding	Cytosolic
WP_012293859.1 MULTISPECIES: hydantoinase/oxoprolinase family protein [Lysinibacillus]	+	+	hydrolase activity	Cytosolic
WP_012293865.1 MULTISPECIES: ABC-F family ATP-binding cassette domain-containing protein [Lysinibacillus]	+	-	ATP binding	Cytosolic
WP_012293877.1 MULTISPECIES: PucR family transcriptional regulator [Lysinibacillus]	+	-	regulation of expression of the genes of the purine catabolic pathway	Cytosolic
WP_012293884.1 MULTISPECIES: glutamate-5-semialdehyde dehydrogenase [Lysinibacillus]	+	-	Catalytic activity	Cytosolic
WP_012293901.1 MULTISPECIES: ABC transporter permease [Lysinibacillus]	+	-	translocation of an unknown substrate across the membrane	Membrane
WP_012293973.1 MULTISPECIES: iron ABC transporter permease [Lysinibacillus]	+	-	transmembrane transport	Membrane
WP_012293992.1 MULTISPECIES: ABC transporter ATP-binding protein [Lysinibacillus]	+	-	Responsible for energy coupling to the transport system (By similarity).	Membrane
WP_012294038.1 MULTISPECIES: class II fumarate hydratase [Lysinibacillus]	+	-	TCA cycle & catalyzes the stereospecific interconversion of fumarate to L-malate.	Cytosolic
WP_012294088.1 MULTISPECIES: histidine phosphatase family protein [Lysinibacillus]	+	-	metabolic regulations, intermediary metabolism and developmental processes	Cytosolic
WP_012294094.1 MULTISPECIES: ABC transporter ATP-binding protein/permease [Lysinibacillus]	+	-	Responsible for energy coupling to the transport system (By similarity).	Membrane
WP_012294116.1 MULTISPECIES: right-handed parallel beta-helix repeat-containing protein [Lysinibacillus]	+	-	Catalytic activity	Cytosolic
WP_012294158.1 MULTISPECIES: DMT family transporter [Lysinibacillus]	+	-	mediate efflux of a wide range of substrates, including sugars, metabolites, and toxins.	Membrane
WP_012294159.1 MULTISPECIES: bile acid:sodium symporter family protein [Lysinibacillus]	+	-	uptake of all types of bile acids from portal blood plasma	Cytosolic
WP_012294163.1 MULTISPECIES: oleate hydratase [Lysinibacillus]	+	-	cleave carbon-oxygen bonds	Membrane
WP_012294672.1 MULTISPECIES: DNA ligase D [Lysinibacillus]	+	-	DNA replication and repair in all organisms	Cytosolic
WP_012295111.1 MULTISPECIES: hypothetical protein [Lysinibacillus]	+	-	Unknown	Unknown
WP_012295137.1 MULTISPECIES: pentapeptide repeat-containing protein [Lysinibacillus]	+	-	encode the folding of a novel right-handed quadrilateral beta-helix	Cytosolic
WP_012295161.1 MULTISPECIES: Flp pilus assembly complex ATPase component TadA [Lysinibacillus]	+	-	ATP binding	Cytosolic
WP_012295162.1 MULTISPECIES: transcriptional regulator [Lysinibacillus]	+	-	regulation of gene expression through direct binding to cis-regulatory elements	Cytosolic
WP_012295163.1 MULTISPECIES: MBL fold metallo-hydrolase [Lysinibacillus]	+	-	biological functions	Cytosolic
WP_012295177.1 MULTISPECIES: phosphate ABC transporter ATP-binding protein PstB [Lysinibacillus]	+	-	energy coupling to the transport system.	Membrane
WP_012295214.1 MULTISPECIES: ABC transporter ATP-binding protein [Lysinibacillus]	+	-	sn-glycerol-3-phosphate import & responsible for energy coupling to the transport system (Probable)	Membrane
WP_012295223.1 MULTISPECIES: response regulator transcription factor [Lysinibacillus]	+	-	induce changes in gene expression in response to an external stimulus	Cytosolic
WP_012295234.1 MULTISPECIES: NAD(P)H-dependent oxidoreductase [Lysinibacillus]	+	-	catalyze the reduction or oxidation of a substrate coupled to the oxidation or reduction, respectively, of a nicotinamide adenine dinucleotide cofactor NAD(P)H or NAD(P)+	Cytosolic
WP_012295243.1 MULTISPECIES: DNA primase [Lysinibacillus]	+	-	catalyze the synthesis of short RNA molecules used as primers for DNA polymerases.	Cytosolic
WP_012295244.1 MULTISPECIES: glycine--tRNA ligase [Lysinibacillus]	+	-	Catalyzes the ATP-dependent ligation of glycine to the 3'-end of its cognate tRNA	Cytosolic
WP_012295253.1 MULTISPECIES: HD family phosphohydrolase [Lysinibacillus]	+	-	hydrolase activity	Cytosolic
WP_012295255.1 MULTISPECIES: sporulation protein YqfD [Lysinibacillus]	+	-	Unknown	Membrane
WP_012295257.1 MULTISPECIES: hypothetical protein [Lysinibacillus]	+	-	Unknown	Unknown
WP_012295274.1 MULTISPECIES: DNA (cytosine-5-)-methyltransferase [Lysinibacillus]	+	-	Catalytic activity	Cytosolic
WP_012295275.1 MULTISPECIES: hypothetical protein [Lysinibacillus]	+	-	Unknown	Unknown
WP_012295282.1 MULTISPECIES: bacteriophage regulatory protein [Lysinibacillus]	+	-	switch from lysogenic to lytic state and in fine-tuning the lytic phase activation	Cytosolic
WP_012295287.1 MULTISPECIES: phage major tail tube protein [Lysinibacillus]	+	-	Forms the virus tail tube.	Membrane
WP_012295295.1 MULTISPECIES: Clp protease ClpP [Lysinibacillus]	+	-	Cleaves peptides in various proteins in a process that requires ATP hydrolysis. Has a chymotrypsin-like activity	Cytosolic
WP_012295296.1 MULTISPECIES: phage portal protein [Lysinibacillus]	+	-	Forms the portal vertex of the capsid	Membrane
WP_012295330.1 MULTISPECIES: radical SAM family heme chaperone HemW [Lysinibacillus]	+	-	insertion of heme b into respiratory chain enzymes	Membrane
WP_012295331.1 MULTISPECIES: chromate efflux transporter [Lysinibacillus]	+	-	efflux	Membrane
WP_012295336.1 MULTISPECIES: methyl-accepting chemotaxis protein [Lysinibacillus]	+	-	mediates taxis to the attractant maltose via an interaction with the periplasmic maltose binding protein	Membrane (Plasma)
WP_012295342.1 MULTISPECIES: GNAT family N-acetyltransferase [Lysinibacillus]	+	-	catalyze the transfer of the acetyl from the CoA donor to a primary amine of the acceptor.	Cytosolic
WP_012295365.1 MULTISPECIES: 30S ribosomal protein S20 [Lysinibacillus]	+	-	Binds directly to 16S ribosomal RNA.	Cytosolic
WP_012295386.1 MULTISPECIES: U32 family peptidase [Lysinibacillus]	+	-	organic substance metabolic process	Cytosolic
WP_012295396.1 MULTISPECIES: magnesium/cobalt transporter CorA [Lysinibacillus]	+	-	Mediates influx of magnesium ions	Cytosolic
WP_012295399.1 MULTISPECIES: phosphoribosylformimino-5-aminoimidazole carboxamide ribotide isomerase [Lysinibacillus]	+	-	dihydroorotate dehydrogenase activity	Cytosolic
WP_012295401.1 MULTISPECIES: GTP pyrophosphokinase family protein [Lysinibacillus]	+	-	GTP diphosphokinase activity	Cytosolic
WP_012295420.1 MULTISPECIES: N-acetylmuramoyl-L-alanine amidase [Lysinibacillus]	+	-	hydrolyzes the amide bond between N-acetylmuramic acid and L-alanine in cell-wall glycopeptides	Cytosolic
WP_012295422.1 MULTISPECIES: hypothetical protein [Lysinibacillus]	+	-	Unknown	Unknown
WP_012295447.1 MULTISPECIES: preprotein translocase subunit YajC [Lysinibacillus]	+	-	interacts with membrane protein SecD and SecF to coordinate protein transport and secretion across cytoplasmic membrane in Escherichia coli	Membrane
WP_012295480.1 MULTISPECIES: porphobilinogen synthase [Lysinibacillus]	+	-	Catalyzes an early step in the biosynthesis of tetrapyrroles. Binds two molecules of 5-aminolevulinate per subunit, each at a distinct site, and catalyzes their condensation to form porphobilinogen.	Cytosolic
WP_012295566.1 MULTISPECIES: excinuclease ABC subunit UvrC [Lysinibacillus]	+	-	excinuclease ABC activity	Cytosolic
WP_012295578.1 MULTISPECIES: phenylalanine--tRNA ligase subunit beta [Lysinibacillus]	+	-	Catalytic activity	Cytosolic
WP_012295579.1 MULTISPECIES: phenylalanine--tRNA ligase subunit alpha [Lysinibacillus]	+	-	Catalytic activity	Cytosolic
WP_012295584.1 MULTISPECIES: FAD-binding oxidoreductase [Lysinibacillus]	+	-	FAD binding	Cytosolic
WP_012295593.1 MULTISPECIES: transporter substrate-binding domain-containing protein [Lysinibacillus]	+	-	determinant of the substrate specificity and high affinity of ABC uptake systems in these organisms.	Membrane
WP_012295609.1 MULTISPECIES: DNA polymerase I [Lysinibacillus]	+	-	add new nucleotides to the 3' end of a growing chain	Cytosolic
WP_012295634.1 MULTISPECIES: class I SAM-dependent methyltransferase [Lysinibacillus]	+	-	methyltransferase activity	Membrane
WP_012295643.1 MULTISPECIES: tRNA 4-thiouridine(8) synthase ThiI [Lysinibacillus]	+	-	Catalyzes the ATP-dependent transfer of a sulfur to tRNA to produce 4-thiouridine in position 8 of tRNAs	Cytosolic
WP_012295646.1 MULTISPECIES: septation ring formation regulator EzrA [Lysinibacillus]	+	-	Negative regulator of FtsZ ring formation; modulates the frequency and position of FtsZ ring formation. Inhibits FtsZ ring formation at polar sites. Interacts either with FtsZ or with one of its binding partners to promote depolymerization.	Cytosolic
WP_012295667.1 MULTISPECIES: site-specific integrase [Lysinibacillus]	+	+	genetic recombination in which DNA strand exchange takes place between segments possessing at least a certain degree of sequence homology	Cytosolic
WP_012295678.1 MULTISPECIES: iron-containing alcohol dehydrogenase [Lysinibacillus]	+	-	metabolism of fucose	Cytosolic
WP_012295681.1 MULTISPECIES: penicillin-binding protein [Lysinibacillus]	+	-	polymerize and modify peptidoglycan, the stress-bearing component of the bacterial cell wall	Membrane
WP_012295691.1 MULTISPECIES: catabolite control protein A [Lysinibacillus]	+	-	Global transcriptional regulator of carbon catabolite repression (CCR) and carbon catabolite activation (CCA)	Cytosolic
WP_012295698.1 MULTISPECIES: DUF4479 domain-containing tRNA-binding protein [Lysinibacillus]	+	-	tRNA binding	Cytosolic
WP_012295709.1 MULTISPECIES: D-amino-acid transaminase [Lysinibacillus]	+	-	catalyzes the chemical reaction: D-alanine + 2-oxoglutarate. pyruvate + D-glutamate.	Cytosolic
WP_012295713.1 MULTISPECIES: rRNA pseudouridine synthase [Lysinibacillus]	+	-	stabilize required RNA conformations that would otherwise be too flexible	Cytosolic
WP_012295721.1 MULTISPECIES: amidohydrolase family protein [Lysinibacillus]	+	-	hydrolase activity	Cytosolic
WP_012295728.1 MULTISPECIES: response regulator [Lysinibacillus]	+	-	response regulator involved in His-to-Asp phosphorelay signal transduction system	Cytosolic
WP_012295733.1 MULTISPECIES: metalloregulator ArsR/SmtB family transcription factor [Lysinibacillus]	+	-	represses the expression of operons linked to stress-inducing concentrations of di- and multivalent heavy metal ions	Cytosolic
WP_012295754.1 MULTISPECIES: amidohydrolase [Lysinibacillus]	+	+	acts upon amide bonds	Cytosolic
WP_012295776.1 MULTISPECIES: L-aspartate oxidase [Lysinibacillus]	+	-	Catalyzes the oxidation of L-aspartate to iminoaspartate, the first step in the de novo biosynthesis of NAD+	Cytosolic
WP_012295782.1 MULTISPECIES: RNA polymerase sigma factor SigB [Lysinibacillus]	+	-	Sigma factors are initiation factors that promote the attachment of RNA polymerase (RNAP) to specific initiation sites and are then released	Cytosolic
WP_012295848.1 MULTISPECIES: sodium/proline symporter PutP [Lysinibacillus]	+	-	Catalyzes the sodium-dependent uptake of extracellular L-proline. This protein is also capable of using lithium as the transport cation. Also catalyzes the uptake of propionate.	Cytosolic
WP_012295849.1 MULTISPECIES: SAM-dependent methyltransferase [Lysinibacillus]	+	-	methyltransferase activity	Membrane
WP_012295854.1 MULTISPECIES: MMPL family transporter [Lysinibacillus]	+	-	translocate complex, virulence-associated envelope lipids and siderophores across the plasma membrane to the periplasmic space	Membrane
WP_012295880.1 MULTISPECIES: c-type cytochrome [Lysinibacillus]	+	-	carry electrons from one complex of integral membrane proteins of the inner mitochondrial membrane to another	Membrane
WP_012295881.1 MULTISPECIES: DsbA family oxidoreductase [Lysinibacillus]	+	-	catalyzes intrachain disulfide bond formation as peptides emerge into the cell's periplasm.	Cytosolic
WP_012295888.1 MULTISPECIES: rhodanese-like domain-containing protein [Lysinibacillus]	+	-	anchoring ferredoxin--NADP reductase to the thylakoid membranes and sustaining efficient linear electron flow (LEF).	Cytosolic
WP_012295897.1 MULTISPECIES: methyl-accepting chemotaxis protein [Lysinibacillus]	+	-	reversible methylation during adaptation of bacterial cells to environmental attractants and repellents	Cytosolic
WP_012295905.1 MULTISPECIES: isoprenylcysteine carboxyl methyltransferase family protein [Lysinibacillus]	+	-	methyltransferase activity	Cytosolic
WP_012295980.1 MULTISPECIES: NAD(P)H-dependent oxidoreductase [Lysinibacillus]	+	-	catalyze the reduction or oxidation of a substrate coupled to the oxidation or reduction, respectively, of a nicotinamide adenine dinucleotide cofactor NAD(P)H or NAD(P)+	Cytosolic
WP_012296047.1 MULTISPECIES: tRNA pseudouridine(38-40) synthase TruA [Lysinibacillus]	+	-	Formation of pseudouridine at positions 38, 39 and 40 in the anticodon stem and loop of transfer RNAs.	Cytosolic
WP_012296051.1 MULTISPECIES: 50S ribosomal protein L17 [Lysinibacillus]	+	-	Requires L15 for assembly into the 50S subunit.	Cytosolic
WP_012296086.1 MULTISPECIES: 23S rRNA (guanosine(2251)-2'-O)-methyltransferase RlmB [Lysinibacillus]	+	-	Specifically methylates the ribose of guanosine 2251 in 23S rRNA.	Cytosolic
WP_012296093.1 MULTISPECIES: DNA repair protein RadA [Lysinibacillus]	+	-	repairing DNA breaks	Cytosolic
WP_012296135.1 MULTISPECIES: VOC family protein [Lysinibacillus]	+	+	dioxygenase activity	Cytosolic
WP_012296137.1 MULTISPECIES: methyl-accepting chemotaxis protein [Lysinibacillus]	+	-	methyl-accepting chemotaxis protein	Cytosolic
WP_012296147.1 MULTISPECIES: M14 family metallopeptidase [Lysinibacillus]	+	-	metallocarboxypeptidase activity	Cytosolic
WP_012296155.1 MULTISPECIES: malate:quinone oxidoreductase [Lysinibacillus]	+	-	Catalytic activity	Cytosolic
WP_012296163.1 MULTISPECIES: GntP family permease [Lysinibacillus]	+	-	gluconate transmembrane transporter activity	Membrane (Plasma)
WP_012296164.1 MULTISPECIES: decarboxylating NADP(+)-dependent phosphogluconate dehydrogenase [Lysinibacillus]	+	-	Catalyzes the oxidative decarboxylation of 6-phosphogluconate to ribulose 5-phosphate and CO2, with concomitant reduction of NADP to NADPH. Is the predominant 6-P-gluconate dehydrogenase isoenzyme in B.subtilis during growth on glucose and gluconate.	Cytosolic
WP_012296165.1 MULTISPECIES: diguanylate cyclase [Lysinibacillus]	+	-	formation of the ubiquitous second messenger, cyclic-di-GMP, involved in bacterial biofilm formation and persistence	Cytosolic
WP_012296182.1 MULTISPECIES: PLP-dependent aminotransferase family protein [Lysinibacillus]	+	-	DNA-binding transcription factor activity	Cytosolic
WP_012296214.1 MULTISPECIES: acyl-CoA dehydrogenase [Lysinibacillus]	+	-	catalyze the first step of mitochondrial fatty acid beta-oxidation	Cytosolic
WP_024363689.1 MULTISPECIES: isochorismate synthase [Lysinibacillus]	+	-	Isochorismate synthase involved in the synthesis of salicylic acid (SA) required for both local and systemic acquired resistance (LAR and SAR) while SA synthesized through the phenylalanine ammonium lyase (PAL) pathway seems to potentiate plant cell death. Also involved in phylloquinone (vitamin K1) synthesis. Has no isochorismate pyruvate lyase (IPL) activity.	Cytosolic
WP_025115432.1 MULTISPECIES: RsfA family transcriptional regulator [Lysinibacillus]	+	-	Unknown	Unknown
WP_025115837.1 MULTISPECIES: DUF402 domain-containing protein [Lysinibacillus]	+	-	unknown	Cytosolic
WP_031415837.1 MULTISPECIES: mechanosensitive ion channel family protein [Lysinibacillus]	+	-	respond to membrane tension by altering their conformation between an open state and a closed state	Membrane
WP_031415896.1 MULTISPECIES: diphthine--ammonia ligase [Lysinibacillus]	+	-	Amidase that catalyzes the last step of diphthamide biosynthesis using ammonium and ATP. Diphthamide biosynthesis consists in the conversion of an L-histidine residue in the translation elongation factor eEF-2 (EFT1 or EFT2) to diphthamide.	Cytosolic
WP_031416173.1 MULTISPECIES: MogA/MoaB family molybdenum cofactor biosynthesis protein [Lysinibacillus]	+	-	Mo-molybdopterin cofactor biosynthetic process	Cytosolic
WP_031416324.1 MULTISPECIES: CPBP family intramembrane metalloprotease [Lysinibacillus]	+	-	metalloendopeptidase activity	Membrane
WP_031416357.1 MULTISPECIES: bifunctional homocysteine S-methyltransferase/methylenetetrahydrofolate reductase [Lysinibacillus]	+	-	Catalytic activity	Cytosolic
WP_031416420.1 MULTISPECIES: ornithine carbamoyltransferase [Lysinibacillus]	+	-	Catalyzes the second step of the urea cycle, the condensation of carbamoyl phosphate with L-ornithine to form L-citrulline	Cytosolic
WP_031416433.1 MULTISPECIES: NCS2 family permease [Lysinibacillus]	+	-	nucleobase transmembrane transporter activity	Membrane
WP_031416459.1 MULTISPECIES: isochorismate synthase [Lysinibacillus]	+	-	Isochorismate synthase involved in the synthesis of salicylic acid (SA) required for both local and systemic acquired resistance (LAR and SAR) while SA synthesized through the phenylalanine ammonium lyase (PAL) pathway seems to potentiate plant cell death. Also involved in phylloquinone (vitamin K1) synthesis. Has no isochorismate pyruvate lyase (IPL) activity.	Cytosolic
WP_031416725.1 MULTISPECIES: DNA-directed RNA polymerase subunit beta [Lysinibacillus]	+	-	DNA-dependent RNA polymerase (RNAP) catalyzes the transcription of DNA into RNA using the four ribonucleoside triphosphates as substrates.	Cytosolic
WP_031416796.1 MULTISPECIES: heptaprenylglyceryl phosphate synthase [Lysinibacillus]	+	-	Catalytic activity	Cytosolic
WP_031417022.1 MULTISPECIES: tRNA (adenine(22)-N(1))-methyltransferase TrmK [Lysinibacillus]	+	-	Catalyzes the S-adenosyl-L-methionine-dependent formation of N1-methyladenine at position 22 (m1A22) in tRNA.	Cytosolic
WP_031417064.1 MULTISPECIES: VOC family protein [Lysinibacillus]	+	+	dioxygenase activity	Cytosolic
WP_031417420.1 MULTISPECIES: glycerophosphodiester phosphodiesterase [Lysinibacillus]	+	+	Hydrolyzes glycerolphosphoglycerol, glycerophosphocholine and glycerophosphoethanolamine in vitro.	Membrane (Plasma)
WP_031417479.1 MULTISPECIES: energy-coupling factor ABC transporter permease [Lysinibacillus]	+	-	representing one of the crucial and the largest family in the fungal genomes	Membrane
WP_031417498.1 MULTISPECIES: uroporphyrinogen-III C-methyltransferase [Lysinibacillus]	+	-	Catalyzes the two successive C-2 and C-7 methylation reactions involved in the conversion of uroporphyrinogen III to precorrin-2 via the intermediate formation of precorrin-1	Cytosolic
WP_031417701.1 MULTISPECIES: bifunctional metallophosphatase/5'-nucleotidase [Lysinibacillus]	+	-	hydrolase activity	Cytosolic
WP_031417817.1 MULTISPECIES: response regulator transcription factor [Lysinibacillus]	+	-	response regulator transcription factor	Cytosolic
WP_031417856.1 MULTISPECIES: GNAT family N-acetyltransferase [Lysinibacillus]	+	-	catalyze the transfer of the acetyl from the CoA donor to a primary amine of the acceptor.	Cytosolic
WP_031417906.1 MULTISPECIES: YdcF family protein [Lysinibacillus]	+	-	Binds S-adenosyl-L-methionine (AdoMet).	Membrane (Plasma)
WP_031417987.1 MULTISPECIES: ubiquinol-cytochrome c reductase iron-sulfur subunit [Lysinibacillus]	+	-	Component of the ubiquinol-cytochrome c reductase complex (complex III or cytochrome b-c1 complex)	Cytosolic
WP_031418022.1 MULTISPECIES: SafA/ExsA family spore coat assembly protein [Lysinibacillus]	+	-	Unknown	Unknown
WP_031418055.1 MULTISPECIES: DUF5050 domain-containing protein [Lysinibacillus]	+	-	unknown	Cytosolic
WP_031418406.1 MULTISPECIES: acyl-CoA dehydrogenase [Lysinibacillus]	+	+	Catalytic activity	Cytosolic
WP_031418434.1 MULTISPECIES: tryptophan synthase subunit beta [Lysinibacillus]	+	-	The beta subunit is responsible for the synthesis of L-tryptophan from indole and L-serine.	Cytosolic
WP_031418479.1 MULTISPECIES: heterodisulfide reductase-related iron-sulfur binding cluster [Lysinibacillus]	+	-	Part of a complex that catalyzes the reversible reduction of CoM-S-S-CoB to the thiol-coenzymes H-S-CoM (coenzyme M) and H-S-CoB (coenzyme B).	Cytosolic
WP_031418485.1 MULTISPECIES: DNA-directed RNA polymerase subunit delta [Lysinibacillus]	+	-	Participates in both the initiation and recycling phases of transcription	Cytosolic
WP_031418489.1 MULTISPECIES: UDP-N-acetylglucosamine 1-carboxyvinyltransferase [Lysinibacillus]	+	-	Cell wall formation	Membrane
WP_031418618.1 MULTISPECIES: alanine dehydrogenase [Lysinibacillus]	+	-	Catalyzes the reversible oxidative deamination of L-alanine to pyruvate. Oxidative deamination proceeds through a sequential, ordered ternary-binary mechanism, where NAD+ binds first followed by L-alanine; the products are released in the order ammonia, pyruvate and NADH	Cytosolic
WP_031418629.1 MULTISPECIES: NADP-dependent isocitrate dehydrogenase [Lysinibacillus]	+	-	catalyze the oxidative decarboxylation of isocitrate to alpha-ketoglutarate	Cytosolic
WP_031418655.1 MULTISPECIES: RraA family protein [Lysinibacillus]	+	-	Globally modulates RNA abundance by binding to RNase E (Rne) and regulating its endonucleolytic activity.	Cytosolic
WP_031418785.1 MULTISPECIES: glycine betaine ABC transporter substrate-binding protein [Lysinibacillus]	+	-	transmembrane transporter activity	Membrane
WP_031418807.1 MULTISPECIES: UDP-N-acetylmuramoyl-L-alanyl-D-glutamate--2,6-diaminopimelate ligase [Lysinibacillus]	+	-	catalyzes a reaction in the cytoplasmic step of peptidoglycan biosynthesis by adding the third amino acid residue to the peptide stem	Cytosolic
WP_031418910.1 MULTISPECIES: YceD family protein [Lysinibacillus]	+	-	Plays a role in synthesis, processing and/or stability of 23S rRNA.	Cytosolic
WP_031419015.1 MULTISPECIES: CDP-diacylglycerol--glycerol-3-phosphate 3-phosphatidyltransferase [Lysinibacillus]	+	-	This protein catalyzes the committed step to the synthesis of the acidic phospholipids.	Cytosolic
WP_031419090.1 MULTISPECIES: cell wall-active antibiotics response protein LiaF [Lysinibacillus]	+	-	liaRS transcription	Membrane
WP_031419281.1 MULTISPECIES: phosphoribosylanthranilate isomerase [Lysinibacillus]	+	-	Catalytic activity	Cytosolic
WP_031419310.1 MULTISPECIES: cytochrome c biogenesis protein CcsA [Lysinibacillus]	+	-	Required during biogenesis of c-type cytochromes (cytochrome c6 and cytochrome f) at the step of heme attachment	Cytosolic
WP_031419316.1 MULTISPECIES: endopeptidase La [Lysinibacillus]	+	-	Hydrolysis of proteins in presence of ATP.	Cytosolic
WP_031419589.1 MULTISPECIES: lactate utilization protein C [Lysinibacillus]	+	-	Is essential for L-lactate degradation and allows cells to grow with lactate as the sole carbon source	Cytosolic
WP_031419598.1 MULTISPECIES: DUF1659 domain-containing protein [Lysinibacillus]	+	-	Unknown	Unknown
WP_031419624.1 MULTISPECIES: glucosaminidase domain-containing protein [Lysinibacillus]	+	-	beta-N-acetylhexosaminidase activity	Cytosolic
WP_031419674.1 MULTISPECIES: DUF3986 family protein [Lysinibacillus]	+	-	Unknown	Unknown
WP_031419709.1 MULTISPECIES: translation elongation factor 4 [Lysinibacillus]	+	-	catalyze the back-translocation reaction on posttranslocation state ribosomes	Cytosolic
WP_031419759.1 MULTISPECIES: stalk domain-containing protein [Lysinibacillus]	+	-	replication-dependent translation of histone mRNAs which differ from other eukaryotic mRNAs in that they do not end with a poly-A tail but a stem-loop	Cytosolic
WP_031419892.1 MULTISPECIES: (4Fe-4S)-binding protein [Lysinibacillus]	+	-	enzyme cofactors	Cytosolic
WP_036075119.1 MULTISPECIES: phage portal protein [Lysinibacillus]	+	-	Forms the portal vertex of the capsid.	Membrane
WP_036075467.1 MULTISPECIES: chaperonin GroEL [Lysinibacillus]	+	-	assisting protein folding	Cytosolic
WP_036119560.1 MULTISPECIES: DRTGG domain-containing protein [Lysinibacillus]	+	-	describes the position of regions of compositional bias within the protein	Cytosolic
WP_036121380.1 MULTISPECIES: riboflavin biosynthesis protein RibF [Lysinibacillus]	+	-	binding site that allows ATP molecule to interact. This binding sites is a micro-environment where ATP is captured and hydrolyzed to ADP, releasing energy which is utilized by the protein	Cytosolic
WP_036122138.1 MULTISPECIES: YbaB/EbfC family nucleoid-associated protein [Lysinibacillus]	+	-	DNA binding	Cytosolic
WP_036122959.1 MULTISPECIES: arginine--tRNA ligase [Lysinibacillus]	+	-	catalyzes the attachment of specific amino acids to cognate tRNAs during protein synthesis	Cytosolic
WP_036125168.1 MULTISPECIES: isoleucine--tRNA ligase [Lysinibacillus]	+	-	catalyzes the attachment of specific amino acids to cognate tRNAs during protein synthesis	Cytosolic
WP_036126679.1 MULTISPECIES: tryptophan--tRNA ligase [Lysinibacillus]	+	-	catalyzes the attachment of specific amino acids to cognate tRNAs during protein synthesis	Cytosolic
WP_036160354.1 MULTISPECIES: ATP-dependent zinc metalloprotease FtsH [Lysinibacillus]	+	-	Acts as a processive, ATP-dependent zinc metallopeptidase for both cytoplasmic and membrane proteins. Plays a role in the quality control of integral membrane proteins.	Cytosolic
WP_036160363.1 MULTISPECIES: FAD-binding oxidoreductase [Lysinibacillus]	+	-	FAD binding	Cytosolic
WP_036160378.1 MULTISPECIES: ABC-F type ribosomal protection protein [Lysinibacillus]	+	-	ATP binding	Cytosolic
WP_036160442.1 MULTISPECIES: SGNH/GDSL hydrolase family protein [Lysinibacillus]	+	-	carboxylic ester hydrolase activity	Cytosolic
WP_036160521.1 MULTISPECIES: Dam family site-specific DNA-(adenine-N6)-methyltransferase [Lysinibacillus]	+	-	Catalytic activity	Cytosolic
WP_036160542.1 MULTISPECIES: GNAT family N-acetyltransferase [Lysinibacillus]	+	-	aminoglycoside antibiotic resistance, transcription regulation, protein acetylation and stress reaction	Cytosolic
WP_036160583.1 MULTISPECIES: HAMP domain-containing histidine kinase [Lysinibacillus]	+	-	signal transduction	Membrane
WP_036160608.1 MULTISPECIES: methyl-accepting chemotaxis protein [Lysinibacillus]	+	-	reversible methylation during adaptation of bacterial cells to environmental attractants and repellents	Cytosolic
WP_036160800.1 MULTISPECIES: DUF2268 domain-containing putative Zn-dependent protease [Lysinibacillus]	+	-	Unknown	Unknown
WP_036160867.1 MULTISPECIES: VOC family protein [Lysinibacillus]	+	+	dioxygenase activity	Cytosolic
WP_036160873.1 MULTISPECIES: SDR family oxidoreductase [Lysinibacillus]	+	+	catalyzing the redox of the hydroxyl/ketone group of the hormone.	Cytosolic
WP_036160900.1 MULTISPECIES: GNAT family N-acetyltransferase [Lysinibacillus]	+	-	aminoglycoside antibiotic resistance, transcription regulation, protein acetylation and stress reaction	Cytosolic
WP_036160903.1 MULTISPECIES: sensor histidine kinase [Lysinibacillus]	+	+	detect osmolarity and some hormones	Cytosolic
WP_036161026.1 MULTISPECIES: substrate-binding domain-containing protein [Lysinibacillus]	+	-	determinant of the substrate specificity and high affinity of ABC uptake systems in these organisms.	Membrane
WP_036161073.1 MULTISPECIES: response regulator transcription factor [Lysinibacillus]	+	-	response regulator transcription factor	Cytosolic
WP_036161093.1 MULTISPECIES: acryloyl-CoA reductase [Lysinibacillus]	+	-	electron transfer activity	Membrane
WP_036161132.1 MULTISPECIES: GNAT family N-acetyltransferase [Lysinibacillus]	+	-	aminoglycoside antibiotic resistance, transcription regulation, protein acetylation and stress reaction	Cytosolic
WP_036161149.1 MULTISPECIES: LysM peptidoglycan-binding domain-containing protein [Lysinibacillus]	+	-	chitin-binding	Cytosolic
WP_036161200.1 MULTISPECIES: ABC-F type ribosomal protection protein [Lysinibacillus]	+	-	ATP binding	Cytosolic
WP_036161224.1 MULTISPECIES: DnaD domain-containing protein [Lysinibacillus]	+	-	overall role of a protein	Cytosolic
WP_036161280.1 MULTISPECIES: ABC transporter ATP-binding protein [Lysinibacillus]	+	-	sn-glycerol-3-phosphate import & responsible for energy coupling to the transport system (Probable)	Membrane
WP_036161284.1 MULTISPECIES: toxic anion resistance protein [Lysinibacillus]	+	-	tellurite resistance	Cytosolic
WP_036161316.1 MULTISPECIES: HAMP domain-containing histidine kinase [Lysinibacillus]	+	-	signal transduction	Membrane
WP_036161318.1 MULTISPECIES: response regulator transcription factor [Lysinibacillus]	+	-	response regulator transcription factor	Cytosolic
WP_036161340.1 MULTISPECIES: hypothetical protein [Lysinibacillus]	+	-	Unknown	Unknown
WP_036161424.1 MULTISPECIES: DnaD domain protein [Lysinibacillus]	+	-	ATP binding	Cytosolic
WP_036161492.1 MULTISPECIES: Ger(x)C family spore germination protein [Lysinibacillus]	+	+	spore germination	Cytosolic
WP_036161510.1 MULTISPECIES: arsenate reductase (thioredoxin) [Lysinibacillus]	+	-	arsenate reductase (thioredoxin) activity	Cytosolic
WP_036161535.1 MULTISPECIES: FMN-binding negative transcriptional regulator [Lysinibacillus]	+	-	CTP-dependent riboflavin kinase in the archaeal flavin synthesis pathway	Cytosolic
WP_036161568.1 MULTISPECIES: S9 family peptidase [Lysinibacillus]	+	-	serine-type peptidase activity	Cytosolic
WP_036161614.1 MULTISPECIES: 3-hydroxyacyl-ACP dehydratase FabZ [Lysinibacillus]	+	-	Catalyzes the dehydration of short chain beta-hydroxyacyl-ACPs and long chain saturated and unsaturated beta-hydroxyacyl-ACPs	Cytosolic
WP_036161681.1 MULTISPECIES: Ger(x)C family spore germination protein [Lysinibacillus]	+	+	spore germination	Cytosolic
WP_036161696.1 MULTISPECIES: carbamate kinase [Lysinibacillus]	+	-	Catalytic activity	Cytosolic
WP_036161697.1 MULTISPECIES: nitroreductase family protein [Lysinibacillus]	+	-	reduction of nitrogen-containing compounds	Cytosolic
WP_036161718.1 MULTISPECIES: DNA-3-methyladenine glycosylase [Lysinibacillus]	+	-	Hydrolysis of the deoxyribose N-glycosidic bond to excise 3-methyladenine, and 7-methylguanine from the damaged DNA polymer formed by alkylation lesions.	Cytosolic
WP_036161726.1 MULTISPECIES: Hsp33 family molecular chaperone HslO [Lysinibacillus]	+	-	identical protein binding	Cytosolic
WP_036161754.1 MULTISPECIES: DUF4085 family protein [Lysinibacillus]	+	-	Unknown	Unknown
WP_036161772.1 MULTISPECIES: TatD family hydrolase [Lysinibacillus]	+	-	deoxyribonuclease activity	Cytosolic
WP_036161794.1 MULTISPECIES: oxalate decarboxylase family bicupin [Lysinibacillus]	+	-	Binds 2 manganese ions per subunit	Cytosolic
WP_036161829.1 MULTISPECIES: 7-carboxy-7-deazaguanine synthase QueE [Lysinibacillus]	+	-	Catalyzes the complex heterocyclic radical-mediated conversion of 6-carboxy-5,6,7,8-tetrahydropterin (CPH4) to 7-carboxy-7-deazaguanine (CDG), a step common to the biosynthetic pathways of all 7-deazapurine-containing compounds.	Cytosolic
WP_036161991.1 MULTISPECIES: MFS transporter [Lysinibacillus]	+	+	facilitate movement of small solutes across cell membranes in response to chemiosmotic gradients.	Cytosolic
WP_036162023.1 MULTISPECIES: ABC transporter ATP-binding protein/permease [Lysinibacillus]	+	-	Responsible for energy coupling to the transport system (By similarity).	Membrane
WP_036162045.1 MULTISPECIES: S8 family serine peptidase [Lysinibacillus]	+	-	serine-type endopeptidase activity	Membrane
WP_036162046.1 MULTISPECIES: glycosyltransferase [Lysinibacillus]	+	-	catalyze the synthesis of glycosidic linkages by the transfer of a sugar residue from a donor substrate to an acceptor	Cytosolic
WP_036162077.1 MULTISPECIES: alpha/beta hydrolase [Lysinibacillus]	+	-	Hydrolase activity	Cytosolic
WP_036162138.1 MULTISPECIES: diguanylate cyclase [Lysinibacillus]	+	-	formation of the ubiquitous second messenger, cyclic-di-GMP, involved in bacterial biofilm formation and persistence	Cytosolic
WP_036162184.1 MULTISPECIES: DUF6148 family protein [Lysinibacillus]	+	-	Unknown	Unknown
WP_036162327.1 MULTISPECIES: DMT family transporter [Lysinibacillus]	+	-	mediate efflux of a wide range of substrates, including sugars, metabolites, and toxins.	Membrane
WP_036162372.1 MULTISPECIES: M3 family oligoendopeptidase [Lysinibacillus]	+	-	metal ion binding	Membrane
WP_036162376.1 MULTISPECIES: methyl-accepting chemotaxis protein [Lysinibacillus]	+	-	reversible methylation during adaptation of bacterial cells to environmental attractants and repellents	Cytosolic
WP_036162416.1 MULTISPECIES: DUF4272 domain-containing protein [Lysinibacillus]	+	-	Unknown	Unknown
WP_036162422.1 MULTISPECIES: D-alanine--D-alanine ligase [Lysinibacillus]	+	-	Cell wall formation.	Membrane
WP_036162483.1 MULTISPECIES: DUF4263 domain-containing protein [Lysinibacillus]	+	-	Unknown	Unknown
WP_036162490.1 MULTISPECIES: peptidoglycan DD-metalloendopeptidase family protein [Lysinibacillus]	+	-	metalloendopeptidase activity	Membrane
WP_036162492.1 MULTISPECIES: DHH family phosphoesterase [Lysinibacillus]	+	-	nucleic acid binding	Cytosolic
WP_036162511.1 MULTISPECIES: 23S rRNA (uracil(1939)-C(5))-methyltransferase RlmD [Lysinibacillus]	+	-	Catalyzes the formation of 5-methyl-uridine at position 1939 (m5U1939) in 23S rRNA	Cytosolic
WP_036162649.1 MULTISPECIES: VanW family protein [Lysinibacillus]	+	-	ATP binding	Cytosolic
WP_036162843.1 MULTISPECIES: glycosyltransferase [Lysinibacillus]	+	-	catalyze the synthesis of glycosidic linkages by the transfer of a sugar residue from a donor substrate to an acceptor	Cytosolic
WP_036162896.1 MULTISPECIES: amino acid permease [Lysinibacillus]	+	-	transport of amino acids into the cell	Membrane
WP_036196570.1 MULTISPECIES: helix-turn-helix domain-containing protein [Lysinibacillus]	+	-	DNA Regulation	Cytosolic (Nucleus)
WP_036225403.1 MULTISPECIES: nucleoside deaminase [Lysinibacillus]	+	-	maintains the cellular pyrimidine supply	Membrane
WP_051563316.1 MULTISPECIES: glycosyltransferase family 4 protein [Lysinibacillus]	+	-	catalyze the synthesis of glycosidic linkages by the transfer of a sugar residue from a donor substrate to an acceptor	Cytosolic
WP_051563353.1 MULTISPECIES: thiamine phosphate synthase [Lysinibacillus]	+	-	catalyzes the coupling of carboxythiazole phosphate and hydroxymethyl pyrimidine pyrophosphate to give thiamin monophosphate	Cytosolic
WP_053596416.1 MULTISPECIES: stalk domain-containing protein [Lysinibacillus]	+	-	replication-dependent translation of histone mRNAs which differ from other eukaryotic mRNAs in that they do not end with a poly-A tail but a stem-loop	Cytosolic
WP_054549978.1 MULTISPECIES: endonuclease MutS2 [Lysinibacillus]	+	-	control of bacterial genetic diversity (Probable). Also involved in repairing oxidative DNA damage. Has ATPase activity	Cytosolic
WP_058843384.1 MULTISPECIES: pyruvate kinase [Lysinibacillus]	+	-	catalyzes the conversion of phosphoenolpyruvate and ADP to pyruvate and ATP in glycolysis and plays a role in regulating cell metabolism	Cytosolic
WP_068983754.1 MULTISPECIES: tRNA preQ1(34) S-adenosylmethionine ribosyltransferase-isomerase QueA [Lysinibacillus]	+	-	regulatory	Cytosolic
WP_068983953.1 MULTISPECIES: dephospho-CoA kinase [Lysinibacillus]	+	-	catalyzes the ATP-dependent phosphorylation of dephospho-CoA,	Cytosolic
WP_068986884.1 MULTISPECIES: isochorismate synthase [Lysinibacillus]	+	-	Isochorismate synthase involved in the synthesis of salicylic acid (SA) required for both local and systemic acquired resistance (LAR and SAR) while SA synthesized through the phenylalanine ammonium lyase (PAL) pathway seems to potentiate plant cell death. Also involved in phylloquinone (vitamin K1) synthesis. Has no isochorismate pyruvate lyase (IPL) activity.	Cytosolic
WP_069480562.1 MULTISPECIES: BhlA/UviB family holin-like peptide [Lysinibacillus]	+	-	Unknown	Unknown
WP_080695199.1 MULTISPECIES: alpha-E domain-containing protein [Lysinibacillus]	+	-	Integrin alpha-E/beta-7 is a receptor for E-cadherin. It mediates adhesion of intra-epithelial T-lymphocytes to epithelial cell monolayers.	Membrane
WP_080695243.1 MULTISPECIES: DUF3889 domain-containing protein [Lysinibacillus]	+	-	Unknown	Unknown
WP_082340366.1 MULTISPECIES: amidase family protein [Lysinibacillus]	+	-	catalyses the hydrolysis of the C-terminal amide bond of peptides	Cytosolic
WP_085961712.1 MULTISPECIES: IS3 family transposase [Lysinibacillus]	+	-	identify the inverse terminal repeat sequences within the DNA	Cytosolic
WP_089984933.1 MULTISPECIES: Mur ligase family protein [Lysinibacillus]	+	-	successive additions of L-alanine, D-glutamate, meso-diaminopimelate or L-lysine, and D-alanyl-D-alanine to UDP-N	Cytosolic
WP_089986041.1 MULTISPECIES: uracil-DNA glycosylase [Lysinibacillus]	+	-	protects genomic information integrity by catalyzing the excision from DNA of uracil nucleobases resulting from misincorporation or spontaneous cytosine deamination	Cytosolic
WP_089986115.1 MULTISPECIES: tyrosine--tRNA ligase [Lysinibacillus]	+	-	regulatory	Cytosolic
WP_090002593.1 MULTISPECIES: precorrin-4 C(11)-methyltransferase [Lysinibacillus]	+	-	Catalyzes the methylation of C-11 in cobalt-precorrin-4 to form cobalt-precorrin-5A.	Cytosolic
WP_099805038.1 MULTISPECIES: YggS family pyridoxal phosphate-dependent enzyme [Lysinibacillus]	+	-	pyridoxal phosphate binding	Cytosolic
WP_107921778.1 MULTISPECIES: riboflavin synthase [Lysinibacillus]	+	-	Catalyzes the dismutation of two molecules of 6,7-dimethyl-8-ribityllumazine, resulting in the formation of riboflavin and 5-amino-6-(D-ribitylamino)uracil	Cytosolic
WP_107922665.1 MULTISPECIES: phBC6A51 family helix-turn-helix protein [Lysinibacillus]	+	-	Reguatory	Cytosolic
WP_112117412.1 MULTISPECIES: oligoendopeptidase F [Lysinibacillus]	+	-	Hydrolyzes peptides containing between 7 and 17 amino acids with a rather wide specificity.	Cytosolic
WP_115674134.1 MULTISPECIES: alanine--tRNA ligase [Lysinibacillus]	+	-	Catalytic activity	Cytosolic
WP_126657341.1 MULTISPECIES: DRTGG domain-containing protein [Lysinibacillus]	+	-	describes the position of regions of compositional bias within the protein	Cytosolic
WP_126659412.1 MULTISPECIES: riboflavin synthase [Lysinibacillus]	+	-	Catalyzes the dismutation of two molecules of 6,7-dimethyl-8-ribityllumazine, resulting in the formation of riboflavin and 5-amino-6-(D-ribitylamino)uracil	Cytosolic
WP_131521218.1 MULTISPECIES: LysR family transcriptional regulator [Lysinibacillus]	+	-	Reguatory	Cytosolic
WP_139015328.1 MULTISPECIES: transposase [Lysinibacillus]	+	-	identify the inverse terminal repeat sequences within the DNA	Cytosolic
WP_150908020.1 MULTISPECIES: riboflavin biosynthesis protein RibF [Lysinibacillus]	+	-	binding site that allows ATP molecule to interact. This binding sites is a micro-environment where ATP is captured and hydrolyzed to ADP, releasing energy which is utilized by the protein	Cytosolic
WP_158511880.1 MULTISPECIES: topoisomerase C-terminal repeat-containing protein [Lysinibacillus]	+	-	Catalytic activity	Cytosolic
WP_171821124.1 MULTISPECIES: DNA polymerase III subunit alpha [Lysinibacillus]	+	-	Catalytic activity	Cytosolic
WP_197150523.1 MULTISPECIES: penicillin-binding protein 1A [Lysinibacillus]	+	-	bind to penicillin and other antibiotics of the β-lactam class. Penicillin-binding proteins are generally enzymes involved in peptidoglycan biosynthesis	Membrane
WP_202341242.1 MULTISPECIES: Nif3-like dinuclear metal center hexameric protein [Lysinibacillus]	+	-	Unknown	Cytosolic
WP_206700857.1 MULTISPECIES: phosphoribosylformylglycinamidine cyclo-ligase [Lysinibacillus]	+	-	Catalytic activity	Cytosolic
WP_206700873.1 MULTISPECIES: hypothetical protein [Lysinibacillus]	+	-	Unknown	Unknown
WP_206700893.1 MULTISPECIES: UDP-N-acetylglucosamine 1-carboxyvinyltransferase [Lysinibacillus]	+	-	Cell wall formation
WP_206700916.1 MULTISPECIES: ribosome biogenesis GTPase YlqF [Lysinibacillus]	+	-	50S ribosomal subunit assembly	Cytosolic
WP_206700942.1 MULTISPECIES: septum site-determining protein MinD [Lysinibacillus]	+	-	site-determining factor through the activation and regulation of MinC	Cytosolic
WP_206700954.1 MULTISPECIES: 50S ribosomal protein L11 methyltransferase [Lysinibacillus]	+	-	metal ion binding	Membrane
WP_206701011.1 MULTISPECIES: LytTR family transcriptional regulator [Lysinibacillus]	+	-	Regulatory	Cytosolic
WP_206701022.1 MULTISPECIES: sodium:proton antiporter [Lysinibacillus]	+	-	transport sodium (or several other monovalent cations) in exchange for H(+) across lipid bilayers in all kingdoms of life	Membrane
WP_206701050.1 MULTISPECIES: 1-acyl-sn-glycerol-3-phosphate acyltransferase [Lysinibacillus]	+	-	Converts 1-acyl-sn-glycerol-3-phosphate (lysophosphatidic acid or LPA) into 1,2-diacyl-sn-glycerol-3-phosphate (phosphatidic acid or PA) by incorporating an acyl moiety at the sn-2 position of the glycerol backbone	Cytosolic
WP_206701073.1 LytTR family DNA-binding domain-containing protein [Lysinibacillus fusiformis]	+	-	DNA-binding transcription factor activity	Cytosolic
WP_208704486.1 MULTISPECIES: CocE/NonD family hydrolase [Lysinibacillus]	+	-	dipeptidyl-peptidase activity	Cytosolic
WP_217580422.1 MULTISPECIES: phage head closure protein [Lysinibacillus]	+	-	bacteriophage stopper protein is to keep DNA in the head before the tail attaches	Membrane
WP_217581165.1 MULTISPECIES: GrpB family protein [Lysinibacillus]	+	-	Unknown	Unknown
WP_217581670.1 MULTISPECIES: PucR family transcriptional regulator ligand-binding domain-containing protein [Lysinibacillus]	+	-	Regulatory	Cytosolic
WP_225341041.1 MULTISPECIES: formate dehydrogenase accessory sulfurtransferase FdhD [Lysinibacillus]	+	-	Required for formate dehydrogenase (FDH) activity. Acts as a sulfur carrier protein that transfers sulfur from IscS to the molybdenum cofactor prior to its insertion into FDH.	Cytosolic
WP_227256819.1 MULTISPECIES: N-acetylglucosamine-6-phosphate deacetylase [Lysinibacillus]	+	-	biosynthesis of amino-sugar-nucleotides	Cytosolic
WP_227256876.1 MULTISPECIES: KR domain-containing protein [Lysinibacillus]	+	-	catalyses the first step in the reductive modification of the beta-carbonyl centres in the growing polyketide chain	Cytosolic
WP_227256903.1 MULTISPECIES: YhcN/YlaJ family sporulation lipoprotein [Lysinibacillus]	+	-	sporulation resulting in formation of a cellular spore	Cytosolic
WP_227256914.1 MULTISPECIES: acyltransferase family protein [Lysinibacillus]	+	-	1-acylglycerol-3-phosphate O-acyltransferase activity	Cytosolic
WP_227256919.1 MULTISPECIES: alpha-amylase family glycosyl hydrolase [Lysinibacillus]	+	-	act on the α(1→4) glycosidic linkages in glycogen, starch, and related α-glucans	Membrane
WP_227256924.1 MULTISPECIES: ribonuclease HII [Lysinibacillus]	+	-	Regulatory	Cytosolic
WP_227256943.1 MULTISPECIES: recombinase family protein [Lysinibacillus]	+	-	DNA binding & DNA strand exchange activity	Cytosolic
WP_227665385.1 MULTISPECIES: HAMP domain-containing histidine kinase [Lysinibacillus]	+	-	signal transduction	Membrane
WP_231785613.1 MULTISPECIES: heme ABC transporter substrate-binding protein IsdE [Lysinibacillus]	+	-	Transportation	Membrane
WP_233433797.1 MULTISPECIES: class A beta-lactamase-related serine hydrolase [Lysinibacillus]	+	-	hydrolase activity	Cytosolic
WP_241744838.1 MULTISPECIES: phage tail tape measure protein [Lysinibacillus]	+	-	dictates the tail length and facilitates DNA transit to the cell cytoplasm during infection	Membrane
WP_241744839.1 MULTISPECIES: hypothetical protein [Lysinibacillus]	+	-	Unknown	Unknown
WP_004225827.1 MULTISPECIES: tRNA (adenosine(37)-N6)-dimethylallyltransferase MiaA [Lysinibacillus]	-	+	Catalyzes the transfer of a dimethylallyl group onto the adenine at position 37 in tRNAs that read codons beginning with uridine, leading to the formation of N6-(dimethylallyl)adenosine (i6A).	Cytosolic
WP_008178382.1 MULTISPECIES: diguanylate cyclase [Lysinibacillus]	-	+	formation of the ubiquitous second messenger, cyclic-di-GMP, involved in bacterial biofilm formation and persistence	Cytosolic
WP_008180273.1 MULTISPECIES: RNA-binding S4 domain-containing protein [Lysinibacillus]	-	+	DNA binding	Cytosolic
WP_008180473.1 MULTISPECIES: large conductance mechanosensitive channel protein MscL [Lysinibacillus]	-	+	identical protein binding	Cytosolic
WP_008180649.1 MULTISPECIES: ATP-dependent protease ATP-binding subunit ClpX [Lysinibacillus]	-	+	Uses cycles of ATP binding and hydrolysis to unfold proteins and translocate them to the ClpP protease	Cytosolic
WP_008180720.1 MULTISPECIES: FliA/WhiG family RNA polymerase sigma factor [Lysinibacillus]	-	+	DNA binding	Cytosolic
WP_008180761.1 MULTISPECIES: flagellar basal body-associated protein FliL [Lysinibacillus]	-	+	bacterial-type flagellum-dependent swarming motility	Membrane
WP_008181126.1 MULTISPECIES: Rrf2 family transcriptional regulator [Lysinibacillus]	-	+	Reguatory	Cytosolic
WP_008181678.1 MULTISPECIES: acyl carrier protein [Lysinibacillus]	-	+	fatty acid biosynthesis cycle	Cytosolic
WP_008181708.1 MULTISPECIES: 50S ribosomal protein L15 [Lysinibacillus]	-	+	late stages of subunit assembly, and is essential for 5S rRNA assembly onto the ribosome.	Cytosolic
WP_008181717.1 MULTISPECIES: 30S ribosomal protein S8 [Lysinibacillus]	-	+	One of the primary rRNA binding proteins, it binds directly to 16S rRNA central domain where it helps coordinate assembly of the platform of the 30S subunit.	Cytosolic
WP_008181911.1 MULTISPECIES: 30S ribosomal protein S19 [Lysinibacillus]	-	+	One of the primary rRNA binding proteins, it binds directly to 16S rRNA central domain where it helps coordinate assembly of the platform of the 30S subunit.	Cytosolic
WP_009371656.1 MULTISPECIES: serine--tRNA ligase [Lysinibacillus]	-	+	Catalyzes the attachment of serine to tRNA(Ser)	Cytosolic
WP_010857065.1 MULTISPECIES: twin-arginine translocase TatA/TatE family subunit [Lysinibacillus]	-	+	protein transport by the Tat complex	Membrane
WP_010858115.1 MULTISPECIES: NAD kinase [Lysinibacillus]	-	+	Catalytic activity	Cytosolic
WP_010858200.1 MULTISPECIES: aspartyl-phosphate phosphatase Spo0E family protein [Lysinibacillus]	-	+	hydrolase activity	Cytosolic
WP_010858682.1 MULTISPECIES: ferredoxin family protein [Lysinibacillus]	-	+	cellular electron transfer protein involved in the in vivo assembly of the Fe-S clusters in a wide variety of iron-sulfur proteins.	Membrane
WP_010859201.1 MULTISPECIES: cold-shock protein [Lysinibacillus]	-	+	counteract some harmful effects of temperature downshift and thus help the cells to adapt	Cytosolic
WP_010860592.1 MULTISPECIES: 50S ribosomal protein L15 [Lysinibacillus]	-	+	late stages of subunit assembly, and is essential for 5S rRNA assembly onto the ribosome.	Cytosolic
WP_010860598.1 MULTISPECIES: 50S ribosomal protein L29 [Lysinibacillus]	-	+	late stages of subunit assembly, and is essential for 5S rRNA assembly onto the ribosome.	Cytosolic
WP_010860599.1 MULTISPECIES: 50S ribosomal protein L16 [Lysinibacillus]	-	+	late stages of subunit assembly, and is essential for 5S rRNA assembly onto the ribosome.	Cytosolic
WP_012291646.1 MULTISPECIES: NYN domain-containing protein [Lysinibacillus]	-	+	regulation of gene expression	Cytosolic
WP_012291661.1 MULTISPECIES: S-4TM family putative pore-forming effector [Lysinibacillus]	-	+	ation-selective pore-forming toxin	Membrane
WP_012291792.1 MULTISPECIES: Larvicidal toxin protein [Lysinibacillus]	-	+	toxin activity	Membrane
WP_012291802.1 MULTISPECIES: YolD-like family protein [Lysinibacillus]	-	+	Unknown	Unknown
WP_012291832.1 MULTISPECIES: DNA topoisomerase (ATP-hydrolyzing) subunit B [Lysinibacillus]	-	+	cleave one DNA strand and pass either one or two DNA strands through the break before resealing it	Cytosolic
WP_012291834.1 MULTISPECIES: HD-GYP domain-containing protein [Lysinibacillus]	-	+	hydrolysis	Cytosolic
WP_012291836.1 MULTISPECIES: patatin-like phospholipase family protein [Lysinibacillus]	-	+	catalysing the cleavage of fatty acids from membrane lipids	Cytosolic
WP_012291841.1 MULTISPECIES: pyridoxal 5'-phosphate synthase lyase subunit PdxS [Lysinibacillus]	-	+	Catalyzes the formation of pyridoxal 5'-phosphate from ribose 5-phosphate (RBP), glyceraldehyde 3-phosphate (G3P) and ammonia.	Cytosolic
WP_012291849.1 MULTISPECIES: deoxynucleoside kinase [Lysinibacillus]	-	+	Deoxyribonucleoside kinase that has a broad specificity phosphorylating thymidine, 2'-deoxyriboadenosine, 2'-deoxyribocytidine and 2'-deoxyriboguanosine	Cytosolic
WP_012291852.1 MULTISPECIES: methyl-accepting chemotaxis protein [Lysinibacillus]	-	+	reversible methylation during adaptation of bacterial cells to environmental attractants and repellents	Cytosolic
WP_012291866.1 MULTISPECIES: tRNA1(Val) (adenine(37)-N6)-methyltransferase [Lysinibacillus]	-	+	Specifically methylates the adenine in position 37 of tRNA1(Val) (anticodon cmo5UAC).	Cytosolic
WP_012291873.1 MULTISPECIES: ribonuclease M5 [Lysinibacillus]	-	+	Endonucleolytic cleavage of RNA	Cytosolic
WP_012291886.1 MULTISPECIES: stage V sporulation protein T [Lysinibacillus]	-	+	DNA binding	Cytosolic
WP_012291890.1 MULTISPECIES: septum formation initiator family protein [Lysinibacillus]	-	+	Unknown	Unknown
WP_012291911.1 MULTISPECIES: alanine:cation symporter family protein [Lysinibacillus]	-	+	alanine:sodium symporter activity	Membrane
WP_012291914.1 MULTISPECIES: (2Fe-2S)-binding protein [Lysinibacillus]	-	+	2 iron, 2 sulfur cluster binding	Membrane
WP_012291944.1 MULTISPECIES: non-ribosomal peptide synthetase [Lysinibacillus]	-	+	catalyze the synthesis of highly diverse natural products of bacterial or fungal origin	Cytosolic
WP_012291945.1 MULTISPECIES: methyl-accepting chemotaxis protein [Lysinibacillus]	-	+	reversible methylation during adaptation of bacterial cells to environmental attractants and repellents	Cytosolic
WP_012291947.1 MULTISPECIES: AAA family ATPase [Lysinibacillus]	-	+	nucleophilic attack on the ATP gamma-phosphate by an activated water molecule, leading to movement of the N-terminal and C-terminal AAA subdomains relative to each other.	Cytosolic
WP_012291955.1 MULTISPECIES: catalase [Lysinibacillus]	-	+	neutralization through decomposition of hydrogen peroxide, thereby maintaining an optimum level of the molecule in the cell which is also essential for cellular signaling processes.	Cytosolic
WP_012291957.1 MULTISPECIES: ring-cleaving dioxygenase [Lysinibacillus]	-	+	catalyze the oxygenolytic fission of catecholic compounds	Cytosolic
WP_012291964.1 MULTISPECIES: ABC transporter ATP-binding protein [Lysinibacillus]	-	+	Responsible for energy coupling to the transport system (By similarity).	Membrane
WP_012291969.1 MULTISPECIES: endonuclease Q family protein [Lysinibacillus]	-	+	DNA Repair	Cytosolic
WP_012291989.1 MULTISPECIES: P-II family nitrogen regulator [Lysinibacillus]	-	+	ATP binding	Cytosolic
WP_012291991.1 MULTISPECIES: ammonia-dependent NAD(+) synthetase [Lysinibacillus]	-	+	converts nicotinic acid adenine dinucleotide to NAD+ via an adenylylated intermediate	Cytosolic
WP_012292001.1 MULTISPECIES: glutamine-hydrolyzing GMP synthase [Lysinibacillus]	-	+	catalyzes the amination of xanthosine 5'-monophosphate to form GMP in the presence of glutamine and ATP	Cytosolic
WP_012292012.1 MULTISPECIES: phosphoribosylformylglycinamidine synthase subunit PurS [Lysinibacillus]	-	+	converting glutamine to glutamate	Cytosolic
WP_012292021.1 MULTISPECIES: amidohydrolase family protein [Lysinibacillus]	-	+	hydrolase activity	Cytosolic
WP_012292025.1 MULTISPECIES: NAD-dependent DNA ligase LigA [Lysinibacillus]	-	+	join the ends of DNA molecules during replication, repair and recombination	Cytosolic
WP_012292036.1 MULTISPECIES: glycerol-3-phosphate dehydrogenase/oxidase [Lysinibacillus]	-	+	Metabolism	Cytosolic
WP_012292039.1 MULTISPECIES: glycerol kinase GlpK [Lysinibacillus]	-	+	Key enzyme in the regulation of glycerol uptake and metabolism	Cytosolic
WP_012292041.1 MULTISPECIES: serine protease [Lysinibacillus]	-	+	cleave peptide bonds in proteins.	Cytosolic
WP_012292052.1 MULTISPECIES: sporulation protein YhbH [Lysinibacillus]	-	+	Unknown	Unknown
WP_012292071.1 MULTISPECIES: amino acid racemase [Lysinibacillus]	-	+	Metabolism	Cytosolic
WP_012292114.1 MULTISPECIES: TerD family protein [Lysinibacillus]	-	+	response to tellurium ion	Membrane
WP_012292123.1 MULTISPECIES: thioredoxin-dependent thiol peroxidase [Lysinibacillus]	-	+	reduce peroxides as part of antioxidant defenses and redox signaling	Cytosolic
WP_012292133.1 MULTISPECIES: GDSL-type esterase/lipase family protein [Lysinibacillus]	-	+	hydrolyze many kinds of substrates such as thioesters, aryl esters, phospholipids and amino acids	Cytosolic
WP_012292141.1 MULTISPECIES: catalase [Lysinibacillus]	-	+	neutralization through decomposition of hydrogen peroxide, thereby maintaining an optimum level of the molecule in the cell which is also essential for cellular signaling processes.	Cytosolic
WP_012292153.1 MULTISPECIES: YafY family transcriptional regulator [Lysinibacillus]	-	+	DNA-binding transcription factor activity	Cytosolic
WP_012292160.1 MULTISPECIES: DUF445 family protein [Lysinibacillus]	-	+	unknown	Cytosolic
WP_012292162.1 MULTISPECIES: ribonuclease H family protein [Lysinibacillus]	-	+	cleave the RNA of RNA/DNA hybrids that form during replication and repair	Cytosolic
WP_012292167.1 MULTISPECIES: glycerate kinase [Lysinibacillus]	-	+	Catalyzes one of the two ATP producing reactions in the glycolytic pathway via the reversible conversion of 1,3-diphosphoglycerate to 3-phosphoglycerate	Cytosolic
WP_012292171.1 MULTISPECIES: HAD family hydrolase [Lysinibacillus]	-	+	phosphatase activity	Cytosolic
WP_012292203.1 MULTISPECIES: YhgE/Pip domain-containing protein [Lysinibacillus]	-	+	Unknown	Membrane
WP_012292212.1 MULTISPECIES: fatty acid--CoA ligase family protein [Lysinibacillus]	-	+	Catalyzes the conversion of long-chain fatty acids to their active form acyl-CoAs for both synthesis of cellular lipids	Cytosolic
WP_012292213.1 MULTISPECIES: VTT domain-containing protein [Lysinibacillus]	-	+	Unknown	Membrane
WP_012292224.1 MULTISPECIES: histidinol dehydrogenase [Lysinibacillus]	-	+	Catalyzes the sequential NAD-dependent oxidations of L-histidinol to L-histidinaldehyde and then to L-histidine.	Cytosolic
WP_012292227.1 MULTISPECIES: imidazole glycerol phosphate synthase subunit HisF [Lysinibacillus]	-	+	IGPS catalyzes the conversion of PRFAR and glutamine to IGP, AICAR and glutamate. The HisF subunit catalyzes the cyclization activity that produces IGP and AICAR from PRFAR using the ammonia provided by the HisH subunit.	Cytosolic
WP_012292228.1 MULTISPECIES: bifunctional phosphoribosyl-AMP cyclohydrolase/phosphoribosyl-ATP diphosphatase HisIE [Lysinibacillus]	-	+	Catalytic activity	Cytosolic
WP_012292231.1 MULTISPECIES: 8-oxo-dGTP diphosphatase [Lysinibacillus]	-	+	Catalytic activity	Cytosolic
WP_012292232.1 MULTISPECIES: RNase adapter RapZ [Lysinibacillus]	-	+	Modulates the synthesis of GlmS	Cytosolic
WP_012292233.1 MULTISPECIES: YvcK family protein [Lysinibacillus]	-	+	Required for morphogenesis under gluconeogenic growth conditions.	Cytosolic
WP_012292240.1 MULTISPECIES: S9 family peptidase [Lysinibacillus]	-	+	serine-type peptidase activity	Cytosolic
WP_012292248.1 MULTISPECIES: phosphopyruvate hydratase [Lysinibacillus]	-	+	Catalytic activity	Cytosolic
WP_012292250.1 MULTISPECIES: GNAT family N-acetyltransferase [Lysinibacillus]	-	+	aminoglycoside antibiotic resistance, transcription regulation, protein acetylation and stress reaction	Cytosolic
WP_012292261.1 MULTISPECIES: site-specific integrase [Lysinibacillus]	+	+	DNA molecules are rearranged by breaking and rejoining the strands at specific points	Cytosolic
WP_012292289.1 MULTISPECIES: GNAT family N-acetyltransferase [Lysinibacillus]	-	+	aminoglycoside antibiotic resistance, transcription regulation, protein acetylation and stress reaction	Cytosolic
WP_012292296.1 MULTISPECIES: S-layer homology domain-containing protein [Lysinibacillus]	-	+	maintenance of cell integrity, enzyme display and, in pathogens and commensals, interaction with the host and its immune system	Membrane
WP_012292298.1 MULTISPECIES: FAD-dependent oxidoreductase [Lysinibacillus]	-	+	Metabolism	Cytosolic
WP_012292327.1 MULTISPECIES: glycosyl hydrolase family 18 protein [Lysinibacillus]	-	+	Hydrolysis	Cytosolic
WP_012292332.1 MULTISPECIES: SUF system NifU family Fe-S cluster assembly protein [Lysinibacillus]	-	+	assembly protein	Membrane
WP_012292395.1 MULTISPECIES: sigma-54-dependent Fis family transcriptional regulator [Lysinibacillus]	-	+	ATP binding	Cytosolic
WP_012292398.1 MULTISPECIES: Glu/Leu/Phe/Val dehydrogenase [Lysinibacillus]	-	+	nucleotide binding	Cytosolic
WP_012292402.1 MULTISPECIES: MgtC/SapB family protein [Lysinibacillus]	-	+	Unknown	Membrane
WP_012292413.1 MULTISPECIES: sel1 repeat family protein [Lysinibacillus]	-	+	beta-lactamase activity	Cytosolic
WP_012292449.1 MULTISPECIES: gluconate 2-dehydrogenase subunit 3 family protein [Lysinibacillus]	-	+	catalyzes the conversion of D-gluconate to 2-dehydro-D-gluconate. The role of this subunit in the heterotrimer is not known.	Cytosolic
WP_012292462.1 MULTISPECIES: acetamidase/formamidase family protein [Lysinibacillus]	-	+
WP_012292466.1 MULTISPECIES: sensor domain-containing diguanylate cyclase [Lysinibacillus]	-	+	formation of the ubiquitous second messenger, cyclic-di-GMP, involved in bacterial biofilm formation and persistence	Cytosolic
WP_012292468.1 MULTISPECIES: S-layer homology domain-containing protein [Lysinibacillus]	-	+	maintenance of cell integrity, enzyme display and, in pathogens and commensals, interaction with the host and its immune system	Membrane
WP_012292478.1 MULTISPECIES: ABC transporter substrate-binding protein [Lysinibacillus]	-	+	amino acid transport	Membrane
WP_012292486.1 MULTISPECIES: catalase [Lysinibacillus]	-	+	neutralization through decomposition of hydrogen peroxide, thereby maintaining an optimum level of the molecule in the cell which is also essential for cellular signaling processes.	Cytosolic
WP_012292489.1 MULTISPECIES: urocanate hydratase [Lysinibacillus]	-	+	degradation of histidine	Cytosolic
WP_012292505.1 MULTISPECIES: Nramp family divalent metal transporter [Lysinibacillus]	-	+	iron uptake	Membrane
WP_012292539.1 MULTISPECIES: NAD(P)/FAD-dependent oxidoreductase [Lysinibacillus]	-	+	Metabolism	Cytosolic
WP_012292541.1 MULTISPECIES: M20/M25/M40 family metallo-hydrolase [Lysinibacillus]	-	+	metal binding	Cytosolic
WP_012292578.1 MULTISPECIES: HAMP domain-containing histidine kinase [Lysinibacillus]	-	+	signal transduction	Membrane
WP_012292590.1 MULTISPECIES: amidohydrolase [Lysinibacillus]	+	+	cytosine degradation, atrazine degradation	Cytosolic
WP_012292591.1 MULTISPECIES: Na+/H+ antiporter NhaC [Lysinibacillus]	-	+	Transport	Membrane
WP_012292612.1 MULTISPECIES: response regulator transcription factor [Lysinibacillus]	-	+	Reguatory	Cytosolic
WP_012292636.1 MULTISPECIES: glycerophosphodiester phosphodiesterase [Lysinibacillus]	+	+	Hydrolyzes glycerolphosphoglycerol, glycerophosphocholine and glycerophosphoethanolamine in vitro.	Membrane (Plasma)
WP_012292663.1 MULTISPECIES: enoyl-CoA hydratase [Lysinibacillus]	-	+	catalyzes the second step in the physiologically important beta-oxidation pathway of fatty acid metabolism	Cytosolic (mitochondria)
WP_012292664.1 MULTISPECIES: acyl-CoA carboxylase subunit beta [Lysinibacillus]	-	+	catalyzes the carboxylation of acetyl-CoA to form malonyl-CoA	Cytosolic
WP_012292678.1 MULTISPECIES: pyridoxal phosphate-dependent aminotransferase [Lysinibacillus]	-	+	Metabolism	Cytosolic
WP_012292680.1 MULTISPECIES: PucR family transcriptional regulator [Lysinibacillus]	-	+	Regulatory	Cytosolic
WP_012292694.1 MULTISPECIES: bifunctional hydroxymethylpyrimidine kinase/phosphomethylpyrimidine kinase [Lysinibacillus]	-	+	involved in the biosynthesis of the essential cofactor thiamine pyrophosphate	Cytosolic
WP_012292706.1 MULTISPECIES: HD domain-containing protein [Lysinibacillus]	-	+	phosphohydrolase activity	Cytosolic
WP_012292707.1 MULTISPECIES: LPXTG cell wall anchor domain-containing protein [Lysinibacillus]	-	+	cleaves proteins between the threonine and the glycine	Membrane
WP_012292728.1 MULTISPECIES: acyl-CoA dehydrogenase [Lysinibacillus]	+	+	Metabolism	Cytosolic
WP_012292761.1 MULTISPECIES: EAL domain-containing protein [Lysinibacillus]	-	+	Unknown	Cytosolic
WP_012292841.1 MULTISPECIES: tyrosine-type recombinase/integrase [Lysinibacillus]	-	+	rearrange DNA duplexes by means of conservative site-specific recombination reactions	Cytosolic
WP_012292871.1 MULTISPECIES: NlpC/P60 family protein [Lysinibacillus]	-	+	cleave noncanonical peptide linkages and contribute to cell wall remodeling as well as cell separation during late stages of division	Cytosolic
WP_012292873.1 MULTISPECIES: S-layer homology domain-containing protein [Lysinibacillus]	-	+	maintenance of cell integrity, enzyme display and, in pathogens and commensals, interaction with the host and its immune system	Membrane
WP_012292877.1 MULTISPECIES: sigma 54-interacting transcriptional regulator [Lysinibacillus]	-	+	Regulatory	Cytosolic
WP_012292891.1 MULTISPECIES: DUF3225 domain-containing protein [Lysinibacillus]	-	+	unknown	Cytosolic
WP_012292899.1 MULTISPECIES: flagellar hook-associated protein FlgL [Lysinibacillus]	-	+	mobility	Membrane
WP_012292910.1 MULTISPECIES: sulfatase-like hydrolase/transferase [Lysinibacillus]	-	+	transferase activity, transferring phosphorus-containing groups, Ester Transferase activity	Cytosolic
WP_012292915.1 MULTISPECIES: ribosome-associated translation inhibitor RaiA [Lysinibacillus]	-	+	Regulatory	Cytosolic
WP_012292929.1 MULTISPECIES: S41 family peptidase [Lysinibacillus]	-	+	biosynthesis of the secondary metabolite ustiloxin B, an antimitotic tetrapeptide	Cytosolic
WP_012292935.1 MULTISPECIES: XRE family transcriptional regulator [Lysinibacillus]	-	+	Regulatory	Cytosolic
WP_012292960.1 MULTISPECIES: lytic transglycosylase domain-containing protein [Lysinibacillus]	-	+	role for the active-site glutamic acid in proton transfe	Cytosolic
WP_012292963.1 MULTISPECIES: GTP pyrophosphokinase family protein [Lysinibacillus]	-	+	ppGpp biosynthesis	Cytosolic
WP_012293036.1 MULTISPECIES: RNA degradosome polyphosphate kinase [Lysinibacillus]	-	+	catalyses the reversible polymerization of the gamma-phosphate of ATP into polyphosphate	Cytosolic
WP_012293037.1 MULTISPECIES: bifunctional diguanylate cyclase/phosphodiesterase [Lysinibacillus]	-	+	formation of the ubiquitous second messenger, cyclic-di-GMP, involved in bacterial biofilm formation and persistence	Cytosolic
WP_012293042.1 MULTISPECIES: 3-hydroxybutyrate dehydrogenase [Lysinibacillus]	-	+	Metabolism	Cytosolic
WP_012293044.1 MULTISPECIES: 2,4-dienoyl-CoA reductase [Lysinibacillus]	-	+	fatty acid oxidation	Cytosolic
WP_012293045.1 MULTISPECIES: CBS domain-containing protein [Lysinibacillus]	-	+	ion channels and transporters	Membrane
WP_012293124.1 MULTISPECIES: heme o synthase [Lysinibacillus]	-	+	heme synthesis	Cytosolic
WP_012293131.1 MULTISPECIES: YugN family protein [Lysinibacillus]	-	+	Unknown	Cytosolic
WP_012293134.1 MULTISPECIES: PaaI family thioesterase [Lysinibacillus]	-	+	catalyze the hydrolysis of thioester bonds between coenzyme A and phenylacetyl-CoA	Cytosolic
WP_012293168.1 MULTISPECIES: RNA polymerase sporulation sigma factor SigG [Lysinibacillus]	-	+	Regulatory	Cytosolic
WP_012293206.1 MULTISPECIES: primosomal protein N' [Lysinibacillus]	-	+	involved in replication, repair, and recombination	Cytosolic
WP_012293212.1 MULTISPECIES: Stk1 family PASTA domain-containing Ser/Thr kinase [Lysinibacillus]	-	+	controlling peptidoglycan synthesis	Membrane
WP_012293220.1 MULTISPECIES: M20/M25/M40 family metallo-hydrolase [Lysinibacillus]	-	+	metal binding	Cytosolic
WP_012293236.1 MULTISPECIES: 3-oxoacyl-[acyl-carrier-protein] reductase [Lysinibacillus]	-	+	NADPH-dependent reduction of beta-ketoacyl-ACP substrates to beta-hydroxyacyl-ACP products	Cytosolic
WP_012293240.1 MULTISPECIES: chromosome segregation protein SMC [Lysinibacillus]	-	+	Regulatory	Cytosolic
WP_012293269.1 MULTISPECIES: flagellar FlbD family protein [Lysinibacillus]	-	+	mobility	Membrane
WP_012293272.1 MULTISPECIES: flagellar motor switch phosphatase FliY [Lysinibacillus]	-	+	mobility	Membrane
WP_012293278.1 MULTISPECIES: flagellar biosynthesis protein FlhB [Lysinibacillus]	-	+	Flagella Biosynthesis	Membrane
WP_012293280.1 MULTISPECIES: flagellar biosynthesis protein FlhF [Lysinibacillus]	-	+	Flagella Biosynthesis	Membrane
WP_012293281.1 MULTISPECIES: MinD/ParA family protein [Lysinibacillus]	-	+	ATPase activity	Membrane
WP_012293303.1 MULTISPECIES: YlxR family protein [Lysinibacillus]	-	+	Glucose-Responsive Metabolic Changes, Regulates Expression of tsaD for Protein Quality Control of Pyruvate Dehydrogenase	Cytosolic
WP_012293305.1 MULTISPECIES: 30S ribosome-binding factor RbfA [Lysinibacillus]	-	+	Regulatory	Cytosolic
WP_012293318.1 MULTISPECIES: ribonuclease J [Lysinibacillus]	-	+	Regulatory	Cytosolic
WP_012293336.1 MULTISPECIES: CpsD/CapB family tyrosine-protein kinase [Lysinibacillus]	-	+	regulation of capsular polysaccharide biosynthesis	Cytosolic
WP_012293355.1 MULTISPECIES: outer spore coat protein CotE [Lysinibacillus]	-	+	protects a dormant spore from enzymes, such as lysozyme (11), and from mechanical disruption	Cytosolic
WP_012293357.1 MULTISPECIES: DNA mismatch repair endonuclease MutL [Lysinibacillus]	-	+	Regulatory	Cytosolic
WP_012293379.1 MULTISPECIES: phage holin [Lysinibacillus]	-	+	trigger and control the degradation of the host's cell wall at the end of the lytic cycle	Cytosolic
WP_012293380.1 MULTISPECIES: DUF2339 domain-containing protein [Lysinibacillus]	-	+	unknown	Cytosolic
WP_012293388.1 MULTISPECIES: DUF896 domain-containing protein [Lysinibacillus]	-	+	unknown	Cytosolic
WP_012293408.1 MULTISPECIES: thymidine phosphorylase [Lysinibacillus]	-	+	onversion of thymidine to thymine and 2-deoxy-α-D-ribose-1-phosphate	Cytosolic
WP_012293418.1 MULTISPECIES: rRNA pseudouridine synthase [Lysinibacillus]	-	+	Regulatory	Cytosolic
WP_012293444.1 MULTISPECIES: GTP cyclohydrolase II [Lysinibacillus]	-	+	conversion of GTP to 2,5-diamino-6-ribosylamino-4(3H)-pyrimidinone 5'-phosphate (DARP), formate and pyrophosphate	Cytosolic
WP_012293446.1 MULTISPECIES: FAD-dependent monooxygenase [Lysinibacillus]	-	+	catalyze hydroxylation, epoxidation, and halogenation reactions and are physiologically involved in amino acid metabolism, mineralization of aromatic compounds, and biosynthesis of secondary metabolites	Cytosolic
WP_012293464.1 MULTISPECIES: ImmA/IrrE family metallo-endopeptidase [Lysinibacillus]	-	+	Regulatory	Cytosolic
WP_012293488.1 MULTISPECIES: IS3 family transposase [Lysinibacillus]	-	+	identify the inverse terminal repeat sequences within the DNA	Cytosolic
WP_012293496.1 MULTISPECIES: ABC transporter ATP-binding protein [Lysinibacillus]	-	+	Responsible for energy coupling to the transport system (By similarity).	Membrane
WP_012293510.1 MULTISPECIES: 2,3-butanediol dehydrogenase [Lysinibacillus]	-	+
WP_012293541.1 MULTISPECIES: S-layer homology domain-containing protein [Lysinibacillus]	-	+	maintenance of cell integrity, enzyme display and, in pathogens and commensals, interaction with the host and its immune system	Membrane
WP_012293545.1 MULTISPECIES: arginase [Lysinibacillus]	-	+
WP_012293587.1 MULTISPECIES: GNAT family N-acetyltransferase [Lysinibacillus]	-	+	aminoglycoside antibiotic resistance, transcription regulation, protein acetylation and stress reaction	Cytosolic
WP_012293597.1 MULTISPECIES: YpdA family putative bacillithiol disulfide reductase [Lysinibacillus]	-	+	cellular redox homeostasis	Cytosolic
WP_012293618.1 MULTISPECIES: demethylmenaquinone methyltransferase [Lysinibacillus]	-	+	Essential for Menaquinone Homeostasis in Mycobacterium smegmatis	Cytosolic
WP_012293621.1 MULTISPECIES: site-specific integrase [Lysinibacillus]	+	+	DNA molecules are rearranged by breaking and rejoining the strands at specific points	Cytosolic
WP_012293641.1 MULTISPECIES: long-chain fatty acid--CoA ligase [Lysinibacillus]	-	+	Catalyzes the esterification, concomitant with transport, of exogenous long-chain fatty acids into metabolically active CoA thioesters for subsequent degradation or incorporation into phospholipids	Cytosolic
WP_012293644.1 MULTISPECIES: 3-dehydroquinate synthase [Lysinibacillus]	-	+	production of aromatic amino acids	Cytosolic
WP_012293660.1 MULTISPECIES: N-acetyl-alpha-D-glucosaminyl L-malate synthase BshA [Lysinibacillus]	-	+	bacillithiol (BSH) biosynthesis.	Cytosolic
WP_012293661.1 MULTISPECIES: CCA tRNA nucleotidyltransferase [Lysinibacillus]	-	+	Reguatory	Cytosolic
WP_012293670.1 MULTISPECIES: ATP-dependent DNA helicase DinG [Lysinibacillus]	-	+	Reguatory	Cytosolic
WP_012293714.1 MULTISPECIES: spore germination protein [Lysinibacillus]	+	+	Spore Gemination	Spore
WP_012293736.1 MULTISPECIES: MFS transporter [Lysinibacillus]	+	+	Transporter	Membrane
WP_012293743.1 MULTISPECIES: endonuclease III [Lysinibacillus]	-	+	Reguatory	Cytosolic
WP_012293771.1 MULTISPECIES: phosphate propanoyltransferase [Lysinibacillus]	-	+	involved in the pathway 1,2-propanediol degradation	Cytosolic
WP_012293782.1 MULTISPECIES: IclR family transcriptional regulator [Lysinibacillus]	-	+	Reguatory	Cytosolic
WP_012293788.1 MULTISPECIES: 5-oxoprolinase subunit PxpB [Lysinibacillus]	-	+	Catalyzes the cleavage of 5-oxoproline to form L-glutamate coupled to the hydrolysis of ATP to ADP and inorganic phosphate	Cytosolic
WP_012293789.1 MULTISPECIES: biotin-dependent carboxyltransferase family protein [Lysinibacillus]	-	+	Metabolism	Cytosolic
WP_012293798.1 MULTISPECIES: response regulator transcription factor [Lysinibacillus]	-	+	Reguatory	Cytosolic
WP_012293801.1 MULTISPECIES: EAL domain-containing protein [Lysinibacillus]	-	+	Unknown	Cytosolic
WP_012293806.1 MULTISPECIES: sulfurtransferase [Lysinibacillus]	-	+	Metabolism	Cytosolic
WP_012293811.1 MULTISPECIES: phosphoribosylaminoimidazolesuccinocarboxamide synthase [Lysinibacillus]	-	+	catalyses a step in the purine biosynthesis pathway which aids energy metabolism and DNA synthesis.	Cytosolic
WP_012293845.1 MULTISPECIES: oligoendopeptidase F [Lysinibacillus]	-	+	Hydrolyzes peptides containing between 7 and 17 amino acids with a rather wide specificity.	Cytosolic
WP_012293852.1 MULTISPECIES: heparan-alpha-glucosaminide N-acetyltransferase domain-containing protein [Lysinibacillus]	-	+	acetylates the non-reducing terminal alpha-glucosamine residue of intralysosomal heparin or heparan sulfate, converting it into a substrate for luminal alpha-N-acetyl glucosaminidase	Cytosolic
WP_012293860.1 MULTISPECIES: hydantoinase B/oxoprolinase family protein [Lysinibacillus]	-	+	hydrolase activity	Cytosolic
WP_012293864.1 MULTISPECIES: HD domain-containing protein [Lysinibacillus]	-	+	phosphohydrolase activity	Cytosolic
WP_012293885.1 MULTISPECIES: glutamate 5-kinase [Lysinibacillus]	-	+	biosynthesis of proline from glutamate	Cytosolic
WP_012293892.1 MULTISPECIES: SDR family oxidoreductase [Lysinibacillus]	+	+	oxidoreductase activity	Membrane
WP_012293911.1 MULTISPECIES: LutB/LldF family L-lactate oxidation iron-sulfur protein [Lysinibacillus]	-	+	lactate oxidation	Cytosolic
WP_012293922.1 MULTISPECIES: DUF1572 family protein [Lysinibacillus]	-	+	unknown	Cytosolic
WP_012293926.1 MULTISPECIES: methyl-accepting chemotaxis protein [Lysinibacillus]	-	+	reversible methylation during adaptation of bacterial cells to environmental attractants and repellents	Cytosolic
WP_012293927.1 MULTISPECIES: methyl-accepting chemotaxis protein [Lysinibacillus]	-	+	reversible methylation during adaptation of bacterial cells to environmental attractants and repellents	Cytosolic
WP_012293956.1 MULTISPECIES: Mur ligase family protein [Lysinibacillus]	-	+	successive additions of L-alanine, D-glutamate, meso-diaminopimelate or L-lysine, and D-alanyl-D-alanine to UDP-N	Cytosolic
WP_012293959.1 MULTISPECIES: VOC family protein [Lysinibacillus]	+	+	catalyse reactions with a common mechanistic attribute that is enabled by certain conserved active site residues	Cytosolic
WP_012293963.1 MULTISPECIES: response regulator transcription factor [Lysinibacillus]	-	+	Reguatory	Cytosolic
WP_012293972.1 MULTISPECIES: ABC transporter ATP-binding protein [Lysinibacillus]	-	+	Responsible for energy coupling to the transport system (By similarity).	Membrane
WP_012293980.1 MULTISPECIES: iron uptake transporter deferrochelatase/peroxidase subunit [Lysinibacillus]	-	+	Iron Transportation	Membrane
WP_012293985.1 MULTISPECIES: DUF917 domain-containing protein [Lysinibacillus]	-	+	unknown	Cytosolic
WP_012293986.1 MULTISPECIES: hydantoinase/oxoprolinase family protein [Lysinibacillus]	+	+	hydrolase activity	Cytosolic
WP_012294060.1 MULTISPECIES: Ger(x)C family spore germination protein [Lysinibacillus]	+	+	Spore Gemination	Spore
WP_012294072.1 MULTISPECIES: beta-N-acetylhexosaminidase [Lysinibacillus]	-	+	catalyzes the hydrolysis of terminal, non-reducing β-N-Acetylgalactosamine and glucosamine residues from oligosaccharides	Cytosolic
WP_012294131.1 MULTISPECIES: CueP family metal-binding protein [Lysinibacillus]	-	+	metal Binding	Membrane
WP_012294139.1 MULTISPECIES: hypothetical protein [Lysinibacillus]	-	+	Unknown	Unknown
WP_012294167.1 MULTISPECIES: DinB family protein [Lysinibacillus]	-	+	Metal Binding	Cytosolic
WP_012294169.1 MULTISPECIES: hypothetical protein [Lysinibacillus]	-	+	Unknown	Unknown
WP_012294178.1 MULTISPECIES: Ig-like domain-containing protein [Lysinibacillus]	-	+	Ig-like domain-containing protein	Membrane
WP_012294185.1 MULTISPECIES: DUF6366 family protein [Lysinibacillus]	-	+	unknown	Cytosolic
WP_012294190.1 MULTISPECIES: nucleotidyl transferase AbiEii/AbiGii toxin family protein [Lysinibacillus]	-	+	Transferas activity	Cytosolic
WP_012294202.1 MULTISPECIES: MarR family winged helix-turn-helix transcriptional regulator [Lysinibacillus]	-	+	Reguatory	Cytosolic
WP_012294204.1 MULTISPECIES: MarR family transcriptional regulator [Lysinibacillus]	+	+	Reguatory	Cytosolic
WP_012294232.1 MULTISPECIES: GerAB/ArcD/ProY family transporter [Lysinibacillus]	-	+	Spore Gemination	Cytosolic
WP_012294785.1 MULTISPECIES: VanZ family protein [Lysinibacillus]	+	+	protect bacteria from lipoglycopeptide antibiotics by affecting their binding to the cell surface.	Membrane
WP_012295082.1 MULTISPECIES: site-specific integrase [Lysinibacillus]	+	+	DNA molecules are rearranged by breaking and rejoining the strands at specific points	Cytosolic
WP_012295121.1 MULTISPECIES: C39 family peptidase [Lysinibacillus]	-	+	inhibit the growth of other bacterial species	Cytosolic
WP_012295141.1 MULTISPECIES: molecular chaperone [Lysinibacillus]	-	+	regulatory	Cytosolic
WP_012295145.1 MULTISPECIES: protein phosphatase 2C domain-containing protein [Lysinibacillus]	-	+	catalyzes dephosphorylation and concomitant reactivation of the alpha subunit of the E1 component of the pyruvate dehydrogenase complex	Cytosolic
WP_012295184.1 MULTISPECIES: superoxide dismutase [Lysinibacillus]	-	+	break down potentially harmful oxygen molecules in cells	Cytosolic
WP_012295199.1 MULTISPECIES: O-linked GlcNAc transferase [Lysinibacillus]	-	+	Metabolism	Cytosolic
WP_012295204.1 MULTISPECIES: cellulose biosynthesis cyclic di-GMP-binding regulatory protein BcsB [Lysinibacillus]	-	+	Binds the cellulose synthase activator, bis-(3'-5') cyclic diguanylic acid	Cytosolic
WP_012295215.1 MULTISPECIES: Nif11 family protein [Lysinibacillus]	-	+	Unknown	Cytosolic
WP_012295216.1 MULTISPECIES: deoxyribonuclease IV [Lysinibacillus]	-	+	hydrolytic cleavage of phosphodiester linkages in the DNA backbone, thus degrading DNA	Cytosolic
WP_012295220.1 MULTISPECIES: potassium-transporting ATPase subunit KdpB [Lysinibacillus]	-	+	the high-affinity ATP-driven potassium transport (or Kdp) system, which catalyzes the hydrolysis of ATP coupled with the electrogenic transport of potassium into the cytoplasm	membrane
WP_012295225.1 MULTISPECIES: 4-hydroxy-3-methylbut-2-enyl diphosphate reductase [Lysinibacillus]	-	+	catalyzes the last step of the methylerythritol phosphate pathway to synthesize isopentenyl diphosphate and dimethylallyl diphosphate.	Cytosolic
WP_012295227.1 MULTISPECIES: sensor histidine kinase [Lysinibacillus]	+	+	sensing external environmental changes	membrane
WP_012295231.1 MULTISPECIES: hypothetical protein [Lysinibacillus]	-	+	Unknown	Unknown
WP_012295240.1 MULTISPECIES: cytochrome c [Lysinibacillus]	-	+	ATP synthesis	Cytosolic (Mitochondria)
WP_012295242.1 MULTISPECIES: RNA polymerase sigma factor RpoD [Lysinibacillus]	-	+	Regulatory	Cytosolic
WP_012295264.1 MULTISPECIES: hypothetical protein [Lysinibacillus]	-	+	Unknown	Unknown
WP_012295268.1 MULTISPECIES: helix-turn-helix transcriptional regulator [Lysinibacillus]	-	+	Regulatory	Cytosolic
WP_012295273.1 MULTISPECIES: phage holin family protein [Lysinibacillus]	+	+	trigger and control the degradation of the host's cell wall at the end of the lytic cycle	Cytosolic
WP_012295278.1 MULTISPECIES: baseplate J/gp47 family protein [Lysinibacillus]	+	+	Component of the baseplate. Probably involved in tail assembly.	Membrane
WP_012295290.1 MULTISPECIES: phage tail protein [Lysinibacillus]	-	+	responsible for recognition of the host cell and for delivery of the phage DNA to the bacterial cytoplasm.
WP_012295309.1 MULTISPECIES: DUF3102 domain-containing protein [Lysinibacillus]	-	+	unknown	Cytosolic
WP_012295328.1 nucleotide exchange factor GrpE [Lysinibacillus fusiformis]	-	+	regulation of protein folding machinery, as well as the heat shock response	Cytosolic
WP_012295333.1 MULTISPECIES: oligoribonuclease [Lysinibacillus]	-	+	degradation of mRNA to mononucleotides	Cytosolic
WP_012295334.1 MULTISPECIES: polysaccharide deacetylase family protein [Lysinibacillus]	-	+	required for bacterial evasion to lysozyme and innate immune responses	Cytosolic
WP_012295382.1 MULTISPECIES: 5'-methylthioadenosine/S-adenosylhomocysteine nucleosidase [Lysinibacillus]	-	+	irreversible cleavage of the glycosidic bond in both 5'-methylthioadenosine (MTA) and S-adenosylhomocysteine (SAH/AdoHcy) to adenine and the corresponding thioribose, 5'-methylthioribose and S-ribosylhomocysteine, respectively	Cytosolic
WP_012295425.1 MULTISPECIES: bifunctional (p)ppGpp synthetase/guanosine-3',5'-bis(diphosphate) 3'-pyrophosphohydrolase [Lysinibacillus]	-	+	mediator of the stringent response that coordinates a variety of cellular activities in response to changes in nutritional abundance	Cytosolic
WP_012295431.1 MULTISPECIES: single-stranded-DNA-specific exonuclease RecJ [Lysinibacillus]	-	+	Regulatory	Cytosolic
WP_012295451.1 MULTISPECIES: Holliday junction branch migration protein RuvA [Lysinibacillus]	-	+	Transportation	Membrane
WP_012295454.1 MULTISPECIES: transcription repressor NadR [Lysinibacillus]	-	+	Regulatory	Cytosolic
WP_012295456.1 MULTISPECIES: prephenate dehydratase [Lysinibacillus]	-	+	catalyses the decarboxylation of prephenate to phenylpyruvate	Cytosolic
WP_012295471.1 MULTISPECIES: Maf family protein [Lysinibacillus]	-	+	transcriptional activator or repressor	Cytosolic
WP_012295495.1 MULTISPECIES: cytochrome aa3 quinol oxidase subunit II [Lysinibacillus]	-	+	reducing O2 to water and harnessing the free energy from the reaction to generate the transmembrane electrochemical potential	Membrane
WP_012295519.1 MULTISPECIES: accessory gene regulator AgrB [Lysinibacillus]	-	+	Regulatory	Cytosolic
WP_012295562.1 MULTISPECIES: succinate dehydrogenase flavoprotein subunit [Lysinibacillus]	-	+	Flavoprotein (FP) subunit of succinate dehydrogenase (SDH) that is involved in complex II of the mitochondrial electron transport chain and is responsible for transferring electrons from succinate to ubiquinone (coenzyme Q)	Cytosolic
WP_012295564.1 MULTISPECIES: YslB family protein [Lysinibacillus]	-	+	unknown	Cytosolic
WP_012295575.1 MULTISPECIES: cell division protein ZapA [Lysinibacillus]	-	+	Activator of cell division through the inhibition of FtsZ GTPase activity	Cytosolic
WP_012295582.1 MULTISPECIES: sensor domain-containing diguanylate cyclase [Lysinibacillus]	-	+	formation of the ubiquitous second messenger, cyclic-di-GMP, involved in bacterial biofilm formation and persistence	Cytosolic
WP_012295594.1 MULTISPECIES: glutaredoxin family protein [Lysinibacillus]	-	+	electron carriers in the glutathione-dependent synthesis of deoxyribonucleotides by the enzyme ribonucleotide reductase	Cytosolic
WP_012295597.1 MULTISPECIES: LysR family transcriptional regulator [Lysinibacillus]	-	+	Reguatory	Cytosolic
WP_012295599.1 MULTISPECIES: thiol-activated cytolysin family protein [Lysinibacillus]	-	+	interference with immune cell function and cytokine induction.	Membrane
WP_012295602.1 MULTISPECIES: translation initiation factor IF-3 [Lysinibacillus]	-	+	Reguatory	Cytosolic
WP_012295611.1 MULTISPECIES: protease modulator HflC [Lysinibacillus]	-	+	stability of phage lambda cII protein, and thereby control the lysogenization frequency of phage lambda	Cytosolic
WP_012295621.1 MULTISPECIES: FxsA family protein [Lysinibacillus]	-	+	Overexpression alleviates the exclusion of phage T7 in cells harboring the F plasmid	Membrane
WP_012295636.1 MULTISPECIES: RDD family protein [Lysinibacillus]	-	+	unknown	Membrane
WP_012295764.1 MULTISPECIES: 2-succinyl-5-enolpyruvyl-6-hydroxy-3-cyclohexene-1-carboxylic-acid synthase [Lysinibacillus]	-	+	menaquinone biosynthesis.	Cytosolic
WP_012295770.1 MULTISPECIES: TraR/DksA C4-type zinc finger protein [Lysinibacillus]	-	+	coiled-coil region binds the RNA polymerase near the ppGpp binding site and could contribute to the stability of the RNA polymerase-ppGpp complex	Cytosolic
WP_012295791.1 MULTISPECIES: GNAT family N-acetyltransferase [Lysinibacillus]	-	+	aminoglycoside antibiotic resistance, transcription regulation, protein acetylation and stress reaction	Cytosolic
WP_012295807.1 MULTISPECIES: succinate CoA transferase [Lysinibacillus]	-	+	Catalyzes the transfer of the CoA moiety from acetyl-CoA to (R)-2-hydroxyglutarate and related compounds like glutaconate.	Cytosolic
WP_012295810.1 MULTISPECIES: DUF1002 domain-containing protein [Lysinibacillus]	-	+	Unknown	Cytosolic
WP_012295816.1 MULTISPECIES: UDP-N-acetylmuramate dehydrogenase [Lysinibacillus]	-	+	Cell wall formation	Membrane
WP_012295819.1 MULTISPECIES: DUF2500 domain-containing protein [Lysinibacillus]	-	+	Unknown	Cytosolic
WP_012295824.1 MULTISPECIES: manganese-dependent inorganic pyrophosphatase [Lysinibacillus]	-	+	Metal Binding	Cytosolic
WP_012295840.1 MULTISPECIES: siderophore ABC transporter substrate-binding protein [Lysinibacillus]	-	+	drive the transport process through binding and hydrolysis of ATP	Membrane
WP_012295862.1 MULTISPECIES: methyl-accepting chemotaxis protein [Lysinibacillus]	-	+	reversible methylation during adaptation of bacterial cells to environmental attractants and repellents	Cytosolic
WP_012295889.1 MULTISPECIES: metal-sensitive transcriptional regulator [Lysinibacillus]	-	+	Reguatory	Cytosolic
WP_012295891.1 MULTISPECIES: Rrf2 family transcriptional regulator [Lysinibacillus]	-	+	Reguatory	Cytosolic
WP_012295892.1 MULTISPECIES: GNAT family N-acetyltransferase [Lysinibacillus]	-	+	aminoglycoside antibiotic resistance, transcription regulation, protein acetylation and stress reaction	Cytosolic
WP_012295916.1 MULTISPECIES: BCCT family transporter [Lysinibacillus]	-	+	transport molecules with a quaternary ammonium group	Membrane
WP_012295923.1 MULTISPECIES: DinB family protein [Lysinibacillus]	-	+	Metal Binding	Cytosolic
WP_012295978.1 MULTISPECIES: AI-2E family transporter [Lysinibacillus]	-	+	mediate transport of the quorum-sensing signal autoinducer 2 (AI-2)	Membrane
WP_012295985.1 MULTISPECIES: Rrf2 family transcriptional regulator [Lysinibacillus]	-	+	Reguatory	Cytosolic
WP_012295986.1 MULTISPECIES: cupin domain-containing protein [Lysinibacillus]	-	+	Reguatory	Cytosolic
WP_012296006.1 MULTISPECIES: TraB/GumN family protein [Lysinibacillus]	-	+	inhibitor peptide that may act as a protease to inactivate the mating pheromone	Membrane
WP_012296018.1 MULTISPECIES: response regulator transcription factor [Lysinibacillus]	-	+	Reguatory	Cytosolic
WP_012296032.1 MULTISPECIES: phosphoglucosamine mutase [Lysinibacillus]	-	+	Catalyzes the conversion of glucosamine-6-phosphate to glucosamine-1-phosphate.	Cytosolic
WP_012296034.1 MULTISPECIES: CdaR family protein [Lysinibacillus]	-	+	diadenylate cyclase activity of CdaA a	Cytosolic
WP_012296048.1 MULTISPECIES: energy-coupling factor transporter transmembrane protein EcfT [Lysinibacillus]	-	+	Transmembrane (T) component of an energy-coupling factor (ECF) ABC-transporter complex	Membrane
WP_012296108.1 MULTISPECIES: 23S rRNA pseudouridine(2604) synthase RluF [Lysinibacillus]	-	+	Reguatory	Cytosolic
WP_012296123.1 MULTISPECIES: RNA ligase family protein [Lysinibacillus]	-	+	Reguatory	Cytosolic
WP_012296161.1 MULTISPECIES: GntR family transcriptional regulator [Lysinibacillus]	-	+	Reguatory	Cytosolic
WP_012296168.1 MULTISPECIES: peptidylprolyl isomerase [Lysinibacillus]	-	+	Catalyzes the cis-trans isomerization of proline imidic peptide bonds in oligopeptides	Cytosolic
WP_012296179.1 MULTISPECIES: LysM peptidoglycan-binding and 3D domain-containing protein [Lysinibacillus]	-	+	peptidoglycne binding	Membrane
WP_012296211.1 MULTISPECIES: 30S ribosomal protein S18 [Lysinibacillus]	-	+	Reguatory	Cytosolic
WP_016992305.1 MULTISPECIES: 23S rRNA (pseudouridine(1915)-N(3))-methyltransferase RlmH [Lysinibacillus]	-	+	Reguatory	Cytosolic
WP_016994084.1 MULTISPECIES: type I DNA topoisomerase [Lysinibacillus]	-	+	Reguatory	Cytosolic
WP_024363077.1 MULTISPECIES: excalibur calcium-binding domain-containing protein [Lysinibacillus]	-	+	Reguatory	Cytosolic
WP_024363204.1 MULTISPECIES: glutamyl-tRNA reductase [Lysinibacillus]	-	+	Reguatory	Cytosolic
WP_024363854.1 MULTISPECIES: ribonuclease HIII [Lysinibacillus]	-	+	Reguatory	Cytosolic
WP_024363933.1 MULTISPECIES: co-chaperone GroES [Lysinibacillus]	-	+	proteins folding	Cytosolic
WP_025114538.1 MULTISPECIES: MarR family transcriptional regulator [Lysinibacillus]	+	+	Reguatory	Cytosolic
WP_025116632.1 MULTISPECIES: glycine cleavage system protein GcvH [Lysinibacillus]	-	+	glycine degradation	Cytosolic
WP_025218805.1 MULTISPECIES: 1-deoxy-D-xylulose-5-phosphate reductoisomerase [Lysinibacillus]	-	+	catalyzes the NADP-dependent rearrangement and reduction of 1-deoxy-D-xylulose-5-phosphate (DXP) to 2-C-methyl-D-erythritol 4-phosphate (MEP)	Cytosolic
WP_025219450.1 MULTISPECIES: transcriptional regulator YeiL [Lysinibacillus]	-	+	Reguatory	Cytosolic
WP_031415838.1 MULTISPECIES: spore protease YyaC [Lysinibacillus]	-	+	extracellular proteolytic activity	Spore
WP_031415994.1 MULTISPECIES: sugar phosphate isomerase/epimerase [Lysinibacillus]	-	+	Metabolism	Cytosolic
WP_031416080.1 MULTISPECIES: EAL domain-containing protein [Lysinibacillus]	-	+	Unknown	Cytosolic
WP_031416242.1 MULTISPECIES: acetolactate synthase small subunit [Lysinibacillus]	-	+	catalyzes the condensation of pyruvate with either a second pyruvate resulting in α-acetolactate or α-ketobutyrate resulting in α-acetohydroxybutyrate leading eventually to the respective production of valine and isoleucine	Cytosolic
WP_031416319.1 MULTISPECIES: tRNA (adenosine(37)-N6)-threonylcarbamoyltransferase complex dimerization subunit type 1 TsaB [Lysinibacillus]	-	+	Reguatory	Cytosolic
WP_031416415.1 MULTISPECIES: FAD-binding protein [Lysinibacillus]	-	+	Reguatory	Cytosolic
WP_031416445.1 MULTISPECIES: IclR family transcriptional regulator [Lysinibacillus]	-	+	Reguatory	Cytosolic
WP_031416517.1 MULTISPECIES: GNAT family N-acetyltransferase [Lysinibacillus]	-	+	aminoglycoside antibiotic resistance, transcription regulation, protein acetylation and stress reaction	Cytosolic
WP_031416547.1 MULTISPECIES: M20 peptidase aminoacylase family protein [Lysinibacillus]	-	+	leaving, and thereby often inactivating, small peptides	Cytosolic
WP_031416589.1 MULTISPECIES: FosM family fosfomycin resistance protein [Lysinibacillus]	-	+	essential for antibiotic activity, and intrinsic resistance to the antibiotic in some pathogenic species is caused by the lack of transport	Membrane
WP_031416590.1 MULTISPECIES: ribosome small subunit-dependent GTPase A [Lysinibacillus]	-	+	Reguatory	Cytosolic
WP_031416778.1 MULTISPECIES: nucleotidyltransferase domain-containing protein [Lysinibacillus]	-	+	Reguatory	Cytosolic
WP_031416868.1 MULTISPECIES: fumarate hydratase [Lysinibacillus]	-	+	TCA cycle & catalyzes the stereospecific interconversion of fumarate to L-malate.	Cytosolic
WP_031416904.1 MULTISPECIES: nucleotidyltransferase-like protein [Lysinibacillus]	-	+	synthesis of the bulk of cellular RNA	Cytosolic (Nucleus)
WP_031417025.1 MULTISPECIES: HD domain-containing protein [Lysinibacillus]	-	+	phosphohydrolase activity	Cytosolic
WP_031417059.1 MULTISPECIES: pyridoxal-dependent decarboxylase [Lysinibacillus]	-	+	serves as an electron sink to delocalize the unbounded electrons and to orientate enzyme-substrate in a specific orientation	Cytosolic
WP_031417454.1 MULTISPECIES: adenosylmethionine--8-amino-7-oxononanoate transaminase [Lysinibacillus]	-	+	transfer of the alpha-amino group from S-adenosyl-L-methionine (SAM) to 7-keto-8-aminopelargonic acid (KAPA) to form 7,8-diaminopelargonic acid (DAPA)	Cytosolic
WP_031417481.1 MULTISPECIES: (2Fe-2S) ferredoxin domain-containing protein [Lysinibacillus]	-	+	subunits of photosynthetic and respiratory electron transfer complexes, as well as subunits or domains in water soluble oxidases.	Cytosolic
WP_031417705.1 MULTISPECIES: Fe-S cluster assembly protein SufB [Lysinibacillus]	-	+	contributes to the assembly or repair of oxygen-labile iron-sulfur clusters under oxidative stress	Membrane
WP_031417788.1 MULTISPECIES: type I glyceraldehyde-3-phosphate dehydrogenase [Lysinibacillus]	-	+	catalyzes the conversion of glyceraldehyde 3-phosphate to glycerate-1, 3-biphosphate, and results in production of NADH	Cytosolic
WP_031417798.1 MULTISPECIES: tetratricopeptide repeat protein [Lysinibacillus]	-	+	encodes an intraflagellar transport component-A, IFT139,	Membrane
WP_031417807.1 MULTISPECIES: HPr(Ser) kinase/phosphatase [Lysinibacillus]	-	+	phoshocarrier	Membrane
WP_031417935.1 MULTISPECIES: MmcQ/YjbR family DNA-binding protein [Lysinibacillus]	-	+	transcription factors which modulate the process of transcription	Cytosolic
WP_031417971.1 MULTISPECIES: stage IV sporulation protein A [Lysinibacillus]	-	+	morphogenesis of the spore coat outer layers	Spore
WP_031417989.1 MULTISPECIES: nucleotide pyrophosphohydrolase [Lysinibacillus]	-	+	Involved in the regulation of bacterial cell survival under conditions of nutritional stress	Cytosolic
WP_031417990.1 MULTISPECIES: 4-hydroxy-tetrahydrodipicolinate reductase [Lysinibacillus]	-	+	critical for the production of lysine and meso-diaminopimelate	Cytosolic
WP_031418044.1 MULTISPECIES: malate synthase A [Lysinibacillus]	-	+	the bacteria to assimilate acetyl-CoA into long-chain carbohydrates and survive in harsh environments	Cytosolic
WP_031418107.1 MULTISPECIES: CoA transferase [Lysinibacillus]	-	+	Catalyzes the transfer of the CoA moiety from acetyl-CoA to (R)-2-hydroxyglutarate and related compounds like glutaconate.	Cytosolic
WP_031418133.1 MULTISPECIES: nicotinate-nucleotide adenylyltransferase [Lysinibacillus]	-	+	biosynthesis of the NAD cofacto	Cytosolic
WP_031418171.1 MULTISPECIES: S41 family peptidase [Lysinibacillus]	-	+	important for the degradation of incorrectly synthesized proteins	Cytosolic
WP_031418189.1 MULTISPECIES: transporter substrate-binding domain-containing protein [Lysinibacillus]	-	+	Transport	Membrane
WP_031418198.1 MULTISPECIES: DinB family protein [Lysinibacillus]	-	+	Metal Binding	Cytosolic
WP_031418282.1 MULTISPECIES: uroporphyrinogen decarboxylase [Lysinibacillus]	-	+	heme biosynthesis	Cytosolic
WP_031418337.1 MULTISPECIES: LysE family translocator [Lysinibacillus]	-	+	catalyze export of amino acids, lipids and heavy metal ions	Membrane
WP_031418351.1 MULTISPECIES: LysM peptidoglycan-binding and 3D domain-containing protein [Lysinibacillus]	-	+	peptidoglycne binding	Membrane
WP_031418523.1 MULTISPECIES: DEAD/DEAH box helicase [Lysinibacillus]	-	+	RNA metabolism (ATP binding, hydrolase activity, nucleic acid binding, RNA helicase activity)	Cytosolic
WP_031418636.1 MULTISPECIES: FtsH protease activity modulator HflK [Lysinibacillus]	-	+	help govern the stability of phage lambda cII protein, and thereby control the lysogenization frequency of phage lambda	Membrane
WP_031418723.1 MULTISPECIES: competence protein ComK [Lysinibacillus]	-	+	binds to competence promoters and appears to activate their transcription	Cytosolic
WP_031418765.1 MULTISPECIES: RluA family pseudouridine synthase [Lysinibacillus]	-	+	Pseudouridine synthases catalyse the isomerisation of uridine to pseudouridine	Cytosolic
WP_031418848.1 MULTISPECIES: dicarboxylate/amino acid:cation symporter [Lysinibacillus]	-	+	Transport	Membrane
WP_031418918.1 MULTISPECIES: UDP-N-acetylmuramoyl-L-alanine--D-glutamate ligase [Lysinibacillus]	-	+	a cytoplasmic enzyme involved in the biosynthesis of peptidoglycan which catalyzes the addition of D-glutamate to the nucleotide precursor UDP-N-acetylmuramoyl-L-alanine (UMA).	Cytosolic
WP_031418922.1 MULTISPECIES: cell division protein FtsZ [Lysinibacillus]	-	+	Activator of cell division through the inhibition of FtsZ GTPase activity	Cytosolic
WP_031418938.1 MULTISPECIES: orotate phosphoribosyltransferase [Lysinibacillus]	-	+	catalyzes the formation of orotidine 5'-monophosphate (OMP) from orotate and phosphoribosyl pyrophosphate	Cytosolic
WP_031419221.1 MULTISPECIES: DNA polymerase III subunit delta [Lysinibacillus]	-	+	Reguatory	Cytosolic
WP_031419233.1 MULTISPECIES: transcription elongation factor GreA [Lysinibacillus]	-	+	Reguatory	Cytosolic
WP_031419256.1 MULTISPECIES: tRNA threonylcarbamoyladenosine dehydratase [Lysinibacillus]	-	+	Reguatory	Cytosolic
WP_031419266.1 MULTISPECIES: SIS domain-containing protein [Lysinibacillus]	-	+	phosphosugar isomerization	Cytosolic
WP_031419288.1 MULTISPECIES: DUF421 domain-containing protein [Lysinibacillus]	-	+	Unknown	Cytosolic
WP_031419385.1 MULTISPECIES: AMP-binding protein [Lysinibacillus]	-	+	catalyzes the formation of acetyl-CoA from acetate and CoA	Cytosolic
WP_031419480.1 MULTISPECIES: MBL fold metallo-hydrolase [Lysinibacillus]	-	+	nactivate beta-lactam antibiotics by hydrolyzing the peptide bond of the characteristic four-membered beta-lactam ring rendering the antibiotic ineffective	Cytosolic
WP_031419566.1 MULTISPECIES: LysR family transcriptional regulator [Lysinibacillus]	-	+	Reguatory	Cytosolic
WP_031419593.1 MULTISPECIES: sulfite exporter TauE/SafE family protein [Lysinibacillus]	-	+	transport of anions across the cytoplasmic membrane	Membrane
WP_031419640.1 MULTISPECIES: UDP-N-acetylmuramoyl-tripeptide--D-alanyl-D-alanine ligase [Lysinibacillus]	-	+	Catalyzes the final step in the synthesis of UDP-N-acetylmuramoyl-pentapeptide, the precursor of murein	Cytosolic
WP_031419728.1 MULTISPECIES: phosphoenolpyruvate--protein phosphotransferase [Lysinibacillus]	-	+	mediates transport and phosphorylation of selected sugars	Membrane
WP_031419736.1 MULTISPECIES: response regulator transcription factor [Lysinibacillus]	-	+	Reguatory	Cytosolic
WP_031419862.1 MULTISPECIES: methyl-accepting chemotaxis protein [Lysinibacillus]	-	+	process environmental and intracellular sensory (input) signals and alter the activity of the CheA histidine kinase	Membrane
WP_036074957.1 MULTISPECIES: SecY-interacting protein Syd [Lysinibacillus]	-	+	Reguatory	Cytosolic
WP_036120740.1 MULTISPECIES: phBC6A51 family helix-turn-helix protein [Lysinibacillus]	-	+	Reguatory	Cytosolic
WP_036121394.1 MULTISPECIES: translation initiation factor IF-2 [Lysinibacillus]	-	+	Reguatory	Cytosolic
WP_036125576.1 MULTISPECIES: threonine--tRNA ligase [Lysinibacillus]	-	+	Reguatory	Cytosolic
WP_036127167.1 MULTISPECIES: Nif3-like dinuclear metal center hexameric protein [Lysinibacillus]	-	+	unknown	Cytosolic
WP_036128254.1 MULTISPECIES: cell division protein ZapA [Lysinibacillus]	-	+	Activator of cell division through the inhibition of FtsZ GTPase activity	Cytosolic
WP_036160348.1 MULTISPECIES: TatD family hydrolase [Lysinibacillus]	-	+	uncharacterized	Cytosolic
WP_036160366.1 MULTISPECIES: aldehyde dehydrogenase family protein [Lysinibacillus]	-	+	converts acyl-CoA to aldehyde and CoA	Cytosolic
WP_036160563.1 MULTISPECIES: leucyl aminopeptidase [Lysinibacillus]	-	+	cleave N-terminal residues from proteins and peptides	Cytosolic
WP_036160581.1 MULTISPECIES: LytTR family transcriptional regulator [Lysinibacillus]	-	+	Regulatory	Cytosolic
WP_036160584.1 MULTISPECIES: DUF5050 domain-containing protein [Lysinibacillus]	-	+	Unknown	Membrane
WP_036160615.1 MULTISPECIES: HAMP domain-containing histidine kinase [Lysinibacillus]	-	+	central signal converters in bacterial chemotaxis receptors and chemosensory histidine kinases	Membrane
WP_036160622.1 MULTISPECIES: APC family permease [Lysinibacillus]	-	+	Transport	Membrane
WP_036160686.1 MULTISPECIES: acyl-CoA dehydrogenase family protein [Lysinibacillus]	+	+	Metabolism	Cytosolic
WP_036160701.1 MULTISPECIES: AAA domain-containing protein [Lysinibacillus]	-	+	mechanoenzymes that manipulate the structure of substrate proteins and thereby unfold them or disassemble protein complexes	Cytosolic
WP_036160729.1 MULTISPECIES: NAD(P)/FAD-dependent oxidoreductase [Lysinibacillus]	-	+	Metabolism	Cytosolic
WP_036160806.1 MULTISPECIES: methyl-accepting chemotaxis protein [Lysinibacillus]	-	+	process environmental and intracellular sensory (input) signals and alter the activity of the CheA histidine kinase	Membrane
WP_036160943.1 MULTISPECIES: aspartate carbamoyltransferase catalytic subunit [Lysinibacillus]	-	+	Metabolism	Cytosolic
WP_036160980.1 MULTISPECIES: glycerol-3-phosphate dehydrogenase/oxidase [Lysinibacillus]	-	+	Metabolism	Cytosolic
WP_036161060.1 MULTISPECIES: aldehyde dehydrogenase family protein [Lysinibacillus]	-	+	responsible for the NAD(P)-dependent oxidation of aldehydes to carboxylic acids, participating in detoxification, biosynthesis, antioxidant and regulatory functions	Cytosolic
WP_036161090.1 MULTISPECIES: YwhD family protein [Lysinibacillus]	-	+	Unknown	Cytosolic
WP_036161113.1 MULTISPECIES: BMP family ABC transporter substrate-binding protein [Lysinibacillus]	-	+	onvert the energy gained from ATP hydrolysis into trans-bilayer movement of substrates either into the cytoplasm (import) or out of the cytoplasm (export).	Membrane
WP_036161116.1 MULTISPECIES: PTS sugar transporter subunit IIA [Lysinibacillus]	-	+	binds and inhibits the lactose transporter (LacY) and prevents uptake of lactose	Membrane
WP_036161204.1 MULTISPECIES: histidine phosphatase family protein [Lysinibacillus]	-	+	metabolic regulations, intermediary metabolism and developmental processes.	Cytosolic
WP_036161220.1 MULTISPECIES: asparagine--tRNA ligase [Lysinibacillus]	-	+	Regulatory	Cytosolic
WP_036161240.1 MULTISPECIES: AraC family transcriptional regulator [Lysinibacillus]	-	+	binds to the target DNA and regulates bacterial virulence by sensing small molecule inducers such as urea, bicarbonate, or cellobiose	Cytosolic
WP_036161253.1 MULTISPECIES: malate dehydrogenase [Lysinibacillus]	-	+	catalyzes the interconversion between malate and oxaloacetate using NAD+ or NADP+ as a cofactor	Cytosolic
WP_036161338.1 MULTISPECIES: HAMP domain-containing histidine kinase [Lysinibacillus]	-	+	central signal converters in bacterial chemotaxis receptors and chemosensory histidine kinases	Membrane
WP_036161355.1 MULTISPECIES: ABC transporter ATP-binding protein [Lysinibacillus]	-	+	onvert the energy gained from ATP hydrolysis into trans-bilayer movement of substrates either into the cytoplasm (import) or out of the cytoplasm (export).	Membrane
WP_036161419.1 MULTISPECIES: isochorismatase family protein [Lysinibacillus]	-	+	Metabolism:catalyzes the hydrolysis of isochorismate into 2,3-dihydro-2,3-dihydroxybenzoate and pyruvate	Cytosolic
WP_036161500.1 MULTISPECIES: NUDIX pyrophosphatase [Lysinibacillus]	-	+	clearing the cell of potentially deleterious metabolites and in preventing the accumulation of metabolic intermediates	Cytosolic
WP_036161513.1 MULTISPECIES: arsenite efflux transporter metallochaperone ArsD [Lysinibacillus]	-	+	negative regulation of transcription	Cytosolic
WP_036161519.1 MULTISPECIES: aspartate aminotransferase family protein [Lysinibacillus]	-	+	catalyzes the reversible transfer of an α-amino group between aspartate and glutamate	Cytosolic
WP_036161571.1 MULTISPECIES: class I SAM-dependent rRNA methyltransferase [Lysinibacillus]	-	+	utilize the ubiquitous methyl donor SAM as a cofactor to methylate proteins, small molecules, lipids, and nucleic acids	Cytosolic
WP_036161575.1 MULTISPECIES: diadenosine tetraphosphate hydrolase [Lysinibacillus]	-	+	regulates levels of signalling molecules like Ap4A by hydrolyzing them to ATP and AMP	Membrane
WP_036161592.1 MULTISPECIES: GNAT family N-acetyltransferase [Lysinibacillus]	-	+	aminoglycoside antibiotic resistance, transcription regulation, protein acetylation and stress reaction	Cytosolic
WP_036161628.1 MULTISPECIES: 2-oxoglutarate dehydrogenase E1 component [Lysinibacillus]	-	+	catalyzes the decarboxylation of 2-oxoglutarate	Cytosolic
WP_036161631.1 MULTISPECIES: DUF1232 domain-containing protein [Lysinibacillus]	-	+	Unknown	Membrane
WP_036161644.1 MULTISPECIES: LytTR family transcriptional regulator [Lysinibacillus]	-	+	Regulatory	Cytosolic
WP_036161675.1 MULTISPECIES: proline--tRNA ligase [Lysinibacillus]	-	+	Regulatory	Cytosolic
WP_036161751.1 MULTISPECIES: 5-methyltetrahydropteroyltriglutamate--homocysteine S-methyltransferase [Lysinibacillus]	-	+	Catalyzes the transfer of a methyl group from 5-methyltetrahydrofolate to homocysteine resulting in methionine formation	Cytosolic
WP_036161804.1 MULTISPECIES: aconitate hydratase AcnA [Lysinibacillus]	-	+	RNA-binding regulatory protein which plays a role as a maintenance or survival enzyme during nutritional or oxidative stress	Cytosolic
WP_036161832.1 MULTISPECIES: VOC family protein [Lysinibacillus]	+	+	catalyse reactions with a common mechanistic attribute that is enabled by certain conserved active site residues	Cytosolic
WP_036161876.1 MULTISPECIES: DNA alkylation repair protein [Lysinibacillus]	-	+	Regulatory	Cytosolic
WP_036161906.1 MULTISPECIES: Rrf2 family transcriptional regulator [Lysinibacillus]	-	+	Regulatory: vital molecules in the control of gene expression, directly controling when, where and the degree to which genes are expressed	Cytosolic
WP_036161912.1 MULTISPECIES: MerR family transcriptional regulator [Lysinibacillus]	-	+	regulates the conversion of DNA to RNA (transcription), thereby orchestrating gene activity	Cytosolic
WP_036161931.1 MULTISPECIES: polysaccharide deacetylase family protein [Lysinibacillus]	-	+	required for bacterial evasion to lysozyme and innate immune responses	Cytosolic
WP_036161937.1 MULTISPECIES: DUF3995 domain-containing protein [Lysinibacillus]	-	+	Unknown	Membrane
WP_036161943.1 MULTISPECIES: AAA family ATPase [Lysinibacillus]	-	+	control of protein homeostasis, DNA replication, recombination, chromatin remodeling, ribosomal RNA processing, molecular targeting	Cytosolic
WP_036162009.1 MULTISPECIES: HAMP domain-containing histidine kinase [Lysinibacillus]	-	+	central signal converters in bacterial chemotaxis receptors and chemosensory histidine kinases.	Membrane
WP_036162024.1 MULTISPECIES: iron-containing alcohol dehydrogenase [Lysinibacillus]	-	+	metabolism	Cytosolic
WP_036162141.1 MULTISPECIES: potassium-transporting ATPase subunit KdpA [Lysinibacillus]	-	+	binds and transports the potassium across the cytoplasmic membrane	Membrane
WP_036162144.1 MULTISPECIES: 4-hydroxy-3-methylbut-2-enyl diphosphate reductase [Lysinibacillus]	-	+	catalyzes the last step of the methylerythritol phosphate pathway to synthesize isopentenyl diphosphate and dimethylallyl diphosphate.	Cytosolic
WP_036162193.1 MULTISPECIES: tRNA (N(6)-L-threonylcarbamoyladenosine(37)-C(2))-methylthiotransferase MtaB [Lysinibacillus]	-	+	Catalyzes the methylthiolation of N6-threonylcarbamoyladenosine (t6A), leading to the formation of 2-methylthio-N6-threonylcarbamoyladenosine (ms2t6A)	Cytosolic
WP_036162221.1 MULTISPECIES: ATP-dependent RecD-like DNA helicase [Lysinibacillus]	-	+	Regulatory	Cytosolic
WP_036162247.1 MULTISPECIES: GTPase ObgE [Lysinibacillus]	-	+	ribosome assembly and stringent response	Cytosolic
WP_036162264.1 MULTISPECIES: PQQ-dependent sugar dehydrogenase [Lysinibacillus]	-	+	anabolism, for the generation of reducing equivalents and in the production of precursors for the synthesis of key cell constituents	Cytosolic
WP_036162343.1 MULTISPECIES: amidohydrolase family protein [Lysinibacillus]	-	+	primarily involved in nonhydrolytic C-C bond cleavage	Cytosolic
WP_036162363.1 MULTISPECIES: bifunctional 2',3'-cyclic-nucleotide 2'-phosphodiesterase/3'-nucleotidase [Lysinibacillus]	-	+	catalyzes two consecutive reactions during ribonucleic acid degradation	Membrane
WP_036162408.1 MULTISPECIES: DUF2238 domain-containing protein [Lysinibacillus]	-	+	Unknown	Membrane
WP_036162469.1 MULTISPECIES: gluconokinase [Lysinibacillus]	-	+	metabolism	Cytosolic
WP_036162489.1 MULTISPECIES: cell wall metabolism sensor histidine kinase WalK [Lysinibacillus]	+	+	coordinates cell wall remodeling with cell division in Gram-positive bacteria by controlling the transcription of genes for autolysins and their inhibitors	Membrane
WP_036162495.1 MULTISPECIES: D-alanyl-D-alanine carboxypeptidase [Lysinibacillus]	-	+	trimming the carboxy-terminal D-alanyl residues from peptidoglycan pentapeptides	Membrane
WP_036162500.1 MULTISPECIES: tRNA adenosine(34) deaminase TadA [Lysinibacillus]	-	+	Regulatory	Cytosolic
WP_036162548.1 MULTISPECIES: xanthine phosphoribosyltransferase [Lysinibacillus]	-	+	Converts the preformed base xanthine, a product of nucleic acid breakdown, to xanthosine 5'-monophosphate (XMP)	Cytosolic
WP_036162559.1 MULTISPECIES: DNA topoisomerase III [Lysinibacillus]	-	+	Regulatory	Cytosolic
WP_036162599.1 MULTISPECIES: fibronectin-binding domain-containing protein [Lysinibacillus]	-	+	binding to ECM components such as collagen and laminin	Membrane
WP_036162813.1 MULTISPECIES: N-acyl homoserine lactonase family protein [Lysinibacillus]	-	+	degrading signal molecules involved in bacterial quorum sensing	Membrane
WP_036162950.1 MULTISPECIES: response regulator transcription factor [Lysinibacillus]	-	+	Regulatory	Cytosolic
WP_036220157.1 MULTISPECIES: tail fiber protein [Lysinibacillus]	-	+	responsible for the specific, albeit reversible primary attachment to host cell	Membrane
WP_036220980.1 MULTISPECIES: ABC transporter permease [Lysinibacillus]	-	+	contribute to drug resistance via ATP-dependent drug efflux pumps	Membrane
WP_036221298.1 MULTISPECIES: DUF1510 family protein [Lysinibacillus]	-	+	Unknown	Membrane
WP_036221872.1 MULTISPECIES: RNA-splicing ligase RtcB [Lysinibacillus]	-	+	Regulation	Cytosolic
WP_036222500.1 MULTISPECIES: methyl-accepting chemotaxis protein [Lysinibacillus]	-	+	chemotaxis signal transduction cascade that process environmental and intracellular sensory (input) signals and alter the activity of the CheA histidine kinase.	Membrane
WP_036223767.1 MULTISPECIES: cardiolipin synthase [Lysinibacillus]	-	+	catalyzes the synthesis of cardiolipin, a phospholipid component of mitochondrial membranes that is critical for mitochondrial function	Cytosolic
WP_036224392.1 MULTISPECIES: hydroxymethylglutaryl-CoA reductase, degradative [Lysinibacillus]	-	+	the rate-controlling enzyme of the mevalonate pathway, responsible for cholesterol and other isoprenoid biosynthesis	Cytosolic
WP_036225348.1 MULTISPECIES: phosphate propanoyltransferase [Lysinibacillus]	-	+	involved in the pathway 1,2-propanediol degradation	Cytosolic
WP_036226253.1 MULTISPECIES: extracellular solute-binding protein [Lysinibacillus]	-	+	chemotaxis, transmembrane transport, and facilitating sensory transduction pathways	Membrane
WP_038509878.1 MULTISPECIES: DnaD domain protein [Lysinibacillus]	-	+	regulatory	Cytosolic
WP_048391937.1 MULTISPECIES: extracellular solute-binding protein [Lysinibacillus]	-	+	chemotaxis, transmembrane transport, and facilitating sensory transduction pathways	Membrane
WP_048394090.1 MULTISPECIES: alpha/beta hydrolase-fold protein [Lysinibacillus]	-	+	Hydrolase activity	Cytosolic
WP_051563170.1 MULTISPECIES: S-layer protein [Lysinibacillus]	-	+	maintenance of cell integrity, enzyme display and, in pathogens and commensals, interaction with the host and its immune system	Membrane
WP_051563180.1 MULTISPECIES: M23 family metallopeptidase [Lysinibacillus]	-	+	activate the water molecule in order to carry out their catalytic action on peptide bonds by nucleophilic attack	Cytosolic
WP_051563193.1 MULTISPECIES: serine hydrolase [Lysinibacillus]	-	+	cleave peptide bonds in proteins	Cytosolic
WP_051563204.1 MULTISPECIES: S-layer homology domain-containing protein [Lysinibacillus]	-	+	maintenance of cell integrity, enzyme display and, in pathogens and commensals, interaction with the host and its immune system	Membrane
WP_051563234.1 MULTISPECIES: spore germination protein [Lysinibacillus]	+	+	Germination of spores	Core Spore membrane
WP_051563246.1 MULTISPECIES: tetratricopeptide repeat protein [Lysinibacillus]	-	+	encodes an intraflagellar transport component-A, IFT139,	Membrane
WP_051563308.1 MULTISPECIES: amidohydrolase [Lysinibacillus]	-	+	cytosine degradation, atrazine degradation	Cytosolic
WP_051998115.1 MULTISPECIES: tyrosine-type recombinase/integrase [Lysinibacillus]	-	+	rearrange DNA duplexes by means of conservative site-specific recombination reactions	Cytosolic
WP_051998236.1 MULTISPECIES: S-layer homology domain-containing protein [Lysinibacillus]	-	+	maintenance of cell integrity, enzyme display and, in pathogens and commensals, interaction with the host and its immune system	Membrane
WP_053592564.1 MULTISPECIES: DNA ligase D [Lysinibacillus]	-	+	regulatory	Cytosolic
WP_053595650.1 MULTISPECIES: zinc-ribbon domain-containing protein [Lysinibacillus]	-	+	regulatory	Cytosolic
WP_053596489.1 MULTISPECIES: arginine--tRNA ligase [Lysinibacillus]	-	+	regulatory	Cytosolic
WP_053596738.1 MULTISPECIES: glutamyl-tRNA reductase [Lysinibacillus]	-	+	regulatory	Cytosolic
WP_053596778.1 MULTISPECIES: stalk domain-containing protein [Lysinibacillus]	-	+	F activation and a specific connecting region between the receptor binding globular head and the fusion-activating stalk domain is required for transmitting the fusion signal	Membrane
WP_053597072.1 MULTISPECIES: 1-deoxy-D-xylulose-5-phosphate synthase [Lysinibacillus]	-	+	Catalyzes the acyloin condensation reaction between C atoms 2 and 3 of pyruvate and glyceraldehyde 3-phosphate	Cytosolic
WP_054549167.1 MULTISPECIES: DNA repair protein RecN [Lysinibacillus]	-	+	regulatory	Cytosolic
WP_054549827.1 MULTISPECIES: MFS transporter [Lysinibacillus]	+	+	Transporter	Membrane
WP_054550032.1 MULTISPECIES: tRNA preQ1(34) S-adenosylmethionine ribosyltransferase-isomerase QueA [Lysinibacillus]	-	+	regulatory	Cytosolic
WP_054550251.1 MULTISPECIES: transcriptional regulator YeiL [Lysinibacillus]	-	+	regulatory	Cytosolic
WP_054611246.1 MULTISPECIES: 50S ribosomal protein L31 [Lysinibacillus]	-	+	regulatory	Cytosolic
WP_054611963.1 MULTISPECIES: glycerol-3-phosphate responsive antiterminator [Lysinibacillus]	-	+	regulatory	Cytosolic
WP_058844032.1 MULTISPECIES: DNA repair protein RecN [Lysinibacillus]	-	+	regulatory	Cytosolic
WP_058844051.1 MULTISPECIES: histidine--tRNA ligase [Lysinibacillus]	-	+	regulatory	Cytosolic
WP_058844131.1 MULTISPECIES: tyrosine--tRNA ligase [Lysinibacillus]	-	+	regulatory	Cytosolic
WP_058845003.1 MULTISPECIES: stalk domain-containing protein [Lysinibacillus]	-	+	F activation and a specific connecting region between the receptor binding globular head and the fusion-activating stalk domain is required for transmitting the fusion signal	Membrane
WP_058845049.1 MULTISPECIES: SulP family inorganic anion transporter [Lysinibacillus]	-	+	Transportation	Membrane
WP_058845050.1 MULTISPECIES: leucine--tRNA ligase [Lysinibacillus]	-	+	regulatory	Cytosolic
WP_063389783.1 MULTISPECIES: YheC/YheD family protein [Lysinibacillus]	-	+	Protection of spores	Cytosolic
WP_063389793.1 MULTISPECIES: LrgB family protein [Lysinibacillus]	-	+	Inhibits the expression or activity of extracellular murein hydrolases	Membrane
WP_068983091.1 MULTISPECIES: recombinase RecA [Lysinibacillus]	-	+	promoting the central steps of DNA pairing and strand exchange in genetic recombination and recombinational DNA repair	Cytosolic
WP_068983596.1 MULTISPECIES: Nif3-like dinuclear metal center hexameric protein [Lysinibacillus]	-	+	Unknown	Cytosolic
WP_068983637.1 MULTISPECIES: heat-inducible transcriptional repressor HrcA [Lysinibacillus]	-	+	egatively regulates the transcription of dnaK and groE operons by binding the upstream CIRCE	Cytosolic
WP_068983930.1 MULTISPECIES: cell division protein ZapA [Lysinibacillus]	-	+	Regulatory	Cytosolic
WP_068984209.1 MULTISPECIES: arginine--tRNA ligase [Lysinibacillus]	-	+	Regulatory	Cytosolic
WP_068986561.1 MULTISPECIES: cysteine--tRNA ligase [Lysinibacillus]	-	+	Regulatory	Cytosolic
WP_079560488.1 MULTISPECIES: ribosome recycling factor [Lysinibacillus]	-	+	Regulatory	Cytosolic
WP_079561670.1 MULTISPECIES: TIGR01212 family radical SAM protein [Lysinibacillus]	-	+	unknown	Cytosolic
WP_080695228.1 MULTISPECIES: DUF2639 domain-containing protein [Lysinibacillus]	-	+	unknown	Cytosolic
WP_081010925.1 MULTISPECIES: amidase family protein [Lysinibacillus]	-	+	catalyze the hydrolysis of an amide, leading to the formation of carboxylic acid and ammonia, play a role in important metabolic processes	Cytosolic
WP_089986081.1 MULTISPECIES: vitamin B12-dependent ribonucleotide reductase [Lysinibacillus]	-	+	mediates the synthesis of deoxyribonucleotides, the DNA precursors, for DNA synthesis	Cytosolic
WP_096365590.1 MULTISPECIES: decarboxylating NADP(+)-dependent phosphogluconate dehydrogenase [Lysinibacillus]	-	+	atalyzes the oxidative decarboxylation of 6-phosphogluconate to ribulose 5-phosphate and CO2, with concomitant reduction of NADP to NADPH.	Cytosolic
WP_099805356.1 MULTISPECIES: polyprenyl synthetase family protein [Lysinibacillus]	-	+	Isoprenoid biosynthesis	Cytosolic
WP_100545006.1 MULTISPECIES: ribosome biogenesis GTP-binding protein YihA/YsxC [Lysinibacillus]	-	+	Regulatory	Cytosolic
WP_103118620.1 MULTISPECIES: ribonuclease HIII [Lysinibacillus]	-	+	Regulatory	Cytosolic
WP_103118646.1 MULTISPECIES: dephospho-CoA kinase [Lysinibacillus]	-	+	catalyzes the ATP-dependent phosphorylation of dephospho-CoA,	Cytosolic
WP_103119027.1 MULTISPECIES: decarboxylating NADP(+)-dependent phosphogluconate dehydrogenase [Lysinibacillus]	-	+	Catalyzes the oxidative decarboxylation of 6-phosphogluconate to ribulose 5-phosphate and CO(2), with concomitant reduction of NADP to NADPH	Cytosolic
WP_107921590.1 MULTISPECIES: flagellin [Lysinibacillus]	-	+	enables bacterial motility	membrane
WP_107921989.1 MULTISPECIES: ArdC-like ssDNA-binding domain-containing protein [Lysinibacillus]	-	+	regulatory	Cytosolic
WP_108030684.1 MULTISPECIES: GGDEF domain-containing protein [Lysinibacillus]	-	+	Regulatory	Cytosolic
WP_115674027.1 MULTISPECIES: rhodanese-related sulfurtransferase [Lysinibacillus]	-	+	catalyzes the transfer of the sulfane atom of thiosulfate to cyanide, to form sulfite and thiocyanate	Cytosolic
WP_126657037.1 MULTISPECIES: DNA repair protein RecN [Lysinibacillus]	-	+	Regulatory	Cytosolic
WP_126657206.1 MULTISPECIES: alanine--tRNA ligase [Lysinibacillus]	-	+	Regulatory	Cytosolic
WP_126657522.1 MULTISPECIES: ribosome recycling factor [Lysinibacillus]	-	+	Regulatory	Cytosolic
WP_126657706.1 MULTISPECIES: ribosome biogenesis GTPase Der [Lysinibacillus]	-	+	Regulatory	Cytosolic
WP_126658149.1 MULTISPECIES: cysteine--tRNA ligase [Lysinibacillus]	-	+	Regulatory	Cytosolic
WP_139015310.1 MULTISPECIES: IS3 family transposase [Lysinibacillus]	-	+	identify the inverse terminal repeat sequences within the DNA	Cytosolic
WP_139015331.1 MULTISPECIES: DUF2306 domain-containing protein [Lysinibacillus]	-	+	unknown	Cytosolic
WP_139015370.1 MULTISPECIES: Ig-like domain-containing protein [Lysinibacillus]	-	+	that of cell-surface receptors for antigen which permit cell signaling and cell activation and that of soluble effector molecules which can individually bind and neutralize antigens at a distance.	Membrane
WP_139015372.1 MULTISPECIES: YitT family protein [Lysinibacillus]	-	+	unknown	spore core membrane
WP_150907890.1 MULTISPECIES: 3,4-dihydroxy-2-butanone-4-phosphate synthase [Lysinibacillus]	-	+	catalyses the conversion of D-ribulose 5-phosphate to formate and 3,4-dihydroxy-2-butanone 4-phosphate, the latter serving as the biosynthetic precursor for the xylene ring of riboflavin	cytosolic
WP_171821095.1 MULTISPECIES: NupC/NupG family nucleoside CNT transporter [Lysinibacillus]	-	+	localization	Membrane
WP_171821101.1 MULTISPECIES: alpha/beta hydrolase [Lysinibacillus]	-	+	Hydrolase activity	Cytosolic
WP_171821109.1 MULTISPECIES: ribonuclease III [Lysinibacillus]	-	+	regulatory	cytoplasm
WP_171821126.1 MULTISPECIES: cadmium-translocating P-type ATPase [Lysinibacillus]	-	+	ATPase-coupled cation transmembrane transporter activit	Membrane
WP_174804706.1 MULTISPECIES: ATP-binding cassette domain-containing protein [Lysinibacillus]	-	+	metabolism	cytoplasm
WP_175400778.1 MULTISPECIES: lysine--tRNA ligase [Lysinibacillus]	-	+	Regulatory	cytoplasm
WP_179965997.1 MULTISPECIES: penicillin-binding protein 1A [Lysinibacillus]	-	+	bind to penicillin and other antibiotics of the β-lactam class. Penicillin-binding proteins are generally enzymes involved in peptidoglycan biosynthesis	Membrane
WP_196764890.1 MULTISPECIES: phage terminase large subunit family protein [Lysinibacillus]	-	+	ATPase activity to provide energy for packaging and a nuclease activity for packaging initiation and termination	Membrane
WP_198926864.1 MULTISPECIES: lysine--tRNA ligase [Lysinibacillus]	-	+	Regulatory	cytoplasm
WP_206700864.1 MULTISPECIES: serine O-acetyltransferase [Lysinibacillus]	-	+	helps catalyse acetyl transfe	Membrane
WP_206700871.1 MULTISPECIES: magnesium/cobalt transporter CorA [Lysinibacillus]	-	+	magnesium/cobalt transport	Membrane
WP_206700899.1 MULTISPECIES: DsbA family protein [Lysinibacillus]	-	+	introducing disulfide bonds into nascent proteins	Periplasm
WP_206700917.1 MULTISPECIES: flagellar motor switch protein FliG [Lysinibacillus]	-	+	regulates the direction of flagellar rotation and hence controls swimming behaviour.	Membrane
WP_206700948.1 MULTISPECIES: tRNA (guanosine(46)-N7)-methyltransferase TrmB [Lysinibacillus]	-	+	Regulation	Cytosolic
WP_206700968.1 MULTISPECIES: 1-deoxy-D-xylulose-5-phosphate synthase [Lysinibacillus]	-	+	Catalyzes the acyloin condensation reaction between C atoms 2 and 3 of pyruvate and glyceraldehyde 3-phosphate to yield 1-deoxy-D-xylulose-5-phosphate (DXP)	Cytosolic
WP_206701009.1 MULTISPECIES: o-succinylbenzoate synthase [Lysinibacillus]	-	+	he dehydration of SHCHC to form OSB, Vit K synthesis	Cytosolic
WP_206701026.1 MULTISPECIES: FTR1 family protein [Lysinibacillus]	-	+	Membrane Transport	Membrane
WP_206701034.1 MULTISPECIES: ATP-grasp domain-containing protein [Lysinibacillus]	-	+	metabolism	Cytosolic
WP_206701054.1 MULTISPECIES: DNA repair protein RecN [Lysinibacillus]	-	+	Regulatory	Cytosolic
WP_206701066.1 MULTISPECIES: transglutaminase-like domain-containing protein [Lysinibacillus]	-	+	regulation of cell fate in a wide range of cellular systems and are implicated to have roles in development of disease	Cytosolic
WP_206701068.1 MULTISPECIES: leucine-rich repeat domain-containing protein [Lysinibacillus]	-	+	provide a versatile structural framework for the formation of protein-protein interactions	Cytosolic
WP_208704347.1 MULTISPECIES: DnaD domain protein [Lysinibacillus]	-	+	Regulatory	Cytosolic
WP_216604599.1 MULTISPECIES: RNA polymerase sigma factor SigX [Lysinibacillus]	-	+	Regulatory	Cytosolic
WP_217580507.1 MULTISPECIES: dihydrolipoyl dehydrogenase [Lysinibacillus]	-	+	production of energy	Cytosolic
WP_217580665.1 MULTISPECIES: cytochrome c biogenesis protein ResB [Lysinibacillus]	-	+	cytochrome c biogenesis	Cytosolic (mitochondria)
WP_217580955.1 MULTISPECIES: DNA topoisomerase III [Lysinibacillus]	-	+	Regulatory	Cytosolic
WP_217581112.1 MULTISPECIES: tyrosine-type recombinase/integrase [Lysinibacillus]	-	+	rearrange DNA duplexes by means of conservative site-specific recombination reactions	Cytosolic
WP_217581369.1 MULTISPECIES: phosphoglycerate mutase family protein [Lysinibacillus]	-	+	atalyzes the movement of a functional group from one position to another within the same molecule	Cytosolic
WP_217581625.1 MULTISPECIES: sensor histidine kinase [Lysinibacillus]	-	+	sensing external environmental changes	membrane
WP_217581669.1 MULTISPECIES: carbon-nitrogen family hydrolase [Lysinibacillus]	-	+	cleave various nitriles into the corresponding acids and ammonia	Cytosolic
WP_227256803.1 MULTISPECIES: sigma-70 family RNA polymerase sigma factor [Lysinibacillus]	-	+	determining the specificity of promoter DNA binding and control how efficiently RNA synthesis (transcription) is initiated	Cytosolic
WP_227256826.1 MULTISPECIES: serine/threonine protein phosphatase [Lysinibacillus]	-	+	removes a phosphate group from a protein. Together, these two families of enzymes act to modulate the activities of the proteins in a cell, often in response to external stimuli.	Cytosolic
WP_227256843.1 MULTISPECIES: GDSL-type esterase/lipase family protein [Lysinibacillus]	-	+	hydrolyze many kinds of substrates such as thioesters, aryl esters, phospholipids and amino acids	Cytosolic
WP_227256845.1 MULTISPECIES: GNAT family N-acetyltransferase [Lysinibacillus]	-	+	aminoglycoside antibiotic resistance, transcription regulation, protein acetylation and stress reaction	Cytosolic
WP_227256872.1 MULTISPECIES: sensor domain-containing diguanylate cyclase [Lysinibacillus]	-	+	the formation of the ubiquitous second messenger, cyclic-di-GMP, involved in bacterial biofilm formation and persistence	membrane
WP_227256875.1 MULTISPECIES: NtaA/DmoA family FMN-dependent monooxygenase [Lysinibacillus]	-	+	oxidoreductase activity, acting on paired donors, with incorporation or reduction of molecular oxygen	Cytosolic
WP_227256883.1 MULTISPECIES: GNAT family N-acetyltransferase [Lysinibacillus]	-	+	aminoglycoside antibiotic resistance, transcription regulation, protein acetylation and stress reaction	Cytosolic
WP_227256887.1 MULTISPECIES: tetratricopeptide repeat protein [Lysinibacillus]	-	+	encodes an intraflagellar transport component-A, IFT139,	Membrane
WP_227256892.1 MULTISPECIES: agmatinase family protein [Lysinibacillus]	-	+	hydrolyzes agmatine to produce urea and putrescine	Cytosolic
WP_227256910.1 MULTISPECIES: ATP-binding protein [Lysinibacillus]	-	+	binding site that allows ATP molecule to interact. This binding sites is a micro-environment where ATP is captured and hydrolyzed to ADP, releasing energy which is utilized by the protein	Cytosolic
WP_227256912.1 MULTISPECIES: flagellar biosynthetic protein FliO [Lysinibacillus]	-	+	flagella biosynthethesis	Membrane
WP_227256932.1 MULTISPECIES: HAMP domain-containing histidine kinase [Lysinibacillus]	-	+	sensing external environmental changes	Membrane
WP_227256948.1 MULTISPECIES: sensor histidine kinase [Lysinibacillus]	-	+	sensing external environmental changes	Membrane
WP_229388753.1 MULTISPECIES: ribosome biogenesis GTPase YlqF [Lysinibacillus]	-	+	biogenesis of the 50S ribosomal	Cytosolic
WP_229388779.1 MULTISPECIES: riboflavin biosynthesis protein RibF [Lysinibacillus]	-	+	riboflavin biosynthesis	Cytosolic
WP_229389906.1 MULTISPECIES: trypsin-like peptidase domain-containing protein [Lysinibacillus]	-	+	cleave peptide bonds in proteins	Cytosolic
WP_230591252.1 MULTISPECIES: YdcF family protein [Lysinibacillus]	-	+	unknown	Membrane
WP_231595554.1 MULTISPECIES: FadR family transcriptional regulator [Lysinibacillus]	-	+	Transcription Regulation	Cytosolic
WP_231595662.1 MULTISPECIES: GGDEF domain-containing protein [Lysinibacillus]	-	+	phosphorylation receiver or oxygen sensing	Membrane
WP_231595752.1 MULTISPECIES: methyl-accepting chemotaxis protein [Lysinibacillus]	-	+	process environmental and intracellular sensory (input) signals and alter the activity of the CheA histidine kinase	Membrane
WP_232900796.1 MULTISPECIES: methyl-accepting chemotaxis protein [Lysinibacillus]	-	+	process environmental and intracellular sensory (input) signals and alter the activity of the CheA histidine kinase	Membrane
WP_232900890.1 MULTISPECIES: diguanylate cyclase [Lysinibacillus]	-	+	the formation of the ubiquitous second messenger, cyclic-di-GMP	membrane
WP_239069388.1 MULTISPECIES: GGDEF domain-containing protein [Lysinibacillus]	-	+	phosphorylation receiver or oxygen sensing	membrane
WP_241744847.1 MULTISPECIES: Ger(x)C family spore germination C-terminal domain-containing protein, partial [Lysinibacillus]	-	+	germination of Bacillus spores	Cytosolic (Cytoplasm)
WP_241744848.1 MULTISPECIES: helix-turn-helix domain-containing protein [Lysinibacillus]	-	+	DNA Regulation	Cytosolic (Nucleus)
WP_241744852.1 MULTISPECIES: 3-hydroxyacyl-CoA dehydrogenase/enoyl-CoA hydratase family protein [Lysinibacillus]	+	+	catalyzes the second step in the physiologically important beta-oxidation pathway of fatty acid metabolism	Cytosolic (mitochondria)

## Sheet: Unique Peptide
Protein	Present in Control Broth	Present in Test Broth	Protein Funtion	Protein Location Cytosoic/membrane
WP_008181913.1 MULTISPECIES: 50S ribosomal protein L2 [Lysinibacillus]	+	+	Required for association of the 30S and 50S subunits to form the 70S ribosome, for tRNA binding and peptide bond formation	cytosolic
WP_012291949.1 MULTISPECIES: DUF4132 domain-containing protein [Lysinibacillus]	+	+	unknown	cytosolic
WP_012291986.1 MULTISPECIES: phosphate ABC transporter ATP-binding protein [Lysinibacillus]	+	+	phosphate import.active transport of solutes across the cytoplasmic membrane	membrane protein
WP_012292176.1 MULTISPECIES: DNA repair exonuclease [Lysinibacillus]	+	+	DNA Repair, Mismatch repair	cytosolic
WP_012292187.1 MULTISPECIES: HIT family protein [Lysinibacillus]	+	+	catalytic activity, nucleotide metaboloic process	cytosolic
WP_012292740.1 MULTISPECIES: class II fructose-bisphosphatase [Lysinibacillus]	+	+	glycolysis/gluconeogenesis	cytosolic
WP_012293172.1 MULTISPECIES: RNA-binding protein [Lysinibacillus]	+	+	Post transcriptional regulation, transciption terminationvia attenuation or antitermination mechanisms	cytosolic
WP_012294163.1 MULTISPECIES: oleate hydratase [Lysinibacillus]	+	+	catalyses the addition of water to the CC double bond of oleic acid to produce (R)-10-hydroxystearic acid	cytosolic
WP_012295274.1 MULTISPECIES: DNA (cytosine-5-)-methyltransferase [Lysinibacillus]	+	+	Methylates CpG residues	cytosolic
WP_012295396.1 MULTISPECIES: magnesium/cobalt transporter CorA [Lysinibacillus]	+	+	Mediates influx of magnesium ions	membrane protein
WP_012295584.1 MULTISPECIES: FAD-binding oxidoreductase [Lysinibacillus]	+	+	Helps in regulation of metabolic pathways, oxidation and reduction	cytosolic
WP_012295643.1 MULTISPECIES: tRNA 4-thiouridine(8) synthase ThiI [Lysinibacillus]	+	+	plays a role in protecting cells from near-UV killing	cytosolic
WP_012295698.1 MULTISPECIES: DUF4479 domain-containing tRNA-binding protein [Lysinibacillus]	+	+	unknown	cytosolic
WP_012295754.1 MULTISPECIES: amidohydrolase [Lysinibacillus]	+	+	unknown	cytosolic
WP_012296051.1 MULTISPECIES: 50S ribosomal protein L17 [Lysinibacillus]	+	+	Translation and structural constituent of ribosome	cytosolic
WP_025115837.1 MULTISPECIES: DUF402 domain-containing protein [Lysinibacillus]	+	+	unknown	cytosolic
WP_031415833.1 MULTISPECIES: 30S ribosomal protein S6 [Lysinibacillus]	+	+	r RNA binding and structural constituent of ribosome	cytosolic
WP_031415837.1 MULTISPECIES: mechanosensitive ion channel family protein [Lysinibacillus]	+	+	opens in response to stretch forces in the membrane lipid bilayer	cytosolic
WP_008181711.1 MULTISPECIES: 30S ribosomal protein S5 [Lysinibacillus]	+	+	r RNA binding and structural constituent of ribosome	cytosolic
WP_010860053.1 MULTISPECIES: 50S ribosomal protein L21 [Lysinibacillus]	+	+	Required for association of the 30S and 50S subunits to form the 70S ribosome, for tRNA binding and peptide bond formation	cytosolic
WP_010860160.1 MULTISPECIES: 50S ribosomal protein L20 [Lysinibacillus]	+	+	Required for association of the 30S and 50S subunits to form the 70S ribosome, for tRNA binding and peptide bond formation	cytosolic
WP_012291833.1 MULTISPECIES: DNA gyrase subunit A [Lysinibacillus]	+	+	DNA topoisomerase type II (double strand cut, ATP-hydrolyzing) activity	cytosolic
WP_012291837.1 MULTISPECIES: IMP dehydrogenase [Lysinibacillus]	+	+	IMP dehydrogenase catalyzes the oxidation of IMP to XMP with the concomitant reduction of NAD+ to NADH	cytosolic
WP_012291863.1 MULTISPECIES: DNA polymerase III subunit delta' [Lysinibacillus]	+	+	DNA Dependent DNA Replication	cytosolic
WP_012291901.1 MULTISPECIES: cysteine synthase A [Lysinibacillus]	+	+	Biosynthesis of cysteine	cytosolic
WP_012291937.1 MULTISPECIES: twin-arginine translocase subunit TatC [Lysinibacillus]	+	+	the export of folded proteins across the cytoplasmic membrane of bacteria.	cytosolic
WP_012291979.1 MULTISPECIES: methionine synthase [Lysinibacillus]	+	+	amino acid and methyl group metabolism	cytosolic
WP_012292010.1 MULTISPECIES: adenylosuccinate lyase [Lysinibacillus]	+	+	cellular replication and metabolism	cytosolic
WP_012292031.1 MULTISPECIES: cytochrome ubiquinol oxidase subunit I [Lysinibacillus]	+	+	Electron transport chain	cell membrane
WP_012292076.1 MULTISPECIES: SMC family ATPase [Lysinibacillus]	+	+	chromosome condensation and sister chromatid cohesion.	Cytosolic protein
WP_012292178.1 MULTISPECIES: 3'-5' exoribonuclease YhaM [Lysinibacillus]	+	+	RNA Metabolism, processing, degradation	cytosolic
WP_012292276.1 MULTISPECIES: DNA cytosine methyltransferase [Lysinibacillus]	+	+	modify cytosins on both strand , full methylated strand or hemi methylated strand.	cytosolic
WP_012292330.1 MULTISPECIES: Fe-S cluster assembly protein SufD [Lysinibacillus]	+	+	contributes to the assembly or repair of oxygen-labile iron-sulfur clusters under oxidative stress.	cytosolic
WP_012292397.1 MULTISPECIES: ornithine--oxo-acid transaminase [Lysinibacillus]	+	+	Catalyzes the interconversion of ornithine to glutamate semialdehyde.	cytosolic
WP_012292409.1 MULTISPECIES: DUF5808 domain-containing protein [Lysinibacillus]	+	+	unknown	cytosolic
WP_012292429.1 MULTISPECIES: GNAT family N-acetyltransferase [Lysinibacillus]	+	+	catalyse the transfer of an acetyl group from acetyl CoA to the primary amine of substrates including antibiotics aminoglycosides, glucosamine-6-phosphate, histones, serotonin	cytosolic
WP_012292448.1 MULTISPECIES: GMC family oxidoreductase [Lysinibacillus]	+	+	Flavin adenin dinucleotide binding, oxidoreductase activity, acting on CH-OH groups of donor	cytosolic
WP_012292525.1 MULTISPECIES: HAMP domain-containing histidine kinase [Lysinibacillus]	+	+	signal transduction not only in histidine kinase but also in a number of other signal-transducing receptor proteins.	Internal membran protein
WP_012292547.1 MULTISPECIES: GNAT family N-acetyltransferase [Lysinibacillus]	+	+	aminoglycoside antibiotic resistance, transcription regulation, protein acetylation and stress reaction	cytosolic
WP_012292554.1 MULTISPECIES: choice-of-anchor I family protein [Lysinibacillus]	+	+	Calcium ion binding	Membrane
WP_012292718.1 MULTISPECIES: long-chain-fatty-acid--CoA ligase [Lysinibacillus]	+	+	catalyzes the formation of fatty acyl-CoA	cytosolic
WP_012292862.1 MULTISPECIES: Fic family protein [Lysinibacillus]	+	+	involved in the modification of protein substrates by the addition of phosphate-containing compounds	cytosolic
WP_012292914.1 MULTISPECIES: flagellar export chaperone FliS [Lysinibacillus]	+	+	required for the secretion of flagellin monomers	cytosolic
WP_012292936.1 MULTISPECIES: TVP38/TMEM64 family protein [Lysinibacillus]	+	+	Transmembrane protein, membrane organization	membrane protein
WP_012292938.1 MULTISPECIES: helicase-exonuclease AddAB subunit AddA [Lysinibacillus]	+	+	DNA Repair, Mismatch repair	cytosolic
WP_012292989.1 MULTISPECIES: class II fructose-bisphosphate aldolase [Lysinibacillus]	+	+	Catalyzes the aldol condensation of dihydroxyacetone phosphate (DHAP or glycerone-phosphate) Gluconeogenesis	cytosolic
WP_012293016.1 MULTISPECIES: efflux RND transporter permease subunit [Lysinibacillus]	+	+	efflux transmembrane transporter activity	cytosolic
WP_012293093.1 MULTISPECIES: pyruvate dehydrogenase (acetyl-transferring) E1 component subunit alpha [Lysinibacillus]	+	+	catalyzes the overall conversion of pyruvate to acetyl-CoA and CO2	Mitochondrial matrix
WP_012293095.1 MULTISPECIES: 2-oxo acid dehydrogenase subunit E2 [Lysinibacillus]	+	+	catalyze the oxidation of 2-oxoacids to yield the corresponding acyl-CoAs and NADH.	Mitochondria
WP_012293096.1 MULTISPECIES: dihydrolipoyl dehydrogenase [Lysinibacillus]	+	+	Part of the pyruvate dehydrogenase (PDH),	Mitochondria
WP_012293136.1 MULTISPECIES: glycerophosphodiester phosphodiesterase [Lysinibacillus]	+	+	production of metabolic carbon and phosphate sources from glycerophosphodiesters	cytosolic
WP_012293201.1 MULTISPECIES: peptide ABC transporter substrate-binding protein [Lysinibacillus]	+	+	substrate specificity and high affinity of ABC uptake systems	membrane
WP_012293213.1 MULTISPECIES: ribosome small subunit-dependent GTPase A [Lysinibacillus]	+	+	promotes dissociation of tRNA from the ribosome.	cytoplasm
WP_012293254.1 MULTISPECIES: FADH(2)-oxidizing methylenetetrahydrofolate--tRNA-(uracil(54)-C(5))-methyltransferase TrmFO [Lysinibacillus]	+	+	t RNA Methylation	cytosolic
WP_012293257.1 MULTISPECIES: GTP-sensing pleiotropic transcriptional regulator CodY [Lysinibacillus]	+	+	transcription regulator	cytosolic
WP_012293292.1 MULTISPECIES: translation elongation factor Ts [Lysinibacillus]	+	+	catalyzing the binding of an aminoacyl-tRNA (aa-tRNA) to the ribosome.	cytosolic
WP_012293302.1 MULTISPECIES: transcription termination factor NusA [Lysinibacillus]	+	+	influences transcription by inducing pausing and facilitating the process of transcription termination/antitermination.	cytosolic
WP_012293316.1 MULTISPECIES: aspartate-semialdehyde dehydrogenase [Lysinibacillus]	+	+	biosynthesis of amino acids	cytosolic
WP_012293320.1 MULTISPECIES: BMP family protein [Lysinibacillus]	+	+	specific receptors on the cell surface,	cytosolic
WP_012293385.1 MULTISPECIES: recombinase family protein [Lysinibacillus]	+	+	DNA Repair, damage repair	cytosolic
WP_012293450.1 MULTISPECIES: LysR family transcriptional regulator [Lysinibacillus]	+	+	Transcription Regulation	cytosolic
WP_012293531.1 MULTISPECIES: chitobiase/beta-hexosaminidase C-terminal domain-containing protein [Lysinibacillus]	+	+	unknown	cytosolic
WP_012293535.1 MULTISPECIES: class 1b ribonucleoside-diphosphate reductase subunit alpha [Lysinibacillus]	+	+	Catalyzes the biosynthesis of deoxyribonucleotides from the corresponding ribonucleotides.	cytosolic
WP_012293630.1 MULTISPECIES: terminase family protein [Lysinibacillus]	+	+	key component of the DNA packaging machine	cytosolic
WP_012293679.1 MULTISPECIES: CoA-acylating methylmalonate-semialdehyde dehydrogenase [Lysinibacillus]	+	+	valine and pyrimidine metabolism	cytosolic
WP_012293689.1 MULTISPECIES: spore germination protein [Lysinibacillus]	+	+	leads to a resumption of metabolism in spore outgrowth.	cytosolic
WP_012293906.1 MULTISPECIES: mannonate oxidoreductase [Lysinibacillus]	+	+	Involved in the pathway pentose and glucuronate interconversion, Carbohydrate metabolism.	cytosolic
WP_012293945.1 MULTISPECIES: ABC transporter ATP-binding protein [Lysinibacillus]	+	+	Active Transport of solutes	Membrane
WP_012293962.1 MULTISPECIES: PepSY domain-containing protein [Lysinibacillus]	+	+	range of functions from nutrient production to pathogenicity.	cytosolic
WP_012293968.1 MULTISPECIES: DUF418 domain-containing protein [Lysinibacillus]	+	+	Integral membrane protein	Internal membrane
WP_012294001.1 MULTISPECIES: sporulation protein [Lysinibacillus]	+	+	allows a starving cell to survive	integral membrane
WP_012294079.1 MULTISPECIES: aspartate kinase [Lysinibacillus]	+	+	catalyzes the phosphorylation of the amino acid aspartate	cytosolic
WP_012294156.1 MULTISPECIES: SDR family oxidoreductase [Lysinibacillus]	+	+	catalyzing the redox of the hydroxyl/ketone group of the hormone.	cytosolic
WP_012294172.1 MULTISPECIES: collagenase [Lysinibacillus]	+	+	assist in destroying extracellular structures in the pathogenesis of bacteria	membrane
WP_012295212.1 MULTISPECIES: transcriptional repressor [Lysinibacillus]	+	+	bind to specific sites on DNA and prevent transcription of nearby genes.	Cytoplasm
WP_012295261.1 MULTISPECIES: TrkA family potassium uptake protein [Lysinibacillus]	+	+	May regulate the transport activity of TrkG and TrkH systems.	membrane
WP_012295301.1 MULTISPECIES: tyrosine-type recombinase/integrase [Lysinibacillus]	+	+	rearrange DNA duplexes by means of conservative site-specific recombination reactions.	cytosolic
WP_012295327.1 MULTISPECIES: molecular chaperone DnaK [Lysinibacillus]	+	+	heat-shock proteins, refold misfolded proteins	cytosolic
WP_012295418.1 MULTISPECIES: aspartate--tRNA ligase [Lysinibacillus]	+	+	Protein biosynthesis ,ATP Binding	cytosolic
WP_012295436.1 MULTISPECIES: indole-3-glycerol phosphate synthase TrpC [Lysinibacillus]	+	+	L-tryptophan biosynthesis and in Amino-acid biosynthesis.	cytosolic
WP_012295462.1 MULTISPECIES: 50S ribosomal protein L21 [Lysinibacillus]	+	+	Required for association of the 30S and 50S subunits to form the 70S ribosome, for tRNA binding and peptide bond formation	cytosolic
WP_012295469.1 MULTISPECIES: rod shape-determining protein [Lysinibacillus]	+	+	cell shape determination of bacteria	membrane
WP_012295476.1 MULTISPECIES: valine--tRNA ligase [Lysinibacillus]	+	+	Catalyzes the attachment of valine to tRNA(Val).	Cytosol
WP_012295481.1 MULTISPECIES: uroporphyrinogen-III synthase [Lysinibacillus]	+	+	involved in the production of a molecule called heme.	cytosolic
WP_012295491.1 MULTISPECIES: trigger factor [Lysinibacillus]	+	+	ATP-independent chaperone protein that assists in folding and prevents misfolding	Cytosol
WP_012295540.1 MULTISPECIES: DUF421 domain-containing protein [Lysinibacillus]	+	+	Multi- pass membrane protein	membrane
WP_012295569.1 MULTISPECIES: electron transfer flavoprotein subunit beta/FixA family protein [Lysinibacillus]	+	+	electron transport activity	cytosolic
WP_012295696.1 MULTISPECIES: UDP-N-acetylmuramate--L-alanine ligase [Lysinibacillus]	+	+	cytoplasmic peptidoglycan biosynthetic enzyme	cytosolic
WP_012295794.1 MULTISPECIES: DEAD/DEAH box helicase [Lysinibacillus]	+	+	involved in all facets of RNA metabolism, including pre-mRNA splicing, micro RNA processing, RNA export, RNA editing, storage and decay	cytosolic
WP_012295943.1 MULTISPECIES: PLP-dependent aminotransferase family protein [Lysinibacillus]	+	+	metabolic pathways like amino acid biosynthesis and degradation	cytosolic
WP_012295993.1 MULTISPECIES: ABC-F type ribosomal protection protein [Lysinibacillus]	+	+	ribosomal protection mechanism by interacting with the ribosome	cytosolic
WP_012296105.1 MULTISPECIES: DUF4003 family protein [Lysinibacillus]	+	+	unknown	cytosolic
WP_012296206.1 MULTISPECIES: adenylosuccinate synthase [Lysinibacillus]	+	+	catalyzes the first committed step in the de novo biosynthesis of AMP	cytosolic
WP_012296215.1 MULTISPECIES: redox-regulated ATPase YchF [Lysinibacillus]	+	+	GTP Binding	cytosolic
WP_012296222.1 MULTISPECIES: tRNA uridine-5-carboxymethylaminomethyl(34) synthesis enzyme MnmG [Lysinibacillus]	+	+	NAD-binding protein involved in the addition of a carboxymethylaminomethyl	cytosolic
WP_025113851.1 MULTISPECIES: RNA polymerase sporulation sigma factor SigE [Lysinibacillus]	+	+	promote the attachment of RNA polymerase to specific initiation sites	cytosolic
WP_025113922.1 MULTISPECIES: ADP-forming succinate--CoA ligase subunit beta [Lysinibacillus]	+	+	unknown	cytosolic
WP_025116775.1 MULTISPECIES: cell division ATP-binding protein FtsE [Lysinibacillus]	+	+	involved in cellular division	cytosolic
WP_031415820.1 MULTISPECIES: response regulator YycF [Lysinibacillus]	+	+	Inhibits Expression of the Fatty Acid Biosynthesis Repressor FabT	cytosolic
WP_031416030.1 MULTISPECIES: DNA topoisomerase IV subunit B [Lysinibacillus]	+	+	essential for chromosome segregation; it is the principal protein responsible for decatenating newly replicated chromosomes	Cytosol
WP_031416178.1 MULTISPECIES: formate dehydrogenase accessory sulfurtransferase FdhD [Lysinibacillus]	+	+	sulfurtransferase activity	Cytosol
WP_031416518.1 MULTISPECIES: MurR/RpiR family transcriptional regulator [Lysinibacillus]	+	+	carbohydrate derivative metabolic process	cytosolic
WP_031416550.1 MULTISPECIES: GTPase HflX [Lysinibacillus]	+	+	RNA helicase,a ribosome splitting factor	Cytosol
WP_031416685.1 MULTISPECIES: RNA polymerase sigma factor [Lysinibacillus]	+	+	determining the specificity of promoter DNA binding	Cytosol
WP_031416724.1 MULTISPECIES: DNA-directed RNA polymerase subunit beta' [Lysinibacillus]	+	+	catalyzes the transcription of DNA into RNA	cytosolic
WP_031416837.1 MULTISPECIES: SPASM domain-containing protein [Lysinibacillus]	+	+	modify a protein to become an active enzyme, or a peptide to become a ribosomal natural product	cytosol
WP_031417388.1 MULTISPECIES: lipoate--protein ligase family protein [Lysinibacillus]	+	+	metabolism of lipoic acid	cytosol
WP_031418674.1 MULTISPECIES: TetR/AcrR family transcriptional regulator [Lysinibacillus]	+	+	DNA binding factors that regulate gene expression	Cytosolic
WP_031418679.1 MULTISPECIES: accessory Sec system translocase SecA2 [Lysinibacillus]	+	+	post-translational modifications with transport	Cytosolic
WP_031418882.1 MULTISPECIES: nitronate monooxygenase family protein [Lysinibacillus]	+	+	oxidizes the neurotoxin propionate 3-nitronate (P3N) and represents the best-known system for P3N detoxification	cytosolic
WP_031419468.1 MULTISPECIES: recombination mediator RecR [Lysinibacillus]	+	+	genome stability	Cytosolic
WP_031419663.1 MULTISPECIES: pentapeptide repeat-containing protein [Lysinibacillus]	+	+	a family of sequence motifs found in multiple tandem copies in protein molecules	Cytosolic
WP_031419855.1 MULTISPECIES: dipeptide/oligopeptide/nickel ABC transporter ATP-binding protein [Lysinibacillus]	+	+	Peptide transport	Cytosolic
WP_036075052.1 MULTISPECIES: phage baseplate assembly protein V [Lysinibacillus]	+	+	unknown	Cytosolic
WP_036160485.1 MULTISPECIES: AAA family ATPase [Lysinibacillus]	+	+	act as motors to remodel other proteins, DNA/RNA	Cytosolic
WP_036160791.1 MULTISPECIES: tyrosine-type recombinase/integrase [Lysinibacillus]	+	+	site-specific recombination	Cytosolic
WP_036160877.1 MULTISPECIES: Ppx/GppA family phosphatase [Lysinibacillus]	+	+	guanosine pentaphosphate phospho-hydrolase	Cytosolic
WP_036161309.1 MULTISPECIES: ABC transporter permease/substrate-binding protein [Lysinibacillus]	+	+	Transportation	membrane
WP_036161677.1 MULTISPECIES: IS607 family transposase [Lysinibacillus]	+	+	DNA recombination	Cytosolic
WP_036161745.1 MULTISPECIES: ABC transporter permease [Lysinibacillus]	+	+	Transportation	membrane
WP_036161791.1 MULTISPECIES: MFS transporter [Lysinibacillus]	+	+	Transportation	membrane
WP_036161951.1 MULTISPECIES: DUF6138 family protein [Lysinibacillus]	+	+	unknown	cytosolic
WP_036161987.1 MULTISPECIES: AMP-binding protein [Lysinibacillus]	+	+	unknown	cytosolic
WP_036161990.1 MULTISPECIES: non-ribosomal peptide synthetase [Lysinibacillus]	+	+	catalyze the synthesis of highly diverse natural products	cytosolic
WP_036162031.1 MULTISPECIES: biosynthetic-type acetolactate synthase large subunit [Lysinibacillus]	+	+	Amino-acid biosynthesis.	cytosolic
WP_036162215.1 MULTISPECIES: U32 family peptidase [Lysinibacillus]	+	+	organic substrate metabolic process	cytosolic
WP_036162238.1 MULTISPECIES: Holliday junction branch migration DNA helicase RuvB [Lysinibacillus]	+	+	genetic recombination	cytosolic
WP_036162346.1 MULTISPECIES: AroM family protein [Lysinibacillus]	+	+	codes for shikimate kinase II.	cytosolic
WP_036162380.1 MULTISPECIES: low molecular weight phosphotyrosine protein phosphatase [Lysinibacillus]	+	+	involved in signal transduction.	cytosolic
WP_036162515.1 MULTISPECIES: 23S rRNA (uracil(1939)-C(5))-methyltransferase RlmD [Lysinibacillus]	+	+	rRNA Processing	cytosolic
WP_036162546.1 MULTISPECIES: response regulator transcription factor [Lysinibacillus]	+	+	mediates a cell's response to changes in its environment	cytosolic
WP_036162603.1 MULTISPECIES: PolC-type DNA polymerase III [Lysinibacillus]	+	+	Required for replicative DNA synthesis	cytosolic
WP_036162758.1 MULTISPECIES: bile acid:sodium symporter [Lysinibacillus]	+	+	neurotransmitter transporter	membrane
WP_036162792.1 MULTISPECIES: non-ribosomal peptide synthetase [Lysinibacillus]	+	+	catalyze the synthesis of highly diverse natural products	cytosolic
WP_036162823.1 MULTISPECIES: polysaccharide biosynthesis protein [Lysinibacillus]	+	+	exopolysaccharide biosynthesis	cytosolic
WP_036220092.1 MULTISPECIES: assimilatory sulfite reductase (NADPH) flavoprotein subunit [Lysinibacillus]	+	+	unknown	cytosolic
WP_036225052.1 MULTISPECIES: 2,3-butanediol dehydrogenase [Lysinibacillus]	+	+	unknown	cytosolic
WP_036225924.1 MULTISPECIES: preprotein translocase subunit SecA [Lysinibacillus]	+	+	membrane transporter for secretory proteins	cytosolic
WP_048391396.1 MULTISPECIES: tRNA (adenosine(37)-N6)-dimethylallyltransferase MiaA [Lysinibacillus]	+	+	Catalyzes the transfer of a dimethylallyl group onto the adenine	cytosolic
WP_048393118.1 MULTISPECIES: sigma-70 family RNA polymerase sigma factor [Lysinibacillus]	+	+	components of the RNA polymerase holoenzyme	cytosolic
WP_051147711.1 MULTISPECIES: MarR family transcriptional regulator [Lysinibacillus]	+	+	gene expression regulation	cytosolic
WP_051563217.1 MULTISPECIES: TetR/AcrR family transcriptional regulator [Lysinibacillus]	+	+	Transcription regulation	cytosolic
WP_051563248.1 MULTISPECIES: DUF3885 domain-containing protein [Lysinibacillus]	+	+		cytosolic
WP_052323565.1 MULTISPECIES: stalk domain-containing protein [Lysinibacillus]	+	+	Membrane remodling	cytosolic
WP_053595319.1 MULTISPECIES: riboflavin synthase [Lysinibacillus]	+	+	riboflavin biosynthesis	cytosolic
WP_053596370.1 MULTISPECIES: FkbM family methyltransferase [Lysinibacillus]	+	+	Methyltransferase activity	cytosolic
WP_058844806.1 MULTISPECIES: alanine dehydrogenase [Lysinibacillus]	+	+	catalyses the reversible oxidative deamination of l-alanine to pyruvate	cytosolic
WP_068983117.1 MULTISPECIES: translation initiation factor IF-2 [Lysinibacillus]	+	+	Initiation of translation	cytosolic
WP_068983165.1 MULTISPECIES: type I DNA topoisomerase [Lysinibacillus]	+	+	to remove DNA supercoils during transcription and DNA replication	cytosolic
WP_068983729.1 MULTISPECIES: histidine--tRNA ligase [Lysinibacillus]	+	+	Protein biosynthesis	cytosolic
WP_068983781.1 MULTISPECIES: glutamate-1-semialdehyde 2,1-aminomutase [Lysinibacillus]	+	+	the isomerization of glutamate-1-semialdehyde (GSA) to 5-aminolevulinate (ALA)	cytosolic
WP_068985713.1 MULTISPECIES: protein arginine kinase [Lysinibacillus]	+	+	cellular energy metabolism	cytosolic
WP_068986766.1 MULTISPECIES: chaperonin GroEL [Lysinibacillus]	+	+	a protein folding cage	cytosolic
WP_075807269.1 3,4-dihydroxy-2-butanone-4-phosphate synthase [Lysinibacillus agricola]	+	+	catalyses the conversion of D-ribulose 5-phosphate to formate and 3,4-dihydroxy-2-butanone 4-phosphate	cytosolic
WP_075807287.1 MULTISPECIES: zinc-ribbon domain-containing protein [Lysinibacillus]	+	+	plays a structural role contributing to the stability of the domain	cytosolic
WP_080709099.1 MULTISPECIES: sigma-70 family RNA polymerase sigma factor [Lysinibacillus]	+	+	RNA polymerase holoenzyme	cytosolic
WP_083227131.1 MULTISPECIES: tRNA (adenosine(37)-N6)-threonylcarbamoyltransferase complex ATPase subunit type 1 TsaE [Lysinibacillus]	+	+	Transferase activity	cytosolic
WP_089985339.1 MULTISPECIES: ribosome recycling factor [Lysinibacillus]	+	+	recycle ribosomes after completion of protein synthesis	cytosolic
WP_099805090.1 MULTISPECIES: malonate decarboxylase subunit epsilon [Lysinibacillus]	+	+	malonyl-CoA:ACP transacylase,	cytosolic
WP_103117223.1 MULTISPECIES: serine--tRNA ligase [Lysinibacillus]	+	+	catalyses the attachment of serine to tRNA (Ser)	cytosolic
WP_107922044.1 MULTISPECIES: glutamyl-tRNA reductase [Lysinibacillus]	+	+	catalyzes the first step of tetrapyrrole biosynthesis	cytosolic
WP_107922374.1 MULTISPECIES: leucine--tRNA ligase [Lysinibacillus]	+	+	translation of the genetic code by catalyzing the attachment of an amino acid to its corresponding tRNA.	cytosolic
WP_115673784.1 MULTISPECIES: carbamoyl-phosphate synthase large subunit [Lysinibacillus]	+	+	catalyzes the ATP-dependent synthesis of carbamoyl phosphate	cytosolic
WP_126657807.1 MULTISPECIES: precorrin-6A reductase [Lysinibacillus]	+	+	synthesizes cob(II)yrinate a,c-diamide from precorrin-2	cytosolic
WP_126659346.1 MULTISPECIES: chaperonin GroEL [Lysinibacillus]	+	+	Protein folding	cytosolic
WP_126660401.1 MULTISPECIES: YbaB/EbfC family nucleoid-associated protein [Lysinibacillus]	+	+	binding and altering DNA conformation	cytosolic
WP_155591959.1 MULTISPECIES: flagellin Hag [Lysinibacillus]	+	+	to form filaments	Membrane
WP_155593039.1 MULTISPECIES: 30S ribosomal protein S7 [Lysinibacillus]	+	+	rRNA binding proteins	cytosolic
WP_171821110.1 MULTISPECIES: DNA translocase FtsK [Lysinibacillus]	+	+	hydrolysing ATP into movement of a DNA substrate	cytosolic
WP_197148452.1 MULTISPECIES: isoleucine--tRNA ligase [Lysinibacillus]	+	+	Catalyzes the specific attachment of an amino acid to its cognate tRNA	cytosolic
WP_205447410.1 MULTISPECIES: aminotransferase class III-fold pyridoxal phosphate-dependent enzyme [Lysinibacillus]	+	+	Pyridoxcel phosphate binding	cytosolic
WP_206700908.1 MULTISPECIES: RloB domain-containing protein [Lysinibacillus]	+	+	influence the formation of the nucleoprotein structure,	cytosolic
WP_206700980.1 MULTISPECIES: DUF3006 family protein [Lysinibacillus]	+	+	unknown	cytosolic
WP_206701033.1 MULTISPECIES: PucR family transcriptional regulator [Lysinibacillus]	+	+	responsible for the regulation of expression of the genes of the purine catabolic pathway	cytosolic
WP_206701041.1 MULTISPECIES: TrkH family potassium uptake protein [Lysinibacillus]	+	+	potassium uptake protein	cytosolic
WP_206701061.1 MULTISPECIES: DNA polymerase III subunit gamma/tau [Lysinibacillus]	+	+	DNA Replication	cytosolic
WP_206701069.1 MULTISPECIES: methyl-accepting chemotaxis protein [Lysinibacillus]	+	+	undergo reversible methylation during adaptation	Integral membrane protein
WP_206701070.1 MULTISPECIES: imidazolonepropionase [Lysinibacillus]	+	+	Histidin degradation	cytosolic
WP_206701081.1 MULTISPECIES: RNA polymerase sigma factor [Lysinibacillus]	+	+	Transcription	cytosolic
WP_217580989.1 MULTISPECIES: SDR family oxidoreductase [Lysinibacillus]	+	+	catalyzing the redox of the hydroxyl/ketone group of the hormone.	cytosolic
WP_217581244.1 MULTISPECIES: GNAT family N-acetyltransferase [Lysinibacillus]	+	+	aminoglycoside antibiotic resistance, transcription regulation, protein acetylation and stress reaction
WP_217581450.1 MULTISPECIES: SagB/ThcOx family dehydrogenase [Lysinibacillus]	+	+	unknown
WP_217581672.1 MULTISPECIES: CoA-acylating methylmalonate-semialdehyde dehydrogenase [Lysinibacillus]	+	+	Irreversible oxidative phosphorylation	cytosolic
WP_225316267.1 MULTISPECIES: isoprenyl transferase [Lysinibacillus]	+	+	Catalyzes the condensation of isopentenyl diphosphate (IPP)	cytosolic
WP_227256907.1 MULTISPECIES: NEAT domain-containing protein [Lysinibacillus]	+	+	important for bacterial growth	cytosolic
WP_232735586.1 MULTISPECIES: peptide ABC transporter substrate-binding protein [Lysinibacillus]	+	+	peptide transport	cytosolic
WP_232901020.1 MULTISPECIES: cell wall-binding protein [Lysinibacillus]	+	+	modifying cell wall components	membrane
WP_232901024.1 MULTISPECIES: ABC transporter ATP-binding protein/permease [Lysinibacillus]	+	+	uses the hydrolysis of ATP to energise diverse biological systems	cytosolic
WP_008180932.1 MULTISPECIES: RNA polymerase sporulation sigma factor SigK [Lysinibacillus]	+	+	Transcription	cytosolic
WP_012291831.1 MULTISPECIES: DNA replication/repair protein RecF [Lysinibacillus]	+	+	Error and mismatch repair	cytosolic
WP_012291840.1 MULTISPECIES: PLP-dependent aminotransferase family protein [Lysinibacillus]	+	+	involved in metabolic pathways like amino acid biosynthesis and degradation	cytosolic
WP_012295255.1 MULTISPECIES: sporulation protein YqfD [Lysinibacillus]	+	+	sporulation process	cytosolic
WP_012295447.1 MULTISPECIES: preprotein translocase subunit YajC [Lysinibacillus]	+	+	Transport	membrane
WP_012295678.1 MULTISPECIES: iron-containing alcohol dehydrogenase [Lysinibacillus]	+	+	involved in alcohol metabolism	cytosolic
WP_012295792.1 MULTISPECIES: PH domain-containing protein [Lysinibacillus]	+	+	regulating diverse signaling pathways and functions	cytosolic
WP_012295849.1 MULTISPECIES: SAM-dependent methyltransferase [Lysinibacillus]	+	+	to methylate proteins, small molecules	cytosolic
WP_012296093.1 MULTISPECIES: DNA repair protein RadA [Lysinibacillus]	+	+	Error and mismatch repair during replication	cytosolic
WP_012296135.1 MULTISPECIES: VOC family protein [Lysinibacillus]	+	+	Biological reactions	cytosolic
WP_012296155.1 MULTISPECIES: malate:quinone oxidoreductase [Lysinibacillus]	+	+	synthesizes oxaloacetate from (S)-malate (quinone rout	cytosolic
WP_031416357.1 MULTISPECIES: bifunctional homocysteine S-methyltransferase/methylenetetrahydrofolate reductase [Lysinibacillus]	+	+	folate and homocysteine metabolism	cytosolic
WP_031416573.1 MULTISPECIES: C40 family peptidase [Lysinibacillus]	+	+	responsible for the degradation of bacterial cell wall components	cytosolic
WP_031416725.1 MULTISPECIES: DNA-directed RNA polymerase subunit beta [Lysinibacillus]	+	+	Transcription	cytosolic
WP_031417987.1 MULTISPECIES: ubiquinol-cytochrome c reductase iron-sulfur subunit [Lysinibacillus]	+	+	generates an electrochemical potential coupled to ATP synthesis.	cytosolic
WP_031418516.1 MULTISPECIES: 3-hydroxyacyl-ACP dehydratase FabZ [Lysinibacillus]	+	+	Catalyzes the dehydration of short chain beta-hydroxyacyl-ACPs and long chain saturated and unsaturated beta-hydroxyacyl-ACPs	cytosolic
WP_031418618.1 MULTISPECIES: alanine dehydrogenase [Lysinibacillus]	+	+	catalyzes a reversible conversion of L-alanine to pyruvate.	cytosolic
WP_031418629.1 MULTISPECIES: NADP-dependent isocitrate dehydrogenase [Lysinibacillus]	+	+	an important role in the formation of NADPH	cytosolic
WP_031418843.1 MULTISPECIES: TrkA family potassium uptake protein [Lysinibacillus]	+	+	regulate the transport activity	cytosolic
WP_031418973.1 MULTISPECIES: ATP-dependent DNA helicase RecG [Lysinibacillus]	+	+	recombination and DNA repair	cytosolic
WP_031419072.1 MULTISPECIES: (2Fe-2S)-binding protein [Lysinibacillus]	+	+	subunits of photosynthetic and respiratory electron transfer complexes	cytosolic
WP_031419316.1 MULTISPECIES: endopeptidase La [Lysinibacillus]	+	+	driving the process of moving unfolded proteins into the active site.	cytosolic
WP_036075467.1 MULTISPECIES: chaperonin GroEL [Lysinibacillus]	+	+	Protein folding	cytosolic
WP_036160354.1 MULTISPECIES: ATP-dependent zinc metalloprotease FtsH [Lysinibacillus]	+	+	quality control of integral membrane proteins	cytosolic
WP_036160542.1 MULTISPECIES: GNAT family N-acetyltransferase [Lysinibacillus]	+	+	aminoglycoside antibiotic resistance, transcription regulation	cytosolic
WP_036160583.1 MULTISPECIES: HAMP domain-containing histidine kinase [Lysinibacillus]	+	+	chemotaxis receptors	cytosolic
WP_036160656.1 MULTISPECIES: FtsX-like permease family protein [Lysinibacillus]	+	+	transport lipids targeted to the outer membrane across the inner membrane	cytosolic
WP_036160900.1 MULTISPECIES: GNAT family N-acetyltransferase [Lysinibacillus]	+	+	aminoglycoside antibiotic resistance, transcription regulation, protein acetylation and stress reaction	cytosolic
WP_036161073.1 MULTISPECIES: response regulator transcription factor [Lysinibacillus]	+	+	induce changes in gene expression in response to an external stimulus	cytosolic
WP_036161284.1 MULTISPECIES: toxic anion resistance protein [Lysinibacillus]	+	+	detrimental effects	cytosolic
WP_036161427.1 MULTISPECIES: N-acetylmuramoyl-L-alanine amidase [Lysinibacillus]	+	+	catalyzes a chemical reaction that cleaves the link between N-acetylmuramoyl residues and L-amino acid residues	Membrane (Cell wall)
WP_036161618.1 MULTISPECIES: MATE family efflux transporter [Lysinibacillus]	+	+	proton-dependent efflux transporters	cytosolic
WP_036161669.1 MULTISPECIES: DNA helicase RecQ [Lysinibacillus]	+	+	catalyzing the reaction ATP + H2O → ADP + P and thus driving the unwinding of paire	cytosolic
WP_036161697.1 MULTISPECIES: nitroreductase family protein [Lysinibacillus]	+	+	involved in the reduction of nitrogen-containing compounds,	cytosolic
WP_012292313.1 MULTISPECIES: acyl-CoA dehydrogenase family protein [Lysinibacillus]	+	+	catalyze the α,β-dehydrogenation of acyl-CoA esters in fatty acid and amino acid	cytosolic
WP_012292644.1 MULTISPECIES: LuxR C-terminal-related transcriptional regulator [Lysinibacillus]	+	+	transcriptional regulator	cytosolic
WP_012292692.1 MULTISPECIES: bacillithiol biosynthesis deacetylase BshB2 [Lysinibacillus]	+	+	deacetylase	cytosolic
WP_012293310.1 MULTISPECIES: polyribonucleotide nucleotidyltransferase [Lysinibacillus]	+	+	mRNA degradation	cytosolic
WP_012293805.1 MULTISPECIES: dynamin family protein [Lysinibacillus]	+	+	clathrin-dependent endocytosis and other vesicular trafficking	cytosolic
WP_012292245.1 MULTISPECIES: phosphoglycerate kinase [Lysinibacillus]	+	+	catalyzes the reaction of 1,3-Biphosphoglycerate	cytosolic
WP_012292640.1 MULTISPECIES: dipeptidase [Lysinibacillus]	+	+	hydrolyze bound pairs of amino acids	cytosolic
WP_012292731.1 MULTISPECIES: methylmalonyl-CoA mutase family protein [Lysinibacillus]	+	+	catalyzes the isomerization of methylmalonyl-CoA to succinyl-CoA in humans.	cytosolic
WP_012292768.1 MULTISPECIES: F0F1 ATP synthase subunit beta [Lysinibacillus]	+	+	hydrolysis of ATP in three separate catalytic sites	cytosolic
WP_012292787.1 MULTISPECIES: DUF5693 family protein [Lysinibacillus]	+	+	unknown	cytosolic
WP_012292923.1 MULTISPECIES: DUF4097 family beta strand repeat-containing protein [Lysinibacillus]	+	+	unknown	cytosolic
WP_012293081.1 MULTISPECIES ribonuclease J1 :[Lysinibacillus]	+	+	playing a role in both rRNA and mRNA stability and degradation	cytosolic
WP_012293094.1 MULTISPECIES: alpha-ketoacid dehydrogenase subunit beta [Lysinibacillus]	+	+	catalyzes the overall conversion of alpha-keto acids to acyl-CoA and CO2	cytosolic
WP_012293299.1 MULTISPECIES: proline--tRNA ligase [Lysinibacillus]	+	+	catalyse the attachment of an amino acid to its cognate transfer RNA	cytosolic
WP_012293332.1 MULTISPECIES: ribonuclease Y [Lysinibacillus]	+	+	initiates mRNA decay	cytosolic
WP_012293669.1 MULTISPECIES: 5'-nucleotidase C-terminal domain-containing protein [Lysinibacillus]	+	+	degrading extracellular 5'-nucleotides for nutritional needs	cytosolic
WP_012293796.1 MULTISPECIES: ABC transporter ATP-binding protein [Lysinibacillus]	+	+	Transportation	cytosolic
WP_012293828.1 MULTISPECIES: MarR family transcriptional regulator [Lysinibacillus]	+	+	Transcription regulator	cytosolic
WP_012293859.1 MULTISPECIES: hydantoinase/oxoprolinase family protein [Lysinibacillus]	+	+	catalyses the formation of L-glutamate from 5-oxo-L-proline	cytosolic
WP_010859802.1 MULTISPECIES: FHA domain-containing protein [Lysinibacillus]	+	-	recognize phosphothreonine epitopes on proteins.	cytosolic
WP_012291882.1 MULTISPECIES: ribose-phosphate diphosphokinase [Lysinibacillus]	+	-	catalyzes the transfer of pyrophosphate from ATP to ribose 5-phosphate	cytosolic
WP_012291887.1 MULTISPECIES: polysaccharide biosynthesis protein [Lysinibacillus]	+	-	polysaccharide biosynthesis	cytosolic
WP_012291990.1 MULTISPECIES: nicotinate phosphoribosyltransferase [Lysinibacillus]	+	-	controlling the level of NAD+	cytosolic
WP_012292015.1 MULTISPECIES: amidophosphoribosyltransferase [Lysinibacillus]	+	-	catalyzing the conversion of 5-phosphoribosyl-1-pyrophosphate (PRPP) into 5-phosphoribosyl-1-amine (PRA)	cytosolic
WP_012292053.1 MULTISPECIES: SpoVR family protein [Lysinibacillus]	+	-	spore cortex formation	cytosolic
WP_012292124.1 MULTISPECIES: D-2-hydroxyacid dehydrogenase [Lysinibacillus]	+	-	catalyzing the stereospecific, reversible reduction of 2-keto acids	cytosolic
WP_012292174.1 MULTISPECIES: rhodanese-related sulfurtransferase [Lysinibacillus]	+	-	Transferase activity	cytosolic
WP_012292275.1 MULTISPECIES: HNH endonuclease [Lysinibacillus]	+	-	stimulation of homologous recombination by nicking DNA	cytosolic
WP_012292344.1 MULTISPECIES: DUF86 domain-containing protein [Lysinibacillus]	+	-	unknown	cytosolic
WP_012292434.1 MULTISPECIES: universal stress protein [Lysinibacillus]	+	-	to protect the organism from environmental stress	cytosolic
WP_012292514.1 MULTISPECIES: DUF2252 family protein [Lysinibacillus]	+	-	unknown	cytosolic
WP_012292683.1 MULTISPECIES: aspartate aminotransferase family protein [Lysinibacillus]	+	-	catalyzes the reversible transfer of an α-amino group between aspartate and glutamate	cytosolic
WP_012292897.1 MULTISPECIES: flagellar protein FlgN [Lysinibacillus]	+	-	protects these two proteins from proteolysis in the cytoplasm	cytosolic
WP_012292930.1 MULTISPECIES: PDZ domain-containing protein [Lysinibacillus]	+	-	organizing and maintaining complex scaffolding formations	cytosolic
WP_012292940.1 MULTISPECIES: fumarylacetoacetate hydrolase family protein [Lysinibacillus]	+	-	cleaves fumarylacetoacetate at its carbon-carbon bond	cytosolic
WP_012292993.1 MULTISPECIES: sn-glycerol-3-phosphate ABC transporter ATP-binding protein UgpC [Lysinibacillus]	+	-	sn-glycerol-3-phosphate import	cytosolic
WP_012293022.1 MULTISPECIES: B12-binding domain-containing radical SAM protein [Lysinibacillus]	+	-	Catalytic activity	cytosolic
WP_012293064.1 MULTISPECIES: TlpA family protein disulfide reductase [Lysinibacillus]	+	-	unknown	cytosolic
WP_012293129.1 MULTISPECIES: DUF420 domain-containing protein [Lysinibacillus]	+	-	unknown	cytosolic
WP_012293148.1 MULTISPECIES: 2-dehydropantoate 2-reductase [Lysinibacillus]	+	-	catalyzes the chemical reaction -pantoate + NADP⁺	cytosolic
WP_012293150.1 MULTISPECIES: bacillithiol biosynthesis cysteine-adding enzyme BshC [Lysinibacillus]	+	-	cysteine-adding enzyme	cytosolic
WP_012293293.1 MULTISPECIES: UMP kinase [Lysinibacillus]	+	-	catalyses the phosphorylation of UMP by ATP to yield UDP and ADP	cytosolic
WP_012293346.1 MULTISPECIES: alkaline phosphatase family protein [Lysinibacillus]	+	-	Protein folding	cytosolic
WP_012293434.1 MULTISPECIES: DUF418 domain-containing protein [Lysinibacillus]	+	-	unknown	cytosolic
WP_012293479.1 MULTISPECIES: baseplate J/gp47 family protein [Lysinibacillus]	+	-	unknown	cytosolic
WP_012293492.1 MULTISPECIES: Na/Pi cotransporter family protein [Lysinibacillus]	+	-	intestinal Pi absorption.	cytosolic
WP_012293567.1 MULTISPECIES: YitT family protein [Lysinibacillus]	+	-	unknown	cytosolic
WP_012293588.1 MULTISPECIES: methyl-accepting chemotaxis protein [Lysinibacillus]	+	-	integral membrane proteins that undergo reversible methylation	cytosolic
WP_012293684.1 MULTISPECIES: NAD-dependent dihydropyrimidine dehydrogenase subunit PreA [Lysinibacillus]	+	-	reductive pyrimidine degradation (Pyd) pathway i	cytosolic
WP_012293715.1 MULTISPECIES: GHKL domain-containing protein [Lysinibacillus]	+	-	DNA structure rearrangement, heat shock, signal transduction, and DNA mismatch repair	cytosolic
WP_012293722.1 MULTISPECIES: TldD/PmbA family protein [Lysinibacillus]	+	-	regulate gyrase function.	cytosolic
WP_012293776.1 MULTISPECIES: carboxypeptidase M32 [Lysinibacillus]	+	-	cleave the C-terminal amino acid residue from peptides and proteins	cytosolic
WP_012293809.1 MULTISPECIES: methyl-accepting chemotaxis protein [Lysinibacillus]	+	-	reversible methylation during adaptation	cytosolic
WP_012293847.1 MULTISPECIES: general stress protein [Lysinibacillus]	+	-	Glycosyltransferase, Transferase ; Biological process, Stress response	cytosolic
WP_012293884.1 MULTISPECIES: glutamate-5-semialdehyde dehydrogenase [Lysinibacillus]	+	-	catalyzes the the reduction of γ-glutamyl phosphate to glutamate 5-semialdehyde	cytosolic
WP_012293901.1 MULTISPECIES: ABC transporter permease [Lysinibacillus]	+	-	Transport	cytosolic
WP_012293992.1 MULTISPECIES: ABC transporter ATP-binding protein [Lysinibacillus]	+	-	Transport	cytosolic
WP_012294038.1 MULTISPECIES: class II fumarate hydratase [Lysinibacillus]	+	-	catalyses the stereospecific interconversion of fumarate to L-malate	cytosolic
WP_012294088.1 MULTISPECIES: histidine phosphatase family protein [Lysinibacillus]	+	-	metabolic regulations	cytosolic
WP_012294116.1 MULTISPECIES: right-handed parallel beta-helix repeat-containing protein [Lysinibacillus]	+	-	Raffinose alpha galactosidase activity	cytosolic
WP_012295110.1 MULTISPECIES: hypothetical protein [Lysinibacillus]	+	-	unknown	cytosolic
WP_012295177.1 MULTISPECIES: phosphate ABC transporter ATP-binding protein PstB [Lysinibacillus]	+	-	Transportation	cytosolic
WP_012295234.1 MULTISPECIES: NAD(P)H-dependent oxidoreductase [Lysinibacillus]	+	-	Oxydation and reduction	cytosolic
WP_012295243.1 MULTISPECIES: DNA primase [Lysinibacillus]	+	-	replication, primer synthesis	cytosolic
WP_012295275.1 MULTISPECIES: hypothetical protein [Lysinibacillus]	+	-	unknown	cytosolic
WP_012295331.1 MULTISPECIES: chromate efflux transporter [Lysinibacillus]	+	-	membrane transporter	cytosolic
WP_012295336.1 MULTISPECIES: methyl-accepting chemotaxis protein [Lysinibacillus]	+	-	reversible methylation during adaptation	integral membrane
WP_012295578.1 MULTISPECIES: phenylalanine--tRNA ligase subunit beta [Lysinibacillus]	+	-	Protein biosynthesis	cytosolic
WP_012295634.1 MULTISPECIES: class I SAM-dependent methyltransferase [Lysinibacillus]	+	-	methylate proteins, small molecules, lipids, and nucleic acids.	cytosolic
WP_012295667.1 MULTISPECIES: site-specific integrase [Lysinibacillus]	+	-	DNA molecules are rearranged by breaking and rejoining the strands at specific points.	cytosolic
WP_012295681.1 MULTISPECIES: penicillin-binding protein [Lysinibacillus]	+	-	polymerization of the glycan strand	cytosolic
WP_012295713.1 MULTISPECIES: rRNA pseudouridine synthase [Lysinibacillus]	+	-	posttranscriptional modification of cellular RNAs	cytosolic
WP_012295733.1 MULTISPECIES: metalloregulator ArsR/SmtB family transcription factor [Lysinibacillus]	+	-	metalloregulatory transcriptional repressors	cytosolic
WP_012295782.1 MULTISPECIES: RNA polymerase sigma factor SigB [Lysinibacillus]	+	-	promote the attachment of RNA polymerase	cytosolic
WP_012295848.1 MULTISPECIES: sodium/proline symporter PutP [Lysinibacillus]	+	-	sodium-dependent uptake of extracellular L-proline	cytosolic
WP_012296147.1 MULTISPECIES: M14 family metallopeptidase [Lysinibacillus]	+	-	processing of bioactive peptides	cytosolic
WP_012296164.1 MULTISPECIES: decarboxylating NADP(+)-dependent phosphogluconate dehydrogenase [Lysinibacillus]	+	-	Gluconate metabolic pathway	cytosolic
WP_025115432.1 MULTISPECIES: RsfA family transcriptional regulator [Lysinibacillus]	+	-	improve the efficiency of sporulation by fine-tuning the expression of genes	cytosolic
WP_031416173.1 MULTISPECIES: MogA/MoaB family molybdenum cofactor biosynthesis protein [Lysinibacillus]	+	-	biosynthesis of the molybdenum cofactor	cytosolic
WP_031416324.1 MULTISPECIES: CPBP family intramembrane metalloprotease [Lysinibacillus]	+	-	metalloendopeptidase activity	cytosolic
WP_031416420.1 MULTISPECIES: ornithine carbamoyltransferase [Lysinibacillus]	+	-	catalyzes the reaction between ornithine and carbamoyl phosphate forming citrulline and inorganic phosphate	cytosolic
WP_031416614.1 MULTISPECIES: polysaccharide deacetylase family protein [Lysinibacillus]	+	-	catalyze the deacetylation of acetylated sugars	cytosolic
WP_031416796.1 MULTISPECIES: heptaprenylglyceryl phosphate synthase [Lysinibacillus]	+	-	building blocks	cytosolic
WP_031417420.1 MULTISPECIES: glycerophosphodiester phosphodiesterase [Lysinibacillus]	+	-	production of metabolic carbon and phosphate sources	cytosolic
WP_031417479.1 MULTISPECIES: energy-coupling factor ABC transporter permease [Lysinibacillus]	+	-	Transportation	cytosolic
WP_031417817.1 MULTISPECIES: response regulator transcription factor [Lysinibacillus]	+	-	induce changes in gene expression	cytosolic
WP_031417856.1 MULTISPECIES: GNAT family N-acetyltransferase [Lysinibacillus]	+	-	aminoglycoside antibiotic resistance, transcription regulation, protein acetylation and stress reaction	cytosolic
WP_031417906.1 MULTISPECIES: YdcF family protein [Lysinibacillus]	+	-	unknown	cytosolic
WP_031418055.1 MULTISPECIES: DUF5050 domain-containing protein [Lysinibacillus]	+	-	unknown	cytosolic
WP_031418479.1 MULTISPECIES: heterodisulfide reductase-related iron-sulfur binding cluster [Lysinibacillus]	+	-	catalyzes the reversible reduction	cytosolic
WP_031418910.1 MULTISPECIES: YceD family protein [Lysinibacillus]	+	-	Processing and stability of rRNA	cytosolic
WP_031419589.1 MULTISPECIES: lactate utilization protein C [Lysinibacillus]	+	-	essential for L-lactate degradation and allows cells to grow with lactate	cytosolic
WP_036125168.1 MULTISPECIES: isoleucine--tRNA ligase [Lysinibacillus]	+	-	Translation	cytosolic
WP_036160378.1 MULTISPECIES: ABC-F type ribosomal protection protein [Lysinibacillus]	+	-	translation factors as regulator of protein expression	cytosolic
WP_036160800.1 MULTISPECIES: DUF2268 domain-containing putative Zn-dependent protease [Lysinibacillus]	+	-	zinc-dependent protease	cytosolic
WP_036161093.1 MULTISPECIES: acryloyl-CoA reductase [Lysinibacillus]	+	-	involved in the pathway of L-alanine fermentation	cytosolic
WP_036161149.1 MULTISPECIES: LysM peptidoglycan-binding domain-containing protein [Lysinibacillus]	+	-	unknown	cytosolic
WP_036161200.1 MULTISPECIES: ABC-F type ribosomal protection protein [Lysinibacillus]	+	-	ribosomal protection mechanism	cytosolic
WP_036161340.1 MULTISPECIES: hypothetical protein [Lysinibacillus]	+	-	unknown	cytosolic
WP_036161353.1 MULTISPECIES: TetR/AcrR family transcriptional regulator [Lysinibacillus]	+	-	regulate gene expression	cytosolic
WP_036161510.1 MULTISPECIES: arsenate reductase (thioredoxin) [Lysinibacillus]	+	-	regenerate reduced cysteines	cytosolic
WP_036161614.1 MULTISPECIES: 3-hydroxyacyl-ACP dehydratase FabZ [Lysinibacillus]	+	-	fatty-acid elongation	cytosolic
WP_036161696.1 MULTISPECIES: carbamate kinase [Lysinibacillus]	+	-	Arginine metabolism,ATP-binding,	cytosolic
WP_036161702.1 MULTISPECIES: MBL fold metallo-hydrolase [Lysinibacillus]	+	-	hydrolytic enzymes	cytosolic
WP_036161794.1 MULTISPECIES: oxalate decarboxylase family bicupin [Lysinibacillus]	+	-	oxalate metabolic process	cytosolic
WP_036161940.1 MULTISPECIES: TetR/AcrR family transcriptional regulator [Lysinibacillus]	+	-	DNA binding factors that regulate gene expression	cytosolic
WP_036161991.1 MULTISPECIES: MFS transporter [Lysinibacillus]	+	-	membrane transport proteins	membrane
WP_036162023.1 MULTISPECIES: ABC transporter ATP-binding protein/permease [Lysinibacillus]	+	-	Transportation	membrane
WP_036162077.1 MULTISPECIES: alpha/beta hydrolase [Lysinibacillus]	+	-	hydrolysis of a number of different substrates including peptides, esters, lactones	cytosolic
WP_036162372.1 MULTISPECIES: M3 family oligoendopeptidase [Lysinibacillus]	+	-	Endopeptidase	cytosolic
WP_051563316.1 MULTISPECIES: glycosyltransferase family 4 protein [Lysinibacillus]	+	-	establish natural glycosidic linkages	cytosolic
WP_051563353.1 MULTISPECIES: thiamine phosphate synthase [Lysinibacillus]	+	-	catalyzes the coupling of carboxythiazole phosphate and hydroxymethyl pyrimidine pyrophosphate to give thiamin monophosphate	cytosolic
WP_054549978.1 MULTISPECIES: endonuclease MutS2 [Lysinibacillus]	+	-	endonuclease activity	cytosolic
WP_080695243.1 MULTISPECIES: DUF3889 domain-containing protein [Lysinibacillus]	+	-	unknown	cytosolic
WP_085961712.1 MULTISPECIES: IS3 family transposase [Lysinibacillus]	+	-	participate in compound transposons	cytosolic
WP_089986041.1 MULTISPECIES: uracil-DNA glycosylase [Lysinibacillus]	+	-	prevent mutagenesis by eliminating uracil	cytosolic
WP_099805038.1 MULTISPECIES: YggS family pyridoxal phosphate-dependent enzyme [Lysinibacillus]	+	-	pyridoxal phosphate binding	cytosolic
WP_126657341.1 MULTISPECIES: DRTGG domain-containing protein [Lysinibacillus]	+	-		cytosolic
WP_171821124.1 MULTISPECIES: DNA polymerase III subunit alpha [Lysinibacillus]	+	-	DNA Replicatipon	cytosolic
WP_197150523.1 MULTISPECIES: penicillin-binding protein 1A [Lysinibacillus]	+	-	associated with CBS domains	cytosolic
WP_202341242.1 MULTISPECIES: Nif3-like dinuclear metal center hexameric protein [Lysinibacillus]	+	-		cytosolic
WP_206701050.1 MULTISPECIES: 1-acyl-sn-glycerol-3-phosphate acyltransferase [Lysinibacillus]	+	-	the acylation of lysophosphatidic acid to form phosphatidic acid	cytosolic
WP_227256903.1 MULTISPECIES: YhcN/YlaJ family sporulation lipoprotein [Lysinibacillus]	+	-	sporulation resulting in formation of a cellular spore	cytosolic
WP_227256914.1 MULTISPECIES: acyltransferase family protein [Lysinibacillus]	+	-	phospholipid biosynthesis	cytosolic
WP_227256924.1 MULTISPECIES: ribonuclease HII [Lysinibacillus]	+	-	involved in the degradation of the ribonucleotide moiety on RNA-DNA hybrid	cytosolic
WP_233433797.1 MULTISPECIES: class A beta-lactamase-related serine hydrolase [Lysinibacillus]	+	-	Hydrolase	cytosolic
WP_241744838.1 MULTISPECIES: phage tail tape measure protein [Lysinibacillus]	+	-	dictates the tail length and facilitates DNA transit to the cell cytoplasm during infection	cytosolic
WP_241744839.1 MULTISPECIES: hypothetical protein [Lysinibacillus]	+	-		cytosolic
WP_010857015.1 MULTISPECIES: AbrB/MazE/SpoVT family DNA-binding domain-containing protein [Lysinibacillus]	+	-	AbrB/MazE/SpoVT family DNA-binding domain-containing protein	cytosolic
WP_012291984.1 MULTISPECIES: proline dehydrogenase family protein [Lysinibacillus]	+	-	conversion of proline to glutamate	cytosolic
WP_012292024.1 MULTISPECIES: DNA helicase PcrA [Lysinibacillus]	+	-	a monomeric translocase and utilizes ATP to unwind DNA	cytosolic
WP_004269405.1 MULTISPECIES: ribosome biogenesis GTPase YlqF [Lysinibacillus]	+	-	participate in the biogenesis of the 50S ribosomal subunit i	cytosolic
WP_008179143.1 MULTISPECIES: DUF2639 domain-containing protein [Lysinibacillus]	+	-		cytosolic
WP_008180348.1 MULTISPECIES: membrane protein insertion efficiency factor YidD [Lysinibacillus]	+	-	membrane protein insertion and folding	cytosolic
WP_010857552.1 MULTISPECIES: metal-sensitive transcriptional regulator [Lysinibacillus]	+	-	activate transcription from unusual promoters	cytosolic
WP_010858198.1 MULTISPECIES: DUF2187 family protein [Lysinibacillus]	+	-	unknown	cytosolic
WP_010858326.1 MULTISPECIES: division/cell wall cluster transcriptional repressor MraZ [Lysinibacillus]	+	-	Repressor of transcription	cytosolic
WP_012291782.1 MULTISPECIES: site-specific integrase [Lysinibacillus]	+	-	genetic recombination	cytosolic
WP_012291839.1 MULTISPECIES: asparagine synthase (glutamine-hydrolyzing) [Lysinibacillus]	+	-	cytoplasmic enzyme that generates asparagine from aspartate	cytosolic
WP_012291848.1 MULTISPECIES: heavy metal translocating P-type ATPase [Lysinibacillus]	+	-	believed to participate in the bacterium's heavy metal resistance traits	cytosolic
WP_012291874.1 MULTISPECIES: 16S rRNA (adenine(1518)-N(6)/adenine(1519)-N(6))-dimethyltransferase RsmA [Lysinibacillus]	+	-	responsible for dimethylation of 16S rRNA	cytosolic
WP_012291903.1 MULTISPECIES: aminodeoxychorismate/anthranilate synthase component II [Lysinibacillus]	+	-	catalyzes the formation of anthranilate using ammonia	cytosolic
WP_012291905.1 MULTISPECIES: dihydropteroate synthase [Lysinibacillus]	+	-	produces dihydropteroate	cytosolic
WP_012291919.1 MULTISPECIES: 4-hydroxy-tetrahydrodipicolinate synthase [Lysinibacillus]	+	-	involved in the production of lysine and precursor molecules	cytosolic
WP_012291997.1 MULTISPECIES: ABC transporter ATP-binding protein [Lysinibacillus]	+	-	Transportation	Membrane
WP_012292028.1 MULTISPECIES: Asp-tRNA(Asn)/Glu-tRNA(Gln) amidotransferase subunit GatA [Lysinibacillus]	+	-	Transcription regulation	cytosolic
WP_012292075.1 MULTISPECIES: exonuclease SbcCD subunit D [Lysinibacillus]	+	-	cleaves DNA hairpin structures	cytosolic
WP_012292082.1 MULTISPECIES: polyphosphate kinase [Lysinibacillus]	+	-	catalyzes the formation of polyphosphate from ATP	cytosolic
WP_012292132.1 MULTISPECIES: SDR family oxidoreductase [Lysinibacillus]	+	-	fatty acid and sugar metabolism, control of hormone ligand levels, transcriptional regulation	cytosolic
WP_012292144.1 MULTISPECIES: tRNA epoxyqueuosine(34) reductase QueG [Lysinibacillus]	+	-	catalyzes the conversion of oQ (presumably associated with Asp, Asn, His, and Tyr tRNA) to Q	cytosolic
WP_012292180.1 MULTISPECIES: peptidylprolyl isomerase [Lysinibacillus]	+	-	facilitate the cis–trans isomerisation of peptide bonds	cytosolic
WP_012292230.1 MULTISPECIES: thioredoxin-disulfide reductase [Lysinibacillus]	+	-	catalyze the reduction of thioredoxin	cytosolic
WP_012292243.1 MULTISPECIES: central glycolytic genes regulator [Lysinibacillus]	+	-	Transcription regulation	cytosolic
WP_012292249.1 MULTISPECIES: DUF6241 domain-containing protein [Lysinibacillus]	+	-	Unknown	cytosolic
WP_012292331.1 MULTISPECIES: cysteine desulfurase [Lysinibacillus]	+	-	catalyzes the conversion of L-cysteine to L-alanine	cytosolic
WP_012292335.1 MULTISPECIES: DUF72 domain-containing protein [Lysinibacillus]	+	-	Unknown	cytosolic
WP_012292372.1 MULTISPECIES: phosphoadenylyl-sulfate reductase [Lysinibacillus]	+	-	oxidoreductases	cytosolic
WP_012292450.1 MULTISPECIES: methyl-accepting chemotaxis protein [Lysinibacillus]	+	-	reversible methylation during adaptation	Membrane
WP_012292453.1 MULTISPECIES: VanZ family protein [Lysinibacillus]	+	-	protect bacteria from lipoglycopeptide antibiotics	cytosolic
WP_012292471.1 MULTISPECIES: AraC family transcriptional regulator [Lysinibacillus]	+	-	Regulation of Transcription	cytosolic
WP_012292487.1 MULTISPECIES: response regulator transcription factor [Lysinibacillus]	+	-	induce changes in gene expression in response to an external stimulus	cytosolic
WP_012292501.1 MULTISPECIES: sensor histidine kinase [Lysinibacillus]	+	-	major chemoreceptor system	cytosolic
WP_012292528.1 MULTISPECIES: serine hydrolase [Lysinibacillus]	+	-	physiological functions, including digestion, immune response, blood coagulation, and reproduction	cytosolic
WP_012292559.1 MULTISPECIES: SNF2-related protein [Lysinibacillus]	+	-	Transcription regulation	cytosolic
WP_012292565.1 MULTISPECIES: CoA transferase subunit A [Lysinibacillus]	+	-	catalyse reversible transfer reactions of coenzyme A groups	cytosolic
WP_012292593.1 MULTISPECIES: dipeptide epimerase [Lysinibacillus]	+	-	catalyze the epimerization of dipeptides	cytosolic
WP_012292605.1 MULTISPECIES: glycerol-3-phosphate acyltransferase [Lysinibacillus]	+	-	catalyzes the conversion of glycerol-3-phosphate and long-chain acyl-CoA to lysophosphatidic acid	cytosolic
WP_012292623.1 MULTISPECIES: saccharopine dehydrogenase NADP-binding domain-containing protein [Lysinibacillus]	+	-	metabolism of the amino acid lysine	cytosolic
WP_012292704.1 MULTISPECIES: lipoate--protein ligase family protein [Lysinibacillus]	+	-	to scavenge lipoic acid from the environment and attach the coenzyme to its cognate proteins	cytosolic
WP_012292711.1 MULTISPECIES: PBP1A family penicillin-binding protein [Lysinibacillus]	+	-	biosynthesis of peptidoglycan	cytosolic
WP_012292715.1 MULTISPECIES: DUF1934 domain-containing protein [Lysinibacillus]	+	-	Unknown	cytosolic
WP_012292738.1 MULTISPECIES: fructose-6-phosphate aldolase [Lysinibacillus]	+	-	Metabolism of aldolase	cytosolic
WP_012292749.1 MULTISPECIES: thymidine kinase [Lysinibacillus]	+	-	catalyzes the addition of a gamma-phosphate group to thymidine	cytosolic
WP_012292890.1 MULTISPECIES: sensor histidine kinase [Lysinibacillus]	+	-	chemoreceptor system	cytosolic
WP_012292898.1 MULTISPECIES: flagellar hook-associated protein FlgK [Lysinibacillus]	+	-	bacterial pathogenesis	cytosolic
WP_012292903.1 MULTISPECIES: DUF115 domain-containing protein [Lysinibacillus]	+	-	unknown	cytosolic
WP_012292908.1 MULTISPECIES: acylneuraminate cytidylyltransferase family protein [Lysinibacillus]	+	-	Catalyzes the activation of N-acetylneuraminic acid (NeuNAc) to cytidine 5'-monophosphate N-acetylneuraminic acid	cytosolic
WP_012292950.1 MULTISPECIES: AAA family ATPase [Lysinibacillus]	+	-	essential for many cellular functions.	cytosolic
WP_012293075.1 MULTISPECIES: bifunctional lysylphosphatidylglycerol flippase/synthetase MprF [Lysinibacillus]	+	-	resistance to the CAMP-like antibiotic daptomycin	cytosolic
WP_012293077.1 MULTISPECIES: family 10 glycosylhydrolase [Lysinibacillus]	+	-	hydrolyse the glycosidic bond between two or more carbohydrates	cytosolic
WP_012293121.1 MULTISPECIES: pyruvate carboxylase [Lysinibacillus]	+	-	physiologically irreversible carboxylation of pyruvate to form oxaloacetate	cytosolic
WP_012293147.1 MULTISPECIES: transcriptional regulator [Lysinibacillus]	+	-	Regulation of Transcription	cytosolic
WP_012293155.1 MULTISPECIES: stage V sporulation protein D [Lysinibacillus]	+	-	peptidoglycan biosynthesis	cytosolic
WP_012293158.1 MULTISPECIES: putative lipid II flippase FtsW [Lysinibacillus]	+	-	cell division Source regulation of cell shape	cytosolic
WP_012293186.1 MULTISPECIES: carbamoyl phosphate synthase small subunit [Lysinibacillus]	+	-	catalyses the hydrolysis of glutamine to ammonia	cytosolic
WP_012293188.1 MULTISPECIES: dihydroorotate dehydrogenase electron transfer subunit [Lysinibacillus]	+	-	electron transport chain	cytosolic
WP_012293225.1 MULTISPECIES: L-serine ammonia-lyase, iron-sulfur-dependent, subunit alpha [Lysinibacillus]	+	-	gluconeogenesis	cytosolic
WP_012293243.1 MULTISPECIES: signal recognition particle protein [Lysinibacillus]	+	-	recognizes and targets specific proteins to the plasma membrane	cytosolic
WP_012293250.1 MULTISPECIES: EscU/YscU/HrcU family type III secretion system export apparatus switch protein [Lysinibacillus]	+	-	Protein secretion	membrane
WP_012293277.1 MULTISPECIES: flagellar type III secretion system protein FliR [Lysinibacillus]	+	-	export substrate proteins across the inner membrane	membrane
WP_012293288.1 MULTISPECIES: hypothetical protein [Lysinibacillus]	+	-		membrane
WP_012293298.1 MULTISPECIES: RIP metalloprotease RseP [Lysinibacillus]	+	-	regulated intramembrane proteolysis	membrane
WP_012293317.1 MULTISPECIES: 4-hydroxy-tetrahydrodipicolinate synthase [Lysinibacillus]	+	-	involved in the production of lysine and precursor molecules for peptidoglycan synthesis	cytosolic
WP_012293325.1 MULTISPECIES: insulinase family protein [Lysinibacillus]	+	-	catalyses the degradation reaction of insulin, glucagon and other polypeptides.	cytosolic
WP_012293342.1 MULTISPECIES: 2-oxoacid:acceptor oxidoreductase subunit alpha [Lysinibacillus]	+	-	oxidative decarboxylation of 2-oxoacids.	cytosolic
WP_012293351.1 MULTISPECIES: histidinol phosphate phosphatase domain-containing protein [Lysinibacillus]	+	-	catalyzes the penultimate step in the biosynthesis of l-histidine	cytosolic
WP_012293387.1 MULTISPECIES: GNAT family N-acetyltransferase [Lysinibacillus]	+	-	minoglycoside antibiotic resistance, transcription regulation	cytosolic
WP_012293392.1 MULTISPECIES: sensor histidine kinase [Lysinibacillus]	+	-	signal transduction across the cellular membrane	membrane
WP_012293406.1 MULTISPECIES: site-specific tyrosine recombinase XerD [Lysinibacillus]	+	-	catalyzing the cutting and rejoining of the recombining DNA molecules	cytosolic
WP_012293419.1 MULTISPECIES: thiol-disulfide oxidoreductase ResA [Lysinibacillus]	+	-	Oxidoreductase Cytochrome c-type biogenesis	membrane
WP_012293449.1 MULTISPECIES: guanine deaminase [Lysinibacillus]	+	-	converts guanine to xanthine.	cytosolic
WP_012293452.1 MULTISPECIES: methyltransferase domain-containing protein [Lysinibacillus]	+	-	catalyze the transfer of a methyl group from the SAM to their substrates	cytosolic
WP_012293467.1 MULTISPECIES: DnaD domain protein [Lysinibacillus]	+	-	replication initiation and membrane attachment proteins	cytosolic
WP_012293609.1 MULTISPECIES: NAD(P)H-dependent glycerol-3-phosphate dehydrogenase [Lysinibacillus]	+	-	catalyzes the reversible reduction of dihydroxyacetone phosphate to glycerol-3-phosphate	cytosolic
WP_012293617.1 MULTISPECIES: heptaprenyl diphosphate synthase component 1 [Lysinibacillus]	+	-	unknown	cytosolic
WP_012293646.1 MULTISPECIES: histidinol-phosphate transaminase [Lysinibacillus]	+	-	catalyzes the transfer of the amino group of l-histidinol phosphate (Hsp) to 2-oxoglutarate to form imidazole acetol phosphate (IAP) and glutamate	cytosolic
WP_012293723.1 MULTISPECIES: TldD/PmbA family protein [Lysinibacillus]	+	-	metallopeptidase activity	cytosolic
WP_012293758.1 MULTISPECIES: class I SAM-dependent RNA methyltransferase [Lysinibacillus]	+	-	cofactor to methylate proteins, small molecules, lipids, and nucleic acids.	cytosolic
WP_012293767.1 MULTISPECIES: ethanolamine ammonia-lyase subunit EutC [Lysinibacillus]	+	-	amino acid metabolism	cytosolic
WP_012293844.1 MULTISPECIES: SEC-C domain-containing protein [Lysinibacillus]	+	-	DNA Recombination	cytosolic
WP_012293865.1 MULTISPECIES: ABC-F family ATP-binding cassette domain-containing protein [Lysinibacillus]	+	-	Transportation	membrane
WP_012293877.1 MULTISPECIES: PucR family transcriptional regulator [Lysinibacillus]	+	-	transcriptional activator	cytosolic
WP_012293973.1 MULTISPECIES: iron ABC transporter permease [Lysinibacillus]	+	-	transmembrane transport	membrane
WP_012294094.1 MULTISPECIES: ABC transporter ATP-binding protein/permease [Lysinibacillus]	+	-	transmembrane transport	membrane
WP_012294158.1 MULTISPECIES: DMT family transporter [Lysinibacillus]	+	-	Transportation	membrane
WP_012294159.1 MULTISPECIES: bile acid:sodium symporter family protein [Lysinibacillus]	+	-	solute transport across cytoplasmic membranes	membrane
WP_012294672.1 MULTISPECIES: DNA ligase D [Lysinibacillus]	+	-	joining breaks in the phosphodiester backbone of DNA that occur during replication and recombination,DNA repair	cytosolic
WP_012295111.1 MULTISPECIES: hypothetical protein [Lysinibacillus]	+	-	unknown	cytosolic
WP_012295137.1 MULTISPECIES: pentapeptide repeat-containing protein [Lysinibacillus]	+	-	folding of a novel right-handed quadrilateral beta-helix	cytosolic
WP_012295161.1 MULTISPECIES: Flp pilus assembly complex ATPase component TadA [Lysinibacillus]	+	-	ATP binding	cytosolic
WP_012295162.1 MULTISPECIES: transcriptional regulator [Lysinibacillus]	+	-	Transcription regulation	cytosolic
WP_012295163.1 MULTISPECIES: MBL fold metallo-hydrolase [Lysinibacillus]	+	-	Hydrolase activity	cytosolic
WP_012295214.1 MULTISPECIES: ABC transporter ATP-binding protein [Lysinibacillus]	+	-	Transportation	membrane
WP_012295223.1 MULTISPECIES: response regulator transcription factor [Lysinibacillus]	+	-	Regulatin of transcription	cytosolic
WP_012295244.1 MULTISPECIES: glycine--tRNA ligase [Lysinibacillus]	+	-	encodes glycyl-tRNA synthetase	cytosolic
WP_012295253.1 MULTISPECIES: HD family phosphohydrolase [Lysinibacillus]	+	-	phosphohydrolase activity	cytosolic
WP_012295257.1 MULTISPECIES: hypothetical protein [Lysinibacillus]	+	-	unknown	cytosolic
WP_012295282.1 MULTISPECIES: bacteriophage regulatory protein [Lysinibacillus]	+	-	transcriptional regulation, DNA replication	cytosolic
WP_012295287.1 MULTISPECIES: phage major tail tube protein [Lysinibacillus]	+	-	genome injection	cytosolic
WP_012295295.1 MULTISPECIES: Clp protease ClpP [Lysinibacillus]	+	-	cleaves peptides and various proteins	cytosolic
WP_012295296.1 MULTISPECIES: phage portal protein [Lysinibacillus]	+	-	forms a channel for bidirectional passage	cytosolic
WP_012295330.1 MULTISPECIES: radical SAM family heme chaperone HemW [Lysinibacillus]	+	-		cytosolic
WP_012295342.1 MULTISPECIES: GNAT family N-acetyltransferase [Lysinibacillus]	+	-	catalyze the transfer of the acetyl from the CoA donor to a primary amine of the acceptor	cytosolic
WP_012295365.1 MULTISPECIES: 30S ribosomal protein S20 [Lysinibacillus]	+	-	required for the insertion of heme b into respiratory chain enzymes	cytosolic
WP_012295386.1 MULTISPECIES: U32 family peptidase [Lysinibacillus]	+	-	degrades type I collagen	cytosolic
WP_012295399.1 MULTISPECIES: phosphoribosylformimino-5-aminoimidazole carboxamide ribotide isomerase [Lysinibacillus]	+	-	histidine biosynthetic process	cytosolic
WP_012295401.1 MULTISPECIES: GTP pyrophosphokinase family protein [Lysinibacillus]	+	-	guanosine tetraphosphate biosynthetic process	cytosolic
WP_012295403.1 MULTISPECIES: tetratricopeptide repeat protein [Lysinibacillus]	+	-	form scaffolds to mediate protein–protein interactions and often the assembly of multiprotein complexes	cytosolic
WP_012295420.1 MULTISPECIES: N-acetylmuramoyl-L-alanine amidase [Lysinibacillus]	+	-	catalyzes a chemical reaction that cleaves the link between N-acetylmuramoyl residues and L-amino acid residues in certain cell-wall glycopeptides.	cytosolic
WP_012295480.1 MULTISPECIES: porphobilinogen synthase [Lysinibacillus]	+	-	biosynthesis of all tetrapyrroles, which function in respiration, photosynthesis, and methanogenesis	cytosolic
WP_012295566.1 MULTISPECIES: excinuclease ABC subunit UvrC [Lysinibacillus]	+	-	Nucleotide excision repair	cytosolic
WP_012295579.1 MULTISPECIES: phenylalanine--tRNA ligase subunit alpha [Lysinibacillus]	+	-	Protein Biosynthesis	cytosolic
WP_012295593.1 MULTISPECIES: transporter substrate-binding domain-containing protein [Lysinibacillus]	+	-	Transportation	membrane
WP_012295609.1 MULTISPECIES: DNA polymerase I [Lysinibacillus]	+	-	DNA Replication	cytosolic
WP_012295646.1 MULTISPECIES: septation ring formation regulator EzrA [Lysinibacillus]	+	-	Cell cycle, Cell division, Septation	cytosolic
WP_012295691.1 MULTISPECIES: catabolite control protein A [Lysinibacillus]	+	-	catabolite control, specifically during growth on glucose or galactose	cytosolic
WP_012295709.1 MULTISPECIES: D-amino-acid transaminase [Lysinibacillus]	+	-	catalyzes an alpha,beta elimination from the D isomer of beta-chloroalanine to yield equivalent amounts of pyruvate, chloride, and ammonia	cytosolic
WP_012295721.1 MULTISPECIES: amidohydrolase family protein [Lysinibacillus]	+	-	catalyze hydrolytic reactions	cytosolic
WP_012295728.1 MULTISPECIES: response regulator [Lysinibacillus]	+	-	the output components of two-component systems, which couple the sensing of environmental stimuli to adaptive responses.	cytosolic
WP_012295776.1 MULTISPECIES: L-aspartate oxidase [Lysinibacillus]	+	-	catalyses the first step in the de novo biosynthesis of NAD+ in some bacteria	cytosolic
WP_012295793.1 MULTISPECIES: PH domain-containing protein [Lysinibacillus]	+	-	recruiting proteins to different membranes	membrane
WP_012295854.1 MULTISPECIES: MMPL family transporter [Lysinibacillus]	+	-	translocate complex, virulence-associated envelope lipids and siderophores across the plasma membrane to the periplasmic space	Cytosolic
WP_012295880.1 MULTISPECIES: c-type cytochrome [Lysinibacillus]	+	-	Electron transport	mitochondrial membrane
WP_012295881.1 MULTISPECIES: DsbA family oxidoreductase [Lysinibacillus]	+	-	catalyzes intrachain disulfide bond formation as peptides emerge into the cell's periplasm.	Cytosolic
WP_012295888.1 MULTISPECIES: rhodanese-like domain-containing protein [Lysinibacillus]	+	-	required for anchoring ferredoxin--NADP reductase to the thylakoid membranes	Cytosolic
WP_012295897.1 MULTISPECIES: methyl-accepting chemotaxis protein [Lysinibacillus]	+	-	process environmental and intracellular sensory (input) signals and alter the activity of the CheA histidine kinase.	Cytosolic
WP_012295905.1 MULTISPECIES: isoprenylcysteine carboxyl methyltransferase family protein [Lysinibacillus]	+	-	carry out carboxyl methylation	Cytosolic
WP_012295980.1 MULTISPECIES: NAD(P)H-dependent oxidoreductase [Lysinibacillus]	+	-	atalyze the reduction or oxidation of a substrate	Cytosolic
WP_012296047.1 MULTISPECIES: tRNA pseudouridine(38-40) synthase TruA [Lysinibacillus]	+	-	tRNA pseudouridine synthesis	Cytosolic
WP_012296086.1 MULTISPECIES: 23S rRNA (guanosine(2251)-2'-O)-methyltransferase RlmB [Lysinibacillus]	+	-	catalyzes the methylation of guanosine	Cytosolic
WP_012296137.1 MULTISPECIES: methyl-accepting chemotaxis protein [Lysinibacillus]	+	-	reversible methylation during adaptation	integral membrane
WP_012296163.1 MULTISPECIES: GntP family permease [Lysinibacillus]	+	-	gluconate transmembrane transporter activity	Cytosolic
WP_012296165.1 MULTISPECIES: diguanylate cyclase [Lysinibacillus]	+	-	participate in the formation of the ubiquitous second messenger, cyclic-di-GMP, involved in bacterial biofilm formation and persistence	Cytosolic
WP_012296182.1 MULTISPECIES: PLP-dependent aminotransferase family protein [Lysinibacillus]	+	-	involved in metabolic pathways like amino acid biosynthesis and degradation, biosynthesis of antibacterial compounds, utilization of nucleotides as well as in iron and carbon metabolism	Cytosolic
WP_012296214.1 MULTISPECIES: acyl-CoA dehydrogenase [Lysinibacillus]	+	-	fatty acid β-oxidation	Cytosolic
WP_024363689.1 MULTISPECIES: isochorismate synthase [Lysinibacillus]	+	-	isomerase enzyme	Cytosolic
WP_031415896.1 MULTISPECIES: diphthine--ammonia ligase [Lysinibacillus]	+	-	diphthamide biosynthesis	Cytosolic
WP_031416433.1 MULTISPECIES: NCS2 family permease [Lysinibacillus]	+	-	allow chemical communication between organelles	integral membrane
WP_031416459.1 MULTISPECIES: isochorismate synthase [Lysinibacillus]	+	-	biosynthesis of vitamin K	Cytosolic
WP_031417022.1 MULTISPECIES: tRNA (adenine(22)-N(1))-methyltransferase TrmK [Lysinibacillus]	+	-	methyltransferase activity	Cytosolic
WP_031417064.1 MULTISPECIES: VOC family protein [Lysinibacillus]	+	-	unknown	Cytosolic
WP_031417498.1 MULTISPECIES: uroporphyrinogen-III C-methyltransferase [Lysinibacillus]	+	-	catalyses two methylation reactions	Cytosolic
WP_031417701.1 MULTISPECIES: bifunctional metallophosphatase/5'-nucleotidase [Lysinibacillus]	+	-	Hydrolase	Cytosolic
WP_031418022.1 MULTISPECIES: SafA/ExsA family spore coat assembly protein [Lysinibacillus]	+	-	unknown	Cytosolic
WP_031418406.1 MULTISPECIES: acyl-CoA dehydrogenase [Lysinibacillus]	+	-	fatty acid β-oxidation	Cytosolic
WP_031418434.1 MULTISPECIES: tryptophan synthase subunit beta [Lysinibacillus]	+	-	biosynthesis of tryptophan	Cytosolic
WP_031418485.1 MULTISPECIES: DNA-directed RNA polymerase subunit delta [Lysinibacillus]	+	-	increased specificity of transcription	Cytosolic
WP_031418489.1 MULTISPECIES: UDP-N-acetylglucosamine 1-carboxyvinyltransferase [Lysinibacillus]	+	-	peptidoglycan biosynthesis	Cytosolic
WP_031418655.1 MULTISPECIES: RraA family protein [Lysinibacillus]	+	-	modulating the ribonucleolytic activity	Cytosolic
WP_031418785.1 MULTISPECIES: glycine betaine ABC transporter substrate-binding protein [Lysinibacillus]	+	-	Transportation	membrane
WP_031418807.1 MULTISPECIES: UDP-N-acetylmuramoyl-L-alanyl-D-glutamate--2,6-diaminopimelate ligase [Lysinibacillus]	+	-	biosynthesis of bacterial cell-wall peptidoglycan.	Cytosolic
WP_031419015.1 MULTISPECIES: CDP-diacylglycerol--glycerol-3-phosphate 3-phosphatidyltransferase [Lysinibacillus]	+	-	synthesis of the acidic phospholipids.	membrane
WP_031419090.1 MULTISPECIES: cell wall-active antibiotics response protein LiaF [Lysinibacillus]	+	-	senses antimicrobial molecules and regulates changes in CM phospholipid architecture	membrane
WP_031419281.1 MULTISPECIES: phosphoribosylanthranilate isomerase [Lysinibacillus]	+	-	synthesis of the amino acid tryptophan.	Cytosolic
WP_031419310.1 MULTISPECIES: cytochrome c biogenesis protein CcsA [Lysinibacillus]	+	-	biogenesis of c-type cytochromes	membrane
WP_031419598.1 MULTISPECIES: DUF1659 domain-containing protein [Lysinibacillus]	+	-	unknown	Cytosolic
WP_031419624.1 MULTISPECIES: glucosaminidase domain-containing protein [Lysinibacillus]	+	-	unknown	Cytosolic
WP_031419674.1 MULTISPECIES: DUF3986 family protein [Lysinibacillus]	+	-	unknown	Cytosolic
WP_031419709.1 MULTISPECIES: translation elongation factor 4 [Lysinibacillus]	+	-	catalyze the back-translocation reaction on posttranslocation state ribosomes,	Cytosolic
WP_031419759.1 MULTISPECIES: stalk domain-containing protein [Lysinibacillus]	+	-		Cytosolic
WP_031419892.1 MULTISPECIES: (4Fe-4S)-binding protein [Lysinibacillus]	+	-	involved in membrane remodelling	Cytosolic
WP_036075119.1 MULTISPECIES: phage portal protein [Lysinibacillus]	+	-	a channel for bidirectional passage of viral DNA	Cytosolic
WP_036119560.1 MULTISPECIES: DRTGG domain-containing protein [Lysinibacillus]	+	-		Cytosolic
WP_036121380.1 MULTISPECIES: riboflavin biosynthesis protein RibF [Lysinibacillus]	+	-	synthesizes FAD from FMN.	Cytosolic
WP_036122138.1 MULTISPECIES: YbaB/EbfC family nucleoid-associated protein [Lysinibacillus]	+	-	binding and altering DNA conformation	Cytosolic
WP_036122959.1 MULTISPECIES: arginine--tRNA ligase [Lysinibacillus]	+	-	the attachment of specific amino acids to cognate tRNAs during protein synthesis	Cytosolic
WP_036126679.1 MULTISPECIES: tryptophan--tRNA ligase [Lysinibacillus]	+	-	catalyzes the ligation of tryptophan to its cognate tRNA during translation	Cytosolic
WP_036160363.1 MULTISPECIES: FAD-binding oxidoreductase [Lysinibacillus]	+	-	catalyzes the oxidation of neutral and basic D-amino acids into their corresponding keto acids	Cytosolic
WP_036160442.1 MULTISPECIES: SGNH/GDSL hydrolase family protein [Lysinibacillus]	+	-	carboxylic ester hydrolase activity	Cytosolic
WP_036160521.1 MULTISPECIES: Dam family site-specific DNA-(adenine-N6)-methyltransferase [Lysinibacillus]	+	-	Methyltransferase activity	Cytosolic
WP_036160608.1 MULTISPECIES: methyl-accepting chemotaxis protein [Lysinibacillus]	+	-	reversible methylation during adaptation	Cytosolic
WP_036160867.1 MULTISPECIES: VOC family protein [Lysinibacillus]	+	-	aromatic compound catabolic process	Cytosolic
WP_036160873.1 MULTISPECIES: SDR family oxidoreductase [Lysinibacillus]	+	-	catalyzing the redox of the hydroxyl/ketone group of the hormone.	Cytosolic
WP_036160903.1 MULTISPECIES: sensor histidine kinase [Lysinibacillus]	+	-	chemoreceptor system	membrane
WP_036161026.1 MULTISPECIES: substrate-binding domain-containing protein [Lysinibacillus]	+	-	part of ATP-binding cassette transporters for substrate uptake, ion gradient driven transporters	membrane
WP_036161132.1 MULTISPECIES: GNAT family N-acetyltransferase [Lysinibacillus]	+	-	catalyze the transfer of the acetyl from the CoA donor to a primary amine of the acceptor	Cytosolic
WP_036161224.1 MULTISPECIES: DnaD domain-containing protein [Lysinibacillus]	+	-	Protein folding	Cytosolic
WP_036161280.1 MULTISPECIES: ABC transporter ATP-binding protein [Lysinibacillus]	+	-	Transportation	membrane
WP_036161316.1 MULTISPECIES: HAMP domain-containing histidine kinase [Lysinibacillus]	+	-	central signal converters in bacterial chemotaxis receptors	membrane
WP_036161318.1 MULTISPECIES: response regulator transcription factor [Lysinibacillus]	+	-	Regulatory	Cytosolic
WP_036161424.1 MULTISPECIES: DnaD domain protein [Lysinibacillus]	+	-	recruit the replication fork helicase onto the DNA.	Cytosolic
WP_036161492.1 MULTISPECIES: Ger(x)C family spore germination protein [Lysinibacillus]	+	-	germinant receptors	Cytosolic
WP_036161535.1 MULTISPECIES: FMN-binding negative transcriptional regulator [Lysinibacillus]	+	-	Regulatory	Cytosolic
WP_036161568.1 MULTISPECIES: S9 family peptidase [Lysinibacillus]	+	-	oligopeptidase	Cytosolic
WP_036161681.1 MULTISPECIES: Ger(x)C family spore germination protein [Lysinibacillus]	+	-	germination of spore	Cytosolic
WP_036161718.1 MULTISPECIES: DNA-3-methyladenine glycosylase [Lysinibacillus]	+	-	recognition of a variety of base lesions, including alkylated and deaminated purines, and initiating their repair via the base excision repair	Cytosolic
WP_036161726.1 MULTISPECIES: Hsp33 family molecular chaperone HslO [Lysinibacillus]	+	-	conformational folding of proteins	Cytosolic
WP_036161754.1 MULTISPECIES: DUF4085 family protein [Lysinibacillus]	+	-	unknown	Cytosolic
WP_036161772.1 MULTISPECIES: TatD family hydrolase [Lysinibacillus]	+	-	Hydrolase activity	Cytosolic
WP_036161829.1 MULTISPECIES: 7-carboxy-7-deazaguanine synthase QueE [Lysinibacillus]	+	-	catalyzes a key step in the biosynthesis of 7-deazapurine containing natural products	Cytosolic
WP_036162045.1 MULTISPECIES: S8 family serine peptidase [Lysinibacillus]	+	-	cleave peptide bonds in proteins	Cytosolic
WP_036162046.1 MULTISPECIES: glycosyltransferase [Lysinibacillus]	+	-	responsible for the initiation and elongation of glycan chains on mucins	Cytosolic
WP_036162138.1 MULTISPECIES: diguanylate cyclase [Lysinibacillus]	+	-	atalyzes the chemical reaction: 2 Guanosine triphosphate ↔ 2 diphosphate + cyclic di-3',5'-guanylate	Cytosolic
WP_036162184.1 MULTISPECIES: DUF6148 family protein [Lysinibacillus]	+	-	Unknown	Cytosolic
WP_036162327.1 MULTISPECIES: DMT family transporter [Lysinibacillus]	+	-	Transportation	membrane
WP_036162376.1 MULTISPECIES: methyl-accepting chemotaxis protein [Lysinibacillus]	+	-	reversible methylation during adaptation	Integral membrane
WP_036162416.1 MULTISPECIES: DUF4272 domain-containing protein [Lysinibacillus]	+	-	Unknown	Cytosolic
WP_036162422.1 MULTISPECIES: D-alanine--D-alanine ligase [Lysinibacillus]	+	-	catalyzes the chemical reaction ATP + 2 D-alanine \rightleftharpoons ADP + phosphate + D-alanyl-D-alanine	Cytosolic
WP_036162483.1 MULTISPECIES: DUF4263 domain-containing protein [Lysinibacillus]	+	-	Unknown	Cytosolic
WP_036162490.1 MULTISPECIES: peptidoglycan DD-metalloendopeptidase family protein [Lysinibacillus]	+	-	Unknown	membrane
WP_036162492.1 MULTISPECIES: DHH family phosphoesterase [Lysinibacillus]	+	-	DNA repair and recombination pathways.	Cytosolic
WP_036162511.1 MULTISPECIES: 23S rRNA (uracil(1939)-C(5))-methyltransferase RlmD [Lysinibacillus]	+	-	Catalyzes the formation of 5-methyl-uridine	Cytosolic
WP_036162649.1 MULTISPECIES: VanW family protein [Lysinibacillus]	+	-	Unknown	Cytosolic
WP_036162843.1 MULTISPECIES: glycosyltransferase [Lysinibacillus]	+	-	responsible for the initiation and elongation of glycan chains on mucins	Cytosolic
WP_036162896.1 MULTISPECIES: amino acid permease [Lysinibacillus]	+	-	involved in the transport of amino acids into the cell	membrane
WP_036196570.1 MULTISPECIES: helix-turn-helix domain-containing protein [Lysinibacillus]	+	-	regulate gene expression.	Cytosolic
WP_036225403.1 MULTISPECIES: nucleoside deaminase [Lysinibacillus]	+	-	involved in the pyrimidine salvage pathway and maintains the cellular pyrimidine supply	Cytosolic
WP_053596416.1 MULTISPECIES: stalk domain-containing protein [Lysinibacillus]	+	-	a transmembrane domain	Cytosolic
WP_058843384.1 MULTISPECIES: pyruvate kinase [Lysinibacillus]	+	-	Glycolysis	Cytosolic
WP_068983754.1 MULTISPECIES: tRNA preQ1(34) S-adenosylmethionine ribosyltransferase-isomerase QueA [Lysinibacillus]	+	-	formation of the 2,3-epoxy-4,5-dihydroxycyclopentane ring of epoxyqueuosine (oQ)	Cytosolic
WP_068983953.1 MULTISPECIES: dephospho-CoA kinase [Lysinibacillus]	+	-	catalyzes the ATP-dependent phosphorylation of dephospho-CoA	Cytosolic
WP_068986884.1 MULTISPECIES: isochorismate synthase [Lysinibacillus]	+	-	catalyzes the first step in the biosynthesis of vitamin K	Cytosolic
WP_069480562.1 MULTISPECIES: BhlA/UviB family holin-like peptide [Lysinibacillus]	+	-	putative holin-like peptides encoded in bacteria with bacteriocin similarities	Cytosolic
WP_080695199.1 MULTISPECIES: alpha-E domain-containing protein [Lysinibacillus]	+	-	adhesion of intra-epithelial T-lymphocytes to epithelial cell monolayers	Cytosolic
WP_082340366.1 MULTISPECIES: amidase family protein [Lysinibacillus]	+	-	Hydrolase activity	Cytosolic
WP_089984933.1 MULTISPECIES: Mur ligase family protein [Lysinibacillus]	+	-	additions of L-alanine, D-glutamate, meso-diaminopimelate	Cytosolic
WP_089986115.1 MULTISPECIES: tyrosine--tRNA ligase [Lysinibacillus]	+	-	connection between a specific amino acid and a nucleotide triplet anticodon embedded in the tRNA	Cytosolic
WP_090002593.1 MULTISPECIES: precorrin-4 C(11)-methyltransferase [Lysinibacillus]	+	-	Catalyzes the methylation of C-11 in cobalt-precorrin-4 to form cobalt-precorrin-5A	Cytosolic
WP_107921778.1 MULTISPECIES: riboflavin synthase [Lysinibacillus]	+	-	catalyzes the final reaction of riboflavin biosynthesis	Cytosolic
WP_107922665.1 MULTISPECIES: phBC6A51 family helix-turn-helix protein [Lysinibacillus]	+	-	Transcription regulation	Cytosolic
WP_112117412.1 MULTISPECIES: oligoendopeptidase F [Lysinibacillus]	+	-	Hydrolyzes peptides	Cytosolic
WP_115674134.1 MULTISPECIES: alanine--tRNA ligase [Lysinibacillus]	+	-	catalyzes the attachment of alanine to tRNA(Ala) in a two-step reaction	Cytosolic
WP_126659412.1 MULTISPECIES: riboflavin synthase [Lysinibacillus]	+	-	catalyzes the final reaction of riboflavin biosynthesis	Cytosolic
WP_131521218.1 MULTISPECIES: LysR family transcriptional regulator [Lysinibacillus]	+	-	Transcription regulation	Cytosolic
WP_139015328.1 MULTISPECIES: transposase [Lysinibacillus]	+	-	replicative transposition mechanism	Cytosolic
WP_150908020.1 MULTISPECIES: riboflavin biosynthesis protein RibF [Lysinibacillus]	+	-	catalyzes the phosphorylation of riboflavin into flavin mononucleotide (FMN)	Cytosolic
WP_158511880.1 MULTISPECIES: topoisomerase C-terminal repeat-containing protein [Lysinibacillus]	+	-	resolving supercoils and catenations in chromosomal DNA	Cytosolic
WP_206700857.1 MULTISPECIES: phosphoribosylformylglycinamidine cyclo-ligase [Lysinibacillus]	+	-	Purine biosynthesis	Cytosolic
WP_206700893.1 MULTISPECIES: UDP-N-acetylglucosamine 1-carboxyvinyltransferase [Lysinibacillus]	+	-	catalyzes the first committed step in peptidoglycan biosynthesis	Cytosolic
WP_206700916.1 MULTISPECIES: ribosome biogenesis GTPase YlqF [Lysinibacillus]	+	-	biogenesis of the 50S ribosomal subunit	Cytosolic
WP_206700942.1 MULTISPECIES: septum site-determining protein MinD [Lysinibacillus]	+	-	activation and regulation of MinC and MinE	Cytosolic
WP_206700954.1 MULTISPECIES: 50S ribosomal protein L11 methyltransferase [Lysinibacillus]	+	-	catalyzes the methylation of ribosomal protein L11	Cytosolic
WP_206701011.1 MULTISPECIES: LytTR family transcriptional regulator [Lysinibacillus]	+	-	transcription regulation	Cytosolic
WP_206701022.1 MULTISPECIES: sodium:proton antiporter [Lysinibacillus]	+	-	Transportation	membrane
WP_206701073.1 LytTR family DNA-binding domain-containing protein [Lysinibacillus fusiformis]	+	-	Response regulator	Cytosolic
WP_208704486.1 MULTISPECIES: CocE/NonD family hydrolase [Lysinibacillus]	+	-	dipeptidyl-peptidase activity	Cytosolic
WP_217580422.1 MULTISPECIES: phage head closure protein [Lysinibacillus]	+	-	unknown	Cytosolic
WP_217581165.1 MULTISPECIES: GrpB family protein [Lysinibacillus]	+	-	unknown	Cytosolic
WP_217581670.1 MULTISPECIES: PucR family transcriptional regulator ligand-binding domain-containing protein [Lysinibacillus]	+	-	transcription regulation	Cytosolic
WP_225341041.1 MULTISPECIES: formate dehydrogenase accessory sulfurtransferase FdhD [Lysinibacillus]	+	-	sulfur transferase activity	Cytosolic
WP_227256819.1 MULTISPECIES: N-acetylglucosamine-6-phosphate deacetylase [Lysinibacillus]	+	-	Catalyzes the hydrolysis of the N-acetyl group of N-acetylglucosamine-6-phosphate to yield glucosamine 6-phosphate and acetate	Cytosolic
WP_227256876.1 MULTISPECIES: KR domain-containing protein [Lysinibacillus]	+	-	catalyses the first step in the reductive modification of the beta-carbonyl centres in the growing polyketide chain	Cytosolic
WP_227256919.1 MULTISPECIES: alpha-amylase family glycosyl hydrolase [Lysinibacillus]	+	-	act on the α(1→4) glycosidic linkages in glycogen, starch, and related α-glucans	Cytosolic
WP_227256943.1 MULTISPECIES: recombinase family protein [Lysinibacillus]	+	-	DNA Repair	Cytosolic
WP_227665385.1 MULTISPECIES: HAMP domain-containing histidine kinase [Lysinibacillus]	+	-	signal transduction across the cellular membrane	membrane
WP_229389813.1 MULTISPECIES: glutamate-1-semialdehyde 2,1-aminomutase [Lysinibacillus]	+	-	catalyzes the isomerization of glutamate-1-semialdehyde (GSA) to 5-aminolevulinate (ALA)	Cytosolic
WP_231785613.1 MULTISPECIES: heme ABC transporter substrate-binding protein IsdE [Lysinibacillus]	+	-	Transportation	membrane
WP_004225827.1 MULTISPECIES: tRNA (adenosine(37)-N6)-dimethylallyltransferase MiaA [Lysinibacillus]	-	+	Protein synthesis	Cytosolic
WP_008180273.1 MULTISPECIES: RNA-binding S4 domain-containing protein [Lysinibacillus]	-	+	Transcription regulation	Cytosolic
WP_008181126.1 MULTISPECIES: Rrf2 family transcriptional regulator [Lysinibacillus]	-	+	Transcription regulation	Cytosolic
WP_008181678.1 MULTISPECIES: acyl carrier protein [Lysinibacillus]	-	+	Transportation	Cytosolic
WP_008181708.1 MULTISPECIES: 50S ribosomal protein L15 [Lysinibacillus]	-	+	Protein synthesis	Cytosolic
WP_008181911.1 MULTISPECIES: 30S ribosomal protein S19 [Lysinibacillus]	-	+	Protein synthesis	Cytosolic
WP_010857065.1 MULTISPECIES: twin-arginine translocase TatA/TatE family subunit [Lysinibacillus]	-	+	twin-arginine translocation	Cytosolic
WP_010858200.1 MULTISPECIES: aspartyl-phosphate phosphatase Spo0E family protein [Lysinibacillus]	-	+	the sporulation transcription factor	Cytosolic
WP_010859201.1 MULTISPECIES: cold-shock protein [Lysinibacillus]	-	+	multifunctional RNA/DNA binding proteins	Cytosolic
WP_010860598.1 MULTISPECIES: 50S ribosomal protein L29 [Lysinibacillus]	-	+	translation	Cytosolic
WP_010860599.1 MULTISPECIES: 50S ribosomal protein L16 [Lysinibacillus]	-	+	translation	Cytosolic
WP_012291646.1 MULTISPECIES: NYN domain-containing protein [Lysinibacillus]	-	+	gene expression regulation	Cytosolic
WP_012291834.1 MULTISPECIES: HD-GYP domain-containing protein [Lysinibacillus]	-	+	hydrolysis of the bacterial second messenger cyclic-di-GMP	Cytosolic
WP_012291841.1 MULTISPECIES: pyridoxal 5'-phosphate synthase lyase subunit PdxS [Lysinibacillus]	-	+	Catalyzes the formation of pyridoxal 5'-phosphate	Cytosolic
WP_012291866.1 MULTISPECIES: tRNA1(Val) (adenine(37)-N6)-methyltransferase [Lysinibacillus]	-	+	methylates the adenine	Cytosolic
WP_012291886.1 MULTISPECIES: stage V sporulation protein T [Lysinibacillus]	-	+	Transcriptional factor that regulates positively or negatively the expression of forespore-specific sigma G-dependent genes.	Cytosolic
WP_012291911.1 MULTISPECIES: alanine:cation symporter family protein [Lysinibacillus]	-	+	transportation	membrane
WP_012291914.1 MULTISPECIES: (2Fe-2S)-binding protein [Lysinibacillus]	-	+	oxidoreductase activity	Cytosolic
WP_012291947.1 MULTISPECIES: AAA family ATPase [Lysinibacillus]	-	+	ATP hydrolysis activity	Cytosolic
WP_012291955.1 MULTISPECIES: catalase [Lysinibacillus]	-	+	neutralization through decomposition of hydrogen peroxide	Cytosolic
WP_012291957.1 MULTISPECIES: ring-cleaving dioxygenase [Lysinibacillus]	-	+	catalyze the oxygenolytic fission of catecholic compounds	Cytosolic
WP_012291969.1 MULTISPECIES: endonuclease Q family protein [Lysinibacillus]	-	+	hydrolyzes the second phosphodiester bond 3′ from deoxyinosine in the DNA strand	Cytosolic
WP_012291991.1 MULTISPECIES: ammonia-dependent NAD(+) synthetase [Lysinibacillus]	-	+	converts nicotinic acid adenine dinucleotide to NAD+ via an adenylylated intermediate.	Cytosolic
WP_012292001.1 MULTISPECIES: glutamine-hydrolyzing GMP synthase [Lysinibacillus]	-	+	catalyzes the amination of xanthosine 5'-monophosphate to form GMP in the presence of glutamine and ATP	Cytosolic
WP_012292012.1 MULTISPECIES: phosphoribosylformylglycinamidine synthase subunit PurS [Lysinibacillus]	-	+	Catalyzes the ATP-dependent conversion of formylglycinamide ribonucleotide	Cytosolic
WP_012292036.1 MULTISPECIES: glycerol-3-phosphate dehydrogenase/oxidase [Lysinibacillus]	-	+	catalyzes the reversible redox conversion of dihydroxyacetone phosphate	Cytosolic
WP_012292039.1 MULTISPECIES: glycerol kinase GlpK [Lysinibacillus]	-	+	Catalyzes the phosphorylation of glycerol to yield sn-glycerol 3-phosphate	Cytosolic
WP_012292041.1 MULTISPECIES: serine protease [Lysinibacillus]	-	+	cleave peptide bonds in proteins	Cytosolic
WP_012292052.1 MULTISPECIES: sporulation protein YhbH [Lysinibacillus]	-	+	involved in a sporulation process	Cytosolic
WP_012292071.1 MULTISPECIES: amino acid racemase [Lysinibacillus]	-	+	catalyzes the chemical reaction an L-amino acid \rightleftharpoons a D-amino acid	Cytosolic
WP_012292114.1 MULTISPECIES: TerD family protein [Lysinibacillus]	-	+	involved in calcium homeostasis and participates in calcium regulation	Cytosolic
WP_012292141.1 MULTISPECIES: catalase [Lysinibacillus]	-	+	neutralization through decomposition of hydrogen peroxide	Cytosolic
WP_012292153.1 MULTISPECIES: YafY family transcriptional regulator [Lysinibacillus]	-	+	regulation of transcription	Cytosolic
WP_012292160.1 MULTISPECIES: DUF445 family protein [Lysinibacillus]	-	+	unknown	Cytosolic
WP_012292162.1 MULTISPECIES: ribonuclease H family protein [Lysinibacillus]	-	+	catalyze the cleavage of RNA in an RNA/DNA substrate	Cytosolic
WP_012292167.1 MULTISPECIES: glycerate kinase [Lysinibacillus]	-	+	fructose catabolic process to hydroxyacetone phosphate and glyceraldehyde-3-phosphate	Cytosolic
WP_012292203.1 MULTISPECIES: YhgE/Pip domain-containing protein [Lysinibacillus]	-	+	transcriptional activator	Cytosolic
WP_012292212.1 MULTISPECIES: fatty acid--CoA ligase family protein [Lysinibacillus]	-	+	activates the oxidation of complex fatty acids	Cytosolic
WP_012292213.1 MULTISPECIES: VTT domain-containing protein [Lysinibacillus]	-	+	integral membrane protein	membrane
WP_012292228.1 MULTISPECIES: bifunctional phosphoribosyl-AMP cyclohydrolase/phosphoribosyl-ATP diphosphatase HisIE [Lysinibacillus]	-	+	histidine biosynthetic process	Cytosolic
WP_012292232.1 MULTISPECIES: RNase adapter RapZ [Lysinibacillus]	-	+	cleave RNA	Cytosolic
WP_012292261.1 MULTISPECIES: site-specific integrase [Lysinibacillus]	-	+	genetic recombination	Cytosolic
WP_012292289.1 MULTISPECIES: GNAT family N-acetyltransferase [Lysinibacillus]	-	+	aminoglycoside antibiotic resistance, transcription regulation, protein acetylation and stress reaction	Cytosolic
WP_012292296.1 MULTISPECIES: S-layer homology domain-containing protein [Lysinibacillus]	-	+		Cytosolic
WP_012292298.1 MULTISPECIES: FAD-dependent oxidoreductase [Lysinibacillus]	-	+	Oxidation reduction reaction	Cytosolic
WP_012292398.1 MULTISPECIES: Glu/Leu/Phe/Val dehydrogenase [Lysinibacillus]	-	+	proton donor / acceptor	Cytosolic
WP_012292449.1 MULTISPECIES: gluconate 2-dehydrogenase subunit 3 family protein [Lysinibacillus]	-	+	catalyses the conversion of gluconate to 2-dehydro-D-gluconate	Cytosolic
WP_012292505.1 MULTISPECIES: Nramp family divalent metal transporter [Lysinibacillus]	-	+	transportation	Cytosolic
WP_012292541.1 MULTISPECIES: M20/M25/M40 family metallo-hydrolase [Lysinibacillus]	-	+	a divalent metal cation	Cytosolic
WP_012292578.1 MULTISPECIES: HAMP domain-containing histidine kinase [Lysinibacillus]	-	+	sensor and chemotaxis proteins	membrane
WP_012292590.1 MULTISPECIES: amidohydrolase [Lysinibacillus]	-	+	hydrolase that acts upon amide bonds.	Cytosolic
WP_012292612.1 MULTISPECIES: response regulator transcription factor [Lysinibacillus]	-	+	response regulator	Cytosolic
WP_012292636.1 MULTISPECIES: glycerophosphodiester phosphodiesterase [Lysinibacillus]	-	+	catalyzes the chemical reaction a glycerophosphodiester + H₂O \rightleftharpoons an alcohol + sn-glycerol 3-phosphate	Cytosolic
WP_012292663.1 MULTISPECIES: enoyl-CoA hydratase [Lysinibacillus]	-	+	hydrates the double bond between the 2nd and 3rd carbons on 2-trans/cis-enoyl-CoA metabolizing fatty acids in beta oxidation	Cytosolic
WP_012292664.1 MULTISPECIES: acyl-CoA carboxylase subunit beta [Lysinibacillus]	-	+	catalyzes the carboxylation of acetyl-CoA to malonyl-CoA	Cytosolic
WP_012292678.1 MULTISPECIES: pyridoxal phosphate-dependent aminotransferase [Lysinibacillus]	-	+	catalyze a wide variety of reaction types and usually have a conserved lysine residue in the active site for PLP binding	Cytosolic
WP_012292694.1 MULTISPECIES: bifunctional hydroxymethylpyrimidine kinase/phosphomethylpyrimidine kinase [Lysinibacillus]	-	+	biosynthesis of the essential cofactor thiamine pyrophosphate	Cytosolic
WP_012292706.1 MULTISPECIES: HD domain-containing protein [Lysinibacillus]	-	+	phosphohydrolase activity	Cytosolic
WP_012292728.1 MULTISPECIES: acyl-CoA dehydrogenase [Lysinibacillus]	-	+	f fatty acid β-oxidation	Cytosolic
WP_012292766.1 MULTISPECIES: F0F1 ATP synthase subunit alpha [Lysinibacillus]	-	+	ATP Synthesis	Cytosolic
WP_012292785.1 MULTISPECIES: flagellin [Lysinibacillus]	-	+	bacterial motility	membrane
WP_012292841.1 MULTISPECIES: tyrosine-type recombinase/integrase [Lysinibacillus]	-	+	rearrange DNA duplexes by means of conservative site-specific recombination reactions.	Cytosolic
WP_012292871.1 MULTISPECIES: NlpC/P60 family protein [Lysinibacillus]	-	+	bacterial cell wall hydrolases.	membrane
WP_012292877.1 MULTISPECIES: sigma 54-interacting transcriptional regulator [Lysinibacillus]	-	+	transcription regulation	Cytosolic
WP_012292891.1 MULTISPECIES: DUF3225 domain-containing protein [Lysinibacillus]	-	+	unknown	Cytosolic
WP_012292899.1 MULTISPECIES: flagellar hook-associated protein FlgL [Lysinibacillus]	-	+	motility	membrane
WP_012292910.1 MULTISPECIES: sulfatase-like hydrolase/transferase [Lysinibacillus]	-	+	transferase activity, transferring phosphorus-containing groups	Cytosolic
WP_012292915.1 MULTISPECIES: ribosome-associated translation inhibitor RaiA [Lysinibacillus]	-	+	regulate translation efficiency during transition	Cytosolic
WP_012292929.1 MULTISPECIES: S41 family peptidase [Lysinibacillus]	-	+	biosynthesis of the secondary metabolite ustiloxin B, an antimitotic tetrapeptide	Cytosolic
WP_012292935.1 MULTISPECIES: XRE family transcriptional regulator [Lysinibacillus]	-	+	transcriptional regulator	Cytosolic
WP_012293036.1 MULTISPECIES: RNA degradosome polyphosphate kinase [Lysinibacillus]	-	+	RNA degradation	Cytosolic
WP_012293037.1 MULTISPECIES: bifunctional diguanylate cyclase/phosphodiesterase [Lysinibacillus]	-	+	synthesize cyclic-diGMP	Cytosolic
WP_012293044.1 MULTISPECIES: 2,4-dienoyl-CoA reductase [Lysinibacillus]	-	+	catalyzes the following reactions DECR1 participates in the beta oxidation and metabolism of polyunsaturated fatty enoyl-CoA esters	Cytosolic
WP_012293124.1 MULTISPECIES: heme o synthase [Lysinibacillus]	-	+	catalyzes the electron transfer from reduced cytochrome c to oxygen	Cytosolic
WP_012293131.1 MULTISPECIES: YugN family protein [Lysinibacillus]	-	+	transcriptional activator	Cytosolic
WP_012293134.1 MULTISPECIES: PaaI family thioesterase [Lysinibacillus]	-	+	catalyze the hydrolysis of thioester bonds	Cytosolic
WP_012293212.1 MULTISPECIES: Stk1 family PASTA domain-containing Ser/Thr kinase [Lysinibacillus]	-	+	kinase activation	Cytosolic
WP_012293236.1 MULTISPECIES: 3-oxoacyl-[acyl-carrier-protein] reductase [Lysinibacillus]	-	+	catalyzes the 3-oxoacyl-ACP reduction step in the fatty acid synthesis pathway	Cytosolic
WP_012293240.1 MULTISPECIES: chromosome segregation protein SMC [Lysinibacillus]	-	+	DNA recombination repair	Cytosolic
WP_012293281.1 MULTISPECIES: MinD/ParA family protein [Lysinibacillus]	-	+	regulates its affinity for a surface	Cytosolic
WP_012293303.1 MULTISPECIES: YlxR family protein [Lysinibacillus]	-	+	Regulates Metabolic Gene Expression	Cytosolic
WP_012293305.1 MULTISPECIES: 30S ribosome-binding factor RbfA [Lysinibacillus]	-	+	translational	Cytosolic
WP_012293318.1 MULTISPECIES: ribonuclease J [Lysinibacillus]	-	+	cleave RNA	Cytosolic
WP_012293336.1 MULTISPECIES: CpsD/CapB family tyrosine-protein kinase [Lysinibacillus]	-	+	capsule polysaccharide biosynthesis	Cytosolic
WP_012293355.1 MULTISPECIES: outer spore coat protein CotE [Lysinibacillus]	-	+	spore synthesis	Cytosolic
WP_012293380.1 MULTISPECIES: DUF2339 domain-containing protein [Lysinibacillus]	-	+	unknown	Cytosolic
WP_012293388.1 MULTISPECIES: DUF896 domain-containing protein [Lysinibacillus]	-	+	unknown	Cytosolic
WP_012293408.1 MULTISPECIES: thymidine phosphorylase [Lysinibacillus]	-	+	catalyzes the reversible phosphorylation of thymidine	Cytosolic
WP_012293418.1 MULTISPECIES: rRNA pseudouridine synthase [Lysinibacillus]	-	+	pseudouridine synthase RsuA catalyzes formation of pseudouridine	Cytosolic
WP_012293444.1 MULTISPECIES: GTP cyclohydrolase II [Lysinibacillus]	-	+	atalyzes the chemical reaction GTP + 3 H₂O \rightleftharpoons formate + 2,5-diamino-6-hydroxy-4-pyrimidine + diphosphate	Cytosolic
WP_012293446.1 MULTISPECIES: FAD-dependent monooxygenase [Lysinibacillus]	-	+	amino acid metabolism, mineralization of aromatic compounds, and biosynthesis of secondary metabolites	Cytosolic
WP_012293496.1 MULTISPECIES: ABC transporter ATP-binding protein [Lysinibacillus]	-	+	transportation	membrane
WP_012293510.1 MULTISPECIES: 2,3-butanediol dehydrogenase [Lysinibacillus]	-	+	Oxidoreductase family	Cytosolic
WP_012293541.1 MULTISPECIES: S-layer homology domain-containing protein [Lysinibacillus]	-	+	display extracellular proteins such as enzymes, outer membrane proteins, and surface layer (glyco) proteins on the bacterial cell surface	membrane
WP_012293545.1 MULTISPECIES: arginase [Lysinibacillus]	-	+	manganese-containing enzyme	Cytosolic
WP_012293597.1 MULTISPECIES: YpdA family putative bacillithiol disulfide reductase [Lysinibacillus]	-	+	influences intracellular BSSB levels and decreases the BSH/BSSB redox ratio	Cytosolic
WP_012293634.1 MULTISPECIES: phage holin family protein [Lysinibacillus]	-	+	form pores in the host's cell membrane	membrane
WP_012293641.1 MULTISPECIES: long-chain fatty acid--CoA ligase [Lysinibacillus]	-	+	activates the oxidation of complex fatty acids	Cytosolic
WP_012293643.1 MULTISPECIES: chorismate synthase [Lysinibacillus]	-	+	shikimate pathway leading to aromatic compounds such as the aromatic amino acids	Cytosolic
WP_012293644.1 MULTISPECIES: 3-dehydroquinate synthase [Lysinibacillus]	-	+	production of aromatic amino acids	Cytosolic
WP_012293670.1 MULTISPECIES: ATP-dependent DNA helicase DinG [Lysinibacillus]	-	+	DNA-dependent ATPase and 5'-3' DNA helicase	Cytosolic
WP_012293714.1 MULTISPECIES: spore germination protein [Lysinibacillus]	-	+	spore germination via their interaction with germinant receptors	Cytosolic
WP_012293736.1 MULTISPECIES: MFS transporter [Lysinibacillus]	-	+	transportation	Membrane
WP_012293743.1 MULTISPECIES: endonuclease III [Lysinibacillus]	-	+	cleave nucleotides	Cytosolic
WP_012293782.1 MULTISPECIES: IclR family transcriptional regulator [Lysinibacillus]	-	+	Transcription regulation	Cytosolic
WP_012293788.1 MULTISPECIES: 5-oxoprolinase subunit PxpB [Lysinibacillus]	-	+	Catalyzes the cleavage of 5-oxoproline to form L-glutamate coupled to the hydrolysis of ATP	Cytosolic
WP_012293789.1 MULTISPECIES: biotin-dependent carboxyltransferase family protein [Lysinibacillus]	-	+	Biotin-dependent carboxylases include acetyl-CoA carboxylase	Cytosolic
WP_012293798.1 MULTISPECIES: response regulator transcription factor [Lysinibacillus]	-	+	transcription regulation	Cytosolic
WP_012293852.1 MULTISPECIES: heparan-alpha-glucosaminide N-acetyltransferase domain-containing protein [Lysinibacillus]	-	+	acetylates the non-reducing terminal alpha-glucosamine residue of intralysosomal heparin	Cytosolic
WP_012293885.1 MULTISPECIES: glutamate 5-kinase [Lysinibacillus]	-	+	Catalyzes the transfer of a phosphate group to glutamate to form L-glutamate 5-phosphate	Cytosolic
WP_012293911.1 MULTISPECIES: LutB/LldF family L-lactate oxidation iron-sulfur protein [Lysinibacillus]	-	+		Cytosolic
WP_012293926.1 MULTISPECIES: methyl-accepting chemotaxis protein [Lysinibacillus]	-	+	reversible methylation during adaptation	integral membrane
WP_012293927.1 MULTISPECIES: methyl-accepting chemotaxis protein [Lysinibacillus]	-	+	reversible methylation during adaptation	integral membrane
WP_012293959.1 MULTISPECIES: VOC family protein [Lysinibacillus]	-	+	aromatic compound catabolic process	Cytosolic
WP_012293972.1 MULTISPECIES: ABC transporter ATP-binding protein [Lysinibacillus]	-	+	transportation	membrane
WP_012293986.1 MULTISPECIES: hydantoinase/oxoprolinase family protein [Lysinibacillus]	-	+	catalyses the formation of L-glutamate from 5-oxo-L-proline	Cytosolic
WP_012294060.1 MULTISPECIES: Ger(x)C family spore germination protein [Lysinibacillus]	-	+	spore germination via their interaction with germinant receptors	Cytosolic
WP_012294072.1 MULTISPECIES: beta-N-acetylhexosaminidase [Lysinibacillus]	-	+	hydrolysis of terminal N-acetyl-D-hexosamine residues in N-acetyl-β-D-hexosaminides	Cytosolic
WP_012294167.1 MULTISPECIES: DinB family protein [Lysinibacillus]	-	+	nucleases involved in the cleaning up of DNA damaged	Cytosolic
WP_012294185.1 MULTISPECIES: DUF6366 family protein [Lysinibacillus]	-	+	unknown	Cytosolic
WP_012294190.1 MULTISPECIES: nucleotidyl transferase AbiEii/AbiGii toxin family protein [Lysinibacillus]	-	+	Transferase activity	Cytosolic
WP_012294202.1 MULTISPECIES: MarR family winged helix-turn-helix transcriptional regulator [Lysinibacillus]	-	+	transcription regulation	Cytosolic
WP_012294204.1 MULTISPECIES: MarR family transcriptional regulator [Lysinibacillus]	-	+	transcription regulation	Cytosolic
WP_012294232.1 MULTISPECIES: GerAB/ArcD/ProY family transporter [Lysinibacillus]	-	+	transportation	membrane
WP_012294785.1 MULTISPECIES: VanZ family protein [Lysinibacillus]	-	+	protect bacteria from lipoglycopeptide antibiotics by affecting their binding to the cell surface	membrane
WP_012295121.1 MULTISPECIES: C39 family peptidase [Lysinibacillus]	-	+	cleave the 'double-glycine' leader peptides	Cytosolic
WP_012295145.1 MULTISPECIES: protein phosphatase 2C domain-containing protein [Lysinibacillus]	-	+	catalyzes dephosphorylation and concomitant reactivation of the pyruvate dehydrogenase complex.	Cytosolic
WP_012295184.1 MULTISPECIES: superoxide dismutase [Lysinibacillus]	-	+	catalyzes the dismutation of the superoxide radical into ordinary molecular oxygen and hydrogen peroxide	Cytosolic
WP_012295204.1 MULTISPECIES: cellulose biosynthesis cyclic di-GMP-binding regulatory protein BcsB [Lysinibacillus]	-	+	cellulose biosynthetic process	membrane
WP_012295216.1 MULTISPECIES: deoxyribonuclease IV [Lysinibacillus]	-	+	cleave nucleotides	Cytosolic
WP_012295225.1 MULTISPECIES: 4-hydroxy-3-methylbut-2-enyl diphosphate reductase [Lysinibacillus]	-	+	a member of the NADP/NAD-dependent oxidoreductase	Cytosolic
WP_012295240.1 MULTISPECIES: cytochrome c [Lysinibacillus]	-	+	cell apoptosis.	mitochondrial inner membrane
WP_012295290.1 MULTISPECIES: phage tail protein [Lysinibacillus]	-	+	specific recognition of bacterial surfaces	membrane
WP_012295328.1 nucleotide exchange factor GrpE [Lysinibacillus fusiformis]	-	+	regulation of protein folding machinery, as well as the heat shock response	Cytosolic
WP_012295333.1 MULTISPECIES: oligoribonuclease [Lysinibacillus]	-	+	cleave nucleotides	Cytosolic
WP_012295451.1 MULTISPECIES: Holliday junction branch migration protein RuvA [Lysinibacillus]	-	+	DNA Repair	Cytosolic
WP_012295454.1 MULTISPECIES: transcription repressor NadR [Lysinibacillus]	-	+	transcription regulation	Cytosolic
WP_012295471.1 MULTISPECIES: Maf family protein [Lysinibacillus]	-	+	transcriptional activator or repressor.	Cytosolic
WP_012295472.1 MULTISPECIES: hypothetical protein [Lysinibacillus]	-	+		Cytosolic
WP_012295519.1 MULTISPECIES: accessory gene regulator AgrB [Lysinibacillus]	-	+	regulatory	Cytosolic
WP_012295562.1 MULTISPECIES: succinate dehydrogenase flavoprotein subunit [Lysinibacillus]	-	+	catalytic subunit of succinate-ubiquinone oxidoreductase, a complex of the mitochondrial respiratory chain.	Cytosolic
WP_012295564.1 MULTISPECIES: YslB family protein [Lysinibacillus]	-	+	unknown	Cytosolic
WP_012295575.1 MULTISPECIES: cell division protein ZapA [Lysinibacillus]	-	+	cell division	Cytosolic
WP_012295582.1 MULTISPECIES: sensor domain-containing diguanylate cyclase [Lysinibacillus]	-	+	sensory protein	membrane
WP_012295599.1 MULTISPECIES: thiol-activated cytolysin family protein [Lysinibacillus]	-	+	cholestrol binding protein	membrane
WP_012295621.1 MULTISPECIES: FxsA family protein [Lysinibacillus]	-	+	cytoplasmic membrane protein	membrane
WP_012295715.1 MULTISPECIES: asparagine synthase (glutamine-hydrolyzing) [Lysinibacillus]	-	+	synthesis of asparagine	Cytosolic
WP_012295764.1 MULTISPECIES: 2-succinyl-5-enolpyruvyl-6-hydroxy-3-cyclohexene-1-carboxylic-acid synthase [Lysinibacillus]	-	+	catalyzes the second step of menaquinone biosynthesis	Cytosolic
WP_012295770.1 MULTISPECIES: TraR/DksA C4-type zinc finger protein [Lysinibacillus]	-	+	zinc ion binding	Cytosolic
WP_012295775.1 MULTISPECIES: cysteine desulfurase [Lysinibacillus]	-	+	amino acid synthesis regulation	Cytosolic
WP_012295807.1 MULTISPECIES: succinate CoA transferase [Lysinibacillus]	-	+	transferase enzyme activity	Cytosolic
WP_012295810.1 MULTISPECIES: DUF1002 domain-containing protein [Lysinibacillus]	-	+	unknown	Cytosolic
WP_012295819.1 MULTISPECIES: DUF2500 domain-containing protein [Lysinibacillus]	-	+	receptor protein	Cytosolic
WP_012295824.1 MULTISPECIES: manganese-dependent inorganic pyrophosphatase [Lysinibacillus]	-	+	catalytic activity	Cytosolic
WP_012295840.1 MULTISPECIES: siderophore ABC transporter substrate-binding protein [Lysinibacillus]	-	+	transportation	membrane
WP_012295862.1 MULTISPECIES: methyl-accepting chemotaxis protein [Lysinibacillus]	-	+	reversible methylation during adaptation	integral membrane
WP_012295887.1 MULTISPECIES: rhodanese-like domain-containing protein [Lysinibacillus]	-	+	anchoring ferredoxin--NADP reductase to the thylakoid membranes and sustaining efficient linear electron flow	Cytosolic
WP_012295891.1 MULTISPECIES: Rrf2 family transcriptional regulator [Lysinibacillus]	-	+	transcription regulation	Cytosolic
WP_012295892.1 MULTISPECIES: GNAT family N-acetyltransferase [Lysinibacillus]	-	+	catalyze the transfer of the acetyl from the CoA donor to a primary amine of the acceptor	Cytosolic
WP_012295916.1 MULTISPECIES: BCCT family transporter [Lysinibacillus]	-	+	transportation	membrane
WP_012295923.1 MULTISPECIES: DinB family protein [Lysinibacillus]	-	+	nucleases involved in the cleaning up of DNA damaged	Cytosolic
WP_012295978.1 MULTISPECIES: AI-2E family transporter [Lysinibacillus]	-	+	tnasportation	membrane
WP_012295996.1 MULTISPECIES: PLP-dependent aminotransferase family protein [Lysinibacillus]	-	+	involved in metabolic pathways like amino acid biosynthesis and degradation, biosynthesis of antibacterial compounds	Cytosolic
WP_012296018.1 MULTISPECIES: response regulator transcription factor [Lysinibacillus]	-	+	regulatory	Cytosolic
WP_012296048.1 MULTISPECIES: energy-coupling factor transporter transmembrane protein EcfT [Lysinibacillus]	-	+	transport molecules	Cytosolic
WP_012296108.1 MULTISPECIES: 23S rRNA pseudouridine(2604) synthase RluF [Lysinibacillus]	-	+	important for RNA recognition	Cytosolic
WP_012296123.1 MULTISPECIES: RNA ligase family protein [Lysinibacillus]	-	+	repair, splicing, and editing pathways that either reseal broken RNAs or alter their primary structure	Cytosolic
WP_012296168.1 MULTISPECIES: peptidylprolyl isomerase [Lysinibacillus]	-	+	catalytic function is to facilitate the cis–trans isomerisation of peptide bonds within polypeptide chains	Cytosolic
WP_012296174.1 MULTISPECIES: MBL fold metallo-hydrolase [Lysinibacillus]	-	+	hydrolytic enzymes	Cytosolic
WP_012296211.1 MULTISPECIES: 30S ribosomal protein S18 [Lysinibacillus]	-	+	translation	Cytosolic
WP_016992305.1 MULTISPECIES: 23S rRNA (pseudouridine(1915)-N(3))-methyltransferase RlmH [Lysinibacillus]	-	+	methylates 23S ribosomal RNA pseudouridine	Cytosolic
WP_016994084.1 MULTISPECIES: type I DNA topoisomerase [Lysinibacillus]	-	+	remove dna supercoiling	Cytosolic
WP_024363854.1 MULTISPECIES: ribonuclease HIII [Lysinibacillus]	-	+	cleave nucleotides mismatch repair	Cytosolic
WP_024363933.1 MULTISPECIES: co-chaperone GroES [Lysinibacillus]	-	+	protein folding	Cytosolic
WP_025114538.1 MULTISPECIES: MarR family transcriptional regulator [Lysinibacillus]	-	+	transcription regulation	Cytosolic
WP_025116632.1 MULTISPECIES: glycine cleavage system protein GcvH [Lysinibacillus]	-	+	catalyzes the degradation of glycine	Cytosolic
WP_025218805.1 MULTISPECIES: 1-deoxy-D-xylulose-5-phosphate reductoisomerase [Lysinibacillus]	-	+	synthesizes isopentenyl diphosphate	Cytosolic
WP_025219450.1 MULTISPECIES: transcriptional regulator YeiL [Lysinibacillus]	-	+	transcription regulation	Cytosolic
WP_031415994.1 MULTISPECIES: sugar phosphate isomerase/epimerase [Lysinibacillus]	-	+	participates in glycolysis / gluconeogenesis.	Cytosolic
WP_031416242.1 MULTISPECIES: acetolactate synthase small subunit [Lysinibacillus]	-	+	L-isoleucine biosynthesis L-valine biosynthesis	Cytosolic
WP_031416319.1 MULTISPECIES: tRNA (adenosine(37)-N6)-threonylcarbamoyltransferase complex dimerization subunit type 1 TsaB [Lysinibacillus]	-	+	translation regulatory	Cytosolic
WP_031416415.1 MULTISPECIES: FAD-binding protein [Lysinibacillus]	-	+	catalyze isoalloxazine ring	Cytosolic
WP_031416445.1 MULTISPECIES: IclR family transcriptional regulator [Lysinibacillus]	-	+	transcription regulation	Cytosolic
WP_031416547.1 MULTISPECIES: M20 peptidase aminoacylase family protein [Lysinibacillus]	-	+	catalyze the hydrolysis of an N-acetyl group from N-α-acyl amino acids	Cytosolic
WP_031416726.1 MULTISPECIES: class I SAM-dependent methyltransferase [Lysinibacillus]	-	+	utilizes the methyl donor S-adenosyl-L-methionine (SAM) as a cofactor to methylate proteins, small molecules, lipids and nucleic acids	Cytosolic
WP_031416778.1 MULTISPECIES: nucleotidyltransferase domain-containing protein [Lysinibacillus]	-	+	responsible for the synthesis of the bulk of cellular RNA	Cytosolic
WP_031416868.1 MULTISPECIES: fumarate hydratase [Lysinibacillus]	-	+	allows cells to use oxygen and generate energy.	Cytosolic
WP_031416899.1 MULTISPECIES: glutamate-1-semialdehyde 2,1-aminomutase [Lysinibacillus]	-	+	catalyzes the isomerization of glutamate-1-semialdehyde (GSA) to 5-aminolevulinate	Cytosolic
WP_031417025.1 MULTISPECIES: HD domain-containing protein [Lysinibacillus]	-	+	phosphohydrolase activity	Cytosolic
WP_031417454.1 MULTISPECIES: adenosylmethionine--8-amino-7-oxononanoate transaminase [Lysinibacillus]	-	+	Biotin biosynthesis	Cytosolic
WP_031417705.1 MULTISPECIES: Fe-S cluster assembly protein SufB [Lysinibacillus]	-	+	assembly or repair of oxygen-labile iron-sulfur clusters under oxidative stress.	Cytosolic
WP_031417788.1 MULTISPECIES: type I glyceraldehyde-3-phosphate dehydrogenase [Lysinibacillus]	-	+	catalyzes the sixth step of glycolysis	Cytosolic
WP_031417798.1 MULTISPECIES: tetratricopeptide repeat protein [Lysinibacillus]	-	+	intraflagellar transport	Cytosolic
WP_031417807.1 MULTISPECIES: HPr(Ser) kinase/phosphatase [Lysinibacillus]	-	+	Catalyzes the ATP- as well as the pyrophosphate-dependent phosphorylation of 'Ser-45' in HPr	Cytosolic
WP_031417850.1 MULTISPECIES: TetR/AcrR family transcriptional regulator [Lysinibacillus]	-	+	transcription regulation	Cytosolic
WP_031417935.1 MULTISPECIES: MmcQ/YjbR family DNA-binding protein [Lysinibacillus]	-	+	DNA binding transcription factor	Cytosolic
WP_031417990.1 MULTISPECIES: 4-hydroxy-tetrahydrodipicolinate reductase [Lysinibacillus]	-	+	catalyzes the chemical reaction -2,3,4,5-tetrahydropyridine-2,6-dicarboxylate + NAD⁺ + H₂O	Cytosolic
WP_031418133.1 MULTISPECIES: nicotinate-nucleotide adenylyltransferase [Lysinibacillus]	-	+	Catalyzes the reversible adenylation of nicotinate mononucleotide (NaMN) to (NaAD)	Cytosolic
WP_031418171.1 MULTISPECIES: S41 family peptidase [Lysinibacillus]	-	+	cleave peptide bonds	Cytosolic
WP_031418189.1 MULTISPECIES: transporter substrate-binding domain-containing protein [Lysinibacillus]	-	+	transportation of molecules	membrane
WP_031418337.1 MULTISPECIES: LysE family translocator [Lysinibacillus]	-	+	catalyze export of amino acids, lipids and heavy metal ions	Cytosolic
WP_031418848.1 MULTISPECIES: dicarboxylate/amino acid:cation symporter [Lysinibacillus]	-	+	type of symporter (transportation)	membrane
WP_031418899.1 MULTISPECIES: UDP-N-acetylmuramoyl-L-alanyl-D-glutamate--2,6-diaminopimelate ligase [Lysinibacillus]	-	+	catalyzes a reaction in the cytoplasmic step of peptidoglycan biosynthesis	Cytosolic
WP_031419221.1 MULTISPECIES: DNA polymerase III subunit delta [Lysinibacillus]	-	+	DNA Replication	Cytosolic
WP_031419266.1 MULTISPECIES: SIS domain-containing protein [Lysinibacillus]	-	+	phosphosugar metabolism	Cytosolic
WP_031419288.1 MULTISPECIES: DUF421 domain-containing protein [Lysinibacillus]	-	+	unknown	Cytosolic
WP_031419385.1 MULTISPECIES: AMP-binding protein [Lysinibacillus]	-	+	biosynthesis of penicillin and cephalosporin	Cytosolic
WP_031419593.1 MULTISPECIES: sulfite exporter TauE/SafE family protein [Lysinibacillus]	-	+	protein ubiquitination	Cytosolic
WP_031419728.1 MULTISPECIES: phosphoenolpyruvate--protein phosphotransferase [Lysinibacillus]	-	+	catalyzes the chemical reaction phosphoenolpyruvate + protein histidine	Cytosolic
WP_031419862.1 MULTISPECIES: methyl-accepting chemotaxis protein [Lysinibacillus]	-	+	reversible methylation for adaptation	membrane
WP_036074957.1 MULTISPECIES: SecY-interacting protein Syd [Lysinibacillus]	-	+	transport of polypeptides across the bacterial inner membrane	membrane
WP_036121394.1 MULTISPECIES: translation initiation factor IF-2 [Lysinibacillus]	-	+	Translation factor	Cytosolic
WP_036128254.1 MULTISPECIES: cell division protein ZapA [Lysinibacillus]	-	+	cell division	Cytosolic
WP_036160348.1 MULTISPECIES: TatD family hydrolase [Lysinibacillus]	-	+	deoxyribonuclease activity	Cytosolic
WP_036160366.1 MULTISPECIES: aldehyde dehydrogenase family protein [Lysinibacillus]	-	+	encodes enzymes that are critical for certain life processes and detoxification via the NAD(P)+-dependent oxidation	Cytosolic
WP_036160581.1 MULTISPECIES: LytTR family transcriptional regulator [Lysinibacillus]	-	+	regulation of transcription	Cytosolic
WP_036160584.1 MULTISPECIES: DUF5050 domain-containing protein [Lysinibacillus]	-	+	unknown	Cytosolic
WP_036160615.1 MULTISPECIES: HAMP domain-containing histidine kinase [Lysinibacillus]	-	+	Adenylate cyclases	Cytosolic
WP_036160622.1 MULTISPECIES: APC family permease [Lysinibacillus]	-	+	permease	Cytosolic
WP_036160701.1 MULTISPECIES: AAA domain-containing protein [Lysinibacillus]	-	+	binds and hydrolyzes nucleotides	Cytosolic
WP_036160943.1 MULTISPECIES: aspartate carbamoyltransferase catalytic subunit [Lysinibacillus]	-	+	UMP biosynthesis via de novo pathway, Pyrimidine metabolism	Cytosolic
WP_036160980.1 MULTISPECIES: glycerol-3-phosphate dehydrogenase/oxidase [Lysinibacillus]	-	+	catalyzes the reversible redox conversion of dihydroxyacetone phosphate to sn-glycerol 3-phosphate	Cytosolic
WP_036161060.1 MULTISPECIES: aldehyde dehydrogenase family protein [Lysinibacillus]	-	+	enzymic detoxification	Cytosolic
WP_036161090.1 MULTISPECIES: YwhD family protein [Lysinibacillus]	-	+	unknown	membrane
WP_036161113.1 MULTISPECIES: BMP family ABC transporter substrate-binding protein [Lysinibacillus]	-	+	transportation	membrane
WP_036161116.1 MULTISPECIES: PTS sugar transporter subunit IIA [Lysinibacillus]	-	+	transportation	membrane
WP_036161220.1 MULTISPECIES: asparagine--tRNA ligase [Lysinibacillus]	-	+	ligase enzyme	Cytosolic
WP_036161240.1 MULTISPECIES: AraC family transcriptional regulator [Lysinibacillus]	-	+	transcription regulation	Cytosolic
WP_036161419.1 MULTISPECIES: isochorismatase family protein [Lysinibacillus]	-	+	hydrolase activity	Cytosolic
WP_036161480.1 MULTISPECIES: TetR/AcrR family transcriptional regulator [Lysinibacillus]	-	+	transcription regulation	Cytosolic
WP_036161500.1 MULTISPECIES: NUDIX pyrophosphatase [Lysinibacillus]	-	+	catalyzes the hydrolysis of ADP-ribose to ribose-5-P and AMP	Cytosolic
WP_036161519.1 MULTISPECIES: aspartate aminotransferase family protein [Lysinibacillus]	-	+	catalyzes the reversible transfer of an α-amino group between aspartate and glutamate	Cytosolic
WP_036161592.1 MULTISPECIES: GNAT family N-acetyltransferase [Lysinibacillus]	-	+	catalyzes the reversible transfer of an α-amino group between aspartate and glutamate	Cytosolic
WP_036161631.1 MULTISPECIES: DUF1232 domain-containing protein [Lysinibacillus]	-	+	unknown	Cytosolic
WP_036161644.1 MULTISPECIES: LytTR family transcriptional regulator [Lysinibacillus]	-	+	Regulation of transcription	Cytosolic
WP_036161675.1 MULTISPECIES: proline--tRNA ligase [Lysinibacillus]	-	+	trna ligase	Cytosolic
WP_036161751.1 MULTISPECIES: 5-methyltetrahydropteroyltriglutamate--homocysteine S-methyltransferase [Lysinibacillus]	-	+	catalyzes the chemical reaction 5-methyltetrahydropteroyltri-L-glutamate + L-homocysteine	Cytosolic
WP_036161804.1 MULTISPECIES: aconitate hydratase AcnA [Lysinibacillus]	-	+	Catalyzes the reversible isomerization of citrate to isocitrate via cis-aconitate	Cytosolic
WP_036161876.1 MULTISPECIES: DNA alkylation repair protein [Lysinibacillus]	-	+	repair system	Cytosolic
WP_036161906.1 MULTISPECIES: Rrf2 family transcriptional regulator [Lysinibacillus]	-	+	transcription regulation	Cytosolic
WP_036161912.1 MULTISPECIES: MerR family transcriptional regulator [Lysinibacillus]	-	+	transcription regulation	Cytosolic
WP_036162009.1 MULTISPECIES: HAMP domain-containing histidine kinase [Lysinibacillus]	-	+	bacterial sensor and chemotaxis proteins	membrane
WP_036162024.1 MULTISPECIES: iron-containing alcohol dehydrogenase [Lysinibacillus]	-	+	the metabolism of fucose	Cytosolic
WP_036162141.1 MULTISPECIES: potassium-transporting ATPase subunit KdpA [Lysinibacillus]	-	+	transportation	membrane
WP_036162144.1 MULTISPECIES: 4-hydroxy-3-methylbut-2-enyl diphosphate reductase [Lysinibacillus]	-	+	catalyzes the last step of the methylerythritol phosphate pathway	Cytosolic
WP_036162193.1 MULTISPECIES: tRNA (N(6)-L-threonylcarbamoyladenosine(37)-C(2))-methylthiotransferase MtaB [Lysinibacillus]	-	+	transferase activity	Cytosolic
WP_036162221.1 MULTISPECIES: ATP-dependent RecD-like DNA helicase [Lysinibacillus]	-	+	separate double-stranded DNA into single strands allowing each strand to be copied	Cytosolic
WP_036162247.1 MULTISPECIES: GTPase ObgE [Lysinibacillus]	-	+	guanosine nucleotide exchange	Cytosolic
WP_036162264.1 MULTISPECIES: PQQ-dependent sugar dehydrogenase [Lysinibacillus]	-	+	catalyzes the chemical reaction D-glucose + ubiquinone \rightleftharpoons D-glucono-1,5-lactone + ubiquinol	Cytosolic
WP_036162343.1 MULTISPECIES: amidohydrolase family protein [Lysinibacillus]	-	+	a type of hydrolase that acts upon amide bonds	Cytosolic
WP_036162363.1 MULTISPECIES: bifunctional 2',3'-cyclic-nucleotide 2'-phosphodiesterase/3'-nucleotidase [Lysinibacillus]	-	+	catalyzes two consecutive reactions during ribonucleic acid degradation	Cytosolic
WP_036162408.1 MULTISPECIES: DUF2238 domain-containing protein [Lysinibacillus]	-	+	unknown	Cytosolic
WP_036162469.1 MULTISPECIES: gluconokinase [Lysinibacillus]	-	+	catalyzes the chemical reaction ATP + D-gluconate \rightleftharpoons ADP + 6-phospho-D-gluconate	Cytosolic
WP_036162489.1 MULTISPECIES: cell wall metabolism sensor histidine kinase WalK [Lysinibacillus]	-	+	sensory protein	membrane
WP_036162495.1 MULTISPECIES: D-alanyl-D-alanine carboxypeptidase [Lysinibacillus]	-	+	peptidoglycan (PG) synthesis and remodelling	Cytosolic
WP_036162500.1 MULTISPECIES: tRNA adenosine(34) deaminase TadA [Lysinibacillus]	-	+	Translation	Cytosolic
WP_036162548.1 MULTISPECIES: xanthine phosphoribosyltransferase [Lysinibacillus]	-	+	the generation of purine nucleotides through the purine salvage pathway	Cytosolic
WP_036162559.1 MULTISPECIES: DNA topoisomerase III [Lysinibacillus]	-	+	remove supercoiling	Cytosolic
WP_036162599.1 MULTISPECIES: fibronectin-binding domain-containing protein [Lysinibacillus]	-	+	unknown	membrane
WP_036162813.1 MULTISPECIES: N-acyl homoserine lactonase family protein [Lysinibacillus]	-	+	degrading signal molecules involved in bacterial quorum sensing	Cytosolic
WP_036162950.1 MULTISPECIES: response regulator transcription factor [Lysinibacillus]	-	+	transcription regulation	Cytosolic
WP_036220157.1 MULTISPECIES: tail fiber protein [Lysinibacillus]	-	+	responsible for the specific, albeit reversible primary attachment to host cell	membrane
WP_036220980.1 MULTISPECIES: ABC transporter permease [Lysinibacillus]	-	+	transportation	membrane
WP_036221298.1 MULTISPECIES: DUF1510 family protein [Lysinibacillus]	-	+	unknown	Cytosolic
WP_036221872.1 MULTISPECIES: RNA-splicing ligase RtcB [Lysinibacillus]	-	+	post transcriptional regulatory protein	Cytosolic
WP_036222500.1 MULTISPECIES: methyl-accepting chemotaxis protein [Lysinibacillus]	-	+	reversible methylation for adaptation	membrane
WP_036223767.1 MULTISPECIES: cardiolipin synthase [Lysinibacillus]	-	+	Catalyzes the synthesis of cardiolipin (CL) (diphosphatidylglycerol)	Cytosolic
WP_036224392.1 MULTISPECIES: hydroxymethylglutaryl-CoA reductase, degradative [Lysinibacillus]	-	+	degradation of the ER enzyme 3-hydroxy-3-methylglutaryl CoA reductase	Cytosolic
WP_036225348.1 MULTISPECIES: phosphate propanoyltransferase [Lysinibacillus]	-	+	catalyzing the conversion of propanoyl-CoA to propanoyl-phosphate	Cytosolic
WP_036226253.1 MULTISPECIES: extracellular solute-binding protein [Lysinibacillus]	-	+	chemotaxis, transmembrane transport, and facilitating sensory transduction pathways	membrane
WP_038509878.1 MULTISPECIES: DnaD domain protein [Lysinibacillus]	-	+	to recruit the replication fork helicase onto the DNA	Cytosolic
WP_048391937.1 MULTISPECIES: extracellular solute-binding protein [Lysinibacillus]	-	+	chemotaxis, transmembrane transport, and facilitating sensory transduction pathways	membrane
