# Supplementary material for: What transcriptomics and proteomics can tell us about a high borate perturbed boron tolerant Bacilli strain
Source: Royal Society of Chemistry journal article supplement (doi:10.1039/d3mo00023k), 2023-04-04
Supplement: d3mo00023k2.xlsx [file d3mo00023k2.xlsx]

## Sheet: PSM
Filename	Spectrum Number	Spectrum ID	Spectrum Title	Retention Time (minutes)	Precursor m/z	Precursor Intensity	Precursor Charge	Precursor Mass (Da)	Experimental Peaks	Total Intensity	Peptide Sequence	Base Peptide Sequence	Protein Description	Start Residue Number	Stop Residue Number	Missed Cleavages	Theoretical Mass (Da)	Precursor Mass Error (Da)	Precursor Mass Error (ppm)	Matching Products	Total Products	Ratio of Matching Products	Matching Intensity	Fraction of Intensity Matching	Morpheus Score	Target?	Decoy?	Cumulative Target	Cumulative Decoy	Q-Value (%)
F:\25-03-2022\20220324-SAMPLE BROTH-POS-00.d	4581	scanId=2624590		43.743	1061.56	7385.51	2	2121.11	580	46354.9	R.SVTGEYSPLTDISVQLREK.L	SVTGEYSPLTDISVQLREK	DECOY_WP_012291666.1 MULTISPECIES: DNA cytosine methyltransferase [Lysinibacillus]	407	425	1	2121.1	0.0151168	7.12688	9	36	0.25	1744.81	0.0376402	9.03764	FALSE	TRUE	0	1	7.65737
F:\25-03-2022\20220324-SAMPLE BROTH-POS-00.d	3768	scanId=2157331		35.9554	512.811	1719.43	2	1023.61	51	4306.61	K.AIDALVPIGR.G	AIDALVPIGR	WP_012292766.1 MULTISPECIES: F0F1 ATP synthase subunit alpha [Lysinibacillus]	152	161	0	1023.61	-0.00019689	-0.192349	8	18	0.444444	1595.31	0.370434	8.37043	TRUE	FALSE	1	1	7.65737
F:\25-03-2022\20220324-SAMPLE BROTH-POS-00.d	4511	scanId=2589609		43.16	636.842	936.579	2	1271.67	61	3727.76	R.DLATDLIINER.I	DLATDLIINER	WP_012296051.1 MULTISPECIES: 50S ribosomal protein L17 [Lysinibacillus]	19	29	0	1271.67	-0.00330248	-2.59696	7	20	0.35	714.975	0.191797	7.1918	TRUE	FALSE	2	1	7.65737
F:\25-03-2022\20220324-SAMPLE BROTH-POS-00.d	3118	scanId=1773950		29.5657	858.943	907.72	2	1715.87	53	2909.81	R.LANEILDASNNTGASVK.K	LANEILDASNNTGASVK	WP_155593039.1 MULTISPECIES: 30S ribosomal protein S7 [Lysinibacillus]	120	136	0	1715.87	0.00320226	1.86626	7	32	0.21875	543.387	0.186743	7.18674	TRUE	FALSE	3	1	7.65737
F:\25-03-2022\20220324-SAMPLE BROTH-POS-00.d	3597	scanId=2055493		34.2581	849.94	1018.8	2	1697.87	59	3747.89	K.GLEVGQTIVSGPDADIK.V	GLEVGQTIVSGPDADIK	WP_008181913.1 MULTISPECIES: 50S ribosomal protein L2 [Lysinibacillus]	109	125	0	1697.88	-0.0181679	-10.7003	6	32	0.1875	737.083	0.196666	6.19667	TRUE	FALSE	4	1	7.65737
F:\25-03-2022\20220324-SAMPLE BROTH-POS-00.d	2621	scanId=1477697		24.6282	609.301	806.707	2	1216.59	57	3458.27	R.AGDDAAGLAISEK.M	AGDDAAGLAISEK	WP_155591959.1 MULTISPECIES: flagellin Hag [Lysinibacillus]	39	51	0	1216.59	-0.00626368	-5.14854	6	24	0.25	339.531	0.0981795	6.09818	TRUE	FALSE	5	1	7.65737
F:\25-03-2022\20220324-SAMPLE BROTH-POS-00.d	4616	scanId=2638951		43.9824	771.424	10801.6	2	1540.83	351	33148.6	R.VGAWELSPADGKRR.M	VGAWELSPADGKRR	WP_012293342.1 MULTISPECIES: 2-oxoacid:acceptor oxidoreductase subunit alpha [Lysinibacillus]	185	198	2	1540.81	0.0231418	15.0193	6	26	0.230769	651.695	0.0196598	6.01966	TRUE	FALSE	6	1	7.65737
F:\25-03-2022\20220324-SAMPLE BROTH-POS-00.d	2505	scanId=1408768		23.4793	491.793	1038.57	2	981.571	45	3749.64	R.IPAVQEAVR.K	IPAVQEAVR	WP_012295327.1 MULTISPECIES: molecular chaperone DnaK [Lysinibacillus]	316	324	0	981.561	0.00985635	10.0415	5	16	0.3125	665.397	0.177456	5.17746	TRUE	FALSE	7	1	7.65737
F:\25-03-2022\20220324-SAMPLE BROTH-POS-00.d	3859	scanId=2211471		36.8577	729.389	1234.22	2	1456.76	47	3114.69	R.IM(oxidation of M)EVPVGEELIGR.V	IMEVPVGEELIGR	WP_012292766.1 MULTISPECIES: F0F1 ATP synthase subunit alpha [Lysinibacillus]	94	106	0	1456.76	0.00289723	1.98882	5	24	0.208333	536.389	0.172213	5.17221	TRUE	FALSE	8	1	7.65737
F:\25-03-2022\20220324-SAMPLE BROTH-POS-00.d	3832	scanId=2196342		36.6056	729.384	1072.2	2	1456.75	32	2030.1	R.IM(oxidation of M)EVPVGEELIGR.V	IMEVPVGEELIGR	WP_012292766.1 MULTISPECIES: F0F1 ATP synthase subunit alpha [Lysinibacillus]	94	106	0	1456.76	-0.00566387	-3.88799	5	24	0.208333	328.035	0.161586	5.16159	TRUE	FALSE	9	1	7.65737
F:\25-03-2022\20220324-SAMPLE BROTH-POS-00.d	2598	scanId=1463626		24.3936	609.305	815.267	2	1216.6	51	4158.65	R.AGDDAAGLAISEK.M	AGDDAAGLAISEK	WP_155591959.1 MULTISPECIES: flagellin Hag [Lysinibacillus]	39	51	0	1216.59	0.00235673	1.93716	5	24	0.208333	470.368	0.113106	5.11311	TRUE	FALSE	10	1	7.65737
F:\25-03-2022\20220324-SAMPLE BROTH-POS-00.d	4481	scanId=2572657		42.8775	636.841	1121.41	2	1271.67	52	2930.92	R.DLATDLIINER.I	DLATDLIINER	WP_012296051.1 MULTISPECIES: 50S ribosomal protein L17 [Lysinibacillus]	19	29	0	1271.67	-0.00521273	-4.09911	5	20	0.25	317.891	0.108461	5.10846	TRUE	FALSE	11	1	7.65737
F:\25-03-2022\20220324-SAMPLE BROTH-POS-00.d	4556	scanId=2613857		43.5641	1250.61	3777.24	2	2499.21	199	12963.8	K.AKIFC[carbamidomethylation of C]LTSTVEC[carbamidomethylation of C]FAHVFAEAAK.N	AKIFCLTSTVECFAHVFAEAAK	WP_036162046.1 MULTISPECIES: glycosyltransferase [Lysinibacillus]	263	284	1	2499.23	-0.0148026	-5.92285	5	42	0.119048	889.463	0.0686113	5.06861	TRUE	FALSE	12	1	7.65737
F:\25-03-2022\20220324-SAMPLE BROTH-POS-00.d	4746	scanId=2694572		44.9094	759.408	4448.59	2	1516.8	286	29185.4	K.SIGSIASIHAFTEGK.S	SIGSIASIHAFTEGK	WP_036161132.1 MULTISPECIES: GNAT family N-acetyltransferase [Lysinibacillus]	240	254	0	1516.79	0.0124142	8.18455	5	28	0.178571	1291.22	0.0442419	5.04424	TRUE	FALSE	13	1	7.65737
F:\25-03-2022\20220324-SAMPLE BROTH-POS-00.d	4720	scanId=2680852		44.6807	1030.04	4064.19	2	2058.06	252	17919.1	R.TYFLIDKEQSMSIENLK.V	TYFLIDKEQSMSIENLK	DECOY_WP_012292909.1 MULTISPECIES: class I SAM-dependent methyltransferase [Lysinibacillus]	98	114	1	2058.03	0.0244358	11.8733	5	32	0.15625	302.291	0.0168698	5.01687	FALSE	TRUE	13	2	8.65616
F:\25-03-2022\20220324-SAMPLE BROTH-POS-00.d	3619	scanId=2068678		34.4778	612.366	404.06	2	1222.72	39	2636.34	K.AAEVPIIVAVNK.M	AAEVPIIVAVNK	WP_068983117.1 MULTISPECIES: translation initiation factor IF-2 [Lysinibacillus]	359	370	0	1222.73	-0.010319	-8.43934	4	22	0.181818	872.539	0.330966	4.33097	TRUE	FALSE	14	2	8.65616
F:\25-03-2022\20220324-SAMPLE BROTH-POS-00.d	3849	scanId=2206374		36.7728	649.377	1855.96	2	1296.74	54	4089.33	K.AISVPVGEVTLGR.V	AISVPVGEVTLGR	WP_012292768.1 MULTISPECIES: F0F1 ATP synthase subunit beta [Lysinibacillus]	80	92	0	1296.74	-0.000600997	-0.463467	4	24	0.166667	1074.49	0.262755	4.26275	TRUE	FALSE	15	2	8.65616
F:\25-03-2022\20220324-SAMPLE BROTH-POS-00.d	2148	scanId=1194203		19.9032	581.764	658.859	2	1161.51	29	2634.4	R.DEVSAEEVER.E	DEVSAEEVER	WP_012293292.1 MULTISPECIES: translation elongation factor Ts [Lysinibacillus]	196	205	0	1161.51	-0.000953948	-0.821297	4	18	0.222222	480.686	0.182465	4.18247	TRUE	FALSE	16	2	8.65616
F:\25-03-2022\20220324-SAMPLE BROTH-POS-00.d	2183	scanId=1213600		20.2265	408.243	1251.72	2	814.471	32	2694.04	R.LVEVVEK.A	LVEVVEK	WP_008181723.1 MULTISPECIES: 30S ribosomal protein S17 [Lysinibacillus]	77	83	0	814.48	-0.00861565	-10.5781	4	12	0.333333	416.717	0.154681	4.15468	TRUE	FALSE	17	2	8.65616
F:\25-03-2022\20220324-SAMPLE BROTH-POS-00.d	3665	scanId=2096272		34.9377	621.866	815.418	2	1241.72	41	2894.16	K.LEGVLQPLVM(oxidation of M)K.V	LEGVLQPLVMK	WP_012295327.1 MULTISPECIES: molecular chaperone DnaK [Lysinibacillus]	561	571	0	1241.71	0.0122262	9.84627	4	20	0.2	447.596	0.154655	4.15465	TRUE	FALSE	18	2	8.65616
F:\25-03-2022\20220324-SAMPLE BROTH-POS-00.d	3824	scanId=2191357		36.5225	649.379	685.549	2	1296.74	34	2144.34	K.AISVPVGEVTLGR.V	AISVPVGEVTLGR	WP_012292768.1 MULTISPECIES: F0F1 ATP synthase subunit beta [Lysinibacillus]	80	92	0	1296.74	0.0023958	1.84756	4	24	0.166667	321.463	0.149912	4.14991	TRUE	FALSE	19	2	8.65616
F:\25-03-2022\20220324-SAMPLE BROTH-POS-00.d	3146	scanId=1790182		29.8362	606.335	699.988	2	1210.65	50	3567.37	K.AVNPDIDIQVK.Y	AVNPDIDIQVK	WP_012293320.1 MULTISPECIES: BMP family protein [Lysinibacillus]	199	209	0	1210.66	-0.00125671	-1.03804	4	20	0.2	487.67	0.136703	4.1367	TRUE	FALSE	20	2	8.65616
F:\25-03-2022\20220324-SAMPLE BROTH-POS-00.d	3142	scanId=1787800		29.7965	680.841	545.184	2	1359.67	37	2045.82	R.SLDDATQEIIQK.H	SLDDATQEIIQK	WP_012293095.1 MULTISPECIES: 2-oxo acid dehydrogenase subunit E2 [Lysinibacillus]	292	303	0	1359.69	-0.0206609	-15.1953	4	22	0.181818	260.202	0.127187	4.12719	TRUE	FALSE	21	2	8.65616
F:\25-03-2022\20220324-SAMPLE BROTH-POS-00.d	2351	scanId=1314519		21.9085	499.768	1366.37	2	997.521	50	3904.68	K.AQEVPDAIR.K	AQEVPDAIR	WP_008181711.1 MULTISPECIES: 30S ribosomal protein S5 [Lysinibacillus]	54	62	0	997.519	0.00173551	1.73982	4	16	0.25	456.415	0.116889	4.11689	TRUE	FALSE	22	2	8.65616
F:\25-03-2022\20220324-SAMPLE BROTH-POS-00.d	3172	scanId=1805920		30.0985	606.337	548.738	2	1210.66	42	2895.09	K.AVNPDIDIQVK.Y	AVNPDIDIQVK	WP_012293320.1 MULTISPECIES: BMP family protein [Lysinibacillus]	199	209	0	1210.66	0.00410002	3.38661	4	20	0.2	332.094	0.114709	4.11471	TRUE	FALSE	23	2	8.65616
F:\25-03-2022\20220324-SAMPLE BROTH-POS-00.d	4000	scanId=2296254		38.2708	437.255	1225.17	2	872.496	48	4725.94	K.GDLQLLSK.Y	GDLQLLSK	DECOY_WP_206701039.1 MULTISPECIES: group II intron reverse transcriptase/maturase [Lysinibacillus]	21	28	0	872.497	-0.000657245	-0.753293	4	14	0.285714	504.899	0.106836	4.10684	FALSE	TRUE	23	3	10.2978
F:\25-03-2022\20220324-SAMPLE BROTH-POS-00.d	4150	scanId=2382034		39.7004	522.308	974.495	2	1042.6	41	3051.74	K.ADILGNISLK.E	ADILGNISLK	WP_012293201.1 MULTISPECIES: peptide ABC transporter substrate-binding protein [Lysinibacillus]	537	546	0	1042.6	-0.000702673	-0.67396	4	18	0.222222	322.751	0.10576	4.10576	TRUE	FALSE	24	3	10.2978
F:\25-03-2022\20220324-SAMPLE BROTH-POS-00.d	2487	scanId=1397079		23.2845	480.281	1091.89	2	958.547	47	3824.53	K.VSEVGTVIR.I	VSEVGTVIR	WP_012292766.1 MULTISPECIES: F0F1 ATP synthase subunit alpha [Lysinibacillus]	25	33	0	958.545	0.00210133	2.19221	4	16	0.25	386.625	0.101091	4.10109	TRUE	FALSE	25	3	10.2978
F:\25-03-2022\20220324-SAMPLE BROTH-POS-00.d	3053	scanId=1735112		28.9184	408.247	1830.37	2	814.479	38	3491.55	R.EIAEILK.I	EIAEILK	WP_206701081.1 MULTISPECIES: RNA polymerase sigma factor [Lysinibacillus]	127	133	0	814.48	-0.00143596	-1.76304	4	12	0.333333	338.589	0.0969738	4.09697	TRUE	FALSE	26	3	10.2978
F:\25-03-2022\20220324-SAMPLE BROTH-POS-00.d	2799	scanId=1583528		26.392	414.753	856.64	2	827.492	44	3393.56	K.ALALAVDR.Q	ALALAVDR	WP_012293201.1 MULTISPECIES: peptide ABC transporter substrate-binding protein [Lysinibacillus]	328	335	0	827.487	0.0050828	6.14245	4	14	0.285714	283.392	0.0835086	4.08351	TRUE	FALSE	27	3	10.2978
F:\25-03-2022\20220324-SAMPLE BROTH-POS-00.d	2216	scanId=1234325		20.572	429.247	2124.99	2	856.478	55	4811.31	K.VAGIEVNR.K	VAGIEVNR	WP_010860160.1 MULTISPECIES: 50S ribosomal protein L20 [Lysinibacillus]	85	92	0	856.477	0.00180614	2.10881	4	14	0.285714	390.726	0.08121	4.08121	TRUE	FALSE	28	3	10.2978
F:\25-03-2022\20220324-SAMPLE BROTH-POS-00.d	3264	scanId=1860663		31.0109	569.841	665.687	2	1137.67	40	2966.29	K.GPLTTPIGGGIR.S	GPLTTPIGGGIR	WP_031418629.1 MULTISPECIES: NADP-dependent isocitrate dehydrogenase [Lysinibacillus]	90	101	0	1137.65	0.0167414	14.7158	4	22	0.181818	226.521	0.0763653	4.07637	TRUE	FALSE	29	3	10.2978
F:\25-03-2022\20220324-SAMPLE BROTH-POS-00.d	3239	scanId=1845592		30.7597	472.276	5377.9	2	942.537	96	15952.7	K.DRVLEAIK.E	DRVLEAIK	DECOY_WP_012291833.1 MULTISPECIES: DNA gyrase subunit A [Lysinibacillus]	540	547	1	942.55	-0.0126714	-13.4437	4	14	0.285714	1187.21	0.0744204	4.07442	FALSE	TRUE	29	4	13.2728
F:\25-03-2022\20220324-SAMPLE BROTH-POS-00.d	4547	scanId=2609442		43.4906	573.351	1724	2	1144.69	97	7532.45	K.LQIVVDRFR.A	LQIVVDRFR	WP_012294079.1 MULTISPECIES: aspartate kinase [Lysinibacillus]	69	77	1	1144.67	0.0158829	13.8755	4	16	0.25	514.507	0.0683054	4.06831	TRUE	FALSE	30	4	13.2728
F:\25-03-2022\20220324-SAMPLE BROTH-POS-00.d	2172	scanId=1207283		20.1212	522.291	1500.55	2	1042.57	41	2998.34	K.KNEM(oxidation of M)KHLK.E	KNEMKHLK	DECOY_WP_012296222.1 MULTISPECIES: tRNA uridine-5-carboxymethylaminomethyl(34) synthesis enzyme MnmG [Lysinibacillus]	63	70	2	1042.56	0.00844382	8.09913	4	14	0.285714	193.703	0.0646034	4.0646	FALSE	TRUE	30	5	16.591
F:\25-03-2022\20220324-SAMPLE BROTH-POS-00.d	5213	scanId=2957103		49.2849	743.429	1449.28	2	1484.84	143	10311.8	R.LNDILSLIEISQK.I	LNDILSLIEISQK	DECOY_WP_139015353.1 MULTISPECIES: methyltransferase domain-containing protein [Lysinibacillus]	194	206	0	1484.85	-0.00115485	-0.777757	4	24	0.166667	621.078	0.06023	4.06023	FALSE	TRUE	30	6	19.2669
F:\25-03-2022\20220324-SAMPLE BROTH-POS-00.d	4582	scanId=2624923		43.7486	715.904	4462.88	2	1429.79	169	13951.8	R.AAELSDDELKVIK.G	AAELSDDELKVIK	WP_012296215.1 MULTISPECIES: redox-regulated ATPase YchF [Lysinibacillus]	180	192	1	1429.77	0.0279496	19.5484	4	24	0.166667	831.876	0.0596248	4.05962	TRUE	FALSE	31	6	19.2669
F:\25-03-2022\20220324-SAMPLE BROTH-POS-00.d	3621	scanId=2070063		34.5009	735.911	6017.33	2	1469.81	128	11931.2	R.AVC[carbamidomethylation of C]ISHTVKTNLK.H	AVCISHTVKTNLK	DECOY_WP_031418233.1 MULTISPECIES: cytidine deaminase [Lysinibacillus]	60	72	1	1469.8	0.0059	4.01415	4	24	0.166667	599.907	0.0502804	4.05028	FALSE	TRUE	31	7	22.4781
F:\25-03-2022\20220324-SAMPLE BROTH-POS-00.d	4593	scanId=2629827		43.8303	1038.03	7154.11	2	2074.05	363	29885.4	-.M(oxidation of M)FVDGFYEKASRLGAVLR.D	MFVDGFYEKASRLGAVLR	DECOY_WP_012292331.1 MULTISPECIES: cysteine desulfurase [Lysinibacillus]	1	18	2	2074.07	-0.0179678	-8.66306	4	34	0.117647	1095.13	0.0366443	4.03664	FALSE	TRUE	31	8	25.6892
F:\25-03-2022\20220324-SAMPLE BROTH-POS-00.d	4566	scanId=2618449		43.6407	553.829	3107.57	2	1105.64	127	10722.9	K.RAISEVLYR.Y	RAISEVLYR	DECOY_WP_012295782.1 MULTISPECIES: RNA polymerase sigma factor SigB [Lysinibacillus]	216	224	1	1105.62	0.0192882	17.4456	4	16	0.25	388.118	0.0361954	4.0362	FALSE	TRUE	31	9	27.1489
F:\25-03-2022\20220324-SAMPLE BROTH-POS-00.d	4705	scanId=2673189		44.553	1227.63	2677.08	2	2453.25	273	16794.9	R.RLGNEFLFQELATANIDEFVK.N	RLGNEFLFQELATANIDEFVK	WP_031418479.1 MULTISPECIES: heterodisulfide reductase-related iron-sulfur binding cluster [Lysinibacillus]	509	529	1	2453.26	-0.00853745	-3.48004	4	40	0.1	589.181	0.035081	4.03508	TRUE	FALSE	32	9	27.1489
F:\25-03-2022\20220324-SAMPLE BROTH-POS-00.d	4685	scanId=2665485		44.4246	702.877	4360.81	2	1403.74	275	22031	-.M(oxidation of M)ANEVRSQVNIK.L	MANEVRSQVNIK	WP_012292715.1 MULTISPECIES: DUF1934 domain-containing protein [Lysinibacillus]	1	12	1	1403.72	0.0200906	14.3124	4	22	0.181818	741.251	0.0336459	4.03365	TRUE	FALSE	33	9	27.1489
F:\25-03-2022\20220324-SAMPLE BROTH-POS-00.d	4664	scanId=2657199		44.2865	795.925	4329.17	2	1589.84	267	18472	R.EAVYGDIKGAELAVR.M	EAVYGDIKGAELAVR	DECOY_WP_031418189.1 MULTISPECIES: transporter substrate-binding domain-containing protein [Lysinibacillus]	75	89	1	1589.84	-0.00494183	-3.10838	4	28	0.142857	603.857	0.0326904	4.03269	FALSE	TRUE	33	10	28.4417
F:\25-03-2022\20220324-SAMPLE BROTH-POS-00.d	4701	scanId=2671204		44.5199	607.38	4331.69	2	1212.74	169	12901.5	K.AIQIAILKGMR.K	AIQIAILKGMR	WP_012295634.1 MULTISPECIES: class I SAM-dependent methyltransferase [Lysinibacillus]	57	67	1	1212.74	0.00705583	5.8181	4	20	0.2	344.421	0.0266962	4.0267	TRUE	FALSE	34	10	28.4417
F:\25-03-2022\20220324-SAMPLE BROTH-POS-00.d	4595	scanId=2630493		43.8414	809.909	5591.46	2	1617.8	254	20246.5	K.NALDFLRVEWNNK.A	NALDFLRVEWNNK	WP_012295234.1 MULTISPECIES: NAD(P)H-dependent oxidoreductase [Lysinibacillus]	89	101	1	1617.83	-0.0219031	-13.5386	4	24	0.166667	537.611	0.0265533	4.02655	TRUE	FALSE	35	10	28.4417
F:\25-03-2022\20220324-SAMPLE BROTH-POS-00.d	2889	scanId=1637323		27.2886	555.83	7661.61	2	1109.65	106	8373.02	R.IGGGIPTTLPGK.I	IGGGIPTTLPGK	DECOY_WP_031418629.1 MULTISPECIES: NADP-dependent isocitrate dehydrogenase [Lysinibacillus]	322	333	0	1109.64	0.00185471	1.67145	4	22	0.181818	194.479	0.0232268	4.02323	FALSE	TRUE	35	11	31.2858
F:\25-03-2022\20220324-SAMPLE BROTH-POS-00.d	4669	scanId=2659396		44.3231	641.883	7284.48	2	1281.75	251	20160.2	K.LVNVYLSSFIK.D	LVNVYLSSFIK	DECOY_WP_036160835.1 MULTISPECIES: DUF115 domain-containing protein [Lysinibacillus]	431	441	0	1281.73	0.0174227	13.5931	4	20	0.2	432.125	0.0214346	4.02143	FALSE	TRUE	35	12	34.13
F:\25-03-2022\20220324-SAMPLE BROTH-POS-00.d	4683	scanId=2664819		44.4135	696.901	23632.3	2	1391.79	239	22029.6	R.KQVVQLYTEAIT.-	KQVVQLYTEAIT	DECOY_WP_012293922.1 MULTISPECIES: DUF1572 family protein [Lysinibacillus]	168	179	1	1391.77	0.0222335	15.975	4	22	0.181818	406.817	0.0184668	4.01847	FALSE	TRUE	35	13	35.9471
F:\25-03-2022\20220324-SAMPLE BROTH-POS-00.d	4951	scanId=2814837		46.9138	792.927	3731.71	2	1583.84	221	17092.9	R.GQVINEDLLKQAEK.D	GQVINEDLLKQAEK	WP_232901020.1 MULTISPECIES: cell wall-binding protein [Lysinibacillus]	1259	1272	1	1583.85	-0.012997	-8.20594	4	26	0.153846	314.108	0.0183765	4.01838	TRUE	FALSE	36	13	35.9471
F:\25-03-2022\20220324-SAMPLE BROTH-POS-00.d	4755	scanId=2699696		44.9948	1336.21	3238.25	2	2670.4	298	17098.3	K.VGAENIAKVVEGATTIRDM(oxidation of M)ILAIDR.S	VGAENIAKVVEGATTIRDMILAIDR	DECOY_WP_012295578.1 MULTISPECIES: phenylalanine--tRNA ligase subunit beta [Lysinibacillus]	64	88	2	2670.44	-0.033091	-12.3916	4	48	0.0833333	293.101	0.0171421	4.01714	FALSE	TRUE	36	14	36.6748
F:\25-03-2022\20220324-SAMPLE BROTH-POS-00.d	4686	scanId=2665818		44.4302	729.933	4262.95	2	1457.85	268	21590.8	R.IGEEIIM(oxidation of M)RQLIK.-	IGEEIIMRQLIK	WP_031417856.1 MULTISPECIES: GNAT family N-acetyltransferase [Lysinibacillus]	148	159	1	1457.83	0.0236459	16.2199	4	22	0.181818	334.313	0.0154841	4.01548	TRUE	FALSE	37	14	36.6748
F:\25-03-2022\20220324-SAMPLE BROTH-POS-00.d	4527	scanId=2599245		43.3206	1104	1083.31	2	2205.99	97	10490.6	K.QVVSAATAC[carbamidomethylation of C]IPFLENDDSNR.A	QVVSAATACIPFLENDDSNR	WP_031416725.1 MULTISPECIES: DNA-directed RNA polymerase subunit beta [Lysinibacillus]	619	638	0	2206.03	-0.0426981	-19.3552	4	38	0.105263	158.627	0.0151209	4.01512	TRUE	FALSE	38	14	36.6748
F:\25-03-2022\20220324-SAMPLE BROTH-POS-00.d	4624	scanId=2641940		44.0322	628.384	35198.9	2	1254.75	284	32417.3	R.TAKLPLQIMIK.T	TAKLPLQIMIK	DECOY_WP_217581625.1 MULTISPECIES: sensor histidine kinase [Lysinibacillus]	5	15	1	1254.77	-0.0209125	-16.6664	4	20	0.2	486.026	0.0149928	4.01499	FALSE	TRUE	38	15	37.1188
F:\25-03-2022\20220324-SAMPLE BROTH-POS-00.d	4647	scanId=2651503		44.1916	716.434	7733.22	2	1430.85	376	43549.3	K.QKVIAAIYRLEK.E	QKVIAAIYRLEK	DECOY_WP_025114538.1 MULTISPECIES: MarR family transcriptional regulator [Lysinibacillus]	123	134	2	1430.86	-0.0066637	-4.65713	4	22	0.181818	357.727	0.0082143	4.00821	FALSE	TRUE	38	16	37.1188
F:\25-03-2022\20220324-SAMPLE BROTH-POS-00.d	4658	scanId=2655220		44.2535	718.913	10516.4	2	1435.81	313	30407.5	K.IHALEIEAKERK.A	IHALEIEAKERK	DECOY_WP_012295298.1 MULTISPECIES: hypothetical protein [Lysinibacillus]	95	106	2	1435.81	-0.00360591	-2.51141	4	22	0.181818	179.012	0.00588711	4.00589	FALSE	TRUE	38	17	37.1188
F:\25-03-2022\20220324-SAMPLE BROTH-POS-00.d	4687	scanId=2666150		44.4357	748.915	3879.65	2	1495.81	305	22994.8	R.SHALLLESETLRK.E	SHALLLESETLRK	WP_054549978.1 MULTISPECIES: endonuclease MutS2 [Lysinibacillus]	542	554	1	1495.84	-0.020931	-13.9929	4	24	0.166667	116.645	0.00507268	4.00507	TRUE	FALSE	39	17	37.1188
F:\25-03-2022\20220324-SAMPLE BROTH-POS-00.d	4642	scanId=2648418		44.1402	694.422	13536.4	2	1386.83	333	38084.2	R.IAIKLTSSNSIIK.T	IAIKLTSSNSIIK	DECOY_WP_054611615.1 MULTISPECIES: TetR/AcrR family transcriptional regulator [Lysinibacillus]	111	123	1	1386.84	-0.0151732	-10.9408	4	24	0.166667	128.449	0.00337277	4.00337	FALSE	TRUE	39	18	37.1188
F:\25-03-2022\20220324-SAMPLE BROTH-POS-00.d	3970	scanId=2277749		37.9624	998.54	592.72	2	1995.06	31	2769.66	K.ELLREPLM(oxidation of M)AAHKSLTDR.E	ELLREPLMAAHKSLTDR	WP_031419855.1 MULTISPECIES: dipeptide/oligopeptide/nickel ABC transporter ATP-binding protein [Lysinibacillus]	98	114	2	1995.06	0.00740576	3.71205	3	32	0.09375	759.005	0.274043	3.27404	TRUE	FALSE	40	18	37.1188
F:\25-03-2022\20220324-SAMPLE BROTH-POS-00.d	2916	scanId=1653560		27.5592	487.276	2413.85	2	972.537	53	4597.6	K.ELSNKQVR.D	ELSNKQVR	WP_158511880.1 MULTISPECIES: topoisomerase C-terminal repeat-containing protein [Lysinibacillus]	70	77	1	972.535	0.00185699	1.90943	3	14	0.214286	800.522	0.174117	3.17412	TRUE	FALSE	41	18	37.1188
F:\25-03-2022\20220324-SAMPLE BROTH-POS-00.d	1828	scanId=1005894		16.7648	562.293	1532.94	2	1122.57	72	7822.9	K.YREIHMFK.M	YREIHMFK	DECOY_WP_031416965.1 MULTISPECIES: anthranilate synthase component I [Lysinibacillus]	120	127	1	1122.56	0.00710012	6.32491	3	14	0.214286	1323.23	0.169148	3.16915	FALSE	TRUE	41	19	37.1188
F:\25-03-2022\20220324-SAMPLE BROTH-POS-00.d	3975	scanId=2280632		38.0104	907.464	336.405	2	1812.91	24	1394.07	K.AHLQQEVTHLQPVADK.L	AHLQQEVTHLQPVADK	WP_012293531.1 MULTISPECIES: chitobiase/beta-hexosaminidase C-terminal domain-containing protein [Lysinibacillus]	938	953	0	1812.95	-0.035638	-19.6575	3	30	0.1	225.664	0.161874	3.16187	TRUE	FALSE	42	19	37.1188
F:\25-03-2022\20220324-SAMPLE BROTH-POS-00.d	2144	scanId=1191821		19.8636	336.708	1023.8	2	671.401	40	3869.14	K.IGDIVR.I	IGDIVR	WP_008181723.1 MULTISPECIES: 30S ribosomal protein S17 [Lysinibacillus]	57	62	0	671.397	0.00453182	6.74984	3	10	0.3	622.616	0.160919	3.16092	TRUE	FALSE	43	19	37.1188
F:\25-03-2022\20220324-SAMPLE BROTH-POS-00.d	3883	scanId=2225104		37.0849	747.898	1265.07	2	1493.78	50	3526.43	K.QTETVPAQHNKNK.Q	QTETVPAQHNKNK	DECOY_WP_036162792.1 MULTISPECIES: non-ribosomal peptide synthetase [Lysinibacillus]	485	497	1	1493.76	0.0223013	14.9297	3	24	0.125	518.816	0.147122	3.14712	FALSE	TRUE	43	20	37.1188
F:\25-03-2022\20220324-SAMPLE BROTH-POS-00.d	3357	scanId=1916407		31.94	782.405	582.766	2	1562.8	40	2879.71	K.DRSQC[carbamidomethylation of C]KILVNMSL.-	DRSQCKILVNMSL	WP_036225052.1 MULTISPECIES: 2,3-butanediol dehydrogenase [Lysinibacillus]	327	339	2	1562.79	0.00486237	3.11134	3	24	0.125	397.87	0.138163	3.13816	TRUE	FALSE	44	20	37.1188
F:\25-03-2022\20220324-SAMPLE BROTH-POS-00.d	2591	scanId=1458973		24.3161	387.225	4666.97	2	772.435	52	6402.64	K.LDERLK.A	LDERLK	DECOY_WP_012293641.1 MULTISPECIES: long-chain fatty acid--CoA ligase [Lysinibacillus]	9	14	1	772.444	-0.00940235	-12.1722	3	10	0.3	878.772	0.137252	3.13725	FALSE	TRUE	44	21	37.1188
F:\25-03-2022\20220324-SAMPLE BROTH-POS-00.d	1864	scanId=1027616		17.1268	422.742	743.175	2	843.47	28	2112.65	R.VIDAAVEK.A	VIDAAVEK	WP_031418629.1 MULTISPECIES: NADP-dependent isocitrate dehydrogenase [Lysinibacillus]	39	46	0	843.47	-0.000288627	-0.34219	3	14	0.214286	284.984	0.134894	3.13489	TRUE	FALSE	45	21	37.1188
F:\25-03-2022\20220324-SAMPLE BROTH-POS-00.d	1911	scanId=1054829		17.5803	493.289	1058.98	2	984.563	38	3056.57	R.AIVVQEAQK.Q	AIVVQEAQK	WP_012293094.1 MULTISPECIES: alpha-ketoacid dehydrogenase subunit beta [Lysinibacillus]	257	265	0	984.56	0.00310016	3.14877	3	16	0.1875	412.03	0.134801	3.1348	TRUE	FALSE	46	21	37.1188
F:\25-03-2022\20220324-SAMPLE BROTH-POS-00.d	4402	scanId=2528717		42.1452	709.384	1140.75	2	1416.75	43	2764.66	R.QIQAM(oxidation of M)EQLLAEK.Y	QIQAMEQLLAEK	WP_012293150.1 MULTISPECIES: bacillithiol biosynthesis cysteine-adding enzyme BshC [Lysinibacillus]	424	435	0	1416.73	0.0253269	17.877	3	22	0.136364	367.387	0.132887	3.13289	TRUE	FALSE	47	21	37.1188
F:\25-03-2022\20220324-SAMPLE BROTH-POS-00.d	4058	scanId=2329556		38.8258	469.805	1047.68	2	937.595	51	4311.85	R.VVIPIELR.R	VVIPIELR	WP_010857015.1 MULTISPECIES: AbrB/MazE/SpoVT family DNA-binding domain-containing protein [Lysinibacillus]	16	23	0	937.596	-0.00102837	-1.09681	3	14	0.214286	552.609	0.12816	3.12816	TRUE	FALSE	48	21	37.1188
F:\25-03-2022\20220324-SAMPLE BROTH-POS-00.d	3244	scanId=1848860		30.8142	569.83	726.511	2	1137.65	40	2289.83	K.GPLTTPIGGGIR.S	GPLTTPIGGGIR	WP_031418629.1 MULTISPECIES: NADP-dependent isocitrate dehydrogenase [Lysinibacillus]	90	101	0	1137.65	-0.00469124	-4.12362	3	22	0.136364	291.145	0.127147	3.12715	TRUE	FALSE	49	21	37.1188
F:\25-03-2022\20220324-SAMPLE BROTH-POS-00.d	3956	scanId=2269599		37.8265	729.4	621.805	2	1456.78	31	2130.37	K.DGIVYIVGAGPGDPK.L	DGIVYIVGAGPGDPK	WP_031417498.1 MULTISPECIES: uroporphyrinogen-III C-methyltransferase [Lysinibacillus]	3	17	0	1456.76	0.0285652	19.6087	3	28	0.107143	267.194	0.125421	3.12542	TRUE	FALSE	50	21	37.1188
F:\25-03-2022\20220324-SAMPLE BROTH-POS-00.d	3008	scanId=1707633		28.4604	529.796	1673.85	2	1057.58	51	3856.45	R.LQQATDAAIK.Y	LQQATDAAIK	WP_012293081.1 MULTISPECIES: ribonuclease J1 [Lysinibacillus]	238	247	0	1057.58	0.00054761	0.517797	3	18	0.166667	461.931	0.119781	3.11978	TRUE	FALSE	51	21	37.1188
F:\25-03-2022\20220324-SAMPLE BROTH-POS-00.d	4139	scanId=2376271		39.6044	422.27	714.794	2	842.525	41	3345.26	R.ELSLLLR.R	ELSLLLR	WP_012292766.1 MULTISPECIES: F0F1 ATP synthase subunit alpha [Lysinibacillus]	272	278	0	842.523	0.00223765	2.65589	3	12	0.25	382.643	0.114384	3.11438	TRUE	FALSE	52	21	37.1188
F:\25-03-2022\20220324-SAMPLE BROTH-POS-00.d	2205	scanId=1227289		20.4547	408.247	1514.3	2	814.48	46	4338.01	R.LVEVVEK.A	LVEVVEK	WP_008181723.1 MULTISPECIES: 30S ribosomal protein S17 [Lysinibacillus]	77	83	0	814.48	0.000412673	0.50667	3	12	0.25	492.424	0.113514	3.11351	TRUE	FALSE	53	21	37.1188
F:\25-03-2022\20220324-SAMPLE BROTH-POS-00.d	555	scanId=296651		4.94405	504.272	1402.43	2	1006.53	56	5035.91	-.M(oxidation of M)SIREDIK.K	MSIREDIK	WP_031416518.1 MULTISPECIES: MurR/RpiR family transcriptional regulator [Lysinibacillus]	1	8	1	1006.51	0.0181407	18.0233	3	14	0.214286	565.005	0.112195	3.1122	TRUE	FALSE	54	21	37.1188
F:\25-03-2022\20220324-SAMPLE BROTH-POS-00.d	2133	scanId=1184951		19.7491	430.741	795.667	2	859.468	64	5409.14	K.LEEITGAK.I	LEEITGAK	DECOY_WP_012292730.1 MULTISPECIES: TetR/AcrR family transcriptional regulator [Lysinibacillus]	114	121	0	859.465	0.00334237	3.8889	3	14	0.214286	604.976	0.111843	3.11184	FALSE	TRUE	54	22	37.1188
F:\25-03-2022\20220324-SAMPLE BROTH-POS-00.d	3987	scanId=2288554		38.1424	521.82	1028.1	2	1041.63	45	3252.39	R.ALHKFISAR.A	ALHKFISAR	WP_012292448.1 MULTISPECIES: GMC family oxidoreductase [Lysinibacillus]	461	469	1	1041.61	0.016863	16.1894	3	16	0.1875	360.015	0.110693	3.11069	TRUE	FALSE	55	22	37.1188
F:\25-03-2022\20220324-SAMPLE BROTH-POS-00.d	4504	scanId=2585842		43.0972	871.457	1019.03	2	1740.9	71	4513.56	R.VGGEIHDYRGKNQLR.I	VGGEIHDYRGKNQLR	WP_012292178.1 MULTISPECIES: 3'-5' exoribonuclease YhaM [Lysinibacillus]	68	82	2	1740.9	-0.00310546	-1.78382	3	28	0.107143	457.491	0.101359	3.10136	TRUE	FALSE	56	22	37.1188
F:\25-03-2022\20220324-SAMPLE BROTH-POS-00.d	4461	scanId=2561910		42.6984	681.873	2339.1	2	1361.73	101	8291.12	-.M(oxidation of M)ASNSNQVLVRK.E	MASNSNQVLVRK	WP_112117412.1 MULTISPECIES: oligoendopeptidase F [Lysinibacillus]	1	12	1	1361.71	0.0230418	16.9213	3	22	0.136364	794.416	0.0958153	3.09582	TRUE	FALSE	57	22	37.1188
F:\25-03-2022\20220324-SAMPLE BROTH-POS-00.d	2665	scanId=1504016		25.0668	651.828	2134.04	2	1301.64	61	5119.14	K.NNEIQSIEDLK.G	NNEIQSIEDLK	WP_012295593.1 MULTISPECIES: transporter substrate-binding domain-containing protein [Lysinibacillus]	138	148	0	1301.65	-0.00560823	-4.30856	3	20	0.15	484.295	0.0946047	3.0946	TRUE	FALSE	58	22	37.1188
F:\25-03-2022\20220324-SAMPLE BROTH-POS-00.d	3642	scanId=2082589		34.7097	621.857	506.344	2	1241.7	34	2171.52	K.LEGVLQPLVM(oxidation of M)K.V	LEGVLQPLVMK	WP_012295327.1 MULTISPECIES: molecular chaperone DnaK [Lysinibacillus]	561	571	0	1241.71	-0.00590644	-4.75672	3	20	0.15	203.662	0.0937879	3.09379	TRUE	FALSE	59	22	37.1188
F:\25-03-2022\20220324-SAMPLE BROTH-POS-00.d	4048	scanId=2324072		38.7344	587.317	3625.44	2	1172.62	71	6829.11	K.LALSKAENEAK.K	LALSKAENEAK	DECOY_WP_031416573.1 MULTISPECIES: C40 family peptidase [Lysinibacillus]	180	190	1	1172.64	-0.0197	-16.7997	3	20	0.15	626.742	0.0917751	3.09178	FALSE	TRUE	59	23	37.9222
F:\25-03-2022\20220324-SAMPLE BROTH-POS-00.d	2402	scanId=1344773		22.4127	304.199	1416.93	2	606.384	50	4470.57	K.ILSFK.L	ILSFK	WP_012292940.1 MULTISPECIES: fumarylacetoacetate hydrolase family protein [Lysinibacillus]	3	7	0	606.374	0.00980471	16.1694	3	8	0.375	405.26	0.0906505	3.09065	TRUE	FALSE	60	23	37.9222
F:\25-03-2022\20220324-SAMPLE BROTH-POS-00.d	2099	scanId=1164781		19.4129	446.732	1263.17	2	891.449	48	4273.61	K.KNDM(oxidation of M)QLK.H	KNDMQLK	DECOY_WP_036161414.1 MULTISPECIES: SDR family oxidoreductase [Lysinibacillus]	166	172	1	891.448	0.00107386	1.20462	3	12	0.25	384.273	0.0899175	3.08992	FALSE	TRUE	60	24	37.9222
F:\25-03-2022\20220324-SAMPLE BROTH-POS-00.d	3576	scanId=2042420		34.0402	524.294	1258.64	2	1046.57	46	3492.3	K.QELLQAAFK.S	QELLQAAFK	WP_012295365.1 MULTISPECIES: 30S ribosomal protein S20 [Lysinibacillus]	47	55	0	1046.58	-0.00359779	-3.43767	3	16	0.1875	311.47	0.0891876	3.08919	TRUE	FALSE	61	24	37.9222
F:\25-03-2022\20220324-SAMPLE BROTH-POS-00.d	3299	scanId=1881833		31.3637	495.282	1079.85	2	988.549	53	3515.83	K.AEEISSLIK.Q	AEEISSLIK	WP_012292766.1 MULTISPECIES: F0F1 ATP synthase subunit alpha [Lysinibacillus]	5	13	0	988.544	0.00514402	5.20363	3	16	0.1875	311.681	0.0886509	3.08865	TRUE	FALSE	62	24	37.9222
F:\25-03-2022\20220324-SAMPLE BROTH-POS-00.d	4201	scanId=2411235		40.1871	603.79	1028.52	2	1205.57	45	2661.99	K.M(oxidation of M)IVVVDDEDR.E	MIVVVDDEDR	WP_075807269.1 3,4-dihydroxy-2-butanone-4-phosphate synthase [Lysinibacillus agricola]	17	26	0	1205.56	0.00533292	4.4236	3	18	0.166667	235.021	0.0882876	3.08829	TRUE	FALSE	63	24	37.9222
F:\25-03-2022\20220324-SAMPLE BROTH-POS-00.d	3421	scanId=1953525		32.5586	879.464	1254.63	2	1756.91	49	4982.25	K.EDLSGIHQIFSRDIK.L	EDLSGIHQIFSRDIK	DECOY_WP_012293757.1 MULTISPECIES: GGDEF domain-containing phosphodiesterase [Lysinibacillus]	72	86	1	1756.91	0.00203639	1.15908	3	28	0.107143	427.848	0.0858743	3.08587	FALSE	TRUE	63	25	38.0616
F:\25-03-2022\20220324-SAMPLE BROTH-POS-00.d	2960	scanId=1679713		27.9951	494.292	1281.94	2	986.57	46	3484.41	M.IARETLER.N	IARETLER	WP_036162758.1 MULTISPECIES: bile acid:sodium symporter [Lysinibacillus]	2	9	1	986.551	0.0193892	19.6535	3	14	0.214286	298.562	0.085685	3.08569	TRUE	FALSE	64	25	38.0616
F:\25-03-2022\20220324-SAMPLE BROTH-POS-00.d	3062	scanId=1740764		29.0126	582.29	2906.52	2	1162.57	64	6167.32	K.TPNKFAQDDK.D	TPNKFAQDDK	DECOY_WP_036161696.1 MULTISPECIES: carbamate kinase [Lysinibacillus]	184	193	1	1162.56	0.00389698	3.35206	3	18	0.166667	513.578	0.0832742	3.08327	FALSE	TRUE	64	26	38.0616
F:\25-03-2022\20220324-SAMPLE BROTH-POS-00.d	2214	scanId=1232940		20.5489	661.345	685.353	2	1320.68	54	3301.79	K.AMVMGMPSELKK.G	AMVMGMPSELKK	WP_012293715.1 MULTISPECIES: GHKL domain-containing protein [Lysinibacillus]	105	116	1	1320.66	0.0152758	11.5668	3	22	0.136364	274.52	0.0831428	3.08314	TRUE	FALSE	65	26	38.0616
F:\25-03-2022\20220324-SAMPLE BROTH-POS-00.d	1691	scanId=926532		15.4421	365.218	1813	2	728.421	49	3957.89	R.ALVSDPK.L	ALVSDPK	WP_012295214.1 MULTISPECIES: ABC transporter ATP-binding protein [Lysinibacillus]	155	161	0	728.407	0.0143381	19.6842	3	12	0.25	328.171	0.0829157	3.08292	TRUE	FALSE	66	26	38.0616
F:\25-03-2022\20220324-SAMPLE BROTH-POS-00.d	3177	scanId=1809189		30.153	565.308	637.204	2	1128.6	34	2432.85	K.ALEAGELEGIK.A	ALEAGELEGIK	WP_012295327.1 MULTISPECIES: molecular chaperone DnaK [Lysinibacillus]	545	555	0	1128.6	-0.000480254	-0.42553	3	20	0.15	199.68	0.0820766	3.08208	TRUE	FALSE	67	26	38.0616
F:\25-03-2022\20220324-SAMPLE BROTH-POS-00.d	3607	scanId=2061863		34.3642	515.805	923.847	2	1029.6	62	3567.59	R.FAIDPVLQK.H	FAIDPVLQK	WP_031417987.1 MULTISPECIES: ubiquinol-cytochrome c reductase iron-sulfur subunit [Lysinibacillus]	34	42	0	1029.59	0.0101064	9.81601	3	16	0.1875	279.58	0.0783667	3.07837	TRUE	FALSE	68	26	38.0616
F:\25-03-2022\20220324-SAMPLE BROTH-POS-00.d	3753	scanId=2147861		35.7976	577.331	1402.13	2	1152.65	63	5611.72	K.ARIFGNGYKK.H	ARIFGNGYKK	DECOY_WP_012293036.1 MULTISPECIES: RNA degradosome polyphosphate kinase [Lysinibacillus]	157	166	2	1152.64	0.00795117	6.89822	3	18	0.166667	435.505	0.0776064	3.07761	FALSE	TRUE	68	27	38.3962
F:\25-03-2022\20220324-SAMPLE BROTH-POS-00.d	2874	scanId=1629125		27.1519	556.332	4496.8	2	1110.65	110	12399.8	R.IGVGRAGTRPK.T	IGVGRAGTRPK	WP_012293767.1 MULTISPECIES: ethanolamine ammonia-lyase subunit EutC [Lysinibacillus]	111	121	1	1110.66	-0.012891	-11.6066	3	20	0.15	938.25	0.0756666	3.07567	TRUE	FALSE	69	27	38.3962
F:\25-03-2022\20220324-SAMPLE BROTH-POS-00.d	2054	scanId=1138464		18.9743	478.753	733.967	2	955.491	39	2850.72	R.GAIPEDVQK.V	GAIPEDVQK	WP_012293320.1 MULTISPECIES: BMP family protein [Lysinibacillus]	330	338	0	955.497	-0.006078	-6.36109	3	16	0.1875	214.385	0.0752039	3.0752	TRUE	FALSE	70	27	38.3962
F:\25-03-2022\20220324-SAMPLE BROTH-POS-00.d	2268	scanId=1265581		21.0929	618.843	937.002	2	1235.67	52	4112.02	K.LDSITQLQYR.E	LDSITQLQYR	DECOY_WP_036161309.1 MULTISPECIES: ABC transporter permease/substrate-binding protein [Lysinibacillus]	147	156	0	1235.65	0.0210602	17.0438	3	18	0.166667	305.709	0.0743454	3.07435	FALSE	TRUE	70	28	39.8183
F:\25-03-2022\20220324-SAMPLE BROTH-POS-00.d	4055	scanId=2328558		38.8092	788.406	3671.29	2	1574.8	97	8711.51	R.TIAEMNKQVVEEGK.K	TIAEMNKQVVEEGK	DECOY_WP_012293342.1 MULTISPECIES: 2-oxoacid:acceptor oxidoreductase subunit alpha [Lysinibacillus]	410	423	1	1574.8	0.0008926	0.566803	3	26	0.115385	634.054	0.0727835	3.07278	FALSE	TRUE	70	29	40.0948
F:\25-03-2022\20220324-SAMPLE BROTH-POS-00.d	3026	scanId=1718824		28.6469	624.344	1351.21	2	1246.67	37	3141.33	K.VTTPGMEKTKR.G	VTTPGMEKTKR	WP_012292930.1 MULTISPECIES: PDZ domain-containing protein [Lysinibacillus]	169	179	2	1246.67	0.00382965	3.07191	3	20	0.15	225.9	0.0719123	3.07191	TRUE	FALSE	71	29	40.0948
F:\25-03-2022\20220324-SAMPLE BROTH-POS-00.d	3371	scanId=1924107		32.0683	647.319	745.324	2	1292.62	50	3146.34	K.VGDISVADFNEK.A	VGDISVADFNEK	WP_012292180.1 MULTISPECIES: peptidylprolyl isomerase [Lysinibacillus]	33	44	0	1292.62	-0.00229908	-1.77861	3	22	0.136364	222.802	0.070813	3.07081	TRUE	FALSE	72	29	40.0948
F:\25-03-2022\20220324-SAMPLE BROTH-POS-00.d	2890	scanId=1637656		27.2941	457.277	1458.13	2	912.54	60	4643.68	R.IAVISGPTR.G	IAVISGPTR	DECOY_WP_012295469.1 MULTISPECIES: rod shape-determining protein [Lysinibacillus]	276	284	0	912.539	0.000557096	0.61049	3	16	0.1875	325.529	0.0701015	3.0701	FALSE	TRUE	72	30	41.4774
F:\25-03-2022\20220324-SAMPLE BROTH-POS-00.d	4496	scanId=2581742		43.0289	757.415	3136.41	2	1512.82	130	9922.97	K.RKEAEAIEEPTLK.V	RKEAEAIEEPTLK	DECOY_WP_012292591.1 MULTISPECIES: Na+/H+ antiporter NhaC [Lysinibacillus]	18	30	2	1512.81	0.000474124	0.313405	3	24	0.125	693.09	0.0698471	3.06985	FALSE	TRUE	72	31	42.86
F:\25-03-2022\20220324-SAMPLE BROTH-POS-00.d	3309	scanId=1887650		31.4607	639.346	996.25	2	1276.68	54	3295.43	R.IAKSQLTQM(oxidation of M)NK.I	IAKSQLTQMNK	DECOY_WP_031418523.1 MULTISPECIES: DEAD/DEAH box helicase [Lysinibacillus]	332	342	1	1276.68	-0.00367707	-2.88018	3	20	0.15	225.965	0.0685692	3.06857	FALSE	TRUE	72	32	43.1765
F:\25-03-2022\20220324-SAMPLE BROTH-POS-00.d	2393	scanId=1339506		22.325	472.776	962.719	2	943.537	53	4055.02	K.DLNKQAKK.R	DLNKQAKK	DECOY_WP_031419226.1 MULTISPECIES: bis(5'-nucleosyl)-tetraphosphatase (symmetrical) YqeK [Lysinibacillus]	42	49	2	943.545	-0.00799399	-8.47229	3	14	0.214286	270.931	0.0668136	3.06681	FALSE	TRUE	72	33	43.1765
F:\25-03-2022\20220324-SAMPLE BROTH-POS-00.d	3525	scanId=2013607		33.56	642.875	732.828	2	1283.73	68	4378.73	R.LAQYIGQHKVK.E	LAQYIGQHKVK	WP_036162238.1 MULTISPECIES: Holliday junction branch migration DNA helicase RuvB [Lysinibacillus]	26	36	1	1283.74	-0.000462779	-0.360494	3	20	0.15	288.165	0.0658101	3.06581	TRUE	FALSE	73	33	43.1765
F:\25-03-2022\20220324-SAMPLE BROTH-POS-00.d	3302	scanId=1883550		31.3924	816.929	779.393	2	1631.84	56	4407.66	K.TMQITDKNGPMVAVK.T	TMQITDKNGPMVAVK	WP_012291833.1 MULTISPECIES: DNA gyrase subunit A [Lysinibacillus]	740	754	1	1631.84	0.00661347	4.05277	3	28	0.107143	286.618	0.0650272	3.06503	TRUE	FALSE	74	33	43.1765
F:\25-03-2022\20220324-SAMPLE BROTH-POS-00.d	3454	scanId=1972977		32.8828	547.282	902.409	2	1092.55	57	4604.61	K.FDTVLDIDR.N	FDTVLDIDR	WP_036160583.1 MULTISPECIES: HAMP domain-containing histidine kinase [Lysinibacillus]	205	213	0	1092.55	0.00429024	3.92683	3	16	0.1875	283.74	0.0616209	3.06162	TRUE	FALSE	75	33	43.1765
F:\25-03-2022\20220324-SAMPLE BROTH-POS-00.d	3166	scanId=1802319		30.0385	673.863	599.019	2	1345.71	47	2548.87	R.MKLTEAQRLEK.Y	MKLTEAQRLEK	WP_012292514.1 MULTISPECIES: DUF2252 family protein [Lysinibacillus]	33	43	2	1345.74	-0.0263656	-19.5919	3	20	0.15	155.162	0.0608751	3.06088	TRUE	FALSE	76	33	43.1765
F:\25-03-2022\20220324-SAMPLE BROTH-POS-00.d	2783	scanId=1574276		26.2378	444.264	1314.91	2	886.513	39	3661.94	R.IEANSLIK.D	IEANSLIK	DECOY_WP_012291832.1 MULTISPECIES: DNA topoisomerase (ATP-hydrolyzing) subunit B [Lysinibacillus]	168	175	0	886.512	0.000349373	0.394098	3	14	0.214286	214.906	0.0586865	3.05869	FALSE	TRUE	76	34	43.1765
F:\25-03-2022\20220324-SAMPLE BROTH-POS-00.d	2777	scanId=1570508		26.175	562.304	665.433	2	1122.59	37	2679.16	K.TNVTLTSM(oxidation of M)LK.G	TNVTLTSMLK	WP_012293320.1 MULTISPECIES: BMP family protein [Lysinibacillus]	281	290	0	1122.6	-0.00129666	-1.15505	3	18	0.166667	156.88	0.0585556	3.05856	TRUE	FALSE	77	34	43.1765
F:\25-03-2022\20220324-SAMPLE BROTH-POS-00.d	2808	scanId=1589181		26.4862	479.289	724.395	2	956.562	41	3414.22	M.ANITAQLVK.E	ANITAQLVK	WP_012293292.1 MULTISPECIES: translation elongation factor Ts [Lysinibacillus]	2	10	0	956.565	-0.00298593	-3.12152	3	16	0.1875	196.79	0.0576383	3.05764	TRUE	FALSE	78	34	43.1765
F:\25-03-2022\20220324-SAMPLE BROTH-POS-00.d	4637	scanId=2646734		44.1121	660.864	3699.9	2	1319.71	256	20091.7	-.MKIATIC[carbamidomethylation of C]LWGK.S	MKIATICLWGK	DECOY_WP_012294119.1 MULTISPECIES: class I SAM-dependent methyltransferase [Lysinibacillus]	1	11	1	1319.71	0.00345429	2.61747	3	20	0.15	1126.57	0.0560716	3.05607	FALSE	TRUE	78	35	43.1765
F:\25-03-2022\20220324-SAMPLE BROTH-POS-00.d	2875	scanId=1629458		27.1575	680.854	605.309	2	1359.69	51	3227.27	R.VGNDGVITIEESK.G	VGNDGVITIEESK	WP_068986766.1 MULTISPECIES: chaperonin GroEL [Lysinibacillus]	167	179	0	1359.69	0.00461922	3.39727	3	24	0.125	174.917	0.0541998	3.0542	TRUE	FALSE	79	35	43.1765
F:\25-03-2022\20220324-SAMPLE BROTH-POS-00.d	2246	scanId=1252061		20.8676	351.707	926.623	2	701.4	42	3163.73	K.IDIDVK.K	IDIDVK	DECOY_WP_012295293.1 MULTISPECIES: major capsid protein [Lysinibacillus]	298	303	0	701.396	0.0036243	5.16726	3	10	0.3	160.405	0.0507011	3.0507	FALSE	TRUE	79	36	43.1765
F:\25-03-2022\20220324-SAMPLE BROTH-POS-00.d	4060	scanId=2330940		38.8489	971.503	3719.63	2	1940.99	102	7522.34	R.WRNIWDEVIDVHMTK.I	WRNIWDEVIDVHMTK	WP_012295646.1 MULTISPECIES: septation ring formation regulator EzrA [Lysinibacillus]	67	81	1	1940.96	0.034114	17.5759	3	28	0.107143	376.028	0.0499882	3.04999	TRUE	FALSE	80	36	43.1765
F:\25-03-2022\20220324-SAMPLE BROTH-POS-00.d	3431	scanId=1959895		32.6648	806.954	516.495	2	1611.89	41	2661.03	R.VLNSTGALSLQEVPGK.L	VLNSTGALSLQEVPGK	WP_012293096.1 MULTISPECIES: dihydrolipoyl dehydrogenase [Lysinibacillus]	163	178	0	1611.88	0.0111437	6.91347	3	30	0.1	132.616	0.0498362	3.04984	TRUE	FALSE	81	36	43.1765
F:\25-03-2022\20220324-SAMPLE BROTH-POS-00.d	3075	scanId=1748298		29.1382	409.254	1237.68	2	816.494	45	4400.04	K.ELILTTK.D	ELILTTK	WP_012291949.1 MULTISPECIES: DUF4132 domain-containing protein [Lysinibacillus]	362	368	0	816.496	-0.00144562	-1.77052	3	12	0.25	218.935	0.0497576	3.04976	TRUE	FALSE	82	36	43.1765
F:\25-03-2022\20220324-SAMPLE BROTH-POS-00.d	2153	scanId=1197087		19.9513	438.233	1016.75	2	874.451	52	4054.64	K.LNVGEDTK.I	LNVGEDTK	WP_052323565.1 MULTISPECIES: stalk domain-containing protein [Lysinibacillus]	153	160	0	874.44	0.0112935	12.9152	3	14	0.214286	201.488	0.0496931	3.04969	TRUE	FALSE	83	36	43.1765
F:\25-03-2022\20220324-SAMPLE BROTH-POS-00.d	5210	scanId=2955219		49.2535	743.436	1684.68	2	1484.86	140	8956.7	R.LNDILSLIEISQK.I	LNDILSLIEISQK	DECOY_WP_139015353.1 MULTISPECIES: methyltransferase domain-containing protein [Lysinibacillus]	194	206	0	1484.85	0.0128832	8.67648	3	24	0.125	412.707	0.0460781	3.04608	FALSE	TRUE	83	37	43.3317
F:\25-03-2022\20220324-SAMPLE BROTH-POS-00.d	4467	scanId=2564958		42.7492	681.371	5512.36	2	1360.73	98	7112.48	K.GTNGAMTVLAIADK.G	GTNGAMTVLAIADK	WP_012292740.1 MULTISPECIES: class II fructose-bisphosphatase [Lysinibacillus]	97	110	0	1360.7	0.0250591	18.4163	3	26	0.115385	324.26	0.0455902	3.04559	TRUE	FALSE	84	37	43.3317
F:\25-03-2022\20220324-SAMPLE BROTH-POS-00.d	3427	scanId=1957679		32.6279	560.315	655.42	2	1118.62	48	3195.92	R.ALFEAGADVVK.V	ALFEAGADVVK	WP_012291837.1 MULTISPECIES: IMP dehydrogenase [Lysinibacillus]	289	299	0	1118.6	0.018807	16.813	3	20	0.15	143.193	0.0448047	3.0448	TRUE	FALSE	85	37	43.3317
F:\25-03-2022\20220324-SAMPLE BROTH-POS-00.d	4558	scanId=2614523		43.5752	649.864	1908.73	2	1297.71	123	9461.19	-.MPLTVTFSKFK.I	MPLTVTFSKFK	DECOY_WP_036161461.1 MULTISPECIES: DUF4179 domain-containing protein [Lysinibacillus]	1	11	1	1297.71	0.00354804	2.73408	3	20	0.15	419	0.0442862	3.04429	FALSE	TRUE	85	38	43.3665
F:\25-03-2022\20220324-SAMPLE BROTH-POS-00.d	2018	scanId=1117847		18.6306	523.785	613.116	2	1045.56	38	2567.94	R.SAGTSAQVLGR.E	SAGTSAQVLGR	WP_008181913.1 MULTISPECIES: 50S ribosomal protein L2 [Lysinibacillus]	157	167	0	1045.55	0.00374708	3.58383	3	20	0.15	104.205	0.0405793	3.04058	TRUE	FALSE	86	38	43.3665
F:\25-03-2022\20220324-SAMPLE BROTH-POS-00.d	3032	scanId=1722424		28.7069	466.277	1139.93	2	930.538	54	4162.74	R.LTSQIELK.T	LTSQIELK	WP_012295584.1 MULTISPECIES: FAD-binding oxidoreductase [Lysinibacillus]	244	251	0	930.539	-0.000115445	-0.124063	3	14	0.214286	161.935	0.0389011	3.0389	TRUE	FALSE	87	38	43.3665
F:\25-03-2022\20220324-SAMPLE BROTH-POS-00.d	3692	scanId=2111457		35.1908	628.343	1055.9	2	1254.67	74	5282.6	K.NLLDNKPGWAK.L	NLLDNKPGWAK	DECOY_WP_099805356.1 MULTISPECIES: polyprenyl synthetase family protein [Lysinibacillus]	86	96	0	1254.67	-0.00105499	-0.840851	3	20	0.15	198.257	0.0375301	3.03753	FALSE	TRUE	87	39	43.3665
F:\25-03-2022\20220324-SAMPLE BROTH-POS-00.d	3194	scanId=1818387		30.3063	673.87	1170.3	2	1345.73	58	3946.51	K.VGAPFVEGATVTAK.A	VGAPFVEGATVTAK	WP_010860053.1 MULTISPECIES: 50S ribosomal protein L21 [Lysinibacillus]	48	61	0	1345.72	0.00143764	1.0683	3	26	0.115385	140.314	0.035554	3.03555	TRUE	FALSE	88	39	43.3665
F:\25-03-2022\20220324-SAMPLE BROTH-POS-00.d	6783	scanId=3762324		62.7053	968.511	1626.59	2	1935.01	182	11117.5	K.GTVVEGDISIYTNLADIR.E	GTVVEGDISIYTNLADIR	DECOY_WP_036162219.1 MULTISPECIES: 4-hydroxyphenylacetate 3-monooxygenase, oxygenase component [Lysinibacillus]	450	467	0	1934.99	0.0133155	6.88143	3	34	0.0882353	381.033	0.0342734	3.03427	FALSE	TRUE	88	40	43.3665
F:\25-03-2022\20220324-SAMPLE BROTH-POS-00.d	2879	scanId=1631674		27.1944	622.84	846.143	2	1243.67	31	2030.98	K.GVNTAVVDISNR.A	GVNTAVVDISNR	WP_012293320.1 MULTISPECIES: BMP family protein [Lysinibacillus]	291	302	0	1243.65	0.013485	10.8431	3	22	0.136364	67.7821	0.0333741	3.03337	TRUE	FALSE	89	40	43.3665
F:\25-03-2022\20220324-SAMPLE BROTH-POS-00.d	4524	scanId=2597528		43.292	772.932	1391.9	2	1543.85	101	7085.84	R.EVVKDSNGETVVIR.K	EVVKDSNGETVVIR	DECOY_WP_012295839.1 MULTISPECIES: antibiotic biosynthesis monooxygenase [Lysinibacillus]	86	99	1	1543.82	0.0280824	18.1902	3	26	0.115385	232.591	0.0328248	3.03282	FALSE	TRUE	89	41	43.3665
F:\25-03-2022\20220324-SAMPLE BROTH-POS-00.d	4587	scanId=2627291		43.788	817.408	3139.59	2	1632.8	183	12714	R.LNQNAYGLSGGQQQR.I	LNQNAYGLSGGQQQR	WP_012295177.1 MULTISPECIES: phosphate ABC transporter ATP-binding protein PstB [Lysinibacillus]	167	181	0	1632.8	0.00503481	3.08355	3	28	0.107143	373.183	0.0293521	3.02935	TRUE	FALSE	90	41	43.3665
F:\25-03-2022\20220324-SAMPLE BROTH-POS-00.d	4790	scanId=2721520		45.3585	650.4	2787.68	2	1298.78	196	16996.7	K.AALATVKAVKNTL.-	AALATVKAVKNTL	WP_031416796.1 MULTISPECIES: heptaprenylglyceryl phosphate synthase [Lysinibacillus]	217	229	2	1298.79	-0.00756043	-5.82112	3	24	0.125	460.074	0.0270685	3.02707	TRUE	FALSE	91	41	43.3665
F:\25-03-2022\20220324-SAMPLE BROTH-POS-00.d	4693	scanId=2668198		44.4698	718.914	18712	2	1435.81	240	21508.3	K.NIFTFIPIGRMK.C	NIFTFIPIGRMK	DECOY_WP_012293015.1 MULTISPECIES: peptide chain release factor 3 [Lysinibacillus]	386	397	1	1435.8	0.0132189	9.20666	3	22	0.136364	563.678	0.0262075	3.02621	FALSE	TRUE	91	42	43.3665
F:\25-03-2022\20220324-SAMPLE BROTH-POS-00.d	3526	scanId=2013939		33.5655	505.767	992.259	2	1009.52	40	2968.71	K.LFFTPEEK.L	LFFTPEEK	WP_012294163.1 MULTISPECIES: oleate hydratase [Lysinibacillus]	153	160	0	1009.51	0.00705304	6.98658	3	14	0.214286	77.2025	0.0260054	3.02601	TRUE	FALSE	92	42	43.3665
F:\25-03-2022\20220324-SAMPLE BROTH-POS-00.d	4680	scanId=2663348		44.389	726.899	4943.12	2	1451.78	288	22237.8	K.GSITIDGTSLTLFK.V	GSITIDGTSLTLFK	WP_126659412.1 MULTISPECIES: riboflavin synthase [Lysinibacillus]	136	149	0	1451.79	-0.00458327	-3.15699	3	26	0.115385	563.971	0.0253608	3.02536	TRUE	FALSE	93	42	43.3665
F:\25-03-2022\20220324-SAMPLE BROTH-POS-00.d	4881	scanId=2773608		46.2267	1120.14	1739.65	2	2238.27	181	12110.2	K.RLGFLDESGATYKIEVSILK.D	RLGFLDESGATYKIEVSILK	WP_012293758.1 MULTISPECIES: class I SAM-dependent RNA methyltransferase [Lysinibacillus]	127	146	2	2238.23	0.0402606	17.9877	3	38	0.0789474	305.05	0.0251895	3.02519	TRUE	FALSE	94	42	43.3665
F:\25-03-2022\20220324-SAMPLE BROTH-POS-00.d	2168	scanId=1205234		20.0871	336.707	701.2	2	671.399	45	3348.53	K.IGDIVR.I	IGDIVR	WP_008181723.1 MULTISPECIES: 30S ribosomal protein S17 [Lysinibacillus]	57	62	0	671.397	0.00277892	4.13902	3	10	0.3	81.4564	0.024326	3.02433	TRUE	FALSE	95	42	43.3665
F:\25-03-2022\20220324-SAMPLE BROTH-POS-00.d	1844	scanId=1015647		16.9273	329.7	746.573	2	657.386	80	14866.5	R.LEAIGR.F	LEAIGR	DECOY_WP_012292678.1 MULTISPECIES: pyridoxal phosphate-dependent aminotransferase [Lysinibacillus]	316	321	0	657.381	0.0051479	7.83092	3	10	0.3	357.628	0.024056	3.02406	FALSE	TRUE	95	43	43.3665
F:\25-03-2022\20220324-SAMPLE BROTH-POS-00.d	1201	scanId=647394		10.7898	258.17	1309.22	2	514.325	42	4591.94	K.LQVR.T	LQVR	DECOY_WP_180276576.1 MULTISPECIES: RNA-binding transcriptional accessory protein [Lysinibacillus]	197	200	0	514.323	0.00245626	4.77572	3	6	0.5	109.086	0.0237559	3.02376	FALSE	TRUE	95	44	43.3665
F:\25-03-2022\20220324-SAMPLE BROTH-POS-00.d	3542	scanId=2023473		33.7244	572.323	755.493	2	1142.63	42	2957.13	R.LANISEDIIR.H	LANISEDIIR	WP_031415833.1 MULTISPECIES: 30S ribosomal protein S6 [Lysinibacillus]	78	87	0	1142.63	0.00143631	1.25702	3	18	0.166667	67.4411	0.0228063	3.02281	TRUE	FALSE	96	44	43.3665
F:\25-03-2022\20220324-SAMPLE BROTH-POS-00.d	4632	scanId=2645070		44.0844	638.848	4365.47	2	1275.68	235	21936.4	R.QPWILYGLMR.T	QPWILYGLMR	WP_012292031.1 MULTISPECIES: cytochrome ubiquinol oxidase subunit I [Lysinibacillus]	381	390	0	1275.68	0.00128861	1.01014	3	18	0.166667	479.149	0.0218427	3.02184	TRUE	FALSE	97	44	43.3665
F:\25-03-2022\20220324-SAMPLE BROTH-POS-00.d	4543	scanId=2607391		43.4564	927.023	1446.66	2	1852.03	137	8583	R.KTM(oxidation of M)DVIFTIFPFLHK.A	KTMDVIFTIFPFLHK	WP_012292132.1 MULTISPECIES: SDR family oxidoreductase [Lysinibacillus]	239	253	1	1852	0.0351633	18.9867	3	28	0.107143	183.173	0.0213413	3.02134	TRUE	FALSE	98	44	43.3665
F:\25-03-2022\20220324-SAMPLE BROTH-POS-00.d	6812	scanId=3777194		62.9531	968.514	2735.97	2	1935.01	217	13990.1	K.DVATREIVAYEVSTNLR.M	DVATREIVAYEVSTNLR	WP_085961712.1 MULTISPECIES: IS3 family transposase [Lysinibacillus]	307	323	1	1935.01	0.00644032	3.32832	3	32	0.09375	283.049	0.0202322	3.02023	TRUE	FALSE	99	44	43.3665
F:\25-03-2022\20220324-SAMPLE BROTH-POS-00.d	4613	scanId=2637281		43.9545	650.397	7234.57	2	1298.78	278	28091.1	K.VNLQRTKEIAK.A	VNLQRTKEIAK	WP_012295436.1 MULTISPECIES: indole-3-glycerol phosphate synthase TrpC [Lysinibacillus]	192	202	2	1298.77	0.0116352	8.95863	3	20	0.15	550.062	0.0195814	3.01958	TRUE	FALSE	100	44	43.3665
F:\25-03-2022\20220324-SAMPLE BROTH-POS-00.d	4674	scanId=2661060		44.3509	480.801	3946.01	2	959.586	182	20181.1	K.KLEKTITK.L	KLEKTITK	WP_025115432.1 MULTISPECIES: RsfA family transcriptional regulator [Lysinibacillus]	146	153	2	959.602	-0.0150347	-15.6676	3	14	0.214286	370.216	0.0183447	3.01834	TRUE	FALSE	101	44	43.3665
F:\25-03-2022\20220324-SAMPLE BROTH-POS-00.d	4552	scanId=2611824		43.5303	723.393	3734.03	2	1444.77	193	12905.5	R.VPVGKLEWENFK.F	VPVGKLEWENFK	DECOY_WP_036161675.1 MULTISPECIES: proline--tRNA ligase [Lysinibacillus]	141	152	1	1444.77	0.000699085	0.483872	3	22	0.136364	234.492	0.0181698	3.01817	FALSE	TRUE	101	45	44.3521
F:\25-03-2022\20220324-SAMPLE BROTH-POS-00.d	4636	scanId=2646401		44.1065	529.307	4699.52	2	1056.6	150	14049.9	K.LPSNADIVTK.G	LPSNADIVTK	DECOY_WP_012292998.1 MULTISPECIES: NEAT domain-containing protein [Lysinibacillus]	20	29	0	1056.58	0.0172278	16.3053	3	18	0.166667	242.645	0.0172701	3.01727	FALSE	TRUE	101	46	45.3377
F:\25-03-2022\20220324-SAMPLE BROTH-POS-00.d	4585	scanId=2626639		43.7772	608.848	8466.15	2	1215.68	180	21492.7	K.ILMGSPMVAGIK.A	ILMGSPMVAGIK	DECOY_WP_012295698.1 MULTISPECIES: DUF4479 domain-containing tRNA-binding protein [Lysinibacillus]	51	62	0	1215.67	0.00976516	8.03273	3	22	0.136364	362.574	0.0168697	3.01687	FALSE	TRUE	101	47	45.4238
F:\25-03-2022\20220324-SAMPLE BROTH-POS-00.d	4677	scanId=2662350		44.3724	650.397	33562.9	2	1298.78	229	22866.5	K.AALATVKAVKNTL.-	AALATVKAVKNTL	WP_031416796.1 MULTISPECIES: heptaprenylglyceryl phosphate synthase [Lysinibacillus]	217	229	2	1298.79	-0.0125179	-9.63808	3	24	0.125	385.114	0.0168418	3.01684	TRUE	FALSE	102	47	45.4238
F:\25-03-2022\20220324-SAMPLE BROTH-POS-00.d	4635	scanId=2646069		44.101	932.48	4033.23	2	1862.95	228	16837.9	K.EVDAIISVDTYKANVAR.A	EVDAIISVDTYKANVAR	WP_012291905.1 MULTISPECIES: dihydropteroate synthase [Lysinibacillus]	95	111	1	1862.97	-0.0287052	-15.4083	3	32	0.09375	282.5	0.0167777	3.01678	TRUE	FALSE	103	47	45.4238
F:\25-03-2022\20220324-SAMPLE BROTH-POS-00.d	4668	scanId=2659063		44.3176	760.461	7672.75	2	1518.91	357	34234	K.HKKHTEVLVTVTK.D	HKKHTEVLVTVTK	DECOY_WP_008181723.1 MULTISPECIES: 30S ribosomal protein S17 [Lysinibacillus]	56	68	2	1518.89	0.0199094	13.1079	3	24	0.125	542.306	0.0158411	3.01584	FALSE	TRUE	103	48	45.5066
F:\25-03-2022\20220324-SAMPLE BROTH-POS-00.d	4604	scanId=2633998		43.8998	630.862	6036.32	2	1259.71	239	23264.4	K.TALVTGSTRGIGK.A	TALVTGSTRGIGK	WP_217580989.1 MULTISPECIES: SDR family oxidoreductase [Lysinibacillus]	9	21	1	1259.72	-0.011129	-8.83449	3	24	0.125	361.809	0.0155521	3.01555	TRUE	FALSE	104	48	45.5066
F:\25-03-2022\20220324-SAMPLE BROTH-POS-00.d	4662	scanId=2656533		44.2754	631.363	10981.4	2	1260.71	244	23287.7	K.AVEKM(oxidation of M)ITLGKR.G	AVEKMITLGKR	WP_012296051.1 MULTISPECIES: 50S ribosomal protein L17 [Lysinibacillus]	43	53	2	1260.72	-0.0108216	-8.58363	3	20	0.15	337.558	0.0144951	3.0145	TRUE	FALSE	105	48	45.5066
F:\25-03-2022\20220324-SAMPLE BROTH-POS-00.d	4612	scanId=2636948		43.949	586.835	28195	2	1171.66	170	17227.8	M.LEKERELQK.A	LEKERELQK	DECOY_WP_036160352.1 MULTISPECIES: nucleoside triphosphate pyrophosphohydrolase [Lysinibacillus]	2	10	2	1171.66	-0.000105696	-0.0902104	3	16	0.1875	241.848	0.0140382	3.01404	FALSE	TRUE	105	49	46.086
F:\25-03-2022\20220324-SAMPLE BROTH-POS-00.d	4619	scanId=2639950		43.999	631.363	8290.45	2	1260.71	227	21543.2	K.STLVKARSM(oxidation of M)PR.T	STLVKARSMPR	DECOY_WP_036161327.1 MULTISPECIES: ABC transporter permease [Lysinibacillus]	163	173	2	1260.7	0.0146936	11.6551	3	20	0.15	275.061	0.0127679	3.01277	FALSE	TRUE	105	50	46.086
F:\25-03-2022\20220324-SAMPLE BROTH-POS-00.d	6868	scanId=3805936		63.4321	968.516	1408.29	2	1935.02	141	8351.51	R.LPAELWEIQNAFYLTK.Q	LPAELWEIQNAFYLTK	WP_080695199.1 MULTISPECIES: alpha-E domain-containing protein [Lysinibacillus]	104	119	0	1935.01	0.00384414	1.98662	3	30	0.1	105.946	0.0126858	3.01269	TRUE	FALSE	106	50	46.086
F:\25-03-2022\20220324-SAMPLE BROTH-POS-00.d	4640	scanId=2648011		44.1334	650.397	50385.6	2	1298.78	305	34649.3	K.VNLQRTKEIAK.A	VNLQRTKEIAK	WP_012295436.1 MULTISPECIES: indole-3-glycerol phosphate synthase TrpC [Lysinibacillus]	192	202	2	1298.77	0.0127975	9.8536	3	20	0.15	438.787	0.0126636	3.01266	TRUE	FALSE	107	50	46.086
F:\25-03-2022\20220324-SAMPLE BROTH-POS-00.d	4667	scanId=2658730		44.312	674.886	35294.6	2	1347.76	255	26392	K.VIEEALKFSQGK.A	VIEEALKFSQGK	WP_012291979.1 MULTISPECIES: methionine synthase [Lysinibacillus]	417	428	1	1347.74	0.0185465	13.7612	3	22	0.136364	311.189	0.0117911	3.01179	TRUE	FALSE	108	50	46.086
F:\25-03-2022\20220324-SAMPLE BROTH-POS-00.d	3461	scanId=1977244		32.9539	547.783	1613.95	2	1093.55	106	7964.22	K.MFAQTLDLR.M	MFAQTLDLR	DECOY_WP_058844752.1 MULTISPECIES: heat-inducible transcriptional repressor HrcA [Lysinibacillus]	7	15	0	1093.56	-0.00757746	-6.92917	3	16	0.1875	92.0413	0.0115569	3.01156	FALSE	TRUE	108	51	47.0077
F:\25-03-2022\20220324-SAMPLE BROTH-POS-00.d	4665	scanId=2657531		44.2921	677.367	8184	2	1352.72	227	19954.8	K.KELSDVHEATPK.G	KELSDVHEATPK	DECOY_WP_054549827.1 MULTISPECIES: MFS transporter [Lysinibacillus]	3	14	1	1352.69	0.0259193	19.1613	3	22	0.136364	212.826	0.0106654	3.01067	FALSE	TRUE	108	52	47.9295
F:\25-03-2022\20220324-SAMPLE BROTH-POS-00.d	4644	scanId=2649786		44.163	696.901	10796.5	2	1391.79	244	22924.9	R.KVRNPRPNIGNK.E	KVRNPRPNIGNK	DECOY_WP_036161579.1 MULTISPECIES: methyl-accepting chemotaxis protein [Lysinibacillus]	571	582	2	1391.81	-0.0237628	-17.0733	3	22	0.136364	243.228	0.0106098	3.01061	FALSE	TRUE	108	53	48.8512
F:\25-03-2022\20220324-SAMPLE BROTH-POS-00.d	4564	scanId=2617783		43.6296	564.822	7629.29	2	1127.63	170	17720.8	R.VTPTRQLWK.Y	VTPTRQLWK	DECOY_WP_081112813.1 MULTISPECIES: IS3 family transposase [Lysinibacillus]	56	64	1	1127.65	-0.0151646	-13.448	3	16	0.1875	185.71	0.0104798	3.01048	FALSE	TRUE	108	54	49.7729
F:\25-03-2022\20220324-SAMPLE BROTH-POS-00.d	4618	scanId=2639617		43.9935	652.872	7721.72	2	1303.73	216	23486.8	K.KLDVGSLFQAVK.S	KLDVGSLFQAVK	DECOY_WP_012292605.1 MULTISPECIES: glycerol-3-phosphate acyltransferase [Lysinibacillus]	179	190	1	1303.75	-0.0197572	-15.1541	3	22	0.136364	244.407	0.0104062	3.01041	FALSE	TRUE	108	55	50.6946
F:\25-03-2022\20220324-SAMPLE BROTH-POS-00.d	4628	scanId=2643159		44.0525	1038.04	4207.66	2	2074.06	230	13054.8	K.RHALPHDIPVM(oxidation of M)IFLEDR.W	RHALPHDIPVMIFLEDR	DECOY_WP_031419566.1 MULTISPECIES: LysR family transcriptional regulator [Lysinibacillus]	125	141	1	2074.08	-0.0191162	-9.2167	3	32	0.09375	131.603	0.0100808	3.01008	FALSE	TRUE	108	56	51.1428
F:\25-03-2022\20220324-SAMPLE BROTH-POS-00.d	4634	scanId=2645736		44.0955	674.887	6198.36	2	1347.76	261	24947	K.VGRDVPNITHIK.E	VGRDVPNITHIK	WP_012291919.1 MULTISPECIES: 4-hydroxy-tetrahydrodipicolinate synthase [Lysinibacillus]	153	164	1	1347.76	-0.00204861	-1.52001	3	22	0.136364	186.05	0.00745779	3.00746	TRUE	FALSE	109	56	51.1428
F:\25-03-2022\20220324-SAMPLE BROTH-POS-00.d	4570	scanId=2619780		43.6629	1287.65	1402.43	2	2573.29	175	10485.9	-.MLLM(oxidation of M)RLFQEFHVGAERPVQEK.S	MLLMRLFQEFHVGAERPVQEK	DECOY_WP_036160536.1 MULTISPECIES: pyridoxamine kinase [Lysinibacillus]	1	21	1	2573.32	-0.0318577	-12.38	3	40	0.075	71.8125	0.00684845	3.00685	FALSE	TRUE	109	57	52.0561
F:\25-03-2022\20220324-SAMPLE BROTH-POS-00.d	4877	scanId=2771392		46.1897	649.911	7007.85	2	1297.81	283	30988.1	R.IPQIFRQRLK.R	IPQIFRQRLK	DECOY_WP_038509878.1 MULTISPECIES: DnaD domain protein [Lysinibacillus]	311	320	2	1297.8	0.0101308	7.80617	3	18	0.166667	207.088	0.00668284	3.00668	FALSE	TRUE	109	58	52.9693
F:\25-03-2022\20220324-SAMPLE BROTH-POS-00.d	4650	scanId=2652501		44.2082	663.893	3970.48	2	1325.77	238	18514.2	K.IEGLLQLDNLAK.S	IEGLLQLDNLAK	DECOY_WP_012292862.1 MULTISPECIES: Fic family protein [Lysinibacillus]	16	27	0	1325.76	0.0167893	12.664	3	22	0.136364	122.971	0.00664195	3.00664	FALSE	TRUE	109	59	53.8826
F:\25-03-2022\20220324-SAMPLE BROTH-POS-00.d	4811	scanId=2732767		45.546	720.9	2889.08	2	1439.79	201	17582.6	K.YTLAIAEKRTFK.E	YTLAIAEKRTFK	DECOY_WP_012293250.1 MULTISPECIES: EscU/YscU/HrcU family type III secretion system export apparatus switch protein [Lysinibacillus]	86	97	2	1439.81	-0.0284792	-19.7798	3	22	0.136364	101.365	0.00576507	3.00577	FALSE	TRUE	109	60	54.2977
F:\25-03-2022\20220324-SAMPLE BROTH-POS-00.d	4702	scanId=2671536		44.5255	826.5	4424.64	2	1650.99	330	26616.3	K.LLNELLPQLTLEQK.I	LLNELLPQLTLEQK	WP_036220092.1 MULTISPECIES: assimilatory sulfite reductase (NADPH) flavoprotein subunit [Lysinibacillus]	17	30	0	1650.96	0.0301889	18.2857	3	26	0.115385	148.109	0.00556458	3.00556	TRUE	FALSE	110	60	54.2977
F:\25-03-2022\20220324-SAMPLE BROTH-POS-00.d	4740	scanId=2691138		44.8522	689.911	4215.65	2	1377.81	220	18075.8	K.KVSKNQIVFGMK.F	KVSKNQIVFGMK	DECOY_WP_031419289.1 MULTISPECIES: polysaccharide deacetylase family protein [Lysinibacillus]	32	43	2	1377.78	0.0269578	19.5661	3	22	0.136364	85.57	0.00473397	3.00473	FALSE	TRUE	110	61	55.2027
F:\25-03-2022\20220324-SAMPLE BROTH-POS-00.d	4861	scanId=2762192		46.0364	629.387	5726.24	2	1256.76	262	29464.1	K.KLAADKSIANVK.N	KLAADKSIANVK	DECOY_WP_036160386.1 MULTISPECIES: S-layer homology domain-containing protein [Lysinibacillus]	335	346	2	1256.75	0.0133036	10.5858	3	22	0.136364	137.177	0.00465574	3.00466	FALSE	TRUE	110	62	56.1076
F:\25-03-2022\20220324-SAMPLE BROTH-POS-00.d	4659	scanId=2655553		44.2591	738.45	7600.25	2	1474.89	435	43567.5	K.AVTLVPAHTSPVKR.S	AVTLVPAHTSPVKR	DECOY_WP_051563308.1 MULTISPECIES: amidohydrolase [Lysinibacillus]	155	168	1	1474.86	0.0231496	15.6961	3	26	0.115385	190.035	0.00436185	3.00436	FALSE	TRUE	110	63	56.499
F:\25-03-2022\20220324-SAMPLE BROTH-POS-00.d	4670	scanId=2659729		44.3287	740.923	7928.03	2	1479.83	344	30619.1	K.FRELYIEILER.W	FRELYIEILER	WP_012292249.1 MULTISPECIES: DUF6241 domain-containing protein [Lysinibacillus]	113	123	1	1479.81	0.0231326	15.6321	3	20	0.15	117.825	0.0038481	3.00385	TRUE	FALSE	111	63	56.499
F:\25-03-2022\20220324-SAMPLE BROTH-POS-00.d	3564	scanId=2035220		33.9202	705.386	630.26	2	1408.76	40	3370.01	M.EVSIIYPYLGQK.G	EVSIIYPYLGQK	DECOY_WP_012293222.1 MULTISPECIES: DAK2 domain-containing protein [Lysinibacillus]	2	13	0	1408.76	-0.00258319	-1.83366	2	22	0.0909091	954.422	0.28321	2.28321	FALSE	TRUE	111	64	56.5218
F:\25-03-2022\20220324-SAMPLE BROTH-POS-00.d	2001	scanId=1108199		18.4699	407.229	879.655	2	812.444	31	2601.28	R.ALEEPVR.Q	ALEEPVR	WP_126659346.1 MULTISPECIES: chaperonin GroEL [Lysinibacillus]	445	451	0	812.439	0.00514302	6.33035	2	12	0.166667	499.554	0.192042	2.19204	TRUE	FALSE	112	64	56.5218
F:\25-03-2022\20220324-SAMPLE BROTH-POS-00.d	476	scanId=254661		4.24422	291.154	1212.69	2	580.293	51	5817.55	K.ASEFK.D	ASEFK	DECOY_WP_115673784.1 MULTISPECIES: carbamoyl-phosphate synthase large subunit [Lysinibacillus]	699	703	0	580.286	0.00771851	13.3012	2	8	0.25	1109.49	0.190715	2.19071	FALSE	TRUE	112	65	56.5218
F:\25-03-2022\20220324-SAMPLE BROTH-POS-00.d	1530	scanId=833505		13.8916	561.298	569.556	2	1120.58	37	2756.75	K.KELFQAEEK.L	KELFQAEEK	WP_036162184.1 MULTISPECIES: DUF6148 family protein [Lysinibacillus]	52	60	1	1120.58	0.00455681	4.06649	2	16	0.125	479.044	0.173772	2.17377	TRUE	FALSE	113	65	56.5218
F:\25-03-2022\20220324-SAMPLE BROTH-POS-00.d	4020	scanId=2308390		38.473	504.258	788.027	2	1006.5	31	2274.81	K.QTREMSQK.V	QTREMSQK	DECOY_WP_031419316.1 MULTISPECIES: endopeptidase La [Lysinibacillus]	552	559	1	1006.49	0.0140545	13.9639	2	14	0.142857	393.393	0.172934	2.17293	FALSE	TRUE	113	66	56.5218
F:\25-03-2022\20220324-SAMPLE BROTH-POS-00.d	2377	scanId=1329368		22.156	506.789	572.071	2	1011.56	35	2431.61	K.VPQTFKHR.L	VPQTFKHR	WP_036161794.1 MULTISPECIES: oxalate decarboxylase family bicupin [Lysinibacillus]	227	234	1	1011.56	0.00248549	2.45708	2	14	0.142857	393.508	0.16183	2.16183	TRUE	FALSE	114	66	56.5218
F:\25-03-2022\20220324-SAMPLE BROTH-POS-00.d	2589	scanId=1457590		24.293	703.854	465.002	2	1405.69	23	1765.43	R.RM(oxidation of M)YLEFFKEK.G	RMYLEFFKEK	WP_115674134.1 MULTISPECIES: alanine--tRNA ligase [Lysinibacillus]	8	17	2	1405.71	-0.0127356	-9.05995	2	18	0.111111	274.511	0.155492	2.15549	TRUE	FALSE	115	66	56.5218
F:\25-03-2022\20220324-SAMPLE BROTH-POS-00.d	1960	scanId=1083647		18.0606	576.78	513.711	2	1151.55	35	2699.21	R.VADYQLNSDK.V	VADYQLNSDK	DECOY_WP_036162357.1 MULTISPECIES: alanine racemase [Lysinibacillus]	153	162	0	1151.55	-0.000492831	-0.427974	2	18	0.111111	417.929	0.154834	2.15483	FALSE	TRUE	115	67	56.5218
F:\25-03-2022\20220324-SAMPLE BROTH-POS-00.d	2235	scanId=1245409		20.7567	445.253	693.316	2	888.491	29	2560.09	K.KVTDMPAK.R	KVTDMPAK	WP_036161424.1 MULTISPECIES: DnaD domain protein [Lysinibacillus]	218	225	1	888.474	0.0170131	19.1487	2	14	0.142857	378.171	0.147718	2.14772	TRUE	FALSE	116	67	56.5218
F:\25-03-2022\20220324-SAMPLE BROTH-POS-00.d	1373	scanId=743869		12.3977	347.68	654.365	2	693.345	40	3140.95	K.EKFDR.M	EKFDR	WP_206700916.1 MULTISPECIES: ribosome biogenesis GTPase YlqF [Lysinibacillus]	97	101	1	693.345	0.000104785	0.15113	2	8	0.25	433.694	0.138077	2.13808	TRUE	FALSE	117	67	56.5218
F:\25-03-2022\20220324-SAMPLE BROTH-POS-00.d	3259	scanId=1858115		30.9685	658.854	677.49	2	1315.69	36	2725.72	K.AIQTELGDREGK.T	AIQTELGDREGK	WP_031419316.1 MULTISPECIES: endopeptidase La [Lysinibacillus]	235	246	1	1315.67	0.0205377	15.61	2	22	0.0909091	372.354	0.136608	2.13661	TRUE	FALSE	118	67	56.5218
F:\25-03-2022\20220324-SAMPLE BROTH-POS-00.d	2989	scanId=1697386		28.2896	606.838	1582.61	2	1211.66	29	1867.76	K.QVAAIEKYYK.N	QVAAIEKYYK	DECOY_WP_241744842.1 MULTISPECIES: S-layer homology domain-containing protein [Lysinibacillus]	259	268	1	1211.66	0.00638814	5.27224	2	18	0.111111	248.847	0.133233	2.13323	FALSE	TRUE	118	68	56.7658
F:\25-03-2022\20220324-SAMPLE BROTH-POS-00.d	2666	scanId=1504349		25.0724	597.813	645.47	2	1193.61	39	2620.31	R.NKSGQTETTTK.E	NKSGQTETTTK	DECOY_WP_012292894.1 MULTISPECIES: ComF family protein [Lysinibacillus]	62	72	1	1193.59	0.0222133	18.6105	2	20	0.1	338.132	0.129043	2.12904	FALSE	TRUE	118	69	56.7658
F:\25-03-2022\20220324-SAMPLE BROTH-POS-00.d	1273	scanId=685993		11.4331	632.314	1338.66	2	1262.61	46	2804.42	R.TFNGVSVGPEEK.K	TFNGVSVGPEEK	WP_012292313.1 MULTISPECIES: acyl-CoA dehydrogenase family protein [Lysinibacillus]	212	223	0	1262.61	-0.000515549	-0.408319	2	22	0.0909091	337.74	0.120431	2.12043	TRUE	FALSE	119	69	56.7658
F:\25-03-2022\20220324-SAMPLE BROTH-POS-00.d	4347	scanId=2496980		41.6162	979.003	700.881	2	1955.99	33	2729.36	K.THFIHLVEYNKELWK.N	THFIHLVEYNKELWK	WP_217581165.1 MULTISPECIES: GrpB family protein [Lysinibacillus]	108	122	1	1956.03	-0.0333842	-17.0674	2	28	0.0714286	325.709	0.119335	2.11934	TRUE	FALSE	120	69	56.7658
F:\25-03-2022\20220324-SAMPLE BROTH-POS-00.d	1335	scanId=721804		12.0299	788.881	322.32	2	1575.75	26	1814.35	K.YSPEQLADVAENIK.A	YSPEQLADVAENIK	WP_012292187.1 MULTISPECIES: HIT family protein [Lysinibacillus]	121	134	0	1575.78	-0.0309939	-19.6689	2	26	0.0769231	214.04	0.117971	2.11797	TRUE	FALSE	121	69	56.7658
F:\25-03-2022\20220324-SAMPLE BROTH-POS-00.d	2538	scanId=1428992		23.8164	479.292	602.138	2	956.57	36	2669.81	R.KELNAKVR.N	KELNAKVR	DECOY_WP_031416728.1 MULTISPECIES: transcription termination/antitermination protein NusG [Lysinibacillus]	155	162	2	956.577	-0.00713248	-7.45626	2	14	0.142857	299.398	0.112142	2.11214	FALSE	TRUE	121	70	57.5885
F:\25-03-2022\20220324-SAMPLE BROTH-POS-00.d	3705	scanId=2119495		35.3248	686.866	521.942	2	1371.72	28	2004.36	K.NQIGFYGTGIFR.N	NQIGFYGTGIFR	DECOY_WP_036161571.1 MULTISPECIES: class I SAM-dependent rRNA methyltransferase [Lysinibacillus]	339	350	0	1371.69	0.0245376	17.8886	2	22	0.0909091	221.02	0.11027	2.11027	FALSE	TRUE	121	71	58.4112
F:\25-03-2022\20220324-SAMPLE BROTH-POS-00.d	1488	scanId=809174		13.4861	322.693	488.41	2	643.372	25	1984.87	R.INLER.D	INLER	DECOY_WP_066037066.1 MULTISPECIES: coproporphyrinogen III oxidase [Lysinibacillus]	417	421	0	643.365	0.00668886	10.3967	2	8	0.25	217.292	0.109474	2.10947	FALSE	TRUE	121	72	58.7483
F:\25-03-2022\20220324-SAMPLE BROTH-POS-00.d	2682	scanId=1513767		25.2293	421.76	5153.84	2	841.505	65	5280.12	K.GLIQQKR.F	GLIQQKR	WP_031418973.1 MULTISPECIES: ATP-dependent DNA helicase RecG [Lysinibacillus]	148	154	1	841.513	-0.00830647	-9.87087	2	12	0.166667	560.038	0.106065	2.10607	TRUE	FALSE	122	72	58.7483
F:\25-03-2022\20220324-SAMPLE BROTH-POS-00.d	3661	scanId=2093505		34.8916	732.895	374.587	2	1463.78	40	2169.03	K.LYLEVVAAGWSTR.N	LYLEVVAAGWSTR	DECOY_WP_012292176.1 MULTISPECIES: DNA repair exonuclease [Lysinibacillus]	114	126	0	1463.78	-0.00217323	-1.48467	2	24	0.0833333	224.754	0.103619	2.10362	FALSE	TRUE	122	73	59.08
F:\25-03-2022\20220324-SAMPLE BROTH-POS-00.d	2860	scanId=1621092		27.0181	622.828	604.053	2	1243.64	46	3117.07	K.GVNTAVVDISNR.A	GVNTAVVDISNR	WP_012293320.1 MULTISPECIES: BMP family protein [Lysinibacillus]	291	302	0	1243.65	-0.00982989	-7.90406	2	22	0.0909091	315.759	0.1013	2.1013	TRUE	FALSE	123	73	59.08
F:\25-03-2022\20220324-SAMPLE BROTH-POS-00.d	2473	scanId=1388826		23.147	492.78	725.583	2	983.546	34	2232.29	K.LTTGEKHAK.K	LTTGEKHAK	DECOY_WP_012294038.1 MULTISPECIES: class II fumarate hydratase [Lysinibacillus]	32	40	1	983.54	0.00610444	6.2066	2	16	0.125	222.246	0.0995597	2.09956	FALSE	TRUE	123	74	59.2535
F:\25-03-2022\20220324-SAMPLE BROTH-POS-00.d	2657	scanId=1498863		24.9809	421.758	2578.36	2	841.502	51	3825.41	K.GLIQQKR.F	GLIQQKR	WP_031418973.1 MULTISPECIES: ATP-dependent DNA helicase RecG [Lysinibacillus]	148	154	1	841.513	-0.011585	-13.7669	2	12	0.166667	378.305	0.0988926	2.09889	TRUE	FALSE	124	74	59.2535
F:\25-03-2022\20220324-SAMPLE BROTH-POS-00.d	2014	scanId=1115464		18.5909	457.775	556.578	2	913.536	37	2780.91	R.ITEIITPK.A	ITEIITPK	DECOY_WP_012295951.1 MULTISPECIES: response regulator transcription factor [Lysinibacillus]	11	18	0	913.548	-0.0123278	-13.4944	2	14	0.142857	274.7	0.0987808	2.09878	FALSE	TRUE	124	75	59.2535
F:\25-03-2022\20220324-SAMPLE BROTH-POS-00.d	1128	scanId=604882		10.0812	699.359	344.51	2	1396.7	25	1805.05	K.GM(oxidation of M)NFKLHHNRK.I	GMNFKLHHNRK	WP_089984933.1 MULTISPECIES: Mur ligase family protein [Lysinibacillus]	261	271	2	1396.71	-0.0106117	-7.59763	2	20	0.1	177.501	0.0983359	2.09834	TRUE	FALSE	125	75	59.2535
F:\25-03-2022\20220324-SAMPLE BROTH-POS-00.d	2729	scanId=1543079		25.7178	493.785	753.097	2	985.556	27	1806.4	K.SGVIALDSPK.F	SGVIALDSPK	WP_012293136.1 MULTISPECIES: glycerophosphodiester phosphodiesterase [Lysinibacillus]	242	251	0	985.544	0.0112536	11.4187	2	18	0.111111	177.38	0.0981954	2.0982	TRUE	FALSE	126	75	59.2535
F:\25-03-2022\20220324-SAMPLE BROTH-POS-00.d	2265	scanId=1263697		21.0615	443.265	668.869	2	884.516	48	3701.53	K.KGDTVLPR.K	KGDTVLPR	DECOY_WP_031417717.1 MULTISPECIES: arsenate reductase family protein [Lysinibacillus]	18	25	1	884.508	0.00775632	8.76908	2	14	0.142857	357.231	0.096509	2.09651	FALSE	TRUE	126	76	59.883
F:\25-03-2022\20220324-SAMPLE BROTH-POS-00.d	3674	scanId=2100153		35.0024	925.459	452.248	2	1848.9	36	1769.14	K.KLLRYEEYQESYTK.Q	KLLRYEEYQESYTK	DECOY_WP_107922152.1 MULTISPECIES: DNA repair protein RecN [Lysinibacillus]	391	404	2	1848.93	-0.022876	-12.3726	2	26	0.0769231	166.057	0.093863	2.09386	FALSE	TRUE	126	77	59.883
F:\25-03-2022\20220324-SAMPLE BROTH-POS-00.d	2829	scanId=1602588		26.7097	490.243	965.021	2	978.471	41	2464.51	K.NSFLQNEK.K	NSFLQNEK	WP_197150523.1 MULTISPECIES: penicillin-binding protein 1A [Lysinibacillus]	160	167	0	978.477	-0.00575651	-5.88314	2	14	0.142857	231.143	0.0937884	2.09379	TRUE	FALSE	127	77	59.883
F:\25-03-2022\20220324-SAMPLE BROTH-POS-00.d	2802	scanId=1585412		26.4234	514.779	1033.69	2	1027.54	33	2666.29	R.IEEKVEPGK.G	IEEKVEPGK	WP_031416837.1 MULTISPECIES: SPASM domain-containing protein [Lysinibacillus]	178	186	1	1027.55	-0.0123508	-12.0196	2	16	0.125	248.317	0.0931321	2.09313	TRUE	FALSE	128	77	59.883
F:\25-03-2022\20220324-SAMPLE BROTH-POS-00.d	4443	scanId=2552465		42.541	1026.51	1029.8	2	2051.01	55	4065.28	K.SGIPEMRVEVNYENKMR.H	SGIPEMRVEVNYENKMR	DECOY_WP_012293015.1 MULTISPECIES: peptide chain release factor 3 [Lysinibacillus]	59	75	2	2050.99	0.0161237	7.86139	2	32	0.0625	370.396	0.0911119	2.09111	FALSE	TRUE	128	78	60.0203
F:\25-03-2022\20220324-SAMPLE BROTH-POS-00.d	2378	scanId=1329701		22.1615	428.752	444.873	2	855.49	40	3048.3	K.GNQIVAVR.D	GNQIVAVR	DECOY_WP_012293992.1 MULTISPECIES: ABC transporter ATP-binding protein [Lysinibacillus]	98	105	0	855.493	-0.00248219	-2.90148	2	14	0.142857	277.256	0.0909541	2.09095	FALSE	TRUE	128	79	60.0203
F:\25-03-2022\20220324-SAMPLE BROTH-POS-00.d	2998	scanId=1701984		28.3663	415.755	1266.47	2	829.495	48	3913.28	K.ELASVIAK.E	ELASVIAK	WP_036160656.1 MULTISPECIES: FtsX-like permease family protein [Lysinibacillus]	542	549	0	829.491	0.00390803	4.71135	2	14	0.142857	354.571	0.0906072	2.09061	TRUE	FALSE	129	79	60.0203
F:\25-03-2022\20220324-SAMPLE BROTH-POS-00.d	2816	scanId=1593948		26.5657	498.742	972.532	2	995.47	42	3421.51	R.KFQDAMEK.L	KFQDAMEK	WP_012292176.1 MULTISPECIES: DNA repair exonuclease [Lysinibacillus]	74	81	1	995.475	-0.00451677	-4.53731	2	14	0.142857	309.629	0.090495	2.0905	TRUE	FALSE	130	79	60.0203
F:\25-03-2022\20220324-SAMPLE BROTH-POS-00.d	2210	scanId=1230557		20.5092	660.849	890.58	2	1319.68	34	2238.36	R.KGDVMM(oxidation of M)KNILR.T	KGDVMMKNILR	DECOY_WP_155593039.1 MULTISPECIES: 30S ribosomal protein S7 [Lysinibacillus]	123	133	2	1319.71	-0.0219829	-16.6574	2	20	0.1	202.17	0.0903208	2.09032	FALSE	TRUE	130	80	60.0203
F:\25-03-2022\20220324-SAMPLE BROTH-POS-00.d	2554	scanId=1437524		23.9586	623.821	1261.14	2	1245.63	48	3273.2	K.VIM(oxidation of M)ASKHSTEK.I	VIMASKHSTEK	DECOY_WP_012292623.1 MULTISPECIES: saccharopine dehydrogenase NADP-binding domain-containing protein [Lysinibacillus]	4	14	1	1245.64	-0.0108367	-8.69972	2	20	0.1	289.56	0.0884639	2.08846	FALSE	TRUE	130	81	60.0203
F:\25-03-2022\20220324-SAMPLE BROTH-POS-00.d	1692	scanId=926865		15.4476	515.767	779.478	2	1029.52	43	3458.34	K.VSYSGINYK.D	VSYSGINYK	WP_036161093.1 MULTISPECIES: acryloyl-CoA reductase [Lysinibacillus]	38	46	0	1029.51	0.00700457	6.80377	2	16	0.125	305.884	0.0884482	2.08845	TRUE	FALSE	131	81	60.0203
F:\25-03-2022\20220324-SAMPLE BROTH-POS-00.d	3304	scanId=1884934		31.4154	638.842	686.305	2	1275.67	34	1974.93	R.ALALNQSEGFVK.L	ALALNQSEGFVK	WP_012293096.1 MULTISPECIES: dihydrolipoyl dehydrogenase [Lysinibacillus]	388	399	0	1275.68	-0.0132119	-10.3568	2	22	0.0909091	172.287	0.087237	2.08724	TRUE	FALSE	132	81	60.0203
F:\25-03-2022\20220324-SAMPLE BROTH-POS-00.d	4221	scanId=2423372		40.3894	719.366	656.841	2	1436.72	44	2922.62	R.KRPGMYIGSTDGR.G	KRPGMYIGSTDGR	WP_031416030.1 MULTISPECIES: DNA topoisomerase IV subunit B [Lysinibacillus]	26	38	1	1436.72	-0.00274732	-1.91222	2	24	0.0833333	253.489	0.0867333	2.08673	TRUE	FALSE	133	81	60.0203
F:\25-03-2022\20220324-SAMPLE BROTH-POS-00.d	2546	scanId=1432706		23.8783	404.192	648.551	2	806.369	32	2687.09	R.SGRDMNK.V	SGRDMNK	WP_012296086.1 MULTISPECIES: 23S rRNA (guanosine(2251)-2'-O)-methyltransferase RlmB [Lysinibacillus]	21	27	1	806.37	-0.00113474	-1.40722	2	12	0.166667	232.115	0.0863816	2.08638	TRUE	FALSE	134	81	60.0203
F:\25-03-2022\20220324-SAMPLE BROTH-POS-00.d	3982	scanId=2285285		38.0879	729.399	686.756	2	1456.78	45	3205.09	R.SRNGKGELIQISR.E	SRNGKGELIQISR	DECOY_WP_036160791.1 MULTISPECIES: tyrosine-type recombinase/integrase [Lysinibacillus]	113	125	2	1456.81	-0.0272244	-18.6877	2	24	0.0833333	275.534	0.0859676	2.08597	FALSE	TRUE	134	82	60.0203
F:\25-03-2022\20220324-SAMPLE BROTH-POS-00.d	1711	scanId=937562		15.6259	351.215	892.017	2	700.415	34	2532.68	R.VVTINR.V	VVTINR	WP_008181711.1 MULTISPECIES: 30S ribosomal protein S5 [Lysinibacillus]	16	21	0	700.423	-0.00826504	-11.8001	2	10	0.2	216.199	0.0853637	2.08536	TRUE	FALSE	135	82	60.0203
F:\25-03-2022\20220324-SAMPLE BROTH-POS-00.d	3254	scanId=1855397		30.9231	580.311	566.38	2	1158.61	37	2491.73	K.KKQQDQQEK.Q	KKQQDQQEK	WP_012293288.1 MULTISPECIES: hypothetical protein [Lysinibacillus]	79	87	2	1158.6	0.00801634	6.91899	2	16	0.125	206.026	0.0826841	2.08268	TRUE	FALSE	136	82	60.0203
F:\25-03-2022\20220324-SAMPLE BROTH-POS-00.d	4249	scanId=2440929		40.682	744.897	1109.03	2	1487.78	61	5092.48	K.IVETENKSQEALK.R	IVETENKSQEALK	DECOY_WP_036160608.1 MULTISPECIES: methyl-accepting chemotaxis protein [Lysinibacillus]	131	143	1	1487.78	-0.00354297	-2.38137	2	24	0.0833333	416.838	0.0818537	2.08185	FALSE	TRUE	136	83	60.5931
F:\25-03-2022\20220324-SAMPLE BROTH-POS-00.d	4017	scanId=2306506		38.4416	1171.62	621.025	2	2341.23	35	1958.87	K.VGM(oxidation of M)LRAPLVRTDNLVLC[carbamidomethylation of C]DGAR.L	VGMLRAPLVRTDNLVLCDGAR	DECOY_WP_036119217.1 MULTISPECIES: tRNA preQ1(34) S-adenosylmethionine ribosyltransferase-isomerase QueA [Lysinibacillus]	277	297	2	2341.24	-0.00873741	-3.73197	2	40	0.05	159.944	0.0816514	2.08165	FALSE	TRUE	136	84	60.5931
F:\25-03-2022\20220324-SAMPLE BROTH-POS-00.d	4114	scanId=2361537		39.3588	359.714	5007	2	717.413	51	5007.26	-.MARGRK.F	MARGRK	WP_031418674.1 MULTISPECIES: TetR/AcrR family transcriptional regulator [Lysinibacillus]	1	6	2	717.407	0.00599372	8.3547	2	10	0.2	407.773	0.0814363	2.08144	TRUE	FALSE	137	84	60.5931
F:\25-03-2022\20220324-SAMPLE BROTH-POS-00.d	3042	scanId=1728627		28.8103	571.333	942.229	2	1140.65	63	5436.39	K.LPVVEESQIK.E	LPVVEESQIK	WP_227256839.1 MULTISPECIES: hypothetical protein [Lysinibacillus]	13	22	0	1140.64	0.0119667	10.4912	2	18	0.111111	438.52	0.0806638	2.08066	TRUE	FALSE	138	84	60.5931
F:\25-03-2022\20220324-SAMPLE BROTH-POS-00.d	4173	scanId=2395166		39.9193	1040.05	491.469	2	2078.08	51	2927.47	M.SKDDILSNALLMFELTIR.N	SKDDILSNALLMFELTIR	DECOY_WP_217581670.1 MULTISPECIES: PucR family transcriptional regulator ligand-binding domain-containing protein [Lysinibacillus]	2	19	1	2078.11	-0.0318136	-15.3089	2	34	0.0588235	235.629	0.0804889	2.08049	FALSE	TRUE	138	85	60.9464
F:\25-03-2022\20220324-SAMPLE BROTH-POS-00.d	4325	scanId=2483793		41.3964	1106.06	767.427	2	2210.1	58	3433.37	K.QGQQEIIRHITADVDAAMSK.E	QGQQEIIRHITADVDAAMSK	DECOY_WP_036220092.1 MULTISPECIES: assimilatory sulfite reductase (NADPH) flavoprotein subunit [Lysinibacillus]	26	45	1	2210.11	-0.015786	-7.14261	2	38	0.0526316	271.465	0.0790667	2.07907	FALSE	TRUE	138	86	60.9464
F:\25-03-2022\20220324-SAMPLE BROTH-POS-00.d	4374	scanId=2512932		41.8821	709.383	1279.84	2	1416.75	41	2912.49	R.VLQFKPGLLC[carbamidomethylation of C]DK.A	VLQFKPGLLCDK	WP_205447410.1 MULTISPECIES: aminotransferase class III-fold pyridoxal phosphate-dependent enzyme [Lysinibacillus]	384	395	0	1416.78	-0.0283161	-19.9863	2	22	0.0909091	229.698	0.0788666	2.07887	TRUE	FALSE	139	86	60.9464
F:\25-03-2022\20220324-SAMPLE BROTH-POS-00.d	2984	scanId=1694118		28.2352	529.791	756.001	2	1057.57	44	2682.19	R.LQEEKQQR.Q	LQEEKQQR	DECOY_WP_012295950.1 MULTISPECIES: HAMP domain-containing histidine kinase [Lysinibacillus]	213	220	1	1057.55	0.0160748	15.2	2	14	0.142857	211.028	0.0786773	2.07868	FALSE	TRUE	139	87	60.9464
F:\25-03-2022\20220324-SAMPLE BROTH-POS-00.d	2066	scanId=1145113		19.0851	628.298	1213.17	2	1254.58	59	3341.8	R.TSIVIDSYDDK.I	TSIVIDSYDDK	DECOY_WP_048395539.1 MULTISPECIES: protein arginine kinase [Lysinibacillus]	343	353	0	1254.6	-0.0165315	-13.1767	2	20	0.1	262.863	0.0786592	2.07866	FALSE	TRUE	139	88	60.9464
F:\25-03-2022\20220324-SAMPLE BROTH-POS-00.d	2415	scanId=1353583		22.5596	472.777	837.007	2	943.539	35	2266.74	K.EVDVLIEK.A	EVDVLIEK	WP_031416550.1 MULTISPECIES: GTPase HflX [Lysinibacillus]	6	13	0	943.523	0.0160427	17.003	2	14	0.142857	178.126	0.0785825	2.07858	TRUE	FALSE	140	88	60.9464
F:\25-03-2022\20220324-SAMPLE BROTH-POS-00.d	3524	scanId=2013274		33.5544	493.796	746.807	2	985.577	36	2672.61	R.IVRPDMKK.S	IVRPDMKK	DECOY_WP_012294077.1 MULTISPECIES: TetR/AcrR family transcriptional regulator [Lysinibacillus]	196	203	1	985.574	0.00311487	3.16046	2	14	0.142857	209.888	0.0785329	2.07853	FALSE	TRUE	140	89	60.9464
F:\25-03-2022\20220324-SAMPLE BROTH-POS-00.d	2044	scanId=1132479		18.8745	437.244	1093.8	2	872.473	44	4858.64	K.TAGPTLASR.V	TAGPTLASR	WP_012295754.1 MULTISPECIES: amidohydrolase [Lysinibacillus]	130	138	0	872.472	0.00175349	2.0098	2	16	0.125	374.431	0.077065	2.07706	TRUE	FALSE	141	89	60.9464
F:\25-03-2022\20220324-SAMPLE BROTH-POS-00.d	3048	scanId=1731842		28.8639	622.82	500.442	2	1243.63	39	2561.54	K.ISYAHLNEAAR.K	ISYAHLNEAAR	DECOY_WP_036161987.1 MULTISPECIES: AMP-binding protein [Lysinibacillus]	826	836	0	1243.63	-0.00572005	-4.59947	2	20	0.1	196.979	0.0768989	2.0769	FALSE	TRUE	141	90	60.9464
F:\25-03-2022\20220324-SAMPLE BROTH-POS-00.d	3123	scanId=1776499		29.6082	692.316	952.362	2	1382.62	58	3723.92	K.VSEQDVKEM(oxidation of M)M(oxidation of M)R.E	VSEQDVKEMMR	WP_012293243.1 MULTISPECIES: signal recognition particle protein [Lysinibacillus]	23	33	1	1382.62	1.95393e-05	0.0141321	2	20	0.1	286.297	0.0768804	2.07688	TRUE	FALSE	142	90	60.9464
F:\25-03-2022\20220324-SAMPLE BROTH-POS-00.d	2439	scanId=1368320		22.8052	602.293	868.496	2	1202.57	30	2289.33	K.GMKEPWHYR.N	GMKEPWHYR	WP_036162511.1 MULTISPECIES: 23S rRNA (uracil(1939)-C(5))-methyltransferase RlmD [Lysinibacillus]	121	129	1	1202.57	0.00499053	4.14991	2	16	0.125	174.426	0.0761908	2.07619	TRUE	FALSE	143	90	60.9464
F:\25-03-2022\20220324-SAMPLE BROTH-POS-00.d	3090	scanId=1757215		29.2868	606.325	974.634	2	1210.63	53	3825.7	K.AANQFTKLYR.Q	AANQFTKLYR	WP_051147711.1 MULTISPECIES: MarR family transcriptional regulator [Lysinibacillus]	20	29	1	1210.65	-0.0108644	-8.97406	2	18	0.111111	290.116	0.0758334	2.07583	TRUE	FALSE	144	90	60.9464
F:\25-03-2022\20220324-SAMPLE BROTH-POS-00.d	2499	scanId=1405001		23.4166	584.347	545.086	2	1166.68	24	1699.51	K.SALLKAPTNPR.V	SALLKAPTNPR	WP_012291986.1 MULTISPECIES: phosphate ABC transporter ATP-binding protein [Lysinibacillus]	223	233	1	1166.68	0.00184668	1.58286	2	20	0.1	128.645	0.075695	2.0757	TRUE	FALSE	145	90	60.9464
F:\25-03-2022\20220324-SAMPLE BROTH-POS-00.d	2733	scanId=1545462		25.7576	530.285	593.063	2	1058.56	33	2208.69	K.VDVGIQDVSK.M	VDVGIQDVSK	WP_012292923.1 MULTISPECIES: DUF4097 family beta strand repeat-containing protein [Lysinibacillus]	339	348	0	1058.56	-0.00482414	-4.55727	2	18	0.111111	166.313	0.0752995	2.0753	TRUE	FALSE	146	90	60.9464
F:\25-03-2022\20220324-SAMPLE BROTH-POS-00.d	2931	scanId=1661926		27.6986	435.279	3246.16	2	868.544	71	11540.9	K.QIPSVVVK.Q	QIPSVVVK	WP_089986041.1 MULTISPECIES: uracil-DNA glycosylase [Lysinibacillus]	32	39	0	868.538	0.00552216	6.35799	2	14	0.142857	863.174	0.0747928	2.07479	TRUE	FALSE	147	90	60.9464
F:\25-03-2022\20220324-SAMPLE BROTH-POS-00.d	3633	scanId=2077437		34.6238	443.262	986.525	2	884.51	44	3354.13	R.QGGSLAKPK.R	QGGSLAKPK	DECOY_WP_012292993.1 MULTISPECIES: sn-glycerol-3-phosphate ABC transporter ATP-binding protein UgpC [Lysinibacillus]	228	236	0	884.508	0.00215599	2.4375	2	16	0.125	250.375	0.0746469	2.07465	FALSE	TRUE	147	91	61.5688
F:\25-03-2022\20220324-SAMPLE BROTH-POS-00.d	2244	scanId=1250675		20.8444	507.267	328.167	2	1012.52	44	3439.53	M.EKIHDMIK.L	EKIHDMIK	DECOY_WP_012294019.1 MULTISPECIES: FtsX-like permease family protein [Lysinibacillus]	2	9	1	1012.54	-0.0178006	-17.5802	2	14	0.142857	255.556	0.0742997	2.0743	FALSE	TRUE	147	92	61.5688
F:\25-03-2022\20220324-SAMPLE BROTH-POS-00.d	3686	scanId=2107303		35.1216	501.783	809.285	2	1001.55	37	1830.16	K.TGEVAELRK.S	TGEVAELRK	WP_031419316.1 MULTISPECIES: endopeptidase La [Lysinibacillus]	247	255	1	1001.55	0.0012131	1.21123	2	16	0.125	135.798	0.0741999	2.0742	TRUE	FALSE	148	92	61.5688
F:\25-03-2022\20220324-SAMPLE BROTH-POS-00.d	1814	scanId=998194		16.6364	372.226	1184.16	2	742.438	27	2134.79	K.LVDQLR.M	LVDQLR	DECOY_WP_174804715.1 MULTISPECIES: isoleucine--tRNA ligase [Lysinibacillus]	237	242	0	742.434	0.00417384	5.62184	2	10	0.2	157.197	0.073636	2.07364	FALSE	TRUE	148	93	61.5688
F:\25-03-2022\20220324-SAMPLE BROTH-POS-00.d	2180	scanId=1211882		20.1979	629.82	2502.26	2	1257.63	43	3498.85	K.GGIPRYYFTGK.V	GGIPRYYFTGK	DECOY_WP_217581455.1 MULTISPECIES: NUDIX domain-containing protein [Lysinibacillus]	104	114	1	1257.65	-0.0249365	-19.8279	2	20	0.1	257.522	0.073602	2.0736	FALSE	TRUE	148	94	61.5688
F:\25-03-2022\20220324-SAMPLE BROTH-POS-00.d	1040	scanId=554757		9.24582	445.715	772.162	2	889.415	39	3420.32	R.AMGWNVGR.V	AMGWNVGR	DECOY_WP_012295853.1 MULTISPECIES: inorganic phosphate transporter [Lysinibacillus]	31	38	0	889.423	-0.00814624	-9.15902	2	14	0.142857	250.938	0.0733667	2.07337	FALSE	TRUE	148	95	61.5688
F:\25-03-2022\20220324-SAMPLE BROTH-POS-00.d	4045	scanId=2322356		38.7058	1172.13	824.618	2	2342.24	54	3205.13	K.EELVLQIGEISM(oxidation of M)GKRVEQIR.K	EELVLQIGEISMGKRVEQIR	DECOY_WP_036162039.1 MULTISPECIES: MerR family transcriptional regulator [Lysinibacillus]	184	203	2	2342.26	-0.0188532	-8.04916	2	38	0.0526316	234.501	0.0731644	2.07316	FALSE	TRUE	148	96	61.5688
F:\25-03-2022\20220324-SAMPLE BROTH-POS-00.d	3039	scanId=1726910		28.7817	582.29	1035.51	2	1162.57	36	2348.88	M.GDIVTVC[carbamidomethylation of C]LMR.H	GDIVTVCLMR	WP_012294088.1 MULTISPECIES: histidine phosphatase family protein [Lysinibacillus]	2	11	0	1162.58	-0.0179574	-15.4461	2	18	0.111111	170.845	0.0727344	2.07273	TRUE	FALSE	149	96	61.5688
F:\25-03-2022\20220324-SAMPLE BROTH-POS-00.d	2937	scanId=1665526		27.7586	486.789	700.004	2	971.564	42	2604.45	K.LAVEEVKGK.Y	LAVEEVKGK	WP_080695243.1 MULTISPECIES: DUF3889 domain-containing protein [Lysinibacillus]	31	39	1	971.565	-0.000734928	-0.756437	2	16	0.125	187.563	0.0720166	2.07202	TRUE	FALSE	150	96	61.5688
F:\25-03-2022\20220324-SAMPLE BROTH-POS-00.d	3470	scanId=1982343		33.0389	807.405	357.528	2	1612.8	33	1967.5	M.DYRIEKDTM(oxidation of M)GEIK.V	DYRIEKDTMGEIK	WP_012294038.1 MULTISPECIES: class II fumarate hydratase [Lysinibacillus]	2	14	2	1612.78	0.0197564	12.2499	2	24	0.0833333	139.181	0.0707398	2.07074	TRUE	FALSE	151	96	61.5688
F:\25-03-2022\20220324-SAMPLE BROTH-POS-00.d	3366	scanId=1921006		32.0166	535.334	1288.56	2	1068.65	82	7447.03	R.VIIQLVQEK.H	VIIQLVQEK	DECOY_WP_012295580.1 MULTISPECIES: RNA methyltransferase [Lysinibacillus]	202	210	0	1068.65	-0.00142606	-1.33444	2	16	0.125	525.943	0.0706245	2.07062	FALSE	TRUE	151	97	61.5688
F:\25-03-2022\20220324-SAMPLE BROTH-POS-00.d	4424	scanId=2541113		42.3518	910.971	1076.16	2	1819.93	50	2714.38	K.TNVTLIFSANQALMAAR.A	TNVTLIFSANQALMAAR	WP_012292738.1 MULTISPECIES: fructose-6-phosphate aldolase [Lysinibacillus]	105	121	0	1819.96	-0.0345438	-18.9805	2	32	0.0625	190.922	0.0703373	2.07034	TRUE	FALSE	152	97	61.5688
F:\25-03-2022\20220324-SAMPLE BROTH-POS-00.d	4036	scanId=2316704		38.6116	971.505	467.847	2	1941	37	2538.71	R.LM(oxidation of M)EKRIAPHM(oxidation of M)IDNLTK.R	LMEKRIAPHMIDNLTK	DECOY_WP_103118646.1 MULTISPECIES: dephospho-CoA kinase [Lysinibacillus]	105	120	2	1941.02	-0.0214713	-11.0619	2	30	0.0666667	177.522	0.0699262	2.06993	FALSE	TRUE	152	98	61.5688
F:\25-03-2022\20220324-SAMPLE BROTH-POS-00.d	2565	scanId=1443622		24.0602	545.288	942.307	2	1088.56	51	3411	K.NSGPTVVM(oxidation of M)LR.S	NSGPTVVMLR	DECOY_WP_054550032.1 MULTISPECIES: tRNA preQ1(34) S-adenosylmethionine ribosyltransferase-isomerase QueA [Lysinibacillus]	312	321	0	1088.56	-0.00396362	-3.64114	2	18	0.111111	238.285	0.0698578	2.06986	FALSE	TRUE	152	99	61.5688
F:\25-03-2022\20220324-SAMPLE BROTH-POS-00.d	3065	scanId=1742481		29.0412	571.331	902.592	2	1140.65	57	3687.97	K.EAIKKADAAPK.Q	EAIKKADAAPK	WP_012293093.1 MULTISPECIES: pyruvate dehydrogenase (acetyl-transferring) E1 component subunit alpha [Lysinibacillus]	329	339	2	1140.65	-0.00234288	-2.05399	2	20	0.1	257.247	0.0697532	2.06975	TRUE	FALSE	153	99	61.5688
F:\25-03-2022\20220324-SAMPLE BROTH-POS-00.d	2683	scanId=1514100		25.2349	802.877	929.844	2	1603.74	53	3631.76	R.GGLFYEQLFSNSSR.V	GGLFYEQLFSNSSR	DECOY_WP_036161783.1 MULTISPECIES: sodium/pantothenate symporter [Lysinibacillus]	442	455	0	1603.76	-0.0239307	-14.9216	2	26	0.0769231	252.78	0.0696026	2.0696	FALSE	TRUE	153	100	61.5688
F:\25-03-2022\20220324-SAMPLE BROTH-POS-00.d	3737	scanId=2137892		35.6314	773.878	597.223	2	1545.74	36	1812.21	R.LEAMIAESLDNAAAK.R	LEAMIAESLDNAAAK	DECOY_WP_024361171.1 MULTISPECIES: DNA repair protein RecN [Lysinibacillus]	180	194	0	1545.77	-0.0290475	-18.7916	2	28	0.0714286	124.435	0.0686647	2.06866	FALSE	TRUE	153	101	61.5688
F:\25-03-2022\20220324-SAMPLE BROTH-POS-00.d	3156	scanId=1796167		29.936	580.307	778.724	2	1158.6	36	1765.28	K.ELIQERSER.S	ELIQERSER	DECOY_WP_031418434.1 MULTISPECIES: tryptophan synthase subunit beta [Lysinibacillus]	168	176	1	1158.6	-0.000306404	-0.264461	2	16	0.125	119.985	0.0679691	2.06797	FALSE	TRUE	153	102	61.5688
F:\25-03-2022\20220324-SAMPLE BROTH-POS-00.d	1950	scanId=1078383		17.9729	654.315	857.675	2	1306.62	70	5853.43	R.NLGMDAITETSR.L	NLGMDAITETSR	WP_012296214.1 MULTISPECIES: acyl-CoA dehydrogenase [Lysinibacillus]	316	327	0	1306.62	-0.0029699	-2.27296	2	22	0.0909091	396.154	0.067679	2.06768	TRUE	FALSE	154	102	61.5688
F:\25-03-2022\20220324-SAMPLE BROTH-POS-00.d	2437	scanId=1366936		22.7821	555.775	1278.21	2	1109.54	47	3098.64	R.SAFLELGMDK.E	SAFLELGMDK	DECOY_WP_012292289.1 MULTISPECIES: GNAT family N-acetyltransferase [Lysinibacillus]	125	134	0	1109.54	-0.00740088	-6.67021	2	18	0.111111	207.233	0.0668789	2.06688	FALSE	TRUE	154	103	61.5688
F:\25-03-2022\20220324-SAMPLE BROTH-POS-00.d	4448	scanId=2555428		42.5903	692.356	957.898	2	1382.7	41	2686.03	R.LLDPHLMM(oxidation of M)KNR.R	LLDPHLMMKNR	WP_036161745.1 MULTISPECIES: ABC transporter permease [Lysinibacillus]	305	315	1	1382.72	-0.0194693	-14.0805	2	20	0.1	176.942	0.0658749	2.06587	TRUE	FALSE	155	103	61.5688
F:\25-03-2022\20220324-SAMPLE BROTH-POS-00.d	1897	scanId=1046629		17.4437	539.777	463.647	2	1077.54	46	3516.51	K.KPEYQGTQK.S	KPEYQGTQK	WP_012295540.1 MULTISPECIES: DUF421 domain-containing protein [Lysinibacillus]	151	159	0	1077.55	-0.00689685	-6.40052	2	16	0.125	230.98	0.0656843	2.06568	TRUE	FALSE	156	103	61.5688
F:\25-03-2022\20220324-SAMPLE BROTH-POS-00.d	2710	scanId=1531057		25.5175	437.753	769.601	2	873.491	34	2605.2	R.SIEEKIR.A	SIEEKIR	WP_012293722.1 MULTISPECIES: TldD/PmbA family protein [Lysinibacillus]	128	134	1	873.492	-0.00101999	-1.16772	2	12	0.166667	170.523	0.0654549	2.06545	TRUE	FALSE	157	103	61.5688
F:\25-03-2022\20220324-SAMPLE BROTH-POS-00.d	4093	scanId=2349158		39.1525	645.332	605.889	2	1288.65	53	4001.96	K.EIRTEVNWDK.Y	EIRTEVNWDK	DECOY_WP_036162200.1 MULTISPECIES: DUF4179 domain-containing protein [Lysinibacillus]	126	135	1	1288.64	0.00733557	5.69248	2	18	0.111111	261.607	0.0653698	2.06537	FALSE	TRUE	157	104	61.5688
F:\25-03-2022\20220324-SAMPLE BROTH-POS-00.d	2932	scanId=1662259		27.7042	543.792	873.447	2	1085.57	48	3489.18	K.NGKMDPVIGR.D	NGKMDPVIGR	WP_012292950.1 MULTISPECIES: AAA family ATPase [Lysinibacillus]	25	34	1	1085.57	0.00515647	4.75004	2	18	0.111111	226.621	0.0649494	2.06495	TRUE	FALSE	158	104	61.5688
F:\25-03-2022\20220324-SAMPLE BROTH-POS-00.d	3758	scanId=2150962		35.8492	627.833	687.315	2	1253.65	52	3430.07	K.NLLYSRFWR.L	NLLYSRFWR	WP_012293962.1 MULTISPECIES: PepSY domain-containing protein [Lysinibacillus]	3	11	1	1253.67	-0.0154251	-12.304	2	16	0.125	222.588	0.0648932	2.06489	TRUE	FALSE	159	104	61.5688
F:\25-03-2022\20220324-SAMPLE BROTH-POS-00.d	4485	scanId=2574706		42.9116	701.886	955.909	2	1401.76	66	4506.02	K.NMPLGSGFNKLPK.D	NMPLGSGFNKLPK	WP_012295888.1 MULTISPECIES: rhodanese-like domain-containing protein [Lysinibacillus]	62	74	1	1401.74	0.0132261	9.43545	2	24	0.0833333	291.728	0.0647418	2.06474	TRUE	FALSE	160	104	61.5688
F:\25-03-2022\20220324-SAMPLE BROTH-POS-00.d	3361	scanId=1918623		31.9769	500.265	1241.41	2	998.516	43	4625.94	K.LAIHQFDR.I	LAIHQFDR	WP_012295993.1 MULTISPECIES: ABC-F type ribosomal protection protein [Lysinibacillus]	26	33	0	998.53	-0.0136351	-13.6551	2	14	0.142857	299.463	0.0647356	2.06474	TRUE	FALSE	161	104	61.5688
F:\25-03-2022\20220324-SAMPLE BROTH-POS-00.d	3070	scanId=1745030		29.0837	499.291	546.368	2	996.568	41	3511.92	K.FLQHIIAR.E	FLQHIIAR	DECOY_WP_031416590.1 MULTISPECIES: ribosome small subunit-dependent GTPase A [Lysinibacillus]	267	274	0	996.587	-0.0192308	-19.2967	2	14	0.142857	225.675	0.0642597	2.06426	FALSE	TRUE	161	105	61.5688
F:\25-03-2022\20220324-SAMPLE BROTH-POS-00.d	2569	scanId=1445838		24.0972	558.304	678.199	2	1114.59	29	1791.86	K.TLVENIVGDR.D	TLVENIVGDR	DECOY_WP_012292342.1 MULTISPECIES: HAD family hydrolase [Lysinibacillus]	159	168	0	1114.6	-0.00527969	-4.73685	2	18	0.111111	114.757	0.0640433	2.06404	FALSE	TRUE	161	106	61.5688
F:\25-03-2022\20220324-SAMPLE BROTH-POS-00.d	2460	scanId=1380791		23.013	530.289	745.05	2	1058.56	28	1811.55	R.LEGTNVELGK.E	LEGTNVELGK	WP_025113922.1 MULTISPECIES: ADP-forming succinate--CoA ligase subunit beta [Lysinibacillus]	349	358	0	1058.56	0.00223575	2.11206	2	18	0.111111	115.988	0.0640271	2.06403	TRUE	FALSE	162	106	61.5688
F:\25-03-2022\20220324-SAMPLE BROTH-POS-00.d	1962	scanId=1085031		18.0837	386.718	824.872	2	771.422	43	3122.48	R.RSKPER.A	RSKPER	WP_012293254.1 MULTISPECIES: FADH(2)-oxidizing methylenetetrahydrofolate--tRNA-(uracil(54)-C(5))-methyltransferase TrmFO [Lysinibacillus]	411	416	1	771.435	-0.0130437	-16.9083	2	10	0.2	197.907	0.0633812	2.06338	TRUE	FALSE	163	106	61.5688
F:\25-03-2022\20220324-SAMPLE BROTH-POS-00.d	2564	scanId=1443289		24.0547	387.223	1594.02	2	772.431	49	3981.15	K.IKEDIR.F	IKEDIR	WP_012293022.1 MULTISPECIES: B12-binding domain-containing radical SAM protein [Lysinibacillus]	209	214	1	772.444	-0.0131777	-17.0598	2	10	0.2	252.07	0.0633159	2.06332	TRUE	FALSE	164	106	61.5688
F:\25-03-2022\20220324-SAMPLE BROTH-POS-00.d	3215	scanId=1830469		30.5077	511.751	987.619	2	1021.49	40	3162.23	R.EMHIHIDK.T	EMHIHIDK	WP_012295721.1 MULTISPECIES: amidohydrolase family protein [Lysinibacillus]	68	75	0	1021.5	-0.0139177	-13.6247	2	14	0.142857	198.097	0.0626447	2.06264	TRUE	FALSE	165	106	61.5688
F:\25-03-2022\20220324-SAMPLE BROTH-POS-00.d	4410	scanId=2533535		42.2255	673.825	817.234	2	1345.64	40	2388.99	K.IGESPM(oxidation of M)WLQNR.L	IGESPMWLQNR	WP_012295578.1 MULTISPECIES: phenylalanine--tRNA ligase subunit beta [Lysinibacillus]	235	245	0	1345.64	-0.00940544	-6.98954	2	20	0.1	149.218	0.0624606	2.06246	TRUE	FALSE	166	106	61.5688
F:\25-03-2022\20220324-SAMPLE BROTH-POS-00.d	3582	scanId=2046021		34.1002	694.393	5674.96	2	1386.77	115	9579.74	R.LDRIPTISAM(oxidation of M)VR.D	LDRIPTISAMVR	WP_036161726.1 MULTISPECIES: Hsp33 family molecular chaperone HslO [Lysinibacillus]	196	207	1	1386.77	0.00677619	4.88633	2	22	0.0909091	593.071	0.0619089	2.06191	TRUE	FALSE	167	106	61.5688
F:\25-03-2022\20220324-SAMPLE BROTH-POS-00.d	2773	scanId=1568459		26.1409	706.331	569.388	2	1410.65	39	2692.82	R.SEGQGVQTTTFEK.L	SEGQGVQTTTFEK	WP_012292938.1 MULTISPECIES: helicase-exonuclease AddAB subunit AddA [Lysinibacillus]	698	710	0	1410.66	-0.0147888	-10.4836	2	24	0.0833333	166.099	0.0616822	2.06168	TRUE	FALSE	168	106	61.5688
F:\25-03-2022\20220324-SAMPLE BROTH-POS-00.d	3091	scanId=1757547		29.2923	529.794	724.815	2	1057.57	41	2049.88	K.KGRNALEDR.I	KGRNALEDR	DECOY_WP_139015310.1 MULTISPECIES: IS3 family transposase [Lysinibacillus]	211	219	2	1057.56	0.0102904	9.73032	2	16	0.125	126.039	0.0614861	2.06149	FALSE	TRUE	168	107	61.5688
F:\25-03-2022\20220324-SAMPLE BROTH-POS-00.d	2093	scanId=1161014		19.3501	423.223	920.307	2	844.432	47	3483.99	K.EGHVLYK.G	EGHVLYK	WP_012293796.1 MULTISPECIES: ABC transporter ATP-binding protein [Lysinibacillus]	62	68	0	844.444	-0.0124254	-14.7143	2	12	0.166667	212.432	0.0609738	2.06097	TRUE	FALSE	169	107	61.5688
F:\25-03-2022\20220324-SAMPLE BROTH-POS-00.d	2056	scanId=1139848		18.9973	601.82	961.221	2	1201.63	53	3934.45	K.YVSIEGIFFK.E	YVSIEGIFFK	WP_012292434.1 MULTISPECIES: universal stress protein [Lysinibacillus]	174	183	0	1201.64	-0.0132916	-11.0613	2	18	0.111111	239.167	0.0607879	2.06079	TRUE	FALSE	170	107	61.5688
F:\25-03-2022\20220324-SAMPLE BROTH-POS-00.d	2882	scanId=1633391		27.2231	565.33	880.176	2	1128.65	48	3637.49	K.KAEIDAQVKK.L	KAEIDAQVKK	WP_031416573.1 MULTISPECIES: C40 family peptidase [Lysinibacillus]	34	43	2	1128.65	-0.00515223	-4.56495	2	18	0.111111	218.947	0.0601917	2.06019	TRUE	FALSE	171	107	61.5688
F:\25-03-2022\20220324-SAMPLE BROTH-POS-00.d	3857	scanId=2210088		36.8347	747.902	618.075	2	1493.79	35	2284.37	R.LLEGKTLGM(oxidation of M)IFEK.H	LLEGKTLGMIFEK	WP_031416420.1 MULTISPECIES: ornithine carbamoyltransferase [Lysinibacillus]	53	65	1	1493.82	-0.0272489	-18.2411	2	24	0.0833333	136.774	0.0598739	2.05987	TRUE	FALSE	172	107	61.5688
F:\25-03-2022\20220324-SAMPLE BROTH-POS-00.d	3610	scanId=2063580		34.3929	443.259	987.661	2	884.503	57	4120.35	K.TGKGGRPGR.V	TGKGGRPGR	WP_012295162.1 MULTISPECIES: transcriptional regulator [Lysinibacillus]	66	74	1	884.494	0.00945067	10.6848	2	16	0.125	246.36	0.0597911	2.05979	TRUE	FALSE	173	107	61.5688
F:\25-03-2022\20220324-SAMPLE BROTH-POS-00.d	3126	scanId=1778216		29.6368	633.324	934.013	2	1264.63	49	2885.44	M.QSLDKQYQQK.F	QSLDKQYQQK	DECOY_WP_012292514.1 MULTISPECIES: DUF2252 family protein [Lysinibacillus]	2	11	1	1264.64	-0.00726705	-5.74633	2	18	0.111111	170.182	0.0589797	2.05898	FALSE	TRUE	173	108	61.6236
F:\25-03-2022\20220324-SAMPLE BROTH-POS-00.d	4316	scanId=2478309		41.305	552.302	981.383	2	1102.59	66	4796.54	K.LERSAASDVR.N	LERSAASDVR	DECOY_WP_012293906.1 MULTISPECIES: mannonate oxidoreductase [Lysinibacillus]	486	495	1	1102.57	0.015623	14.1695	2	18	0.111111	281.45	0.0586776	2.05868	FALSE	TRUE	173	109	61.6236
F:\25-03-2022\20220324-SAMPLE BROTH-POS-00.d	2276	scanId=1270349		21.1724	490.252	584.818	2	978.489	40	2975.25	R.LM(oxidation of M)NEIESK.S	LMNEIESK	WP_036162492.1 MULTISPECIES: DHH family phosphoesterase [Lysinibacillus]	386	393	0	978.469	0.0195222	19.9518	2	14	0.142857	171.527	0.0576514	2.05765	TRUE	FALSE	174	109	61.6236
F:\25-03-2022\20220324-SAMPLE BROTH-POS-00.d	2430	scanId=1362836		22.7138	311.186	1125.61	2	620.358	46	6675.56	K.VLDFK.A	VLDFK	DECOY_WP_012295585.1 MULTISPECIES: LysM peptidoglycan-binding domain-containing protein [Lysinibacillus]	35	39	0	620.353	0.00456365	7.35654	2	8	0.25	382.53	0.0573031	2.0573	FALSE	TRUE	174	110	61.6236
F:\25-03-2022\20220324-SAMPLE BROTH-POS-00.d	2793	scanId=1580647		26.344	457.283	1804.88	2	912.552	59	4419.94	K.KPDLNAKK.I	KPDLNAKK	WP_012295420.1 MULTISPECIES: N-acetylmuramoyl-L-alanine amidase [Lysinibacillus]	203	210	1	912.539	0.0123685	13.5539	2	14	0.142857	253.147	0.0572738	2.05727	TRUE	FALSE	175	110	61.6236
F:\25-03-2022\20220324-SAMPLE BROTH-POS-00.d	2965	scanId=1682597		28.0432	606.839	450.688	2	1211.66	51	3929	K.LRANLTPNSAR.H	LRANLTPNSAR	DECOY_WP_012295646.1 MULTISPECIES: septation ring formation regulator EzrA [Lysinibacillus]	48	58	1	1211.67	-0.00964435	-7.95953	2	20	0.1	224.97	0.0572588	2.05726	FALSE	TRUE	175	111	61.6236
F:\25-03-2022\20220324-SAMPLE BROTH-POS-00.d	2030	scanId=1125050		18.7507	402.205	902.49	2	802.395	41	3309.36	K.GSWGIGAR.E	GSWGIGAR	DECOY_WP_012292144.1 MULTISPECIES: tRNA epoxyqueuosine(34) reductase QueG [Lysinibacillus]	226	233	0	802.409	-0.0139544	-17.3906	2	14	0.142857	186.839	0.0564576	2.05646	FALSE	TRUE	175	112	61.6236
F:\25-03-2022\20220324-SAMPLE BROTH-POS-00.d	3663	scanId=2094889		34.9147	622.362	507.046	2	1242.71	40	2776.18	R.RVSGITVWTPK.K	RVSGITVWTPK	DECOY_WP_036124784.1 MULTISPECIES: ribosome maturation factor RimM [Lysinibacillus]	116	126	1	1242.71	0.00100715	0.81045	2	20	0.1	154.954	0.0558154	2.05582	FALSE	TRUE	175	113	61.6236
F:\25-03-2022\20220324-SAMPLE BROTH-POS-00.d	3592	scanId=2052223		34.2036	679.355	1510.29	2	1356.7	63	4655.49	K.AESLAAKFHGQAK.S	AESLAAKFHGQAK	WP_107922044.1 MULTISPECIES: glutamyl-tRNA reductase [Lysinibacillus]	219	231	1	1356.71	-0.0199968	-14.7391	2	24	0.0833333	257.294	0.0552668	2.05527	TRUE	FALSE	176	113	61.6236
F:\25-03-2022\20220324-SAMPLE BROTH-POS-00.d	3602	scanId=2058594		34.3098	551.295	1218.93	2	1100.58	52	3555.61	R.NLNDFTHIK.D	NLNDFTHIK	DECOY_WP_051563280.1 MULTISPECIES: phage tail protein [Lysinibacillus]	200	208	0	1100.56	0.0145623	13.2317	2	16	0.125	190.063	0.0534545	2.05345	FALSE	TRUE	176	114	61.6236
F:\25-03-2022\20220324-SAMPLE BROTH-POS-00.d	4360	scanId=2504900		41.7482	496.307	1484.31	2	990.599	64	4539.61	-.MLLLKVM(oxidation of M)K.E	MLLLKVMK	DECOY_WP_036161940.1 MULTISPECIES: TetR/AcrR family transcriptional regulator [Lysinibacillus]	1	8	1	990.597	0.00162348	1.63889	2	14	0.142857	237.761	0.0523747	2.05237	FALSE	TRUE	176	115	61.6236
F:\25-03-2022\20220324-SAMPLE BROTH-POS-00.d	2790	scanId=1578763		26.3126	465.766	927.044	2	929.517	42	3322.91	K.QINVPGFR.K	QINVPGFR	WP_012295491.1 MULTISPECIES: trigger factor [Lysinibacillus]	38	45	0	929.508	0.00847966	9.12274	2	14	0.142857	172.63	0.0519513	2.05195	TRUE	FALSE	177	115	61.6236
F:\25-03-2022\20220324-SAMPLE BROTH-POS-00.d	2685	scanId=1515484		25.2579	394.713	2362.05	2	787.411	47	5924.46	K.EIGDLNK.M	EIGDLNK	DECOY_WP_012291839.1 MULTISPECIES: asparagine synthase (glutamine-hydrolyzing) [Lysinibacillus]	108	114	0	787.408	0.00319108	4.05264	2	12	0.166667	306.458	0.0517275	2.05173	FALSE	TRUE	177	116	61.6236
F:\25-03-2022\20220324-SAMPLE BROTH-POS-00.d	3022	scanId=1716052		28.6007	415.753	1322.55	2	829.492	45	3288.82	K.ELASVIAK.E	ELASVIAK	WP_036160656.1 MULTISPECIES: FtsX-like permease family protein [Lysinibacillus]	542	549	0	829.491	0.00110301	1.32974	2	14	0.142857	167.807	0.0510234	2.05102	TRUE	FALSE	178	116	61.6236
F:\25-03-2022\20220324-SAMPLE BROTH-POS-00.d	3584	scanId=2047406		34.1233	586.838	1896.99	2	1171.66	64	5545.98	K.KELLSEVVQK.L	KELLSEVVQK	DECOY_WP_012294101.1 MULTISPECIES: LysR family transcriptional regulator [Lysinibacillus]	3	12	1	1171.68	-0.0188347	-16.0749	2	18	0.111111	280.782	0.0506281	2.05063	FALSE	TRUE	178	117	61.6236
F:\25-03-2022\20220324-SAMPLE BROTH-POS-00.d	4419	scanId=2538731		42.312	1026.52	1184.77	2	2051.03	104	7115.28	R.QNILHLM(oxidation of M)ESERPEQRR.G	QNILHLMESERPEQRR	WP_012295296.1 MULTISPECIES: phage portal protein [Lysinibacillus]	240	255	1	2051.03	-0.0022581	-1.10096	2	30	0.0666667	358.292	0.0503553	2.05036	TRUE	FALSE	179	117	61.6236
F:\25-03-2022\20220324-SAMPLE BROTH-POS-00.d	4505	scanId=2586175		43.1028	759.407	1804.95	2	1516.8	74	5125.35	R.LQEMIADALDLASK.N	LQEMIADALDLASK	DECOY_WP_126657037.1 MULTISPECIES: DNA repair protein RecN [Lysinibacillus]	184	197	0	1516.78	0.0180832	11.9221	2	26	0.0769231	254.919	0.049737	2.04974	FALSE	TRUE	179	118	61.6236
F:\25-03-2022\20220324-SAMPLE BROTH-POS-00.d	3069	scanId=1744697		29.0782	420.748	886.942	2	839.482	33	2249.01	K.NLLLPDR.M	NLLLPDR	WP_036162346.1 MULTISPECIES: AroM family protein [Lysinibacillus]	110	116	0	839.487	-0.00497472	-5.92591	2	12	0.166667	111.525	0.0495885	2.04959	TRUE	FALSE	180	118	61.6236
F:\25-03-2022\20220324-SAMPLE BROTH-POS-00.d	3078	scanId=1750014		29.1668	954.474	536.776	2	1906.93	39	2480.81	R.INDRGGVLGAMETQYQR.G	INDRGGVLGAMETQYQR	WP_012292731.1 MULTISPECIES: methylmalonyl-CoA mutase family protein [Lysinibacillus]	949	965	1	1906.93	0.000873847	0.458248	2	32	0.0625	122.205	0.0492602	2.04926	TRUE	FALSE	181	118	61.6236
F:\25-03-2022\20220324-SAMPLE BROTH-POS-00.d	3120	scanId=1774616		29.5768	422.264	770.645	2	842.514	40	3779.34	R.ILELVEK.G	ILELVEK	WP_012292923.1 MULTISPECIES: DUF4097 family beta strand repeat-containing protein [Lysinibacillus]	8	14	0	842.511	0.00256813	3.04818	2	12	0.166667	185.965	0.0492055	2.04921	TRUE	FALSE	182	118	61.6236
F:\25-03-2022\20220324-SAMPLE BROTH-POS-00.d	4182	scanId=2400099		40.0015	1051.04	586.906	2	2100.07	31	1658.35	R.SLGNEKQTVLADHGLFDEK.N	SLGNEKQTVLADHGLFDEK	DECOY_WP_068983512.1 MULTISPECIES: glycine cleavage system aminomethyltransferase GcvT [Lysinibacillus]	84	102	1	2100.05	0.0187176	8.91296	2	36	0.0555556	81.2924	0.04902	2.04902	FALSE	TRUE	182	119	61.6236
F:\25-03-2022\20220324-SAMPLE BROTH-POS-00.d	3480	scanId=1988328		33.1387	547.282	882.035	2	1092.55	62	3913.36	K.FDTVLDIDR.N	FDTVLDIDR	WP_036160583.1 MULTISPECIES: HAMP domain-containing histidine kinase [Lysinibacillus]	205	213	0	1092.55	0.00511322	4.6801	2	16	0.125	189.806	0.048502	2.0485	TRUE	FALSE	183	119	61.6236
F:\25-03-2022\20220324-SAMPLE BROTH-POS-00.d	2354	scanId=1316236		21.9371	494.28	892.977	2	986.545	42	2938.36	K.KILEEAER.I	KILEEAER	DECOY_WP_012293766.1 MULTISPECIES: ethanolamine ammonia-lyase subunit EutB [Lysinibacillus]	183	190	1	986.54	0.00539672	5.47035	2	14	0.142857	141.516	0.0481617	2.04816	FALSE	TRUE	183	120	61.6236
F:\25-03-2022\20220324-SAMPLE BROTH-POS-00.d	1815	scanId=998527		16.642	464.747	587.1	2	927.48	45	4889.62	R.SRC[carbamidomethylation of C]QHIK.F	SRCQHIK	WP_012291863.1 MULTISPECIES: DNA polymerase III subunit delta' [Lysinibacillus]	160	166	1	927.471	0.00929783	10.0249	2	12	0.166667	233.342	0.0477219	2.04772	TRUE	FALSE	184	120	61.6236
F:\25-03-2022\20220324-SAMPLE BROTH-POS-00.d	4497	scanId=2582075		43.0344	737.907	1580.07	2	1473.8	79	5458.36	R.LSEVYKQFHPRA.-	LSEVYKQFHPRA	WP_012293406.1 MULTISPECIES: site-specific tyrosine recombinase XerD [Lysinibacillus]	289	300	2	1473.77	0.0263284	17.8646	2	22	0.0909091	257.286	0.0471362	2.04714	TRUE	FALSE	185	120	61.6236
F:\25-03-2022\20220324-SAMPLE BROTH-POS-00.d	3551	scanId=2028406		33.8066	642.885	1008.88	2	1283.76	60	4065.33	K.VGRDTALAQIIK.V	VGRDTALAQIIK	WP_012291848.1 MULTISPECIES: heavy metal translocating P-type ATPase [Lysinibacillus]	382	393	1	1283.76	-0.00057499	-0.447896	2	22	0.0909091	191.54	0.0471156	2.04712	TRUE	FALSE	186	120	61.6236
F:\25-03-2022\20220324-SAMPLE BROTH-POS-00.d	2608	scanId=1469443		24.4906	704.838	406.644	2	1407.66	29	2477.36	R.ELTM(oxidation of M)DVMPETVK.A	ELTMDVMPETVK	WP_107921778.1 MULTISPECIES: riboflavin synthase [Lysinibacillus]	57	68	0	1407.66	-0.00117595	-0.835396	2	22	0.0909091	116.368	0.0469724	2.04697	TRUE	FALSE	187	120	61.6236
F:\25-03-2022\20220324-SAMPLE BROTH-POS-00.d	2417	scanId=1354968		22.5827	538.271	1650.93	2	1074.53	57	4075.09	R.ADIQNLMDR.L	ADIQNLMDR	WP_206700980.1 MULTISPECIES: DUF3006 family protein [Lysinibacillus]	75	83	0	1074.51	0.0139268	12.961	2	16	0.125	191.163	0.0469102	2.04691	TRUE	FALSE	188	120	61.6236
F:\25-03-2022\20220324-SAMPLE BROTH-POS-00.d	1820	scanId=1001628		16.6937	309.677	1547.15	2	617.339	69	7595.48	K.KMSPR.G	KMSPR	DECOY_WP_139015310.1 MULTISPECIES: IS3 family transposase [Lysinibacillus]	333	337	1	617.332	0.00691092	11.1948	2	8	0.25	355.227	0.0467682	2.04677	FALSE	TRUE	188	121	61.6236
F:\25-03-2022\20220324-SAMPLE BROTH-POS-00.d	3558	scanId=2031787		33.863	560.324	595.172	2	1118.63	64	4707.32	K.LKC[carbamidomethylation of C]PYLGLR.L	LKCPYLGLR	DECOY_WP_012292734.1 MULTISPECIES: CTP synthase [Lysinibacillus]	92	100	1	1118.63	0.00728037	6.50831	2	16	0.125	219.078	0.0465398	2.04654	FALSE	TRUE	188	122	61.6236
F:\25-03-2022\20220324-SAMPLE BROTH-POS-00.d	4081	scanId=2343011		39.05	788.406	839.071	2	1574.8	51	3513.54	R.AGDAGKGFAVVAEEVR.K	AGDAGKGFAVVAEEVR	WP_012292450.1 MULTISPECIES: methyl-accepting chemotaxis protein [Lysinibacillus]	509	524	1	1574.81	-0.0077967	-4.9509	2	30	0.0666667	161.659	0.0460104	2.04601	TRUE	FALSE	189	122	61.6236
F:\25-03-2022\20220324-SAMPLE BROTH-POS-00.d	3538	scanId=2021089		33.6847	681.36	613.763	2	1360.71	64	4325.16	K.EQEGAFLAGVAAAK.M	EQEGAFLAGVAAAK	WP_012293320.1 MULTISPECIES: BMP family protein [Lysinibacillus]	155	168	0	1360.7	0.00747409	5.49283	2	26	0.0769231	197.015	0.045551	2.04555	TRUE	FALSE	190	122	61.6236
F:\25-03-2022\20220324-SAMPLE BROTH-POS-00.d	4598	scanId=2631491		43.858	467.764	7246.67	2	933.513	137	14560.4	K.EIVEFAVK.Y	EIVEFAVK	WP_036161697.1 MULTISPECIES: nitroreductase family protein [Lysinibacillus]	31	38	0	933.517	-0.00421801	-4.5184	2	14	0.142857	652.429	0.0448084	2.04481	TRUE	FALSE	191	122	61.6236
F:\25-03-2022\20220324-SAMPLE BROTH-POS-00.d	2571	scanId=1447222		24.1202	708.854	1042.84	2	1415.69	40	2585.48	R.NM(oxidation of M)YILGGKWYR.D	NMYILGGKWYR	DECOY_WP_012292409.1 MULTISPECIES: DUF5808 domain-containing protein [Lysinibacillus]	46	56	1	1415.7	-0.00867516	-6.12782	2	20	0.1	113.993	0.0440896	2.04409	FALSE	TRUE	191	123	61.6236
F:\25-03-2022\20220324-SAMPLE BROTH-POS-00.d	3005	scanId=1705917		28.4318	960.991	516.684	2	1919.97	35	2667.52	R.LGNTPAM(oxidation of M)IYEVYGHVLK.E	LGNTPAMIYEVYGHVLK	WP_012295667.1 MULTISPECIES: site-specific integrase [Lysinibacillus]	357	373	0	1919.98	-0.0146734	-7.64247	2	32	0.0625	117.051	0.04388	2.04388	TRUE	FALSE	192	123	61.6236
F:\25-03-2022\20220324-SAMPLE BROTH-POS-00.d	4177	scanId=2397216		39.9535	718.863	828.593	2	1435.71	44	2852.89	R.DNKLFARGASDDK.G	DNKLFARGASDDK	WP_012292640.1 MULTISPECIES: dipeptidase [Lysinibacillus]	112	124	2	1435.71	0.00537868	3.74637	2	24	0.0833333	122.718	0.0430153	2.04302	TRUE	FALSE	193	123	61.6236
F:\25-03-2022\20220324-SAMPLE BROTH-POS-00.d	1077	scanId=575553		9.59242	517.773	475.983	2	1033.53	28	1624.1	R.VEDAVVAFGK.G	VEDAVVAFGK	DECOY_WP_036162376.1 MULTISPECIES: methyl-accepting chemotaxis protein [Lysinibacillus]	144	153	0	1033.54	-0.0130861	-12.6614	2	18	0.111111	69.4944	0.0427896	2.04279	FALSE	TRUE	193	124	61.6236
F:\25-03-2022\20220324-SAMPLE BROTH-POS-00.d	4704	scanId=2672857		44.5475	577.371	13891.4	2	1152.73	229	28863.9	K.LSPVVQVVKGK.R	LSPVVQVVKGK	WP_012292015.1 MULTISPECIES: amidophosphoribosyltransferase [Lysinibacillus]	340	350	1	1152.72	0.00426411	3.69917	2	20	0.1	1233.64	0.0427398	2.04274	TRUE	FALSE	194	124	61.6236
F:\25-03-2022\20220324-SAMPLE BROTH-POS-00.d	2302	scanId=1285867		21.431	868.408	399.981	2	1734.8	26	1258.06	K.ARM(oxidation of M)FPNELSGGEQQR.V	ARMFPNELSGGEQQR	WP_025116775.1 MULTISPECIES: cell division ATP-binding protein FtsE [Lysinibacillus]	131	145	1	1734.81	-0.0101426	-5.84654	2	28	0.0714286	53.7189	0.0426997	2.0427	TRUE	FALSE	195	124	61.6236
F:\25-03-2022\20220324-SAMPLE BROTH-POS-00.d	2675	scanId=1509833		25.1638	651.328	1885.56	2	1300.64	55	4115.58	K.VLDVQVNEEEK.S	VLDVQVNEEEK	WP_012293302.1 MULTISPECIES: transcription termination factor NusA [Lysinibacillus]	292	302	0	1300.65	-0.0100266	-7.70894	2	20	0.1	175.523	0.0426485	2.04265	TRUE	FALSE	196	124	61.6236
F:\25-03-2022\20220324-SAMPLE BROTH-POS-00.d	1211	scanId=652995		10.8831	350.195	634.128	2	698.376	68	5864.25	R.IGGPAER.A	IGGPAER	WP_012294094.1 MULTISPECIES: ABC transporter ATP-binding protein/permease [Lysinibacillus]	17	23	0	698.371	0.00527365	7.55136	2	12	0.166667	249.735	0.042586	2.04259	TRUE	FALSE	197	124	61.6236
F:\25-03-2022\20220324-SAMPLE BROTH-POS-00.d	1507	scanId=820591		13.6764	293.688	911.827	2	585.361	54	4373.74	R.LANIR.T	LANIR	WP_202341242.1 MULTISPECIES: Nif3-like dinuclear metal center hexameric protein [Lysinibacillus]	76	80	0	585.36	0.000676533	1.15575	2	8	0.25	185.511	0.0424147	2.04241	TRUE	FALSE	198	124	61.6236
F:\25-03-2022\20220324-SAMPLE BROTH-POS-00.d	3805	scanId=2179553		36.3257	1266.15	584.033	2	2530.29	49	2959.96	R.YGLEFIHEELVDTFDHIGKLR.R	YGLEFIHEELVDTFDHIGKLR	WP_004269405.1 MULTISPECIES: ribosome biogenesis GTPase YlqF [Lysinibacillus]	225	245	1	2530.29	0.00199834	0.78977	2	40	0.05	123.461	0.0417104	2.04171	TRUE	FALSE	199	124	61.6236
F:\25-03-2022\20220324-SAMPLE BROTH-POS-00.d	3174	scanId=1807304		30.1216	824.381	853.028	2	1646.75	78	4457.07	R.ALNDYGEGIDLPNEK.K	ALNDYGEGIDLPNEK	DECOY_WP_206700645.1 MULTISPECIES: DNA replication initiation control protein YabA [Lysinibacillus]	37	51	0	1646.78	-0.0309612	-18.801	2	28	0.0714286	183.486	0.0411674	2.04117	FALSE	TRUE	199	125	61.6236
F:\25-03-2022\20220324-SAMPLE BROTH-POS-00.d	1773	scanId=974748		16.2457	307.697	1103.81	2	613.38	44	3371.03	K.VTLGPK.G	VTLGPK	WP_126659346.1 MULTISPECIES: chaperonin GroEL [Lysinibacillus]	28	33	0	613.38	0.000530292	0.86454	2	10	0.2	137.726	0.0408558	2.04086	TRUE	FALSE	200	125	61.6236
F:\25-03-2022\20220324-SAMPLE BROTH-POS-00.d	2983	scanId=1693785		28.2296	950.01	757.648	2	1898.01	55	2825.85	K.NTDWGLGVIVNTLGPNTK.T	NTDWGLGVIVNTLGPNTK	DECOY_WP_012292113.1 MULTISPECIES: TerD family protein [Lysinibacillus]	163	180	0	1897.99	0.0152782	8.0497	2	34	0.0588235	114.109	0.0403803	2.04038	FALSE	TRUE	200	126	61.6236
F:\25-03-2022\20220324-SAMPLE BROTH-POS-00.d	4143	scanId=2378653		39.6441	522.809	1539.09	2	1043.6	50	3797.09	R.DALKKQDVK.V	DALKKQDVK	WP_012296105.1 MULTISPECIES: DUF4003 family protein [Lysinibacillus]	215	223	2	1043.6	0.00533942	5.11636	2	16	0.125	151.738	0.0399616	2.03996	TRUE	FALSE	201	126	61.6236
F:\25-03-2022\20220324-SAMPLE BROTH-POS-00.d	3151	scanId=1792898		29.8815	558.303	592.537	2	1114.59	55	3521.48	R.IGDPTGKSKGR.V	IGDPTGKSKGR	WP_089986115.1 MULTISPECIES: tyrosine--tRNA ligase [Lysinibacillus]	84	94	2	1114.61	-0.0180133	-16.1611	2	20	0.1	140.644	0.0399388	2.03994	TRUE	FALSE	202	126	61.6236
F:\25-03-2022\20220324-SAMPLE BROTH-POS-00.d	4521	scanId=2595811		43.2634	737.906	5556.82	2	1473.8	155	12257.7	M.DTLSLEERVALTK.S	DTLSLEERVALTK	WP_225316267.1 MULTISPECIES: isoprenyl transferase [Lysinibacillus]	2	14	1	1473.8	-0.00651976	-4.42376	2	24	0.0833333	483.414	0.0394377	2.03944	TRUE	FALSE	203	126	61.6236
F:\25-03-2022\20220324-SAMPLE BROTH-POS-00.d	4370	scanId=2510549		41.8424	942.506	592.118	2	1883	68	3961.97	M.FPLNLGQTFKGMTSNTK.E	FPLNLGQTFKGMTSNTK	DECOY_WP_036122138.1 MULTISPECIES: YbaB/EbfC family nucleoid-associated protein [Lysinibacillus]	2	18	1	1882.96	0.0371086	19.7076	2	32	0.0625	156.232	0.0394329	2.03943	FALSE	TRUE	203	127	61.6236
F:\25-03-2022\20220324-SAMPLE BROTH-POS-00.d	3388	scanId=1934576		32.2428	535.334	1076.03	2	1068.65	78	6394.07	R.VIIQLVQEK.H	VIIQLVQEK	DECOY_WP_012295580.1 MULTISPECIES: RNA methyltransferase [Lysinibacillus]	202	210	0	1068.65	-0.000844067	-0.789841	2	16	0.125	251.625	0.0393528	2.03935	FALSE	TRUE	203	128	61.6236
F:\25-03-2022\20220324-SAMPLE BROTH-POS-00.d	6057	scanId=3390830		56.5137	983.021	831.715	2	1964.03	71	4335.53	R.NLSISRQDLIRTYVMR.T	NLSISRQDLIRTYVMR	DECOY_WP_012293093.1 MULTISPECIES: pyruvate dehydrogenase (acetyl-transferring) E1 component subunit alpha [Lysinibacillus]	304	319	2	1964.06	-0.0343328	-17.4805	2	30	0.0666667	170.206	0.0392585	2.03926	FALSE	TRUE	203	129	61.6236
F:\25-03-2022\20220324-SAMPLE BROTH-POS-00.d	3423	scanId=1954909		32.5817	708.906	914	2	1415.8	63	4125.19	K.RIMDNLITNAKK.Y	RIMDNLITNAKK	WP_012292525.1 MULTISPECIES: HAMP domain-containing histidine kinase [Lysinibacillus]	445	456	2	1415.79	0.0047886	3.38228	2	22	0.0909091	161.807	0.0392241	2.03922	TRUE	FALSE	204	129	61.6236
F:\25-03-2022\20220324-SAMPLE BROTH-POS-00.d	3010	scanId=1708298		28.4715	420.754	1300.5	2	839.493	41	3267.41	K.KAHILMK.E	KAHILMK	WP_082011579.1 MULTISPECIES: reverse transcriptase domain-containing protein [Lysinibacillus]	431	437	1	839.505	-0.0118381	-14.1012	2	12	0.166667	128.076	0.0391981	2.0392	TRUE	FALSE	205	129	61.6236
F:\25-03-2022\20220324-SAMPLE BROTH-POS-00.d	3776	scanId=2162485		36.0413	577.333	2421	2	1152.65	75	6352.38	R.KLIIGTM(oxidation of M)FSK.R	KLIIGTMFSK	DECOY_WP_012295220.1 MULTISPECIES: potassium-transporting ATPase subunit KdpB [Lysinibacillus]	674	683	1	1152.66	-0.00649216	-5.63234	2	18	0.111111	248.778	0.039163	2.03916	FALSE	TRUE	205	130	61.6236
F:\25-03-2022\20220324-SAMPLE BROTH-POS-00.d	2786	scanId=1575994		26.2664	456.781	647.144	2	911.548	49	4260.43	R.GVVKVPWK.K	GVVKVPWK	WP_206701041.1 MULTISPECIES: TrkH family potassium uptake protein [Lysinibacillus]	7	14	1	911.559	-0.0109927	-12.0592	2	14	0.142857	166.07	0.0389797	2.03898	TRUE	FALSE	206	130	61.6236
F:\25-03-2022\20220324-SAMPLE BROTH-POS-00.d	1313	scanId=709055		11.8174	385.217	433.335	2	768.419	43	3878.92	R.LRDHTK.L	LRDHTK	WP_012295848.1 MULTISPECIES: sodium/proline symporter PutP [Lysinibacillus]	118	123	1	768.424	-0.00522575	-6.8006	2	10	0.2	150.892	0.0389005	2.0389	TRUE	FALSE	207	130	61.6236
F:\25-03-2022\20220324-SAMPLE BROTH-POS-00.d	2227	scanId=1240809		20.68	702.857	674.877	2	1403.7	54	4144.96	R.ELVRKEC[carbamidomethylation of C]LDDK.I	ELVRKECLDDK	WP_036162380.1 MULTISPECIES: low molecular weight phosphotyrosine protein phosphatase [Lysinibacillus]	24	34	2	1403.71	-0.00930316	-6.62756	2	20	0.1	159.071	0.0383769	2.03838	TRUE	FALSE	208	130	61.6236
F:\25-03-2022\20220324-SAMPLE BROTH-POS-00.d	3319	scanId=1893301		31.5549	630.352	563.847	2	1258.69	46	2995.86	R.SLVQVNVMKNK.Q	SLVQVNVMKNK	WP_036161718.1 MULTISPECIES: DNA-3-methyladenine glycosylase [Lysinibacillus]	54	64	1	1258.71	-0.0170152	-13.518	2	20	0.1	114.667	0.0382751	2.03828	TRUE	FALSE	209	130	61.6236
F:\25-03-2022\20220324-SAMPLE BROTH-POS-00.d	3374	scanId=1925824		32.0969	516.3	1324.15	2	1030.59	80	6520.16	R.TPFGIAQIGK.S	TPFGIAQIGK	WP_012295244.1 MULTISPECIES: glycine--tRNA ligase [Lysinibacillus]	193	202	0	1030.58	0.00498179	4.83396	2	18	0.111111	247.94	0.0380267	2.03803	TRUE	FALSE	210	130	61.6236
F:\25-03-2022\20220324-SAMPLE BROTH-POS-00.d	3935	scanId=2257516		37.6251	766.392	512.617	2	1530.77	46	3171.4	K.LPMPSSAITETTQR.Q	LPMPSSAITETTQR	DECOY_WP_031418999.1 MULTISPECIES: hypothetical protein [Lysinibacillus]	51	64	0	1530.77	-0.000810099	-0.52921	2	26	0.0769231	120.252	0.0379178	2.03792	FALSE	TRUE	210	131	61.6904
F:\25-03-2022\20220324-SAMPLE BROTH-POS-00.d	2127	scanId=1181182		19.6862	574.294	1358.28	2	1146.57	62	4339.98	K.QTLTDVSQQK.M	QTLTDVSQQK	WP_012292076.1 MULTISPECIES: SMC family ATPase [Lysinibacillus]	675	684	0	1146.59	-0.0146745	-12.7984	2	18	0.111111	164.336	0.0378656	2.03787	TRUE	FALSE	211	131	61.6904
F:\25-03-2022\20220324-SAMPLE BROTH-POS-00.d	2903	scanId=1645691		27.428	738.394	934.955	2	1474.77	49	2909.56	K.FLNANLIQDGRSK.Q	FLNANLIQDGRSK	DECOY_WP_206700890.1 MULTISPECIES: undecaprenyldiphospho-muramoylpentapeptide beta-N-acetylglucosaminyltransferase [Lysinibacillus]	60	72	1	1474.79	-0.0149172	-10.1148	2	24	0.0833333	109.914	0.0377769	2.03778	FALSE	TRUE	211	132	61.6904
F:\25-03-2022\20220324-SAMPLE BROTH-POS-00.d	2552	scanId=1436859		23.9475	709.354	1836.19	2	1416.69	63	4335.01	R.GRQIM(oxidation of M)NELLGDR.V	GRQIMNELLGDR	WP_012293342.1 MULTISPECIES: 2-oxoacid:acceptor oxidoreductase subunit alpha [Lysinibacillus]	173	184	1	1416.71	-0.0211823	-14.9517	2	22	0.0909091	163.452	0.0377051	2.03771	TRUE	FALSE	212	132	61.6904
F:\25-03-2022\20220324-SAMPLE BROTH-POS-00.d	4607	scanId=2634996		43.9165	616.839	3147.57	2	1231.66	173	14079	R.NIFVGHAFVTK.Y	NIFVGHAFVTK	WP_012292075.1 MULTISPECIES: exonuclease SbcCD subunit D [Lysinibacillus]	171	181	0	1231.67	-0.00707223	-5.74198	2	20	0.1	526.579	0.0374016	2.0374	TRUE	FALSE	213	132	61.6904
F:\25-03-2022\20220324-SAMPLE BROTH-POS-00.d	2081	scanId=1154197		19.2365	601.823	975.129	2	1201.63	33	1975.9	R.KQIC[carbamidomethylation of C]AAARER.D	KQICAAARER	DECOY_WP_012293647.1 MULTISPECIES: prephenate dehydrogenase [Lysinibacillus]	11	20	2	1201.63	-0.00328782	-2.73613	2	18	0.111111	73.225	0.0370591	2.03706	FALSE	TRUE	213	133	62.1577
F:\25-03-2022\20220324-SAMPLE BROTH-POS-00.d	2831	scanId=1603973		26.7327	603.811	563.088	2	1205.61	30	1927.87	R.VQDAVKLMM(oxidation of M)R.R	VQDAVKLMMR	DECOY_WP_012295643.1 MULTISPECIES: tRNA 4-thiouridine(8) synthase ThiI [Lysinibacillus]	130	139	1	1205.63	-0.0192054	-15.9298	2	18	0.111111	71.4325	0.0370525	2.03705	FALSE	TRUE	213	134	62.6251
F:\25-03-2022\20220324-SAMPLE BROTH-POS-00.d	3595	scanId=2054108		34.235	735.912	462.858	2	1469.81	58	3238.98	R.AVC[carbamidomethylation of C]ISHTVKTNLK.H	AVCISHTVKTNLK	DECOY_WP_031418233.1 MULTISPECIES: cytidine deaminase [Lysinibacillus]	60	72	1	1469.8	0.00792104	5.38919	2	24	0.0833333	117.13	0.0361626	2.03616	FALSE	TRUE	213	135	62.8469
F:\25-03-2022\20220324-SAMPLE BROTH-POS-00.d	3742	scanId=2141160		35.6859	638.34	838.024	2	1274.67	36	2285.24	R.NVTKYVHQMR.E	NVTKYVHQMR	DECOY_WP_012292418.1 MULTISPECIES: argininosuccinate lyase [Lysinibacillus]	308	317	1	1274.66	0.0101799	7.98636	2	18	0.111111	82.3603	0.0360401	2.03604	FALSE	TRUE	213	136	62.8469
F:\25-03-2022\20220324-SAMPLE BROTH-POS-00.d	3235	scanId=1842823		30.7136	717.381	503.186	2	1432.75	34	2039.03	K.GRGVPSYWVSPTK.T	GRGVPSYWVSPTK	WP_012295110.1 MULTISPECIES: hypothetical protein [Lysinibacillus]	172	184	1	1432.75	0.00130332	0.909668	2	24	0.0833333	72.4848	0.0355487	2.03555	TRUE	FALSE	214	136	62.8469
F:\25-03-2022\20220324-SAMPLE BROTH-POS-00.d	2156	scanId=1198085		19.9679	422.259	545.112	2	842.504	40	3317.41	K.TGNAVILR.G	TGNAVILR	WP_012293884.1 MULTISPECIES: glutamate-5-semialdehyde dehydrogenase [Lysinibacillus]	139	146	0	842.497	0.00660586	7.84081	2	14	0.142857	116.89	0.0352354	2.03524	TRUE	FALSE	215	136	62.8469
F:\25-03-2022\20220324-SAMPLE BROTH-POS-00.d	2331	scanId=1303271		21.7211	545.291	637.968	2	1088.57	53	3653.08	K.LIDAQSLDSK.Y	LIDAQSLDSK	DECOY_WP_036162236.1 MULTISPECIES: protein translocase subunit SecDF [Lysinibacillus]	217	226	0	1088.57	-0.00408765	-3.75506	2	18	0.111111	128.005	0.0350402	2.03504	FALSE	TRUE	215	137	62.8469
F:\25-03-2022\20220324-SAMPLE BROTH-POS-00.d	3219	scanId=1833239		30.5539	594.326	555.727	2	1186.64	56	4099.01	R.LVGSIDEVVEK.A	LVGSIDEVVEK	WP_012292768.1 MULTISPECIES: F0F1 ATP synthase subunit beta [Lysinibacillus]	453	463	0	1186.64	-0.00765781	-6.45333	2	20	0.1	140.338	0.034237	2.03424	TRUE	FALSE	216	137	62.8469
F:\25-03-2022\20220324-SAMPLE BROTH-POS-00.d	3792	scanId=2171851		36.1974	512.814	1235.39	2	1023.61	50	4295.28	K.AIDALVPIGR.G	AIDALVPIGR	WP_012292766.1 MULTISPECIES: F0F1 ATP synthase subunit alpha [Lysinibacillus]	152	161	0	1023.61	0.00541166	5.28685	2	18	0.111111	146.25	0.034049	2.03405	TRUE	FALSE	217	137	62.8469
F:\25-03-2022\20220324-SAMPLE BROTH-POS-00.d	3830	scanId=2194958		36.5825	414.775	1333.13	2	827.535	55	4611.05	K.KLAAGIQK.A	KLAAGIQK	DECOY_WP_012292418.1 MULTISPECIES: argininosuccinate lyase [Lysinibacillus]	434	441	1	827.523	0.0118386	14.3061	2	14	0.142857	156.441	0.0339274	2.03393	FALSE	TRUE	217	138	63.0152
F:\25-03-2022\20220324-SAMPLE BROTH-POS-00.d	2226	scanId=1240476		20.6745	523.286	2040.54	2	1044.56	62	4994.91	K.IINGM(oxidation of M)GRVGL.-	IINGMGRVGL	WP_012292898.1 MULTISPECIES: flagellar hook-associated protein FlgK [Lysinibacillus]	521	530	1	1044.57	-0.018419	-17.633	2	18	0.111111	167.11	0.0334561	2.03346	TRUE	FALSE	218	138	63.0152
F:\25-03-2022\20220324-SAMPLE BROTH-POS-00.d	2464	scanId=1383174		23.0528	624.811	329.01	2	1247.61	30	1872.92	K.LPESEKFDQR.W	LPESEKFDQR	DECOY_WP_012293128.1 MULTISPECIES: cytochrome c oxidase assembly factor CtaG [Lysinibacillus]	265	274	1	1247.61	-0.00723083	-5.79572	2	18	0.111111	61.2939	0.0327263	2.03273	FALSE	TRUE	218	139	63.4719
F:\25-03-2022\20220324-SAMPLE BROTH-POS-00.d	4832	scanId=2745232		45.7537	1344.72	2016.29	2	2687.43	143	7825.43	K.KTNMDEANIILTGKPQIIDLM(oxidation of M)EGK.A	KTNMDEANIILTGKPQIIDLMEGK	DECOY_WP_036125116.1 MULTISPECIES: Mur ligase family protein [Lysinibacillus]	238	261	1	2687.39	0.0467418	17.393	2	46	0.0434783	251.489	0.0321374	2.03214	FALSE	TRUE	218	140	63.9285
F:\25-03-2022\20220324-SAMPLE BROTH-POS-00.d	4509	scanId=2588943		43.1489	568.786	1697.64	2	1135.56	74	5811.69	R.KIEM(oxidation of M)IEDDK.I	KIEMIEDDK	DECOY_WP_036162603.1 MULTISPECIES: PolC-type DNA polymerase III [Lysinibacillus]	1209	1217	1	1135.54	0.0134859	11.8762	2	16	0.125	186.438	0.0320798	2.03208	FALSE	TRUE	218	141	64.3851
F:\25-03-2022\20220324-SAMPLE BROTH-POS-00.d	900	scanId=479046		7.98397	337.679	978.124	2	673.344	39	3274.69	K.EVLWQ.-	EVLWQ	DECOY_WP_012292903.1 MULTISPECIES: DUF115 domain-containing protein [Lysinibacillus]	396	400	0	673.344	5.01353e-05	0.0744572	2	8	0.25	105.007	0.0320664	2.03207	FALSE	TRUE	218	142	64.5457
F:\25-03-2022\20220324-SAMPLE BROTH-POS-00.d	3209	scanId=1826702		30.4449	623.333	1115.46	2	1244.65	63	4981.15	K.VTGSRFLFYR.G	VTGSRFLFYR	WP_103117223.1 MULTISPECIES: serine--tRNA ligase [Lysinibacillus]	158	167	1	1244.67	-0.0144894	-11.6412	2	18	0.111111	159.136	0.0319476	2.03195	TRUE	FALSE	219	142	64.5457
F:\25-03-2022\20220324-SAMPLE BROTH-POS-00.d	4285	scanId=2460450		41.0074	496.302	2229.38	2	990.589	75	6274.17	K.ILRIFDSK.S	ILRIFDSK	DECOY_WP_089986115.1 MULTISPECIES: tyrosine--tRNA ligase [Lysinibacillus]	41	48	1	990.586	0.00299008	3.01849	2	14	0.142857	199.547	0.0318045	2.0318	FALSE	TRUE	219	143	65.0002
F:\25-03-2022\20220324-SAMPLE BROTH-POS-00.d	2859	scanId=1620759		27.0125	402.227	1115.2	2	802.439	40	3348.15	R.VSEDLLK.N	VSEDLLK	DECOY_WP_012293748.1 MULTISPECIES: DEAD/DEAH box helicase [Lysinibacillus]	432	438	0	802.444	-0.00469957	-5.85658	2	12	0.166667	106.42	0.0317849	2.03178	FALSE	TRUE	219	144	65.3129
F:\25-03-2022\20220324-SAMPLE BROTH-POS-00.d	3812	scanId=2183820		36.3969	728.86	617.092	2	1455.7	48	2912.66	K.LKSSIDM(oxidation of M)TFWGR.E	LKSSIDMTFWGR	DECOY_WP_036161240.1 MULTISPECIES: AraC family transcriptional regulator [Lysinibacillus]	235	246	1	1455.72	-0.0135813	-9.32965	2	22	0.0909091	91.441	0.0313943	2.03139	FALSE	TRUE	219	145	65.3129
F:\25-03-2022\20220324-SAMPLE BROTH-POS-00.d	4540	scanId=2605675		43.4278	1115	1232.29	2	2227.99	121	8882.63	R.NQTWYADNVVQQTMDFLR.E	NQTWYADNVVQQTMDFLR	WP_012292335.1 MULTISPECIES: DUF72 domain-containing protein [Lysinibacillus]	144	161	0	2228.03	-0.037593	-16.8727	2	34	0.0588235	278.644	0.0313696	2.03137	TRUE	FALSE	220	145	65.3129
F:\25-03-2022\20220324-SAMPLE BROTH-POS-00.d	2893	scanId=1639539		27.3255	708.34	2779.25	2	1414.67	75	6121.13	K.GFNWSSLEQYGK.I	GFNWSSLEQYGK	WP_075807287.1 MULTISPECIES: zinc-ribbon domain-containing protein [Lysinibacillus]	461	472	0	1414.65	0.0143418	10.138	2	22	0.0909091	183.368	0.0299566	2.02996	TRUE	FALSE	221	145	65.3129
F:\25-03-2022\20220324-SAMPLE BROTH-POS-00.d	4479	scanId=2571991		42.8664	465.286	1975.91	2	928.557	71	5760.42	K.VNELTILK.G	VNELTILK	DECOY_WP_012293531.1 MULTISPECIES: chitobiase/beta-hexosaminidase C-terminal domain-containing protein [Lysinibacillus]	1104	1111	0	928.559	-0.0026475	-2.85119	2	14	0.142857	172.205	0.0298946	2.02989	FALSE	TRUE	221	146	65.7633
F:\25-03-2022\20220324-SAMPLE BROTH-POS-00.d	3368	scanId=1922390		32.0397	537.315	2252.11	2	1072.62	75	5125.78	R.TALDEIGVKK.M	TALDEIGVKK	DECOY_WP_036161355.1 MULTISPECIES: ABC transporter ATP-binding protein [Lysinibacillus]	114	123	1	1072.61	0.00220382	2.05463	2	18	0.111111	153.012	0.0298514	2.02985	FALSE	TRUE	221	147	65.9155
F:\25-03-2022\20220324-SAMPLE BROTH-POS-00.d	4200	scanId=2410903		40.1816	718.867	1328.13	2	1435.72	62	4007.12	R.DNKLFARGASDDK.G	DNKLFARGASDDK	WP_012292640.1 MULTISPECIES: dipeptidase [Lysinibacillus]	112	124	2	1435.71	0.0138553	9.65048	2	24	0.0833333	118.881	0.0296675	2.02967	TRUE	FALSE	222	147	65.9155
F:\25-03-2022\20220324-SAMPLE BROTH-POS-00.d	5074	scanId=2883044		48.0506	1342.21	679.208	2	2682.41	111	6977.29	R.EKRLAELQGDAEAASAILHISVYAK.D	EKRLAELQGDAEAASAILHISVYAK	DECOY_WP_024363689.1 MULTISPECIES: isochorismate synthase [Lysinibacillus]	298	322	2	2682.43	-0.0201412	-7.50856	2	48	0.0416667	206.261	0.0295617	2.02956	FALSE	TRUE	222	148	66.3639
F:\25-03-2022\20220324-SAMPLE BROTH-POS-00.d	6549	scanId=3643520		60.7252	559.305	1682.26	2	1116.6	129	10489.6	R.GIEISGTITAR.N	GIEISGTITAR	DECOY_WP_012292462.1 MULTISPECIES: acetamidase/formamidase family protein [Lysinibacillus]	33	43	0	1116.61	-0.0178749	-16.0081	2	20	0.1	309.719	0.0295264	2.02953	FALSE	TRUE	222	149	66.8123
F:\25-03-2022\20220324-SAMPLE BROTH-POS-00.d	4309	scanId=2473823		41.2302	509.249	763.474	2	1016.48	38	2690.2	M.VTFYNM(oxidation of M)VK.K	VTFYNMVK	DECOY_WP_012292960.1 MULTISPECIES: lytic transglycosylase domain-containing protein [Lysinibacillus]	2	9	0	1016.5	-0.0174936	-17.2096	2	14	0.142857	79.3212	0.0294852	2.02949	FALSE	TRUE	222	150	67.1732
F:\25-03-2022\20220324-SAMPLE BROTH-POS-00.d	4462	scanId=2562243		42.7039	621.844	679.406	2	1241.67	51	3138.55	K.IWINTPSGAKR.L	IWINTPSGAKR	DECOY_WP_012295584.1 MULTISPECIES: FAD-binding oxidoreductase [Lysinibacillus]	169	179	1	1241.69	-0.0145561	-11.7228	2	20	0.1	88.9116	0.0283289	2.02833	FALSE	TRUE	222	151	67.1732
F:\25-03-2022\20220324-SAMPLE BROTH-POS-00.d	4343	scanId=2494597		41.5765	942.506	541.817	2	1883	47	2436.62	K.VKQVINSIDFLHSLDR.L	VKQVINSIDFLHSLDR	WP_099805038.1 MULTISPECIES: YggS family pyridoxal phosphate-dependent enzyme [Lysinibacillus]	107	122	1	1883.03	-0.0298668	-15.8611	2	30	0.0666667	68.575	0.0281435	2.02814	TRUE	FALSE	223	151	67.1732
F:\25-03-2022\20220324-SAMPLE BROTH-POS-00.d	4196	scanId=2408853		40.1474	645.358	667.308	2	1288.7	34	1901.62	R.ITTASGIELEKK.I	ITTASGIELEKK	DECOY_WP_012293570.1 MULTISPECIES: DUF2087 domain-containing protein [Lysinibacillus]	142	153	1	1288.72	-0.0222426	-17.2594	2	22	0.0909091	53.5127	0.0281407	2.02814	FALSE	TRUE	223	152	67.1732
F:\25-03-2022\20220324-SAMPLE BROTH-POS-00.d	3017	scanId=1712951		28.5491	664.317	1394.6	2	1326.62	66	4937.51	-.MSKQDLYEGEK.I	MSKQDLYEGEK	DECOY_WP_012293762.1 MULTISPECIES: ethanolamine utilization protein EutH [Lysinibacillus]	1	11	1	1326.61	0.00637038	4.80199	2	20	0.1	137.687	0.0278858	2.02789	FALSE	TRUE	223	153	67.1732
F:\25-03-2022\20220324-SAMPLE BROTH-POS-00.d	3890	scanId=2229756		37.1625	686.368	456.438	2	1370.72	48	3125.06	K.LEDVTQALNNVR.V	LEDVTQALNNVR	DECOY_WP_012296086.1 MULTISPECIES: 23S rRNA (guanosine(2251)-2'-O)-methyltransferase RlmB [Lysinibacillus]	85	96	0	1370.72	0.00696295	5.07979	2	22	0.0909091	87.1205	0.027878	2.02788	FALSE	TRUE	223	154	67.1732
F:\25-03-2022\20220324-SAMPLE BROTH-POS-00.d	6398	scanId=3566170		59.436	978.936	1021.5	2	1955.86	103	6762.26	K.VNNQQQTHQNSNSSNEK.S	VNNQQQTHQNSNSSNEK	WP_068983117.1 MULTISPECIES: translation initiation factor IF-2 [Lysinibacillus]	96	112	0	1955.87	-0.0111186	-5.68475	2	32	0.0625	185.345	0.0274088	2.02741	TRUE	FALSE	224	154	67.1732
F:\25-03-2022\20220324-SAMPLE BROTH-POS-00.d	3266	scanId=1862047		31.034	658.346	850.458	2	1314.68	45	3380.47	K.VQDGVAM(oxidation of M)EPLLK.T	VQDGVAMEPLLK	DECOY_WP_068983165.1 MULTISPECIES: type I DNA topoisomerase [Lysinibacillus]	251	262	0	1314.69	-0.00871251	-6.62707	2	22	0.0909091	92.4187	0.027339	2.02734	FALSE	TRUE	224	155	67.1732
F:\25-03-2022\20220324-SAMPLE BROTH-POS-00.d	4809	scanId=2732101		45.5349	528.839	9718.35	2	1055.66	325	40785.8	K.IEVVLDKLK.A	IEVVLDKLK	WP_036122959.1 MULTISPECIES: arginine--tRNA ligase [Lysinibacillus]	272	280	1	1055.66	0.0038585	3.65506	2	16	0.125	1114	0.0273133	2.02731	TRUE	FALSE	225	155	67.1732
F:\25-03-2022\20220324-SAMPLE BROTH-POS-00.d	3880	scanId=2224106		37.0683	355.222	4265.04	2	708.429	75	7579.67	K.GKYTIK.K	GKYTIK	DECOY_WP_012295222.1 MULTISPECIES: sensor histidine kinase KdpD [Lysinibacillus]	810	815	1	708.417	0.0118998	16.7977	2	10	0.2	204.911	0.0270343	2.02703	FALSE	TRUE	225	156	67.1732
F:\25-03-2022\20220324-SAMPLE BROTH-POS-00.d	1239	scanId=668138		11.1355	258.661	942.293	2	515.308	54	5592.1	R.LLDR.M	LLDR	DECOY_WP_012295369.1 MULTISPECIES: DNA internalization-related competence protein ComEC/Rec2 [Lysinibacillus]	165	168	0	515.307	0.000856975	1.66304	2	6	0.333333	150.206	0.0268605	2.02686	FALSE	TRUE	225	157	67.1732
F:\25-03-2022\20220324-SAMPLE BROTH-POS-00.d	4428	scanId=2543163		42.3859	542.808	1452.65	2	1083.6	50	3608.55	K.DAKGIVPADAK.F	DAKGIVPADAK	WP_036125168.1 MULTISPECIES: isoleucine--tRNA ligase [Lysinibacillus]	217	227	1	1083.59	0.00948004	8.74871	2	20	0.1	96.833	0.0268343	2.02683	TRUE	FALSE	226	157	67.1732
F:\25-03-2022\20220324-SAMPLE BROTH-POS-00.d	4331	scanId=2487947		41.4656	880.437	863.639	2	1758.86	47	2346.61	R.AKAGLSALQDDWELSR.V	AKAGLSALQDDWELSR	WP_031418022.1 MULTISPECIES: SafA/ExsA family spore coat assembly protein [Lysinibacillus]	94	109	1	1758.89	-0.0299834	-17.0468	2	30	0.0666667	61.9948	0.0264189	2.02642	TRUE	FALSE	227	157	67.1732
F:\25-03-2022\20220324-SAMPLE BROTH-POS-00.d	2141	scanId=1190104		19.8349	431.238	790.68	2	860.462	52	3787.31	K.ELQEKSK.E	ELQEKSK	DECOY_WP_012293155.1 MULTISPECIES: stage V sporulation protein D [Lysinibacillus]	67	73	1	860.46	0.00147714	1.71668	2	12	0.166667	99.7262	0.0263317	2.02633	FALSE	TRUE	227	158	67.1732
F:\25-03-2022\20220324-SAMPLE BROTH-POS-00.d	4199	scanId=2410570		40.176	1040.05	2181.63	2	2078.09	98	6970.57	R.LLQIM(oxidation of M)EPAEFRQFKQGK.V	LLQIMEPAEFRQFKQGK	WP_082011579.1 MULTISPECIES: reverse transcriptase domain-containing protein [Lysinibacillus]	231	247	2	2078.1	-0.00608916	-2.93016	2	32	0.0625	179.218	0.0257107	2.02571	TRUE	FALSE	228	158	67.1732
F:\25-03-2022\20220324-SAMPLE BROTH-POS-00.d	1834	scanId=1009495		16.8248	410.228	1065.42	2	818.442	86	6907.84	R.VSVDLMR.F	VSVDLMR	WP_012293075.1 MULTISPECIES: bifunctional lysylphosphatidylglycerol flippase/synthetase MprF [Lysinibacillus]	726	732	0	818.432	0.00948401	11.588	2	12	0.166667	176.778	0.025591	2.02559	TRUE	FALSE	229	158	67.1732
F:\25-03-2022\20220324-SAMPLE BROTH-POS-00.d	1710	scanId=937229		15.6204	617.791	841.428	2	1233.57	43	3082.77	K.WGM(oxidation of M)GTLNGGIGR.N	WGMGTLNGGIGR	DECOY_WP_012294185.1 MULTISPECIES: DUF6366 family protein [Lysinibacillus]	24	35	0	1233.59	-0.0239941	-19.4506	2	22	0.0909091	78.8471	0.0255767	2.02558	FALSE	TRUE	229	159	67.1732
F:\25-03-2022\20220324-SAMPLE BROTH-POS-00.d	3590	scanId=2050839		34.1805	600.349	652.043	2	1198.68	62	4360.46	K.AVRGMIPVQTK.T	AVRGMIPVQTK	DECOY_WP_012293472.1 MULTISPECIES: phage tail tube protein [Lysinibacillus]	105	115	1	1198.69	-0.00254163	-2.12034	2	20	0.1	111.104	0.02548	2.02548	FALSE	TRUE	229	160	67.1732
F:\25-03-2022\20220324-SAMPLE BROTH-POS-00.d	3827	scanId=2193241		36.5539	740.377	670.812	2	1478.74	40	2765.16	R.ALSNGEYGVTIVEK.K	ALSNGEYGVTIVEK	WP_036121380.1 MULTISPECIES: riboflavin biosynthesis protein RibF [Lysinibacillus]	145	158	0	1478.76	-0.021369	-14.4506	2	26	0.0769231	69.757	0.0252272	2.02523	TRUE	FALSE	230	160	67.1732
F:\25-03-2022\20220324-SAMPLE BROTH-POS-00.d	3587	scanId=2049123		34.1519	924.469	803.001	2	1846.92	57	3471.01	R.GAISEISPTRTAYYYR.N	GAISEISPTRTAYYYR	WP_012295584.1 MULTISPECIES: FAD-binding oxidoreductase [Lysinibacillus]	352	367	1	1846.92	0.00149253	0.808118	2	30	0.0666667	84.8935	0.0244578	2.02446	TRUE	FALSE	231	160	67.1732
F:\25-03-2022\20220324-SAMPLE BROTH-POS-00.d	4220	scanId=2423039		40.3839	988.485	675.686	2	1974.95	31	1851.02	M.SVEAINSTLTM(oxidation of M)LERMHK.S	SVEAINSTLTMLERMHK	WP_012292897.1 MULTISPECIES: flagellar protein FlgN [Lysinibacillus]	2	18	1	1974.99	-0.0317804	-16.0914	2	32	0.0625	45.2188	0.024429	2.02443	TRUE	FALSE	232	160	67.1732
F:\25-03-2022\20220324-SAMPLE BROTH-POS-00.d	4272	scanId=2452918		40.8818	373.214	2669.05	2	744.413	45	4381.1	R.TISAEPK.F	TISAEPK	DECOY_WP_036160811.1 MULTISPECIES: S-layer homology domain-containing protein [Lysinibacillus]	135	141	0	744.402	0.0114556	15.389	2	12	0.166667	106.711	0.0243571	2.02436	FALSE	TRUE	232	161	67.1732
F:\25-03-2022\20220324-SAMPLE BROTH-POS-00.d	4133	scanId=2373390		39.5564	474.289	1481.71	2	946.564	59	4725.29	K.VFVKRNGK.T	VFVKRNGK	WP_036161990.1 MULTISPECIES: non-ribosomal peptide synthetase [Lysinibacillus]	1403	1410	2	946.571	-0.00741764	-7.83632	2	14	0.142857	114.083	0.0241431	2.02414	TRUE	FALSE	233	161	67.1732
F:\25-03-2022\20220324-SAMPLE BROTH-POS-00.d	1824	scanId=1003677		16.7278	514.781	978.668	2	1027.55	74	6263.42	R.VIETVEPNK.G	VIETVEPNK	WP_036162843.1 MULTISPECIES: glycosyltransferase [Lysinibacillus]	110	118	0	1027.55	-0.00669326	-6.51377	2	16	0.125	149.951	0.0239407	2.02394	TRUE	FALSE	234	161	67.1732
F:\25-03-2022\20220324-SAMPLE BROTH-POS-00.d	3376	scanId=1927208		32.12	902.435	847.504	2	1802.86	49	3373.9	K.DNTTIVEGVGGADAIESR.I	DNTTIVEGVGGADAIESR	WP_036075467.1 MULTISPECIES: chaperonin GroEL [Lysinibacillus]	326	343	0	1802.86	-0.00886277	-4.91594	2	34	0.0588235	79.5395	0.023575	2.02357	TRUE	FALSE	235	161	67.1732
F:\25-03-2022\20220324-SAMPLE BROTH-POS-00.d	2842	scanId=1610841		26.8472	473.739	917.06	2	945.464	54	4011.95	R.EPTTELEK.S	EPTTELEK	WP_036161990.1 MULTISPECIES: non-ribosomal peptide synthetase [Lysinibacillus]	1547	1554	0	945.465	-0.00183002	-1.93558	2	14	0.142857	93.3748	0.0232742	2.02327	TRUE	FALSE	236	161	67.1732
F:\25-03-2022\20220324-SAMPLE BROTH-POS-00.d	3217	scanId=1831854		30.5308	895.92	1072.26	2	1789.82	77	5152.32	K.M(oxidation of M)RNIEEVHNMVKQM(oxidation of M).-	MRNIEEVHNMVKQM	WP_012291990.1 MULTISPECIES: nicotinate phosphoribosyltransferase [Lysinibacillus]	453	466	2	1789.83	-0.00273724	-1.52933	2	26	0.0769231	119.792	0.0232501	2.02325	TRUE	FALSE	237	161	67.1732
F:\25-03-2022\20220324-SAMPLE BROTH-POS-00.d	4247	scanId=2439544		40.6589	391.236	2631.32	2	780.458	81	8700.97	-.M(oxidation of M)LKFVK.E	MLKFVK	DECOY_WP_012292397.1 MULTISPECIES: ornithine--oxo-acid transaminase [Lysinibacillus]	1	6	1	780.457	0.000818121	1.04826	2	10	0.2	201.682	0.0231793	2.02318	FALSE	TRUE	237	162	67.1732
F:\25-03-2022\20220324-SAMPLE BROTH-POS-00.d	4523	scanId=2597195		43.2865	518.318	2177.28	2	1034.62	89	7827.23	R.YIKNKELK.Y	YIKNKELK	WP_051563248.1 MULTISPECIES: DUF3885 domain-containing protein [Lysinibacillus]	98	105	2	1034.61	0.00961402	9.29239	2	14	0.142857	180.292	0.0230339	2.02303	TRUE	FALSE	238	162	67.1732
F:\25-03-2022\20220324-SAMPLE BROTH-POS-00.d	3655	scanId=2089737		34.8288	1180.6	355.054	2	2359.19	51	2663.4	K.EKM(oxidation of M)REIAIVENGSILIEEDR.I	EKMREIAIVENGSILIEEDR	WP_206701070.1 MULTISPECIES: imidazolonepropionase [Lysinibacillus]	11	30	2	2359.21	-0.0108798	-4.61163	2	38	0.0526316	60.3699	0.0226665	2.02267	TRUE	FALSE	239	162	67.1732
F:\25-03-2022\20220324-SAMPLE BROTH-POS-00.d	3684	scanId=2105919		35.0985	1180.61	358.759	2	2359.21	49	2520.37	-.MKEIC[carbamidomethylation of C]LKPIDKSNWEEAIR.L	MKEICLKPIDKSNWEEAIR	WP_012292429.1 MULTISPECIES: GNAT family N-acetyltransferase [Lysinibacillus]	1	19	2	2359.2	0.00848013	3.59449	2	36	0.0555556	56.9354	0.0225901	2.02259	TRUE	FALSE	240	162	67.1732
F:\25-03-2022\20220324-SAMPLE BROTH-POS-00.d	4261	scanId=2446936		40.7821	496.302	1443.73	2	990.589	83	6042.85	-.MLLLKVM(oxidation of M)K.E	MLLLKVMK	DECOY_WP_036161940.1 MULTISPECIES: TetR/AcrR family transcriptional regulator [Lysinibacillus]	1	8	1	990.597	-0.00828814	-8.36681	2	14	0.142857	133.27	0.0220541	2.02205	FALSE	TRUE	240	163	67.1732
F:\25-03-2022\20220324-SAMPLE BROTH-POS-00.d	4526	scanId=2598912		43.3151	443.271	2748.01	2	884.528	99	9002.34	K.LNGLEVLK.V	LNGLEVLK	WP_036162546.1 MULTISPECIES: response regulator transcription factor [Lysinibacillus]	59	66	0	884.533	-0.00490078	-5.54053	2	14	0.142857	198.434	0.0220425	2.02204	TRUE	FALSE	241	163	67.1732
F:\25-03-2022\20220324-SAMPLE BROTH-POS-00.d	3129	scanId=1780099		29.6682	977.03	554.787	2	1952.04	50	3172.84	K.VAFNKLLTDNAHPQQEK.F	VAFNKLLTDNAHPQQEK	DECOY_WP_012292041.1 MULTISPECIES: serine protease [Lysinibacillus]	305	321	1	1952.01	0.0329921	16.9016	2	32	0.0625	69.3887	0.0218696	2.02187	FALSE	TRUE	241	164	67.1732
F:\25-03-2022\20220324-SAMPLE BROTH-POS-00.d	4798	scanId=2725785		45.4296	701.368	2927.59	2	1400.72	176	14896.6	K.SVGQLHGGIATYAK.D	SVGQLHGGIATYAK	WP_012292174.1 MULTISPECIES: rhodanese-related sulfurtransferase [Lysinibacillus]	201	214	0	1400.74	-0.019619	-14.0062	2	26	0.0769231	325.705	0.0218643	2.02186	TRUE	FALSE	242	164	67.1732
F:\25-03-2022\20220324-SAMPLE BROTH-POS-00.d	5080	scanId=2886428		48.107	1316.65	941.251	2	2631.28	119	6675.99	K.NTTFFVIRKDGEYVYDYTGSEK.E	NTTFFVIRKDGEYVYDYTGSEK	DECOY_WP_036160806.1 MULTISPECIES: methyl-accepting chemotaxis protein [Lysinibacillus]	406	427	2	2631.25	0.0329606	12.5266	2	42	0.047619	145.3	0.0217645	2.02176	FALSE	TRUE	242	165	67.1732
F:\25-03-2022\20220324-SAMPLE BROTH-POS-00.d	6520	scanId=3628650		60.4774	817.428	1193.61	2	1632.84	115	7149.07	K.NDLIGTIQAPTEAYK.W	NDLIGTIQAPTEAYK	WP_031419090.1 MULTISPECIES: cell wall-active antibiotics response protein LiaF [Lysinibacillus]	109	123	0	1632.84	0.00550775	3.37312	2	28	0.0714286	155.175	0.0217056	2.02171	TRUE	FALSE	243	165	67.1732
F:\25-03-2022\20220324-SAMPLE BROTH-POS-00.d	4569	scanId=2619447		43.6573	1127.57	1835.56	2	2253.13	114	7247.05	K.QGTNPGYDPLTILVEESHKR.G	QGTNPGYDPLTILVEESHKR	WP_012293077.1 MULTISPECIES: family 10 glycosylhydrolase [Lysinibacillus]	110	129	1	2253.14	-0.00944448	-4.1917	2	38	0.0526316	157.266	0.0217007	2.0217	TRUE	FALSE	244	165	67.1732
F:\25-03-2022\20220324-SAMPLE BROTH-POS-00.d	3002	scanId=1704200		28.4032	580.309	553.402	2	1158.6	41	2367.62	K.DLEISLDLNK.L	DLEISLDLNK	DECOY_WP_012292082.1 MULTISPECIES: polyphosphate kinase [Lysinibacillus]	256	265	0	1158.61	-0.00920406	-7.94403	2	18	0.111111	51.0833	0.0215758	2.02158	FALSE	TRUE	244	166	67.1732
F:\25-03-2022\20220324-SAMPLE BROTH-POS-00.d	4645	scanId=2650119		44.1685	655.355	7062.5	2	1308.7	198	20530.5	R.AEAHDKIIQER.I	AEAHDKIIQER	WP_012293392.1 MULTISPECIES: sensor histidine kinase [Lysinibacillus]	128	138	1	1308.68	0.0165152	12.6197	2	20	0.1	439.806	0.0214221	2.02142	TRUE	FALSE	245	166	67.1732
F:\25-03-2022\20220324-SAMPLE BROTH-POS-00.d	2851	scanId=1616326		26.9386	420.762	623.379	2	839.51	43	3273.43	K.APIAIIDK.R	APIAIIDK	WP_012291882.1 MULTISPECIES: ribose-phosphate diphosphokinase [Lysinibacillus]	193	200	0	839.512	-0.00200525	-2.38859	2	14	0.142857	67.0959	0.0204971	2.0205	TRUE	FALSE	246	166	67.1732
F:\25-03-2022\20220324-SAMPLE BROTH-POS-00.d	4697	scanId=2670068		44.501	760.462	33352.9	2	1518.91	287	28234.9	K.HKKHTEVLVTVTK.D	HKKHTEVLVTVTK	DECOY_WP_008181723.1 MULTISPECIES: 30S ribosomal protein S17 [Lysinibacillus]	56	68	2	1518.89	0.0206614	13.603	2	24	0.0833333	573.861	0.0203245	2.02032	FALSE	TRUE	246	167	67.3042
F:\25-03-2022\20220324-SAMPLE BROTH-POS-00.d	4600	scanId=2632690		43.878	445.289	35592.6	2	888.564	114	15113.5	K.LLEKMKK.K	LLEKMKK	WP_012293155.1 MULTISPECIES: stage V sporulation protein D [Lysinibacillus]	107	113	2	888.547	0.0174843	19.6774	2	12	0.166667	304.042	0.0201172	2.02012	TRUE	FALSE	247	167	67.3042
F:\25-03-2022\20220324-SAMPLE BROTH-POS-00.d	4695	scanId=2668864		44.4809	535.818	6984.04	2	1069.62	163	18067.5	K.VRLAKDNVR.N	VRLAKDNVR	DECOY_WP_012295519.1 MULTISPECIES: accessory gene regulator AgrB [Lysinibacillus]	52	60	2	1069.64	-0.0140395	-13.1255	2	16	0.125	363.015	0.0200921	2.02009	FALSE	TRUE	247	168	67.4342
F:\25-03-2022\20220324-SAMPLE BROTH-POS-00.d	4652	scanId=2653167		44.2193	685.91	3127.03	2	1369.81	181	14259.1	R.LALGTVIEAQLDK.G	LALGTVIEAQLDK	WP_068983117.1 MULTISPECIES: translation initiation factor IF-2 [Lysinibacillus]	435	447	0	1369.78	0.0246751	18.0139	2	24	0.0833333	281.941	0.0197727	2.01977	TRUE	FALSE	248	168	67.4342
F:\25-03-2022\20220324-SAMPLE BROTH-POS-00.d	4590	scanId=2628289		43.8047	1595.33	1811.07	2	3188.65	93	6443.11	K.MMPITYSGSTVVNAVSSGSITGQLASSFVAVK.A	MMPITYSGSTVVNAVSSGSITGQLASSFVAVK	DECOY_WP_012292588.1 MULTISPECIES: TRAP transporter permease [Lysinibacillus]	402	433	0	3188.61	0.0417159	13.0828	2	62	0.0322581	127.237	0.0197477	2.01975	FALSE	TRUE	248	169	67.8356
F:\25-03-2022\20220324-SAMPLE BROTH-POS-00.d	4641	scanId=2648144		44.1356	630.862	42192	2	1259.71	205	22670.2	K.LLTGVSEVLSSR.I	LLTGVSEVLSSR	DECOY_WP_036162287.1 MULTISPECIES: aspartate kinase [Lysinibacillus]	170	181	0	1259.71	4.02334e-05	0.0319387	2	22	0.0909091	435.652	0.0192169	2.01922	FALSE	TRUE	248	170	68.237
F:\25-03-2022\20220324-SAMPLE BROTH-POS-00.d	3282	scanId=1871195		31.1865	645.825	654.36	2	1289.64	49	3690.44	R.EVAEEMVTLNR.D	EVAEEMVTLNR	DECOY_WP_012293225.1 MULTISPECIES: L-serine ammonia-lyase, iron-sulfur-dependent, subunit alpha [Lysinibacillus]	247	257	0	1289.63	0.00765322	5.93444	2	20	0.1	69.5411	0.0188436	2.01884	FALSE	TRUE	248	171	68.6384
F:\25-03-2022\20220324-SAMPLE BROTH-POS-00.d	4626	scanId=2642493		44.0414	672.41	7301.73	2	1342.8	305	31142	K.KLEDIEITVKR.A	KLEDIEITVKR	DECOY_WP_012293173.1 MULTISPECIES: DivIVA domain-containing protein [Lysinibacillus]	54	64	2	1342.78	0.0229472	17.0893	2	20	0.1	569.634	0.0182915	2.01829	FALSE	TRUE	248	172	68.8857
F:\25-03-2022\20220324-SAMPLE BROTH-POS-00.d	3178	scanId=1809522		30.1586	822.923	757.192	2	1643.83	87	6241.45	K.SIYTHVPHFM(oxidation of M)KLR.D	SIYTHVPHFMKLR	DECOY_WP_012292493.1 MULTISPECIES: nicotinate phosphoribosyltransferase [Lysinibacillus]	86	98	1	1643.86	-0.0292306	-17.7817	2	24	0.0833333	113.281	0.0181498	2.01815	FALSE	TRUE	248	173	68.8857
F:\25-03-2022\20220324-SAMPLE BROTH-POS-00.d	3315	scanId=1891251		31.5207	629.851	473.577	2	1257.69	42	3274.16	K.EGLGLVWQTQK.Y	EGLGLVWQTQK	WP_012292187.1 MULTISPECIES: HIT family protein [Lysinibacillus]	110	120	0	1257.67	0.0164518	13.0811	2	20	0.1	58.9653	0.0180093	2.01801	TRUE	FALSE	249	173	68.8857
F:\25-03-2022\20220324-SAMPLE BROTH-POS-00.d	1833	scanId=1009163		16.8193	554.281	1471.25	2	1106.55	90	6659.77	K.LGDRLC[carbamidomethylation of C]VM(oxidation of M)K.D	LGDRLCVMK	WP_012293945.1 MULTISPECIES: ABC transporter ATP-binding protein [Lysinibacillus]	203	211	1	1106.56	-0.0097295	-8.79258	2	16	0.125	119.851	0.0179962	2.018	TRUE	FALSE	250	173	68.8857
F:\25-03-2022\20220324-SAMPLE BROTH-POS-00.d	4577	scanId=2622754		43.7124	1395.72	2841.9	2	2789.43	103	8105	R.VPEAFTIHARGDPLIEVEVPTDTQR.Y	VPEAFTIHARGDPLIEVEVPTDTQR	DECOY_WP_058844058.1 MULTISPECIES: tRNA 2-thiouridine(34) synthase MnmA [Lysinibacillus]	39	63	1	2789.43	-0.00364397	-1.30635	2	48	0.0416667	144.966	0.017886	2.01789	FALSE	TRUE	250	174	69.2492
F:\25-03-2022\20220324-SAMPLE BROTH-POS-00.d	4606	scanId=2634663		43.9109	594.821	4042.7	2	1187.63	202	18371	R.AVANPRYELR.E	AVANPRYELR	DECOY_WP_012295691.1 MULTISPECIES: catabolite control protein A [Lysinibacillus]	284	293	1	1187.64	-0.0133945	-11.2782	2	18	0.111111	323.853	0.0176285	2.01763	FALSE	TRUE	250	175	69.2492
F:\25-03-2022\20220324-SAMPLE BROTH-POS-00.d	4737	scanId=2689422		44.8236	645.883	4303.61	2	1289.75	193	15796.9	K.VSKIGC[carbamidomethylation of C]SIVLSK.S	VSKIGCSIVLSK	WP_225341041.1 MULTISPECIES: formate dehydrogenase accessory sulfurtransferase FdhD [Lysinibacillus]	209	220	1	1289.74	0.0146528	11.3611	2	22	0.0909091	272.362	0.0172414	2.01724	TRUE	FALSE	251	175	69.2492
F:\25-03-2022\20220324-SAMPLE BROTH-POS-00.d	6024	scanId=3372805		56.2133	813.406	553.296	2	1624.8	75	5249.9	K.APIDMKEYKGTSASK.R	APIDMKEYKGTSASK	DECOY_WP_036160615.1 MULTISPECIES: HAMP domain-containing histidine kinase [Lysinibacillus]	248	262	2	1624.81	-0.0163991	-10.0929	2	28	0.0714286	90.4413	0.0172272	2.01723	FALSE	TRUE	251	176	69.2492
F:\25-03-2022\20220324-SAMPLE BROTH-POS-00.d	4890	scanId=2778925		46.3153	666.894	2989.73	2	1331.77	188	15652.7	K.VSKIGC[carbamidomethylation of C]EIVLSK.S	VSKIGCEIVLSK	WP_031416178.1 MULTISPECIES: formate dehydrogenase accessory sulfurtransferase FdhD [Lysinibacillus]	213	224	1	1331.75	0.0256368	19.2505	2	22	0.0909091	269.641	0.0172265	2.01723	TRUE	FALSE	252	176	69.2492
F:\25-03-2022\20220324-SAMPLE BROTH-POS-00.d	3829	scanId=2194625		36.5769	1266.15	1083.07	2	2530.29	52	3321.94	R.LATYAARC[carbamidomethylation of C]IENEILMHLRTQK.K	LATYAARCIENEILMHLRTQK	WP_008180932.1 MULTISPECIES: RNA polymerase sporulation sigma factor SigK [Lysinibacillus]	102	122	2	2530.31	-0.0208598	-8.24396	2	40	0.05	57.0095	0.0171615	2.01716	TRUE	FALSE	253	176	69.2492
F:\25-03-2022\20220324-SAMPLE BROTH-POS-00.d	4747	scanId=2694905		44.9149	628.381	2714.69	2	1254.75	189	14311.3	K.AKVTLRNGQIR.I	AKVTLRNGQIR	DECOY_WP_012295369.1 MULTISPECIES: DNA internalization-related competence protein ComEC/Rec2 [Lysinibacillus]	9	19	2	1254.75	-0.00484739	-3.86323	2	20	0.1	242.709	0.0169592	2.01696	FALSE	TRUE	253	177	69.6427
F:\25-03-2022\20220324-SAMPLE BROTH-POS-00.d	4578	scanId=2623086		43.718	572.808	2713.66	2	1143.6	150	12589.3	K.TGANAIIEAER.E	TGANAIIEAER	DECOY_WP_012292916.1 MULTISPECIES: preprotein translocase subunit SecA [Lysinibacillus]	362	372	0	1143.59	0.0140306	12.2689	2	20	0.1	213.471	0.0169565	2.01696	FALSE	TRUE	253	178	70.0362
F:\25-03-2022\20220324-SAMPLE BROTH-POS-00.d	3561	scanId=2033503		33.8916	586.837	910.484	2	1171.66	46	2755.04	K.QLKELEEKR.D	QLKELEEKR	DECOY_WP_036161951.1 MULTISPECIES: DUF6138 family protein [Lysinibacillus]	6	14	2	1171.66	0.00378482	3.23032	2	16	0.125	46.1104	0.0167368	2.01674	FALSE	TRUE	253	179	70.1524
F:\25-03-2022\20220324-SAMPLE BROTH-POS-00.d	4784	scanId=2717367		45.2893	679.353	3227.41	2	1356.69	187	15056.1	R.TEIANYLYQSR.G	TEIANYLYQSR	WP_012291840.1 MULTISPECIES: PLP-dependent aminotransferase family protein [Lysinibacillus]	153	163	0	1356.67	0.024933	18.3781	2	20	0.1	248.247	0.0164881	2.01649	TRUE	FALSE	254	179	70.1524
F:\25-03-2022\20220324-SAMPLE BROTH-POS-00.d	4565	scanId=2618116		43.6351	542.811	6156.2	2	1083.61	135	11151.3	K.LTRYGISFK.K	LTRYGISFK	DECOY_WP_036162052.1 MULTISPECIES: aromatic acid exporter family protein [Lysinibacillus]	316	324	1	1083.61	-0.000566922	-0.52318	2	16	0.125	182.196	0.0163385	2.01634	FALSE	TRUE	254	180	70.2676
F:\25-03-2022\20220324-SAMPLE BROTH-POS-00.d	3277	scanId=1868312		31.1384	816.929	829.89	2	1631.84	58	3899.84	R.SREINTLFQFYSK.Q	SREINTLFQFYSK	WP_036160791.1 MULTISPECIES: tyrosine-type recombinase/integrase [Lysinibacillus]	206	218	1	1631.83	0.0122724	7.52065	2	24	0.0833333	62.1981	0.0159489	2.01595	TRUE	FALSE	255	180	70.2676
F:\25-03-2022\20220324-SAMPLE BROTH-POS-00.d	4649	scanId=2652168		44.2027	704.891	3374.34	2	1407.77	235	17438.9	K.ASEVTPPEGPRLR.E	ASEVTPPEGPRLR	DECOY_WP_031416725.1 MULTISPECIES: DNA-directed RNA polymerase subunit beta [Lysinibacillus]	939	951	1	1407.75	0.020354	14.4586	2	24	0.0833333	271.831	0.0155877	2.01559	FALSE	TRUE	255	181	70.382
F:\25-03-2022\20220324-SAMPLE BROTH-POS-00.d	1526	scanId=831289		13.8547	552.286	1559.71	2	1102.56	45	2668.67	K.QAC[carbamidomethylation of C]LDNAALK.K	QACLDNAALK	WP_031418618.1 MULTISPECIES: alanine dehydrogenase [Lysinibacillus]	331	340	0	1102.54	0.0133997	12.1535	2	18	0.111111	41.4702	0.0155397	2.01554	TRUE	FALSE	256	181	70.382
F:\25-03-2022\20220324-SAMPLE BROTH-POS-00.d	4684	scanId=2665152		44.4191	645.386	3758.74	2	1288.76	194	14819.9	R.TLKRLASLTMR.A	TLKRLASLTMR	DECOY_WP_012292313.1 MULTISPECIES: acyl-CoA dehydrogenase family protein [Lysinibacillus]	28	38	2	1288.76	-0.0078728	-6.10879	2	20	0.1	224.276	0.0151334	2.01513	FALSE	TRUE	256	182	70.4955
F:\25-03-2022\20220324-SAMPLE BROTH-POS-00.d	4554	scanId=2613192		43.5531	443.274	10860.5	2	884.533	150	13938.3	K.QLNARGVK.T	QLNARGVK	WP_012293188.1 MULTISPECIES: dihydroorotate dehydrogenase electron transfer subunit [Lysinibacillus]	128	135	1	884.519	0.0133082	15.0457	2	14	0.142857	208.018	0.0149241	2.01492	TRUE	FALSE	257	182	70.4955
F:\25-03-2022\20220324-SAMPLE BROTH-POS-00.d	4596	scanId=2630826		43.847	1123.58	4987.23	2	2245.15	215	14738.3	K.GSDADILIAADVTLGLDTEASAK.A	GSDADILIAADVTLGLDTEASAK	DECOY_WP_036162495.1 MULTISPECIES: D-alanyl-D-alanine carboxypeptidase [Lysinibacillus]	395	417	0	2245.13	0.0178159	7.93536	2	44	0.0454545	219.87	0.0149183	2.01492	FALSE	TRUE	257	183	70.6081
F:\25-03-2022\20220324-SAMPLE BROTH-POS-00.d	4297	scanId=2467342		41.1222	738.376	1002.08	2	1474.74	86	8469.59	K.ELDSEVESVEALR.A	ELDSEVESVEALR	WP_012295491.1 MULTISPECIES: trigger factor [Lysinibacillus]	258	270	0	1474.72	0.022064	14.9615	2	24	0.0833333	123.841	0.0146219	2.01462	TRUE	FALSE	258	183	70.6081
F:\25-03-2022\20220324-SAMPLE BROTH-POS-00.d	3547	scanId=2026023		33.7669	681.853	591.366	2	1361.69	43	2921.71	K.HSVMDQLKYGGK.R	HSVMDQLKYGGK	DECOY_WP_227256955.1 MULTISPECIES: SLC13 family permease [Lysinibacillus]	241	252	1	1361.68	0.0157313	11.5529	2	22	0.0909091	42.6123	0.0145847	2.01458	FALSE	TRUE	258	184	70.9939
F:\25-03-2022\20220324-SAMPLE BROTH-POS-00.d	6068	scanId=3396715		56.6118	1260.16	609.485	2	2518.31	67	3563.73	R.ILQDALTVARMGSAC[carbamidomethylation of C]VKNITETK.V	ILQDALTVARMGSACVKNITETK	DECOY_WP_031418481.1 MULTISPECIES: acetyl-CoA C-acetyltransferase [Lysinibacillus]	301	323	2	2518.32	-0.0142259	-5.64896	2	44	0.0454545	51.6364	0.0144894	2.01449	FALSE	TRUE	258	185	71.1041
F:\25-03-2022\20220324-SAMPLE BROTH-POS-00.d	4561	scanId=2616067		43.601	584.359	15482.4	2	1166.7	233	21515.3	K.LKEINNPVIK.E	LKEINNPVIK	WP_012292397.1 MULTISPECIES: ornithine--oxo-acid transaminase [Lysinibacillus]	323	332	1	1166.7	0.00158242	1.35632	2	18	0.111111	301.834	0.0140288	2.01403	TRUE	FALSE	259	185	71.1041
F:\25-03-2022\20220324-SAMPLE BROTH-POS-00.d	2661	scanId=1501247		25.0206	662.82	1002.67	2	1323.63	51	4833.87	K.M(oxidation of M)GVVGC[carbamidomethylation of C]YAAPQR.I	MGVVGCYAAPQR	DECOY_WP_012292028.1 MULTISPECIES: Asp-tRNA(Asn)/Glu-tRNA(Gln) amidotransferase subunit GatA [Lysinibacillus]	300	311	0	1323.61	0.0192077	14.5116	2	22	0.0909091	67.7372	0.014013	2.01401	FALSE	TRUE	259	186	71.4885
F:\25-03-2022\20220324-SAMPLE BROTH-POS-00.d	4576	scanId=2622421		43.7069	584.859	7276.14	2	1167.7	239	24733.2	K.ELKDKPVLVK.A	ELKDKPVLVK	DECOY_WP_012292923.1 MULTISPECIES: DUF4097 family beta strand repeat-containing protein [Lysinibacillus]	186	195	1	1167.72	-0.0187304	-16.0401	2	18	0.111111	344.749	0.0139387	2.01394	FALSE	TRUE	259	187	71.5367
F:\25-03-2022\20220324-SAMPLE BROTH-POS-00.d	6293	scanId=3511796		58.5298	978.936	779.534	2	1955.86	84	5847.59	K.FEFQM(oxidation of M)LYGFRTDMQK.E	FEFQMLYGFRTDMQK	WP_012291984.1 MULTISPECIES: proline dehydrogenase family protein [Lysinibacillus]	243	257	1	1955.89	-0.0340067	-17.3868	2	28	0.0714286	81.2654	0.0138972	2.0139	TRUE	FALSE	260	187	71.5367
F:\25-03-2022\20220324-SAMPLE BROTH-POS-00.d	2652	scanId=1495764		24.9293	651.334	484.004	2	1300.65	60	5119.87	K.NRIGADAQFPGR.K	NRIGADAQFPGR	DECOY_WP_012292603.1 MULTISPECIES: succinate CoA transferase [Lysinibacillus]	409	420	1	1300.66	-0.0108788	-8.36402	2	22	0.0909091	70.021	0.0136763	2.01368	FALSE	TRUE	260	188	71.5367
F:\25-03-2022\20220324-SAMPLE BROTH-POS-00.d	4099	scanId=2352758		39.2125	1008.53	1226.3	2	2015.05	63	3889.2	K.LDERNIYTNGNYIKFR.I	LDERNIYTNGNYIKFR	DECOY_WP_051563253.1 MULTISPECIES: stalk domain-containing protein [Lysinibacillus]	8	23	2	2015.02	0.0302099	14.9923	2	30	0.0666667	53.0557	0.0136418	2.01364	FALSE	TRUE	260	189	71.5367
F:\25-03-2022\20220324-SAMPLE BROTH-POS-00.d	4586	scanId=2626958		43.7825	565.322	10786.5	2	1128.63	199	23991.8	K.VVLQEEKER.A	VVLQEEKER	WP_012293310.1 MULTISPECIES: polyribonucleotide nucleotidyltransferase [Lysinibacillus]	691	699	1	1128.61	0.0156874	13.8997	2	16	0.125	326.877	0.0136245	2.01362	TRUE	FALSE	261	189	71.5367
F:\25-03-2022\20220324-SAMPLE BROTH-POS-00.d	4625	scanId=2642160		44.0359	487.299	18868.4	2	972.583	206	21325.9	K.KQGLPFKR.Y	KQGLPFKR	WP_012292487.1 MULTISPECIES: response regulator transcription factor [Lysinibacillus]	423	430	2	972.587	-0.00343006	-3.52674	2	14	0.142857	284.089	0.0133213	2.01332	TRUE	FALSE	262	189	71.5367
F:\25-03-2022\20220324-SAMPLE BROTH-POS-00.d	4714	scanId=2677507		44.625	629.389	3618.35	2	1256.76	195	14314.9	K.KLWKVVESLR.T	KLWKVVESLR	WP_012295331.1 MULTISPECIES: chromate efflux transporter [Lysinibacillus]	5	14	2	1256.76	0.00322415	2.56545	2	18	0.111111	188.214	0.0131481	2.01315	TRUE	FALSE	263	189	71.5367
F:\25-03-2022\20220324-SAMPLE BROTH-POS-00.d	2794	scanId=1580980		26.3495	780.906	451.124	2	1559.8	41	2866.81	R.FYIDLLEYISER.A	FYIDLLEYISER	DECOY_WP_206701082.1 MULTISPECIES: Ger(x)C family spore germination protein [Lysinibacillus]	253	264	0	1559.79	0.0108289	6.94255	2	22	0.0909091	37.6579	0.0131358	2.01314	FALSE	TRUE	263	190	71.7481
F:\25-03-2022\20220324-SAMPLE BROTH-POS-00.d	4620	scanId=2640282		44.0046	619.868	4271.31	2	1237.72	158	12612.7	K.NFLKSIFGGKK.E	NFLKSIFGGKK	DECOY_WP_036161284.1 MULTISPECIES: toxic anion resistance protein [Lysinibacillus]	253	263	2	1237.72	0.00357563	2.88889	2	20	0.1	164.277	0.0130247	2.01302	FALSE	TRUE	263	191	71.7481
F:\25-03-2022\20220324-SAMPLE BROTH-POS-00.d	4739	scanId=2690806		44.8466	599.379	5238.92	2	1196.74	197	17719.4	R.IQLIREVAQK.L	IQLIREVAQK	WP_058843384.1 MULTISPECIES: pyruvate kinase [Lysinibacillus]	47	56	1	1196.72	0.0187197	15.6425	2	18	0.111111	229.105	0.0129296	2.01293	TRUE	FALSE	264	191	71.7481
F:\25-03-2022\20220324-SAMPLE BROTH-POS-00.d	4655	scanId=2654636		44.2438	672.41	94181	2	1342.81	262	33007.1	R.GSVIPLFIEQIK.A	GSVIPLFIEQIK	WP_036162823.1 MULTISPECIES: polysaccharide biosynthesis protein [Lysinibacillus]	172	183	0	1342.79	0.0201432	15.001	2	22	0.0909091	424.644	0.0128652	2.01287	TRUE	FALSE	265	191	71.7481
F:\25-03-2022\20220324-SAMPLE BROTH-POS-00.d	4568	scanId=2619114		43.6518	1124.08	1725.44	2	2246.15	144	12090	R.VTSLEAALENLVSEM(oxidation of M)ELVKR.E	VTSLEAALENLVSEMELVKR	DECOY_WP_053597075.1 MULTISPECIES: DNA repair protein RecN [Lysinibacillus]	196	215	1	2246.18	-0.0321841	-14.3284	2	38	0.0526316	148.018	0.012243	2.01224	FALSE	TRUE	265	192	72.1237
F:\25-03-2022\20220324-SAMPLE BROTH-POS-00.d	3014	scanId=1711067		28.5176	544.789	1616.72	2	1087.56	53	3822.59	R.ENRVIAMQK.S	ENRVIAMQK	DECOY_WP_012292662.1 MULTISPECIES: hydroxymethylglutaryl-CoA lyase [Lysinibacillus]	8	16	1	1087.58	-0.0165429	-15.2107	2	16	0.125	46.2977	0.0121116	2.01211	FALSE	TRUE	265	193	72.3292
F:\25-03-2022\20220324-SAMPLE BROTH-POS-00.d	4657	scanId=2654896		44.2481	652.874	36080.1	2	1303.73	194	20872.7	K.TLEKSKPWSTK.R	TLEKSKPWSTK	DECOY_WP_025116455.1 MULTISPECIES: preprotein translocase subunit SecE [Lysinibacillus]	36	46	1	1303.71	0.0199489	15.3016	2	20	0.1	251.471	0.0120478	2.01205	FALSE	TRUE	265	194	72.3292
F:\25-03-2022\20220324-SAMPLE BROTH-POS-00.d	4057	scanId=2329223		38.8203	982.491	523.885	2	1962.97	41	2556.13	M.QFQQTDNQKPLEQFGR.N	QFQQTDNQKPLEQFGR	WP_012292950.1 MULTISPECIES: AAA family ATPase [Lysinibacillus]	2	17	0	1962.95	0.0125406	6.38866	2	30	0.0666667	30.4833	0.0119256	2.01193	TRUE	FALSE	266	194	72.3292
F:\25-03-2022\20220324-SAMPLE BROTH-POS-00.d	4688	scanId=2666483		44.4412	762.938	6066.63	2	1523.86	312	26401.8	K.QLLTEAEGKVVPIK.K	QLLTEAEGKVVPIK	WP_012292938.1 MULTISPECIES: helicase-exonuclease AddAB subunit AddA [Lysinibacillus]	1107	1120	1	1523.89	-0.030406	-19.9528	2	26	0.0769231	311.267	0.0117896	2.01179	TRUE	FALSE	267	194	72.3292
F:\25-03-2022\20220324-SAMPLE BROTH-POS-00.d	4617	scanId=2639284		43.9879	597.856	9788.02	2	1193.7	177	15961.7	K.TSKVYLKNNK.G	TSKVYLKNNK	DECOY_WP_012292261.1 MULTISPECIES: site-specific integrase [Lysinibacillus]	135	144	2	1193.68	0.0206431	17.2937	2	18	0.111111	180.813	0.0113279	2.01133	FALSE	TRUE	267	195	72.6612
F:\25-03-2022\20220324-SAMPLE BROTH-POS-00.d	4814	scanId=2734483		45.5746	1039.65	2339.11	2	2077.28	168	11147.2	K.AAEITWAILPKGALLRINK.G	AAEITWAILPKGALLRINK	DECOY_WP_216486513.1 MULTISPECIES: acylneuraminate cytidylyltransferase family protein [Lysinibacillus]	190	208	2	2077.24	0.0347306	16.7196	2	36	0.0555556	124.762	0.0111923	2.01119	FALSE	TRUE	267	196	72.6612
F:\25-03-2022\20220324-SAMPLE BROTH-POS-00.d	5053	scanId=2871400		47.8565	569.29	2777	2	1136.57	191	19043.5	K.EKILMM(oxidation of M)SNR.I	EKILMMSNR	DECOY_WP_012294202.1 MULTISPECIES: MarR family winged helix-turn-helix transcriptional regulator [Lysinibacillus]	9	17	1	1136.57	-0.00257703	-2.26738	2	16	0.125	213.103	0.0111904	2.01119	FALSE	TRUE	267	197	72.6612
F:\25-03-2022\20220324-SAMPLE BROTH-POS-00.d	4574	scanId=2621755		43.6958	606.37	5339.01	2	1210.72	194	17164.8	R.LKQFPPKPEK.D	LKQFPPKPEK	WP_012292053.1 MULTISPECIES: SpoVR family protein [Lysinibacillus]	207	216	1	1210.71	0.0173165	14.3028	2	18	0.111111	188.75	0.0109963	2.011	TRUE	FALSE	268	197	72.6612
F:\25-03-2022\20220324-SAMPLE BROTH-POS-00.d	4769	scanId=2708667		45.1443	584.368	2881.83	2	1166.72	198	18382.7	R.VPEELRIALK.K	VPEELRIALK	DECOY_WP_051563193.1 MULTISPECIES: serine hydrolase [Lysinibacillus]	50	59	1	1166.7	0.0186416	15.978	2	18	0.111111	199.367	0.0108454	2.01085	FALSE	TRUE	268	198	72.6612
F:\25-03-2022\20220324-SAMPLE BROTH-POS-00.d	4749	scanId=2696262		44.9376	731.459	11435.2	2	1460.9	265	24233.2	R.KSYVIFILLHTK.D	KSYVIFILLHTK	WP_217581670.1 MULTISPECIES: PucR family transcriptional regulator ligand-binding domain-containing protein [Lysinibacillus]	337	348	1	1460.88	0.0277735	19.0116	2	22	0.0909091	261.465	0.0107895	2.01079	TRUE	FALSE	269	198	72.6612
F:\25-03-2022\20220324-SAMPLE BROTH-POS-00.d	4608	scanId=2635329		43.922	589.317	5665.37	2	1176.62	125	16151	K.GPKSSIRAM(oxidation of M)SK.R	GPKSSIRAMSK	DECOY_WP_126659563.1 MULTISPECIES: ribosome biogenesis GTP-binding protein YihA/YsxC [Lysinibacillus]	138	148	2	1176.63	-0.00966254	-8.21205	2	20	0.1	168.65	0.0104421	2.01044	FALSE	TRUE	269	199	72.6612
F:\25-03-2022\20220324-SAMPLE BROTH-POS-00.d	4927	scanId=2800152		46.6691	737.962	2719.98	2	1473.91	190	17797.9	K.LIM(oxidation of M)VLVAVFVVKK.R	LIMVLVAVFVVKK	WP_012294062.1 MULTISPECIES: hypothetical protein [Lysinibacillus]	46	58	1	1473.94	-0.0258799	-17.5583	2	24	0.0833333	182.748	0.010268	2.01027	TRUE	FALSE	270	199	72.6612
F:\25-03-2022\20220324-SAMPLE BROTH-POS-00.d	4623	scanId=2641791		44.0297	584.358	47013.2	2	1166.7	187	20597.1	K.FKRYLSILK.W	FKRYLSILK	DECOY_WP_012292841.1 MULTISPECIES: tyrosine-type recombinase/integrase [Lysinibacillus]	4	12	2	1166.72	-0.016611	-14.2374	2	16	0.125	210.272	0.0102088	2.01021	FALSE	TRUE	270	200	72.6612
F:\25-03-2022\20220324-SAMPLE BROTH-POS-00.d	4592	scanId=2629495		43.8248	584.357	32938.2	2	1166.7	258	31429.1	K.LKEINNPVIK.E	LKEINNPVIK	WP_012292397.1 MULTISPECIES: ornithine--oxo-acid transaminase [Lysinibacillus]	323	332	1	1166.7	-0.0038421	-3.29313	2	18	0.111111	316.807	0.0100801	2.01008	TRUE	FALSE	271	200	72.6612
F:\25-03-2022\20220324-SAMPLE BROTH-POS-00.d	5706	scanId=3211057		53.5175	661.325	1029.32	2	1320.63	98	8133.86	K.M(oxidation of M)AIESLDKQDR.S	MAIESLDKQDR	WP_012293492.1 MULTISPECIES: Na/Pi cotransporter family protein [Lysinibacillus]	459	469	1	1320.63	0.000304738	0.230751	2	20	0.1	80.1488	0.00985372	2.00985	TRUE	FALSE	272	200	72.6612
F:\25-03-2022\20220324-SAMPLE BROTH-POS-00.d	4594	scanId=2630160		43.8359	628.381	7305.7	2	1254.75	227	20326.7	R.KIVRVEGQQAK.E	KIVRVEGQQAK	WP_031416178.1 MULTISPECIES: formate dehydrogenase accessory sulfurtransferase FdhD [Lysinibacillus]	8	18	2	1254.74	0.00690797	5.5055	2	20	0.1	198.901	0.00978519	2.00979	TRUE	FALSE	273	200	72.6612
F:\25-03-2022\20220324-SAMPLE BROTH-POS-00.d	4672	scanId=2660394		44.3398	660.86	4137.39	2	1319.71	219	20873.3	M.RVGVIMGGTSSEK.Q	RVGVIMGGTSSEK	WP_036162422.1 MULTISPECIES: D-alanine--D-alanine ligase [Lysinibacillus]	2	14	1	1319.69	0.0192772	14.6074	2	24	0.0833333	201.018	0.00963038	2.00963	TRUE	FALSE	274	200	72.6612
F:\25-03-2022\20220324-SAMPLE BROTH-POS-00.d	4538	scanId=2605009		43.4167	543.307	4123.27	2	1084.6	144	12437.9	R.QQQDKLLGR.V	QQQDKLLGR	DECOY_WP_036160398.1 MULTISPECIES: sel1 repeat family protein [Lysinibacillus]	368	376	1	1084.6	0.00136634	1.25976	2	16	0.125	118.694	0.0095429	2.00954	FALSE	TRUE	274	201	73.0245
F:\25-03-2022\20220324-SAMPLE BROTH-POS-00.d	4794	scanId=2723569		45.3927	951.59	3115.79	2	1901.16	224	16442.8	K.M(oxidation of M)LWALILFLLATIVLR.Y	MLWALILFLLATIVLR	DECOY_WP_036161361.1 MULTISPECIES: DMT family transporter [Lysinibacillus]	244	259	0	1901.16	0.00710405	3.7367	2	30	0.0666667	153.564	0.00933927	2.00934	FALSE	TRUE	274	202	73.3878
F:\25-03-2022\20220324-SAMPLE BROTH-POS-00.d	6026	scanId=3374189		56.2364	983.022	1126.25	2	1964.03	100	6097.82	R.VAEIALSFM(oxidation of M)GILDQRASK.S	VAEIALSFMGILDQRASK	DECOY_WP_031416973.1 MULTISPECIES: Na/Pi cotransporter family protein [Lysinibacillus]	81	98	1	1964.04	-0.00993631	-5.05912	2	34	0.0588235	56.8429	0.00932185	2.00932	FALSE	TRUE	274	203	73.4829
F:\25-03-2022\20220324-SAMPLE BROTH-POS-00.d	4679	scanId=2663015		44.3835	707.922	6392.26	2	1413.83	232	20971.8	K.LVNGVPSKTSALTK.E	LVNGVPSKTSALTK	WP_036162045.1 MULTISPECIES: S8 family serine peptidase [Lysinibacillus]	1058	1071	1	1413.82	0.00971401	6.87076	2	26	0.0769231	189.567	0.00903914	2.00904	TRUE	FALSE	275	203	73.4829
F:\25-03-2022\20220324-SAMPLE BROTH-POS-00.d	4661	scanId=2656218		44.2702	608.847	7979.65	2	1215.68	156	12713.6	K.MATVIPKTLDK.V	MATVIPKTLDK	DECOY_WP_036123458.1 MULTISPECIES: heme uptake protein IsdC [Lysinibacillus]	91	101	1	1215.69	-0.00981693	-8.07519	2	20	0.1	114.122	0.00897642	2.00898	FALSE	TRUE	275	204	73.8449
F:\25-03-2022\20220324-SAMPLE BROTH-POS-00.d	4580	scanId=2624257		43.7375	562.349	50107.8	2	1122.68	199	23756.1	R.RHLKTIEAR.M	RHLKTIEAR	DECOY_WP_012292993.1 MULTISPECIES: sn-glycerol-3-phosphate ABC transporter ATP-binding protein UgpC [Lysinibacillus]	185	193	2	1122.66	0.0205496	18.3043	2	16	0.125	202.698	0.00853247	2.00853	FALSE	TRUE	275	205	73.938
F:\25-03-2022\20220324-SAMPLE BROTH-POS-00.d	4700	scanId=2670871		44.5144	784.95	6887.53	2	1567.89	294	23553.9	K.IISFLPFSAYLIGK.S	IISFLPFSAYLIGK	WP_227256914.1 MULTISPECIES: acyltransferase family protein [Lysinibacillus]	312	325	0	1567.9	-0.0157786	-10.0635	2	26	0.0769231	196.646	0.00834877	2.00835	TRUE	FALSE	276	205	73.938
F:\25-03-2022\20220324-SAMPLE BROTH-POS-00.d	4472	scanId=2568226		42.8036	518.316	3769.94	2	1034.62	99	8601.82	R.GVGIRAPTHK.K	GVGIRAPTHK	DECOY_WP_012293767.1 MULTISPECIES: ethanolamine ammonia-lyase subunit EutC [Lysinibacillus]	218	227	1	1034.6	0.0180516	17.4479	2	18	0.111111	71.5978	0.00832355	2.00832	FALSE	TRUE	276	206	74.2987
F:\25-03-2022\20220324-SAMPLE BROTH-POS-00.d	4933	scanId=2803920		46.7319	781.989	2994.3	2	1561.96	218	20492.1	K.LLAQIVPVIRAIEK.E	LLAQIVPVIRAIEK	DECOY_WP_012291905.1 MULTISPECIES: dihydropteroate synthase [Lysinibacillus]	193	206	1	1561.99	-0.0284976	-18.2444	2	26	0.0769231	166.941	0.00814659	2.00815	FALSE	TRUE	276	207	74.6593
F:\25-03-2022\20220324-SAMPLE BROTH-POS-00.d	4779	scanId=2714651		45.2441	628.383	2960.73	2	1254.75	219	19881.7	K.ALLRAQEISVR.R	ALLRAQEISVR	DECOY_WP_031419281.1 MULTISPECIES: phosphoribosylanthranilate isomerase [Lysinibacillus]	160	170	1	1254.74	0.0110259	8.78738	2	20	0.1	160.288	0.00806212	2.00806	FALSE	TRUE	276	208	75.02
F:\25-03-2022\20220324-SAMPLE BROTH-POS-00.d	4676	scanId=2662196		44.3698	694.423	92850.7	2	1386.83	293	31960.3	R.VVIATKAQLGM(oxidation of M)LK.K	VVIATKAQLGMLK	DECOY_WP_012291848.1 MULTISPECIES: heavy metal translocating P-type ATPase [Lysinibacillus]	501	513	1	1386.83	0.0052383	3.77718	2	24	0.0833333	251.48	0.00786851	2.00787	FALSE	TRUE	276	209	75.1086
F:\25-03-2022\20220324-SAMPLE BROTH-POS-00.d	4627	scanId=2642826		44.047	575.844	6153.92	2	1149.67	170	14711.6	K.EIRTLLFMK.R	EIRTLLFMK	WP_036162327.1 MULTISPECIES: DMT family transporter [Lysinibacillus]	289	297	1	1149.66	0.0152086	13.2288	2	16	0.125	115.505	0.00785131	2.00785	TRUE	FALSE	277	209	75.1086
F:\25-03-2022\20220324-SAMPLE BROTH-POS-00.d	4530	scanId=2600911		43.3484	545.287	3863.07	2	1088.56	88	7414.08	K.EVGADTLTVGK.T	EVGADTLTVGK	DECOY_WP_036225924.1 MULTISPECIES: preprotein translocase subunit SecA [Lysinibacillus]	571	581	0	1088.57	-0.0117122	-10.7593	2	20	0.1	55.4805	0.00748312	2.00748	FALSE	TRUE	277	210	75.1604
F:\25-03-2022\20220324-SAMPLE BROTH-POS-00.d	4719	scanId=2680519		44.6752	804.487	7099.02	2	1606.96	273	22154.8	K.VIHAKPLFALITER.C	VIHAKPLFALITER	DECOY_WP_012293882.1 MULTISPECIES: carbohydrate kinase [Lysinibacillus]	126	139	0	1606.96	0.00269417	1.67657	2	26	0.0769231	162.176	0.00732014	2.00732	FALSE	TRUE	277	211	75.1604
F:\25-03-2022\20220324-SAMPLE BROTH-POS-00.d	4450	scanId=2556094		42.6014	386.241	1857.96	2	770.467	68	6978.04	K.VGNLIAGK.E	VGNLIAGK	WP_012296182.1 MULTISPECIES: PLP-dependent aminotransferase family protein [Lysinibacillus]	95	102	0	770.465	0.00232252	3.01444	2	14	0.142857	49.0489	0.00702904	2.00703	TRUE	FALSE	278	211	75.1604
F:\25-03-2022\20220324-SAMPLE BROTH-POS-00.d	4722	scanId=2682236		44.7038	601.86	6179.99	2	1201.7	266	23861.4	K.LTSAIKEELAK.F	LTSAIKEELAK	WP_012293325.1 MULTISPECIES: insulinase family protein [Lysinibacillus]	335	345	1	1201.69	0.0130508	10.8604	2	20	0.1	158.831	0.00665642	2.00666	TRUE	FALSE	279	211	75.1604
F:\25-03-2022\20220324-SAMPLE BROTH-POS-00.d	4761	scanId=2703850		45.064	797.497	5862.78	2	1592.98	272	21819.7	K.LKELSGAPALLEPKK.T	LKELSGAPALLEPKK	DECOY_WP_012295386.1 MULTISPECIES: U32 family peptidase [Lysinibacillus]	391	405	2	1592.95	0.0302853	19.0121	2	28	0.0714286	138.275	0.00633715	2.00634	FALSE	TRUE	279	212	75.1604
F:\25-03-2022\20220324-SAMPLE BROTH-POS-00.d	4727	scanId=2684498		44.7415	643.406	19855.2	2	1284.8	223	23625.7	R.TKQGTGLGLAIVK.Q	TKQGTGLGLAIVK	WP_036160583.1 MULTISPECIES: HAMP domain-containing histidine kinase [Lysinibacillus]	415	427	1	1284.78	0.0208122	16.1991	2	24	0.0833333	146.902	0.00621788	2.00622	TRUE	FALSE	280	212	75.1604
F:\25-03-2022\20220324-SAMPLE BROTH-POS-00.d	4699	scanId=2670538		44.5088	740.927	12310.7	2	1479.84	291	27241	R.ALINISHSLPIM(oxidation of M)R.E	ALINISHSLPIMR	DECOY_WP_031418633.1 MULTISPECIES: ATP-binding protein [Lysinibacillus]	356	368	0	1479.82	0.0170152	11.4981	2	24	0.0833333	168.44	0.00618331	2.00618	FALSE	TRUE	280	213	75.1604
F:\25-03-2022\20220324-SAMPLE BROTH-POS-00.d	4651	scanId=2652834		44.2138	682.873	2979.67	2	1363.73	226	19662.1	K.FAFPRILESER.L	FAFPRILESER	DECOY_WP_036160873.1 MULTISPECIES: SDR family oxidoreductase [Lysinibacillus]	209	219	1	1363.72	0.00682757	5.00656	2	20	0.1	118.327	0.00601805	2.00602	FALSE	TRUE	280	214	75.1604
F:\25-03-2022\20220324-SAMPLE BROTH-POS-00.d	4694	scanId=2668531		44.4754	804.488	8169.37	2	1606.96	348	28697.7	K.AYVTVKAELSKGITK.A	AYVTVKAELSKGITK	DECOY_WP_174804715.1 MULTISPECIES: isoleucine--tRNA ligase [Lysinibacillus]	88	102	2	1606.93	0.031378	19.5267	2	28	0.0714286	170.122	0.00592806	2.00593	FALSE	TRUE	280	215	75.1604
F:\25-03-2022\20220324-SAMPLE BROTH-POS-00.d	4660	scanId=2655886		44.2646	619.872	6310.3	2	1237.73	195	16194.2	K.NFLKSIFGGKK.E	NFLKSIFGGKK	DECOY_WP_036161284.1 MULTISPECIES: toxic anion resistance protein [Lysinibacillus]	253	263	2	1237.72	0.0116356	9.40084	2	20	0.1	95.4038	0.00589122	2.00589	FALSE	TRUE	280	216	75.1604
F:\25-03-2022\20220324-SAMPLE BROTH-POS-00.d	5026	scanId=2856372		47.6061	555.282	3032.22	2	1108.55	242	26284.6	K.KVVEQM(oxidation of M)FGR.I	KVVEQMFGR	DECOY_WP_012291979.1 MULTISPECIES: methionine synthase [Lysinibacillus]	743	751	1	1108.57	-0.0200942	-18.1263	2	16	0.125	149.853	0.00570117	2.0057	FALSE	TRUE	280	217	75.1604
F:\25-03-2022\20220324-SAMPLE BROTH-POS-00.d	4678	scanId=2662682		44.3779	782.477	7550.67	2	1562.94	326	31179.9	K.SEIPLTIIRPGIVR.G	SEIPLTIIRPGIVR	WP_036160873.1 MULTISPECIES: SDR family oxidoreductase [Lysinibacillus]	174	187	0	1562.95	-0.0115603	-7.39645	2	26	0.0769231	177.217	0.00568368	2.00568	TRUE	FALSE	281	217	75.1604
F:\25-03-2022\20220324-SAMPLE BROTH-POS-00.d	4630	scanId=2644405		44.0733	467.303	22812	2	932.59	177	25348.9	R.LLTKLMSK.E	LLTKLMSK	WP_012295691.1 MULTISPECIES: catabolite control protein A [Lysinibacillus]	304	311	1	932.573	0.0176165	18.8902	2	14	0.142857	143.178	0.00564828	2.00565	TRUE	FALSE	282	217	75.1604
F:\25-03-2022\20220324-SAMPLE BROTH-POS-00.d	4529	scanId=2600578		43.3428	540.331	12954.4	2	1078.65	184	19443.3	K.QVHLIWKR.T	QVHLIWKR	DECOY_WP_012292261.1 MULTISPECIES: site-specific integrase [Lysinibacillus]	70	77	1	1078.64	0.0083349	7.72723	2	14	0.142857	106.565	0.0054808	2.00548	FALSE	TRUE	282	218	75.1604
F:\25-03-2022\20220324-SAMPLE BROTH-POS-00.d	4671	scanId=2660061		44.3342	531.325	5084.58	2	1060.64	211	18772.7	R.NIMKLLTTK.G	NIMKLLTTK	DECOY_WP_012293945.1 MULTISPECIES: ABC transporter ATP-binding protein [Lysinibacillus]	270	278	1	1060.63	0.00470556	4.43657	2	16	0.125	101.256	0.0053938	2.00539	FALSE	TRUE	282	219	75.1604
F:\25-03-2022\20220324-SAMPLE BROTH-POS-00.d	4773	scanId=2711436		45.1905	863.535	2689.66	2	1725.06	230	18283.8	-.MQNKKVVLIVVDALR.F	MQNKKVVLIVVDALR	WP_012293346.1 MULTISPECIES: alkaline phosphatase family protein [Lysinibacillus]	1	15	2	1725.03	0.0215308	12.4814	2	28	0.0714286	98.4962	0.00538709	2.00539	TRUE	FALSE	283	219	75.1604
F:\25-03-2022\20220324-SAMPLE BROTH-POS-00.d	4690	scanId=2667652		44.4607	738.449	52156	2	1474.88	323	33690	K.VEKQVAILYALTK.G	VEKQVAILYALTK	WP_012292766.1 MULTISPECIES: F0F1 ATP synthase subunit alpha [Lysinibacillus]	430	442	1	1474.88	0.00828026	5.61421	2	24	0.0833333	176.494	0.00523878	2.00524	TRUE	FALSE	284	219	75.1604
F:\25-03-2022\20220324-SAMPLE BROTH-POS-00.d	4736	scanId=2689089		44.818	584.355	2511.96	2	1166.7	200	16763.9	K.LKEINNPVIK.E	LKEINNPVIK	WP_012292397.1 MULTISPECIES: ornithine--oxo-acid transaminase [Lysinibacillus]	323	332	1	1166.7	-0.00673071	-5.769	2	18	0.111111	83.8754	0.00500332	2.005	TRUE	FALSE	285	219	75.1604
F:\25-03-2022\20220324-SAMPLE BROTH-POS-00.d	4804	scanId=2729552		45.4924	517.833	8823.17	2	1033.65	308	36352.2	K.KTIFTIALK.R	KTIFTIALK	WP_012292501.1 MULTISPECIES: sensor histidine kinase [Lysinibacillus]	299	307	1	1033.65	-0.00289126	-2.79712	2	16	0.125	181.283	0.00498685	2.00499	TRUE	FALSE	286	219	75.1604
F:\25-03-2022\20220324-SAMPLE BROTH-POS-00.d	4949	scanId=2813453		46.8907	557.849	4072.45	2	1113.68	254	25612.2	R.ILDVVVESLK.K	ILDVVVESLK	WP_012292683.1 MULTISPECIES: aspartate aminotransferase family protein [Lysinibacillus]	439	448	0	1113.66	0.0193507	17.3757	2	18	0.111111	124.511	0.00486139	2.00486	TRUE	FALSE	287	219	75.1604
F:\25-03-2022\20220324-SAMPLE BROTH-POS-00.d	4545	scanId=2608776		43.4795	1206.12	2674.92	2	2410.22	167	11369.1	K.LFGLQLEEPRMAFVDNFTQR.F	LFGLQLEEPRMAFVDNFTQR	DECOY_WP_012293022.1 MULTISPECIES: B12-binding domain-containing radical SAM protein [Lysinibacillus]	223	242	1	2410.21	0.00517863	2.14862	2	38	0.0526316	50.2999	0.00442426	2.00442	FALSE	TRUE	287	220	75.1604
F:\25-03-2022\20220324-SAMPLE BROTH-POS-00.d	4708	scanId=2674792		44.5797	782.475	19085.9	2	1562.94	319	28189.4	K.SEIPLTIIRPGIVR.G	SEIPLTIIRPGIVR	WP_036160873.1 MULTISPECIES: SDR family oxidoreductase [Lysinibacillus]	174	187	0	1562.95	-0.0156895	-10.0384	2	26	0.0769231	115.177	0.00408582	2.00409	TRUE	FALSE	288	220	75.1604
F:\25-03-2022\20220324-SAMPLE BROTH-POS-00.d	4673	scanId=2660727		44.3453	511.83	7442.6	2	1021.65	337	47011.9	K.KQALPKPLK.K	KQALPKPLK	WP_012293392.1 MULTISPECIES: sensor histidine kinase [Lysinibacillus]	95	103	1	1021.66	-0.0192159	-18.8084	2	16	0.125	177.518	0.00377603	2.00378	TRUE	FALSE	289	220	75.1604
F:\25-03-2022\20220324-SAMPLE BROTH-POS-00.d	5204	scanId=2951835		49.1971	486.308	2402.78	2	970.601	161	16190.4	K.INQLSLKR.D	INQLSLKR	WP_012292903.1 MULTISPECIES: DUF115 domain-containing protein [Lysinibacillus]	139	146	1	970.592	0.00906819	9.34295	2	14	0.142857	58.5189	0.00361441	2.00361	TRUE	FALSE	290	220	75.1604
F:\25-03-2022\20220324-SAMPLE BROTH-POS-00.d	4711	scanId=2676509		44.6084	599.883	6638.13	2	1197.75	357	38714	K.LLSPKSLTLAR.A	LLSPKSLTLAR	DECOY_WP_241744842.1 MULTISPECIES: S-layer homology domain-containing protein [Lysinibacillus]	162	172	1	1197.74	0.00652229	5.44548	2	20	0.1	136.529	0.00352662	2.00353	FALSE	TRUE	290	221	75.1604
F:\25-03-2022\20220324-SAMPLE BROTH-POS-00.d	6244	scanId=3486165		58.1026	565.334	1791.06	2	1128.65	144	13464.1	K.AIEVITQIDK.L	AIEVITQIDK	DECOY_WP_031416518.1 MULTISPECIES: MurR/RpiR family transcriptional regulator [Lysinibacillus]	89	98	0	1128.64	0.0149018	13.2033	2	18	0.111111	45.4357	0.00337457	2.00337	FALSE	TRUE	290	222	75.1604
F:\25-03-2022\20220324-SAMPLE BROTH-POS-00.d	4884	scanId=2775325		46.2553	693.939	5218.67	2	1385.86	309	34660.9	K.KVVLETLLGMKR.A	KVVLETLLGMKR	WP_012295480.1 MULTISPECIES: porphobilinogen synthase [Lysinibacillus]	294	305	2	1385.84	0.0212239	15.3148	2	22	0.0909091	116.106	0.00334977	2.00335	TRUE	FALSE	291	222	75.1604
F:\25-03-2022\20220324-SAMPLE BROTH-POS-00.d	4805	scanId=2729885		45.498	506.826	9069.59	2	1011.64	277	34062.2	R.IAGAILVDIK.A	IAGAILVDIK	WP_012292711.1 MULTISPECIES: PBP1A family penicillin-binding protein [Lysinibacillus]	109	118	0	1011.63	0.00471284	4.65864	2	18	0.111111	99.2742	0.0029145	2.00291	TRUE	FALSE	292	222	75.1604
F:\25-03-2022\20220324-SAMPLE BROTH-POS-00.d	4901	scanId=2785408		46.4233	726.959	4365.57	2	1451.9	262	24784.7	R.LDVILVVARLVSR.A	LDVILVVARLVSR	DECOY_WP_126659563.1 MULTISPECIES: ribosome biogenesis GTP-binding protein YihA/YsxC [Lysinibacillus]	80	92	1	1451.92	-0.0160952	-11.0855	2	24	0.0833333	68.3574	0.00275805	2.00276	FALSE	TRUE	292	223	75.1604
F:\25-03-2022\20220324-SAMPLE BROTH-POS-00.d	4621	scanId=2640615		44.0101	567.33	3187.59	2	1132.64	134	13314.3	R.EQLLPIHQR.A	EQLLPIHQR	DECOY_WP_031419287.1 MULTISPECIES: oligosaccharide flippase family protein [Lysinibacillus]	194	202	0	1132.64	0.00967369	8.54087	2	16	0.125	35.7259	0.00268328	2.00268	FALSE	TRUE	292	224	75.1604
F:\25-03-2022\20220324-SAMPLE BROTH-POS-00.d	4692	scanId=2667977		44.4661	672.409	21348.5	2	1342.8	197	19115.6	K.GIQAIGFPTRKR.M	GIQAIGFPTRKR	DECOY_WP_012295244.1 MULTISPECIES: glycine--tRNA ligase [Lysinibacillus]	262	273	2	1342.78	0.0209054	15.5687	2	22	0.0909091	48.4625	0.00253524	2.00254	FALSE	TRUE	292	225	75.1604
F:\25-03-2022\20220324-SAMPLE BROTH-POS-00.d	4793	scanId=2723237		45.3871	484.814	8209.2	2	967.614	277	33189.3	K.LSPVVQVVK.G	LSPVVQVVK	WP_012292015.1 MULTISPECIES: amidophosphoribosyltransferase [Lysinibacillus]	340	348	0	967.607	0.00751424	7.7658	2	16	0.125	79.1353	0.00238436	2.00238	TRUE	FALSE	293	225	75.1604
F:\25-03-2022\20220324-SAMPLE BROTH-POS-00.d	4718	scanId=2680187		44.6696	621.393	16055.2	2	1240.77	217	24327.6	R.AVLGEKIGTVVR.R	AVLGEKIGTVVR	WP_012293293.1 MULTISPECIES: UMP kinase [Lysinibacillus]	227	238	1	1240.75	0.0214057	17.2522	2	22	0.0909091	55.6477	0.00228743	2.00229	TRUE	FALSE	294	225	75.1604
F:\25-03-2022\20220324-SAMPLE BROTH-POS-00.d	3370	scanId=1923775		32.0628	489.274	6311.83	2	976.534	86	10486.9	R.VFGKGGKER.I	VFGKGGKER	WP_012293406.1 MULTISPECIES: site-specific tyrosine recombinase XerD [Lysinibacillus]	171	179	2	976.545	-0.011901	-12.1869	2	16	0.125	16.2841	0.0015528	2.00155	TRUE	FALSE	295	225	75.1604
F:\25-03-2022\20220324-SAMPLE BROTH-POS-00.d	4610	scanId=2636536		43.9421	606.37	32469.3	2	1210.73	241	27723.4	K.IVYHTKPVVR.Y	IVYHTKPVVR	WP_036162792.1 MULTISPECIES: non-ribosomal peptide synthetase [Lysinibacillus]	1228	1237	0	1210.72	0.00753417	6.22289	2	18	0.111111	42.3712	0.00152836	2.00153	TRUE	FALSE	296	225	75.1604
F:\25-03-2022\20220324-SAMPLE BROTH-POS-00.d	4656	scanId=2654749		44.2457	628.384	55418.2	2	1254.75	207	22950.9	R.AKIAEIQARQK.L	AKIAEIQARQK	WP_048391396.1 MULTISPECIES: tRNA (adenosine(37)-N6)-dimethylallyltransferase MiaA [Lysinibacillus]	89	99	2	1254.74	0.0123795	9.86618	2	20	0.1	30.169	0.0013145	2.00131	TRUE	FALSE	297	225	75.1604
F:\25-03-2022\20220324-SAMPLE BROTH-POS-00.d	1396	scanId=756901		12.6149	426.213	577.455	2	850.411	28	2458.83	R.IVESM(oxidation of M)EK.N	IVESMEK	WP_036160608.1 MULTISPECIES: methyl-accepting chemotaxis protein [Lysinibacillus]	74	80	0	850.411	0.000479243	0.563543	1	12	0.0833333	612.712	0.249188	1.24919	TRUE	FALSE	298	225	75.1604
F:\25-03-2022\20220324-SAMPLE BROTH-POS-00.d	1694	scanId=928249		15.4707	689.344	499.319	2	1376.67	17	969.326	R.GVMFFTAKADYK.Q	GVMFFTAKADYK	DECOY_WP_036161931.1 MULTISPECIES: polysaccharide deacetylase family protein [Lysinibacillus]	148	159	1	1376.68	-0.00614914	-4.46664	1	22	0.0454545	193.787	0.199919	1.19992	FALSE	TRUE	298	226	75.4945
F:\25-03-2022\20220324-SAMPLE BROTH-POS-00.d	1134	scanId=608483		10.1412	759.923	301.025	2	1517.83	11	314.225	K.TKEM(oxidation of M)GPTTVKIAAR.R	TKEMGPTTVKIAAR	DECOY_WP_012292930.1 MULTISPECIES: PDZ domain-containing protein [Lysinibacillus]	218	231	2	1517.82	0.00820019	5.4026	1	26	0.0384615	60.7936	0.193471	1.19347	FALSE	TRUE	298	227	75.5377
F:\25-03-2022\20220324-SAMPLE BROTH-POS-00.d	3699	scanId=2116112		35.2684	635.346	622.306	2	1268.68	45	2648.69	K.IPQWNDIKQK.N	IPQWNDIKQK	DECOY_WP_036160386.1 MULTISPECIES: S-layer homology domain-containing protein [Lysinibacillus]	258	267	1	1268.69	-0.0108032	-8.51529	1	18	0.0555556	488.125	0.184289	1.18429	FALSE	TRUE	298	228	75.5377
F:\25-03-2022\20220324-SAMPLE BROTH-POS-00.d	2596	scanId=1462242		24.3706	887.951	422.945	2	1773.89	29	1904.58	R.VLEQEQASLQMDIDR.C	VLEQEQASLQMDIDR	WP_036160485.1 MULTISPECIES: AAA family ATPase [Lysinibacillus]	748	762	0	1773.86	0.0310583	17.5089	1	28	0.0357143	316.735	0.166302	1.1663	TRUE	FALSE	299	228	75.5377
F:\25-03-2022\20220324-SAMPLE BROTH-POS-00.d	1861	scanId=1025899		17.0982	754.368	432.561	2	1506.72	17	1064	R.GGEGRASESM(oxidation of M)LRNK.D	GGEGRASESMLRNK	DECOY_WP_012295562.1 MULTISPECIES: succinate dehydrogenase flavoprotein subunit [Lysinibacillus]	328	341	2	1506.72	0.000193351	0.128326	1	26	0.0384615	167.487	0.157413	1.15741	FALSE	TRUE	299	229	75.5377
F:\25-03-2022\20220324-SAMPLE BROTH-POS-00.d	1364	scanId=738603		12.3099	415.702	496.34	2	829.389	45	3977.46	K.QHM(oxidation of M)KDR.I	QHMKDR	DECOY_WP_079561670.1 MULTISPECIES: TIGR01212 family radical SAM protein [Lysinibacillus]	235	240	1	829.386	0.00297041	3.58145	1	10	0.1	619.813	0.155831	1.15583	FALSE	TRUE	299	230	75.5377
F:\25-03-2022\20220324-SAMPLE BROTH-POS-00.d	3728	scanId=2133127		35.552	637.833	957.322	2	1273.65	34	2387.95	K.VLPELNDEFAK.E	VLPELNDEFAK	WP_012295491.1 MULTISPECIES: trigger factor [Lysinibacillus]	247	257	0	1273.66	-0.00309003	-2.42611	1	20	0.05	364.131	0.152487	1.15249	TRUE	FALSE	300	230	75.5377
F:\25-03-2022\20220324-SAMPLE BROTH-POS-00.d	2619	scanId=1476314		24.6051	576.27	561.02	2	1150.52	24	1444.98	R.QEITEGEAM(oxidation of M)K.L	QEITEGEAMK	DECOY_WP_012296004.1 MULTISPECIES: DUF4179 domain-containing protein [Lysinibacillus]	502	511	0	1150.52	0.00715604	6.21985	1	18	0.0555556	219.82	0.152127	1.15213	FALSE	TRUE	300	231	75.5377
F:\25-03-2022\20220324-SAMPLE BROTH-POS-00.d	2974	scanId=1687914		28.1318	349.181	1132.94	2	696.348	34	3107.34	K.YKGSDK.L	YKGSDK	DECOY_WP_233732737.1 MULTISPECIES: nickel ABC transporter substrate-binding protein [Lysinibacillus]	266	271	1	696.344	0.00382984	5.49992	1	10	0.1	460.74	0.148274	1.14827	FALSE	TRUE	300	232	75.5377
F:\25-03-2022\20220324-SAMPLE BROTH-POS-00.d	1983	scanId=1097280		18.2879	749.383	375.175	2	1496.75	15	1285.21	K.MRDGKWYVVTDK.W	MRDGKWYVVTDK	WP_012295399.1 MULTISPECIES: phosphoribosylformimino-5-aminoimidazole carboxamide ribotide isomerase [Lysinibacillus]	137	148	2	1496.74	0.00638932	4.26881	1	22	0.0454545	167.711	0.130492	1.13049	TRUE	FALSE	301	232	75.5377
F:\25-03-2022\20220324-SAMPLE BROTH-POS-00.d	1652	scanId=903698		15.0615	653.811	312.603	2	1305.61	28	1811.46	K.HHLEHDDYLK.E	HHLEHDDYLK	WP_012292559.1 MULTISPECIES: SNF2-related protein [Lysinibacillus]	241	250	0	1305.61	-0.0022082	-1.69132	1	18	0.0555556	225.058	0.124241	1.12424	TRUE	FALSE	302	232	75.5377
F:\25-03-2022\20220324-SAMPLE BROTH-POS-00.d	3003	scanId=1704533		28.4088	748.36	371.081	2	1494.71	16	1120.71	R.GQKGTVMDDKNFR.S	GQKGTVMDDKNFR	WP_036161340.1 MULTISPECIES: hypothetical protein [Lysinibacillus]	308	320	2	1494.72	-0.0187401	-12.5375	1	24	0.0416667	136.362	0.121675	1.12168	TRUE	FALSE	303	232	75.5377
F:\25-03-2022\20220324-SAMPLE BROTH-POS-00.d	2614	scanId=1473211		24.5534	653.332	351.244	2	1304.65	27	2175.9	K.GDEAVMKRMIR.R	GDEAVMKRMIR	WP_036161772.1 MULTISPECIES: TatD family hydrolase [Lysinibacillus]	154	164	2	1304.67	-0.0199765	-15.3115	1	20	0.05	262.25	0.120525	1.12052	TRUE	FALSE	304	232	75.5377
F:\25-03-2022\20220324-SAMPLE BROTH-POS-00.d	3580	scanId=2044636		34.0771	858.949	867.821	2	1715.88	55	3756.17	K.KTAM(oxidation of M)LDAYQDIYLR.R	KTAMLDAYQDIYLR	DECOY_WP_012292453.1 MULTISPECIES: VanZ family protein [Lysinibacillus]	4	17	1	1715.86	0.0287945	16.7814	1	26	0.0384615	448.21	0.119327	1.11933	FALSE	TRUE	304	233	75.5377
F:\25-03-2022\20220324-SAMPLE BROTH-POS-00.d	3740	scanId=2139775		35.6628	614.345	644.752	2	1226.68	24	1759.16	R.NINRNLENLK.Q	NINRNLENLK	WP_012293588.1 MULTISPECIES: methyl-accepting chemotaxis protein [Lysinibacillus]	222	231	1	1226.67	0.00224929	1.83365	1	18	0.0555556	208.716	0.118646	1.11865	TRUE	FALSE	305	233	75.5377
F:\25-03-2022\20220324-SAMPLE BROTH-POS-00.d	3668	scanId=2097272		34.9544	702.354	516.769	2	1402.69	30	1979.05	R.AAEVGLYYNFEK.M	AAEVGLYYNFEK	WP_012295881.1 MULTISPECIES: DsbA family oxidoreductase [Lysinibacillus]	81	92	0	1402.68	0.0167534	11.9439	1	22	0.0454545	234.011	0.118244	1.11824	TRUE	FALSE	306	233	75.5377
F:\25-03-2022\20220324-SAMPLE BROTH-POS-00.d	3286	scanId=1873578		31.2262	684.34	376.025	2	1366.67	32	2090.57	K.KHSMTLGFFSGR.V	KHSMTLGFFSGR	DECOY_WP_036162469.1 MULTISPECIES: gluconokinase [Lysinibacillus]	142	153	1	1366.68	-0.0159561	-11.675	1	22	0.0454545	243.943	0.116687	1.11669	FALSE	TRUE	306	234	75.5377
F:\25-03-2022\20220324-SAMPLE BROTH-POS-00.d	2169	scanId=1205567		20.0926	546.322	663.403	2	1090.63	36	2629.4	K.SLFVVENRK.K	SLFVVENRK	DECOY_WP_012295082.1 MULTISPECIES: site-specific integrase [Lysinibacillus]	87	95	1	1090.61	0.0167213	15.332	1	16	0.0625	306.455	0.11655	1.11655	FALSE	TRUE	306	235	75.5377
F:\25-03-2022\20220324-SAMPLE BROTH-POS-00.d	3030	scanId=1721040		28.6839	978.514	383.252	2	1955.01	28	1713.35	K.GLQERGINTDNLRISNR.A	GLQERGINTDNLRISNR	WP_012296206.1 MULTISPECIES: adenylosuccinate synthase [Lysinibacillus]	85	101	2	1955.03	-0.0160821	-8.22602	1	32	0.03125	198.696	0.115969	1.11597	TRUE	FALSE	307	235	75.5377
F:\25-03-2022\20220324-SAMPLE BROTH-POS-00.d	2053	scanId=1138132		18.9687	522.253	504.126	2	1042.49	32	2368.53	R.KGPYEFM(oxidation of M)R.H	KGPYEFMR	WP_012295905.1 MULTISPECIES: isoprenylcysteine carboxyl methyltransferase family protein [Lysinibacillus]	110	117	1	1042.49	-2.6207e-05	-0.0251388	1	14	0.0714286	270.831	0.114345	1.11435	TRUE	FALSE	308	235	75.5377
F:\25-03-2022\20220324-SAMPLE BROTH-POS-00.d	1576	scanId=859952		14.3324	644.831	365.377	2	1287.65	35	2625.37	K.IENERDIIMR.L	IENERDIIMR	DECOY_WP_068983165.1 MULTISPECIES: type I DNA topoisomerase [Lysinibacillus]	512	521	1	1287.66	-0.013808	-10.7233	1	18	0.0555556	293.044	0.11162	1.11162	FALSE	TRUE	308	236	75.5377
F:\25-03-2022\20220324-SAMPLE BROTH-POS-00.d	3116	scanId=1772565		29.5426	623.346	481.853	2	1244.68	31	2464.67	R.DAAEKAISAIEK.L	DAAEKAISAIEK	WP_012295678.1 MULTISPECIES: iron-containing alcohol dehydrogenase [Lysinibacillus]	320	331	1	1244.66	0.0157628	12.6643	1	22	0.0454545	269.491	0.109342	1.10934	TRUE	FALSE	309	236	75.5377
F:\25-03-2022\20220324-SAMPLE BROTH-POS-00.d	4185	scanId=2401983		40.0329	476.769	1132.44	2	951.523	43	3762.77	K.RHGQVLDK.V	RHGQVLDK	WP_012295261.1 MULTISPECIES: TrkA family potassium uptake protein [Lysinibacillus]	105	112	1	951.525	-0.00248305	-2.60955	1	14	0.0714286	410.579	0.109116	1.10912	TRUE	FALSE	310	236	75.5377
F:\25-03-2022\20220324-SAMPLE BROTH-POS-00.d	2651	scanId=1495431		24.9237	857.966	690.69	2	1713.92	39	2817.48	K.VTVVTIGGEDAEKQLR.T	VTVVTIGGEDAEKQLR	WP_012295569.1 MULTISPECIES: electron transfer flavoprotein subunit beta/FixA family protein [Lysinibacillus]	55	70	1	1713.93	-0.00806789	-4.70726	1	30	0.0333333	306.79	0.108888	1.10889	TRUE	FALSE	311	236	75.5377
F:\25-03-2022\20220324-SAMPLE BROTH-POS-00.d	3237	scanId=1844208		30.7367	716.871	773.775	2	1431.73	33	2493.8	K.FTVVYAKNGMFR.A	FTVVYAKNGMFR	DECOY_WP_012292625.1 MULTISPECIES: beta-propeller domain-containing protein [Lysinibacillus]	203	214	1	1431.73	-0.00677327	-4.73082	1	22	0.0454545	268.625	0.107717	1.10772	FALSE	TRUE	311	237	75.5377
F:\25-03-2022\20220324-SAMPLE BROTH-POS-00.d	2518	scanId=1416085		23.6013	625.335	366.001	2	1248.65	30	1752.42	K.ASEKVLQAM(oxidation of M)TR.T	ASEKVLQAMTR	WP_012291839.1 MULTISPECIES: asparagine synthase (glutamine-hydrolyzing) [Lysinibacillus]	16	26	1	1248.65	0.00532388	4.26371	1	20	0.05	187.569	0.107034	1.10703	TRUE	FALSE	312	237	75.5377
F:\25-03-2022\20220324-SAMPLE BROTH-POS-00.d	1036	scanId=552373		9.20608	591.315	330.205	2	1180.62	17	1149.45	R.LTVYDLDSKK.A	LTVYDLDSKK	DECOY_WP_012293776.1 MULTISPECIES: carboxypeptidase M32 [Lysinibacillus]	422	431	1	1180.63	-0.0184857	-15.6574	1	18	0.0555556	122.121	0.106243	1.10624	FALSE	TRUE	312	238	75.5377
F:\25-03-2022\20220324-SAMPLE BROTH-POS-00.d	2645	scanId=1491663		24.8609	633.846	495.887	2	1265.68	35	2373.65	K.FIKENSSDKAK.H	FIKENSSDKAK	WP_012293387.1 MULTISPECIES: GNAT family N-acetyltransferase [Lysinibacillus]	52	62	2	1265.66	0.0152079	12.0158	1	20	0.05	250.578	0.105567	1.10557	TRUE	FALSE	313	238	75.5377
F:\25-03-2022\20220324-SAMPLE BROTH-POS-00.d	1376	scanId=745754		12.4291	541.768	508.66	2	1081.52	21	1606.83	K.TFAQTLDMR.M	TFAQTLDMR	DECOY_WP_053595274.1 MULTISPECIES: heat-inducible transcriptional repressor HrcA [Lysinibacillus]	7	15	0	1081.52	-0.00155193	-1.43495	1	16	0.0625	168.722	0.105003	1.105	FALSE	TRUE	313	239	75.5377
F:\25-03-2022\20220324-SAMPLE BROTH-POS-00.d	3696	scanId=2114227		35.237	639.332	577.327	2	1276.65	34	1807.81	R.ATEEPNRLYGK.M	ATEEPNRLYGK	DECOY_WP_012292068.1 MULTISPECIES: long-chain fatty acid--CoA ligase [Lysinibacillus]	133	143	1	1276.64	0.00882206	6.91037	1	20	0.05	187.413	0.103668	1.10367	FALSE	TRUE	313	240	75.5377
F:\25-03-2022\20220324-SAMPLE BROTH-POS-00.d	1817	scanId=999911		16.6651	611.314	1151.52	2	1220.61	36	2075.43	R.INGQVEAAYTR.I	INGQVEAAYTR	DECOY_WP_012292149.1 MULTISPECIES: RluA family pseudouridine synthase [Lysinibacillus]	119	129	0	1220.61	-0.00196705	-1.61153	1	20	0.05	211.88	0.10209	1.10209	FALSE	TRUE	313	241	75.5377
F:\25-03-2022\20220324-SAMPLE BROTH-POS-00.d	2573	scanId=1448607		24.1433	480.254	561.855	2	958.494	26	1778.75	K.KEAVVEER.K	KEAVVEER	WP_012295295.1 MULTISPECIES: Clp protease ClpP [Lysinibacillus]	260	267	1	958.508	-0.0141775	-14.7912	1	14	0.0714286	180.806	0.101648	1.10165	TRUE	FALSE	314	241	75.5377
F:\25-03-2022\20220324-SAMPLE BROTH-POS-00.d	3545	scanId=2025357		33.7558	596.842	511.983	2	1191.67	31	1763.7	K.KTRGETM(oxidation of M)IIK.M	KTRGETMIIK	DECOY_WP_012293172.1 MULTISPECIES: RNA-binding protein [Lysinibacillus]	17	26	2	1191.66	0.00517037	4.33878	1	18	0.0555556	177.756	0.100786	1.10079	FALSE	TRUE	314	242	75.5377
F:\25-03-2022\20220324-SAMPLE BROTH-POS-00.d	4163	scanId=2389349		39.8224	722.38	906.529	2	1442.75	43	2675.33	K.INAESGVIRNENK.L	INAESGVIRNENK	DECOY_WP_012293689.1 MULTISPECIES: spore germination protein [Lysinibacillus]	312	324	1	1442.75	-0.001999	-1.38555	1	24	0.0416667	268.763	0.10046	1.10046	FALSE	TRUE	314	243	75.5377
F:\25-03-2022\20220324-SAMPLE BROTH-POS-00.d	2918	scanId=1654226		27.5703	744.848	784.375	2	1487.68	41	2717.57	K.KYAC[carbamidomethylation of C]DEWNFKK.-	KYACDEWNFKK	WP_031417388.1 MULTISPECIES: lipoate--protein ligase family protein [Lysinibacillus]	266	276	2	1487.69	-0.00613411	-4.12325	1	20	0.05	269.625	0.0992155	1.09922	TRUE	FALSE	315	243	75.5377
F:\25-03-2022\20220324-SAMPLE BROTH-POS-00.d	1994	scanId=1103546		18.3923	635.788	332.2	2	1269.56	22	1338.44	K.MLSEEEFEEK.G	MLSEEEFEEK	DECOY_WP_012295242.1 MULTISPECIES: RNA polymerase sigma factor RpoD [Lysinibacillus]	297	306	0	1269.54	0.0175867	13.8528	1	18	0.0555556	132.146	0.0987311	1.09873	FALSE	TRUE	315	244	75.5377
F:\25-03-2022\20220324-SAMPLE BROTH-POS-00.d	3147	scanId=1790515		29.8418	776.928	564.778	2	1551.84	22	1517.98	K.AAVPVFKEELFRF.-	AAVPVFKEELFRF	DECOY_WP_012295411.1 MULTISPECIES: PTS sugar transporter subunit IIC [Lysinibacillus]	430	442	2	1551.84	-0.00422547	-2.72287	1	24	0.0416667	147.42	0.0971158	1.09712	FALSE	TRUE	315	245	75.5377
F:\25-03-2022\20220324-SAMPLE BROTH-POS-00.d	2073	scanId=1149380		19.1562	468.238	1178.58	2	934.461	49	3563.78	R.KEM(oxidation of M)RAER.A	KEMRAER	DECOY_WP_012292487.1 MULTISPECIES: response regulator transcription factor [Lysinibacillus]	107	113	2	934.465	-0.00453714	-4.85533	1	12	0.0833333	341.939	0.0959485	1.09595	FALSE	TRUE	315	246	75.5377
F:\25-03-2022\20220324-SAMPLE BROTH-POS-00.d	2297	scanId=1282766		21.3793	586.339	382.576	2	1170.66	21	1706.67	R.AWRLANVVDK.T	AWRLANVVDK	DECOY_WP_012295584.1 MULTISPECIES: FAD-binding oxidoreductase [Lysinibacillus]	399	408	1	1170.65	0.0133806	11.4301	1	18	0.0555556	161.11	0.0943998	1.0944	FALSE	TRUE	315	247	75.5377
F:\25-03-2022\20220324-SAMPLE BROTH-POS-00.d	3189	scanId=1815838		30.2638	531.803	794.734	2	1061.59	63	4387.98	R.VLM(oxidation of M)LSEKAR.G	VLMLSEKAR	WP_012292330.1 MULTISPECIES: Fe-S cluster assembly protein SufD [Lysinibacillus]	350	358	1	1061.59	0.000602745	0.567775	1	16	0.0625	413.481	0.0942304	1.09423	TRUE	FALSE	316	247	75.5377
F:\25-03-2022\20220324-SAMPLE BROTH-POS-00.d	4103	scanId=2355141		39.2522	362.216	1476.47	2	722.417	44	4503.37	M.NLHALR.L	NLHALR	WP_012293450.1 MULTISPECIES: LysR family transcriptional regulator [Lysinibacillus]	2	7	0	722.419	-0.00155459	-2.15193	1	10	0.1	423.525	0.0940463	1.09405	TRUE	FALSE	317	247	75.5377
F:\25-03-2022\20220324-SAMPLE BROTH-POS-00.d	4072	scanId=2337975		38.9661	1171.63	680.118	2	2341.25	45	3264.22	R.FLGREVLM(oxidation of M)PIVDSFFLDLSK.A	FLGREVLMPIVDSFFLDLSK	DECOY_WP_227256875.1 MULTISPECIES: NtaA/DmoA family FMN-dependent monooxygenase [Lysinibacillus]	24	43	1	2341.24	0.00814124	3.47732	1	38	0.0263158	300.002	0.0919063	1.09191	FALSE	TRUE	317	248	75.5377
F:\25-03-2022\20220324-SAMPLE BROTH-POS-00.d	3627	scanId=2073837		34.5638	697.366	558.006	2	1392.72	20	1209.16	R.FTARAEVWSNGR.L	FTARAEVWSNGR	WP_241744839.1 MULTISPECIES: hypothetical protein [Lysinibacillus]	99	110	1	1392.69	0.0266395	19.1281	1	22	0.0454545	110.125	0.0910753	1.09108	TRUE	FALSE	318	248	75.5377
F:\25-03-2022\20220324-SAMPLE BROTH-POS-00.d	4288	scanId=2462025		41.0336	362.222	4691.41	2	722.43	54	7051.71	M.NLHALR.L	NLHALR	WP_012293450.1 MULTISPECIES: LysR family transcriptional regulator [Lysinibacillus]	2	7	0	722.419	0.0111981	15.5008	1	10	0.1	637.576	0.0904144	1.09041	TRUE	FALSE	319	248	75.5377
F:\25-03-2022\20220324-SAMPLE BROTH-POS-00.d	3921	scanId=2249700		37.4949	766.913	846.554	2	1531.81	41	2911.37	K.VGGINDKDLPTYIK.E	VGGINDKDLPTYIK	WP_012295111.1 MULTISPECIES: hypothetical protein [Lysinibacillus]	304	317	1	1531.82	-0.0126509	-8.25872	1	26	0.0384615	259.191	0.0890271	1.08903	TRUE	FALSE	320	248	75.5377
F:\25-03-2022\20220324-SAMPLE BROTH-POS-00.d	1763	scanId=968596		16.1431	672.341	547.028	2	1342.67	25	1322.52	K.MDAIINEAEPLK.G	MDAIINEAEPLK	DECOY_WP_031418474.1 MULTISPECIES: ABC transporter substrate-binding protein [Lysinibacillus]	138	149	0	1342.68	-0.013277	-9.88845	1	22	0.0454545	115.953	0.0876758	1.08768	FALSE	TRUE	320	249	75.5377
F:\25-03-2022\20220324-SAMPLE BROTH-POS-00.d	1706	scanId=934846		15.5806	617.806	351.618	2	1233.6	26	1642.59	K.STEVSLDNLEK.I	STEVSLDNLEK	DECOY_WP_012293800.1 MULTISPECIES: methyl-accepting chemotaxis protein [Lysinibacillus]	229	239	0	1233.61	-0.011601	-9.4041	1	20	0.05	143.438	0.0873244	1.08732	FALSE	TRUE	320	250	75.5377
F:\25-03-2022\20220324-SAMPLE BROTH-POS-00.d	3839	scanId=2200608		36.6767	703.898	613.194	2	1405.78	25	1189.46	K.NPNIQALVIAPTR.E	NPNIQALVIAPTR	WP_012295794.1 MULTISPECIES: DEAD/DEAH box helicase [Lysinibacillus]	68	80	0	1405.8	-0.023604	-16.7904	1	24	0.0416667	103.621	0.0871162	1.08712	TRUE	FALSE	321	250	75.5377
F:\25-03-2022\20220324-SAMPLE BROTH-POS-00.d	2523	scanId=1419353		23.6558	472.77	669.578	2	943.525	32	2051.77	K.KQRLEDR.W	KQRLEDR	WP_036160485.1 MULTISPECIES: AAA family ATPase [Lysinibacillus]	530	536	2	943.52	0.00465266	4.93118	1	12	0.0833333	177.753	0.086634	1.08663	TRUE	FALSE	322	250	75.5377
F:\25-03-2022\20220324-SAMPLE BROTH-POS-00.d	3992	scanId=2291270		38.1877	836.916	343.35	2	1671.82	25	1388.09	K.GISAEMDYLDRKM(oxidation of M)K.A	GISAEMDYLDRKMK	WP_068983729.1 MULTISPECIES: histidine--tRNA ligase [Lysinibacillus]	356	369	2	1671.8	0.0205248	12.2771	1	26	0.0384615	120.156	0.0865619	1.08656	TRUE	FALSE	323	250	75.5377
F:\25-03-2022\20220324-SAMPLE BROTH-POS-00.d	3666	scanId=2096605		34.9433	494.787	945.539	2	987.559	33	2391.04	K.TPGFIQLGR.A	TPGFIQLGR	DECOY_WP_012292019.1 MULTISPECIES: phosphoribosylamine--glycine ligase [Lysinibacillus]	328	336	0	987.55	0.0090654	9.17969	1	16	0.0625	206.494	0.0863617	1.08636	FALSE	TRUE	323	251	75.5377
F:\25-03-2022\20220324-SAMPLE BROTH-POS-00.d	2765	scanId=1564026		26.067	562.294	532.012	2	1122.57	37	2719.32	K.GTNDFILTDK.N	GTNDFILTDK	DECOY_WP_024363636.1 MULTISPECIES: stalk domain-containing protein [Lysinibacillus]	221	230	0	1122.56	0.0168315	14.9939	1	18	0.0555556	234.667	0.0862959	1.0863	FALSE	TRUE	323	252	75.5377
F:\25-03-2022\20220324-SAMPLE BROTH-POS-00.d	1929	scanId=1065749		17.7624	479.764	577.321	2	957.513	33	2201.09	K.VAAEAIAGEK.S	VAAEAIAGEK	WP_012293096.1 MULTISPECIES: dihydrolipoyl dehydrogenase [Lysinibacillus]	331	340	0	957.513	-0.000513487	-0.536271	1	18	0.0555556	187.144	0.0850233	1.08502	TRUE	FALSE	324	252	75.5377
F:\25-03-2022\20220324-SAMPLE BROTH-POS-00.d	3290	scanId=1876348		31.2723	776.88	466.57	2	1551.75	21	1023.92	R.MPFDTKPM(oxidation of M)LLTDK.Y	MPFDTKPMLLTDK	DECOY_WP_174804715.1 MULTISPECIES: isoleucine--tRNA ligase [Lysinibacillus]	907	919	0	1551.77	-0.0224557	-14.471	1	24	0.0416667	86.6579	0.0846335	1.08463	FALSE	TRUE	324	253	75.5377
F:\25-03-2022\20220324-SAMPLE BROTH-POS-00.d	1877	scanId=1035264		17.2543	827.866	328.279	2	1653.72	23	1561.23	R.EGQQQEEITYTVET.-	EGQQQEEITYTVET	DECOY_WP_012293181.1 MULTISPECIES: RluA family pseudouridine synthase [Lysinibacillus]	290	303	0	1653.74	-0.0185868	-11.2392	1	26	0.0384615	131.918	0.0844963	1.0845	FALSE	TRUE	324	254	75.5377
F:\25-03-2022\20220324-SAMPLE BROTH-POS-00.d	2643	scanId=1490279		24.8378	652.832	592.252	2	1303.65	32	1659.66	K.SLGSNTPINM(oxidation of M)VR.A	SLGSNTPINMVR	WP_008181711.1 MULTISPECIES: 30S ribosomal protein S5 [Lysinibacillus]	128	139	0	1303.66	-0.00585527	-4.49142	1	22	0.0454545	140.037	0.0843767	1.08438	TRUE	FALSE	325	254	75.5377
F:\25-03-2022\20220324-SAMPLE BROTH-POS-00.d	3820	scanId=2188974		36.4828	1266.65	770.114	2	2531.29	64	4002.69	R.LM(oxidation of M)YVGVTRAEERLYLTC[carbamidomethylation of C]AQSR.T	LMYVGVTRAEERLYLTCAQSR	WP_012292024.1 MULTISPECIES: DNA helicase PcrA [Lysinibacillus]	604	624	2	2531.26	0.022953	9.06781	1	40	0.025	337.202	0.0842439	1.08424	TRUE	FALSE	326	254	75.5377
F:\25-03-2022\20220324-SAMPLE BROTH-POS-00.d	2545	scanId=1432373		23.8727	585.322	474.414	2	1168.63	31	2499.99	K.GTAM(oxidation of M)ELKYLK.D	GTAMELKYLK	DECOY_WP_036160584.1 MULTISPECIES: DUF5050 domain-containing protein [Lysinibacillus]	76	85	1	1168.62	0.0125308	10.7228	1	18	0.0555556	209.521	0.0838087	1.08381	FALSE	TRUE	326	255	75.5377
F:\25-03-2022\20220324-SAMPLE BROTH-POS-00.d	1180	scanId=634978		10.5828	574.28	343.6	2	1146.54	20	1328.39	K.AGGPWIDFER.I	AGGPWIDFER	WP_171821124.1 MULTISPECIES: DNA polymerase III subunit alpha [Lysinibacillus]	539	548	0	1146.55	-0.00111457	-0.972114	1	18	0.0555556	111.005	0.0835638	1.08356	TRUE	FALSE	327	255	75.5377
F:\25-03-2022\20220324-SAMPLE BROTH-POS-00.d	2631	scanId=1483296		24.7215	858.466	821.012	2	1714.92	33	2258.54	K.ELRMTNLPSLSGEIR.I	ELRMTNLPSLSGEIR	DECOY_WP_012292051.1 MULTISPECIES: PrkA family serine protein kinase [Lysinibacillus]	458	472	1	1714.9	0.013972	8.14742	1	28	0.0357143	188.322	0.083382	1.08338	FALSE	TRUE	327	256	75.5377
F:\25-03-2022\20220324-SAMPLE BROTH-POS-00.d	3818	scanId=2187589		36.4597	728.363	1198.31	2	1454.71	39	2279.93	K.LYDATFTHGFRK.G	LYDATFTHGFRK	WP_090002593.1 MULTISPECIES: precorrin-4 C(11)-methyltransferase [Lysinibacillus]	244	255	1	1454.73	-0.0182842	-12.5688	1	22	0.0454545	189.56	0.0831429	1.08314	TRUE	FALSE	328	256	75.5377
F:\25-03-2022\20220324-SAMPLE BROTH-POS-00.d	2622	scanId=1478030		24.6337	576.298	622.42	2	1150.58	38	2942	K.HFEFLMSIK.D	HFEFLMSIK	WP_051563217.1 MULTISPECIES: TetR/AcrR family transcriptional regulator [Lysinibacillus]	89	97	0	1150.58	-0.00378155	-3.28664	1	16	0.0625	242.333	0.0823704	1.08237	TRUE	FALSE	329	256	75.5377
F:\25-03-2022\20220324-SAMPLE BROTH-POS-00.d	1369	scanId=741486		12.358	400.729	712.761	2	799.443	34	2535.36	R.DEKRPR.F	DEKRPR	WP_012293299.1 MULTISPECIES: proline--tRNA ligase [Lysinibacillus]	141	146	1	799.43	0.012468	15.5962	1	10	0.1	206.215	0.0813359	1.08134	TRUE	FALSE	330	256	75.5377
F:\25-03-2022\20220324-SAMPLE BROTH-POS-00.d	2887	scanId=1635940		27.2655	733.364	579.602	2	1464.71	31	1813.4	K.LVSKGRNAC[carbamidomethylation of C]WM(oxidation of M)K.V	LVSKGRNACWMK	WP_012292862.1 MULTISPECIES: Fic family protein [Lysinibacillus]	334	345	2	1464.73	-0.0193292	-13.1964	1	22	0.0454545	147.289	0.081223	1.08122	TRUE	FALSE	331	256	75.5377
F:\25-03-2022\20220324-SAMPLE BROTH-POS-00.d	4172	scanId=2394833		39.9138	676.341	520.121	2	1350.67	25	1648.57	K.KVEEKTNSTMGK.F	KVEEKTNSTMGK	WP_036122138.1 MULTISPECIES: YbaB/EbfC family nucleoid-associated protein [Lysinibacillus]	84	95	2	1350.68	-0.0136179	-10.0822	1	22	0.0454545	132.89	0.0806096	1.08061	TRUE	FALSE	332	256	75.5377
F:\25-03-2022\20220324-SAMPLE BROTH-POS-00.d	2287	scanId=1276999		21.2832	517.259	586.556	2	1032.5	42	3238.92	K.NAVTPEQM(oxidation of M)K.S	NAVTPEQMK	WP_206700942.1 MULTISPECIES: septum site-determining protein MinD [Lysinibacillus]	104	112	0	1032.49	0.0132832	12.8652	1	16	0.0625	260.344	0.08038	1.08038	TRUE	FALSE	333	256	75.5377
F:\25-03-2022\20220324-SAMPLE BROTH-POS-00.d	4026	scanId=2311272		38.5211	672.849	364.444	2	1343.68	42	2989.3	K.EGLNALAEEAAEK.A	EGLNALAEEAAEK	DECOY_WP_012293722.1 MULTISPECIES: TldD/PmbA family protein [Lysinibacillus]	229	241	0	1343.66	0.0257946	19.1973	1	24	0.0416667	239.521	0.080126	1.08013	FALSE	TRUE	333	257	75.5377
F:\25-03-2022\20220324-SAMPLE BROTH-POS-00.d	2250	scanId=1254278		20.9045	551.797	528.978	2	1101.58	31	1900.17	R.VDITLGPEMK.S	VDITLGPEMK	WP_115673784.1 MULTISPECIES: carbamoyl-phosphate synthase large subunit [Lysinibacillus]	896	905	0	1101.57	0.00529367	4.80555	1	18	0.0555556	152.006	0.079996	1.08	TRUE	FALSE	334	257	75.5377
F:\25-03-2022\20220324-SAMPLE BROTH-POS-00.d	1915	scanId=1057213		17.6201	546.803	598.786	2	1091.59	35	2843.1	-.MKSISGDKVK.N	MKSISGDKVK	DECOY_WP_012293541.1 MULTISPECIES: S-layer homology domain-containing protein [Lysinibacillus]	1	10	2	1091.6	-0.00852104	-7.806	1	18	0.0555556	226.967	0.0798306	1.07983	FALSE	TRUE	334	258	75.5377
F:\25-03-2022\20220324-SAMPLE BROTH-POS-00.d	2673	scanId=1508449		25.1407	756.858	495.673	2	1511.7	32	2058.03	K.WIDHIDAMDQLR.Q	WIDHIDAMDQLR	WP_036225924.1 MULTISPECIES: preprotein translocase subunit SecA [Lysinibacillus]	722	733	0	1511.72	-0.0183908	-12.1655	1	22	0.0454545	163.909	0.0796436	1.07964	TRUE	FALSE	335	258	75.5377
F:\25-03-2022\20220324-SAMPLE BROTH-POS-00.d	4244	scanId=2437827		40.6303	718.385	1032.72	2	1434.75	38	2257.01	R.FTQAGSEVSALLGR.M	FTQAGSEVSALLGR	WP_012292768.1 MULTISPECIES: F0F1 ATP synthase subunit beta [Lysinibacillus]	255	268	0	1434.75	0.00813925	5.67295	1	26	0.0384615	178.342	0.0790172	1.07902	TRUE	FALSE	336	258	75.5377
F:\25-03-2022\20220324-SAMPLE BROTH-POS-00.d	2380	scanId=1331085		22.1846	486.794	1103.24	2	971.574	36	2407.27	K.MIARRAVR.F	MIARRAVR	WP_036160363.1 MULTISPECIES: FAD-binding oxidoreductase [Lysinibacillus]	300	307	2	971.581	-0.00742749	-7.64474	1	14	0.0714286	189.926	0.0788969	1.0789	TRUE	FALSE	337	258	75.5377
F:\25-03-2022\20220324-SAMPLE BROTH-POS-00.d	1684	scanId=922432		15.3737	712.327	586.359	2	1422.64	30	1631.9	R.NPIGSENM(oxidation of M)VGM(oxidation of M)SR.L	NPIGSENMVGMSR	WP_012292010.1 MULTISPECIES: adenylosuccinate lyase [Lysinibacillus]	270	282	0	1422.62	0.0162097	11.3942	1	24	0.0416667	127.248	0.0779752	1.07798	TRUE	FALSE	338	258	75.5377
F:\25-03-2022\20220324-SAMPLE BROTH-POS-00.d	2104	scanId=1168050		19.4674	279.191	965.657	2	556.368	35	3059.32	K.VVIAR.S	VVIAR	WP_068986884.1 MULTISPECIES: isochorismate synthase [Lysinibacillus]	216	220	0	556.37	-0.00180003	-3.23531	1	8	0.125	238	0.077795	1.07779	TRUE	FALSE	339	258	75.5377
F:\25-03-2022\20220324-SAMPLE BROTH-POS-00.d	3878	scanId=2222721		37.0452	937.966	499.456	2	1873.92	30	2122.88	R.IQDFFQYPTIEKM(oxidation of M)AK.K	IQDFFQYPTIEKMAK	WP_036162792.1 MULTISPECIES: non-ribosomal peptide synthetase [Lysinibacillus]	2088	2102	1	1873.93	-0.0115922	-6.18603	1	28	0.0357143	164.603	0.0775376	1.07754	TRUE	FALSE	340	258	75.5377
F:\25-03-2022\20220324-SAMPLE BROTH-POS-00.d	2702	scanId=1526289		25.438	505.732	430.498	2	1009.45	34	1796.54	-.M(oxidation of M)C[carbamidomethylation of C]VVSRDK.H	MCVVSRDK	DECOY_WP_036162852.1 MULTISPECIES: transcriptional regulator [Lysinibacillus]	1	8	1	1009.47	-0.0190812	-18.9023	1	14	0.0714286	138.615	0.0771567	1.07716	FALSE	TRUE	340	259	75.6781
F:\25-03-2022\20220324-SAMPLE BROTH-POS-00.d	3863	scanId=2213688		36.8947	740.38	512.672	2	1478.75	34	2261.75	R.EPLTSVIDSSLYR.S	EPLTSVIDSSLYR	DECOY_WP_036162559.1 MULTISPECIES: DNA topoisomerase III [Lysinibacillus]	404	416	0	1478.76	-0.0163117	-11.0306	1	24	0.0416667	173.17	0.0765643	1.07656	FALSE	TRUE	340	260	75.6781
F:\25-03-2022\20220324-SAMPLE BROTH-POS-00.d	3623	scanId=2071448		34.524	849.947	832.943	2	1697.88	32	2128.73	K.GLEVGQTIVSGPDADIK.V	GLEVGQTIVSGPDADIK	WP_008181913.1 MULTISPECIES: 50S ribosomal protein L2 [Lysinibacillus]	109	125	0	1697.88	-0.00373354	-2.19894	1	32	0.03125	161.234	0.0757418	1.07574	TRUE	FALSE	341	260	75.6781
F:\25-03-2022\20220324-SAMPLE BROTH-POS-00.d	1965	scanId=1086747		18.1123	466.755	571.352	2	931.496	31	2263.17	K.ATLDEKQK.E	ATLDEKQK	WP_031416573.1 MULTISPECIES: C40 family peptidase [Lysinibacillus]	153	160	1	931.497	-0.00106354	-1.14175	1	14	0.0714286	171.368	0.0757204	1.07572	TRUE	FALSE	342	260	75.6781
F:\25-03-2022\20220324-SAMPLE BROTH-POS-00.d	26	scanId=16135		0.268783	561.274	341.166	2	1120.53	26	1456.89	K.KHM(oxidation of M)SQM(oxidation of M)LSK.L	KHMSQMLSK	DECOY_WP_012293280.1 MULTISPECIES: flagellar biosynthesis protein FlhF [Lysinibacillus]	271	279	1	1120.54	-0.00274649	-2.45105	1	16	0.0625	110.056	0.0755416	1.07554	FALSE	TRUE	342	261	75.9692
F:\25-03-2022\20220324-SAMPLE BROTH-POS-00.d	2508	scanId=1410653		23.5108	606.329	355.31	2	1210.64	23	1352.9	R.MYTILGVTGEK.K	MYTILGVTGEK	DECOY_WP_068983165.1 MULTISPECIES: type I DNA topoisomerase [Lysinibacillus]	394	404	0	1210.63	0.0157903	13.0431	1	20	0.05	102.078	0.075451	1.07545	FALSE	TRUE	342	262	76.2602
F:\25-03-2022\20220324-SAMPLE BROTH-POS-00.d	3204	scanId=1823433		30.3904	601.319	580.4	2	1200.62	45	3018.08	K.HRIEDFKEK.N	HRIEDFKEK	DECOY_WP_012292276.1 MULTISPECIES: DNA cytosine methyltransferase [Lysinibacillus]	324	332	2	1200.63	-0.00196789	-1.63906	1	16	0.0625	226.141	0.0749287	1.07493	FALSE	TRUE	342	263	76.5513
F:\25-03-2022\20220324-SAMPLE BROTH-POS-00.d	3644	scanId=2083255		34.7208	586.84	596.766	2	1171.67	33	1946.55	K.ANLNNVVTSLK.L	ANLNNVVTSLK	DECOY_WP_012292790.1 MULTISPECIES: S-layer homology domain-containing protein [Lysinibacillus]	342	352	0	1171.66	0.0102588	8.75577	1	20	0.05	145.038	0.0745104	1.07451	FALSE	TRUE	342	264	76.685
F:\25-03-2022\20220324-SAMPLE BROTH-POS-00.d	2600	scanId=1464292		24.4047	673.849	461.735	2	1345.68	39	2546.39	R.EVVTEKKQEEQ.-	EVVTEKKQEEQ	DECOY_WP_058843693.1 MULTISPECIES: isoleucine--tRNA ligase [Lysinibacillus]	1020	1030	2	1345.67	0.0112241	8.34092	1	20	0.05	189.003	0.074224	1.07422	FALSE	TRUE	342	265	76.685
F:\25-03-2022\20220324-SAMPLE BROTH-POS-00.d	1169	scanId=628329		10.472	578.266	311.305	2	1154.52	28	1494.7	R.MTVFTGDGTAR.T	MTVFTGDGTAR	WP_036161794.1 MULTISPECIES: oxalate decarboxylase family bicupin [Lysinibacillus]	296	306	0	1154.54	-0.0210411	-18.2247	1	20	0.05	110.681	0.0740486	1.07405	TRUE	FALSE	343	265	76.685
F:\25-03-2022\20220324-SAMPLE BROTH-POS-00.d	2845	scanId=1612727		26.8787	793.885	497.35	2	1585.76	31	1628.53	K.SDAELREMTFIFK.N	SDAELREMTFIFK	WP_031418679.1 MULTISPECIES: accessory Sec system translocase SecA2 [Lysinibacillus]	38	50	1	1585.78	-0.0258813	-16.3208	1	24	0.0416667	120.321	0.0738834	1.07388	TRUE	FALSE	344	265	76.685
F:\25-03-2022\20220324-SAMPLE BROTH-POS-00.d	2689	scanId=1518253		25.3041	682.341	1382.9	2	1362.67	38	2306.62	-.M(oxidation of M)SADQEQRRVK.G	MSADQEQRRVK	DECOY_WP_227256919.1 MULTISPECIES: alpha-amylase family glycosyl hydrolase [Lysinibacillus]	1	11	2	1362.67	0.000188133	0.138062	1	20	0.05	170.322	0.0738408	1.07384	FALSE	TRUE	344	266	76.9744
F:\25-03-2022\20220324-SAMPLE BROTH-POS-00.d	1891	scanId=1043414		17.3901	586.285	492.004	2	1170.56	32	2482.23	R.ESAGPFHGEIK.K	ESAGPFHGEIK	DECOY_WP_012292021.1 MULTISPECIES: amidohydrolase family protein [Lysinibacillus]	362	372	0	1170.57	-0.0109553	-9.35894	1	20	0.05	182.901	0.0736842	1.07368	FALSE	TRUE	344	267	77.2637
F:\25-03-2022\20220324-SAMPLE BROTH-POS-00.d	2318	scanId=1295788		21.5963	430.25	536.124	2	858.486	36	2498.89	R.TIEVELR.L	TIEVELR	DECOY_WP_036161614.1 MULTISPECIES: 3-hydroxyacyl-ACP dehydratase FabZ [Lysinibacillus]	33	39	0	858.481	0.00513041	5.97615	1	12	0.0833333	183.452	0.0734135	1.07341	FALSE	TRUE	344	268	77.4541
F:\25-03-2022\20220324-SAMPLE BROTH-POS-00.d	3187	scanId=1815173		30.2527	696.823	559.645	2	1391.63	46	2583.42	K.HM(oxidation of M)IIC[carbamidomethylation of C]AEEFVK.N	HMIICAEEFVK	DECOY_WP_036161702.1 MULTISPECIES: MBL fold metallo-hydrolase [Lysinibacillus]	243	253	0	1391.66	-0.026799	-19.2569	1	20	0.05	189.407	0.0733164	1.07332	FALSE	TRUE	344	269	77.4541
F:\25-03-2022\20220324-SAMPLE BROTH-POS-00.d	2164	scanId=1202850		20.0474	481.77	358.247	2	961.525	34	2879.89	K.TLFGLQQR.M	TLFGLQQR	WP_012293865.1 MULTISPECIES: ABC-F family ATP-binding cassette domain-containing protein [Lysinibacillus]	120	127	0	961.535	-0.00919257	-9.56031	1	14	0.0714286	209.741	0.0728296	1.07283	TRUE	FALSE	345	269	77.4541
F:\25-03-2022\20220324-SAMPLE BROTH-POS-00.d	3615	scanId=2066296		34.4381	586.837	574.232	2	1171.66	43	2608.45	M.RVEQGKLSQK.L	RVEQGKLSQK	DECOY_WP_012292718.1 MULTISPECIES: long-chain-fatty-acid--CoA ligase [Lysinibacillus]	2	11	2	1171.67	-0.00863688	-7.37144	1	18	0.0555556	189.327	0.0725822	1.07258	FALSE	TRUE	345	270	77.4541
F:\25-03-2022\20220324-SAMPLE BROTH-POS-00.d	2077	scanId=1151429		19.1903	487.753	706.855	2	973.491	36	2665.35	-.MENLQLAR.K	MENLQLAR	DECOY_WP_012296091.1 MULTISPECIES: 2-C-methyl-D-erythritol 4-phosphate cytidylyltransferase [Lysinibacillus]	1	8	0	973.502	-0.0109627	-11.2611	1	14	0.0714286	193.396	0.0725594	1.07256	FALSE	TRUE	345	271	77.4541
F:\25-03-2022\20220324-SAMPLE BROTH-POS-00.d	2026	scanId=1122667		18.711	498.269	462	2	994.524	35	2786.06	K.VIPNPEGNR.T	VIPNPEGNR	WP_012295327.1 MULTISPECIES: molecular chaperone DnaK [Lysinibacillus]	26	34	0	994.52	0.0044447	4.46919	1	16	0.0625	201.66	0.0723817	1.07238	TRUE	FALSE	346	271	77.4541
F:\25-03-2022\20220324-SAMPLE BROTH-POS-00.d	3504	scanId=2002462		33.3742	526.764	683.778	2	1051.51	24	1816.16	-.MLAGTKM(oxidation of M)ER.E	MLAGTKMER	DECOY_WP_036162138.1 MULTISPECIES: diguanylate cyclase [Lysinibacillus]	1	9	1	1051.52	-0.00158318	-1.50561	1	16	0.0625	131.122	0.0721972	1.0722	FALSE	TRUE	346	272	77.4541
F:\25-03-2022\20220324-SAMPLE BROTH-POS-00.d	3469	scanId=1982011		33.0334	591.876	522.919	2	1181.74	50	3710.69	K.LAIPSKKAINK.A	LAIPSKKAINK	DECOY_WP_036162289.1 MULTISPECIES: enoyl-CoA hydratase [Lysinibacillus]	55	65	2	1181.75	-0.0126543	-10.7081	1	20	0.05	265.193	0.0714673	1.07147	FALSE	TRUE	346	273	77.4541
F:\25-03-2022\20220324-SAMPLE BROTH-POS-00.d	2996	scanId=1700600		28.3432	717.366	517.764	2	1432.72	29	2083	K.LM(oxidation of M)EKAELALEDR.V	LMEKAELALEDR	WP_068985713.1 MULTISPECIES: protein arginine kinase [Lysinibacillus]	258	269	1	1432.72	-0.00559671	-3.90635	1	22	0.0454545	148.416	0.0712511	1.07125	TRUE	FALSE	347	273	77.4541
F:\25-03-2022\20220324-SAMPLE BROTH-POS-00.d	2361	scanId=1320170		22.0027	589.793	570.311	2	1177.57	25	1690.26	K.GAEKDQLDFR.A	GAEKDQLDFR	DECOY_WP_012293806.1 MULTISPECIES: sulfurtransferase [Lysinibacillus]	240	249	1	1177.57	-0.00113176	-0.9611	1	18	0.0555556	120.227	0.0711294	1.07113	FALSE	TRUE	347	274	77.4541
F:\25-03-2022\20220324-SAMPLE BROTH-POS-00.d	2195	scanId=1221136		20.3521	522.291	2875.85	2	1042.57	63	5161.75	K.ALVQELENK.E	ALVQELENK	WP_036161951.1 MULTISPECIES: DUF6138 family protein [Lysinibacillus]	502	510	0	1042.57	0.000909164	0.872045	1	16	0.0625	363.829	0.0704855	1.07049	TRUE	FALSE	348	274	77.4541
F:\25-03-2022\20220324-SAMPLE BROTH-POS-00.d	1783	scanId=980899		16.3482	671.848	489.055	2	1341.68	28	1748.69	K.NTEIENKFYGK.A	NTEIENKFYGK	DECOY_WP_036161990.1 MULTISPECIES: non-ribosomal peptide synthetase [Lysinibacillus]	219	229	1	1341.66	0.0255365	19.0335	1	20	0.05	123	0.0703383	1.07034	FALSE	TRUE	348	275	77.4541
F:\25-03-2022\20220324-SAMPLE BROTH-POS-00.d	3097	scanId=1760762		29.3459	617.319	593.556	2	1232.62	32	2269.05	R.GMYHGIPM(oxidation of M)ALK.D	GMYHGIPMALK	WP_082340366.1 MULTISPECIES: amidase family protein [Lysinibacillus]	71	81	0	1232.6	0.0188904	15.3256	1	20	0.05	159.397	0.0702484	1.07025	TRUE	FALSE	349	275	77.4541
F:\25-03-2022\20220324-SAMPLE BROTH-POS-00.d	2970	scanId=1685697		28.0948	484.746	1050.63	2	967.478	46	3169.33	K.YAALPDYR.V	YAALPDYR	WP_012295163.1 MULTISPECIES: MBL fold metallo-hydrolase [Lysinibacillus]	97	104	0	967.476	0.0012885	1.33182	1	14	0.0714286	222.522	0.070211	1.07021	TRUE	FALSE	350	275	77.4541
F:\25-03-2022\20220324-SAMPLE BROTH-POS-00.d	2635	scanId=1485512		24.7584	494.76	513.219	2	987.506	31	2462.64	R.QTGLELAEK.Y	QTGLELAEK	WP_012292035.1 MULTISPECIES: tRNA-dihydrouridine synthase [Lysinibacillus]	215	223	0	987.524	-0.0179308	-18.1574	1	16	0.0625	172.711	0.0701322	1.07013	TRUE	FALSE	351	275	77.4541
F:\25-03-2022\20220324-SAMPLE BROTH-POS-00.d	3614	scanId=2065963		34.4326	679.352	581.521	2	1356.69	37	2073.15	K.VEKSIGYYSRR.E	VEKSIGYYSRR	DECOY_WP_036161697.1 MULTISPECIES: nitroreductase family protein [Lysinibacillus]	179	189	2	1356.71	-0.0248409	-18.3096	1	20	0.05	145.33	0.0701008	1.0701	FALSE	TRUE	351	276	77.4541
F:\25-03-2022\20220324-SAMPLE BROTH-POS-00.d	3471	scanId=1982676		33.0445	976.97	338.497	2	1951.92	40	2278.25	R.QEM(oxidation of M)LRQRDAYLEAGEK.H	QEMLRQRDAYLEAGEK	WP_068983953.1 MULTISPECIES: dephospho-CoA kinase [Lysinibacillus]	92	107	2	1951.94	-0.0177124	-9.07426	1	30	0.0333333	158.038	0.0693683	1.06937	TRUE	FALSE	352	276	77.4541
F:\25-03-2022\20220324-SAMPLE BROTH-POS-00.d	1346	scanId=728455		12.1408	585.295	347.225	2	1168.58	23	1654.44	K.LEQRGTFYR.E	LEQRGTFYR	DECOY_WP_054550015.1 MULTISPECIES: ribosome biogenesis GTP-binding protein YihA/YsxC [Lysinibacillus]	89	97	1	1168.6	-0.0228022	-19.5124	1	16	0.0625	114.104	0.0689684	1.06897	FALSE	TRUE	352	277	77.4541
F:\25-03-2022\20220324-SAMPLE BROTH-POS-00.d	4004	scanId=2298471		38.3077	607.335	652.827	2	1212.65	46	2438.36	K.ALRIDQDRAR.Q	ALRIDQDRAR	DECOY_WP_012292700.1 MULTISPECIES: cell wall hydrolase [Lysinibacillus]	56	65	2	1212.67	-0.0138316	-11.4059	1	18	0.0555556	167.76	0.0688003	1.0688	FALSE	TRUE	352	278	77.4541
F:\25-03-2022\20220324-SAMPLE BROTH-POS-00.d	3358	scanId=1916740		31.9455	672.858	363.013	2	1343.7	48	3156.47	R.GLVNVIDAIC[carbamidomethylation of C]DR.I	GLVNVIDAICDR	DECOY_WP_012292116.1 MULTISPECIES: HpcH/HpaI aldolase/citrate lyase family protein [Lysinibacillus]	163	174	0	1343.69	0.014132	10.5173	1	22	0.0454545	216.077	0.0684552	1.06846	FALSE	TRUE	352	279	77.4541
F:\25-03-2022\20220324-SAMPLE BROTH-POS-00.d	2586	scanId=1455872		24.2644	621.832	445.959	2	1241.65	31	2004.99	M.TIQQFTDYVK.K	TIQQFTDYVK	WP_012293776.1 MULTISPECIES: carboxypeptidase M32 [Lysinibacillus]	2	11	0	1241.63	0.0212344	17.102	1	18	0.0555556	137.004	0.0683316	1.06833	TRUE	FALSE	353	279	77.4541
F:\25-03-2022\20220324-SAMPLE BROTH-POS-00.d	3931	scanId=2255300		37.5882	718.354	372.164	2	1434.69	29	1919.84	R.VEENSEKTEDKK.E	VEENSEKTEDKK	DECOY_WP_012295694.1 MULTISPECIES: YtxH domain-containing protein [Lysinibacillus]	4	15	2	1434.68	0.0102443	7.14045	1	22	0.0454545	130.473	0.0679601	1.06796	FALSE	TRUE	353	280	77.4541
F:\25-03-2022\20220324-SAMPLE BROTH-POS-00.d	2308	scanId=1289637		21.4938	544.781	454.955	2	1087.55	31	2403.67	R.TKAEDLAGQR.I	TKAEDLAGQR	WP_031416173.1 MULTISPECIES: MogA/MoaB family molybdenum cofactor biosynthesis protein [Lysinibacillus]	22	31	1	1087.56	-0.0144304	-13.2685	1	18	0.0555556	160.653	0.0668365	1.06684	TRUE	FALSE	354	280	77.4541
F:\25-03-2022\20220324-SAMPLE BROTH-POS-00.d	3105	scanId=1765529		29.4254	582.799	715.629	2	1163.58	52	3869.81	K.LDFELGTGNAK.A	LDFELGTGNAK	DECOY_WP_012296030.1 MULTISPECIES: glutamine--fructose-6-phosphate transaminase (isomerizing) [Lysinibacillus]	174	184	0	1163.58	0.000668504	0.574523	1	20	0.05	257.242	0.0664742	1.06647	FALSE	TRUE	354	281	77.4541
F:\25-03-2022\20220324-SAMPLE BROTH-POS-00.d	3136	scanId=1784199		29.7365	599.298	565.067	2	1196.58	38	2949.58	R.KIDSEM(oxidation of M)FRR.F	KIDSEMFRR	WP_229389813.1 MULTISPECIES: glutamate-1-semialdehyde 2,1-aminomutase [Lysinibacillus]	373	381	2	1196.6	-0.0162305	-13.5639	1	16	0.0625	195.705	0.0663501	1.06635	TRUE	FALSE	355	281	77.4541
F:\25-03-2022\20220324-SAMPLE BROTH-POS-00.d	3485	scanId=1991043		33.1839	613.834	733.091	2	1225.65	48	3469.83	K.QEAKYYIRR.K	QEAKYYIRR	WP_012295282.1 MULTISPECIES: bacteriophage regulatory protein [Lysinibacillus]	196	204	2	1225.66	-0.0027381	-2.23398	1	16	0.0625	230.165	0.0663333	1.06633	TRUE	FALSE	356	281	77.4541
F:\25-03-2022\20220324-SAMPLE BROTH-POS-00.d	1518	scanId=826523		13.7752	571.765	513.592	2	1141.51	28	2238.67	K.GQKMEHQER.V	GQKMEHQER	DECOY_WP_012293324.1 MULTISPECIES: insulinase family protein [Lysinibacillus]	172	180	1	1141.53	-0.0150129	-13.1516	1	16	0.0625	148.004	0.0661124	1.06611	FALSE	TRUE	356	282	77.4541
F:\25-03-2022\20220324-SAMPLE BROTH-POS-00.d	2224	scanId=1239092		20.6514	521.281	661.954	2	1040.55	60	5021.69	K.TLKNYGFAK.V	TLKNYGFAK	WP_036162511.1 MULTISPECIES: 23S rRNA (uracil(1939)-C(5))-methyltransferase RlmD [Lysinibacillus]	51	59	1	1040.57	-0.0176901	-17.0005	1	16	0.0625	331.823	0.0660779	1.06608	TRUE	FALSE	357	282	77.4541
F:\25-03-2022\20220324-SAMPLE BROTH-POS-00.d	3647	scanId=2085137		34.7522	735.912	972.063	2	1469.81	50	2964.02	K.TAARLAFFVLSM(oxidation of M)K.E	TAARLAFFVLSMK	WP_031419468.1 MULTISPECIES: recombination mediator RecR [Lysinibacillus]	24	36	1	1469.81	0.0037669	2.56286	1	24	0.0416667	195.142	0.0658371	1.06584	TRUE	FALSE	358	282	77.4541
F:\25-03-2022\20220324-SAMPLE BROTH-POS-00.d	4134	scanId=2373722		39.5619	476.773	1080.09	2	951.531	45	4356.53	K.RHGQVLDK.V	RHGQVLDK	WP_012295261.1 MULTISPECIES: TrkA family potassium uptake protein [Lysinibacillus]	105	112	1	951.525	0.00579024	6.08522	1	14	0.0714286	286.334	0.0657252	1.06573	TRUE	FALSE	359	282	77.4541
F:\25-03-2022\20220324-SAMPLE BROTH-POS-00.d	2837	scanId=1607573		26.7928	569.294	360.043	2	1136.57	24	1615.05	R.DELLEIFMK.Q	DELLEIFMK	WP_031419589.1 MULTISPECIES: lactate utilization protein C [Lysinibacillus]	47	55	0	1136.58	-0.00439879	-3.8702	1	16	0.0625	106.021	0.0656456	1.06565	TRUE	FALSE	360	282	77.4541
F:\25-03-2022\20220324-SAMPLE BROTH-POS-00.d	3138	scanId=1785583		29.7596	859.444	526.581	2	1716.87	36	1875.77	M.NIHDLQRDFVAYAR.A	NIHDLQRDFVAYAR	WP_012292144.1 MULTISPECIES: tRNA epoxyqueuosine(34) reductase QueG [Lysinibacillus]	2	15	1	1716.87	0.00426722	2.48546	1	26	0.0384615	122.576	0.0653471	1.06535	TRUE	FALSE	361	282	77.4541
F:\25-03-2022\20220324-SAMPLE BROTH-POS-00.d	4354	scanId=2501466		41.691	1196.05	403.371	2	2390.08	38	2030.82	R.GSMLM(oxidation of M)KNFYMEFIEEKSYK.R	GSMLMKNFYMEFIEEKSYK	DECOY_WP_197150523.1 MULTISPECIES: penicillin-binding protein 1A [Lysinibacillus]	691	709	2	2390.1	-0.0229209	-9.58992	1	36	0.0277778	132.613	0.0653005	1.0653	FALSE	TRUE	361	283	77.4541
F:\25-03-2022\20220324-SAMPLE BROTH-POS-00.d	1320	scanId=712937		11.8821	414.712	322.638	2	827.409	28	2165.72	-.M(oxidation of M)HLQQR.L	MHLQQR	DECOY_WP_012293790.1 MULTISPECIES: 5-oxoprolinase subunit PxpA [Lysinibacillus]	1	6	0	827.407	0.00150645	1.82069	1	10	0.1	141.324	0.0652551	1.06526	FALSE	TRUE	361	284	77.4541
F:\25-03-2022\20220324-SAMPLE BROTH-POS-00.d	546	scanId=291385		4.85628	504.758	793.344	2	1007.5	56	4371.15	K.ILYNDENK.E	ILYNDENK	DECOY_WP_036162416.1 MULTISPECIES: DUF4272 domain-containing protein [Lysinibacillus]	354	361	0	1007.49	0.00910677	9.03905	1	14	0.0714286	285.003	0.065201	1.0652	FALSE	TRUE	361	285	77.4541
F:\25-03-2022\20220324-SAMPLE BROTH-POS-00.d	2966	scanId=1682929		28.0487	400.75	673.794	2	799.486	41	3190.33	R.AGDIAILK.E	AGDIAILK	WP_012295698.1 MULTISPECIES: DUF4479 domain-containing tRNA-binding protein [Lysinibacillus]	31	38	0	799.48	0.00595186	7.44466	1	14	0.0714286	207.903	0.0651667	1.06517	TRUE	FALSE	362	285	77.4541
F:\25-03-2022\20220324-SAMPLE BROTH-POS-00.d	1397	scanId=757233		12.6204	414.733	415.702	2	827.451	34	2550.82	R.ITHSATAK.L	ITHSATAK	DECOY_WP_012296214.1 MULTISPECIES: acyl-CoA dehydrogenase [Lysinibacillus]	170	177	0	827.45	0.00132992	1.60725	1	14	0.0714286	166.077	0.0651073	1.06511	FALSE	TRUE	362	286	77.4541
F:\25-03-2022\20220324-SAMPLE BROTH-POS-00.d	1907	scanId=1052613		17.5434	344.698	656.104	2	687.382	35	2452.32	R.VTIAER.D	VTIAER	DECOY_WP_068983286.1 MULTISPECIES: pyruvate carboxylase [Lysinibacillus]	204	209	0	687.392	-0.00998849	-14.531	1	10	0.1	159.349	0.0649788	1.06498	FALSE	TRUE	362	287	77.4541
F:\25-03-2022\20220324-SAMPLE BROTH-POS-00.d	2834	scanId=1605689		26.7614	622.312	874.682	2	1242.61	51	3651.14	R.QIEEALEQQR.R	QIEEALEQQR	WP_012291937.1 MULTISPECIES: twin-arginine translocase subunit TatC [Lysinibacillus]	256	265	0	1242.62	-0.0114848	-9.24243	1	18	0.0555556	235.719	0.0645604	1.06456	TRUE	FALSE	363	287	77.4541
F:\25-03-2022\20220324-SAMPLE BROTH-POS-00.d	4204	scanId=2413119		40.2185	692.385	647.742	2	1382.76	47	2540.24	K.SLNEC[carbamidomethylation of C]VLHRKK.L	SLNECVLHRKK	DECOY_WP_012293796.1 MULTISPECIES: ABC transporter ATP-binding protein [Lysinibacillus]	3	13	2	1382.75	0.0109693	7.93299	1	20	0.05	161.61	0.0636199	1.06362	FALSE	TRUE	363	288	77.4541
F:\25-03-2022\20220324-SAMPLE BROTH-POS-00.d	1630	scanId=890782		14.8462	518.27	590.045	2	1034.53	39	2776.83	K.VFADTVAQGK.Q	VFADTVAQGK	WP_012295418.1 MULTISPECIES: aspartate--tRNA ligase [Lysinibacillus]	311	320	0	1034.54	-0.0146289	-14.1405	1	18	0.0555556	175.256	0.0631138	1.06311	TRUE	FALSE	364	288	77.4541
F:\25-03-2022\20220324-SAMPLE BROTH-POS-00.d	1120	scanId=600500		10.0082	341.702	458.751	2	681.39	30	2357.91	K.KELHR.V	KELHR	DECOY_WP_012293293.1 MULTISPECIES: UMP kinase [Lysinibacillus]	118	122	1	681.392	-0.00246264	-3.61413	1	8	0.125	148.668	0.0630507	1.06305	FALSE	TRUE	364	289	77.4541
F:\25-03-2022\20220324-SAMPLE BROTH-POS-00.d	2870	scanId=1627075		27.1178	582.796	683.231	2	1163.58	30	1412.35	R.VSRM(oxidation of M)NKNGDK.K	VSRMNKNGDK	WP_036161149.1 MULTISPECIES: LysM peptidoglycan-binding domain-containing protein [Lysinibacillus]	30	39	2	1163.57	0.0064908	5.57834	1	18	0.0555556	88.642	0.0627621	1.06276	TRUE	FALSE	365	289	77.4541
F:\25-03-2022\20220324-SAMPLE BROTH-POS-00.d	3313	scanId=1889867		31.4977	652.328	835.778	2	1302.64	47	2680.6	K.TEIFMDVRHR.T	TEIFMDVRHR	WP_012293617.1 MULTISPECIES: heptaprenyl diphosphate synthase component 1 [Lysinibacillus]	15	24	1	1302.65	-0.00889838	-6.83099	1	18	0.0555556	168.011	0.0626765	1.06268	TRUE	FALSE	366	289	77.4541
F:\25-03-2022\20220324-SAMPLE BROTH-POS-00.d	2992	scanId=1698384		28.3063	467.248	950.007	2	932.481	36	2463.54	K.LVPESFNK.T	LVPESFNK	WP_012296163.1 MULTISPECIES: GntP family permease [Lysinibacillus]	200	207	0	932.497	-0.0159793	-17.1361	1	14	0.0714286	153.926	0.0624817	1.06248	TRUE	FALSE	367	289	77.4541
F:\25-03-2022\20220324-SAMPLE BROTH-POS-00.d	1017	scanId=542112		9.03507	323.183	460.266	2	644.352	33	2674.49	R.VIGNDK.A	VIGNDK	WP_012294172.1 MULTISPECIES: collagenase [Lysinibacillus]	430	435	0	644.349	0.00227483	3.53043	1	10	0.1	166.488	0.0622502	1.06225	TRUE	FALSE	368	289	77.4541
F:\25-03-2022\20220324-SAMPLE BROTH-POS-00.d	2678	scanId=1511718		25.1952	682.84	683.173	2	1363.66	31	1671.41	K.ATGLDDGRTRM(oxidation of M)R.D	ATGLDDGRTRMR	DECOY_WP_012292938.1 MULTISPECIES: helicase-exonuclease AddAB subunit AddA [Lysinibacillus]	442	453	2	1363.66	0.00200736	1.47204	1	22	0.0454545	103.29	0.0617982	1.0618	FALSE	TRUE	368	290	77.4541
F:\25-03-2022\20220324-SAMPLE BROTH-POS-00.d	3411	scanId=1946988		32.4497	617.802	385.496	2	1233.59	32	1805.55	K.GNGYYLADFSK.K	GNGYYLADFSK	DECOY_WP_016994084.1 MULTISPECIES: type I DNA topoisomerase [Lysinibacillus]	482	492	0	1233.57	0.0235479	19.0893	1	20	0.05	111.154	0.0615623	1.06156	FALSE	TRUE	368	291	77.4541
F:\25-03-2022\20220324-SAMPLE BROTH-POS-00.d	1719	scanId=942713		15.7118	421.232	583.284	2	840.449	35	4291.46	K.GVLFSYR.N	GVLFSYR	WP_012292718.1 MULTISPECIES: long-chain-fatty-acid--CoA ligase [Lysinibacillus]	170	176	0	840.449	-0.000490141	-0.583189	1	12	0.0833333	264.063	0.0615322	1.06153	TRUE	FALSE	369	291	77.4541
F:\25-03-2022\20220324-SAMPLE BROTH-POS-00.d	2975	scanId=1688247		28.1373	618.335	506.371	2	1234.66	27	1772.09	R.SMVKETYLHK.E	SMVKETYLHK	WP_012295480.1 MULTISPECIES: porphobilinogen synthase [Lysinibacillus]	20	29	1	1234.64	0.0181614	14.7099	1	18	0.0555556	108.67	0.0613234	1.06132	TRUE	FALSE	370	291	77.4541
F:\25-03-2022\20220324-SAMPLE BROTH-POS-00.d	2284	scanId=1275115		21.2518	684.831	525.07	2	1367.65	30	1758.82	K.QEAIQYFNDLQ.-	QEAIQYFNDLQ	WP_150908020.1 MULTISPECIES: riboflavin biosynthesis protein RibF [Lysinibacillus]	306	316	0	1367.64	0.0116808	8.54089	1	20	0.05	107.706	0.0612375	1.06124	TRUE	FALSE	371	291	77.4541
F:\25-03-2022\20220324-SAMPLE BROTH-POS-00.d	4277	scanId=2455634		40.9271	695.378	1252.65	2	1388.74	39	2198.53	R.KDGIAYAM(oxidation of M)VHLR.N	KDGIAYAMVHLR	WP_012295854.1 MULTISPECIES: MMPL family transporter [Lysinibacillus]	105	116	1	1388.72	0.0170675	12.2901	1	22	0.0454545	134.053	0.060974	1.06097	TRUE	FALSE	372	291	77.4541
F:\25-03-2022\20220324-SAMPLE BROTH-POS-00.d	2517	scanId=1415752		23.5957	559.769	781.571	2	1117.52	38	2594.18	K.AGEITEDDLR.G	AGEITEDDLR	WP_089985339.1 MULTISPECIES: ribosome recycling factor [Lysinibacillus]	145	154	0	1117.53	-0.00185988	-1.66429	1	18	0.0555556	158.16	0.0609674	1.06097	TRUE	FALSE	373	291	77.4541
F:\25-03-2022\20220324-SAMPLE BROTH-POS-00.d	3577	scanId=2042753		34.0457	597.83	569.675	2	1193.64	55	4355.89	R.KTYNLTIGER.T	KTYNLTIGER	WP_012295469.1 MULTISPECIES: rod shape-determining protein [Lysinibacillus]	197	206	1	1193.64	0.0041664	3.4905	1	18	0.0555556	263.988	0.0606049	1.0606	TRUE	FALSE	374	291	77.4541
F:\25-03-2022\20220324-SAMPLE BROTH-POS-00.d	4207	scanId=2415003		40.2499	835.935	566.88	2	1669.85	55	3532.54	R.LHFDEMITPGRVGAK.L	LHFDEMITPGRVGAK	DECOY_WP_012293009.1 MULTISPECIES: catalase [Lysinibacillus]	627	641	1	1669.86	-0.00624738	-3.74126	1	28	0.0357143	214.054	0.0605949	1.06059	FALSE	TRUE	374	292	77.513
F:\25-03-2022\20220324-SAMPLE BROTH-POS-00.d	2640	scanId=1488395		24.8065	653.838	550.186	2	1305.66	30	1823.67	K.DITMIGVTGTNGK.T	DITMIGVTGTNGK	WP_031418807.1 MULTISPECIES: UDP-N-acetylmuramoyl-L-alanyl-D-glutamate--2,6-diaminopimelate ligase [Lysinibacillus]	102	114	0	1305.66	0.000893818	0.684572	1	24	0.0416667	110.485	0.060584	1.06058	TRUE	FALSE	375	292	77.513
F:\25-03-2022\20220324-SAMPLE BROTH-POS-00.d	1048	scanId=559525		9.32528	445.218	948.281	2	888.421	31	2397.09	-.M(oxidation of M)LDYFGK.Q	MLDYFGK	DECOY_WP_012292906.1 MULTISPECIES: UDP-N-acetylglucosamine 2-epimerase [Lysinibacillus]	1	7	0	888.405	0.0154001	17.3346	1	12	0.0833333	145.08	0.0605235	1.06052	FALSE	TRUE	375	293	77.6879
F:\25-03-2022\20220324-SAMPLE BROTH-POS-00.d	2818	scanId=1595333		26.5888	573.331	502.621	2	1144.65	29	2180.33	R.QLANLAEMKK.D	QLANLAEMKK	DECOY_WP_012294204.1 MULTISPECIES: MarR family transcriptional regulator [Lysinibacillus]	149	158	1	1144.63	0.0205557	17.9584	1	18	0.0555556	131.75	0.0604266	1.06043	FALSE	TRUE	375	294	77.6879
F:\25-03-2022\20220324-SAMPLE BROTH-POS-00.d	3305	scanId=1885267		31.421	495.778	1031.35	2	989.541	52	3271.89	K.NLTKNC[carbamidomethylation of C]LK.G	NLTKNCLK	WP_031416459.1 MULTISPECIES: isochorismate synthase [Lysinibacillus]	88	95	1	989.533	0.00779458	7.87703	1	14	0.0714286	197.703	0.0604246	1.06042	TRUE	FALSE	376	294	77.6879
F:\25-03-2022\20220324-SAMPLE BROTH-POS-00.d	3345	scanId=1908485		31.808	599.797	569.009	2	1197.58	42	2799.59	K.QNRAMEFFR.A	QNRAMEFFR	DECOY_WP_012292635.1 MULTISPECIES: AAA family ATPase [Lysinibacillus]	672	680	1	1197.57	0.00738316	6.16511	1	16	0.0625	169.001	0.0603662	1.06037	FALSE	TRUE	376	295	77.6879
F:\25-03-2022\20220324-SAMPLE BROTH-POS-00.d	3223	scanId=1835288		30.588	714.87	627.737	2	1427.73	41	2590.01	R.AYIEHVGTWQPK.L	AYIEHVGTWQPK	WP_012293844.1 MULTISPECIES: SEC-C domain-containing protein [Lysinibacillus]	55	66	0	1427.72	0.00582541	4.08022	1	22	0.0454545	156.144	0.0602871	1.06029	TRUE	FALSE	377	295	77.6879
F:\25-03-2022\20220324-SAMPLE BROTH-POS-00.d	2332	scanId=1303603		21.7266	702.858	512.88	2	1403.7	39	2278.61	K.SDLERTDLAKEK.T	SDLERTDLAKEK	WP_107922374.1 MULTISPECIES: leucine--tRNA ligase [Lysinibacillus]	289	300	2	1403.73	-0.0237491	-16.9186	1	22	0.0454545	136.681	0.0599841	1.05998	TRUE	FALSE	378	295	77.6879
F:\25-03-2022\20220324-SAMPLE BROTH-POS-00.d	2531	scanId=1424506		23.7416	698.347	342.959	2	1394.68	27	1409.01	K.QVGPFC[carbamidomethylation of C]AFVASGR.H	QVGPFCAFVASGR	DECOY_WP_012293980.1 MULTISPECIES: iron uptake transporter deferrochelatase/peroxidase subunit [Lysinibacillus]	15	27	0	1394.68	0.00389988	2.79626	1	24	0.0416667	84.4059	0.0599042	1.0599	FALSE	TRUE	378	296	77.9512
F:\25-03-2022\20220324-SAMPLE BROTH-POS-00.d	2049	scanId=1135749		18.929	446.734	816.372	2	891.453	39	2668.35	K.FEVVDQR.K	FEVVDQR	DECOY_WP_012294071.1 MULTISPECIES: hypothetical protein [Lysinibacillus]	54	60	0	891.445	0.00801573	8.99184	1	12	0.0833333	159.248	0.0596802	1.05968	FALSE	TRUE	378	297	78.2146
F:\25-03-2022\20220324-SAMPLE BROTH-POS-00.d	4441	scanId=2551080		42.5179	681.373	2051.34	2	1360.73	73	5820.91	R.HKFTASPEGFLK.I	HKFTASPEGFLK	DECOY_WP_012295214.1 MULTISPECIES: ABC transporter ATP-binding protein [Lysinibacillus]	176	187	1	1360.71	0.0165768	12.1824	1	22	0.0454545	345.792	0.0594051	1.05941	FALSE	TRUE	378	298	78.4779
F:\25-03-2022\20220324-SAMPLE BROTH-POS-00.d	2426	scanId=1360620		22.6769	502.271	625.388	2	1002.53	42	2829.69	K.GQVKSGVEIS.-	GQVKSGVEIS	DECOY_WP_008180281.1 MULTISPECIES: S1 domain-containing RNA-binding protein [Lysinibacillus]	136	145	1	1002.53	-0.00739258	-7.37389	1	18	0.0555556	168.07	0.0593952	1.0594	FALSE	TRUE	378	299	78.5335
F:\25-03-2022\20220324-SAMPLE BROTH-POS-00.d	2253	scanId=1256161		20.9359	551.785	679.283	2	1101.55	28	1896.17	-.M(oxidation of M)KSHDIEVK.A	MKSHDIEVK	WP_206701022.1 MULTISPECIES: sodium:proton antiporter [Lysinibacillus]	1	9	1	1101.55	0.00587883	5.33688	1	16	0.0625	112.322	0.0592361	1.05924	TRUE	FALSE	379	299	78.5335
F:\25-03-2022\20220324-SAMPLE BROTH-POS-00.d	3474	scanId=1984559		33.0759	790.925	510.62	2	1579.83	44	2636.57	R.AEYIM(oxidation of M)GIVGLPVM(oxidation of M)R.K	AEYIMGIVGLPVMR	DECOY_WP_012293884.1 MULTISPECIES: glutamate-5-semialdehyde dehydrogenase [Lysinibacillus]	294	307	0	1579.81	0.0245534	15.542	1	26	0.0384615	155.042	0.0588044	1.0588	FALSE	TRUE	379	300	78.7961
F:\25-03-2022\20220324-SAMPLE BROTH-POS-00.d	4456	scanId=2558809		42.6467	403.74	3287.94	2	805.466	60	5805.95	-.MRIMKK.L	MRIMKK	DECOY_WP_053595320.1 MULTISPECIES: 6,7-dimethyl-8-ribityllumazine synthase [Lysinibacillus]	1	6	2	805.467	-0.000591973	-0.734944	1	10	0.1	340.494	0.0586457	1.05865	FALSE	TRUE	379	301	78.8507
F:\25-03-2022\20220324-SAMPLE BROTH-POS-00.d	5168	scanId=2932696		48.8781	978.941	740.461	2	1955.87	78	5224.99	K.VEHYESFSDFDELIAR.A	VEHYESFSDFDELIAR	WP_012295643.1 MULTISPECIES: tRNA 4-thiouridine(8) synthase ThiI [Lysinibacillus]	363	378	0	1955.89	-0.0232972	-11.9113	1	30	0.0333333	305.356	0.0584413	1.05844	TRUE	FALSE	380	301	78.8507
F:\25-03-2022\20220324-SAMPLE BROTH-POS-00.d	4533	scanId=2602627		43.377	445.75	4621.31	2	889.485	101	9364.72	K.ELISC[carbamidomethylation of C]LR.A	ELISCLR	DECOY_WP_089933581.1 MULTISPECIES: arginine--tRNA ligase [Lysinibacillus]	102	108	0	889.469	0.0160451	18.039	1	12	0.0833333	546.681	0.0583766	1.05838	FALSE	TRUE	380	302	78.9591
F:\25-03-2022\20220324-SAMPLE BROTH-POS-00.d	4470	scanId=2566841		42.7805	757.415	841.47	2	1512.81	49	3199.43	K.RKEAEAIEEPTLK.V	RKEAEAIEEPTLK	DECOY_WP_012292591.1 MULTISPECIES: Na+/H+ antiporter NhaC [Lysinibacillus]	18	30	2	1512.81	0.000177194	0.117129	1	24	0.0416667	186.448	0.0582754	1.05828	FALSE	TRUE	380	303	78.9591
F:\25-03-2022\20220324-SAMPLE BROTH-POS-00.d	4305	scanId=2471774		41.1961	501.262	1296.54	2	1000.51	44	4495.85	R.KQMLYYR.M	KQMLYYR	WP_051563316.1 MULTISPECIES: glycosyltransferase family 4 protein [Lysinibacillus]	119	125	1	1000.52	-0.0062926	-6.28936	1	12	0.0833333	260.922	0.0580361	1.05804	TRUE	FALSE	381	303	78.9591
F:\25-03-2022\20220324-SAMPLE BROTH-POS-00.d	4040	scanId=2319086		38.6513	693.889	442.947	2	1385.76	28	1688.96	R.SEIETIVGAILNK.A	SEIETIVGAILNK	WP_012293148.1 MULTISPECIES: 2-dehydropantoate 2-reductase [Lysinibacillus]	261	273	0	1385.78	-0.0136597	-9.85706	1	24	0.0416667	97.5763	0.0577729	1.05777	TRUE	FALSE	382	303	78.9591
F:\25-03-2022\20220324-SAMPLE BROTH-POS-00.d	3777	scanId=2162817		36.0468	500.295	592.892	2	998.576	37	2739.18	K.EIVEQIIR.E	EIVEQIIR	DECOY_WP_025114538.1 MULTISPECIES: MarR family transcriptional regulator [Lysinibacillus]	37	44	0	998.576	-0.000326965	-0.327432	1	14	0.0714286	158.184	0.0577488	1.05775	FALSE	TRUE	382	304	79.2197
F:\25-03-2022\20220324-SAMPLE BROTH-POS-00.d	427	scanId=229416		3.82347	283.175	781.758	2	564.335	31	2591.72	K.ALPHK.A	ALPHK	DECOY_WP_012292149.1 MULTISPECIES: RluA family pseudouridine synthase [Lysinibacillus]	144	148	0	564.338	-0.00374452	-6.63524	1	8	0.125	149.546	0.0577014	1.0577	FALSE	TRUE	382	305	79.4803
F:\25-03-2022\20220324-SAMPLE BROTH-POS-00.d	2821	scanId=1597050		26.6174	780.911	625.752	2	1559.81	43	2368.96	R.AIMGMKVNEAINNR.E	AIMGMKVNEAINNR	DECOY_WP_227256943.1 MULTISPECIES: recombinase family protein [Lysinibacillus]	396	409	1	1559.79	0.0166068	10.6468	1	26	0.0384615	136.565	0.0576478	1.05765	FALSE	TRUE	382	306	79.7409
F:\25-03-2022\20220324-SAMPLE BROTH-POS-00.d	4385	scanId=2519468		41.991	945.976	666.295	2	1889.94	31	2016.56	K.WQLLFPC[carbamidomethylation of C]EMLPTVTR.V	WQLLFPCEMLPTVTR	DECOY_WP_227256840.1 MULTISPECIES: urease accessory protein UreF [Lysinibacillus]	110	124	0	1889.95	-0.0163682	-8.66062	1	28	0.0357143	116.205	0.0576252	1.05763	FALSE	TRUE	382	307	79.7926
F:\25-03-2022\20220324-SAMPLE BROTH-POS-00.d	2404	scanId=1346157		22.4358	528.763	608.963	2	1055.51	37	2232.85	K.MEQHLGVSR.Y	MEQHLGVSR	WP_206700908.1 MULTISPECIES: RloB domain-containing protein [Lysinibacillus]	121	129	0	1055.52	-0.00732556	-6.94025	1	16	0.0625	128.596	0.0575927	1.05759	TRUE	FALSE	383	307	79.7926
F:\25-03-2022\20220324-SAMPLE BROTH-POS-00.d	4046	scanId=2322688		38.7113	799.429	430.431	2	1596.84	44	2785.29	K.LPTNFPLITAEEPR.N	LPTNFPLITAEEPR	DECOY_WP_012294172.1 MULTISPECIES: collagenase [Lysinibacillus]	91	104	0	1596.85	-0.00727991	-4.55892	1	26	0.0384615	160.41	0.0575919	1.05759	FALSE	TRUE	383	308	80.0525
F:\25-03-2022\20220324-SAMPLE BROTH-POS-00.d	3915	scanId=2245932		37.4321	810.43	485.585	2	1618.84	37	2524.09	K.VAKWLAFDLADDKK.E	VAKWLAFDLADDKK	DECOY_WP_068986561.1 MULTISPECIES: cysteine--tRNA ligase [Lysinibacillus]	281	294	2	1618.87	-0.0270766	-16.7256	1	26	0.0384615	145.055	0.0574684	1.05747	FALSE	TRUE	383	309	80.3124
F:\25-03-2022\20220324-SAMPLE BROTH-POS-00.d	4429	scanId=2543496		42.3915	403.738	2042.26	2	805.462	61	6607.65	-.MRIMKK.L	MRIMKK	DECOY_WP_053595320.1 MULTISPECIES: 6,7-dimethyl-8-ribityllumazine synthase [Lysinibacillus]	1	6	2	805.467	-0.00443695	-5.50854	1	10	0.1	378.885	0.0573403	1.05734	FALSE	TRUE	383	310	80.5723
F:\25-03-2022\20220324-SAMPLE BROTH-POS-00.d	2987	scanId=1696001		28.2665	767.387	422.25	2	1532.76	34	2084.56	K.SGGSATDGKIGPETEK.V	SGGSATDGKIGPETEK	DECOY_WP_126657056.1 MULTISPECIES: elongation factor P [Lysinibacillus]	38	53	1	1532.73	0.0266206	17.3681	1	30	0.0333333	119.03	0.0571011	1.0571	FALSE	TRUE	383	311	80.6217
F:\25-03-2022\20220324-SAMPLE BROTH-POS-00.d	3169	scanId=1804203		30.0699	658.833	490.29	2	1315.65	37	1901.47	R.ISELARVAEDDV.-	ISELARVAEDDV	WP_012295793.1 MULTISPECIES: PH domain-containing protein [Lysinibacillus]	148	159	1	1315.66	-0.00959239	-7.29092	1	22	0.0454545	108.485	0.0570533	1.05705	TRUE	FALSE	384	311	80.6217
F:\25-03-2022\20220324-SAMPLE BROTH-POS-00.d	2714	scanId=1533826		25.5636	561.276	720.498	2	1120.54	30	1788.63	K.QTASAGSTGWR.A	QTASAGSTGWR	DECOY_WP_024363854.1 MULTISPECIES: ribonuclease HIII [Lysinibacillus]	236	246	0	1120.53	0.0108523	9.68501	1	20	0.05	101.665	0.0568395	1.05684	FALSE	TRUE	384	312	80.6709
F:\25-03-2022\20220324-SAMPLE BROTH-POS-00.d	3381	scanId=1930475		32.1745	600.799	699.348	2	1199.58	42	2811.68	K.YFFTEQPLR.E	YFFTEQPLR	WP_012295696.1 MULTISPECIES: UDP-N-acetylmuramate--L-alanine ligase [Lysinibacillus]	36	44	0	1199.6	-0.0133136	-11.0984	1	16	0.0625	159.442	0.0567071	1.05671	TRUE	FALSE	385	312	80.6709
F:\25-03-2022\20220324-SAMPLE BROTH-POS-00.d	1627	scanId=888898		14.8148	658.81	335.747	2	1315.61	23	1464.14	R.EADVFM(oxidation of M)NGVYR.K	EADVFMNGVYR	DECOY_WP_036160536.1 MULTISPECIES: pyridoxamine kinase [Lysinibacillus]	76	86	0	1315.59	0.0183566	13.9532	1	20	0.05	83.0045	0.0566916	1.05669	FALSE	TRUE	385	313	80.9294
F:\25-03-2022\20220324-SAMPLE BROTH-POS-00.d	1845	scanId=1015980		16.9329	733.839	449.853	2	1465.66	28	1640.28	M.AEEKAAEERMM(oxidation of M)R.M	AEEKAAEERMMR	DECOY_WP_171821109.1 MULTISPECIES: ribonuclease III [Lysinibacillus]	2	13	2	1465.67	-0.00105473	-0.719622	1	22	0.0454545	92.7784	0.0565627	1.05656	FALSE	TRUE	385	314	81.188
F:\25-03-2022\20220324-SAMPLE BROTH-POS-00.d	3006	scanId=1706249		28.4373	593.321	533.543	2	1184.63	34	2282.41	R.KMYRTM(oxidation of M)AIR.A	KMYRTMAIR	DECOY_WP_010860599.1 MULTISPECIES: 50S ribosomal protein L16 [Lysinibacillus]	87	95	2	1184.62	0.0118121	9.97124	1	16	0.0625	128.854	0.0564549	1.05645	FALSE	TRUE	385	315	81.4466
F:\25-03-2022\20220324-SAMPLE BROTH-POS-00.d	2721	scanId=1537926		25.632	538.291	858.194	2	1074.57	42	3124.03	R.LPNSQEFLK.F	LPNSQEFLK	DECOY_WP_031418727.1 MULTISPECIES: permease-like cell division protein FtsX [Lysinibacillus]	177	185	0	1074.57	-0.00362773	-3.37598	1	16	0.0625	176.05	0.0563534	1.05635	FALSE	TRUE	385	316	81.6786
F:\25-03-2022\20220324-SAMPLE BROTH-POS-00.d	3896	scanId=2233909		37.2317	621.311	540.49	2	1240.61	24	1635.64	R.LM(oxidation of M)EM(oxidation of M)AIKSMR.S	LMEMAIKSMR	DECOY_WP_012291833.1 MULTISPECIES: DNA gyrase subunit A [Lysinibacillus]	687	696	1	1240.6	0.0094727	7.63559	1	18	0.0555556	92.1302	0.0563265	1.05633	FALSE	TRUE	385	317	81.6786
F:\25-03-2022\20220324-SAMPLE BROTH-POS-00.d	3605	scanId=2060478		34.3412	771.341	654.815	2	1540.67	54	3844.7	K.NATESSEAMKNMTK.G	NATESSEAMKNMTK	WP_012295897.1 MULTISPECIES: methyl-accepting chemotaxis protein [Lysinibacillus]	305	318	1	1540.69	-0.01961	-12.7281	1	26	0.0384615	216.219	0.0562382	1.05624	TRUE	FALSE	386	317	81.6786
F:\25-03-2022\20220324-SAMPLE BROTH-POS-00.d	4267	scanId=2450370		40.8394	523.272	1551.88	2	1044.53	35	3643.5	K.TVVVDDEIR.V	TVVVDDEIR	DECOY_WP_012295632.1 MULTISPECIES: Xaa-Pro peptidase family protein [Lysinibacillus]	19	27	0	1044.55	-0.0148002	-14.1691	1	16	0.0625	204.604	0.0561559	1.05616	FALSE	TRUE	386	318	81.6786
F:\25-03-2022\20220324-SAMPLE BROTH-POS-00.d	3393	scanId=1937843		32.2972	712.843	533.868	2	1423.67	54	3812.52	R.IMMERTQEMQK.L	IMMERTQEMQK	DECOY_WP_010858200.1 MULTISPECIES: aspartyl-phosphate phosphatase Spo0E family protein [Lysinibacillus]	49	59	1	1423.66	0.00884421	6.21229	1	20	0.05	214.092	0.056155	1.05615	FALSE	TRUE	386	319	81.6786
F:\25-03-2022\20220324-SAMPLE BROTH-POS-00.d	2441	scanId=1368986		22.8163	566.774	648.866	2	1131.53	29	2019.74	K.AVGMDAFEHR.N	AVGMDAFEHR	WP_012295214.1 MULTISPECIES: ABC transporter ATP-binding protein [Lysinibacillus]	128	137	0	1131.51	0.0213089	18.8322	1	18	0.0555556	112.209	0.0555561	1.05556	TRUE	FALSE	387	319	81.6786
F:\25-03-2022\20220324-SAMPLE BROTH-POS-00.d	1924	scanId=1062866		17.7143	416.731	474.722	2	831.448	28	1870.48	K.SAIVTGER.I	SAIVTGER	WP_206700857.1 MULTISPECIES: phosphoribosylformylglycinamidine cyclo-ligase [Lysinibacillus]	181	188	0	831.445	0.00280276	3.37095	1	14	0.0714286	103.711	0.0554461	1.05545	TRUE	FALSE	388	319	81.6786
F:\25-03-2022\20220324-SAMPLE BROTH-POS-00.d	3949	scanId=2265333		37.7554	362.212	716.171	2	722.41	30	2457.85	K.FTNITK.T	FTNITK	DECOY_WP_036162376.1 MULTISPECIES: methyl-accepting chemotaxis protein [Lysinibacillus]	4	9	0	722.396	0.0135202	18.7157	1	10	0.1	135.75	0.0552312	1.05523	FALSE	TRUE	388	320	81.6786
F:\25-03-2022\20220324-SAMPLE BROTH-POS-00.d	1283	scanId=691373		11.5228	726.355	334.67	2	1450.7	29	1829.54	R.LEAGMQLNIYHY.-	LEAGMQLNIYHY	WP_031419624.1 MULTISPECIES: glucosaminidase domain-containing protein [Lysinibacillus]	241	252	0	1450.69	0.00492009	3.39154	1	22	0.0454545	100.811	0.0551018	1.0551	TRUE	FALSE	389	320	81.6786
F:\25-03-2022\20220324-SAMPLE BROTH-POS-00.d	2249	scanId=1253945		20.8989	674.799	734.019	2	1347.58	26	1526.66	R.MMTGLM(oxidation of M)HPTEGK.V	MMTGLMHPTEGK	WP_012293992.1 MULTISPECIES: ABC transporter ATP-binding protein [Lysinibacillus]	50	61	0	1347.6	-0.0151332	-11.2298	1	22	0.0454545	84.0839	0.0550771	1.05508	TRUE	FALSE	390	320	81.6786
F:\25-03-2022\20220324-SAMPLE BROTH-POS-00.d	4158	scanId=2386248		39.7707	788.889	552.176	2	1575.76	45	3132.57	K.MIADWKAQEETVR.A	MIADWKAQEETVR	DECOY_WP_012295562.1 MULTISPECIES: succinate dehydrogenase flavoprotein subunit [Lysinibacillus]	146	158	1	1575.77	-0.00732811	-4.65049	1	24	0.0416667	172.199	0.0549703	1.05497	FALSE	TRUE	390	321	81.9338
F:\25-03-2022\20220324-SAMPLE BROTH-POS-00.d	2625	scanId=1479914		24.6651	857.964	697.696	2	1713.91	27	1463.97	R.QSYILGFTRTMNRK.M	QSYILGFTRTMNRK	DECOY_WP_012292010.1 MULTISPECIES: adenylosuccinate lyase [Lysinibacillus]	78	91	2	1713.9	0.0148756	8.67941	1	26	0.0384615	80.1894	0.0547752	1.05478	FALSE	TRUE	390	322	82.0683
F:\25-03-2022\20220324-SAMPLE BROTH-POS-00.d	2979	scanId=1691017		28.1835	420.75	1270.78	2	839.486	42	3736.76	R.LPNEVIR.I	LPNEVIR	DECOY_WP_012295792.1 MULTISPECIES: PH domain-containing protein [Lysinibacillus]	190	196	0	839.487	-0.000987549	-1.17637	1	12	0.0833333	204.005	0.0545942	1.05459	FALSE	TRUE	390	323	82.0683
F:\25-03-2022\20220324-SAMPLE BROTH-POS-00.d	1956	scanId=1081598		18.0265	632.334	522.606	2	1262.65	25	1329.66	K.NNVRFSNTRR.D	NNVRFSNTRR	WP_012292053.1 MULTISPECIES: SpoVR family protein [Lysinibacillus]	111	120	2	1262.66	-0.00640175	-5.07005	1	18	0.0555556	72.2224	0.0543164	1.05432	TRUE	FALSE	391	323	82.0683
F:\25-03-2022\20220324-SAMPLE BROTH-POS-00.d	2347	scanId=1312470		21.8744	451.27	808.197	2	900.526	35	2840.7	K.NRIARSGK.M	NRIARSGK	DECOY_WP_012293075.1 MULTISPECIES: bifunctional lysylphosphatidylglycerol flippase/synthetase MprF [Lysinibacillus]	196	203	2	900.525	0.000482649	0.535963	1	14	0.0714286	154.24	0.0542966	1.0543	FALSE	TRUE	391	324	82.0683
F:\25-03-2022\20220324-SAMPLE BROTH-POS-00.d	543	scanId=289501		4.82488	496.765	734.757	2	991.515	60	4758.4	K.SSSKEDVLK.W	SSSKEDVLK	WP_012295782.1 MULTISPECIES: RNA polymerase sigma factor SigB [Lysinibacillus]	9	17	1	991.519	-0.00401193	-4.04624	1	16	0.0625	257.813	0.0541807	1.05418	TRUE	FALSE	392	324	82.0683
F:\25-03-2022\20220324-SAMPLE BROTH-POS-00.d	2511	scanId=1412369		23.5393	446.244	985.761	2	890.473	43	2988.17	-.M(oxidation of M)LEKQAR.C	MLEKQAR	WP_012296165.1 MULTISPECIES: diguanylate cyclase [Lysinibacillus]	1	7	1	890.464	0.00823852	9.25193	1	12	0.0833333	160.736	0.0537907	1.05379	TRUE	FALSE	393	324	82.0683
F:\25-03-2022\20220324-SAMPLE BROTH-POS-00.d	4216	scanId=2420656		40.3441	838.43	631.16	2	1674.85	35	1774.6	K.LHEGGGFATNGIFVTR.S	LHEGGGFATNGIFVTR	DECOY_WP_012293129.1 MULTISPECIES: DUF420 domain-containing protein [Lysinibacillus]	83	98	0	1674.85	-0.00277589	-1.6574	1	30	0.0333333	95.4065	0.0537623	1.05376	FALSE	TRUE	393	325	82.3216
F:\25-03-2022\20220324-SAMPLE BROTH-POS-00.d	2533	scanId=1425891		23.7647	478.791	977.701	2	955.567	39	3377.78	M.KEVKEPVK.I	KEVKEPVK	DECOY_WP_012293320.1 MULTISPECIES: BMP family protein [Lysinibacillus]	2	9	2	955.57	-0.00283321	-2.96495	1	14	0.0714286	181.213	0.0536486	1.05365	FALSE	TRUE	393	326	82.3653
F:\25-03-2022\20220324-SAMPLE BROTH-POS-00.d	3398	scanId=1940226		32.337	536.287	901.431	2	1070.56	42	3214.61	K.TYVSVEFVK.E	TYVSVEFVK	WP_031419759.1 MULTISPECIES: stalk domain-containing protein [Lysinibacillus]	304	312	0	1070.56	-0.00628636	-5.872	1	16	0.0625	171.537	0.0533618	1.05336	TRUE	FALSE	394	326	82.3653
F:\25-03-2022\20220324-SAMPLE BROTH-POS-00.d	3943	scanId=2262284		37.7046	601.816	487.073	2	1201.62	25	1737.39	K.VNLMELVEQK.D	VNLMELVEQK	DECOY_WP_031419316.1 MULTISPECIES: endopeptidase La [Lysinibacillus]	588	597	0	1201.64	-0.020708	-17.2332	1	18	0.0555556	92.35	0.0531545	1.05315	FALSE	TRUE	394	327	82.417
F:\25-03-2022\20220324-SAMPLE BROTH-POS-00.d	3569	scanId=2038320		33.9719	572.32	808.536	2	1142.63	43	2646.58	K.EIAKGNEARR.L	EIAKGNEARR	DECOY_WP_012291998.1 MULTISPECIES: MoxR family ATPase [Lysinibacillus]	125	134	2	1142.62	0.00987029	8.63833	1	18	0.0555556	139.68	0.0527777	1.05278	FALSE	TRUE	394	328	82.417
F:\25-03-2022\20220324-SAMPLE BROTH-POS-00.d	2115	scanId=1174534		19.5754	652.83	347.921	2	1303.64	30	1861.31	K.FAKGDAYYELK.E	FAKGDAYYELK	DECOY_WP_012293446.1 MULTISPECIES: FAD-dependent monooxygenase [Lysinibacillus]	278	288	1	1303.64	-0.000331551	-0.254326	1	20	0.05	98.0043	0.0526534	1.05265	FALSE	TRUE	394	329	82.417
F:\25-03-2022\20220324-SAMPLE BROTH-POS-00.d	1722	scanId=944597		15.7431	610.794	418.014	2	1219.57	28	1710.02	K.EDIM(oxidation of M)DALIER.Y	EDIMDALIER	WP_036161353.1 MULTISPECIES: TetR/AcrR family transcriptional regulator [Lysinibacillus]	54	63	0	1219.58	-0.00148429	-1.21706	1	18	0.0555556	90.0346	0.0526513	1.05265	TRUE	FALSE	395	329	82.417
F:\25-03-2022\20220324-SAMPLE BROTH-POS-00.d	3386	scanId=1933191		32.2197	522.298	1040.1	2	1042.58	41	4317.68	K.QVSLLDNVR.M	QVSLLDNVR	WP_227256907.1 MULTISPECIES: NEAT domain-containing protein [Lysinibacillus]	233	241	0	1042.58	0.00393593	3.77519	1	16	0.0625	225.878	0.0523146	1.05231	TRUE	FALSE	396	329	82.417
F:\25-03-2022\20220324-SAMPLE BROTH-POS-00.d	3347	scanId=1909870		31.831	672.357	780.301	2	1342.7	26	1782.27	M.VM(oxidation of M)SAVFYELIR.T	VMSAVFYELIR	DECOY_WP_012291842.1 MULTISPECIES: pyridoxal 5'-phosphate synthase glutaminase subunit PdxT [Lysinibacillus]	2	12	0	1342.7	0.00484371	3.60745	1	20	0.05	93.0512	0.0522094	1.05221	FALSE	TRUE	396	330	82.417
F:\25-03-2022\20220324-SAMPLE BROTH-POS-00.d	4145	scanId=2379319		39.6552	676.347	731.478	2	1350.68	37	2095.44	K.KVEEKTNSTMGK.F	KVEEKTNSTMGK	WP_036122138.1 MULTISPECIES: YbaB/EbfC family nucleoid-associated protein [Lysinibacillus]	84	95	2	1350.68	-0.00099221	-0.734599	1	22	0.0454545	109.305	0.0521634	1.05216	TRUE	FALSE	397	330	82.417
F:\25-03-2022\20220324-SAMPLE BROTH-POS-00.d	3141	scanId=1787467		29.791	637.848	435.005	2	1273.68	24	1585.45	K.KESAEQVEVKK.M	KESAEQVEVKK	DECOY_WP_008181911.1 MULTISPECIES: 30S ribosomal protein S19 [Lysinibacillus]	67	77	2	1273.69	-0.00609242	-4.78329	1	20	0.05	82.654	0.0521328	1.05213	FALSE	TRUE	397	331	82.417
F:\25-03-2022\20220324-SAMPLE BROTH-POS-00.d	2521	scanId=1417969		23.6327	703.334	405.053	2	1404.65	27	1494.58	R.GETREEGYHISK.V	GETREEGYHISK	DECOY_WP_107922622.1 MULTISPECIES: isoleucine--tRNA ligase [Lysinibacillus]	20	31	1	1404.66	-0.00903097	-6.42928	1	22	0.0454545	77.8804	0.0521087	1.05211	FALSE	TRUE	397	332	82.417
F:\25-03-2022\20220324-SAMPLE BROTH-POS-00.d	2536	scanId=1427608		23.7933	618.322	589	2	1234.63	30	1707.81	K.TLKGSEIM(oxidation of M)GAGR.E	TLKGSEIMGAGR	WP_217580422.1 MULTISPECIES: phage head closure protein [Lysinibacillus]	50	61	1	1234.63	-0.00354747	-2.8733	1	22	0.0454545	88.1636	0.0516237	1.05162	TRUE	FALSE	398	332	82.417
F:\25-03-2022\20220324-SAMPLE BROTH-POS-00.d	1504	scanId=818707		13.645	696.367	407.778	2	1390.72	20	1590.16	K.VHLM(oxidation of M)LSLTYTTP.-	VHLMLSLTYTTP	WP_036196570.1 MULTISPECIES: helix-turn-helix domain-containing protein [Lysinibacillus]	168	179	0	1390.72	0.00321938	2.31491	1	22	0.0454545	81.5319	0.0512728	1.05127	TRUE	FALSE	399	332	82.417
F:\25-03-2022\20220324-SAMPLE BROTH-POS-00.d	1112	scanId=595734		9.92877	260.149	938.28	2	518.284	36	4559.3	K.SGISR.A	SGISR	WP_012293689.1 MULTISPECIES: spore germination protein [Lysinibacillus]	456	460	0	518.281	0.00286762	5.53293	1	8	0.125	233.707	0.0512594	1.05126	TRUE	FALSE	400	332	82.417
F:\25-03-2022\20220324-SAMPLE BROTH-POS-00.d	2693	scanId=1520636		25.3438	813.865	393.293	2	1625.72	31	2103.2	R.EVGYSDEFYFSRK.F	EVGYSDEFYFSRK	WP_012292471.1 MULTISPECIES: AraC family transcriptional regulator [Lysinibacillus]	88	100	1	1625.74	-0.0198551	-12.213	1	24	0.0416667	107.229	0.0509834	1.05098	TRUE	FALSE	401	332	82.417
F:\25-03-2022\20220324-SAMPLE BROTH-POS-00.d	1932	scanId=1067633		17.7937	461.746	904.281	2	921.478	39	2234.25	-.MVFQRGGK.R	MVFQRGGK	DECOY_WP_012293973.1 MULTISPECIES: iron ABC transporter permease [Lysinibacillus]	1	8	1	921.485	-0.00719561	-7.8087	1	14	0.0714286	113.73	0.050903	1.0509	FALSE	TRUE	401	333	82.6652
F:\25-03-2022\20220324-SAMPLE BROTH-POS-00.d	2762	scanId=1562142		26.0356	701.861	456.188	2	1401.71	35	1991.02	R.SQTRPMIADIDR.D	SQTRPMIADIDR	DECOY_WP_036162134.1 MULTISPECIES: heme o synthase [Lysinibacillus]	219	230	0	1401.7	0.00371882	2.65307	1	22	0.0454545	101.047	0.0507514	1.05075	FALSE	TRUE	401	334	82.7072
F:\25-03-2022\20220324-SAMPLE BROTH-POS-00.d	1641	scanId=897433		14.9571	373.72	695.013	2	745.426	36	2454.45	K.DEKVKK.Y	DEKVKK	WP_036162483.1 MULTISPECIES: DUF4263 domain-containing protein [Lysinibacillus]	148	153	2	745.433	-0.00704159	-9.4463	1	10	0.1	124.388	0.0506785	1.05068	TRUE	FALSE	402	334	82.7072
F:\25-03-2022\20220324-SAMPLE BROTH-POS-00.d	2886	scanId=1635607		27.26	506.792	872.818	2	1011.57	45	2865.8	-.M(oxidation of M)FSKKLSR.R	MFSKKLSR	DECOY_WP_036160667.1 MULTISPECIES: DUF4395 domain-containing protein [Lysinibacillus]	1	8	2	1011.55	0.0150127	14.8413	1	14	0.0714286	145.102	0.0506323	1.05063	FALSE	TRUE	402	335	82.9548
F:\25-03-2022\20220324-SAMPLE BROTH-POS-00.d	3082	scanId=1752231		29.2037	732.858	388.622	2	1463.7	27	1237.05	R.GDILYRC[carbamidomethylation of C]ISDPR.V	GDILYRCISDPR	DECOY_WP_012293689.1 MULTISPECIES: spore germination protein [Lysinibacillus]	244	255	1	1463.72	-0.018488	-12.6308	1	22	0.0454545	62.6338	0.0506315	1.05063	FALSE	TRUE	402	336	83.2025
F:\25-03-2022\20220324-SAMPLE BROTH-POS-00.d	1145	scanId=615133		10.2521	815.945	374.452	2	1629.88	24	1515.33	R.KQM(oxidation of M)ANIIVEGKLDR.V	KQMANIIVEGKLDR	DECOY_WP_012295644.1 MULTISPECIES: cysteine desulfurase [Lysinibacillus]	70	83	2	1629.89	-0.0113274	-6.94978	1	26	0.0384615	76.7222	0.0506306	1.05063	FALSE	TRUE	402	337	83.4501
F:\25-03-2022\20220324-SAMPLE BROTH-POS-00.d	3574	scanId=2041036		34.0171	645.823	1115.71	2	1289.63	61	5301.43	R.SVLTGDSHYRR.D	SVLTGDSHYRR	DECOY_WP_012293790.1 MULTISPECIES: 5-oxoprolinase subunit PxpA [Lysinibacillus]	68	78	1	1289.65	-0.0152223	-11.8034	1	20	0.05	267.342	0.0504284	1.05043	FALSE	TRUE	402	338	83.6977
F:\25-03-2022\20220324-SAMPLE BROTH-POS-00.d	2654	scanId=1497147		24.9523	687.88	927.575	2	1373.75	47	3018.83	R.ELISLMDELAIK.M	ELISLMDELAIK	DECOY_WP_012295578.1 MULTISPECIES: phenylalanine--tRNA ligase subunit beta [Lysinibacillus]	368	379	0	1373.75	-0.00239795	-1.74555	1	22	0.0454545	151.481	0.0501785	1.05018	FALSE	TRUE	402	339	83.737
F:\25-03-2022\20220324-SAMPLE BROTH-POS-00.d	3133	scanId=1782316		29.7051	776.403	463.225	2	1550.79	45	2527.66	K.ASERVPMTALYVSK.L	ASERVPMTALYVSK	WP_036160881.1 MULTISPECIES: CoA-acylating methylmalonate-semialdehyde dehydrogenase [Lysinibacillus]	180	193	1	1550.81	-0.0211385	-13.6306	1	26	0.0384615	126.329	0.0499787	1.04998	TRUE	FALSE	403	339	83.737
F:\25-03-2022\20220324-SAMPLE BROTH-POS-00.d	3132	scanId=1781983		29.6996	629.349	665.52	2	1256.68	44	3442.05	K.ELSEGIRQVAR.N	ELSEGIRQVAR	DECOY_WP_036162376.1 MULTISPECIES: methyl-accepting chemotaxis protein [Lysinibacillus]	90	100	1	1256.68	-0.00117001	-0.931032	1	20	0.05	171.426	0.0498035	1.0498	FALSE	TRUE	403	340	83.984
F:\25-03-2022\20220324-SAMPLE BROTH-POS-00.d	1902	scanId=1049729		17.4953	421.26	490.235	2	840.505	23	1823.16	R.IHVMLTK.D	IHVMLTK	DECOY_WP_012295951.1 MULTISPECIES: response regulator transcription factor [Lysinibacillus]	31	37	0	840.489	0.0156927	18.6709	1	12	0.0833333	90.1699	0.049458	1.04946	FALSE	TRUE	403	341	84.2311
F:\25-03-2022\20220324-SAMPLE BROTH-POS-00.d	1991	scanId=1101662		18.3609	770.367	311.693	2	1538.72	23	1253.24	R.VQYHMQVMQGYR.K	VQYHMQVMQGYR	DECOY_WP_036162774.1 MULTISPECIES: dihydrofolate reductase family protein [Lysinibacillus]	6	17	0	1538.71	0.00699154	4.54376	1	22	0.0454545	61.7967	0.0493094	1.04931	FALSE	TRUE	403	342	84.4781
F:\25-03-2022\20220324-SAMPLE BROTH-POS-00.d	3258	scanId=1857782		30.9629	814.429	634.831	2	1626.84	42	2359.1	R.MAVPRGADIEQLAEK.L	MAVPRGADIEQLAEK	DECOY_WP_036160547.1 MULTISPECIES: C39 family peptidase [Lysinibacillus]	72	86	1	1626.84	0.00280357	1.72332	1	28	0.0357143	116.096	0.049212	1.04921	FALSE	TRUE	403	343	84.5154
F:\25-03-2022\20220324-SAMPLE BROTH-POS-00.d	2990	scanId=1697718		28.2952	358.246	1310.95	2	714.477	42	3679.41	K.ISVLKR.Q	ISVLKR	WP_012292409.1 MULTISPECIES: DUF5808 domain-containing protein [Lysinibacillus]	94	99	1	714.475	0.00129897	1.81807	1	10	0.1	180.88	0.0491602	1.04916	TRUE	FALSE	404	343	84.5154
F:\25-03-2022\20220324-SAMPLE BROTH-POS-00.d	1805	scanId=993314		16.5551	672.83	388.069	2	1343.65	30	2457.58	K.EGLNALAEEAAEK.A	EGLNALAEEAAEK	DECOY_WP_012293722.1 MULTISPECIES: TldD/PmbA family protein [Lysinibacillus]	229	241	0	1343.66	-0.0114581	-8.52753	1	24	0.0416667	120.668	0.0491001	1.0491	FALSE	TRUE	404	344	84.5525
F:\25-03-2022\20220324-SAMPLE BROTH-POS-00.d	3072	scanId=1746414		29.1068	593.781	656.761	2	1185.55	40	2438.33	R.DIM(oxidation of M)TEIFSSK.V	DIMTEIFSSK	WP_012292528.1 MULTISPECIES: serine hydrolase [Lysinibacillus]	122	131	0	1185.56	-0.010833	-9.13742	1	18	0.0555556	119.234	0.0488996	1.0489	TRUE	FALSE	405	344	84.5525
F:\25-03-2022\20220324-SAMPLE BROTH-POS-00.d	1009	scanId=537731		8.96205	229.659	968.288	2	457.304	51	5541.52	K.ALVR.Y	ALVR	DECOY_WP_217581292.1 MULTISPECIES: NUDIX domain-containing protein [Lysinibacillus]	6	9	0	457.301	0.00235665	5.15339	1	6	0.166667	268.84	0.0485137	1.04851	FALSE	TRUE	405	345	84.5894
F:\25-03-2022\20220324-SAMPLE BROTH-POS-00.d	2306	scanId=1288250		21.4707	443.727	430.801	2	885.44	37	2772.4	K.DVQYFSK.K	DVQYFSK	WP_206701069.1 MULTISPECIES: methyl-accepting chemotaxis protein [Lysinibacillus]	50	56	0	885.423	0.0164869	18.6204	1	12	0.0833333	134.42	0.0484851	1.04849	TRUE	FALSE	406	345	84.5894
F:\25-03-2022\20220324-SAMPLE BROTH-POS-00.d	4014	scanId=2304621		38.4102	645.847	672.415	2	1289.68	43	2678.86	R.LSAQQRFQGQK.Q	LSAQQRFQGQK	DECOY_WP_227256803.1 MULTISPECIES: sigma-70 family RNA polymerase sigma factor [Lysinibacillus]	121	131	1	1289.68	-0.00377257	-2.92519	1	20	0.05	129.686	0.048411	1.04841	FALSE	TRUE	406	346	84.6262
F:\25-03-2022\20220324-SAMPLE BROTH-POS-00.d	3170	scanId=1804536		30.0755	772.903	451.107	2	1543.79	32	2085.09	R.SIRKTIEENPETK.M	SIRKTIEENPETK	WP_031417479.1 MULTISPECIES: energy-coupling factor ABC transporter permease [Lysinibacillus]	54	66	2	1543.82	-0.0292426	-18.9417	1	24	0.0416667	100.485	0.0481921	1.04819	TRUE	FALSE	407	346	84.6262
F:\25-03-2022\20220324-SAMPLE BROTH-POS-00.d	4317	scanId=2478642		41.3106	487.791	680.741	2	973.568	47	3293.78	M.KTEEARLK.K	KTEEARLK	DECOY_WP_012293962.1 MULTISPECIES: PepSY domain-containing protein [Lysinibacillus]	2	9	2	973.556	0.0121859	12.5169	1	14	0.0714286	158.001	0.0479696	1.04797	FALSE	TRUE	407	347	84.8707
F:\25-03-2022\20220324-SAMPLE BROTH-POS-00.d	3787	scanId=2168582		36.1429	643.86	447.235	2	1285.71	23	1521.96	R.VELRSGVGWKR.K	VELRSGVGWKR	DECOY_WP_012293036.1 MULTISPECIES: RNA degradosome polyphosphate kinase [Lysinibacillus]	429	439	2	1285.73	-0.0200617	-15.6034	1	20	0.05	72.9141	0.047908	1.04791	FALSE	TRUE	407	348	84.9067
F:\25-03-2022\20220324-SAMPLE BROTH-POS-00.d	2388	scanId=1336237		22.2705	475.248	745.074	2	948.481	33	2274.18	K.TMKDIDVK.G	TMKDIDVK	WP_012292245.1 MULTISPECIES: phosphoglycerate kinase [Lysinibacillus]	6	13	1	948.495	-0.0143763	-15.157	1	14	0.0714286	108.643	0.0477723	1.04777	TRUE	FALSE	408	348	84.9067
F:\25-03-2022\20220324-SAMPLE BROTH-POS-00.d	1596	scanId=871484		14.5246	460.254	1039.12	2	918.494	34	3022.5	M.KAEKNAMK.T	KAEKNAMK	DECOY_WP_031419385.1 MULTISPECIES: AMP-binding protein [Lysinibacillus]	2	9	2	918.496	-0.00197931	-2.15494	1	14	0.0714286	144.322	0.0477491	1.04775	FALSE	TRUE	408	349	85.1507
F:\25-03-2022\20220324-SAMPLE BROTH-POS-00.d	2668	scanId=1505733		25.0954	601.812	853.596	2	1201.61	44	3214.28	K.AVEERELNSR.I	AVEERELNSR	DECOY_WP_036225924.1 MULTISPECIES: preprotein translocase subunit SecA [Lysinibacillus]	50	59	1	1201.61	0.00392206	3.26402	1	18	0.0555556	152.601	0.0474758	1.04748	FALSE	TRUE	408	350	85.3947
F:\25-03-2022\20220324-SAMPLE BROTH-POS-00.d	2343	scanId=1310087		21.8346	616.318	992.657	2	1230.62	44	3499.04	R.AAAGNVC[carbamidomethylation of C]IVGSGR.E	AAAGNVCIVGSGR	DECOY_WP_031417997.1 MULTISPECIES: aspartate 1-decarboxylase [Lysinibacillus]	53	65	0	1230.61	0.00802132	6.51815	1	24	0.0416667	166.003	0.0474425	1.04744	FALSE	TRUE	408	351	85.6387
F:\25-03-2022\20220324-SAMPLE BROTH-POS-00.d	2649	scanId=1494047		24.9006	868.943	334.457	2	1735.87	25	1535.68	K.WLEEAIHPAMPALMK.V	WLEEAIHPAMPALMK	DECOY_WP_107922374.1 MULTISPECIES: leucine--tRNA ligase [Lysinibacillus]	89	103	0	1735.88	-0.00664037	-3.82536	1	28	0.0357143	72.7972	0.0474038	1.0474	FALSE	TRUE	408	352	85.7001
F:\25-03-2022\20220324-SAMPLE BROTH-POS-00.d	2340	scanId=1308370		21.806	632.316	1111.26	2	1262.62	48	2765.23	K.ANVTQTNMEKK.-	ANVTQTNMEKK	DECOY_WP_012295531.1 MULTISPECIES: thiazolylpeptide-type bacteriocin [Lysinibacillus]	47	57	1	1262.63	-0.0111632	-8.84124	1	20	0.05	131.045	0.0473904	1.04739	FALSE	TRUE	408	353	85.7001
F:\25-03-2022\20220324-SAMPLE BROTH-POS-00.d	3335	scanId=1902667		31.711	729.839	1413.48	2	1457.66	56	3781.87	K.IEPGYSIEYTMR.D	IEPGYSIEYTMR	DECOY_WP_217581243.1 MULTISPECIES: DUF3888 domain-containing protein [Lysinibacillus]	18	29	0	1457.69	-0.0234008	-16.0534	1	22	0.0454545	178.166	0.0471104	1.04711	FALSE	TRUE	408	354	85.7001
F:\25-03-2022\20220324-SAMPLE BROTH-POS-00.d	3363	scanId=1919289		31.988	508.246	828.828	2	1014.48	54	4215.02	R.FYRADTSR.T	FYRADTSR	WP_036160583.1 MULTISPECIES: HAMP domain-containing histidine kinase [Lysinibacillus]	407	414	1	1014.49	-0.0106714	-10.519	1	14	0.0714286	198.385	0.0470663	1.04707	TRUE	FALSE	409	354	85.7001
F:\25-03-2022\20220324-SAMPLE BROTH-POS-00.d	3292	scanId=1877732		31.2954	655.845	587.183	2	1309.68	43	3382.75	K.TMNFTLILDDK.K	TMNFTLILDDK	WP_227256876.1 MULTISPECIES: KR domain-containing protein [Lysinibacillus]	1079	1089	0	1309.66	0.0169666	12.955	1	20	0.05	159.056	0.0470196	1.04702	TRUE	FALSE	410	354	85.7001
F:\25-03-2022\20220324-SAMPLE BROTH-POS-00.d	2528	scanId=1422622		23.7102	579.298	334.557	2	1156.58	31	1899.45	R.LAEFQAEGHR.D	LAEFQAEGHR	DECOY_WP_089985579.1 MULTISPECIES: isochorismate synthase [Lysinibacillus]	301	310	0	1156.56	0.0186174	16.0972	1	18	0.0555556	89.175	0.0469479	1.04695	FALSE	TRUE	410	355	85.7001
F:\25-03-2022\20220324-SAMPLE BROTH-POS-00.d	4338	scanId=2492048		41.534	621.855	617.231	2	1241.69	35	2340.92	R.MKVDIAVLPEK.L	MKVDIAVLPEK	WP_012295243.1 MULTISPECIES: DNA primase [Lysinibacillus]	339	349	1	1241.71	-0.0107767	-8.67897	1	20	0.05	109.762	0.0468885	1.04689	TRUE	FALSE	411	355	85.7001
F:\25-03-2022\20220324-SAMPLE BROTH-POS-00.d	2805	scanId=1587297		26.4548	581.81	801.828	2	1161.6	31	2606.91	K.M(oxidation of M)LSPMDLIVK.L	MLSPMDLIVK	WP_031418479.1 MULTISPECIES: heterodisulfide reductase-related iron-sulfur binding cluster [Lysinibacillus]	302	311	0	1161.61	-0.00914071	-7.86897	1	18	0.0555556	122.202	0.0468762	1.04688	TRUE	FALSE	412	355	85.7001
F:\25-03-2022\20220324-SAMPLE BROTH-POS-00.d	3190	scanId=1816171		30.2694	520.275	648.014	2	1038.54	47	3487.16	R.HPTMGIQQK.F	HPTMGIQQK	DECOY_WP_012292487.1 MULTISPECIES: response regulator transcription factor [Lysinibacillus]	7	15	0	1038.53	0.00759719	7.31534	1	16	0.0625	162.985	0.0467385	1.04674	FALSE	TRUE	412	356	85.7001
F:\25-03-2022\20220324-SAMPLE BROTH-POS-00.d	2739	scanId=1549229		25.8204	434.259	1067.41	2	866.503	34	2382.74	K.TVINHKR.Y	TVINHKR	WP_010858198.1 MULTISPECIES: DUF2187 family protein [Lysinibacillus]	47	53	1	866.509	-0.00524681	-6.05511	1	12	0.0833333	110.875	0.0465326	1.04653	TRUE	FALSE	413	356	85.7001
F:\25-03-2022\20220324-SAMPLE BROTH-POS-00.d	2717	scanId=1535543		25.5922	410.233	885.877	2	818.452	32	2160.12	K.NPLHPNK.E	NPLHPNK	DECOY_WP_089933581.1 MULTISPECIES: arginine--tRNA ligase [Lysinibacillus]	158	164	0	818.44	0.0123286	15.0636	1	12	0.0833333	100.38	0.0464698	1.04647	FALSE	TRUE	413	357	85.7001
F:\25-03-2022\20220324-SAMPLE BROTH-POS-00.d	3609	scanId=2063248		34.3873	924.47	1060.09	2	1846.93	53	3153.56	K.QVGSVEVPQEAFM(oxidation of M)AVLK.M	QVGSVEVPQEAFMAVLK	WP_031419709.1 MULTISPECIES: translation elongation factor 4 [Lysinibacillus]	587	603	0	1846.95	-0.0242528	-13.1313	1	32	0.03125	146.12	0.046335	1.04634	TRUE	FALSE	414	357	85.7001
F:\25-03-2022\20220324-SAMPLE BROTH-POS-00.d	2062	scanId=1143063		19.0509	613.307	413.465	2	1224.6	24	1333.13	-.M(oxidation of M)WRYHAFAK.N	MWRYHAFAK	DECOY_WP_155593039.1 MULTISPECIES: 30S ribosomal protein S7 [Lysinibacillus]	1	9	1	1224.59	0.0139704	11.4082	1	16	0.0625	61.4066	0.0460619	1.04606	FALSE	TRUE	414	358	85.7001
F:\25-03-2022\20220324-SAMPLE BROTH-POS-00.d	2412	scanId=1351698		22.5282	601.327	805.737	2	1200.64	37	3024.79	K.IVTLTAQANDR.L	IVTLTAQANDR	WP_012293828.1 MULTISPECIES: MarR family transcriptional regulator [Lysinibacillus]	86	96	0	1200.65	-0.00649862	-5.4126	1	20	0.05	138.951	0.0459373	1.04594	TRUE	FALSE	415	358	85.7001
F:\25-03-2022\20220324-SAMPLE BROTH-POS-00.d	1092	scanId=584202		9.73657	504.747	380.564	2	1007.48	45	3007.89	R.ELSSSQTEK.E	ELSSSQTEK	DECOY_WP_012293385.1 MULTISPECIES: recombinase family protein [Lysinibacillus]	197	205	0	1007.48	0.00332022	3.29558	1	16	0.0625	137.935	0.0458577	1.04586	FALSE	TRUE	415	359	85.7001
F:\25-03-2022\20220324-SAMPLE BROTH-POS-00.d	2364	scanId=1322053		22.0341	500.271	971.07	2	998.528	45	3994.82	R.QAIMPQRR.I	QAIMPQRR	WP_012295396.1 MULTISPECIES: magnesium/cobalt transporter CorA [Lysinibacillus]	195	202	1	998.544	-0.0162091	-16.2327	1	14	0.0714286	181.936	0.045543	1.04554	TRUE	FALSE	416	359	85.7001
F:\25-03-2022\20220324-SAMPLE BROTH-POS-00.d	4190	scanId=2405251		40.0874	988.486	773.587	2	1974.96	51	3270.84	K.QM(oxidation of M)AGTDEWETLVKPAKR.V	QMAGTDEWETLVKPAKR	WP_068983754.1 MULTISPECIES: tRNA preQ1(34) S-adenosylmethionine ribosyltransferase-isomerase QueA [Lysinibacillus]	86	102	1	1974.98	-0.025291	-12.8057	1	32	0.03125	148.51	0.0454044	1.0454	TRUE	FALSE	417	359	85.7001
F:\25-03-2022\20220324-SAMPLE BROTH-POS-00.d	4490	scanId=2577974		42.9661	730.409	646.184	2	1458.8	46	3440.34	R.RWKEFAIAVDPK.L	RWKEFAIAVDPK	DECOY_WP_012296085.1 MULTISPECIES: NYN domain-containing protein [Lysinibacillus]	6	17	2	1458.8	0.00596849	4.09138	1	22	0.0454545	155.345	0.0451539	1.04515	FALSE	TRUE	417	360	85.9388
F:\25-03-2022\20220324-SAMPLE BROTH-POS-00.d	2071	scanId=1147995		19.1331	344.228	1439.31	2	686.442	45	3773.46	K.VLKEAK.A	VLKEAK	DECOY_WP_036161492.1 MULTISPECIES: Ger(x)C family spore germination protein [Lysinibacillus]	56	61	1	686.433	0.0092683	13.5021	1	10	0.1	170	0.0450514	1.04505	FALSE	TRUE	417	361	86.0038
F:\25-03-2022\20220324-SAMPLE BROTH-POS-00.d	3036	scanId=1725194		28.7531	497.28	808.947	2	992.546	31	2181.18	R.LEIEKYAK.H	LEIEKYAK	DECOY_WP_206701044.1 MULTISPECIES: enoyl-CoA hydratase/isomerase family protein [Lysinibacillus]	44	51	1	992.554	-0.00806531	-8.12581	1	14	0.0714286	98.1822	0.0450133	1.04501	FALSE	TRUE	417	362	86.0038
F:\25-03-2022\20220324-SAMPLE BROTH-POS-00.d	2779	scanId=1571893		26.1981	516.278	608.11	2	1030.54	39	2471.66	R.SNLLGDEKR.G	SNLLGDEKR	WP_031418406.1 MULTISPECIES: acyl-CoA dehydrogenase [Lysinibacillus]	223	231	1	1030.54	0.000587547	0.570135	1	16	0.0625	111.118	0.0449566	1.04496	TRUE	FALSE	418	362	86.0038
F:\25-03-2022\20220324-SAMPLE BROTH-POS-00.d	4050	scanId=2325457		38.7575	646.351	1142.46	2	1290.69	55	3460.22	M.SDVLKQFVMPK.K	SDVLKQFVMPK	WP_012295678.1 MULTISPECIES: iron-containing alcohol dehydrogenase [Lysinibacillus]	2	12	1	1290.7	-0.0135053	-10.4635	1	20	0.05	155.241	0.0448644	1.04486	TRUE	FALSE	419	362	86.0038
F:\25-03-2022\20220324-SAMPLE BROTH-POS-00.d	3226	scanId=1837171		30.6194	906.921	538.251	2	1811.83	31	1739.7	K.KHM(oxidation of M)NSYEIWFEANK.I	KHMNSYEIWFEANK	DECOY_WP_012291911.1 MULTISPECIES: alanine:cation symporter family protein [Lysinibacillus]	4	17	1	1811.83	-0.00172255	-0.950724	1	26	0.0384615	77.5647	0.0445852	1.04459	FALSE	TRUE	419	363	86.036
F:\25-03-2022\20220324-SAMPLE BROTH-POS-00.d	4256	scanId=2444554		40.7424	474.29	2184.18	2	946.566	62	5351.5	K.VFVKRNGK.T	VFVKRNGK	WP_036161990.1 MULTISPECIES: non-ribosomal peptide synthetase [Lysinibacillus]	1403	1410	2	946.571	-0.00496798	-5.24839	1	14	0.0714286	238.163	0.0445039	1.0445	TRUE	FALSE	420	363	86.036
F:\25-03-2022\20220324-SAMPLE BROTH-POS-00.d	2655	scanId=1497480		24.9579	622.335	762.037	2	1242.66	25	2141.61	K.NVQKAYEHVR.I	NVQKAYEHVR	DECOY_WP_068983117.1 MULTISPECIES: translation initiation factor IF-2 [Lysinibacillus]	747	756	1	1242.65	0.00908361	7.30989	1	18	0.0555556	94.8036	0.0442674	1.04427	FALSE	TRUE	420	364	86.273
F:\25-03-2022\20220324-SAMPLE BROTH-POS-00.d	3416	scanId=1950256		32.5041	738.381	769.942	2	1474.75	46	2746.86	K.TADAASRIREEEK.E	TADAASRIREEEK	DECOY_WP_231595752.1 MULTISPECIES: methyl-accepting chemotaxis protein [Lysinibacillus]	243	255	2	1474.74	0.0105093	7.12623	1	24	0.0416667	120.96	0.0440358	1.04404	FALSE	TRUE	420	365	86.51
F:\25-03-2022\20220324-SAMPLE BROTH-POS-00.d	2170	scanId=1205899		20.0982	596.825	432.102	2	1191.64	27	1769.06	K.VEESLVIFEK.-	VEESLVIFEK	DECOY_WP_012295426.1 MULTISPECIES: pseudouridine-5'-phosphate glycosidase [Lysinibacillus]	295	304	0	1191.64	-0.00237483	-1.99291	1	18	0.0555556	77.8846	0.044026	1.04403	FALSE	TRUE	420	366	86.541
F:\25-03-2022\20220324-SAMPLE BROTH-POS-00.d	2715	scanId=1534159		25.5692	450.271	924.375	2	898.527	37	2985.36	K.GEIKVPEK.V	GEIKVPEK	WP_012293320.1 MULTISPECIES: BMP family protein [Lysinibacillus]	350	357	1	898.512	0.0147317	16.3957	1	14	0.0714286	131.086	0.0439097	1.04391	TRUE	FALSE	421	366	86.541
F:\25-03-2022\20220324-SAMPLE BROTH-POS-00.d	3188	scanId=1815506		30.2583	511.752	918.178	2	1021.49	37	2912.89	K.HAAYYIER.I	HAAYYIER	DECOY_WP_082011579.1 MULTISPECIES: reverse transcriptase domain-containing protein [Lysinibacillus]	366	373	0	1021.5	-0.0089397	-8.75156	1	14	0.0714286	126.905	0.0435669	1.04357	FALSE	TRUE	421	367	86.7209
F:\25-03-2022\20220324-SAMPLE BROTH-POS-00.d	1133	scanId=608150		10.1357	816.452	451.893	2	1630.89	23	1639.46	R.LDEKALEEGFLIVR.M	LDEKALEEGFLIVR	DECOY_WP_036161681.1 MULTISPECIES: Ger(x)C family spore germination protein [Lysinibacillus]	270	283	1	1630.89	-0.00453367	-2.77987	1	26	0.0384615	70.7289	0.0431416	1.04314	FALSE	TRUE	421	368	86.7209
F:\25-03-2022\20220324-SAMPLE BROTH-POS-00.d	1859	scanId=1024514		17.0751	721.352	392.381	2	1440.69	30	1436.17	K.EDHEPIDKVMTK.N	EDHEPIDKVMTK	WP_126657341.1 MULTISPECIES: DRTGG domain-containing protein [Lysinibacillus]	247	258	1	1440.69	-0.00204044	-1.41629	1	22	0.0454545	61.9013	0.0431017	1.0431	TRUE	FALSE	422	368	86.7209
F:\25-03-2022\20220324-SAMPLE BROTH-POS-00.d	2981	scanId=1692401		28.2066	756.413	392.914	2	1510.81	37	2712.88	K.YFEEVVKKWQR.N	YFEEVVKKWQR	DECOY_WP_016994084.1 MULTISPECIES: type I DNA topoisomerase [Lysinibacillus]	142	152	2	1510.79	0.0174747	11.5666	1	20	0.05	116.364	0.0428931	1.04289	FALSE	TRUE	422	369	86.7209
F:\25-03-2022\20220324-SAMPLE BROTH-POS-00.d	4241	scanId=2435943		40.5989	404.204	1555.21	2	806.394	42	5217.25	M.ADLTMTR.L	ADLTMTR	WP_031419310.1 MULTISPECIES: cytochrome c biogenesis protein CcsA [Lysinibacillus]	2	8	0	806.396	-0.00185193	-2.29656	1	12	0.0833333	222.881	0.04272	1.04272	TRUE	FALSE	423	369	86.7209
F:\25-03-2022\20220324-SAMPLE BROTH-POS-00.d	3293	scanId=1878065		31.301	609.311	578.136	2	1216.61	34	1915.27	R.RPEVEDGM(oxidation of M)LR.E	RPEVEDGMLR	DECOY_WP_012291832.1 MULTISPECIES: DNA topoisomerase (ATP-hydrolyzing) subunit B [Lysinibacillus]	17	26	0	1216.59	0.0207331	17.042	1	18	0.0555556	81.4453	0.0425242	1.04252	FALSE	TRUE	423	370	86.7209
F:\25-03-2022\20220324-SAMPLE BROTH-POS-00.d	2769	scanId=1566410		26.1067	597.288	495	2	1192.56	39	2248.92	R.NKETDQPAYK.Y	NKETDQPAYK	DECOY_WP_012295519.1 MULTISPECIES: accessory gene regulator AgrB [Lysinibacillus]	61	70	1	1192.57	-0.0118157	-9.9077	1	18	0.0555556	95.5953	0.0425072	1.04251	FALSE	TRUE	423	371	86.7209
F:\25-03-2022\20220324-SAMPLE BROTH-POS-00.d	3321	scanId=1894685		31.578	858.929	805.095	2	1715.84	64	3854.24	K.GSYHAHMELAKKMVD.-	GSYHAHMELAKKMVD	DECOY_WP_036161253.1 MULTISPECIES: malate dehydrogenase [Lysinibacillus]	386	400	2	1715.81	0.030312	17.6663	1	28	0.0357143	163.688	0.0424695	1.04247	FALSE	TRUE	423	372	86.7209
F:\25-03-2022\20220324-SAMPLE BROTH-POS-00.d	3114	scanId=1771181		29.5195	582.284	624.837	2	1162.55	34	2224.93	K.RFEGNEVGQK.L	RFEGNEVGQK	DECOY_WP_036161706.1 MULTISPECIES: TetR/AcrR family transcriptional regulator [Lysinibacillus]	46	55	1	1162.57	-0.0197016	-16.9466	1	18	0.0555556	94.2841	0.0423761	1.04238	FALSE	TRUE	423	373	86.7209
F:\25-03-2022\20220324-SAMPLE BROTH-POS-00.d	2503	scanId=1407384		23.4563	801.927	457.347	2	1601.84	35	2153.55	R.IDSNGIGM(oxidation of M)YTIFKK.S	IDSNGIGMYTIFKK	DECOY_WP_012294019.1 MULTISPECIES: FtsX-like permease family protein [Lysinibacillus]	316	329	1	1601.81	0.0279638	17.4576	1	26	0.0384615	90.9897	0.042251	1.04225	FALSE	TRUE	423	374	86.7209
F:\25-03-2022\20220324-SAMPLE BROTH-POS-00.d	4009	scanId=2301353		38.3558	401.724	1426.12	2	801.434	53	4357.69	K.HYTILR.E	HYTILR	WP_012293973.1 MULTISPECIES: iron ABC transporter permease [Lysinibacillus]	52	57	0	801.45	-0.0158752	-19.8081	1	10	0.1	184.114	0.0422504	1.04225	TRUE	FALSE	424	374	86.7209
F:\25-03-2022\20220324-SAMPLE BROTH-POS-00.d	2470	scanId=1386943		23.1156	538.76	701.149	2	1075.5	44	3092.78	K.ETATAEPTTR.I	ETATAEPTTR	WP_227256956.1 MULTISPECIES: hypothetical protein [Lysinibacillus]	35	44	0	1075.51	-0.00964334	-8.96625	1	18	0.0555556	130.488	0.0421912	1.04219	TRUE	FALSE	425	374	86.7209
F:\25-03-2022\20220324-SAMPLE BROTH-POS-00.d	1818	scanId=1000244		16.6706	419.236	433.824	2	836.458	39	3017.79	R.VFMATLR.K	VFMATLR	WP_012295223.1 MULTISPECIES: response regulator transcription factor [Lysinibacillus]	198	204	0	836.458	2.51879e-05	0.0301126	1	12	0.0833333	126.603	0.0419524	1.04195	TRUE	FALSE	426	374	86.7209
F:\25-03-2022\20220324-SAMPLE BROTH-POS-00.d	1669	scanId=913731		15.2287	401.742	468.089	2	801.469	38	2711.27	K.DTLAKVR.D	DTLAKVR	DECOY_WP_012292760.1 MULTISPECIES: serine hydroxymethyltransferase [Lysinibacillus]	8	14	1	801.471	-0.00232182	-2.89695	1	12	0.0833333	113.29	0.041785	1.04178	FALSE	TRUE	426	375	86.7209
F:\25-03-2022\20220324-SAMPLE BROTH-POS-00.d	2774	scanId=1568792		26.1464	422.237	658.694	2	842.458	32	2659.25	R.MHKNVSK.E	MHKNVSK	WP_012293992.1 MULTISPECIES: ABC transporter ATP-binding protein [Lysinibacillus]	105	111	1	842.443	0.0152246	18.072	1	12	0.0833333	111.088	0.0417742	1.04177	TRUE	FALSE	427	375	86.7209
F:\25-03-2022\20220324-SAMPLE BROTH-POS-00.d	3317	scanId=1892636		31.5438	1076.97	497.377	2	2151.93	46	2527.01	R.GWVTC[carbamidomethylation of C]FIFDTDIEGHNNK.F	GWVTCFIFDTDIEGHNNK	DECOY_WP_036160744.1 MULTISPECIES: single-stranded DNA-binding protein [Lysinibacillus]	80	97	0	2151.97	-0.036817	-17.1085	1	34	0.0294118	105.004	0.0415525	1.04155	FALSE	TRUE	427	376	86.7209
F:\25-03-2022\20220324-SAMPLE BROTH-POS-00.d	2796	scanId=1581645		26.3606	625.328	487.408	2	1248.64	30	1773.59	K.ETLPHHFLQK.L	ETLPHHFLQK	DECOY_WP_012292738.1 MULTISPECIES: fructose-6-phosphate aldolase [Lysinibacillus]	18	27	0	1248.66	-0.020777	-16.6394	1	18	0.0555556	73.1408	0.0412389	1.04124	FALSE	TRUE	427	377	86.7209
F:\25-03-2022\20220324-SAMPLE BROTH-POS-00.d	4352	scanId=2500082		41.6679	1106.06	1048.21	2	2210.11	43	3349.79	K.VLDEEKM(oxidation of M)TVRFNSEWLAK.L	VLDEEKMTVRFNSEWLAK	WP_089986115.1 MULTISPECIES: tyrosine--tRNA ligase [Lysinibacillus]	116	133	2	2210.1	0.000861704	0.389893	1	34	0.0294118	137.911	0.0411701	1.04117	TRUE	FALSE	428	377	86.7209
F:\25-03-2022\20220324-SAMPLE BROTH-POS-00.d	2493	scanId=1401233		23.3538	573.286	409.996	2	1144.56	32	1963.78	R.QRFHEC[carbamidomethylation of C]LR.R	QRFHECLR	WP_233433797.1 MULTISPECIES: class A beta-lactamase-related serine hydrolase [Lysinibacillus]	184	191	1	1144.56	0.00166127	1.45145	1	14	0.0714286	80.7371	0.041113	1.04111	TRUE	FALSE	429	377	86.7209
F:\25-03-2022\20220324-SAMPLE BROTH-POS-00.d	2509	scanId=1410986		23.5163	618.319	335.131	2	1234.62	28	1642.13	-.M(oxidation of M)LSRNKISDR.L	MLSRNKISDR	DECOY_WP_036161575.1 MULTISPECIES: diadenosine tetraphosphate hydrolase [Lysinibacillus]	1	10	2	1234.65	-0.0211567	-17.1358	1	18	0.0555556	67.2481	0.0409517	1.04095	FALSE	TRUE	429	378	86.7209
F:\25-03-2022\20220324-SAMPLE BROTH-POS-00.d	3326	scanId=1897568		31.626	599.809	496.405	2	1197.6	46	2671.87	R.EGAIIYTEFR.A	EGAIIYTEFR	DECOY_WP_031417997.1 MULTISPECIES: aspartate 1-decarboxylase [Lysinibacillus]	66	75	0	1197.6	0.00101245	0.845399	1	18	0.0555556	109.153	0.0408527	1.04085	FALSE	TRUE	429	379	86.7209
F:\25-03-2022\20220324-SAMPLE BROTH-POS-00.d	2919	scanId=1654558		27.5758	740.847	722.892	2	1479.68	56	3309.5	K.AVNEMLKEEDM(oxidation of M)R.L	AVNEMLKEEDMR	DECOY_WP_012293795.1 MULTISPECIES: ABC transporter permease [Lysinibacillus]	402	413	1	1479.67	0.0101086	6.83167	1	22	0.0454545	134.752	0.0407167	1.04072	FALSE	TRUE	429	380	86.7209
F:\25-03-2022\20220324-SAMPLE BROTH-POS-00.d	1735	scanId=951861		15.8642	322.693	672.667	2	643.371	32	2534.03	R.GALLDR.V	GALLDR	DECOY_WP_233732807.1 MULTISPECIES: TRIC cation channel family protein [Lysinibacillus]	69	74	0	643.365	0.00518753	8.06312	1	10	0.1	103.111	0.0406907	1.04069	FALSE	TRUE	429	381	86.7209
F:\25-03-2022\20220324-SAMPLE BROTH-POS-00.d	2106	scanId=1169434		19.4904	447.232	1432.33	2	892.449	55	3866.16	K.QDFAWVK.E	QDFAWVK	DECOY_WP_217580955.1 MULTISPECIES: DNA topoisomerase III [Lysinibacillus]	111	117	0	892.444	0.00515535	5.77667	1	12	0.0833333	157.042	0.0406195	1.04062	FALSE	TRUE	429	382	86.7209
F:\25-03-2022\20220324-SAMPLE BROTH-POS-00.d	1716	scanId=940829		15.6804	352.693	717.546	2	703.372	43	3234.92	R.SIDIEK.T	SIDIEK	DECOY_WP_036161702.1 MULTISPECIES: MBL fold metallo-hydrolase [Lysinibacillus]	66	71	0	703.375	-0.0034621	-4.92212	1	10	0.1	131.168	0.0405475	1.04055	FALSE	TRUE	429	383	86.7209
F:\25-03-2022\20220324-SAMPLE BROTH-POS-00.d	1681	scanId=920549		15.3423	562.276	527.592	2	1122.54	27	1640.06	R.HHIETTEEK.I	HHIETTEEK	WP_012293906.1 MULTISPECIES: mannonate oxidoreductase [Lysinibacillus]	155	163	0	1122.53	0.00789467	7.03292	1	16	0.0625	66.4808	0.0405356	1.04054	TRUE	FALSE	430	383	86.7209
F:\25-03-2022\20220324-SAMPLE BROTH-POS-00.d	4296	scanId=2467010		41.1167	887.951	448.844	2	1773.89	37	2240.82	R.M(oxidation of M)RVALTGLTMAEYFR.D	MRVALTGLTMAEYFR	WP_012292768.1 MULTISPECIES: F0F1 ATP synthase subunit beta [Lysinibacillus]	224	238	1	1773.89	-0.00255659	-1.44123	1	28	0.0357143	90.1053	0.0402109	1.04021	TRUE	FALSE	431	383	86.7209
F:\25-03-2022\20220324-SAMPLE BROTH-POS-00.d	2083	scanId=1154863		19.2476	670.814	555.701	2	1339.61	33	1899.81	R.LADGTYEGLDMR.Y	LADGTYEGLDMR	WP_012295137.1 MULTISPECIES: pentapeptide repeat-containing protein [Lysinibacillus]	225	236	0	1339.61	0.00475003	3.54584	1	22	0.0454545	76.2849	0.040154	1.04015	TRUE	FALSE	432	383	86.7209
F:\25-03-2022\20220324-SAMPLE BROTH-POS-00.d	4042	scanId=2320471		38.6744	645.849	1511.95	2	1289.68	61	4184.63	K.QRTLSNFIQIA.-	QRTLSNFIQIA	DECOY_WP_126658149.1 MULTISPECIES: cysteine--tRNA ligase [Lysinibacillus]	457	467	1	1289.71	-0.0257242	-19.9457	1	20	0.05	167.895	0.0401219	1.04012	FALSE	TRUE	432	384	86.7209
F:\25-03-2022\20220324-SAMPLE BROTH-POS-00.d	4159	scanId=2386581		39.7762	775.851	434.53	2	1549.69	24	1461.69	M.EYVHVYPDTDNAK.K	EYVHVYPDTDNAK	DECOY_WP_031416797.1 MULTISPECIES: CamS family sex pheromone protein [Lysinibacillus]	2	14	0	1549.7	-0.0178723	-11.5327	1	24	0.0416667	58.4076	0.0399589	1.03996	FALSE	TRUE	432	385	86.7209
F:\25-03-2022\20220324-SAMPLE BROTH-POS-00.d	2255	scanId=1257546		20.959	684.844	437.432	2	1367.67	27	2106.2	R.DGIYEESLDISK.R	DGIYEESLDISK	WP_012294116.1 MULTISPECIES: right-handed parallel beta-helix repeat-containing protein [Lysinibacillus]	34	45	0	1367.65	0.0270943	19.8109	1	22	0.0454545	84.0015	0.039883	1.03988	TRUE	FALSE	433	385	86.7209
F:\25-03-2022\20220324-SAMPLE BROTH-POS-00.d	2866	scanId=1624693		27.0781	708.334	784.373	2	1414.65	46	3179.03	R.STGAGHAGMGLMLGR.S	STGAGHAGMGLMLGR	DECOY_WP_012295613.1 MULTISPECIES: LrgB family protein [Lysinibacillus]	47	61	0	1414.68	-0.0280697	-19.8417	1	28	0.0357143	126.095	0.0396645	1.03966	FALSE	TRUE	433	386	86.7209
F:\25-03-2022\20220324-SAMPLE BROTH-POS-00.d	4260	scanId=2446603		40.7766	401.724	4104.35	2	801.433	79	6597.81	K.ASLENIR.N	ASLENIR	DECOY_WP_012293388.1 MULTISPECIES: DUF896 domain-containing protein [Lysinibacillus]	64	70	0	801.434	-0.00165893	-2.06995	1	12	0.0833333	260.646	0.0395048	1.0395	FALSE	TRUE	433	387	86.7209
F:\25-03-2022\20220324-SAMPLE BROTH-POS-00.d	4268	scanId=2450702		40.8449	989.026	904.068	2	1976.04	50	3462.99	R.AAETLEMGIFLGRGRVEK.I	AAETLEMGIFLGRGRVEK	DECOY_WP_012292397.1 MULTISPECIES: ornithine--oxo-acid transaminase [Lysinibacillus]	50	67	2	1976.05	-0.0142923	-7.23275	1	34	0.0294118	135.993	0.0392705	1.03927	FALSE	TRUE	433	388	86.7209
F:\25-03-2022\20220324-SAMPLE BROTH-POS-00.d	3748	scanId=2144760		35.7459	408.726	915.048	2	815.438	41	3171.89	K.REIGWR.I	REIGWR	DECOY_WP_012294069.1 MULTISPECIES: GNAT family N-acetyltransferase [Lysinibacillus]	112	117	1	815.44	-0.00190625	-2.3377	1	10	0.1	124.51	0.0392543	1.03925	FALSE	TRUE	433	389	86.7209
F:\25-03-2022\20220324-SAMPLE BROTH-POS-00.d	1908	scanId=1052946		17.549	392.226	373.845	2	782.437	30	2530.7	K.KEHLEK.M	KEHLEK	WP_012292331.1 MULTISPECIES: cysteine desulfurase [Lysinibacillus]	238	243	1	782.429	0.00840718	10.745	1	10	0.1	99.1483	0.0391782	1.03918	TRUE	FALSE	434	389	86.7209
F:\25-03-2022\20220324-SAMPLE BROTH-POS-00.d	3628	scanId=2074170		34.5694	757.893	509.619	2	1513.77	29	1873.73	K.HDQVIYLETQLR.K	HDQVIYLETQLR	WP_206701011.1 MULTISPECIES: LytTR family transcriptional regulator [Lysinibacillus]	116	127	0	1513.79	-0.0168415	-11.1254	1	22	0.0454545	73.391	0.0391684	1.03917	TRUE	FALSE	435	389	86.7209
F:\25-03-2022\20220324-SAMPLE BROTH-POS-00.d	3092	scanId=1757880		29.2979	609.803	456.726	2	1217.59	35	2237.46	K.LTEEDWRNR.E	LTEEDWRNR	WP_012292082.1 MULTISPECIES: polyphosphate kinase [Lysinibacillus]	178	186	1	1217.58	0.0117305	9.63429	1	16	0.0625	86.9121	0.0388442	1.03884	TRUE	FALSE	436	389	86.7209
F:\25-03-2022\20220324-SAMPLE BROTH-POS-00.d	2785	scanId=1575662		26.2609	670.322	1046.03	2	1338.63	39	2532.14	K.QPGM(oxidation of M)HTWELPK.Y	QPGMHTWELPK	WP_012292525.1 MULTISPECIES: HAMP domain-containing histidine kinase [Lysinibacillus]	114	124	0	1338.64	-0.00892372	-6.66627	1	20	0.05	98.1635	0.0387669	1.03877	TRUE	FALSE	437	389	86.7209
F:\25-03-2022\20220324-SAMPLE BROTH-POS-00.d	1564	scanId=852801		14.2132	464.732	320.243	2	927.45	29	2457.72	R.AEMSTVYK.S	AEMSTVYK	DECOY_WP_031416504.1 MULTISPECIES: late competence development ComFB family protein [Lysinibacillus]	42	49	0	927.437	0.0130506	14.0717	1	14	0.0714286	95.2552	0.0387576	1.03876	FALSE	TRUE	437	390	86.7209
F:\25-03-2022\20220324-SAMPLE BROTH-POS-00.d	2079	scanId=1152812		19.2134	522.256	1134.09	2	1042.5	38	2323.59	R.IMEQHTER.L	IMEQHTER	WP_048393118.1 MULTISPECIES: sigma-70 family RNA polymerase sigma factor [Lysinibacillus]	10	17	0	1042.49	0.0100233	9.6148	1	14	0.0714286	89.7705	0.0386344	1.03863	TRUE	FALSE	438	390	86.7209
F:\25-03-2022\20220324-SAMPLE BROTH-POS-00.d	3213	scanId=1829085		30.4846	634.318	501.08	2	1266.62	36	2672.83	K.FEKTAGISGDDK.N	FEKTAGISGDDK	WP_012292448.1 MULTISPECIES: GMC family oxidoreductase [Lysinibacillus]	153	164	1	1266.61	0.0117999	9.31613	1	22	0.0454545	103.111	0.0385775	1.03858	TRUE	FALSE	439	390	86.7209
F:\25-03-2022\20220324-SAMPLE BROTH-POS-00.d	1936	scanId=1070402		17.8399	617.302	467.752	2	1232.59	39	2608.82	K.LWRYM(oxidation of M)TYGK.K	LWRYMTYGK	WP_012293434.1 MULTISPECIES: DUF418 domain-containing protein [Lysinibacillus]	334	342	1	1232.6	-0.0117079	-9.49852	1	16	0.0625	100.526	0.0385332	1.03853	TRUE	FALSE	440	390	86.7209
F:\25-03-2022\20220324-SAMPLE BROTH-POS-00.d	3746	scanId=2143377		35.7228	500.294	513.907	2	998.572	33	2048.41	R.DIRGLQLGK.L	DIRGLQLGK	WP_206700916.1 MULTISPECIES: ribosome biogenesis GTPase YlqF [Lysinibacillus]	257	265	1	998.587	-0.0147872	-14.8082	1	16	0.0625	78.5571	0.0383502	1.03835	TRUE	FALSE	441	390	86.7209
F:\25-03-2022\20220324-SAMPLE BROTH-POS-00.d	1636	scanId=894165		14.9026	293.703	665.04	2	585.392	28	2607.28	K.LNVLK.S	LNVLK	DECOY_WP_051563306.1 MULTISPECIES: copper amine oxidase N-terminal domain-containing protein [Lysinibacillus]	115	119	0	585.385	0.007203	12.3047	1	8	0.125	99.7348	0.0382525	1.03825	FALSE	TRUE	441	391	86.7209
F:\25-03-2022\20220324-SAMPLE BROTH-POS-00.d	3959	scanId=2271483		37.8579	798.431	414.538	2	1594.85	40	2546.1	R.HKAADAVVQPFDGIK.K	HKAADAVVQPFDGIK	DECOY_WP_036222531.1 MULTISPECIES: arginine--tRNA ligase [Lysinibacillus]	66	80	1	1594.85	-0.000166914	-0.104658	1	28	0.0357143	97.369	0.0382423	1.03824	FALSE	TRUE	441	392	86.7209
F:\25-03-2022\20220324-SAMPLE BROTH-POS-00.d	1584	scanId=864334		14.4054	401.717	723.002	2	801.42	38	3247.74	K.VPESDKK.N	VPESDKK	WP_012291782.1 MULTISPECIES: site-specific integrase [Lysinibacillus]	644	650	1	801.423	-0.00293291	-3.65962	1	12	0.0833333	124.185	0.0382374	1.03824	TRUE	FALSE	442	392	86.7209
F:\25-03-2022\20220324-SAMPLE BROTH-POS-00.d	2260	scanId=1260428		21.007	404.711	505.05	2	807.408	29	2252.71	R.KGDVMMK.N	KGDVMMK	DECOY_WP_155593039.1 MULTISPECIES: 30S ribosomal protein S7 [Lysinibacillus]	123	129	1	807.398	0.00960138	11.8918	1	12	0.0833333	86.0336	0.0381911	1.03819	FALSE	TRUE	442	393	86.7209
F:\25-03-2022\20220324-SAMPLE BROTH-POS-00.d	2207	scanId=1228673		20.4778	469.245	904.691	2	936.475	46	3212.93	K.LETSFNVK.A	LETSFNVK	DECOY_WP_012292989.1 MULTISPECIES: class II fructose-bisphosphate aldolase [Lysinibacillus]	47	54	0	936.492	-0.0169627	-18.113	1	14	0.0714286	122.117	0.0380081	1.03801	FALSE	TRUE	442	394	86.7209
F:\25-03-2022\20220324-SAMPLE BROTH-POS-00.d	2548	scanId=1434089		23.9014	708.854	516.851	2	1415.69	50	3221.23	K.VIGTC[carbamidomethylation of C]GYLNYEK.E	VIGTCGYLNYEK	WP_217581244.1 MULTISPECIES: GNAT family N-acetyltransferase [Lysinibacillus]	84	95	0	1415.68	0.0178877	12.6354	1	22	0.0454545	121.959	0.0378611	1.03786	TRUE	FALSE	443	394	86.7209
F:\25-03-2022\20220324-SAMPLE BROTH-POS-00.d	1439	scanId=780792		13.0131	577.294	361.473	2	1152.57	38	3012.3	K.M(oxidation of M)LQVM(oxidation of M)KDTR.N	MLQVMKDTR	DECOY_WP_036160485.1 MULTISPECIES: AAA family ATPase [Lysinibacillus]	44	52	1	1152.56	0.0103161	8.95056	1	16	0.0625	114.019	0.037851	1.03785	FALSE	TRUE	443	395	86.7209
F:\25-03-2022\20220324-SAMPLE BROTH-POS-00.d	3440	scanId=1965162		32.7526	987.472	345.536	2	1972.93	28	1315.82	K.SSTNILDSAQAINHIM(oxidation of M)DK.L	SSTNILDSAQAINHIMDK	DECOY_WP_012293809.1 MULTISPECIES: methyl-accepting chemotaxis protein [Lysinibacillus]	294	311	0	1972.95	-0.0220129	-11.1574	1	34	0.0294118	49.5873	0.0376855	1.03769	FALSE	TRUE	443	396	86.7209
F:\25-03-2022\20220324-SAMPLE BROTH-POS-00.d	3087	scanId=1755498		29.2582	582.288	1947.01	2	1162.56	50	3566.94	K.RM(oxidation of M)ATGVDQNR.V	RMATGVDQNR	WP_012296093.1 MULTISPECIES: DNA repair protein RadA [Lysinibacillus]	324	333	1	1162.55	0.00950388	8.17502	1	18	0.0555556	134.405	0.0376807	1.03768	TRUE	FALSE	444	396	86.7209
F:\25-03-2022\20220324-SAMPLE BROTH-POS-00.d	4165	scanId=2390733		39.8454	479.247	1010.45	2	956.478	32	3179.25	K.HIGQVM(oxidation of M)TR.E	HIGQVMTR	WP_031415820.1 MULTISPECIES: response regulator YycF [Lysinibacillus]	174	181	0	956.486	-0.00769749	-8.04767	1	14	0.0714286	119.314	0.037529	1.03753	TRUE	FALSE	445	396	86.7209
F:\25-03-2022\20220324-SAMPLE BROTH-POS-00.d	3994	scanId=2292654		38.2108	508.768	812.002	2	1015.52	30	2892.09	-.M(oxidation of M)YRKQFK.N	MYRKQFK	DECOY_WP_012295178.1 MULTISPECIES: phosphate ABC transporter permease PstA [Lysinibacillus]	1	7	2	1015.53	-0.00496855	-4.89259	1	12	0.0833333	108.241	0.0374265	1.03743	FALSE	TRUE	445	397	86.7209
F:\25-03-2022\20220324-SAMPLE BROTH-POS-00.d	3800	scanId=2176284		36.2713	745.394	459.101	2	1488.77	34	2389.27	R.LFIEM(oxidation of M)PPGDILTK.L	LFIEMPPGDILTK	WP_099805090.1 MULTISPECIES: malonate decarboxylase subunit epsilon [Lysinibacillus]	265	277	0	1488.79	-0.015716	-10.5562	1	24	0.0416667	89.1136	0.0372975	1.0373	TRUE	FALSE	446	397	86.7209
F:\25-03-2022\20220324-SAMPLE BROTH-POS-00.d	2968	scanId=1684313		28.0718	578.817	635.255	2	1155.62	36	2417.9	R.VSVGIM(oxidation of M)YMIK.L	VSVGIMYMIK	WP_031416725.1 MULTISPECIES: DNA-directed RNA polymerase subunit beta [Lysinibacillus]	1032	1041	0	1155.6	0.0162969	14.1025	1	18	0.0555556	89.7285	0.0371101	1.03711	TRUE	FALSE	447	397	86.7209
F:\25-03-2022\20220324-SAMPLE BROTH-POS-00.d	3657	scanId=2091121		34.8519	316.183	1494.16	2	630.351	60	5807.92	K.NSIAAR.E	NSIAAR	DECOY_WP_012292929.1 MULTISPECIES: S41 family peptidase [Lysinibacillus]	297	302	0	630.345	0.00597466	9.4784	1	10	0.1	214.857	0.0369938	1.03699	FALSE	TRUE	447	398	86.7209
F:\25-03-2022\20220324-SAMPLE BROTH-POS-00.d	2373	scanId=1327152		22.1191	405.725	795.934	2	809.436	33	2158.1	K.LAQHVSR.K	LAQHVSR	WP_012295609.1 MULTISPECIES: DNA polymerase I [Lysinibacillus]	442	448	0	809.451	-0.0152152	-18.7969	1	12	0.0833333	79.8272	0.0369895	1.03699	TRUE	FALSE	448	398	86.7209
F:\25-03-2022\20220324-SAMPLE BROTH-POS-00.d	3396	scanId=1939560		32.3259	879.468	752.817	2	1756.92	49	2791.52	R.HM(oxidation of M)EKLVQLYDPVNR.L	HMEKLVQLYDPVNR	DECOY_WP_012293618.1 MULTISPECIES: demethylmenaquinone methyltransferase [Lysinibacillus]	98	111	1	1756.89	0.0279615	15.9153	1	26	0.0384615	103.25	0.0369871	1.03699	FALSE	TRUE	448	399	86.7209
F:\25-03-2022\20220324-SAMPLE BROTH-POS-00.d	4432	scanId=2545212		42.4201	567.299	811.864	2	1132.58	48	3162.97	K.FVKHGFQDR.L	FVKHGFQDR	DECOY_WP_089985609.1 MULTISPECIES: TIGR01212 family radical SAM protein [Lysinibacillus]	289	297	1	1132.58	0.00610378	5.38928	1	16	0.0625	116.439	0.0368132	1.03681	FALSE	TRUE	448	400	86.7209
F:\25-03-2022\20220324-SAMPLE BROTH-POS-00.d	3498	scanId=1999080		33.3179	679.367	346.385	2	1356.72	48	2790.93	K.LASESIDVTLPGR.A	LASESIDVTLPGR	WP_012295579.1 MULTISPECIES: phenylalanine--tRNA ligase subunit alpha [Lysinibacillus]	88	100	0	1356.72	-0.00445852	-3.28624	1	24	0.0416667	102.494	0.0367239	1.03672	TRUE	FALSE	449	400	86.7209
F:\25-03-2022\20220324-SAMPLE BROTH-POS-00.d	3448	scanId=1969761		32.8292	691.347	444.678	2	1380.68	23	1364.16	R.LSALAFFAAGEER.Y	LSALAFFAAGEER	WP_024363689.1 MULTISPECIES: isochorismate synthase [Lysinibacillus]	32	44	0	1380.7	-0.0245355	-17.7703	1	24	0.0416667	50.0388	0.036681	1.03668	TRUE	FALSE	450	400	86.7209
F:\25-03-2022\20220324-SAMPLE BROTH-POS-00.d	3761	scanId=2152680		35.8779	588.321	751.319	2	1174.63	35	3502.2	K.GDLNLLEFVR.L	GDLNLLEFVR	DECOY_WP_012295277.1 MULTISPECIES: phage tail protein I [Lysinibacillus]	113	122	0	1174.63	-0.00751404	-6.39692	1	18	0.0555556	128.283	0.0366292	1.03663	FALSE	TRUE	450	401	86.7209
F:\25-03-2022\20220324-SAMPLE BROTH-POS-00.d	2745	scanId=1552830		25.8804	568.306	483.092	2	1134.6	37	1834.94	K.LEQRGTLYR.E	LEQRGTLYR	DECOY_WP_079563115.1 MULTISPECIES: ribosome biogenesis GTP-binding protein YihA/YsxC [Lysinibacillus]	89	97	1	1134.61	-0.0178614	-15.7422	1	16	0.0625	67.1667	0.0366042	1.0366	FALSE	TRUE	450	402	86.7209
F:\25-03-2022\20220324-SAMPLE BROTH-POS-00.d	4449	scanId=2555761		42.5959	460.287	1473.99	2	918.559	55	4083.96	K.TLVAQFKL.-	TLVAQFKL	WP_012293809.1 MULTISPECIES: methyl-accepting chemotaxis protein [Lysinibacillus]	575	582	1	918.554	0.00516397	5.62185	1	14	0.0714286	149.124	0.0365145	1.03651	TRUE	FALSE	451	402	86.7209
F:\25-03-2022\20220324-SAMPLE BROTH-POS-00.d	3248	scanId=1851629		30.8604	530.782	723.285	2	1059.55	44	2642.3	R.LSTNDIIER.M	LSTNDIIER	WP_206701061.1 MULTISPECIES: DNA polymerase III subunit gamma/tau [Lysinibacillus]	186	194	0	1059.56	-0.00742746	-7.00997	1	16	0.0625	96.2737	0.0364356	1.03644	TRUE	FALSE	452	402	86.7209
F:\25-03-2022\20220324-SAMPLE BROTH-POS-00.d	3029	scanId=1720707		28.6783	622.833	738.779	2	1243.65	69	4239.42	R.LSYDTYLTLR.-	LSYDTYLTLR	DECOY_WP_012295891.1 MULTISPECIES: Rrf2 family transcriptional regulator [Lysinibacillus]	136	145	0	1243.64	0.00575198	4.6251	1	18	0.0555556	154.446	0.036431	1.03643	FALSE	TRUE	452	403	86.7209
F:\25-03-2022\20220324-SAMPLE BROTH-POS-00.d	1257	scanId=677231		11.2871	643.301	591.119	2	1284.59	39	2670.76	-.M(oxidation of M)EYSDQVKNR.V	MEYSDQVKNR	WP_010857552.1 MULTISPECIES: metal-sensitive transcriptional regulator [Lysinibacillus]	1	10	1	1284.58	0.0105183	8.18815	1	18	0.0555556	97.2545	0.0364146	1.03641	TRUE	FALSE	453	403	86.7209
F:\25-03-2022\20220324-SAMPLE BROTH-POS-00.d	3191	scanId=1816504		30.2749	888.945	368.349	2	1775.88	42	2577.43	M.IGNNGDVEIYAAYIHK.L	IGNNGDVEIYAAYIHK	DECOY_WP_031417090.1 MULTISPECIES: YolD-like family protein [Lysinibacillus]	2	17	0	1775.88	-0.00864487	-4.86792	1	30	0.0333333	93.7686	0.0363807	1.03638	FALSE	TRUE	453	404	86.7209
F:\25-03-2022\20220324-SAMPLE BROTH-POS-00.d	3107	scanId=1766914		29.4484	641.322	474.118	2	1280.63	46	3069.07	R.VSYNLPLNM(oxidation of M)SK.Q	VSYNLPLNMSK	DECOY_WP_031417025.1 MULTISPECIES: HD domain-containing protein [Lysinibacillus]	215	225	0	1280.64	-0.014932	-11.6598	1	20	0.05	111.392	0.0362952	1.0363	FALSE	TRUE	453	405	86.7209
F:\25-03-2022\20220324-SAMPLE BROTH-POS-00.d	3349	scanId=1911254		31.8541	967.517	596.68	2	1933.02	43	2607.02	R.M(oxidation of M)GEQIGFAKVLEFRHR.L	MGEQIGFAKVLEFRHR	DECOY_WP_217581167.1 MULTISPECIES: methyltransferase domain-containing protein [Lysinibacillus]	229	244	2	1933	0.0192912	9.97995	1	30	0.0333333	94.3201	0.0361793	1.03618	FALSE	TRUE	453	406	86.7209
F:\25-03-2022\20220324-SAMPLE BROTH-POS-00.d	65	scanId=37376		0.6228	393.217	334.009	2	784.42	24	1514.37	K.DIPALEK.K	DIPALEK	WP_012293901.1 MULTISPECIES: ABC transporter permease [Lysinibacillus]	75	81	0	784.433	-0.0135085	-17.2207	1	12	0.0833333	54.7297	0.0361402	1.03614	TRUE	FALSE	454	406	86.7209
F:\25-03-2022\20220324-SAMPLE BROTH-POS-00.d	2433	scanId=1364720		22.7452	424.24	658.003	2	846.464	29	1835.58	R.QALNVFR.M	QALNVFR	WP_031418434.1 MULTISPECIES: tryptophan synthase subunit beta [Lysinibacillus]	145	151	0	846.471	-0.00671189	-7.92926	1	12	0.0833333	66.0015	0.0359567	1.03596	TRUE	FALSE	455	406	86.7209
F:\25-03-2022\20220324-SAMPLE BROTH-POS-00.d	2024	scanId=1122001		18.6999	382.691	706.576	2	763.367	52	4044.01	K.YLEDPK.G	YLEDPK	WP_031418785.1 MULTISPECIES: glycine betaine ABC transporter substrate-binding protein [Lysinibacillus]	209	214	0	763.375	-0.00838673	-10.9864	1	10	0.1	145.292	0.0359276	1.03593	TRUE	FALSE	456	406	86.7209
F:\25-03-2022\20220324-SAMPLE BROTH-POS-00.d	1339	scanId=724189		12.0697	385.728	572.334	2	769.442	34	3501.96	R.EKPALGR.L	EKPALGR	DECOY_WP_012295807.1 MULTISPECIES: succinate CoA transferase [Lysinibacillus]	63	69	0	769.445	-0.00235531	-3.06106	1	12	0.0833333	125.488	0.0358338	1.03583	FALSE	TRUE	456	407	86.7209
F:\25-03-2022\20220324-SAMPLE BROTH-POS-00.d	3103	scanId=1764145		29.4023	617.811	582.433	2	1233.61	37	2266.84	K.EFLGEGVGEAAR.Q	EFLGEGVGEAAR	WP_012292028.1 MULTISPECIES: Asp-tRNA(Asn)/Glu-tRNA(Gln) amidotransferase subunit GatA [Lysinibacillus]	264	275	0	1233.6	0.00853875	6.92182	1	22	0.0454545	81.0536	0.0357562	1.03576	TRUE	FALSE	457	407	86.7209
F:\25-03-2022\20220324-SAMPLE BROTH-POS-00.d	2823	scanId=1598435		26.6405	622.294	606.016	2	1242.57	30	2282.23	-.M(oxidation of M)SAM(oxidation of M)M(oxidation of M)DIRIK.D	MSAMMDIRIK	DECOY_WP_031417414.1 MULTISPECIES: sporulation transcription factor Spo0A [Lysinibacillus]	1	10	1	1242.58	-0.00417198	-3.35752	1	18	0.0555556	81.391	0.035663	1.03566	FALSE	TRUE	457	408	86.7209
F:\25-03-2022\20220324-SAMPLE BROTH-POS-00.d	3076	scanId=1748631		29.1437	601.805	533.836	2	1201.6	37	2702.61	K.EITSATIQPDK.S	EITSATIQPDK	WP_036160354.1 MULTISPECIES: ATP-dependent zinc metalloprotease FtsH [Lysinibacillus]	48	58	0	1201.62	-0.0234448	-19.511	1	20	0.05	96.2442	0.0356115	1.03561	TRUE	FALSE	458	408	86.7209
F:\25-03-2022\20220324-SAMPLE BROTH-POS-00.d	3404	scanId=1943607		32.3933	547.759	539.013	2	1093.5	47	3537.5	-.MDSVHKYSK.G	MDSVHKYSK	WP_008179143.1 MULTISPECIES: DUF2639 domain-containing protein [Lysinibacillus]	1	9	1	1093.52	-0.0183694	-16.7984	1	16	0.0625	125.917	0.0355949	1.03559	TRUE	FALSE	459	408	86.7209
F:\25-03-2022\20220324-SAMPLE BROTH-POS-00.d	4342	scanId=2494265		41.571	474.288	983.916	2	946.562	52	4218.2	R.LVTEKMVK.A	LVTEKMVK	WP_058844806.1 MULTISPECIES: alanine dehydrogenase [Lysinibacillus]	248	255	1	946.552	0.00953502	10.0734	1	14	0.0714286	148.57	0.0352211	1.03522	TRUE	FALSE	460	408	86.7209
F:\25-03-2022\20220324-SAMPLE BROTH-POS-00.d	2958	scanId=1678329		27.972	794.878	402.625	2	1587.74	30	2480.84	K.DWPKGGKPNDIM(oxidation of M)SK.E	DWPKGGKPNDIMSK	WP_012295880.1 MULTISPECIES: c-type cytochrome [Lysinibacillus]	283	296	1	1587.77	-0.0296062	-18.6464	1	26	0.0384615	87.2717	0.0351784	1.03518	TRUE	FALSE	461	408	86.7209
F:\25-03-2022\20220324-SAMPLE BROTH-POS-00.d	2905	scanId=1647076		27.4511	584.339	1171.72	2	1166.66	54	3859.49	K.NAPKKPSNRR.S	NAPKKPSNRR	WP_171821110.1 MULTISPECIES: DNA translocase FtsK [Lysinibacillus]	192	201	2	1166.66	0.000126413	0.108355	1	18	0.0555556	135.242	0.0350413	1.03504	TRUE	FALSE	462	408	86.7209
F:\25-03-2022\20220324-SAMPLE BROTH-POS-00.d	4451	scanId=2556427		42.607	545.287	932.126	2	1088.56	42	3241.57	K.NELM(oxidation of M)IQIGR.Y	NELMIQIGR	WP_082011579.1 MULTISPECIES: reverse transcriptase domain-containing protein [Lysinibacillus]	318	326	0	1088.56	-0.00530993	-4.87792	1	16	0.0625	113.368	0.0349732	1.03497	TRUE	FALSE	463	408	86.7209
F:\25-03-2022\20220324-SAMPLE BROTH-POS-00.d	3088	scanId=1755831		29.2637	327.177	1227.96	2	652.34	44	4523.86	R.TLEYK.T	TLEYK	WP_012292623.1 MULTISPECIES: saccharopine dehydrogenase NADP-binding domain-containing protein [Lysinibacillus]	235	239	0	652.343	-0.00298823	-4.58077	1	8	0.125	157.398	0.0347928	1.03479	TRUE	FALSE	464	408	86.7209
F:\25-03-2022\20220324-SAMPLE BROTH-POS-00.d	4062	scanId=2331605		38.8599	371.196	1433.16	2	740.378	53	3843.08	R.EVAASHK.E	EVAASHK	WP_036161427.1 MULTISPECIES: N-acetylmuramoyl-L-alanine amidase [Lysinibacillus]	207	213	0	740.382	-0.00352088	-4.7555	1	12	0.0833333	132.843	0.0345669	1.03457	TRUE	FALSE	465	408	86.7209
F:\25-03-2022\20220324-SAMPLE BROTH-POS-00.d	2561	scanId=1441405		24.0233	635.307	513.63	2	1268.6	27	1917.34	K.VSAFLDMNSGTK.L	VSAFLDMNSGTK	DECOY_WP_012296155.1 MULTISPECIES: malate:quinone oxidoreductase [Lysinibacillus]	156	167	0	1268.61	-0.00729148	-5.74763	1	22	0.0454545	66.0083	0.034427	1.03443	FALSE	TRUE	465	409	86.7209
F:\25-03-2022\20220324-SAMPLE BROTH-POS-00.d	3231	scanId=1840440		30.6739	637.316	590.84	2	1272.62	43	2985.25	R.EVNSADFRAHK.H	EVNSADFRAHK	DECOY_WP_012295375.1 MULTISPECIES: nicotinate-nucleotide adenylyltransferase [Lysinibacillus]	143	153	1	1272.62	-0.00334374	-2.62745	1	20	0.05	102.703	0.0344037	1.0344	FALSE	TRUE	465	410	86.7209
F:\25-03-2022\20220324-SAMPLE BROTH-POS-00.d	2357	scanId=1318120		21.9685	680.854	383.062	2	1359.69	40	2543.36	K.AGQTIAFVGPSGAGK.T	AGQTIAFVGPSGAGK	WP_036162023.1 MULTISPECIES: ABC transporter ATP-binding protein/permease [Lysinibacillus]	358	372	0	1359.71	-0.0215678	-15.862	1	28	0.0357143	87.3992	0.0343637	1.03436	TRUE	FALSE	466	410	86.7209
F:\25-03-2022\20220324-SAMPLE BROTH-POS-00.d	1442	scanId=782509		13.0417	576.789	527.895	2	1151.56	46	3639.44	K.EFIQPFTDR.M	EFIQPFTDR	DECOY_WP_031417804.1 MULTISPECIES: ATP phosphoribosyltransferase regulatory subunit [Lysinibacillus]	370	378	0	1151.56	0.00167866	1.45773	1	16	0.0625	124.367	0.0341721	1.03417	FALSE	TRUE	466	411	86.7209
F:\25-03-2022\20220324-SAMPLE BROTH-POS-00.d	2795	scanId=1581313		26.3551	545.778	758.56	2	1089.54	32	1880.63	-.M(oxidation of M)RELQQNR.N	MRELQQNR	WP_206700873.1 MULTISPECIES: hypothetical protein [Lysinibacillus]	1	8	1	1089.53	0.00612397	5.62072	1	14	0.0714286	64.2192	0.0341476	1.03415	TRUE	FALSE	467	411	86.7209
F:\25-03-2022\20220324-SAMPLE BROTH-POS-00.d	4480	scanId=2572324		42.8719	523.273	1532.21	2	1044.53	49	4010.58	K.NLLADEQSR.K	NLLADEQSR	WP_053596370.1 MULTISPECIES: FkbM family methyltransferase [Lysinibacillus]	132	140	0	1044.52	0.0115717	11.0785	1	16	0.0625	136.945	0.0341459	1.03415	TRUE	FALSE	468	411	86.7209
F:\25-03-2022\20220324-SAMPLE BROTH-POS-00.d	3043	scanId=1728960		28.8159	407.227	1105.65	2	812.44	29	2757.49	R.TVDTHIK.T	TVDTHIK	WP_031417817.1 MULTISPECIES: response regulator transcription factor [Lysinibacillus]	193	199	0	812.439	0.0011683	1.43801	1	12	0.0833333	94.089	0.0341212	1.03412	TRUE	FALSE	469	411	86.7209
F:\25-03-2022\20220324-SAMPLE BROTH-POS-00.d	4085	scanId=2345061		39.0842	971.506	842.245	2	1941	61	3739.18	R.HYGAMSKAMLRISTGYR.I	HYGAMSKAMLRISTGYR	WP_012292785.1 MULTISPECIES: flagellin [Lysinibacillus]	19	35	2	1940.97	0.0261512	13.4732	1	32	0.03125	127.095	0.03399	1.03399	TRUE	FALSE	470	411	86.7209
F:\25-03-2022\20220324-SAMPLE BROTH-POS-00.d	4303	scanId=2470391		41.1731	584.803	737.182	2	1167.59	27	1974.55	K.KFDEKYPNK.D	KFDEKYPNK	WP_227256903.1 MULTISPECIES: YhcN/YlaJ family sporulation lipoprotein [Lysinibacillus]	84	92	2	1167.59	-0.00186422	-1.59663	1	16	0.0625	67.0893	0.0339769	1.03398	TRUE	FALSE	471	411	86.7209
F:\25-03-2022\20220324-SAMPLE BROTH-POS-00.d	3856	scanId=2209755		36.8291	1266.16	458.096	2	2530.3	49	2372.85	K.FRDEVDNLQIDLEKIEDGVQR.M	FRDEVDNLQIDLEKIEDGVQR	DECOY_WP_089987420.1 MULTISPECIES: serine--tRNA ligase [Lysinibacillus]	331	351	2	2530.27	0.0291044	11.5025	1	40	0.025	80.4602	0.0339086	1.03391	FALSE	TRUE	471	412	86.7209
F:\25-03-2022\20220324-SAMPLE BROTH-POS-00.d	2771	scanId=1567075		26.1178	440.247	561.307	2	878.479	42	3952	K.QIISKYQ.-	QIISKYQ	DECOY_WP_036161702.1 MULTISPECIES: MBL fold metallo-hydrolase [Lysinibacillus]	334	340	1	878.486	-0.0071512	-8.14036	1	12	0.0833333	133.565	0.0337969	1.0338	FALSE	TRUE	471	413	86.7209
F:\25-03-2022\20220324-SAMPLE BROTH-POS-00.d	2042	scanId=1131096		18.8515	447.234	472.064	2	892.454	38	2340.16	K.AIDFYHK.Q	AIDFYHK	WP_031417906.1 MULTISPECIES: YdcF family protein [Lysinibacillus]	189	195	0	892.444	0.010101	11.3184	1	12	0.0833333	79.04	0.0337755	1.03378	TRUE	FALSE	472	413	86.7209
F:\25-03-2022\20220324-SAMPLE BROTH-POS-00.d	3546	scanId=2025690		33.7614	1148.05	394.006	2	2294.09	38	2174.03	K.ADTEYELWAGRNPIVTAGFGK.K	ADTEYELWAGRNPIVTAGFGK	DECOY_WP_031416725.1 MULTISPECIES: DNA-directed RNA polymerase subunit beta [Lysinibacillus]	1014	1034	1	2294.13	-0.0450346	-19.6304	1	40	0.025	73.4083	0.033766	1.03377	FALSE	TRUE	472	414	86.7209
F:\25-03-2022\20220324-SAMPLE BROTH-POS-00.d	3512	scanId=2006510		33.4417	673.384	478.815	2	1344.75	56	3421.53	K.AIIERM(oxidation of M)ERVGR.I	AIIERMERVGR	DECOY_WP_012292593.1 MULTISPECIES: dipeptide epimerase [Lysinibacillus]	115	125	2	1344.73	0.0244587	18.1886	1	20	0.05	114.64	0.0335055	1.03351	FALSE	TRUE	472	415	86.7209
F:\25-03-2022\20220324-SAMPLE BROTH-POS-00.d	4418	scanId=2538399		42.3065	423.737	5047.85	2	845.459	77	7705.84	R.ATGKLSNR.I	ATGKLSNR	WP_036162376.1 MULTISPECIES: methyl-accepting chemotaxis protein [Lysinibacillus]	3	10	1	845.472	-0.0131871	-15.5973	1	14	0.0714286	256.366	0.0332691	1.03327	TRUE	FALSE	473	415	86.7209
F:\25-03-2022\20220324-SAMPLE BROTH-POS-00.d	3589	scanId=2050507		34.175	756.898	637.882	2	1511.78	48	3536.96	K.VTGTHSPFQVPQSK.N	VTGTHSPFQVPQSK	WP_012295257.1 MULTISPECIES: hypothetical protein [Lysinibacillus]	125	138	0	1511.77	0.00907725	6.00437	1	26	0.0384615	117.208	0.0331382	1.03314	TRUE	FALSE	474	415	86.7209
F:\25-03-2022\20220324-SAMPLE BROTH-POS-00.d	4129	scanId=2370621		39.5102	501.264	987.867	2	1000.51	41	3031.56	R.VRDNEQLK.E	VRDNEQLK	DECOY_WP_036160583.1 MULTISPECIES: HAMP domain-containing histidine kinase [Lysinibacillus]	222	229	1	1000.53	-0.0171739	-17.1648	1	14	0.0714286	99.9645	0.0329746	1.03297	FALSE	TRUE	474	416	86.7209
F:\25-03-2022\20220324-SAMPLE BROTH-POS-00.d	5198	scanId=2948452		49.1407	978.934	850.72	2	1955.85	63	4433.18	R.SFSIEM(oxidation of M)DRGDGQDNVDR.V	SFSIEMDRGDGQDNVDR	DECOY_WP_012293721.1 MULTISPECIES: copper amine oxidase N-terminal domain-containing protein [Lysinibacillus]	858	874	1	1955.83	0.025631	13.1049	1	32	0.03125	145.86	0.0329017	1.0329	FALSE	TRUE	474	417	86.7209
F:\25-03-2022\20220324-SAMPLE BROTH-POS-00.d	2143	scanId=1191488		19.858	304.151	1539.35	2	606.287	48	5259.58	K.VGM(oxidation of M)ER.L	VGMER	DECOY_WP_031418489.1 MULTISPECIES: UDP-N-acetylglucosamine 1-carboxyvinyltransferase [Lysinibacillus]	159	163	0	606.28	0.00735532	12.1319	1	8	0.125	172.462	0.0327902	1.03279	FALSE	TRUE	474	418	86.7209
F:\25-03-2022\20220324-SAMPLE BROTH-POS-00.d	2865	scanId=1624360		27.0725	590.804	420.728	2	1179.59	32	2115.33	K.EWYLLPFGR.R	EWYLLPFGR	WP_012291887.1 MULTISPECIES: polysaccharide biosynthesis protein [Lysinibacillus]	519	527	0	1179.61	-0.0149417	-12.6667	1	16	0.0625	69.2308	0.0327281	1.03273	TRUE	FALSE	475	418	86.7209
F:\25-03-2022\20220324-SAMPLE BROTH-POS-00.d	4408	scanId=2532151		42.2024	501.266	858.876	2	1000.52	35	2849.68	M.ALALEQNDK.I	ALALEQNDK	WP_012295386.1 MULTISPECIES: U32 family peptidase [Lysinibacillus]	2	10	0	1000.52	-0.000699883	-0.69952	1	16	0.0625	93.2486	0.0327224	1.03272	TRUE	FALSE	476	418	86.7209
F:\25-03-2022\20220324-SAMPLE BROTH-POS-00.d	4539	scanId=2605342		43.4222	564.823	2174.24	2	1127.63	96	8120.81	R.QAIGRVEKDI.-	QAIGRVEKDI	WP_012295447.1 MULTISPECIES: preprotein translocase subunit YajC [Lysinibacillus]	78	87	2	1127.63	0.00205952	1.82641	1	18	0.0555556	265.166	0.0326527	1.03265	TRUE	FALSE	477	418	86.7209
F:\25-03-2022\20220324-SAMPLE BROTH-POS-00.d	2742	scanId=1550946		25.849	694.853	1065.03	2	1387.69	50	3126.55	K.VGTAVDGEEVDAVK.E	VGTAVDGEEVDAVK	DECOY_WP_053594821.1 MULTISPECIES: chaperonin GroEL [Lysinibacillus]	106	119	0	1387.68	0.0089902	6.47857	1	26	0.0384615	102.033	0.0326344	1.03263	FALSE	TRUE	477	419	86.7209
F:\25-03-2022\20220324-SAMPLE BROTH-POS-00.d	3774	scanId=2161100		36.0182	500.298	708.396	2	998.581	42	2517.17	K.EIVEQIIR.E	EIVEQIIR	DECOY_WP_025114538.1 MULTISPECIES: MarR family transcriptional regulator [Lysinibacillus]	37	44	0	998.576	0.00510099	5.10826	1	14	0.0714286	80.6949	0.0320578	1.03206	FALSE	TRUE	477	420	86.7209
F:\25-03-2022\20220324-SAMPLE BROTH-POS-00.d	3556	scanId=2031121		33.8519	694.392	759.048	2	1386.77	48	2782.05	-.MEKIVLNHIYK.I	MEKIVLNHIYK	WP_012292993.1 MULTISPECIES: sn-glycerol-3-phosphate ABC transporter ATP-binding protein UgpC [Lysinibacillus]	1	11	1	1386.77	0.000838721	0.604802	1	20	0.05	89.1481	0.032044	1.03204	TRUE	FALSE	478	420	86.7209
F:\25-03-2022\20220324-SAMPLE BROTH-POS-00.d	4356	scanId=2502851		41.7141	498.779	889.876	2	995.544	53	4567.73	K.VGVNPGVAQR.M	VGVNPGVAQR	DECOY_WP_031417744.1 MULTISPECIES: deoxyribose-phosphate aldolase [Lysinibacillus]	35	44	0	995.551	-0.00693682	-6.96781	1	18	0.0555556	145.582	0.0318718	1.03187	FALSE	TRUE	478	421	86.7209
F:\25-03-2022\20220324-SAMPLE BROTH-POS-00.d	6609	scanId=3674645		61.2439	1396.3	1390.61	2	2790.58	78	4921.14	K.TYLLAQGKPFKIVTDIGSGIHYNKK.G	TYLLAQGKPFKIVTDIGSGIHYNKK	WP_036161677.1 MULTISPECIES: IS607 family transposase [Lysinibacillus]	85	109	2	2790.54	0.0330729	11.8518	1	48	0.0208333	156.527	0.031807	1.03181	TRUE	FALSE	479	421	86.7209
F:\25-03-2022\20220324-SAMPLE BROTH-POS-00.d	2341	scanId=1308703		21.8116	536.285	582.402	2	1070.56	54	3381.72	K.DKSVLNMHK.M	DKSVLNMHK	WP_036225403.1 MULTISPECIES: nucleoside deaminase [Lysinibacillus]	122	130	1	1070.55	0.00167608	1.56562	1	16	0.0625	107.339	0.031741	1.03174	TRUE	FALSE	480	421	86.7209
F:\25-03-2022\20220324-SAMPLE BROTH-POS-00.d	3352	scanId=1913138		31.8855	482.765	633.974	2	963.516	39	3094.81	K.ARIEQGYK.N	ARIEQGYK	DECOY_WP_012295771.1 MULTISPECIES: MerR family transcriptional regulator [Lysinibacillus]	114	121	1	963.514	0.00254099	2.63721	1	14	0.0714286	98.1636	0.0317187	1.03172	FALSE	TRUE	480	422	86.7209
F:\25-03-2022\20220324-SAMPLE BROTH-POS-00.d	2422	scanId=1358237		22.6371	930.474	331.497	2	1858.93	34	2060.93	K.RDELLFC[carbamidomethylation of C]FGIYTGLR.I	RDELLFCFGIYTGLR	WP_012295301.1 MULTISPECIES: tyrosine-type recombinase/integrase [Lysinibacillus]	26	40	1	1858.94	-0.00676992	-3.64182	1	28	0.0357143	65.3266	0.0316976	1.0317	TRUE	FALSE	481	422	86.7209
F:\25-03-2022\20220324-SAMPLE BROTH-POS-00.d	3110	scanId=1768797		29.4798	593.306	431.25	2	1184.6	38	2401.54	K.YTFANTDLLK.S	YTFANTDLLK	WP_012293351.1 MULTISPECIES: histidinol phosphate phosphatase domain-containing protein [Lysinibacillus]	307	316	0	1184.61	-0.0106688	-9.00617	1	18	0.0555556	76.0357	0.0316612	1.03166	TRUE	FALSE	482	422	86.7209
F:\25-03-2022\20220324-SAMPLE BROTH-POS-00.d	4459	scanId=2560525		42.6753	558.817	1167.02	2	1115.62	55	4563.76	R.QWLWDLKK.Y	QWLWDLKK	DECOY_WP_012293968.1 MULTISPECIES: DUF418 domain-containing protein [Lysinibacillus]	89	96	1	1115.61	0.00733288	6.57296	1	14	0.0714286	143.89	0.0315288	1.03153	FALSE	TRUE	482	423	86.7209
F:\25-03-2022\20220324-SAMPLE BROTH-POS-00.d	3409	scanId=1946322		32.4386	879.967	1644.11	2	1757.92	63	4237.92	K.AINAITAESEDVITALK.G	AINAITAESEDVITALK	DECOY_WP_012295209.1 MULTISPECIES: hydrolase [Lysinibacillus]	147	163	0	1757.94	-0.0216863	-12.3362	1	32	0.03125	133.163	0.0314219	1.03142	FALSE	TRUE	482	424	86.7209
F:\25-03-2022\20220324-SAMPLE BROTH-POS-00.d	4197	scanId=2409186		40.153	757.384	375.832	2	1512.75	34	2168.41	K.VPHFNHKDTYQK.M	VPHFNHKDTYQK	WP_036162077.1 MULTISPECIES: alpha/beta hydrolase [Lysinibacillus]	126	137	1	1512.75	0.00609968	4.03219	1	22	0.0454545	68.006	0.0313621	1.03136	TRUE	FALSE	483	424	86.7209
F:\25-03-2022\20220324-SAMPLE BROTH-POS-00.d	4175	scanId=2395832		39.9304	524.775	752.513	2	1047.54	31	1903.23	K.KREIDEMK.H	KREIDEMK	WP_012293609.1 MULTISPECIES: NAD(P)H-dependent glycerol-3-phosphate dehydrogenase [Lysinibacillus]	330	337	2	1047.54	-0.00262019	-2.50128	1	14	0.0714286	58.8514	0.0309218	1.03092	TRUE	FALSE	484	424	86.7209
F:\25-03-2022\20220324-SAMPLE BROTH-POS-00.d	3947	scanId=2264667		37.7443	810.433	364.449	2	1618.85	26	1404.07	R.QKESRQAQIASM(oxidation of M)AR.T	QKESRQAQIASMAR	DECOY_WP_068983117.1 MULTISPECIES: translation initiation factor IF-2 [Lysinibacillus]	220	233	2	1618.82	0.0306497	18.9334	1	26	0.0384615	43.3554	0.0308785	1.03088	FALSE	TRUE	484	425	86.7209
F:\25-03-2022\20220324-SAMPLE BROTH-POS-00.d	3771	scanId=2159215		35.9868	672.376	549.429	2	1342.74	39	2464.66	K.GEKVVKQEGANGK.K	GEKVVKQEGANGK	WP_036162490.1 MULTISPECIES: peptidoglycan DD-metalloendopeptidase family protein [Lysinibacillus]	307	319	2	1342.72	0.0174771	13.0162	1	24	0.0416667	76.0013	0.0308364	1.03084	TRUE	FALSE	485	425	86.7209
F:\25-03-2022\20220324-SAMPLE BROTH-POS-00.d	2391	scanId=1338122		22.3019	486.276	684.719	2	970.537	35	2077.9	R.ALQKEINR.-	ALQKEINR	WP_012292091.1 MULTISPECIES: YihY/virulence factor BrkB family protein [Lysinibacillus]	298	305	1	970.556	-0.0190859	-19.6649	1	14	0.0714286	63.9728	0.0307872	1.03079	TRUE	FALSE	486	425	86.7209
F:\25-03-2022\20220324-SAMPLE BROTH-POS-00.d	1139	scanId=611751		10.1957	408.734	1098.87	2	815.453	42	2944.16	K.ELRVGDK.I	ELRVGDK	DECOY_WP_206700864.1 MULTISPECIES: serine O-acetyltransferase [Lysinibacillus]	42	48	1	815.45	0.00252578	3.09741	1	12	0.0833333	90.1361	0.0306152	1.03062	FALSE	TRUE	486	426	86.7209
F:\25-03-2022\20220324-SAMPLE BROTH-POS-00.d	1947	scanId=1076667		17.9443	510.272	445.222	2	1018.53	40	3355.71	K.DIKWDSKK.S	DIKWDSKK	WP_053596416.1 MULTISPECIES: stalk domain-containing protein [Lysinibacillus]	88	95	2	1018.54	-0.0148487	-14.5784	1	14	0.0714286	102.696	0.0306034	1.0306	TRUE	FALSE	487	426	86.7209
F:\25-03-2022\20220324-SAMPLE BROTH-POS-00.d	1868	scanId=1029998		17.1665	478.767	686.847	2	955.52	37	2930.94	K.QKYDKFK.Q	QKYDKFK	WP_012295849.1 MULTISPECIES: SAM-dependent methyltransferase [Lysinibacillus]	152	158	2	955.513	0.00705133	7.37963	1	12	0.0833333	89.3315	0.0304788	1.03048	TRUE	FALSE	488	426	86.7209
F:\25-03-2022\20220324-SAMPLE BROTH-POS-00.d	3979	scanId=2283401		38.0566	381.187	1122.93	2	760.36	56	4964.02	K.EVGVSDR.S	EVGVSDR	WP_107922665.1 MULTISPECIES: phBC6A51 family helix-turn-helix protein [Lysinibacillus]	43	49	0	760.372	-0.0114035	-14.9972	1	12	0.0833333	151.05	0.0304289	1.03043	TRUE	FALSE	489	426	86.7209
F:\25-03-2022\20220324-SAMPLE BROTH-POS-00.d	4510	scanId=2589276		43.1545	531.817	1280.88	2	1061.62	53	4022.37	K.YARAIPMLK.Q	YARAIPMLK	DECOY_WP_012293210.1 MULTISPECIES: 23S rRNA (adenine(2503)-C(2))-methyltransferase RlmN [Lysinibacillus]	115	123	1	1061.61	0.0135485	12.7623	1	16	0.0625	121.883	0.0303014	1.0303	FALSE	TRUE	489	427	86.7471
F:\25-03-2022\20220324-SAMPLE BROTH-POS-00.d	2825	scanId=1599819		26.6635	658.389	751.613	2	1314.76	30	2159.47	K.NPIIKSFLANAK.N	NPIIKSFLANAK	WP_080709099.1 MULTISPECIES: sigma-70 family RNA polymerase sigma factor [Lysinibacillus]	23	34	1	1314.77	-0.00209244	-1.59149	1	22	0.0454545	65.1853	0.0301857	1.03019	TRUE	FALSE	490	427	86.7471
F:\25-03-2022\20220324-SAMPLE BROTH-POS-00.d	3331	scanId=1900284		31.6713	715.365	547.48	2	1428.72	27	1742.3	R.EEVNNLQVDLEK.I	EEVNNLQVDLEK	DECOY_WP_103117223.1 MULTISPECIES: serine--tRNA ligase [Lysinibacillus]	333	344	0	1428.71	0.00637318	4.46079	1	22	0.0454545	52.5602	0.0301672	1.03017	FALSE	TRUE	490	428	86.9502
F:\25-03-2022\20220324-SAMPLE BROTH-POS-00.d	2917	scanId=1653893		27.5648	536.794	968.84	2	1071.57	37	2687.07	M.KEANALAEAR.E	KEANALAEAR	DECOY_WP_232735586.1 MULTISPECIES: peptide ABC transporter substrate-binding protein [Lysinibacillus]	2	11	1	1071.57	0.00677747	6.32482	1	18	0.0555556	81.0304	0.0301556	1.03016	FALSE	TRUE	490	429	87.1502
F:\25-03-2022\20220324-SAMPLE BROTH-POS-00.d	4541	scanId=2606008		43.4333	426.249	2235.31	2	850.483	74	7611.55	R.RATVYNK.Q	RATVYNK	DECOY_WP_012293958.1 MULTISPECIES: NlpC/P60 family protein [Lysinibacillus]	6	12	1	850.466	0.0165489	19.4586	1	12	0.0833333	229.328	0.030129	1.03013	FALSE	TRUE	490	430	87.1502
F:\25-03-2022\20220324-SAMPLE BROTH-POS-00.d	1256	scanId=676898		11.2815	432.247	1183.02	2	862.48	36	2826.59	K.VFEVELK.L	VFEVELK	DECOY_WP_031418516.1 MULTISPECIES: 3-hydroxyacyl-ACP dehydratase FabZ [Lysinibacillus]	39	45	0	862.48	-0.000178448	-0.206901	1	12	0.0833333	84.9601	0.0300574	1.03006	FALSE	TRUE	490	431	87.1502
F:\25-03-2022\20220324-SAMPLE BROTH-POS-00.d	2406	scanId=1347543		22.4589	628.777	363.086	2	1255.54	44	3098.7	K.EEENDTHNLR.D	EEENDTHNLR	DECOY_WP_031418539.1 MULTISPECIES: penicillin-binding protein [Lysinibacillus]	321	330	0	1255.54	-0.00323412	-2.57587	1	18	0.0555556	93.0851	0.03004	1.03004	FALSE	TRUE	490	432	87.1502
F:\25-03-2022\20220324-SAMPLE BROTH-POS-00.d	1748	scanId=959947		15.999	570.786	311.831	2	1139.56	20	1964.33	R.LSYQM(oxidation of M)LDVR.Q	LSYQMLDVR	DECOY_WP_036162489.1 MULTISPECIES: cell wall metabolism sensor histidine kinase WalK [Lysinibacillus]	563	571	0	1139.56	-0.00764325	-6.70717	1	16	0.0625	58.6757	0.0298706	1.02987	FALSE	TRUE	490	433	87.1502
F:\25-03-2022\20220324-SAMPLE BROTH-POS-00.d	2476	scanId=1390543		23.1756	445.74	665.543	2	889.465	30	1975.89	K.EVITEATK.R	EVITEATK	DECOY_WP_036162221.1 MULTISPECIES: ATP-dependent RecD-like DNA helicase [Lysinibacillus]	693	700	0	889.476	-0.0105481	-11.8588	1	14	0.0714286	59.0132	0.0298666	1.02987	FALSE	TRUE	490	434	87.1502
F:\25-03-2022\20220324-SAMPLE BROTH-POS-00.d	1701	scanId=931963		15.5326	318.671	1021.11	2	635.328	49	4542.69	R.KNEVF.-	KNEVF	WP_012293250.1 MULTISPECIES: EscU/YscU/HrcU family type III secretion system export apparatus switch protein [Lysinibacillus]	96	100	1	635.328	0.000220368	0.346858	1	8	0.125	135.563	0.029842	1.02984	TRUE	FALSE	491	434	87.1502
F:\25-03-2022\20220324-SAMPLE BROTH-POS-00.d	3242	scanId=1847476		30.7911	416.247	990.152	2	830.479	32	2612.17	K.LLELSEK.E	LLELSEK	DECOY_WP_012293079.1 MULTISPECIES: TetR/AcrR family transcriptional regulator [Lysinibacillus]	42	48	0	830.475	0.0036131	4.35065	1	12	0.0833333	77.893	0.0298193	1.02982	FALSE	TRUE	491	435	87.1502
F:\25-03-2022\20220324-SAMPLE BROTH-POS-00.d	4086	scanId=2345393		39.0898	645.318	1037.92	2	1288.62	66	4410.94	R.TWKDVMAPEGR.Q	TWKDVMAPEGR	DECOY_WP_012293144.1 MULTISPECIES: nucleotidyltransferase [Lysinibacillus]	351	361	1	1288.62	-0.0025974	-2.01564	1	20	0.05	131.363	0.0297812	1.02978	FALSE	TRUE	491	436	87.1502
F:\25-03-2022\20220324-SAMPLE BROTH-POS-00.d	2360	scanId=1319837		21.9972	528.267	660.002	2	1054.52	37	3359.09	R.ATIREM(oxidation of M)YR.L	ATIREMYR	WP_012293452.1 MULTISPECIES: methyltransferase domain-containing protein [Lysinibacillus]	128	135	1	1054.52	-0.00437688	-4.15058	1	14	0.0714286	99.3706	0.0295826	1.02958	TRUE	FALSE	492	436	87.1502
F:\25-03-2022\20220324-SAMPLE BROTH-POS-00.d	4264	scanId=2448653		40.8107	501.757	2023.27	2	1001.5	45	5244.05	-.M(oxidation of M)QNDLPLR.G	MQNDLPLR	WP_012295481.1 MULTISPECIES: uroporphyrinogen-III synthase [Lysinibacillus]	1	8	0	1001.5	0.00360369	3.59831	1	14	0.0714286	154.704	0.0295008	1.0295	TRUE	FALSE	493	436	87.1502
F:\25-03-2022\20220324-SAMPLE BROTH-POS-00.d	12	scanId=8372		0.1394	1099.61	337.901	2	2197.2	17	1018.31	R.ILVNWRTDLITNDGQLKAK.E	ILVNWRTDLITNDGQLKAK	WP_012293467.1 MULTISPECIES: DnaD domain protein [Lysinibacillus]	258	276	2	2197.22	-0.0176531	-8.03429	1	36	0.0277778	30.0197	0.0294799	1.02948	TRUE	FALSE	494	436	87.1502
F:\25-03-2022\20220324-SAMPLE BROTH-POS-00.d	3977	scanId=2282017		38.0335	449.79	640.961	2	897.566	48	4467.66	K.LLVPTSIR.E	LLVPTSIR	DECOY_WP_206701028.1 MULTISPECIES: Ger(x)C family spore germination protein [Lysinibacillus]	173	180	0	897.565	0.00139426	1.55338	1	14	0.0714286	131.469	0.0294268	1.02943	FALSE	TRUE	494	437	87.1502
F:\25-03-2022\20220324-SAMPLE BROTH-POS-00.d	4513	scanId=2590992		43.1831	542.808	3140.07	2	1083.6	90	7429.63	K.QQQAVLLER.V	QQQAVLLER	DECOY_WP_012293605.1 MULTISPECIES: (d)CMP kinase [Lysinibacillus]	109	117	0	1083.6	-0.00255067	-2.35387	1	16	0.0625	218.458	0.0294036	1.0294	FALSE	TRUE	494	438	87.1502
F:\25-03-2022\20220324-SAMPLE BROTH-POS-00.d	3803	scanId=2178168		36.3027	999.986	402.48	2	1997.96	31	1873.21	R.KLSFETSSATENIESSLR.N	KLSFETSSATENIESSLR	WP_012293588.1 MULTISPECIES: methyl-accepting chemotaxis protein [Lysinibacillus]	204	221	1	1997.99	-0.0340137	-17.024	1	34	0.0294118	54.8647	0.0292892	1.02929	TRUE	FALSE	495	438	87.1502
F:\25-03-2022\20220324-SAMPLE BROTH-POS-00.d	4420	scanId=2539064		42.3176	498.784	932.121	2	995.553	53	3113.68	R.VGNIPGVGGAR.I	VGNIPGVGGAR	WP_012293479.1 MULTISPECIES: baseplate J/gp47 family protein [Lysinibacillus]	191	201	0	995.551	0.00170988	1.71752	1	20	0.05	91.125	0.0292661	1.02927	TRUE	FALSE	496	438	87.1502
F:\25-03-2022\20220324-SAMPLE BROTH-POS-00.d	4051	scanId=2325790		38.763	799.395	694.129	2	1596.78	34	2178.34	R.SYIFAGGSGMIMVHK.G	SYIFAGGSGMIMVHK	DECOY_WP_012294189.1 MULTISPECIES: hypothetical protein [Lysinibacillus]	9	23	0	1596.78	-0.00412455	-2.58304	1	28	0.0357143	63.5152	0.0291576	1.02916	FALSE	TRUE	496	439	87.1502
F:\25-03-2022\20220324-SAMPLE BROTH-POS-00.d	4502	scanId=2585177		43.0862	567.298	2465.64	2	1132.58	68	6548.25	-.MGGGLIAMLDR.M	MGGGLIAMLDR	DECOY_WP_012293277.1 MULTISPECIES: flagellar type III secretion system protein FliR [Lysinibacillus]	1	11	0	1132.57	0.00890869	7.86588	1	20	0.05	190.454	0.0290847	1.02908	FALSE	TRUE	496	440	87.1502
F:\25-03-2022\20220324-SAMPLE BROTH-POS-00.d	4137	scanId=2375606		39.5933	570.824	481.764	2	1139.63	23	1349.75	K.SILQQPIWR.Y	SILQQPIWR	WP_012292704.1 MULTISPECIES: lipoate--protein ligase family protein [Lysinibacillus]	3	11	0	1139.65	-0.0116291	-10.2041	1	16	0.0625	39.2112	0.0290507	1.02905	TRUE	FALSE	497	440	87.1502
F:\25-03-2022\20220324-SAMPLE BROTH-POS-00.d	4516	scanId=2592709		43.2117	443.27	1266.79	2	884.525	79	6155.9	R.QGGSLAKPK.R	QGGSLAKPK	DECOY_WP_012292993.1 MULTISPECIES: sn-glycerol-3-phosphate ABC transporter ATP-binding protein UgpC [Lysinibacillus]	228	236	0	884.508	0.0165958	18.7627	1	16	0.0625	178.352	0.0289725	1.02897	FALSE	TRUE	497	441	87.1502
F:\25-03-2022\20220324-SAMPLE BROTH-POS-00.d	3119	scanId=1774283		29.5712	776.924	539.758	2	1551.83	58	3725.89	R.SLGEGRLNAVFVYK.D	SLGEGRLNAVFVYK	DECOY_WP_012292517.1 MULTISPECIES: PucR family transcriptional regulator [Lysinibacillus]	206	219	1	1551.84	-0.00746671	-4.81152	1	26	0.0384615	107.8	0.0289327	1.02893	FALSE	TRUE	497	442	87.1502
F:\25-03-2022\20220324-SAMPLE BROTH-POS-00.d	3496	scanId=1997695		33.2948	744.904	645.637	2	1487.79	44	3280.77	K.MVLRQIEEEITK.E	MVLRQIEEEITK	DECOY_WP_012295505.1 MULTISPECIES: Ger(x)C family spore germination protein [Lysinibacillus]	63	74	1	1487.8	-0.00922071	-6.19754	1	22	0.0454545	94.6067	0.0288368	1.02884	FALSE	TRUE	497	443	87.1502
F:\25-03-2022\20220324-SAMPLE BROTH-POS-00.d	2948	scanId=1672178		27.8695	565.775	534.519	2	1129.54	34	1882.76	-.MYVDRQYR.K	MYVDRQYR	DECOY_WP_036220092.1 MULTISPECIES: assimilatory sulfite reductase (NADPH) flavoprotein subunit [Lysinibacillus]	1	8	1	1129.53	0.00122402	1.08365	1	14	0.0714286	54.2571	0.0288179	1.02882	FALSE	TRUE	497	444	87.1502
F:\25-03-2022\20220324-SAMPLE BROTH-POS-00.d	4225	scanId=2426140		40.4355	718.866	807.92	2	1435.72	45	3281.71	K.SSIAGDEENVFLR.W	SSIAGDEENVFLR	DECOY_WP_058845050.1 MULTISPECIES: leucine--tRNA ligase [Lysinibacillus]	163	175	0	1435.69	0.0225835	15.73	1	24	0.0416667	94.0608	0.0286621	1.02866	FALSE	TRUE	497	445	87.1502
F:\25-03-2022\20220324-SAMPLE BROTH-POS-00.d	1428	scanId=774694		12.9114	393.222	415.695	2	784.43	37	2510.54	K.RGVPNSR.I	RGVPNSR	WP_012293449.1 MULTISPECIES: guanine deaminase [Lysinibacillus]	365	371	1	784.43	-0.000793892	-1.01206	1	12	0.0833333	71.7601	0.0285835	1.02858	TRUE	FALSE	498	445	87.1502
F:\25-03-2022\20220324-SAMPLE BROTH-POS-00.d	1741	scanId=955461		15.9242	314.705	560.349	2	627.395	49	4994.4	K.LTPIGK.T	LTPIGK	WP_131521218.1 MULTISPECIES: LysR family transcriptional regulator [Lysinibacillus]	57	62	0	627.396	-0.000556389	-0.886823	1	10	0.1	142.56	0.0285441	1.02854	TRUE	FALSE	499	445	87.1502
F:\25-03-2022\20220324-SAMPLE BROTH-POS-00.d	2788	scanId=1577379		26.2895	1006.98	610	2	2011.95	44	2375.92	R.GDIVTEC[carbamidomethylation of C]SSANVYGIKDGK.L	GDIVTECSSANVYGIKDGK	WP_012295709.1 MULTISPECIES: D-amino-acid transaminase [Lysinibacillus]	173	191	1	2011.95	-0.00209363	-1.0406	1	36	0.0277778	67.8	0.0285363	1.02854	TRUE	FALSE	500	445	87.1502
F:\25-03-2022\20220324-SAMPLE BROTH-POS-00.d	4097	scanId=2351375		39.1895	525.288	602.913	2	1048.56	34	2811.96	R.ALRNEFTAK.I	ALRNEFTAK	WP_031418882.1 MULTISPECIES: nitronate monooxygenase family protein [Lysinibacillus]	239	247	1	1048.57	-0.00526142	-5.01773	1	16	0.0625	80.0282	0.0284599	1.02846	TRUE	FALSE	501	445	87.1502
F:\25-03-2022\20220324-SAMPLE BROTH-POS-00.d	2679	scanId=1512050		25.2007	767.395	447.695	2	1532.77	25	1699.01	R.EGWWIDADITVTK.T	EGWWIDADITVTK	WP_208704486.1 MULTISPECIES: CocE/NonD family hydrolase [Lysinibacillus]	629	641	0	1532.75	0.0238781	15.5786	1	24	0.0416667	48.25	0.028399	1.0284	TRUE	FALSE	502	445	87.1502
F:\25-03-2022\20220324-SAMPLE BROTH-POS-00.d	4514	scanId=2591325		43.1886	453.286	1418.89	2	904.557	67	6223.57	K.LVGKGLYR.S	LVGKGLYR	DECOY_WP_012292248.1 MULTISPECIES: phosphopyruvate hydratase [Lysinibacillus]	367	374	1	904.549	0.00767629	8.48631	1	14	0.0714286	176.615	0.0283785	1.02838	FALSE	TRUE	502	446	87.1502
F:\25-03-2022\20220324-SAMPLE BROTH-POS-00.d	3425	scanId=1956294		32.6048	646.331	883.92	2	1290.65	49	2993.26	R.NTNM(oxidation of M)RNIREK.L	NTNMRNIREK	WP_012292528.1 MULTISPECIES: serine hydrolase [Lysinibacillus]	319	328	2	1290.65	0.000784514	0.607846	1	18	0.0555556	84.7576	0.0283161	1.02832	TRUE	FALSE	503	446	87.1502
F:\25-03-2022\20220324-SAMPLE BROTH-POS-00.d	3373	scanId=1925491		32.0914	967.513	757.074	2	1933.01	38	2129.52	K.GVTYDFKPLQLAPETVR.S	GVTYDFKPLQLAPETVR	WP_012295253.1 MULTISPECIES: HD family phosphohydrolase [Lysinibacillus]	39	55	0	1933.03	-0.020251	-10.4763	1	32	0.03125	59.9013	0.028129	1.02813	TRUE	FALSE	504	446	87.1502
F:\25-03-2022\20220324-SAMPLE BROTH-POS-00.d	4532	scanId=2602295		43.3715	434.758	3180.33	2	867.502	114	10424.9	R.RFKVYR.G	RFKVYR	WP_012291837.1 MULTISPECIES: IMP dehydrogenase [Lysinibacillus]	384	389	2	867.508	-0.00599832	-6.91442	1	10	0.1	291.305	0.0279431	1.02794	TRUE	FALSE	505	446	87.1502
F:\25-03-2022\20220324-SAMPLE BROTH-POS-00.d	4056	scanId=2328891		38.8147	368.722	1699.03	2	735.428	83	8922.16	K.ALYTIR.-	ALYTIR	WP_012295980.1 MULTISPECIES: NAD(P)H-dependent oxidoreductase [Lysinibacillus]	192	197	0	735.428	0.000524472	0.713152	1	10	0.1	249.015	0.0279097	1.02791	TRUE	FALSE	506	446	87.1502
F:\25-03-2022\20220324-SAMPLE BROTH-POS-00.d	3229	scanId=1839055		30.6508	715.374	851.488	2	1428.73	45	3245.19	K.ADEDLILGDIEVK.T	ADEDLILGDIEVK	DECOY_WP_012292612.1 MULTISPECIES: response regulator transcription factor [Lysinibacillus]	87	99	0	1428.73	-0.000814229	-0.569895	1	24	0.0416667	90.344	0.0278394	1.02784	FALSE	TRUE	506	447	87.1502
F:\25-03-2022\20220324-SAMPLE BROTH-POS-00.d	2491	scanId=1399848		23.3307	589.774	486.24	2	1177.53	41	2666.93	R.LEISHAM(oxidation of M)SM(oxidation of M)K.D	LEISHAMSMK	DECOY_WP_012295715.1 MULTISPECIES: asparagine synthase (glutamine-hydrolyzing) [Lysinibacillus]	123	132	0	1177.55	-0.0132516	-11.2536	1	18	0.0555556	74	0.0277473	1.02775	FALSE	TRUE	506	448	87.1502
F:\25-03-2022\20220324-SAMPLE BROTH-POS-00.d	2065	scanId=1144780		19.0795	627.295	1545.26	2	1252.58	75	6049.71	K.ISNKSM(oxidation of M)SDVEK.V	ISNKSMSDVEK	WP_031418055.1 MULTISPECIES: DUF5050 domain-containing protein [Lysinibacillus]	189	199	1	1252.6	-0.0215214	-17.1814	1	20	0.05	167.74	0.0277269	1.02773	TRUE	FALSE	507	448	87.1502
F:\25-03-2022\20220324-SAMPLE BROTH-POS-00.d	2076	scanId=1151096		19.1848	446.733	920.167	2	891.452	32	2588.89	R.TTMNRNR.A	TTMNRNR	WP_036162138.1 MULTISPECIES: diguanylate cyclase [Lysinibacillus]	3	9	1	891.434	0.0174518	19.5772	1	12	0.0833333	71.4821	0.0276111	1.02761	TRUE	FALSE	508	448	87.1502
F:\25-03-2022\20220324-SAMPLE BROTH-POS-00.d	500	scanId=267252		4.45407	536.29	516.63	2	1070.57	35	2578.1	R.FERQHVQK.N	FERQHVQK	WP_036160542.1 MULTISPECIES: GNAT family N-acetyltransferase [Lysinibacillus]	538	545	1	1070.56	0.0041649	3.89039	1	14	0.0714286	71.0064	0.0275421	1.02754	TRUE	FALSE	509	448	87.1502
F:\25-03-2022\20220324-SAMPLE BROTH-POS-00.d	4349	scanId=2498365		41.6393	421.258	1188.16	2	840.502	45	3955.13	R.EKLLPNK.L	EKLLPNK	DECOY_WP_036160583.1 MULTISPECIES: HAMP domain-containing histidine kinase [Lysinibacillus]	189	195	1	840.507	-0.00466297	-5.5478	1	12	0.0833333	108.699	0.027483	1.02748	FALSE	TRUE	509	449	87.1502
F:\25-03-2022\20220324-SAMPLE BROTH-POS-00.d	3081	scanId=1751898		29.1982	609.312	638.286	2	1216.61	46	3091.22	K.DLEELWERK.I	DLEELWERK	DECOY_WP_012295386.1 MULTISPECIES: U32 family peptidase [Lysinibacillus]	118	126	1	1216.61	0.00103985	0.854711	1	16	0.0625	84.8772	0.0274575	1.02746	FALSE	TRUE	509	450	87.1502
F:\25-03-2022\20220324-SAMPLE BROTH-POS-00.d	2338	scanId=1306985		21.7829	724.822	737.511	2	1447.63	39	2740.11	K.DFPGMSFDTIYR.N	DFPGMSFDTIYR	WP_012295212.1 MULTISPECIES: transcriptional repressor [Lysinibacillus]	47	58	0	1447.64	-0.0154967	-10.7048	1	22	0.0454545	75.0417	0.0273863	1.02739	TRUE	FALSE	510	450	87.1502
F:\25-03-2022\20220324-SAMPLE BROTH-POS-00.d	1686	scanId=923817		15.3968	515.262	846.698	2	1028.51	36	2242.43	K.AKEM(oxidation of M)HLER.L	AKEMHLER	DECOY_WP_206701054.1 MULTISPECIES: DNA repair protein RecN [Lysinibacillus]	172	179	1	1028.51	0.00131481	1.27837	1	14	0.0714286	61.3393	0.027354	1.02735	FALSE	TRUE	510	451	87.1502
F:\25-03-2022\20220324-SAMPLE BROTH-POS-00.d	3037	scanId=1725527		28.7586	507.78	663.375	2	1013.55	30	2142.74	R.IVQIEEQR.I	IVQIEEQR	WP_036161940.1 MULTISPECIES: TetR/AcrR family transcriptional regulator [Lysinibacillus]	109	116	0	1013.55	-0.00461457	-4.55288	1	14	0.0714286	58.3141	0.0272147	1.02721	TRUE	FALSE	511	451	87.1502
F:\25-03-2022\20220324-SAMPLE BROTH-POS-00.d	3948	scanId=2265000		37.7499	454.754	709.54	2	907.493	50	3488.38	K.EGNVKAYK.L	EGNVKAYK	DECOY_WP_031416784.1 MULTISPECIES: EAL domain-containing protein [Lysinibacillus]	395	402	1	907.476	0.0166763	18.3766	1	14	0.0714286	93.1875	0.0267137	1.02671	FALSE	TRUE	511	452	87.1502
F:\25-03-2022\20220324-SAMPLE BROTH-POS-00.d	4588	scanId=2627623		43.7936	545.317	2878.02	2	1088.62	123	11120	K.KEFAVIGLGR.F	KEFAVIGLGR	WP_031418843.1 MULTISPECIES: TrkA family potassium uptake protein [Lysinibacillus]	3	12	1	1088.63	-0.014372	-13.2019	1	18	0.0555556	297.032	0.0267115	1.02671	TRUE	FALSE	512	452	87.1502
F:\25-03-2022\20220324-SAMPLE BROTH-POS-00.d	4455	scanId=2558476		42.6411	523.271	2424.04	2	1044.53	46	4488.82	K.NLLADEQSR.K	NLLADEQSR	WP_053596370.1 MULTISPECIES: FkbM family methyltransferase [Lysinibacillus]	132	140	0	1044.52	0.00654186	6.26303	1	16	0.0625	118.497	0.0263983	1.0264	TRUE	FALSE	513	452	87.1502
F:\25-03-2022\20220324-SAMPLE BROTH-POS-00.d	3881	scanId=2224439		37.0739	346.707	3188.97	2	691.4	60	5365.19	K.VEGFLK.S	VEGFLK	DECOY_WP_012292698.1 MULTISPECIES: DUF423 domain-containing protein [Lysinibacillus]	61	66	0	691.39	0.00950712	13.7507	1	10	0.1	141.582	0.0263889	1.02639	FALSE	TRUE	513	453	87.1502
F:\25-03-2022\20220324-SAMPLE BROTH-POS-00.d	1789	scanId=984114		16.4018	649.831	613.862	2	1297.65	33	2368.34	R.NHMIRKDGTAR.H	NHMIRKDGTAR	WP_012292547.1 MULTISPECIES: GNAT family N-acetyltransferase [Lysinibacillus]	157	167	2	1297.67	-0.019469	-15.003	1	20	0.05	62.4934	0.026387	1.02639	TRUE	FALSE	514	453	87.1502
F:\25-03-2022\20220324-SAMPLE BROTH-POS-00.d	2929	scanId=1660542		27.6756	935.984	430.341	2	1869.95	37	2718.84	R.AANEGDILVIDAKGNTNR.A	AANEGDILVIDAKGNTNR	WP_031418655.1 MULTISPECIES: RraA family protein [Lysinibacillus]	62	79	1	1869.95	-0.00083522	-0.446653	1	34	0.0294118	71.5	0.026298	1.0263	TRUE	FALSE	515	453	87.1502
F:\25-03-2022\20220324-SAMPLE BROTH-POS-00.d	4575	scanId=2622088		43.7013	586.834	6445.03	2	1171.65	134	11576.5	K.ELTQIREQR.T	ELTQIREQR	DECOY_WP_012292404.1 MULTISPECIES: isocitrate lyase [Lysinibacillus]	417	425	1	1171.63	0.0227326	19.4025	1	16	0.0625	304.224	0.0262795	1.02628	FALSE	TRUE	515	454	87.1502
F:\25-03-2022\20220324-SAMPLE BROTH-POS-00.d	2410	scanId=1350313		22.5051	536.29	834.12	2	1070.57	67	5364.09	R.KNARNHGFK.H	KNARNHGFK	WP_036162515.1 MULTISPECIES: 23S rRNA (uracil(1939)-C(5))-methyltransferase RlmD [Lysinibacillus]	351	359	2	1070.57	-0.00788547	-7.36565	1	16	0.0625	140.786	0.0262459	1.02625	TRUE	FALSE	516	454	87.1502
F:\25-03-2022\20220324-SAMPLE BROTH-POS-00.d	3917	scanId=2247317		37.4552	622.813	630.298	2	1243.61	39	2497.14	R.TTPENEELRR.L	TTPENEELRR	WP_012292644.1 MULTISPECIES: LuxR C-terminal-related transcriptional regulator [Lysinibacillus]	146	155	1	1243.62	-0.00457476	-3.67859	1	18	0.0555556	65.2647	0.0261358	1.02614	TRUE	FALSE	517	454	87.1502
F:\25-03-2022\20220324-SAMPLE BROTH-POS-00.d	1195	scanId=643626		10.727	512.25	889.001	2	1022.49	35	2699.16	K.M(oxidation of M)IEMLENK.E	MIEMLENK	DECOY_WP_012293051.1 MULTISPECIES: MoxR family ATPase [Lysinibacillus]	139	146	0	1022.48	0.00808879	7.91097	1	14	0.0714286	70.2663	0.0260326	1.02603	FALSE	TRUE	517	455	87.1502
F:\25-03-2022\20220324-SAMPLE BROTH-POS-00.d	4334	scanId=2489832		41.4971	580.822	371.789	2	1159.63	37	2347.88	K.NAGIGFEAIIR.G	NAGIGFEAIIR	DECOY_WP_012295744.1 MULTISPECIES: aminopeptidase [Lysinibacillus]	58	68	0	1159.63	-0.00535826	-4.62064	1	20	0.05	61.0403	0.0259981	1.026	FALSE	TRUE	517	456	87.1502
F:\25-03-2022\20220324-SAMPLE BROTH-POS-00.d	3567	scanId=2036936		33.9488	376.229	1268.88	2	750.444	53	3983.91	K.YTLAKR.L	YTLAKR	DECOY_WP_036162348.1 MULTISPECIES: o-succinylbenzoate--CoA ligase [Lysinibacillus]	455	460	1	750.439	0.00485291	6.46676	1	10	0.1	103.056	0.0258681	1.02587	FALSE	TRUE	517	457	87.1502
F:\25-03-2022\20220324-SAMPLE BROTH-POS-00.d	1821	scanId=1001961		16.6992	475.734	946.323	2	949.454	56	4169.57	K.AFAHYRW.-	AFAHYRW	WP_155593039.1 MULTISPECIES: 30S ribosomal protein S7 [Lysinibacillus]	150	156	1	949.456	-0.00212831	-2.24161	1	12	0.0833333	107	0.0256621	1.02566	TRUE	FALSE	518	457	87.1502
F:\25-03-2022\20220324-SAMPLE BROTH-POS-00.d	4240	scanId=2435611		40.5934	479.247	1105.91	2	956.479	45	3713.65	R.AERLM(oxidation of M)HGK.T	AERLMHGK	WP_012291903.1 MULTISPECIES: aminodeoxychorismate/anthranilate synthase component II [Lysinibacillus]	96	103	1	956.486	-0.00720099	-7.52858	1	14	0.0714286	94.6483	0.0254866	1.02549	TRUE	FALSE	519	457	87.1502
F:\25-03-2022\20220324-SAMPLE BROTH-POS-00.d	2479	scanId=1392261		23.2042	445.237	574.967	2	888.459	37	3157.88	K.ASNLELDK.E	ASNLELDK	WP_012293479.1 MULTISPECIES: baseplate J/gp47 family protein [Lysinibacillus]	343	350	0	888.455	0.00329457	3.7082	1	14	0.0714286	79.8368	0.0252818	1.02528	TRUE	FALSE	520	457	87.1502
F:\25-03-2022\20220324-SAMPLE BROTH-POS-00.d	2434	scanId=1365053		22.7508	409.202	674.219	2	816.39	38	3489.56	K.TGHIM(oxidation of M)SR.I	TGHIMSR	WP_036162023.1 MULTISPECIES: ABC transporter ATP-binding protein/permease [Lysinibacillus]	110	116	0	816.391	-0.000943329	-1.15549	1	12	0.0833333	88.0303	0.0252268	1.02523	TRUE	FALSE	521	457	87.1502
F:\25-03-2022\20220324-SAMPLE BROTH-POS-00.d	2910	scanId=1649792		27.4964	510.755	405.176	2	1019.49	38	2890.59	R.QQTNFLNR.D	QQTNFLNR	WP_012292372.1 MULTISPECIES: phosphoadenylyl-sulfate reductase [Lysinibacillus]	152	159	0	1019.51	-0.0200185	-19.6353	1	14	0.0714286	72.7371	0.0251634	1.02516	TRUE	FALSE	522	457	87.1502
F:\25-03-2022\20220324-SAMPLE BROTH-POS-00.d	2348	scanId=1312802		21.8799	566.8	639.917	2	1131.59	27	2045.77	R.GNEVKQATGTK.G	GNEVKQATGTK	DECOY_WP_012293155.1 MULTISPECIES: stage V sporulation protein D [Lysinibacillus]	134	144	1	1131.59	-0.00273643	-2.41822	1	20	0.05	51.3266	0.0250891	1.02509	FALSE	TRUE	522	458	87.2445
F:\25-03-2022\20220324-SAMPLE BROTH-POS-00.d	4226	scanId=2426473		40.4411	591.334	1001.16	2	1180.65	51	3431.82	R.RYIVM(oxidation of M)KSLR.E	RYIVMKSLR	DECOY_WP_012295358.1 MULTISPECIES: hypothetical protein [Lysinibacillus]	6	14	2	1180.68	-0.0208691	-17.6756	1	16	0.0625	86.0208	0.0250656	1.02507	FALSE	TRUE	522	459	87.2445
F:\25-03-2022\20220324-SAMPLE BROTH-POS-00.d	4287	scanId=2461692		41.0281	379.249	23837.9	2	756.484	86	13106	R.VDLILGK.R	VDLILGK	DECOY_WP_048394135.1 MULTISPECIES: sulfurtransferase TusA family protein [Lysinibacillus]	80	86	0	756.475	0.00986443	13.04	1	12	0.0833333	328.005	0.0250271	1.02503	FALSE	TRUE	522	460	87.2445
F:\25-03-2022\20220324-SAMPLE BROTH-POS-00.d	3300	scanId=1882166		31.3693	658.852	702.001	2	1315.69	37	2495.52	K.SQHM(oxidation of M)GQKPLFK.Y	SQHMGQKPLFK	WP_036161987.1 MULTISPECIES: AMP-binding protein [Lysinibacillus]	212	222	0	1315.67	0.0183824	13.9719	1	20	0.05	62.3091	0.0249684	1.02497	TRUE	FALSE	523	460	87.2445
F:\25-03-2022\20220324-SAMPLE BROTH-POS-00.d	2913	scanId=1651676		27.5278	706.344	757.669	2	1410.67	65	5174.69	-.MHPYYITMSLR.T	MHPYYITMSLR	DECOY_WP_031417460.1 MULTISPECIES: XRE family transcriptional regulator [Lysinibacillus]	1	11	0	1410.68	-0.00458212	-3.24816	1	20	0.05	128.463	0.0248252	1.02483	FALSE	TRUE	523	461	87.2445
F:\25-03-2022\20220324-SAMPLE BROTH-POS-00.d	50	scanId=29113		0.485083	481.278	326.664	2	960.542	27	1791.85	R.GRGVFRNR.G	GRGVFRNR	WP_012293213.1 MULTISPECIES: ribosome small subunit-dependent GTPase A [Lysinibacillus]	27	34	2	960.537	0.00552057	5.74738	1	14	0.0714286	44.258	0.0246996	1.0247	TRUE	FALSE	524	461	87.2445
F:\25-03-2022\20220324-SAMPLE BROTH-POS-00.d	3754	scanId=2148193		35.8031	507.803	1019.52	2	1013.59	50	3952.9	R.M(oxidation of M)PVNALLLK.T	MPVNALLLK	WP_031419663.1 MULTISPECIES: pentapeptide repeat-containing protein [Lysinibacillus]	168	176	0	1013.59	-0.00226523	-2.23485	1	16	0.0625	97.507	0.0246672	1.02467	TRUE	FALSE	525	461	87.2445
F:\25-03-2022\20220324-SAMPLE BROTH-POS-00.d	1999	scanId=1106815		18.4468	509.247	384.2	2	1016.48	39	3230.67	K.NAVTPEQMK.S	NAVTPEQMK	WP_206700942.1 MULTISPECIES: septum site-determining protein MinD [Lysinibacillus]	104	112	0	1016.5	-0.0157558	-15.5001	1	16	0.0625	79.3463	0.0245603	1.02456	TRUE	FALSE	526	461	87.2445
F:\25-03-2022\20220324-SAMPLE BROTH-POS-00.d	3419	scanId=1952140		32.5355	591.3	601.188	2	1180.59	56	4145.56	R.IKDC[carbamidomethylation of C]DVYLR.G	IKDCDVYLR	DECOY_WP_012295265.1 MULTISPECIES: replication-relaxation family protein [Lysinibacillus]	125	133	1	1180.59	-0.00480937	-4.07369	1	16	0.0625	101.533	0.024492	1.02449	FALSE	TRUE	526	462	87.4338
F:\25-03-2022\20220324-SAMPLE BROTH-POS-00.d	3932	scanId=2255633		37.5938	441.742	636.098	2	881.47	38	2247.81	K.LPPLDEAK.V	LPPLDEAK	DECOY_WP_012295811.1 MULTISPECIES: S1-like domain-containing RNA-binding protein [Lysinibacillus]	179	186	0	881.486	-0.0154582	-17.5365	1	14	0.0714286	55.0024	0.0244693	1.02447	FALSE	TRUE	526	463	87.623
F:\25-03-2022\20220324-SAMPLE BROTH-POS-00.d	2750	scanId=1555545		25.9256	561.279	664.377	2	1120.54	31	1948.76	K.QTASAGSTGWR.A	QTASAGSTGWR	DECOY_WP_024363854.1 MULTISPECIES: ribonuclease HIII [Lysinibacillus]	236	246	0	1120.53	0.0163745	14.6133	1	20	0.05	47.6532	0.0244531	1.02445	FALSE	TRUE	526	464	87.8123
F:\25-03-2022\20220324-SAMPLE BROTH-POS-00.d	3635	scanId=2078822		34.6469	725.862	626.39	2	1449.71	39	2336.15	R.LKFVC[carbamidomethylation of C]DHSTMGR.E	LKFVCDHSTMGR	DECOY_WP_012293306.1 MULTISPECIES: tRNA pseudouridine(55) synthase TruB [Lysinibacillus]	283	294	1	1449.69	0.023078	15.9193	1	22	0.0454545	57.0323	0.0244129	1.02441	FALSE	TRUE	526	465	87.988
F:\25-03-2022\20220324-SAMPLE BROTH-POS-00.d	2198	scanId=1223020		20.3835	695.335	444.026	2	1388.65	24	1354.35	R.EEGEREDAITIK.I	EEGEREDAITIK	DECOY_WP_012291832.1 MULTISPECIES: DNA topoisomerase (ATP-hydrolyzing) subunit B [Lysinibacillus]	423	434	1	1388.68	-0.023342	-16.8088	1	22	0.0454545	33.0028	0.024368	1.02437	FALSE	TRUE	526	466	87.988
F:\25-03-2022\20220324-SAMPLE BROTH-POS-00.d	3153	scanId=1794283		29.9046	867.46	403.592	2	1732.91	35	2220.94	K.YALDPGAVSFKEPALR.I	YALDPGAVSFKEPALR	DECOY_WP_012295278.1 MULTISPECIES: baseplate J/gp47 family protein [Lysinibacillus]	166	181	1	1732.91	-0.0091176	-5.26143	1	30	0.0333333	54.0865	0.024353	1.02435	FALSE	TRUE	526	467	87.988
F:\25-03-2022\20220324-SAMPLE BROTH-POS-00.d	4494	scanId=2580358		43.0058	562.343	3004.68	2	1122.67	107	9714.39	R.RHLKTIEAR.M	RHLKTIEAR	DECOY_WP_012292993.1 MULTISPECIES: sn-glycerol-3-phosphate ABC transporter ATP-binding protein UgpC [Lysinibacillus]	185	193	2	1122.66	0.0087984	7.83709	1	16	0.0625	236.437	0.0243388	1.02434	FALSE	TRUE	526	468	87.988
F:\25-03-2022\20220324-SAMPLE BROTH-POS-00.d	850	scanId=452313		7.53842	330.685	763.146	2	659.355	60	7039.09	K.IAEATR.E	IAEATR	DECOY_WP_008180529.1 MULTISPECIES: rod shape-determining protein [Lysinibacillus]	127	132	0	659.36	-0.00536591	-8.13806	1	10	0.1	171.001	0.0242931	1.02429	FALSE	TRUE	526	469	87.988
F:\25-03-2022\20220324-SAMPLE BROTH-POS-00.d	2481	scanId=1392927		23.2153	351.726	1066.9	2	701.437	44	3717.91	K.TLEVLK.I	TLEVLK	WP_012292501.1 MULTISPECIES: sensor histidine kinase [Lysinibacillus]	133	138	0	701.432	0.00477885	6.81299	1	10	0.1	90.1405	0.0242449	1.02424	TRUE	FALSE	527	469	87.988
F:\25-03-2022\20220324-SAMPLE BROTH-POS-00.d	6042	scanId=3382567		56.376	616.367	1267.7	2	1230.72	118	8661.57	K.QILFIREANK.N	QILFIREANK	DECOY_WP_036161851.1 MULTISPECIES: GrpB family protein [Lysinibacillus]	146	155	1	1230.71	0.0118337	9.61533	1	18	0.0555556	209.322	0.0241668	1.02417	FALSE	TRUE	527	470	87.988
F:\25-03-2022\20220324-SAMPLE BROTH-POS-00.d	3599	scanId=2056876		34.2811	736.415	920.13	2	1470.82	55	3266.85	K.IGDLVNVETDLVGK.Y	IGDLVNVETDLVGK	WP_053595319.1 MULTISPECIES: riboflavin synthase [Lysinibacillus]	174	187	0	1470.79	0.0222822	15.1498	1	26	0.0384615	77.5707	0.0237448	1.02374	TRUE	FALSE	528	470	87.988
F:\25-03-2022\20220324-SAMPLE BROTH-POS-00.d	2599	scanId=1463959		24.3992	693.868	730.299	2	1385.72	43	2580.06	K.QVQRLADESGKR.E	QVQRLADESGKR	DECOY_WP_012292731.1 MULTISPECIES: methylmalonyl-CoA mutase family protein [Lysinibacillus]	726	737	2	1385.74	-0.0156312	-11.2801	1	22	0.0454545	61.0568	0.0236648	1.02366	FALSE	TRUE	528	471	87.988
F:\25-03-2022\20220324-SAMPLE BROTH-POS-00.d	3196	scanId=1819052		30.3174	692.294	355.935	2	1382.57	42	2469.85	K.M(oxidation of M)LEDSGVM(oxidation of M)QGER.F	MLEDSGVMQGER	WP_031418973.1 MULTISPECIES: ATP-dependent DNA helicase RecG [Lysinibacillus]	668	679	0	1382.58	-0.00620589	-4.48863	1	22	0.0454545	58.3706	0.0236332	1.02363	TRUE	FALSE	529	471	87.988
F:\25-03-2022\20220324-SAMPLE BROTH-POS-00.d	1784	scanId=981232		16.3537	431.214	453.645	2	860.414	27	2220.77	K.EKENWR.D	EKENWR	WP_031418479.1 MULTISPECIES: heterodisulfide reductase-related iron-sulfur binding cluster [Lysinibacillus]	433	438	1	860.414	0.000158978	0.184769	1	10	0.1	52.3608	0.0235778	1.02358	TRUE	FALSE	530	471	87.988
F:\25-03-2022\20220324-SAMPLE BROTH-POS-00.d	2480	scanId=1392594		23.2098	472.776	849.861	2	943.538	41	3137.02	R.VEGNTAIIK.G	VEGNTAIIK	WP_031418489.1 MULTISPECIES: UDP-N-acetylglucosamine 1-carboxyvinyltransferase [Lysinibacillus]	348	356	0	943.534	0.00372908	3.95225	1	16	0.0625	73.6095	0.0234648	1.02346	TRUE	FALSE	531	471	87.988
F:\25-03-2022\20220324-SAMPLE BROTH-POS-00.d	4234	scanId=2431457		40.5241	857.405	647.668	2	1712.8	42	2599.6	M.PNIQADQSAAGSTNDPK.E	PNIQADQSAAGSTNDPK	DECOY_WP_012293721.1 MULTISPECIES: copper amine oxidase N-terminal domain-containing protein [Lysinibacillus]	2	18	0	1712.8	-0.000138995	-0.0811507	1	32	0.03125	60.8523	0.0234083	1.02341	FALSE	TRUE	531	472	87.988
F:\25-03-2022\20220324-SAMPLE BROTH-POS-00.d	4405	scanId=2530434		42.1738	509.805	1041.68	2	1017.59	62	4647.16	R.GFVVRELAK.T	GFVVRELAK	WP_012293186.1 MULTISPECIES: carbamoyl phosphate synthase small subunit [Lysinibacillus]	78	86	1	1017.6	-0.00238197	-2.34077	1	16	0.0625	108.633	0.0233762	1.02338	TRUE	FALSE	532	472	87.988
F:\25-03-2022\20220324-SAMPLE BROTH-POS-00.d	887	scanId=471949		7.86568	307.206	623.459	2	612.398	23	1505.25	K.KQPLK.D	KQPLK	WP_012294039.1 MULTISPECIES: hypothetical protein [Lysinibacillus]	60	64	1	612.396	0.00243076	3.96926	1	8	0.125	35.059	0.0232911	1.02329	TRUE	FALSE	533	472	87.988
F:\25-03-2022\20220324-SAMPLE BROTH-POS-00.d	3511	scanId=2006177		33.4361	742.868	485.746	2	1483.72	25	1921.46	R.LAALAKYFDQTDE.-	LAALAKYFDQTDE	WP_031418910.1 MULTISPECIES: YceD family protein [Lysinibacillus]	165	177	1	1483.72	0.00100105	0.674691	1	24	0.0416667	44.7353	0.0232819	1.02328	TRUE	FALSE	534	472	87.988
F:\25-03-2022\20220324-SAMPLE BROTH-POS-00.d	4120	scanId=2365137		39.4188	452.277	887.536	2	902.54	46	3671.42	R.EISKLVSK.R	EISKLVSK	DECOY_WP_012293801.1 MULTISPECIES: EAL domain-containing protein [Lysinibacillus]	341	348	1	902.544	-0.00380855	-4.2198	1	14	0.0714286	85.4144	0.0232647	1.02326	FALSE	TRUE	534	473	88.1745
F:\25-03-2022\20220324-SAMPLE BROTH-POS-00.d	3637	scanId=2080207		34.67	324.694	2136.78	2	647.374	66	6674.31	R.LPSFGK.K	LPSFGK	DECOY_WP_012293973.1 MULTISPECIES: iron ABC transporter permease [Lysinibacillus]	186	191	0	647.364	0.00984771	15.212	1	10	0.1	154.842	0.0231996	1.0232	FALSE	TRUE	534	474	88.1957
F:\25-03-2022\20220324-SAMPLE BROTH-POS-00.d	3001	scanId=1703868		28.3977	624.347	780.727	2	1246.68	46	2940.75	R.SIRNSQGMKVK.Q	SIRNSQGMKVK	WP_197148452.1 MULTISPECIES: isoleucine--tRNA ligase [Lysinibacillus]	803	813	2	1246.68	-0.00256982	-2.06133	1	20	0.05	68.0616	0.0231443	1.02314	TRUE	FALSE	535	474	88.1957
F:\25-03-2022\20220324-SAMPLE BROTH-POS-00.d	2451	scanId=1375523		22.9252	597.291	519.672	2	1192.57	36	2018.22	K.EESVRSMNNK.H	EESVRSMNNK	DECOY_WP_217580955.1 MULTISPECIES: DNA topoisomerase III [Lysinibacillus]	478	487	1	1192.55	0.0162714	13.6442	1	18	0.0555556	46.4211	0.023001	1.023	FALSE	TRUE	535	475	88.3818
F:\25-03-2022\20220324-SAMPLE BROTH-POS-00.d	4605	scanId=2634330		43.9054	553.83	4032.95	2	1105.65	146	11670.5	K.RAISEVLYR.Y	RAISEVLYR	DECOY_WP_012295782.1 MULTISPECIES: RNA polymerase sigma factor SigB [Lysinibacillus]	216	224	1	1105.62	0.0207563	18.7734	1	16	0.0625	267.435	0.0229155	1.02292	FALSE	TRUE	535	476	88.5678
F:\25-03-2022\20220324-SAMPLE BROTH-POS-00.d	2114	scanId=1174201		19.5699	573.793	462.17	2	1145.57	36	2856.38	K.KHQLDTYNK.-	KHQLDTYNK	DECOY_WP_031418918.1 MULTISPECIES: UDP-N-acetylmuramoyl-L-alanine--D-glutamate ligase [Lysinibacillus]	441	449	1	1145.58	-0.0114938	-10.0331	1	16	0.0625	65.391	0.022893	1.02289	FALSE	TRUE	535	477	88.7539
F:\25-03-2022\20220324-SAMPLE BROTH-POS-00.d	2041	scanId=1130763		18.8459	444.249	409.483	2	886.483	42	3074.18	K.GLKDAVER.I	GLKDAVER	DECOY_WP_069513748.1 MULTISPECIES: pyruvate kinase [Lysinibacillus]	530	537	1	886.487	-0.00390399	-4.40388	1	14	0.0714286	69.9185	0.0227438	1.02274	FALSE	TRUE	535	478	88.9181
F:\25-03-2022\20220324-SAMPLE BROTH-POS-00.d	4359	scanId=2504567		41.7426	945.977	1006.17	2	1889.94	59	3981.84	M.DREYPISDPIEAFPNK.E	DREYPISDPIEAFPNK	DECOY_WP_012293092.1 MULTISPECIES: peptide deformylase [Lysinibacillus]	2	17	1	1889.92	0.023945	12.6699	1	30	0.0333333	90.5435	0.0227391	1.02274	FALSE	TRUE	535	479	88.9181
F:\25-03-2022\20220324-SAMPLE BROTH-POS-00.d	3688	scanId=2108688		35.1447	307.175	1338.12	2	612.335	43	5878.26	K.YFKR.N	YFKR	DECOY_WP_012295508.1 MULTISPECIES: nucleoid-associated protein [Lysinibacillus]	10	13	1	612.338	-0.00372241	-6.07901	1	6	0.166667	133.493	0.0227097	1.02271	FALSE	TRUE	535	480	88.9181
F:\25-03-2022\20220324-SAMPLE BROTH-POS-00.d	3040	scanId=1727243		28.7873	486.79	680.048	2	971.565	47	3446.15	R.ILTVTNSPK.V	ILTVTNSPK	WP_031416324.1 MULTISPECIES: CPBP family intramembrane metalloprotease [Lysinibacillus]	4	12	0	971.565	3.03496e-06	0.00312378	1	16	0.0625	78.1853	0.0226877	1.02269	TRUE	FALSE	536	480	88.9181
F:\25-03-2022\20220324-SAMPLE BROTH-POS-00.d	3310	scanId=1887983		31.4662	729.843	657.735	2	1457.67	37	2492.28	K.IEPGYSIEYTMR.D	IEPGYSIEYTMR	DECOY_WP_217581243.1 MULTISPECIES: DUF3888 domain-containing protein [Lysinibacillus]	18	29	0	1457.69	-0.0143061	-9.81424	1	22	0.0454545	56.4569	0.0226527	1.02265	FALSE	TRUE	536	481	88.9181
F:\25-03-2022\20220324-SAMPLE BROTH-POS-00.d	4367	scanId=2508833		41.8137	727.877	825.024	2	1453.74	57	3298.85	R.DYLLNVISEFNK.H	DYLLNVISEFNK	WP_036161702.1 MULTISPECIES: MBL fold metallo-hydrolase [Lysinibacillus]	247	258	0	1453.75	-0.00523145	-3.5986	1	22	0.0454545	74.5728	0.0226057	1.02261	TRUE	FALSE	537	481	88.9181
F:\25-03-2022\20220324-SAMPLE BROTH-POS-00.d	2440	scanId=1368653		22.8107	588.809	755.516	2	1175.6	48	2925.11	K.TKQLNAMDQK.V	TKQLNAMDQK	DECOY_WP_012292913.1 MULTISPECIES: flagellar protein FliT [Lysinibacillus]	28	37	1	1175.6	0.00596158	5.07111	1	18	0.0555556	66.0056	0.0225652	1.02257	FALSE	TRUE	537	482	88.9181
F:\25-03-2022\20220324-SAMPLE BROTH-POS-00.d	4251	scanId=2441594		40.6931	501.27	1103.84	2	1000.52	44	3243.54	M.ALALEQNDK.I	ALALEQNDK	WP_012295386.1 MULTISPECIES: U32 family peptidase [Lysinibacillus]	2	10	0	1000.52	0.00555526	5.55238	1	16	0.0625	72.7038	0.022415	1.02241	TRUE	FALSE	538	482	88.9181
F:\25-03-2022\20220324-SAMPLE BROTH-POS-00.d	2129	scanId=1182567		19.7093	627.289	942.647	2	1252.56	46	3202.32	K.VGDLVM(oxidation of M)M(oxidation of M)PM(oxidation of M)GR.V	VGDLVMMPMGR	WP_012296135.1 MULTISPECIES: VOC family protein [Lysinibacillus]	97	107	0	1252.56	0.00191497	1.52884	1	20	0.05	71.4286	0.0223052	1.02231	TRUE	FALSE	539	482	88.9181
F:\25-03-2022\20220324-SAMPLE BROTH-POS-00.d	3894	scanId=2232524		37.2086	329.188	4675.74	2	656.361	72	8420.3	M.LPNASR.E	LPNASR	DECOY_WP_012292662.1 MULTISPECIES: hydroxymethylglutaryl-CoA lyase [Lysinibacillus]	2	7	0	656.361	1.31167e-06	0.0019984	1	10	0.1	186.817	0.0221865	1.02219	FALSE	TRUE	539	483	88.9181
F:\25-03-2022\20220324-SAMPLE BROTH-POS-00.d	880	scanId=468067		7.80098	458.741	390.578	2	915.468	36	2628	K.GIQKEGER.D	GIQKEGER	DECOY_WP_012295364.1 MULTISPECIES: GPR endopeptidase [Lysinibacillus]	278	285	1	915.477	-0.00949428	-10.3708	1	14	0.0714286	58.1894	0.0221421	1.02214	FALSE	TRUE	539	484	88.9181
F:\25-03-2022\20220324-SAMPLE BROTH-POS-00.d	3024	scanId=1717437		28.6238	466.775	984.136	2	931.535	49	3506.3	R.KM(oxidation of M)QQIIR.T	KMQQIIR	DECOY_WP_012293460.1 MULTISPECIES: ABC transporter permease [Lysinibacillus]	326	332	1	931.527	0.00776835	8.33937	1	12	0.0833333	77.0062	0.0219623	1.02196	FALSE	TRUE	539	485	88.9181
F:\25-03-2022\20220324-SAMPLE BROTH-POS-00.d	2611	scanId=1471327		24.522	605.339	646.68	2	1208.66	43	3075.93	K.RVVLIDYGM(oxidation of M)K.H	RVVLIDYGMK	WP_012293186.1 MULTISPECIES: carbamoyl phosphate synthase small subunit [Lysinibacillus]	174	183	1	1208.66	0.00565567	4.67929	1	18	0.0555556	67.5473	0.0219599	1.02196	TRUE	FALSE	540	485	88.9181
F:\25-03-2022\20220324-SAMPLE BROTH-POS-00.d	2712	scanId=1532441		25.5405	507.746	1113.36	2	1013.48	30	2333.98	K.AGSFTEQFK.T	AGSFTEQFK	DECOY_WP_054550606.1 MULTISPECIES: SMC-Scp complex subunit ScpB [Lysinibacillus]	3	11	0	1013.48	-0.00534795	-5.27681	1	16	0.0625	51	0.0218511	1.02185	FALSE	TRUE	540	486	88.9181
F:\25-03-2022\20220324-SAMPLE BROTH-POS-00.d	2154	scanId=1197419		19.9568	596.812	693.151	2	1191.61	31	1928.78	K.TVTYEQVPQK.E	TVTYEQVPQK	WP_036162649.1 MULTISPECIES: VanW family protein [Lysinibacillus]	47	56	0	1191.61	-0.00474933	-3.98563	1	18	0.0555556	42	0.0217754	1.02178	TRUE	FALSE	541	486	88.9181
F:\25-03-2022\20220324-SAMPLE BROTH-POS-00.d	994	scanId=529082		8.8179	472.746	508.304	2	943.477	32	2541.66	K.IPNMGEKR.G	IPNMGEKR	DECOY_WP_036161253.1 MULTISPECIES: malate dehydrogenase [Lysinibacillus]	171	178	1	943.491	-0.0143871	-15.2488	1	14	0.0714286	55.1724	0.0217072	1.02171	FALSE	TRUE	541	487	88.9181
F:\25-03-2022\20220324-SAMPLE BROTH-POS-00.d	4011	scanId=2302737		38.3788	440.251	1092.56	2	878.488	46	3966.18	K.DIKSTSTK.D	DIKSTSTK	DECOY_WP_036160378.1 MULTISPECIES: ABC-F type ribosomal protection protein [Lysinibacillus]	82	89	1	878.471	0.0167136	19.0257	1	14	0.0714286	86.0893	0.0217059	1.02171	FALSE	TRUE	541	488	88.9181
F:\25-03-2022\20220324-SAMPLE BROTH-POS-00.d	1476	scanId=802576		13.3761	236.678	1292	2	471.342	32	2643.37	K.VLLK.Q	VLLK	DECOY_WP_227256817.1 MULTISPECIES: SagB/ThcOx family dehydrogenase [Lysinibacillus]	99	102	0	471.342	-0.000401622	-0.852082	1	6	0.166667	57.0089	0.0215667	1.02157	FALSE	TRUE	541	489	88.9181
F:\25-03-2022\20220324-SAMPLE BROTH-POS-00.d	5108	scanId=2901569		48.3593	621.387	1714.38	2	1240.76	141	11932.1	K.KLKFHQLISK.D	KLKFHQLISK	DECOY_WP_036162738.1 MULTISPECIES: MATE family efflux transporter [Lysinibacillus]	222	231	2	1240.77	-0.0064955	-5.23507	1	18	0.0555556	257.009	0.0215392	1.02154	FALSE	TRUE	541	490	88.9181
F:\25-03-2022\20220324-SAMPLE BROTH-POS-00.d	3790	scanId=2170467		36.1743	550.797	700.596	2	1099.58	36	2145.07	K.WSELSIHTK.N	WSELSIHTK	WP_206700954.1 MULTISPECIES: 50S ribosomal protein L11 methyltransferase [Lysinibacillus]	7	15	0	1099.57	0.0135366	12.3108	1	16	0.0625	45.6333	0.0212736	1.02127	TRUE	FALSE	542	490	88.9181
F:\25-03-2022\20220324-SAMPLE BROTH-POS-00.d	3756	scanId=2149577		35.8261	679.865	627.927	2	1357.72	36	2007.05	K.MYLRSVPISHR.N	MYLRSVPISHR	DECOY_WP_206701073.1 LytTR family DNA-binding domain-containing protein [Lysinibacillus fusiformis]	13	23	1	1357.73	-0.012951	-9.5387	1	20	0.05	42.5089	0.0211798	1.02118	FALSE	TRUE	542	491	88.9181
F:\25-03-2022\20220324-SAMPLE BROTH-POS-00.d	6138	scanId=3432063		57.2009	978.925	697.394	2	1955.83	78	5392.42	K.MAYEIEEDRSWGWER.V	MAYEIEEDRSWGWER	DECOY_WP_036162036.1 MULTISPECIES: argininosuccinate synthase [Lysinibacillus]	240	254	1	1955.85	-0.0124733	-6.37743	1	28	0.0357143	113.1	0.0209739	1.02097	FALSE	TRUE	542	492	88.9181
F:\25-03-2022\20220324-SAMPLE BROTH-POS-00.d	1777	scanId=977516		16.2918	649.333	563.751	2	1296.65	26	1820.17	-.M(oxidation of M)ITSFSKPTNR.G	MITSFSKPTNR	WP_036161991.1 MULTISPECIES: MFS transporter [Lysinibacillus]	1	11	0	1296.65	0.00126313	0.974149	1	20	0.05	38.025	0.0208909	1.02089	TRUE	FALSE	543	492	88.9181
F:\25-03-2022\20220324-SAMPLE BROTH-POS-00.d	2020	scanId=1119233		18.6537	457.266	1278.2	2	912.518	41	4524.28	K.EGPVSIRR.S	EGPVSIRR	WP_012293016.1 MULTISPECIES: efflux RND transporter permease subunit [Lysinibacillus]	790	797	1	912.514	0.00350423	3.84019	1	14	0.0714286	94.3577	0.0208559	1.02086	TRUE	FALSE	544	492	88.9181
F:\25-03-2022\20220324-SAMPLE BROTH-POS-00.d	5437	scanId=3072456		51.2075	978.94	848.331	2	1955.86	68	4249.7	R.SFSIEM(oxidation of M)DRGDGQDNVDR.V	SFSIEMDRGDGQDNVDR	DECOY_WP_012293721.1 MULTISPECIES: copper amine oxidase N-terminal domain-containing protein [Lysinibacillus]	858	874	1	1955.83	0.0367877	18.8093	1	32	0.03125	88.1226	0.0207362	1.02074	FALSE	TRUE	544	493	88.9181
F:\25-03-2022\20220324-SAMPLE BROTH-POS-00.d	3984	scanId=2286670		38.111	559.793	401.314	2	1117.57	23	1336.69	K.LNVSNVEESK.I	LNVSNVEESK	WP_012295943.1 MULTISPECIES: PLP-dependent aminotransferase family protein [Lysinibacillus]	417	426	0	1117.56	0.0107504	9.61954	1	18	0.0555556	27.6125	0.0206573	1.02066	TRUE	FALSE	545	493	88.9181
F:\25-03-2022\20220324-SAMPLE BROTH-POS-00.d	2483	scanId=1394311		23.2384	567.778	892.946	2	1133.54	46	3072.87	K.EDVSGVKGSEK.T	EDVSGVKGSEK	DECOY_WP_126657807.1 MULTISPECIES: precorrin-6A reductase [Lysinibacillus]	48	58	1	1133.56	-0.014145	-12.4784	1	20	0.05	63.2571	0.0205857	1.02059	FALSE	TRUE	545	494	88.9181
F:\25-03-2022\20220324-SAMPLE BROTH-POS-00.d	4233	scanId=2431124		40.5186	390.735	1641.23	2	779.456	63	5348.66	R.FITGSKK.V	FITGSKK	WP_012292936.1 MULTISPECIES: TVP38/TMEM64 family protein [Lysinibacillus]	86	92	1	779.454	0.00188033	2.41236	1	12	0.0833333	109.898	0.0205468	1.02055	TRUE	FALSE	546	494	88.9181
F:\25-03-2022\20220324-SAMPLE BROTH-POS-00.d	1800	scanId=990432		16.5071	682.847	428.374	2	1363.68	32	1871.42	-.MQNFEIVVEQK.C	MQNFEIVVEQK	WP_012295161.1 MULTISPECIES: Flp pilus assembly complex ATPase component TadA [Lysinibacillus]	1	11	0	1363.68	-0.0012345	-0.905273	1	20	0.05	38.4448	0.0205431	1.02054	TRUE	FALSE	547	494	88.9181
F:\25-03-2022\20220324-SAMPLE BROTH-POS-00.d	3009	scanId=1707966		28.466	950.001	1304.62	2	1897.99	69	4120.87	K.HLTVSQASVVMGC[carbamidomethylation of C]GLLAR.A	HLTVSQASVVMGCGLLAR	WP_036161791.1 MULTISPECIES: MFS transporter [Lysinibacillus]	34	51	0	1897.99	0.000188915	0.0995345	1	34	0.0294118	84.432	0.0204889	1.02049	TRUE	FALSE	548	494	88.9181
F:\25-03-2022\20220324-SAMPLE BROTH-POS-00.d	3343	scanId=1907100		31.7849	546.301	414.93	2	1090.59	37	2751.38	-.M(oxidation of M)NAQKLSKR.L	MNAQKLSKR	WP_031417022.1 MULTISPECIES: tRNA (adenine(22)-N(1))-methyltransferase TrmK [Lysinibacillus]	1	9	2	1090.59	-0.00390834	-3.58368	1	16	0.0625	56.2316	0.0204376	1.02044	TRUE	FALSE	549	494	88.9181
F:\25-03-2022\20220324-SAMPLE BROTH-POS-00.d	1996	scanId=1104931		18.4154	382.687	2962.12	2	763.359	65	8756.37	R.M(oxidation of M)EANRK.L	MEANRK	WP_036161681.1 MULTISPECIES: Ger(x)C family spore germination protein [Lysinibacillus]	77	82	1	763.365	-0.00551955	-7.23055	1	10	0.1	177.043	0.0202187	1.02022	TRUE	FALSE	550	494	88.9181
F:\25-03-2022\20220324-SAMPLE BROTH-POS-00.d	3034	scanId=1723809		28.73	644.843	1327.56	2	1287.67	54	3838.52	K.TNTVILSPQMGK.N	TNTVILSPQMGK	DECOY_WP_012295150.1 MULTISPECIES: hypothetical protein [Lysinibacillus]	376	387	0	1287.69	-0.014876	-11.5525	1	22	0.0454545	77.5206	0.0201954	1.0202	FALSE	TRUE	550	495	88.9181
F:\25-03-2022\20220324-SAMPLE BROTH-POS-00.d	3882	scanId=2224772		37.0794	357.698	3233.23	2	713.381	49	3970.55	R.QEVNPK.L	QEVNPK	WP_031417064.1 MULTISPECIES: VOC family protein [Lysinibacillus]	117	122	0	713.371	0.0097507	13.6685	1	10	0.1	80.0979	0.020173	1.02017	TRUE	FALSE	551	495	88.9181
F:\25-03-2022\20220324-SAMPLE BROTH-POS-00.d	4123	scanId=2367021		39.4502	496.297	1001.43	2	990.58	55	4142.78	K.RKNVM(oxidation of M)SIK.A	RKNVMSIK	WP_012295792.1 MULTISPECIES: PH domain-containing protein [Lysinibacillus]	452	459	2	990.564	0.0150948	15.2386	1	14	0.0714286	82.3207	0.0198709	1.01987	TRUE	FALSE	552	495	88.9181
F:\25-03-2022\20220324-SAMPLE BROTH-POS-00.d	5677	scanId=3196185		53.2696	611.331	1150.43	2	1220.65	116	10230.1	K.VWQSLM(oxidation of M)KVSK.I	VWQSLMKVSK	WP_031419072.1 MULTISPECIES: (2Fe-2S)-binding protein [Lysinibacillus]	143	152	1	1220.66	-0.0119189	-9.76428	1	18	0.0555556	200.766	0.019625	1.01963	TRUE	FALSE	553	495	88.9181
F:\25-03-2022\20220324-SAMPLE BROTH-POS-00.d	2175	scanId=1208999		20.1499	301.202	1248.56	2	600.389	32	3898.04	R.LDIIK.D	LDIIK	DECOY_WP_031418479.1 MULTISPECIES: heterodisulfide reductase-related iron-sulfur binding cluster [Lysinibacillus]	343	347	0	600.385	0.00387557	6.45515	1	8	0.125	75.8441	0.019457	1.01946	FALSE	TRUE	553	496	88.9181
F:\25-03-2022\20220324-SAMPLE BROTH-POS-00.d	4534	scanId=2602960		43.3825	584.358	2179.92	2	1166.7	113	8064.98	K.GLPIIREKGGK.G	GLPIIREKGGK	DECOY_WP_012293406.1 MULTISPECIES: site-specific tyrosine recombinase XerD [Lysinibacillus]	118	128	2	1166.71	-0.0121086	-10.3784	1	20	0.05	156.012	0.0193443	1.01934	FALSE	TRUE	553	497	88.9181
F:\25-03-2022\20220324-SAMPLE BROTH-POS-00.d	5502	scanId=3105308		51.755	1260.66	465.88	2	2519.3	71	4155.77	K.VAREEGILC[carbamidomethylation of C]GISSGAAIYAAIEAAK.R	VAREEGILCGISSGAAIYAAIEAAK	WP_012291901.1 MULTISPECIES: cysteine synthase A [Lysinibacillus]	256	280	1	2519.31	-0.0056352	-2.23681	1	48	0.0208333	80.275	0.0193165	1.01932	TRUE	FALSE	554	497	88.9181
F:\25-03-2022\20220324-SAMPLE BROTH-POS-00.d	4404	scanId=2530101		42.1682	520.796	3927.55	2	1039.58	63	5575.37	K.QQLLVHM(oxidation of M)R.A	QQLLVHMR	DECOY_WP_053597072.1 MULTISPECIES: 1-deoxy-D-xylulose-5-phosphate synthase [Lysinibacillus]	10	17	0	1039.56	0.0168329	16.1923	1	14	0.0714286	106.571	0.0191146	1.01911	FALSE	TRUE	554	498	88.9181
F:\25-03-2022\20220324-SAMPLE BROTH-POS-00.d	2876	scanId=1629790		27.163	659.373	535.055	2	1316.73	38	3004.46	K.NVGLALEQAKM(oxidation of M)K.Q	NVGLALEQAKMK	WP_012292890.1 MULTISPECIES: sensor histidine kinase [Lysinibacillus]	156	167	1	1316.71	0.0190791	14.49	1	22	0.0454545	57	0.0189718	1.01897	TRUE	FALSE	555	498	88.9181
F:\25-03-2022\20220324-SAMPLE BROTH-POS-00.d	1695	scanId=928581		15.4762	421.731	866.586	2	841.447	39	3307.07	M.KSGFEFK.D	KSGFEFK	WP_217581244.1 MULTISPECIES: GNAT family N-acetyltransferase [Lysinibacillus]	2	8	1	841.433	0.0136333	16.2024	1	12	0.0833333	62.6327	0.0189391	1.01894	TRUE	FALSE	556	498	88.9181
F:\25-03-2022\20220324-SAMPLE BROTH-POS-00.d	4394	scanId=2524618		42.0768	496.304	1528.06	2	990.594	57	4470.93	K.ILRIFDSK.S	ILRIFDSK	DECOY_WP_089986115.1 MULTISPECIES: tyrosine--tRNA ligase [Lysinibacillus]	41	48	1	990.586	0.00729423	7.36355	1	14	0.0714286	84.4741	0.0188941	1.01889	FALSE	TRUE	556	499	88.9181
F:\25-03-2022\20220324-SAMPLE BROTH-POS-00.d	2680	scanId=1512383		25.2063	755.389	385.117	2	1508.76	30	1828.45	K.SMGHEGRPAKFHR.K	SMGHEGRPAKFHR	DECOY_WP_036162247.1 MULTISPECIES: GTPase ObgE [Lysinibacillus]	357	369	1	1508.74	0.0224093	14.8529	1	24	0.0416667	34.1176	0.0186593	1.01866	FALSE	TRUE	556	500	88.9181
F:\25-03-2022\20220324-SAMPLE BROTH-POS-00.d	4549	scanId=2610107		43.5016	550.799	1777.7	2	1099.58	84	7018.25	K.SYLKLFDSK.K	SYLKLFDSK	WP_036161073.1 MULTISPECIES: response regulator transcription factor [Lysinibacillus]	134	142	1	1099.59	-0.00875249	-7.95976	1	16	0.0625	130.551	0.0186016	1.0186	TRUE	FALSE	557	500	88.9181
F:\25-03-2022\20220324-SAMPLE BROTH-POS-00.d	4321	scanId=2481410		41.3567	381.189	1467.52	2	760.364	45	5655.2	R.EM(oxidation of M)LQPK.A	EMLQPK	DECOY_WP_012291833.1 MULTISPECIES: DNA gyrase subunit A [Lysinibacillus]	411	416	0	760.379	-0.0151386	-19.9092	1	10	0.1	105.132	0.0185902	1.01859	FALSE	TRUE	557	501	88.9181
F:\25-03-2022\20220324-SAMPLE BROTH-POS-00.d	2138	scanId=1188219		19.8035	761.834	361.267	2	1521.65	19	1376.85	R.YEDM(oxidation of M)SKGEYEKK.L	YEDMSKGEYEKK	DECOY_WP_036161851.1 MULTISPECIES: GrpB family protein [Lysinibacillus]	24	35	2	1521.67	-0.012428	-8.16739	1	22	0.0454545	25.4737	0.0185015	1.0185	FALSE	TRUE	557	502	88.9181
F:\25-03-2022\20220324-SAMPLE BROTH-POS-00.d	1558	scanId=849418		14.1568	450.728	482.695	2	899.442	35	2108.41	K.ADAYVFSK.L	ADAYVFSK	WP_227256943.1 MULTISPECIES: recombinase family protein [Lysinibacillus]	365	372	0	899.439	0.00303437	3.37363	1	14	0.0714286	39	0.0184973	1.0185	TRUE	FALSE	558	502	88.9181
F:\25-03-2022\20220324-SAMPLE BROTH-POS-00.d	4023	scanId=2310274		38.5044	456.782	976.902	2	911.55	68	4920.8	K.NKPGRKGR.Q	NKPGRKGR	WP_036075119.1 MULTISPECIES: phage portal protein [Lysinibacillus]	49	56	2	911.541	0.00858905	9.42255	1	14	0.0714286	90.7241	0.0184369	1.01844	TRUE	FALSE	559	502	88.9181
F:\25-03-2022\20220324-SAMPLE BROTH-POS-00.d	2862	scanId=1622476		27.0411	555.835	503.554	2	1109.66	62	3934.06	K.RLVKNNNPR.N	RLVKNNNPR	WP_012292275.1 MULTISPECIES: HNH endonuclease [Lysinibacillus]	203	211	2	1109.64	0.0139647	12.5849	1	16	0.0625	71.6125	0.0182032	1.0182	TRUE	FALSE	560	502	88.9181
F:\25-03-2022\20220324-SAMPLE BROTH-POS-00.d	1157	scanId=621563		10.3592	440.244	898.324	2	878.473	36	2588.82	K.M(oxidation of M)TATKVGR.D	MTATKVGR	WP_012291848.1 MULTISPECIES: heavy metal translocating P-type ATPase [Lysinibacillus]	377	384	1	878.464	0.00832358	9.47514	1	14	0.0714286	47.036	0.0181689	1.01817	TRUE	FALSE	561	502	88.9181
F:\25-03-2022\20220324-SAMPLE BROTH-POS-00.d	4397	scanId=2525617		42.0935	423.737	1626.89	2	845.46	87	7030.39	K.IKTEEAR.D	IKTEEAR	WP_036160442.1 MULTISPECIES: SGNH/GDSL hydrolase family protein [Lysinibacillus]	85	91	1	845.461	-0.001138	-1.34601	1	12	0.0833333	127.633	0.0181544	1.01815	TRUE	FALSE	562	502	88.9181
F:\25-03-2022\20220324-SAMPLE BROTH-POS-00.d	2135	scanId=1186335		19.7721	494.743	450.778	2	987.471	39	2925.03	R.AIVEDANEK.N	AIVEDANEK	DECOY_WP_103117223.1 MULTISPECIES: serine--tRNA ligase [Lysinibacillus]	354	362	0	987.487	-0.0160997	-16.3037	1	16	0.0625	53.0023	0.0181202	1.01812	FALSE	TRUE	562	503	88.937
F:\25-03-2022\20220324-SAMPLE BROTH-POS-00.d	4663	scanId=2656866		44.281	491.793	8428.89	2	981.571	142	14611.3	K.FKIVNAYK.L	FKIVNAYK	WP_036160800.1 MULTISPECIES: DUF2268 domain-containing putative Zn-dependent protease [Lysinibacillus]	51	58	1	981.565	0.00645443	6.57566	1	14	0.0714286	262.641	0.0179752	1.01798	TRUE	FALSE	563	503	88.937
F:\25-03-2022\20220324-SAMPLE BROTH-POS-00.d	1951	scanId=1078716		17.9785	664.806	610.778	2	1327.6	47	3553.05	R.DMNM(oxidation of M)VVIYEAK.N	DMNMVVIYEAK	DECOY_WP_036160903.1 MULTISPECIES: sensor histidine kinase [Lysinibacillus]	439	449	0	1327.62	-0.0169055	-12.7338	1	20	0.05	63.1653	0.0177778	1.01778	FALSE	TRUE	563	504	89.1138
F:\25-03-2022\20220324-SAMPLE BROTH-POS-00.d	4391	scanId=2522900		42.0482	421.26	3300.01	2	840.506	117	10613	K.KVPEAVAK.N	KVPEAVAK	DECOY_WP_235727405.1 MULTISPECIES: stage III sporulation protein AE [Lysinibacillus]	118	125	1	840.507	-0.000595377	-0.708354	1	14	0.0714286	188.532	0.0177642	1.01776	FALSE	TRUE	563	505	89.2906
F:\25-03-2022\20220324-SAMPLE BROTH-POS-00.d	3365	scanId=1920673		32.0111	516.231	1754.22	2	1030.45	64	6768.03	R.SIDMHGDTR.H	SIDMHGDTR	DECOY_WP_012292462.1 MULTISPECIES: acetamidase/formamidase family protein [Lysinibacillus]	178	186	0	1030.45	-0.00244164	-2.36949	1	16	0.0625	120.066	0.0177402	1.01774	FALSE	TRUE	563	506	89.3088
F:\25-03-2022\20220324-SAMPLE BROTH-POS-00.d	4584	scanId=2626307		43.7717	465.287	7602.36	2	928.559	223	22525.9	K.VQVQLSKK.N	VQVQLSKK	WP_012295849.1 MULTISPECIES: SAM-dependent methyltransferase [Lysinibacillus]	93	100	1	928.571	-0.011841	-12.7518	1	14	0.0714286	399.321	0.0177272	1.01773	TRUE	FALSE	564	506	89.3088
F:\25-03-2022\20220324-SAMPLE BROTH-POS-00.d	2047	scanId=1134364		18.9059	468.24	625.473	2	934.465	46	3813.03	K.LMNTTAER.V	LMNTTAER	DECOY_WP_012293967.1 MULTISPECIES: sensor histidine kinase [Lysinibacillus]	81	88	0	934.454	0.0105287	11.2672	1	14	0.0714286	67.5922	0.0177267	1.01773	FALSE	TRUE	564	507	89.4853
F:\25-03-2022\20220324-SAMPLE BROTH-POS-00.d	4380	scanId=2516367		41.9393	501.262	1165.23	2	1000.51	42	4059.02	R.VNVGGAEVEK.D	VNVGGAEVEK	DECOY_WP_053592413.1 MULTISPECIES: threonine--tRNA ligase [Lysinibacillus]	28	37	0	1000.52	-0.0099162	-9.91106	1	18	0.0555556	71.4198	0.0175953	1.0176	FALSE	TRUE	564	508	89.6618
F:\25-03-2022\20220324-SAMPLE BROTH-POS-00.d	2883	scanId=1633724		27.2286	566.825	857.166	2	1131.63	37	2475.89	K.VLNQAYLRR.I	VLNQAYLRR	DECOY_WP_012293621.1 MULTISPECIES: site-specific integrase [Lysinibacillus]	42	50	1	1131.65	-0.016424	-14.5133	1	16	0.0625	43.5125	0.0175745	1.01757	FALSE	TRUE	564	509	89.8383
F:\25-03-2022\20220324-SAMPLE BROTH-POS-00.d	2704	scanId=1527674		25.4611	508.253	760.358	2	1014.49	36	2247.51	R.YFTEAKEK.A	YFTEAKEK	DECOY_WP_012293535.1 MULTISPECIES: class 1b ribonucleoside-diphosphate reductase subunit alpha [Lysinibacillus]	187	194	1	1014.5	-0.0106318	-10.4798	1	14	0.0714286	39.4913	0.0175711	1.01757	FALSE	TRUE	564	510	89.8555
F:\25-03-2022\20220324-SAMPLE BROTH-POS-00.d	4602	scanId=2633332		43.8887	436.777	6652.48	2	871.539	114	15080.5	R.KEAVAVKK.L	KEAVAVKK	WP_036161669.1 MULTISPECIES: DNA helicase RecQ [Lysinibacillus]	504	511	2	871.549	-0.0098019	-11.2465	1	14	0.0714286	264.177	0.0175178	1.01752	TRUE	FALSE	565	510	89.8555
F:\25-03-2022\20220324-SAMPLE BROTH-POS-00.d	3706	scanId=2119827		35.3303	600.798	531.256	2	1199.58	31	2131.94	R.SSYPYLVESR.K	SSYPYLVESR	DECOY_WP_227256901.1 MULTISPECIES: hypothetical protein [Lysinibacillus]	212	221	0	1199.58	-0.00102294	-0.852747	1	18	0.0555556	37.3077	0.0174994	1.0175	FALSE	TRUE	565	511	90.0317
F:\25-03-2022\20220324-SAMPLE BROTH-POS-00.d	3810	scanId=2182436		36.3738	1123.02	400.05	2	2244.03	28	1333.5	K.DDLLPALFSSVYDMAFTPDK.R	DDLLPALFSSVYDMAFTPDK	DECOY_WP_012292517.1 MULTISPECIES: PucR family transcriptional regulator [Lysinibacillus]	76	95	0	2244.07	-0.0393693	-17.5437	1	38	0.0263158	23.2727	0.0174523	1.01745	FALSE	TRUE	565	512	90.1547
F:\25-03-2022\20220324-SAMPLE BROTH-POS-00.d	1414	scanId=766713		12.7784	408.22	549.007	2	814.426	39	2547.97	K.GEQPKEK.A	GEQPKEK	DECOY_WP_024363933.1 MULTISPECIES: co-chaperone GroES [Lysinibacillus]	59	65	1	814.418	0.00734774	9.02207	1	12	0.0833333	44.375	0.0174159	1.01742	FALSE	TRUE	565	513	90.1547
F:\25-03-2022\20220324-SAMPLE BROTH-POS-00.d	4551	scanId=2611491		43.5247	562.346	4154.81	2	1122.68	135	10463.2	K.DRRHVITVK.D	DRRHVITVK	DECOY_WP_012292230.1 MULTISPECIES: thioredoxin-disulfide reductase [Lysinibacillus]	138	146	2	1122.66	0.0155142	13.8191	1	16	0.0625	181.844	0.0173794	1.01738	FALSE	TRUE	565	514	90.1547
F:\25-03-2022\20220324-SAMPLE BROTH-POS-00.d	4601	scanId=2632999		43.8832	564.822	11263.9	2	1127.63	172	18959.1	R.IEQALQELGK.K	IEQALQELGK	DECOY_WP_068984762.1 MULTISPECIES: 1-deoxy-D-xylulose-5-phosphate synthase [Lysinibacillus]	608	617	0	1127.62	0.0104646	9.28029	1	18	0.0555556	328.931	0.0173495	1.01735	FALSE	TRUE	565	515	90.1547
F:\25-03-2022\20220324-SAMPLE BROTH-POS-00.d	4498	scanId=2582408		43.04	565.326	2191.16	2	1128.64	78	6101.87	K.GNRATGVVEVK.S	GNRATGVVEVK	DECOY_WP_051563325.1 MULTISPECIES: chemotaxis response regulator protein-glutamate methylesterase [Lysinibacillus]	344	354	1	1128.63	0.0115165	10.204	1	20	0.05	105.302	0.0172574	1.01726	FALSE	TRUE	565	516	90.1547
F:\25-03-2022\20220324-SAMPLE BROTH-POS-00.d	4473	scanId=2568558		42.8092	401.264	2202.26	2	800.513	53	5326.13	K.KLVSNIK.D	KLVSNIK	WP_232901020.1 MULTISPECIES: cell wall-binding protein [Lysinibacillus]	937	943	1	800.512	0.000641048	0.800798	1	12	0.0833333	91.8547	0.017246	1.01725	TRUE	FALSE	566	516	90.1547
F:\25-03-2022\20220324-SAMPLE BROTH-POS-00.d	4389	scanId=2521517		42.0251	542.809	1074.66	2	1083.6	61	5166.73	K.QQQAVLLER.V	QQQAVLLER	DECOY_WP_012293605.1 MULTISPECIES: (d)CMP kinase [Lysinibacillus]	109	117	0	1083.6	0.000506988	0.467872	1	16	0.0625	87.6566	0.0169656	1.01697	FALSE	TRUE	566	517	90.1547
F:\25-03-2022\20220324-SAMPLE BROTH-POS-00.d	1677	scanId=918498		15.3082	293.183	799.447	2	584.352	43	3899.54	K.ELVPK.S	ELVPK	DECOY_WP_036220092.1 MULTISPECIES: assimilatory sulfite reductase (NADPH) flavoprotein subunit [Lysinibacillus]	271	275	0	584.353	-0.000974567	-1.66777	1	8	0.125	66.0018	0.0169255	1.01693	FALSE	TRUE	566	518	90.1547
F:\25-03-2022\20220324-SAMPLE BROTH-POS-00.d	552	scanId=294767		4.91265	505.257	944.705	2	1008.5	57	4672.03	K.ELNMALYR.Q	ELNMALYR	WP_126657807.1 MULTISPECIES: precorrin-6A reductase [Lysinibacillus]	185	192	0	1008.51	-0.00585179	-5.80243	1	14	0.0714286	78.4802	0.0167979	1.0168	TRUE	FALSE	567	518	90.1547
F:\25-03-2022\20220324-SAMPLE BROTH-POS-00.d	2944	scanId=1669794		27.8298	636.837	416.802	2	1271.66	27	1611.34	R.NKLALINEDDK.N	NKLALINEDDK	DECOY_WP_227256876.1 MULTISPECIES: KR domain-containing protein [Lysinibacillus]	598	608	1	1271.67	-0.012319	-9.68726	1	20	0.05	27.0526	0.0167889	1.01679	FALSE	TRUE	567	519	90.1547
F:\25-03-2022\20220324-SAMPLE BROTH-POS-00.d	4192	scanId=2406635		40.1105	644.864	623.087	2	1287.71	50	3314.7	-.M(oxidation of M)KVVETKYFK.G	MKVVETKYFK	DECOY_WP_089985609.1 MULTISPECIES: TIGR01212 family radical SAM protein [Lysinibacillus]	1	10	2	1287.69	0.0231035	17.9418	1	18	0.0555556	55.2404	0.0166653	1.01667	FALSE	TRUE	567	520	90.1547
F:\25-03-2022\20220324-SAMPLE BROTH-POS-00.d	3760	scanId=2152347		35.8723	810.387	539.192	2	1618.76	47	2745.61	-.M(oxidation of M)RGVLGM(oxidation of M)GYREYR.G	MRGVLGMGYREYR	WP_031419892.1 MULTISPECIES: (4Fe-4S)-binding protein [Lysinibacillus]	1	13	2	1618.77	-0.0110725	-6.84006	1	24	0.0416667	45.1571	0.016447	1.01645	TRUE	FALSE	568	520	90.1547
F:\25-03-2022\20220324-SAMPLE BROTH-POS-00.d	4500	scanId=2583792		43.0631	520.794	2048.88	2	1039.57	75	5936.73	K.QVKPGDQLR.L	QVKPGDQLR	WP_036161614.1 MULTISPECIES: 3-hydroxyacyl-ACP dehydratase FabZ [Lysinibacillus]	96	104	0	1039.58	-0.00493394	-4.7461	1	16	0.0625	97.1078	0.0163571	1.01636	TRUE	FALSE	569	520	90.1547
F:\25-03-2022\20220324-SAMPLE BROTH-POS-00.d	1823	scanId=1003345		16.7223	553.782	1002.04	2	1105.55	66	4343.81	R.KYSYLSMSK.T	KYSYLSMSK	WP_012292453.1 MULTISPECIES: VanZ family protein [Lysinibacillus]	33	41	1	1105.55	0.00110455	0.999093	1	16	0.0625	71.0179	0.0163492	1.01635	TRUE	FALSE	570	520	90.1547
F:\25-03-2022\20220324-SAMPLE BROTH-POS-00.d	1477	scanId=802908		13.3817	475.758	926.298	2	949.501	26	1864.71	R.RMLASSGTK.R	RMLASSGTK	WP_036160542.1 MULTISPECIES: GNAT family N-acetyltransferase [Lysinibacillus]	322	330	1	949.502	-0.000173539	-0.182768	1	16	0.0625	30.4495	0.0163293	1.01633	TRUE	FALSE	571	520	90.1547
F:\25-03-2022\20220324-SAMPLE BROTH-POS-00.d	4223	scanId=2424755		40.4124	858.39	909.153	2	1714.77	70	3862.15	K.ENFDKIWDTYQEK.A	ENFDKIWDTYQEK	WP_012293317.1 MULTISPECIES: 4-hydroxy-tetrahydrodipicolinate synthase [Lysinibacillus]	282	294	1	1714.78	-0.0177743	-10.3653	1	24	0.0416667	62.8176	0.0162649	1.01626	TRUE	FALSE	572	520	90.1547
F:\25-03-2022\20220324-SAMPLE BROTH-POS-00.d	4633	scanId=2645403		44.0899	641.881	4631.44	2	1281.75	194	16086.6	K.GKM(oxidation of M)PPQLLLNR.L	GKMPPQLLLNR	DECOY_WP_180276576.1 MULTISPECIES: RNA-binding transcriptional accessory protein [Lysinibacillus]	408	418	1	1281.72	0.0244816	19.1005	1	20	0.05	260.388	0.0161866	1.01619	FALSE	TRUE	572	521	90.1547
F:\25-03-2022\20220324-SAMPLE BROTH-POS-00.d	1033	scanId=550489		9.17468	261.141	1132.96	2	520.268	46	6746.56	R.GTSTR.E	GTSTR	WP_012295274.1 MULTISPECIES: DNA (cytosine-5-)-methyltransferase [Lysinibacillus]	175	179	0	520.261	0.00747147	14.361	1	8	0.125	107.964	0.0160029	1.016	TRUE	FALSE	573	521	90.1547
F:\25-03-2022\20220324-SAMPLE BROTH-POS-00.d	3161	scanId=1799436		29.9905	606.831	770.131	2	1211.65	56	3747.96	K.DNDELLPRIK.E	DNDELLPRIK	DECOY_WP_012295451.1 MULTISPECIES: Holliday junction branch migration protein RuvA [Lysinibacillus]	22	31	1	1211.65	-0.00336793	-2.77962	1	18	0.0555556	59.6452	0.015914	1.01591	FALSE	TRUE	573	522	90.1547
F:\25-03-2022\20220324-SAMPLE BROTH-POS-00.d	3793	scanId=2172184		36.2029	397.25	1109.34	2	792.485	48	4304.3	R.SVLYALK.F	SVLYALK	DECOY_WP_012295964.1 MULTISPECIES: DUF2225 domain-containing protein [Lysinibacillus]	116	122	0	792.475	0.0103973	13.12	1	12	0.0833333	68.3712	0.0158844	1.01588	FALSE	TRUE	573	523	90.1547
F:\25-03-2022\20220324-SAMPLE BROTH-POS-00.d	3854	scanId=2209090		36.818	355.223	1165.02	2	708.431	81	7430.3	K.SSKLFK.E	SSKLFK	WP_031419674.1 MULTISPECIES: DUF3986 family protein [Lysinibacillus]	76	81	1	708.417	0.0140128	19.7805	1	10	0.1	117.108	0.0157608	1.01576	TRUE	FALSE	574	523	90.1547
F:\25-03-2022\20220324-SAMPLE BROTH-POS-00.d	4307	scanId=2472440		41.2072	498.783	1108.28	2	995.552	50	4457.67	K.RGINGPNIR.V	RGINGPNIR	DECOY_WP_012295189.1 MULTISPECIES: flavodoxin-dependent (E)-4-hydroxy-3-methylbut-2-enyl-diphosphate synthase [Lysinibacillus]	261	269	1	995.562	-0.0103869	-10.4332	1	16	0.0625	70.125	0.0157313	1.01573	FALSE	TRUE	574	524	90.1547
F:\25-03-2022\20220324-SAMPLE BROTH-POS-00.d	4729	scanId=2685164		44.7526	562.345	3704.91	2	1122.67	165	12945.9	K.DRRHVITVK.D	DRRHVITVK	DECOY_WP_012292230.1 MULTISPECIES: thioredoxin-disulfide reductase [Lysinibacillus]	138	146	2	1122.66	0.0124523	11.0917	1	16	0.0625	203.11	0.0156891	1.01569	FALSE	TRUE	574	525	90.1547
F:\25-03-2022\20220324-SAMPLE BROTH-POS-00.d	1714	scanId=939444		15.6573	354.17	852.114	2	706.326	29	2063.49	K.DYPNAK.V	DYPNAK	WP_012292024.1 MULTISPECIES: DNA helicase PcrA [Lysinibacillus]	276	281	0	706.329	-0.00301777	-4.27247	1	10	0.1	32.3445	0.0156747	1.01567	TRUE	FALSE	575	525	90.1547
F:\25-03-2022\20220324-SAMPLE BROTH-POS-00.d	3601	scanId=2058261		34.3042	443.264	1471.73	2	884.513	61	5027.34	K.IIGQAEVR.Q	IIGQAEVR	WP_068983117.1 MULTISPECIES: translation initiation factor IF-2 [Lysinibacillus]	665	672	0	884.508	0.00520487	5.88448	1	14	0.0714286	78.6447	0.0156434	1.01564	TRUE	FALSE	576	525	90.1547
F:\25-03-2022\20220324-SAMPLE BROTH-POS-00.d	3246	scanId=1850245		30.8373	528.319	703.446	2	1054.62	46	3773.37	K.ADLLLNIGAR.F	ADLLLNIGAR	WP_036162031.1 MULTISPECIES: biosynthetic-type acetolactate synthase large subunit [Lysinibacillus]	296	305	0	1054.61	0.00904435	8.57599	1	18	0.0555556	58.8942	0.0156079	1.01561	TRUE	FALSE	577	525	90.1547
F:\25-03-2022\20220324-SAMPLE BROTH-POS-00.d	3330	scanId=1899951		31.6657	766.35	422.064	2	1530.69	33	1950.53	R.MKEAGYIDDAQYK.E	MKEAGYIDDAQYK	WP_012295681.1 MULTISPECIES: penicillin-binding protein [Lysinibacillus]	279	291	1	1530.7	-0.017398	-11.366	1	24	0.0416667	30.3158	0.0155423	1.01554	TRUE	FALSE	578	525	90.1547
F:\25-03-2022\20220324-SAMPLE BROTH-POS-00.d	4377	scanId=2514650		41.9107	485.301	1160.95	2	968.588	64	5184.62	K.TAVRGIAGPK.D	TAVRGIAGPK	DECOY_WP_012292172.1 MULTISPECIES: phosphoglycerate dehydrogenase [Lysinibacillus]	57	66	1	968.577	0.0115503	11.925	1	18	0.0555556	80.356	0.0154989	1.0155	FALSE	TRUE	578	526	90.1547
F:\25-03-2022\20220324-SAMPLE BROTH-POS-00.d	3836	scanId=2198725		36.6453	660.369	468.143	2	1318.72	42	2979.41	R.EISKSLTSLEGR.M	EISKSLTSLEGR	WP_069480562.1 MULTISPECIES: BhlA/UviB family holin-like peptide [Lysinibacillus]	62	73	1	1318.71	0.0138752	10.5218	1	22	0.0454545	46.0976	0.015472	1.01547	TRUE	FALSE	579	526	90.1547
F:\25-03-2022\20220324-SAMPLE BROTH-POS-00.d	3557	scanId=2031454		33.8574	679.889	678.356	2	1357.76	60	4151.54	K.GAKGIILITDAMR.A	GAKGIILITDAMR	WP_227256819.1 MULTISPECIES: N-acetylglucosamine-6-phosphate deacetylase [Lysinibacillus]	268	280	1	1357.78	-0.0123423	-9.09011	1	24	0.0416667	63.6816	0.0153393	1.01534	TRUE	FALSE	580	526	90.1547
F:\25-03-2022\20220324-SAMPLE BROTH-POS-00.d	3405	scanId=1943940		32.3989	821.404	324.741	2	1640.79	33	1745.93	K.ANEEINKRQNSNPK.D	ANEEINKRQNSNPK	DECOY_WP_012293009.1 MULTISPECIES: catalase [Lysinibacillus]	674	687	2	1640.82	-0.029581	-18.0282	1	26	0.0384615	26.6667	0.0152736	1.01527	FALSE	TRUE	580	527	90.1547
F:\25-03-2022\20220324-SAMPLE BROTH-POS-00.d	4109	scanId=2359155		39.3191	474.287	894.047	2	946.56	57	5151.46	R.KM(oxidation of M)LLGTLR.N	KMLLGTLR	DECOY_WP_031416242.1 MULTISPECIES: acetolactate synthase small subunit [Lysinibacillus]	148	155	1	946.563	-0.00370962	-3.91905	1	14	0.0714286	78.5602	0.0152501	1.01525	FALSE	TRUE	580	528	90.1547
F:\25-03-2022\20220324-SAMPLE BROTH-POS-00.d	4061	scanId=2331273		38.8544	379.711	3838.06	2	757.407	79	8851.39	K.IGQIGDR.M	IGQIGDR	WP_012292554.1 MULTISPECIES: choice-of-anchor I family protein [Lysinibacillus]	436	442	0	757.408	-0.00146284	-1.93138	1	12	0.0833333	133.541	0.015087	1.01509	TRUE	FALSE	581	528	90.1547
F:\25-03-2022\20220324-SAMPLE BROTH-POS-00.d	2383	scanId=1332969		22.216	475.753	999.406	2	949.491	36	2514.89	R.FELEEKR.K	FELEEKR	WP_036161280.1 MULTISPECIES: ABC transporter ATP-binding protein [Lysinibacillus]	118	124	1	949.487	0.00413284	4.35271	1	12	0.0833333	37.8893	0.015066	1.01507	TRUE	FALSE	582	528	90.1547
F:\25-03-2022\20220324-SAMPLE BROTH-POS-00.d	2324	scanId=1299170		21.6527	358.209	772.255	2	714.403	34	2061.8	M.ARAELR.Y	ARAELR	WP_206701073.1 LytTR family DNA-binding domain-containing protein [Lysinibacillus fusiformis]	2	7	1	714.414	-0.0103307	-14.4604	1	10	0.1	31.0274	0.0150487	1.01505	TRUE	FALSE	583	528	90.1547
F:\25-03-2022\20220324-SAMPLE BROTH-POS-00.d	3528	scanId=2015323		33.5886	644.338	949.129	2	1286.66	73	5172.38	R.AIEEVIDEEIK.I	AIEEVIDEEIK	DECOY_WP_012295578.1 MULTISPECIES: phenylalanine--tRNA ligase subunit beta [Lysinibacillus]	333	343	0	1286.66	0.00147187	1.14395	1	20	0.05	76.9066	0.0148687	1.01487	FALSE	TRUE	583	529	90.3254
F:\25-03-2022\20220324-SAMPLE BROTH-POS-00.d	4407	scanId=2531818		42.1968	431.727	1450.87	2	861.439	50	4484.55	K.VTQHYSK.E	VTQHYSK	DECOY_WP_107922374.1 MULTISPECIES: leucine--tRNA ligase [Lysinibacillus]	145	151	0	861.434	0.00459134	5.32988	1	12	0.0833333	66.6067	0.0148525	1.01485	FALSE	TRUE	583	530	90.3412
F:\25-03-2022\20220324-SAMPLE BROTH-POS-00.d	5225	scanId=2963483		49.3912	978.94	814.08	2	1955.86	76	5325.25	K.VEHYESFSDFDELIAR.A	VEHYESFSDFDELIAR	WP_012295643.1 MULTISPECIES: tRNA 4-thiouridine(8) synthase ThiI [Lysinibacillus]	363	378	0	1955.89	-0.0252737	-12.9218	1	30	0.0333333	78.2552	0.0146951	1.0147	TRUE	FALSE	584	530	90.3412
F:\25-03-2022\20220324-SAMPLE BROTH-POS-00.d	1299	scanId=701291		11.6881	451.233	619.174	2	900.451	33	2055.27	K.LYEASYR.E	LYEASYR	DECOY_WP_031418249.1 MULTISPECIES: YheE family protein [Lysinibacillus]	34	40	0	900.434	0.0168732	18.739	1	12	0.0833333	30.0074	0.0146002	1.0146	FALSE	TRUE	584	531	90.3726
F:\25-03-2022\20220324-SAMPLE BROTH-POS-00.d	3414	scanId=1948872		32.4811	643.803	747.021	2	1285.59	47	3763.2	K.EGQAHQDM(oxidation of M)INK.T	EGQAHQDMINK	DECOY_WP_230591252.1 MULTISPECIES: YdcF family protein [Lysinibacillus]	79	89	0	1285.57	0.019262	14.9832	1	20	0.05	54.4142	0.0144596	1.01446	FALSE	TRUE	584	532	90.3726
F:\25-03-2022\20220324-SAMPLE BROTH-POS-00.d	1837	scanId=1011379		16.8562	672.83	1112.99	2	1343.65	61	4292	R.LYLESMQEGFK.V	LYLESMQEGFK	WP_012293805.1 MULTISPECIES: dynamin family protein [Lysinibacillus]	360	370	0	1343.64	0.0030525	2.27181	1	20	0.05	61.0142	0.0142158	1.01422	TRUE	FALSE	585	532	90.3726
F:\25-03-2022\20220324-SAMPLE BROTH-POS-00.d	4631	scanId=2644738		44.0788	458.788	5737.92	2	915.561	138	14011.1	R.KLETKAAR.F	KLETKAAR	WP_036160521.1 MULTISPECIES: Dam family site-specific DNA-(adenine-N6)-methyltransferase [Lysinibacillus]	102	109	2	915.55	0.0105364	11.5083	1	14	0.0714286	197.557	0.0141001	1.0141	TRUE	FALSE	586	532	90.3726
F:\25-03-2022\20220324-SAMPLE BROTH-POS-00.d	3066	scanId=1742814		29.0468	529.795	862.81	2	1057.58	42	2866.62	K.GQLGSDQILK.G	GQLGSDQILK	DECOY_WP_012295816.1 MULTISPECIES: UDP-N-acetylmuramate dehydrogenase [Lysinibacillus]	59	68	0	1057.58	-0.000620018	-0.586263	1	18	0.0555556	40.2367	0.0140363	1.01404	FALSE	TRUE	586	533	90.5425
F:\25-03-2022\20220324-SAMPLE BROTH-POS-00.d	2190	scanId=1217867		20.2977	316.195	1292.96	2	630.375	68	14114.5	K.ISINGK.K	ISINGK	DECOY_WP_012295110.1 MULTISPECIES: hypothetical protein [Lysinibacillus]	70	75	0	630.37	0.00499157	7.91848	1	10	0.1	196.048	0.0138898	1.01389	FALSE	TRUE	586	534	90.5578
F:\25-03-2022\20220324-SAMPLE BROTH-POS-00.d	4357	scanId=2503183		41.7196	545.288	1052.38	2	1088.56	39	3312.71	M.FTIPEAQQR.L	FTIPEAQQR	WP_012292243.1 MULTISPECIES: central glycolytic genes regulator [Lysinibacillus]	2	10	0	1088.56	0.000334206	0.307017	1	16	0.0625	45.45	0.0137199	1.01372	TRUE	FALSE	587	534	90.5578
F:\25-03-2022\20220324-SAMPLE BROTH-POS-00.d	2977	scanId=1689631		28.1604	617.838	407.755	2	1233.66	29	2060.58	K.M(oxidation of M)STVVPKTLDK.V	MSTVVPKTLDK	DECOY_WP_053594800.1 heme uptake protein IsdC [Lysinibacillus agricola]	95	105	1	1233.66	-0.00302548	-2.45243	1	20	0.05	28.25	0.0137097	1.01371	FALSE	TRUE	587	535	90.5884
F:\25-03-2022\20220324-SAMPLE BROTH-POS-00.d	4439	scanId=2549696		42.4948	564.818	989.782	2	1127.62	49	3362.58	R.AIPLTMAAVGGK.S	AIPLTMAAVGGK	DECOY_WP_012293640.1 MULTISPECIES: 3-hydroxyacyl-CoA dehydrogenase [Lysinibacillus]	81	92	0	1127.64	-0.0165559	-14.682	1	22	0.0454545	45.7818	0.0136151	1.01362	FALSE	TRUE	587	536	90.5884
F:\25-03-2022\20220324-SAMPLE BROTH-POS-00.d	4422	scanId=2540448		42.3407	518.319	3707.29	2	1034.62	108	8618.49	K.ETLIIKYR.T	ETLIIKYR	WP_012291831.1 MULTISPECIES: DNA replication/repair protein RecF [Lysinibacillus]	219	226	1	1034.61	0.0105857	10.2316	1	14	0.0714286	116.819	0.0135545	1.01355	TRUE	FALSE	588	536	90.5884
F:\25-03-2022\20220324-SAMPLE BROTH-POS-00.d	3057	scanId=1737495		28.9581	513.747	589.104	2	1025.48	31	2745.74	R.ELQNEHEK.L	ELQNEHEK	WP_012293147.1 MULTISPECIES: transcriptional regulator [Lysinibacillus]	104	111	0	1025.48	0.00130678	1.27432	1	14	0.0714286	36.45	0.0132751	1.01328	TRUE	FALSE	589	536	90.5884
F:\25-03-2022\20220324-SAMPLE BROTH-POS-00.d	3729	scanId=2133460		35.5575	507.803	755.026	2	1013.59	48	4048.81	K.RHLVFQSK.S	RHLVFQSK	DECOY_WP_051563314.1 MULTISPECIES: GNAT family N-acetyltransferase [Lysinibacillus]	3	10	1	1013.58	0.0141469	13.9574	1	14	0.0714286	53.4815	0.0132092	1.01321	FALSE	TRUE	589	537	90.6312
F:\25-03-2022\20220324-SAMPLE BROTH-POS-00.d	1473	scanId=800692		13.3447	359.713	883.837	2	717.412	66	8950.83	K.EWKKK.E	EWKKK	DECOY_WP_012296028.1 MULTISPECIES: DUF4179 domain-containing protein [Lysinibacillus]	336	340	2	717.417	-0.0055887	-7.79003	1	8	0.125	117.76	0.0131563	1.01316	FALSE	TRUE	589	538	90.6312
F:\25-03-2022\20220324-SAMPLE BROTH-POS-00.d	4386	scanId=2519801		41.9965	540.829	1292.16	2	1079.64	58	5170.48	-.MSKHPLLVR.D	MSKHPLLVR	WP_012293877.1 MULTISPECIES: PucR family transcriptional regulator [Lysinibacillus]	1	9	1	1079.63	0.015288	14.1605	1	16	0.0625	67.0086	0.0129598	1.01296	TRUE	FALSE	590	538	90.6312
F:\25-03-2022\20220324-SAMPLE BROTH-POS-00.d	4146	scanId=2379652		39.6607	719.388	437.35	2	1436.76	46	2987.03	K.VNAKFPERASYR.T	VNAKFPERASYR	DECOY_WP_217581450.1 MULTISPECIES: SagB/ThcOx family dehydrogenase [Lysinibacillus]	166	177	2	1436.75	0.00890003	6.19454	1	22	0.0454545	38.3491	0.0128385	1.01284	FALSE	TRUE	590	539	90.6312
F:\25-03-2022\20220324-SAMPLE BROTH-POS-00.d	4752	scanId=2697979		44.9662	643.406	3808.76	2	1284.8	175	13713.3	K.GIGSVGGTVVAIKK.-	GIGSVGGTVVAIKK	DECOY_WP_012292132.1 MULTISPECIES: SDR family oxidoreductase [Lysinibacillus]	256	269	1	1284.78	0.020374	15.858	1	26	0.0384615	176.039	0.0128371	1.01284	FALSE	TRUE	590	540	90.6312
F:\25-03-2022\20220324-SAMPLE BROTH-POS-00.d	4725	scanId=2683234		44.7204	612.881	3035.88	2	1223.75	215	19198.2	K.ALEEIIPALKK.Q	ALEEIIPALKK	WP_031416614.1 MULTISPECIES: polysaccharide deacetylase family protein [Lysinibacillus]	213	223	1	1223.75	-0.000845391	-0.690821	1	20	0.05	246.118	0.0128199	1.01282	TRUE	FALSE	591	540	90.6312
F:\25-03-2022\20220324-SAMPLE BROTH-POS-00.d	4546	scanId=2609109		43.485	414.763	2913.13	2	827.511	91	10189	K.GILERIK.G	GILERIK	DECOY_WP_012294209.1 MULTISPECIES: Cof-type HAD-IIB family hydrolase [Lysinibacillus]	24	30	1	827.523	-0.0115296	-13.9327	1	12	0.0833333	129.877	0.0127467	1.01275	FALSE	TRUE	591	541	90.6312
F:\25-03-2022\20220324-SAMPLE BROTH-POS-00.d	5619	scanId=3166058		52.7675	578.354	1293.31	2	1154.69	120	9353.15	M.NIPNKITISR.I	NIPNKITISR	WP_031419015.1 MULTISPECIES: CDP-diacylglycerol--glycerol-3-phosphate 3-phosphatidyltransferase [Lysinibacillus]	2	11	1	1154.68	0.0161238	13.9639	1	18	0.0555556	117.042	0.0125136	1.01251	TRUE	FALSE	592	541	90.6312
F:\25-03-2022\20220324-SAMPLE BROTH-POS-00.d	1207	scanId=650612		10.8434	394.717	497.072	2	787.42	25	2278.92	R.LQSGEVR.L	LQSGEVR	WP_008181913.1 MULTISPECIES: 50S ribosomal protein L2 [Lysinibacillus]	176	182	0	787.419	0.000708015	0.89916	1	12	0.0833333	28.3266	0.0124299	1.01243	TRUE	FALSE	593	541	90.6312
F:\25-03-2022\20220324-SAMPLE BROTH-POS-00.d	3903	scanId=2238563		37.3092	937.968	631.191	2	1873.92	34	2583.61	R.HNNGAPALGLEGAHSHHR.I	HNNGAPALGLEGAHSHHR	WP_012295776.1 MULTISPECIES: L-aspartate oxidase [Lysinibacillus]	103	120	0	1873.9	0.0165541	8.83399	1	34	0.0294118	31.9205	0.012355	1.01236	TRUE	FALSE	594	541	90.6312
F:\25-03-2022\20220324-SAMPLE BROTH-POS-00.d	1389	scanId=753019		12.5502	526.267	628.717	2	1050.52	69	9907.18	R.KYQEQLDK.R	KYQEQLDK	DECOY_WP_012291949.1 MULTISPECIES: DUF4132 domain-containing protein [Lysinibacillus]	341	348	1	1050.53	-0.0143912	-13.699	1	14	0.0714286	122.191	0.0123335	1.01233	FALSE	TRUE	594	542	90.6312
F:\25-03-2022\20220324-SAMPLE BROTH-POS-00.d	1620	scanId=885015		14.7501	547.273	550.905	2	1092.53	27	2116.48	K.AIMKSMQER.T	AIMKSMQER	DECOY_WP_036162156.1 MULTISPECIES: S-layer homology domain-containing protein [Lysinibacillus]	331	339	1	1092.54	-0.0108003	-9.88552	1	16	0.0625	26.0947	0.0123293	1.01233	FALSE	TRUE	594	543	90.6312
F:\25-03-2022\20220324-SAMPLE BROTH-POS-00.d	4426	scanId=2542497		42.3748	523.278	2403.61	2	1044.54	45	5073.72	R.LTGGGEVASVR.A	LTGGGEVASVR	DECOY_WP_031416167.1 MULTISPECIES: molybdopterin-guanine dinucleotide biosynthesis protein B [Lysinibacillus]	99	109	0	1044.56	-0.0150497	-14.4077	1	20	0.05	62.4573	0.01231	1.01231	FALSE	TRUE	594	544	90.6312
F:\25-03-2022\20220324-SAMPLE BROTH-POS-00.d	1400	scanId=759116		12.6518	416.206	364.846	2	830.397	35	2289.64	K.EANLPC[carbamidomethylation of C]K.V	EANLPCK	WP_036161318.1 MULTISPECIES: response regulator transcription factor [Lysinibacillus]	71	77	0	830.396	0.000894028	1.07663	1	12	0.0833333	28.125	0.0122836	1.01228	TRUE	FALSE	595	544	90.6312
F:\25-03-2022\20220324-SAMPLE BROTH-POS-00.d	4474	scanId=2568891		42.8147	567.298	792.364	2	1132.58	48	3255.62	K.IEKMERAEK.L	IEKMERAEK	DECOY_WP_227256911.1 MULTISPECIES: flagellar assembly protein FliH [Lysinibacillus]	77	85	2	1132.59	-0.00902019	-7.9642	1	16	0.0625	39.69	0.0121912	1.01219	FALSE	TRUE	595	545	90.6312
F:\25-03-2022\20220324-SAMPLE BROTH-POS-00.d	4281	scanId=2457682		40.9612	501.259	1474.93	2	1000.5	52	4550.24	K.SIGYYSRR.E	SIGYYSRR	DECOY_WP_036161697.1 MULTISPECIES: nitroreductase family protein [Lysinibacillus]	182	189	1	1000.51	-0.00598813	-5.98508	1	14	0.0714286	55.3353	0.012161	1.01216	FALSE	TRUE	595	546	90.6312
F:\25-03-2022\20220324-SAMPLE BROTH-POS-00.d	4065	scanId=2333322		38.8886	360.207	1999.76	2	718.4	40	3593.11	K.M(oxidation of M)IAGALK.L	MIAGALK	WP_012293669.1 MULTISPECIES: 5'-nucleotidase C-terminal domain-containing protein [Lysinibacillus]	76	82	0	718.405	-0.00489151	-6.80885	1	12	0.0833333	43.4803	0.012101	1.0121	TRUE	FALSE	596	546	90.6312
F:\25-03-2022\20220324-SAMPLE BROTH-POS-00.d	1618	scanId=883630		14.727	490.748	533.004	2	979.481	39	3238.37	R.EMPFTISR.V	EMPFTISR	WP_012292938.1 MULTISPECIES: helicase-exonuclease AddAB subunit AddA [Lysinibacillus]	1143	1150	0	979.48	0.000979253	0.999768	1	14	0.0714286	39.05	0.0120586	1.01206	TRUE	FALSE	597	546	90.6312
F:\25-03-2022\20220324-SAMPLE BROTH-POS-00.d	3638	scanId=2080540		34.6755	333.208	2038.11	2	664.402	74	7514.85	R.IGYKGK.I	IGYKGK	DECOY_WP_036160686.1 MULTISPECIES: acyl-CoA dehydrogenase family protein [Lysinibacillus]	195	200	1	664.391	0.0108197	16.2852	1	10	0.1	90.3991	0.0120294	1.01203	FALSE	TRUE	597	547	90.6312
F:\25-03-2022\20220324-SAMPLE BROTH-POS-00.d	3892	scanId=2231140		37.1855	741.897	714.063	2	1481.78	29	1900.98	R.GQTPSVDIEPIGAAK.N	GQTPSVDIEPIGAAK	DECOY_WP_031418045.1 MULTISPECIES: O-methyltransferase [Lysinibacillus]	176	190	0	1481.77	0.00595959	4.02193	1	28	0.0357143	22.6875	0.0119346	1.01193	FALSE	TRUE	597	548	90.6312
F:\25-03-2022\20220324-SAMPLE BROTH-POS-00.d	4084	scanId=2344728		39.0787	379.71	2707.98	2	757.406	57	6508.2	K.IGQIGDR.M	IGQIGDR	WP_012292554.1 MULTISPECIES: choice-of-anchor I family protein [Lysinibacillus]	436	442	0	757.408	-0.00184153	-2.43135	1	12	0.0833333	76.7423	0.0117916	1.01179	TRUE	FALSE	598	548	90.6312
F:\25-03-2022\20220324-SAMPLE BROTH-POS-00.d	4507	scanId=2587559		43.1258	564.821	2888.78	2	1127.63	89	6818.21	R.SVIVELDTPR.H	SVIVELDTPR	WP_031416357.1 MULTISPECIES: bifunctional homocysteine S-methyltransferase/methylenetetrahydrofolate reductase [Lysinibacillus]	321	330	0	1127.62	0.00976989	8.66418	1	18	0.0555556	78.7784	0.0115541	1.01155	TRUE	FALSE	599	548	90.6312
F:\25-03-2022\20220324-SAMPLE BROTH-POS-00.d	4366	scanId=2508500		41.8082	540.331	1318.08	2	1078.65	70	4997.08	K.QGLIHAVTLK.R	QGLIHAVTLK	WP_036161284.1 MULTISPECIES: toxic anion resistance protein [Lysinibacillus]	287	296	0	1078.65	-0.0028874	-2.67687	1	18	0.0555556	57.6801	0.0115428	1.01154	TRUE	FALSE	600	548	90.6312
F:\25-03-2022\20220324-SAMPLE BROTH-POS-00.d	3736	scanId=2137559		35.6258	492.285	841.568	2	982.555	40	2857.22	R.QVVPGDQLK.L	QVVPGDQLK	WP_031418516.1 MULTISPECIES: 3-hydroxyacyl-ACP dehydratase FabZ [Lysinibacillus]	96	104	0	982.545	0.0102121	10.3936	1	16	0.0625	32.805	0.0114814	1.01148	TRUE	FALSE	601	548	90.6312
F:\25-03-2022\20220324-SAMPLE BROTH-POS-00.d	3490	scanId=1994312		33.2384	353.222	1507.96	2	704.429	46	5164.51	K.KLAM(oxidation of M)VK.A	KLAMVK	DECOY_WP_036162045.1 MULTISPECIES: S8 family serine peptidase [Lysinibacillus]	311	316	1	704.425	0.00318848	4.52635	1	10	0.1	59.2404	0.0114707	1.01147	FALSE	TRUE	601	549	90.6312
F:\25-03-2022\20220324-SAMPLE BROTH-POS-00.d	5305	scanId=3004597		50.0765	878.021	891.789	2	1754.03	80	4981.15	K.HGALKGFILTITRISK.C	HGALKGFILTITRISK	WP_008180348.1 MULTISPECIES: membrane protein insertion efficiency factor YidD [Lysinibacillus]	41	56	2	1754.06	-0.0294232	-16.7744	1	30	0.0333333	57.0909	0.0114614	1.01146	TRUE	FALSE	602	549	90.6312
F:\25-03-2022\20220324-SAMPLE BROTH-POS-00.d	4765	scanId=2705899		45.0982	798.001	3954.68	2	1593.99	227	19221.9	M.QNKKVVLIVVDALR.F	QNKKVVLIVVDALR	WP_012293346.1 MULTISPECIES: alkaline phosphatase family protein [Lysinibacillus]	2	15	2	1593.99	-0.005905	-3.70454	1	26	0.0384615	219.82	0.0114359	1.01144	TRUE	FALSE	603	549	90.6312
F:\25-03-2022\20220324-SAMPLE BROTH-POS-00.d	2906	scanId=1647409		27.4567	536.291	930.631	2	1070.57	42	3701.84	K.LVLQENEAR.T	LVLQENEAR	DECOY_WP_012292711.1 MULTISPECIES: PBP1A family penicillin-binding protein [Lysinibacillus]	428	436	0	1070.57	-0.00388112	-3.62528	1	16	0.0625	42.037	0.0113557	1.01136	FALSE	TRUE	603	550	90.7963
F:\25-03-2022\20220324-SAMPLE BROTH-POS-00.d	1509	scanId=821976		13.6995	286.175	1122.01	2	570.336	49	5978.67	K.WPIR.R	WPIR	DECOY_WP_217581760.1 MULTISPECIES: cysteine protease StiP family protein [Lysinibacillus]	45	48	0	570.328	0.00805185	14.1179	1	6	0.166667	67.8099	0.011342	1.01134	FALSE	TRUE	603	551	90.9614
F:\25-03-2022\20220324-SAMPLE BROTH-POS-00.d	4518	scanId=2594094		43.2348	748.893	1366.14	2	1495.77	73	4900.79	K.EKQQLNPLELER.F	EKQQLNPLELER	DECOY_WP_012292052.1 MULTISPECIES: sporulation protein YhbH [Lysinibacillus]	241	252	1	1495.8	-0.0281326	-18.8077	1	22	0.0454545	55.225	0.0112686	1.01127	FALSE	TRUE	603	552	90.981
F:\25-03-2022\20220324-SAMPLE BROTH-POS-00.d	4236	scanId=2432841		40.5472	401.723	2750.35	2	801.431	80	7270.51	K.ASLENIR.N	ASLENIR	DECOY_WP_012293388.1 MULTISPECIES: DUF896 domain-containing protein [Lysinibacillus]	64	70	0	801.434	-0.00299089	-3.73192	1	12	0.0833333	81.6713	0.0112332	1.01123	FALSE	TRUE	603	553	90.981
F:\25-03-2022\20220324-SAMPLE BROTH-POS-00.d	2991	scanId=1698051		28.3007	664.314	1120.83	2	1326.61	42	2775.38	R.FAAPFATWM(oxidation of M)NR.E	FAAPFATWMNR	WP_036160877.1 MULTISPECIES: Ppx/GppA family phosphatase [Lysinibacillus]	422	432	0	1326.62	-0.00357632	-2.69582	1	20	0.05	30.15	0.0108634	1.01086	TRUE	FALSE	604	553	90.981
F:\25-03-2022\20220324-SAMPLE BROTH-POS-00.d	4301	scanId=2469725		41.1619	377.234	1308.08	2	752.454	84	9303.27	R.YKTKLT.-	YKTKLT	DECOY_WP_012294099.1 MULTISPECIES: HAMP domain-containing histidine kinase [Lysinibacillus]	324	329	2	752.443	0.0107035	14.225	1	10	0.1	100.442	0.0107965	1.0108	FALSE	TRUE	604	554	90.981
F:\25-03-2022\20220324-SAMPLE BROTH-POS-00.d	5605	scanId=3158294		52.6381	611.296	1654.39	2	1220.58	136	11858	K.AGVVLDM(oxidation of M)AGGMGK.V	AGVVLDMAGGMGK	DECOY_WP_012292566.1 MULTISPECIES: 3-oxoacid CoA-transferase subunit B [Lysinibacillus]	79	91	0	1220.59	-0.0115756	-9.48362	1	24	0.0416667	127.074	0.0107163	1.01072	FALSE	TRUE	604	555	90.981
F:\25-03-2022\20220324-SAMPLE BROTH-POS-00.d	4311	scanId=2475208		41.2533	496.303	2038.87	2	990.591	65	5985.25	K.VKSFNRIK.E	VKSFNRIK	WP_227665385.1 MULTISPECIES: HAMP domain-containing histidine kinase [Lysinibacillus]	404	411	2	990.597	-0.00684122	-6.90615	1	14	0.0714286	64.0016	0.0106932	1.01069	TRUE	FALSE	605	555	90.981
F:\25-03-2022\20220324-SAMPLE BROTH-POS-00.d	3018	scanId=1713284		28.5546	470.784	1261.44	2	939.553	41	3905.82	K.TLRTKHGK.Q	TLRTKHGK	WP_036075052.1 MULTISPECIES: phage baseplate assembly protein V [Lysinibacillus]	414	421	2	939.561	-0.00823159	-8.7611	1	14	0.0714286	41.75	0.0106892	1.01069	TRUE	FALSE	606	555	90.981
F:\25-03-2022\20220324-SAMPLE BROTH-POS-00.d	3378	scanId=1928592		32.1431	508.747	1598.08	2	1015.48	43	5336.34	R.GMYLFETR.Y	GMYLFETR	DECOY_WP_031419728.1 MULTISPECIES: phosphoenolpyruvate--protein phosphotransferase [Lysinibacillus]	269	276	0	1015.48	5.57473e-05	0.0548975	1	14	0.0714286	56.875	0.010658	1.01066	FALSE	TRUE	606	556	90.981
F:\25-03-2022\20220324-SAMPLE BROTH-POS-00.d	1420	scanId=770480		12.8412	697.31	407.205	2	1392.6	14	844.624	R.LPQPYEEEM(oxidation of M)NK.I	LPQPYEEEMNK	DECOY_WP_012295645.1 MULTISPECIES: GNAT family N-acetyltransferase [Lysinibacillus]	41	51	0	1392.62	-0.0184879	-13.2756	1	20	0.05	9	0.0106556	1.01066	FALSE	TRUE	606	557	90.981
F:\25-03-2022\20220324-SAMPLE BROTH-POS-00.d	4273	scanId=2453251		40.8874	520.794	1463.57	2	1039.57	61	4882.47	K.LTRMNHLR.D	LTRMNHLR	DECOY_WP_012295425.1 MULTISPECIES: bifunctional (p)ppGpp synthetase/guanosine-3',5'-bis(diphosphate) 3'-pyrophosphohydrolase [Lysinibacillus]	581	588	1	1039.57	0.00153882	1.48025	1	14	0.0714286	52.0032	0.010651	1.01065	FALSE	TRUE	606	558	90.981
F:\25-03-2022\20220324-SAMPLE BROTH-POS-00.d	2871	scanId=1627408		27.1233	608.345	424.744	2	1214.68	49	3499.15	K.AQIVPAAYVGAR.N	AQIVPAAYVGAR	WP_206701050.1 MULTISPECIES: 1-acyl-sn-glycerol-3-phosphate acyltransferase [Lysinibacillus]	120	131	0	1214.68	-0.00171124	-1.4088	1	22	0.0454545	37.1607	0.0106199	1.01062	TRUE	FALSE	607	558	90.981
F:\25-03-2022\20220324-SAMPLE BROTH-POS-00.d	4535	scanId=2603293		43.3881	553.26	2341.25	2	1104.5	104	8376.76	R.HFQKM(oxidation of M)NER.T	HFQKMNER	WP_036119560.1 MULTISPECIES: DRTGG domain-containing protein [Lysinibacillus]	212	219	1	1104.51	-0.0086133	-7.79827	1	14	0.0714286	88.8443	0.0106061	1.01061	TRUE	FALSE	608	558	90.981
F:\25-03-2022\20220324-SAMPLE BROTH-POS-00.d	3855	scanId=2209423		36.8236	346.71	1119.38	2	691.404	48	3889.3	K.VIHPAR.I	VIHPAR	DECOY_WP_012291842.1 MULTISPECIES: pyridoxal 5'-phosphate synthase glutaminase subunit PdxT [Lysinibacillus]	50	55	0	691.413	-0.00849085	-12.2804	1	10	0.1	41.1667	0.0105846	1.01058	FALSE	TRUE	608	559	90.981
F:\25-03-2022\20220324-SAMPLE BROTH-POS-00.d	1441	scanId=782176		13.0361	380.709	642.196	2	759.404	33	4553.72	K.ATINWR.M	ATINWR	WP_012295287.1 MULTISPECIES: phage major tail tube protein [Lysinibacillus]	61	66	0	759.403	0.00164705	2.16887	1	10	0.1	48.0863	0.0105598	1.01056	TRUE	FALSE	609	559	90.981
F:\25-03-2022\20220324-SAMPLE BROTH-POS-00.d	2539	scanId=1429325		23.822	518.253	439.69	2	1034.49	43	2700.99	K.WYKYQTF.-	WYKYQTF	DECOY_WP_036162165.1 MULTISPECIES: spore coat associated protein CotJA [Lysinibacillus]	68	74	1	1034.49	0.00505678	4.88821	1	12	0.0833333	27.3906	0.010141	1.01014	FALSE	TRUE	609	560	90.981
F:\25-03-2022\20220324-SAMPLE BROTH-POS-00.d	4712	scanId=2676841		44.6139	848.511	3427.19	2	1695.01	255	17036.4	K.GPKLQAHINHLLNLK.Q	GPKLQAHINHLLNLK	DECOY_WP_012294047.1 MULTISPECIES: class I SAM-dependent methyltransferase [Lysinibacillus]	86	100	1	1694.99	0.0132742	7.8314	1	28	0.0357143	172.618	0.0101323	1.01013	FALSE	TRUE	609	561	90.981
F:\25-03-2022\20220324-SAMPLE BROTH-POS-00.d	4741	scanId=2691471		44.8577	606.373	3595.25	2	1210.73	163	13142.2	R.LKQFPPKPEK.D	LKQFPPKPEK	WP_012292053.1 MULTISPECIES: SpoVR family protein [Lysinibacillus]	207	216	1	1210.71	0.0236833	19.5615	1	18	0.0555556	133.001	0.0101202	1.01012	TRUE	FALSE	610	561	90.981
F:\25-03-2022\20220324-SAMPLE BROTH-POS-00.d	4484	scanId=2574374		42.9061	509.805	1245.08	2	1017.59	58	4086.55	K.FLNALAEIK.M	FLNALAEIK	WP_012293257.1 MULTISPECIES: GTP-sensing pleiotropic transcriptional regulator CodY [Lysinibacillus]	249	257	0	1017.59	0.00887914	8.72569	1	16	0.0625	41.2893	0.0101037	1.0101	TRUE	FALSE	611	561	90.981
F:\25-03-2022\20220324-SAMPLE BROTH-POS-00.d	4319	scanId=2480025		41.3336	552.288	1604.74	2	1102.56	37	2400.84	R.TRITAEPC[carbamidomethylation of C]R.V	TRITAEPCR	DECOY_WP_227256803.1 MULTISPECIES: sigma-70 family RNA polymerase sigma factor [Lysinibacillus]	28	36	1	1102.56	0.00672092	6.09576	1	16	0.0625	24.2222	0.0100891	1.01009	FALSE	TRUE	611	562	90.981
F:\25-03-2022\20220324-SAMPLE BROTH-POS-00.d	4483	scanId=2574041		42.9006	564.823	1386.89	2	1127.63	50	4172.83	M.PRTQALRMR.C	PRTQALRMR	DECOY_WP_012293453.1 MULTISPECIES: hypothetical protein [Lysinibacillus]	2	10	2	1127.63	-0.00304153	-2.69727	1	16	0.0625	42.0417	0.0100751	1.01008	FALSE	TRUE	611	563	90.981
F:\25-03-2022\20220324-SAMPLE BROTH-POS-00.d	4363	scanId=2506616		41.7768	542.809	1202.69	2	1083.6	46	4891.96	R.M(oxidation of M)LIDHLKAK.D	MLIDHLKAK	WP_012296155.1 MULTISPECIES: malate:quinone oxidoreductase [Lysinibacillus]	190	198	1	1083.61	-0.00754248	-6.9605	1	16	0.0625	49.0019	0.0100168	1.01002	TRUE	FALSE	612	563	90.981
F:\25-03-2022\20220324-SAMPLE BROTH-POS-00.d	3563	scanId=2034888		33.9147	771.846	918.931	2	1541.68	55	3272.46	-.MFMGEYQHSVDAK.G	MFMGEYQHSVDAK	WP_010858326.1 MULTISPECIES: division/cell wall cluster transcriptional repressor MraZ [Lysinibacillus]	1	13	0	1541.66	0.013356	8.66335	1	24	0.0416667	32.0625	0.00979769	1.0098	TRUE	FALSE	613	563	90.981
F:\25-03-2022\20220324-SAMPLE BROTH-POS-00.d	4829	scanId=2743348		45.7223	539.845	6053.05	2	1077.67	297	40582.7	R.KNKTIAYLK.E	KNKTIAYLK	WP_036162416.1 MULTISPECIES: DUF4272 domain-containing protein [Lysinibacillus]	177	185	2	1077.65	0.0202892	18.8272	1	16	0.0625	396.72	0.0097756	1.00978	TRUE	FALSE	614	563	90.981
F:\25-03-2022\20220324-SAMPLE BROTH-POS-00.d	4648	scanId=2651836		44.1971	489.315	9210.7	2	976.615	269	33029.4	K.EKYALLLK.M	EKYALLLK	WP_036161618.1 MULTISPECIES: MATE family efflux transporter [Lysinibacillus]	9	16	1	976.596	0.0191476	19.6065	1	14	0.0714286	322.573	0.00976623	1.00977	TRUE	FALSE	615	563	90.981
F:\25-03-2022\20220324-SAMPLE BROTH-POS-00.d	3382	scanId=1930808		32.18	712.821	544.121	2	1423.63	46	3180.49	-.M(oxidation of M)TETTGWKNNAR.N	MTETTGWKNNAR	WP_031415896.1 MULTISPECIES: diphthine--ammonia ligase [Lysinibacillus]	1	12	1	1423.65	-0.0238811	-16.7745	1	22	0.0454545	31.0139	0.0097513	1.00975	TRUE	FALSE	616	563	90.981
F:\25-03-2022\20220324-SAMPLE BROTH-POS-00.d	6048	scanId=3385950		56.4324	619.379	975.322	2	1236.74	102	7401.14	K.VVPWIAIRQR.A	VVPWIAIRQR	DECOY_WP_036162695.1 MULTISPECIES: multidrug effflux MFS transporter [Lysinibacillus]	192	201	1	1236.75	-0.00165028	-1.33437	1	18	0.0555556	71.7696	0.0096971	1.0097	FALSE	TRUE	616	564	91.1426
F:\25-03-2022\20220324-SAMPLE BROTH-POS-00.d	4898	scanId=2783525		46.392	671.923	3144.3	2	1341.83	183	16562.7	K.IPHMPIPLIIAK.E	IPHMPIPLIIAK	DECOY_WP_012292894.1 MULTISPECIES: ComF family protein [Lysinibacillus]	99	110	0	1341.82	0.00983815	7.33194	1	22	0.0454545	159.377	0.00962263	1.00962	FALSE	TRUE	616	565	91.2636
F:\25-03-2022\20220324-SAMPLE BROTH-POS-00.d	1841	scanId=1013763		16.8959	435.76	1198.8	2	869.506	62	5423.86	K.ANQVVAIR.A	ANQVVAIR	DECOY_WP_012292174.1 MULTISPECIES: rhodanese-related sulfurtransferase [Lysinibacillus]	4	11	0	869.508	-0.00234694	-2.69916	1	14	0.0714286	52.122	0.00960976	1.00961	FALSE	TRUE	616	566	91.2636
F:\25-03-2022\20220324-SAMPLE BROTH-POS-00.d	4423	scanId=2540781		42.3462	401.262	3208.22	2	800.509	97	10377	K.MVVAILR.T	MVVAILR	DECOY_WP_036162495.1 MULTISPECIES: D-alanyl-D-alanine carboxypeptidase [Lysinibacillus]	163	169	0	800.494	0.0151883	18.9737	1	12	0.0833333	99.15	0.00955479	1.00955	FALSE	TRUE	616	567	91.2636
F:\25-03-2022\20220324-SAMPLE BROTH-POS-00.d	4437	scanId=2548312		42.4717	509.806	947.722	2	1017.6	49	3700.8	R.RDLVIFAGK.D	RDLVIFAGK	DECOY_WP_012293670.1 MULTISPECIES: ATP-dependent DNA helicase DinG [Lysinibacillus]	39	47	1	1017.6	0.000748815	0.735866	1	16	0.0625	35.3152	0.00954258	1.00954	FALSE	TRUE	616	568	91.2636
F:\25-03-2022\20220324-SAMPLE BROTH-POS-00.d	4070	scanId=2336590		38.943	387.201	1765.98	2	772.386	51	5340.8	K.QAERNR.V	QAERNR	WP_012296165.1 MULTISPECIES: diguanylate cyclase [Lysinibacillus]	79	84	1	772.394	-0.00752291	-9.73974	1	10	0.1	50.7929	0.00951036	1.00951	TRUE	FALSE	617	568	91.2636
F:\25-03-2022\20220324-SAMPLE BROTH-POS-00.d	3020	scanId=1714668		28.5777	570.755	610.377	2	1139.5	46	3683.63	R.KEC[carbamidomethylation of C]TEVSC[carbamidomethylation of C]K.V	KECTEVSCK	DECOY_WP_012292375.1 MULTISPECIES: adenylyl-sulfate kinase [Lysinibacillus]	61	69	1	1139.5	0.00103421	0.907607	1	16	0.0625	34.4311	0.00934706	1.00935	FALSE	TRUE	617	569	91.2636
F:\25-03-2022\20220324-SAMPLE BROTH-POS-00.d	2489	scanId=1398463		23.3076	404.208	1350.9	2	806.402	30	1936.89	K.SAMGGTGVK.S	SAMGGTGVK	DECOY_WP_012293885.1 MULTISPECIES: glutamate 5-kinase [Lysinibacillus]	151	159	0	806.396	0.0062478	7.74781	1	16	0.0625	18.0865	0.00933794	1.00934	FALSE	TRUE	617	570	91.2636
F:\25-03-2022\20220324-SAMPLE BROTH-POS-00.d	2155	scanId=1197752		19.9624	571.779	679.133	2	1141.54	28	1714.88	K.SSLFDDIM(oxidation of M)AK.I	SSLFDDIMAK	DECOY_WP_012292160.1 MULTISPECIES: DUF445 family protein [Lysinibacillus]	184	193	0	1141.53	0.0111414	9.76008	1	18	0.0555556	16	0.00933009	1.00933	FALSE	TRUE	617	571	91.2636
F:\25-03-2022\20220324-SAMPLE BROTH-POS-00.d	4313	scanId=2476592		41.2764	379.249	1746.76	2	756.484	79	8023.58	K.SLPSLIK.E	SLPSLIK	WP_241744838.1 MULTISPECIES: phage tail tape measure protein [Lysinibacillus]	189	195	0	756.475	0.00932523	12.3272	1	12	0.0833333	74.55	0.00929137	1.00929	TRUE	FALSE	618	571	91.2636
F:\25-03-2022\20220324-SAMPLE BROTH-POS-00.d	4826	scanId=2741465		45.691	1344.22	1599.3	2	2686.43	148	8742.07	R.C[carbamidomethylation of C]MAISTIIPVGEDTANKLVTLLAEK.I	CMAISTIIPVGEDTANKLVTLLAEK	WP_012293679.1 MULTISPECIES: CoA-acylating methylmalonate-semialdehyde dehydrogenase [Lysinibacillus]	287	311	1	2686.43	0.00021273	0.0791868	1	48	0.0208333	81.1869	0.00928692	1.00929	TRUE	FALSE	619	571	91.2636
F:\25-03-2022\20220324-SAMPLE BROTH-POS-00.d	4080	scanId=2342679		39.0445	368.72	5300.07	2	735.426	77	7501.38	K.NYRRK.Q	NYRRK	WP_012295462.1 MULTISPECIES: 50S ribosomal protein L21 [Lysinibacillus]	81	85	2	735.414	0.012147	16.5173	1	8	0.125	69.1562	0.00921913	1.00922	TRUE	FALSE	620	571	91.2636
F:\25-03-2022\20220324-SAMPLE BROTH-POS-00.d	1830	scanId=1007279		16.7878	546.248	846.759	2	1090.48	59	4501.04	R.DLDDDTIER.N	DLDDDTIER	DECOY_WP_012293163.1 MULTISPECIES: cell division protein FtsA [Lysinibacillus]	321	329	0	1090.48	0.00325238	2.98252	1	16	0.0625	41.0278	0.00911518	1.00912	FALSE	TRUE	620	572	91.2636
F:\25-03-2022\20220324-SAMPLE BROTH-POS-00.d	4723	scanId=2682568		44.7093	623.874	5144.35	2	1245.73	213	19566.9	R.AADKVNIKLM(oxidation of M)K.C	AADKVNIKLMK	WP_012292593.1 MULTISPECIES: dipeptide epimerase [Lysinibacillus]	260	270	2	1245.71	0.0213504	17.1391	1	20	0.05	177.004	0.00904609	1.00905	TRUE	FALSE	621	572	91.2636
F:\25-03-2022\20220324-SAMPLE BROTH-POS-00.d	2740	scanId=1549562		25.8259	781.335	437.286	2	1560.65	38	2593.93	K.DNRNMFLHDDER.N	DNRNMFLHDDER	WP_036162215.1 MULTISPECIES: U32 family peptidase [Lysinibacillus]	195	206	1	1560.67	-0.0193043	-12.3692	1	22	0.0454545	22.7824	0.00878298	1.00878	TRUE	FALSE	622	572	91.2636
F:\25-03-2022\20220324-SAMPLE BROTH-POS-00.d	5057	scanId=2873783		47.8963	757.461	1541.75	2	1512.91	164	12583.6	K.IANAIKPAVAYLNR.A	IANAIKPAVAYLNR	DECOY_WP_012292187.1 MULTISPECIES: HIT family protein [Lysinibacillus]	67	80	0	1512.88	0.0290319	19.1898	1	26	0.0384615	110.004	0.00874191	1.00874	FALSE	TRUE	622	573	91.2636
F:\25-03-2022\20220324-SAMPLE BROTH-POS-00.d	2025	scanId=1122334		18.7054	475.25	880.705	2	948.486	38	2776.16	R.EFAIGMGPK.I	EFAIGMGPK	WP_012293298.1 MULTISPECIES: RIP metalloprotease RseP [Lysinibacillus]	35	43	0	948.474	0.0124924	13.1711	1	16	0.0625	24.2228	0.0087253	1.00873	TRUE	FALSE	623	573	91.2636
F:\25-03-2022\20220324-SAMPLE BROTH-POS-00.d	6192	scanId=3459421		57.6569	983.01	671.787	2	1964.01	94	6167.66	K.RNLGTQM(oxidation of M)KATGEVM(oxidation of M)ALGR.T	RNLGTQMKATGEVMALGR	WP_115673784.1 MULTISPECIES: carbamoyl-phosphate synthase large subunit [Lysinibacillus]	370	387	2	1963.99	0.0131389	6.68987	1	34	0.0294118	53.2604	0.00863543	1.00864	TRUE	FALSE	624	573	91.2636
F:\25-03-2022\20220324-SAMPLE BROTH-POS-00.d	3710	scanId=2122210		35.37	413.278	910	2	824.541	44	4021.82	R.IIELPIK.S	IIELPIK	WP_031416724.1 MULTISPECIES: DNA-directed RNA polymerase subunit beta' [Lysinibacillus]	787	793	0	824.537	0.00387204	4.69602	1	12	0.0833333	34.5	0.00857821	1.00858	TRUE	FALSE	625	573	91.2636
F:\25-03-2022\20220324-SAMPLE BROTH-POS-00.d	1288	scanId=694641		11.5772	445.716	590.379	2	889.417	35	2531.23	R.AMGWNVGR.V	AMGWNVGR	DECOY_WP_012295853.1 MULTISPECIES: inorganic phosphate transporter [Lysinibacillus]	31	38	0	889.423	-0.0055555	-6.24619	1	14	0.0714286	21.4402	0.00847026	1.00847	FALSE	TRUE	625	574	91.4229
F:\25-03-2022\20220324-SAMPLE BROTH-POS-00.d	4446	scanId=2554045		42.5673	401.262	22768.1	2	800.509	97	13355.6	R.LKASRAR.N	LKASRAR	DECOY_WP_012293152.1 MULTISPECIES: 16S rRNA (cytosine(1402)-N(4))-methyltransferase RsmH [Lysinibacillus]	14	20	2	800.498	0.0113993	14.2403	1	12	0.0833333	112.254	0.00840498	1.0084	FALSE	TRUE	625	575	91.5821
F:\25-03-2022\20220324-SAMPLE BROTH-POS-00.d	4315	scanId=2477976		41.2995	621.862	753.447	2	1241.71	44	2631.48	K.M(oxidation of M)VLPQLVGELK.E	MVLPQLVGELK	DECOY_WP_012295327.1 MULTISPECIES: molecular chaperone DnaK [Lysinibacillus]	43	53	0	1241.71	0.00463737	3.73468	1	20	0.05	21.845	0.0083014	1.0083	FALSE	TRUE	625	576	91.7414
F:\25-03-2022\20220324-SAMPLE BROTH-POS-00.d	4844	scanId=2752107		45.8683	572.864	10702.7	2	1143.71	270	30519	M.SFRKGIVPIK.K	SFRKGIVPIK	DECOY_WP_012292788.1 MULTISPECIES: polysaccharide biosynthesis protein [Lysinibacillus]	2	11	2	1143.71	0.00131558	1.15028	1	18	0.0555556	251.045	0.00822587	1.00823	FALSE	TRUE	625	577	91.7539
F:\25-03-2022\20220324-SAMPLE BROTH-POS-00.d	4519	scanId=2594427		43.2403	1104.51	1139.7	2	2207	108	9004.34	K.AYFQTEYDEDYFLFKTK.E	AYFQTEYDEDYFLFKTK	WP_036162045.1 MULTISPECIES: S8 family serine peptidase [Lysinibacillus]	784	800	1	2207.01	-0.014394	-6.52194	1	32	0.03125	73.4089	0.00815261	1.00815	TRUE	FALSE	626	577	91.7539
F:\25-03-2022\20220324-SAMPLE BROTH-POS-00.d	2724	scanId=1539810		25.6634	601.787	566.453	2	1201.56	34	2252.81	K.RAEEDGQEIR.E	RAEEDGQEIR	DECOY_WP_012295242.1 MULTISPECIES: RNA polymerase sigma factor RpoD [Lysinibacillus]	238	247	1	1201.57	-0.00958978	-7.98105	1	18	0.0555556	18.0278	0.00800234	1.008	FALSE	TRUE	626	578	91.8033
F:\25-03-2022\20220324-SAMPLE BROTH-POS-00.d	4431	scanId=2544879		42.4145	520.798	2339.06	2	1039.58	65	7719.88	K.YRQLIYGK.G	YRQLIYGK	DECOY_WP_031416030.1 MULTISPECIES: DNA topoisomerase IV subunit B [Lysinibacillus]	82	89	1	1039.58	0.000280837	0.270144	1	14	0.0714286	61.0286	0.00790538	1.00791	FALSE	TRUE	626	579	91.8033
F:\25-03-2022\20220324-SAMPLE BROTH-POS-00.d	4413	scanId=2535419		42.2569	521.295	1692.77	2	1040.57	68	5757.23	-.M(oxidation of M)KQLYKSK.I	MKQLYKSK	WP_012293901.1 MULTISPECIES: ABC transporter permease [Lysinibacillus]	1	8	2	1040.57	0.0060291	5.79404	1	14	0.0714286	45.0023	0.00781665	1.00782	TRUE	FALSE	627	579	91.8033
F:\25-03-2022\20220324-SAMPLE BROTH-POS-00.d	4463	scanId=2562575		42.7094	837.924	494.454	2	1673.83	33	2229.28	K.RMESMVDSFFGKIK.G	RMESMVDSFFGKIK	DECOY_WP_025116455.1 MULTISPECIES: preprotein translocase subunit SecE [Lysinibacillus]	47	60	2	1673.83	0.00713666	4.26368	1	26	0.0384615	17.0156	0.0076328	1.00763	FALSE	TRUE	627	580	91.8033
F:\25-03-2022\20220324-SAMPLE BROTH-POS-00.d	3745	scanId=2143044		35.7173	612.832	499.884	2	1223.65	23	2255.21	K.HLDDPLVIM(oxidation of M)R.G	HLDDPLVIMR	DECOY_WP_012291836.1 MULTISPECIES: patatin-like phospholipase family protein [Lysinibacillus]	157	166	0	1223.63	0.0164261	13.4241	1	18	0.0555556	17.075	0.00757136	1.00757	FALSE	TRUE	627	581	91.8033
F:\25-03-2022\20220324-SAMPLE BROTH-POS-00.d	1972	scanId=1091015		18.1835	653.822	492	2	1305.63	29	2157.58	R.NLTVM(oxidation of M)EEAVER.G	NLTVMEEAVER	WP_012293225.1 MULTISPECIES: L-serine ammonia-lyase, iron-sulfur-dependent, subunit alpha [Lysinibacillus]	48	58	0	1305.62	0.0054006	4.13641	1	20	0.05	16.2857	0.00754813	1.00755	TRUE	FALSE	628	581	91.8033
F:\25-03-2022\20220324-SAMPLE BROTH-POS-00.d	4842	scanId=2750736		45.8455	550.852	6650.84	2	1099.69	225	20343.3	R.VKSPKSILTK.M	VKSPKSILTK	WP_012295401.1 MULTISPECIES: GTP pyrophosphokinase family protein [Lysinibacillus]	58	67	2	1099.7	-0.00757541	-6.88864	1	18	0.0555556	152.52	0.00749734	1.0075	TRUE	FALSE	629	581	91.8033
F:\25-03-2022\20220324-SAMPLE BROTH-POS-00.d	3784	scanId=2166698		36.1115	671.865	469.35	2	1341.72	29	2571.57	K.TPIVAHYDSVLK.E	TPIVAHYDSVLK	WP_012295330.1 MULTISPECIES: radical SAM family heme chaperone HemW [Lysinibacillus]	334	345	0	1341.73	-0.0130057	-9.69326	1	22	0.0454545	19.2667	0.00749217	1.00749	TRUE	FALSE	630	581	91.8033
F:\25-03-2022\20220324-SAMPLE BROTH-POS-00.d	1175	scanId=631710		10.5284	590.803	300.433	2	1179.59	18	804.218	R.QMIHTATHNK.V	QMIHTATHNK	DECOY_WP_126657206.1 MULTISPECIES: alanine--tRNA ligase [Lysinibacillus]	306	315	0	1179.58	0.0103906	8.80874	1	18	0.0555556	6.01786	0.00748287	1.00748	FALSE	TRUE	630	582	91.9614
[truncated: 391 more rows]

## Sheet: Unique Peptide
Filename	Spectrum Number	Spectrum ID	Spectrum Title	Retention Time (minutes)	Precursor m/z	Precursor Intensity	Precursor Charge	Precursor Mass (Da)	Experimental Peaks	Total Intensity	Peptide Sequence	Base Peptide Sequence	Protein Description	Start Residue Number	Stop Residue Number	Missed Cleavages	Theoretical Mass (Da)	Precursor Mass Error (Da)	Precursor Mass Error (ppm)	Matching Products	Total Products	Ratio of Matching Products	Matching Intensity	Fraction of Intensity Matching	Morpheus Score	Target?	Decoy?	Cumulative Target	Cumulative Decoy	Q-Value (%)
[truncated: 1,523 more rows]
