# Supplementary material for: What transcriptomics and proteomics can tell us about a high borate perturbed boron tolerant Bacilli strain
Source: Royal Society of Chemistry journal article supplement (doi:10.1039/d3mo00023k), 2023-04-04
Supplement: d3mo00023k3.xlsx [file d3mo00023k3.xlsx]

## Sheet: T50NA
Top 50% Protein from "Not Matched" set of SB & TB
SB	Protein#	Column1	Functions	Organism	Total Intensity	Peptide Sequence	Base Peptide Sequence	SB vs TB		TB	Protein#	Column1	Functions	Organism	Total Intensity	Peptide Sequence	Base Peptide Sequence	TB vs SB
1	WP_036162416.1	MULTISPECIES:	DUF4272domain-containingprotein	Lysinibacillus]	40582.7	R.KNKTIAYLK.E	KNKTIAYLK	NotMatch			WP_012291836.1	MULTISPECIES:	patatin-likephospholipasefamilyprotein	Lysinibacillus	82755.2	K.ETLLEIGRNR.T	ETLLEIGRNR	NotMatch
2	WP_012295480.1	MULTISPECIES:	porphobilinogensynthase	Lysinibacillus]	34660.9	K.KVVLETLLGMKR.A	KVVLETLLGMKR	NotMatch			WP_054611963.1	MULTISPECIES:	glycerol-3-phosphateresponsiveantiterminator	Lysinibacillus	44135.9	K.LIIHADLIHGLK.T	LIIHADLIHGLK	NotMatch
3	WP_012292711.1	MULTISPECIES:	PBP1Afamilypenicillin-bindingprotein	Lysinibacillus]	34062.2	R.IAGAILVDIK.A	IAGAILVDIK	NotMatch			WP_036161253.1	MULTISPECIES:	malatedehydrogenase	Lysinibacillus	33311.9	K.AALPVM(oxidationofM)EGKAILLK.R	AALPVMEGKAILLK	NotMatch
4	WP_012292015.1	MULTISPECIES:	amidophosphoribosyltransferase	Lysinibacillus]	33189.3	K.LSPVVQVVK.G	LSPVVQVVK	NotMatch			WP_031418044.1	MULTISPECIES:	malatesynthaseA	Lysinibacillus	29956.5	R.VEITGPVDRK.M	VEITGPVDRK	NotMatch
5	WP_012293342.1	MULTISPECIES:	2-oxoacid:acceptoroxidoreductasesubunitalpha	Lysinibacillus]	33148.6	R.VGAWELSPADGKRR.M	VGAWELSPADGKRR	NotMatch			WP_241744852.1	MULTISPECIES:	3-hydroxyacyl-CoAdehydrogenase/enoyl-CoAhydratasefamilyprotein	Lysinibacillus	29923.8	R.LVNGALQK.L	LVNGALQK	NotMatch
6	WP_012293723.1	MULTISPECIES:	TldD/PmbAfamilyprotein	Lysinibacillus]	31985.6	R.KNILIENGILK.G	KNILIENGILK	NotMatch			WP_051563170.1	MULTISPECIES:	S-layerprotein	Lysinibacillus	27152.9	K.KVSVTLPAIDKK.E	KVSVTLPAIDKK	NotMatch
7	WP_012292249.1	MULTISPECIES:	DUF6241domain-containingprotein	Lysinibacillus]	30619.1	K.FRELYIEILER.W	FRELYIEILER	NotMatch			WP_031416589.1	MULTISPECIES:	FosMfamilyfosfomycinresistanceprotein	Lysinibacillus	26318.8	K.LVQLKVLILDGRQR.D	LVQLKVLILDGRQR	NotMatch
8	WP_012292015.1	MULTISPECIES:	amidophosphoribosyltransferase	Lysinibacillus]	28863.9	K.LSPVVQVVKGK.R	LSPVVQVVKGK	NotMatch			WP_012292541.1	MULTISPECIES:	M20/M25/M40familymetallo-hydrolase	Lysinibacillus	24850.7	R.QLPIAKQIEK.L	QLPIAKQIEK	NotMatch
9	WP_012295854.1	MULTISPECIES:	MMPLfamilytransporter	Lysinibacillus]	26874.2	R.LLRVKPGGANR.W	LLRVKPGGANR	NotMatch			WP_012292153.1	MULTISPECIES:	YafYfamilytranscriptionalregulator	Lysinibacillus	21459.4	R.LLTMIM(oxidationofM)ILINRK.K	LLTMIMILINRK	NotMatch
10	WP_036161535.1	MULTISPECIES:	FMN-bindingnegativetranscriptionalregulator	Lysinibacillus]	25905.3	K.GIKGFKIK.V	GIKGFKIK	NotMatch			WP_012292041.1	MULTISPECIES:	serineprotease	Lysinibacillus	20294.5	M.VVTMRPLKIKYK.K	VVTMRPLKIKYK	NotMatch
11	WP_012295691.1	MULTISPECIES:	catabolitecontrolproteinA	Lysinibacillus]	25348.9	R.LLTKLMSK.E	LLTKLMSK	NotMatch			WP_012292041.1	MULTISPECIES:	serineprotease	Lysinibacillus	19683.3	M.VVTMRPLKIKYK.K	VVTMRPLKIKYK	NotMatch
12	WP_012291919.1	MULTISPECIES:	4-hydroxy-tetrahydrodipicolinatesynthase	Lysinibacillus]	24947	K.VGRDVPNITHIK.E	VGRDVPNITHIK	NotMatch			WP_024363854.1	MULTISPECIES:	ribonucleaseHIII	Lysinibacillus	18882.8	M.SNIVLLISTTAQK.E	SNIVLLISTTAQK	NotMatch
13	WP_012293293.1	MULTISPECIES:	UMPkinase	Lysinibacillus]	24327.6	R.AVLGEKIGTVVR.R	AVLGEKIGTVVR	NotMatch			WP_012292227.1	MULTISPECIES:	imidazoleglycerolphosphatesynthasesubunitHisF	Lysinibacillus	18654.1	K.EYLRAKGVAVR.-	EYLRAKGVAVR	NotMatch
14	WP_206700893.1	MULTISPECIES:	UDP-N-acetylglucosamine1-carboxyvinyltransferase	Lysinibacillus]	24256.1	K.IIVTGGQKLQGKVR.V	IIVTGGQKLQGKVR	NotMatch			WP_012293660.1	MULTISPECIES:	N-acetyl-alpha-D-glucosaminylL-malatesynthaseBshA	Lysinibacillus	18359	K.VLIHVSNFR.K	VLIHVSNFR	NotMatch
15	WP_217581670.1	MULTISPECIES:	PucRfamilytranscriptionalregulatorligand-bindingdomain-containingprotein	Lysinibacillus]	24233.2	R.KSYVIFILLHTK.D	KSYVIFILLHTK	NotMatch			WP_036161253.1	MULTISPECIES:	malatedehydrogenase	Lysinibacillus	17553.3	K.AALPVMEGKAILLKR.F	AALPVMEGKAILLKR	NotMatch
16	WP_012293325.1	MULTISPECIES:	insulinasefamilyprotein	Lysinibacillus]	23861.4	K.LTSAIKEELAK.F	LTSAIKEELAK	NotMatch			WP_012296034.1	MULTISPECIES:	CdaRfamilyprotein	Lysinibacillus	17080.6	K.LPDGVTKISDK.K	LPDGVTKISDK	NotMatch
17	WP_227256914.1	MULTISPECIES:	acyltransferasefamilyprotein	Lysinibacillus]	23553.9	K.IISFLPFSAYLIGK.S	IISFLPFSAYLIGK	NotMatch			WP_012292466.1	MULTISPECIES:	sensordomain-containingdiguanylatecyclase	Lysinibacillus	16565	-.M(oxidationofM)KSHQLKLK.N	MKSHQLKLK	NotMatch
18	WP_054549978.1	MULTISPECIES:	endonucleaseMutS2	Lysinibacillus]	22994.8	R.SHALLLESETLRK.E	SHALLLESETLRK	NotMatch			WP_174804706.1	MULTISPECIES:	ATP-bindingcassettedomain-containingprotein	Lysinibacillus	16319	M.LVSEKEIVLEVKK.L	LVSEKEIVLEVKK	NotMatch
19	WP_031416796.1	MULTISPECIES:	heptaprenylglycerylphosphatesynthase	Lysinibacillus]	22866.5	K.AALATVKAVKNTL.-	AALATVKAVKNTL	NotMatch			WP_012292489.1	MULTISPECIES:	urocanatehydratase	Lysinibacillus	15884	K.GVHIPMLK.D	GVHIPMLK	NotMatch
20	WP_012292908.1	MULTISPECIES:	acylneuraminatecytidylyltransferasefamilyprotein	Lysinibacillus]	22529	-.M(oxidationofM)KPKVLAIIPARGGSK.S	MKPKVLAIIPARGGSK	NotMatch			WP_031416080.1	MULTISPECIES:	EALdomain-containingprotein	Lysinibacillus	15786.3	K.MLEAQFLQLKK.L	MLEAQFLQLKK	NotMatch
21	WP_012292715.1	MULTISPECIES:	DUF1934domain-containingprotein	Lysinibacillus]	22031	-.M(oxidationofM)ANEVRSQVNIK.L	MANEVRSQVNIK	NotMatch			WP_036226253.1	MULTISPECIES:	extracellularsolute-bindingprotein	Lysinibacillus	15773.9	K.VKTGEVAAGFGLR.I	VKTGEVAAGFGLR	NotMatch
22	WP_036162045.1	MULTISPECIES:	S8familyserinepeptidase	Lysinibacillus]	20971.8	K.LVNGVPSKTSALTK.E	LVNGVPSKTSALTK	NotMatch			WP_031419728.1	MULTISPECIES:	phosphoenolpyruvate--proteinphosphotransferase	Lysinibacillus	15346.9	R.ALLRASVYGNLK.I	ALLRASVYGNLK	NotMatch
23	WP_036162422.1	MULTISPECIES:	D-alanine--D-alanineligase	Lysinibacillus]	20873.3	M.RVGVIMGGTSSEK.Q	RVGVIMGGTSSEK	NotMatch			WP_012296034.1	MULTISPECIES:	CdaRfamilyprotein	Lysinibacillus	15028.9	K.LPDGVTKISDK.K	LPDGVTKISDK	NotMatch
24	WP_012295234.1	MULTISPECIES:	NAD(P)H-dependentoxidoreductase	Lysinibacillus]	20246.5	K.NALDFLRVEWNNK.A	NALDFLRVEWNNK	NotMatch			WP_206701009.1	MULTISPECIES:	o-succinylbenzoatesynthase	Lysinibacillus	14419.2	K.QSLARALGGQK.T	QSLARALGGQK	NotMatch
25	WP_025115432.1	MULTISPECIES:	RsfAfamilytranscriptionalregulator	Lysinibacillus]	20181.1	K.KLEKTITK.L	KLEKTITK	NotMatch			WP_196764890.1	MULTISPECIES:	phageterminaselargesubunitfamilyprotein	Lysinibacillus	13926.3	R.RVFAIKGR.G	RVFAIKGR	NotMatch
26	WP_012292230.1	MULTISPECIES:	thioredoxin-disulfidereductase	Lysinibacillus]	19964.8	K.VTIVHRRDK.L	VTIVHRRDK	NotMatch			WP_012292231.1	MULTISPECIES:	8-oxo-dGTPdiphosphatase	Lysinibacillus	13509.4	M.QRIANLIAVKDGK.V	QRIANLIAVKDGK	NotMatch
27	WP_012292593.1	MULTISPECIES:	dipeptideepimerase	Lysinibacillus]	19566.9	R.AADKVNIKLM(oxidationofM)K.C	AADKVNIKLMK	NotMatch			WP_036161628.1	MULTISPECIES:	2-oxoglutaratedehydrogenaseE1component	Lysinibacillus	12497	K.FGKDIVVDLVGYR.R	FGKDIVVDLVGYR	NotMatch
28	WP_012293346.1	MULTISPECIES:	alkalinephosphatasefamilyprotein	Lysinibacillus]	19221.9	M.QNKKVVLIVVDALR.F	QNKKVVLIVVDALR	NotMatch			WP_054550251.1	MULTISPECIES:	transcriptionalregulatorYeiL	Lysinibacillus	12220.1	R.LC[carbamidomethylationofC]VFLGEKATK.M	LCVFLGEKATK	NotMatch
29	WP_012292344.1	MULTISPECIES:	DUF86domain-containingprotein	Lysinibacillus]	18471.3	K.AVVGLRKMLVR.E	AVVGLRKMLVR	NotMatch			WP_012295215.1	MULTISPECIES:	Nif11familyprotein	Lysinibacillus	11463.3	R.QLIALFTK.-	QLIALFTK	NotMatch
30	WP_012293346.1	MULTISPECIES:	alkalinephosphatasefamilyprotein	Lysinibacillus]	18283.8	-.MQNKKVVLIVVDALR.F	MQNKKVVLIVVDALR	NotMatch			WP_031417481.1	MULTISPECIES:	(2Fe-2S)ferredoxindomain-containingprotein	Lysinibacillus	11411.5	R.TAQTTAIKGIEK.V	TAQTTAIKGIEK	NotMatch
31	WP_058843384.1	MULTISPECIES:	pyruvatekinase	Lysinibacillus]	17719.4	R.IQLIREVAQK.L	IQLIREVAQK	NotMatch			WP_012295328.1		nucleotideexchangefactorGrpE	Lysinibacillusfusiformis	11037.2	R.SLLEATEK.E	SLLEATEK	NotMatch
32	WP_012292053.1	MULTISPECIES:	SpoVRfamilyprotein	Lysinibacillus]	17164.8	R.LKQFPPKPEK.D	LKQFPPKPEK	NotMatch			WP_031418922.1	MULTISPECIES:	celldivisionproteinFtsZ	Lysinibacillus	10773.1	R.KRQTQAIGGIGSMK.E	KRQTQAIGGIGSMK	NotMatch
33	WP_031416796.1	MULTISPECIES:	heptaprenylglycerylphosphatesynthase	Lysinibacillus]	16996.7	K.AALATVKAVKNTL.-	AALATVKAVKNTL	NotMatch			WP_036161090.1	MULTISPECIES:	YwhDfamilyprotein	Lysinibacillus	10689.8	K.ALKGTFILSHVDPK.S	ALKGTFILSHVDPK	NotMatch
34	WP_012291905.1	MULTISPECIES:	dihydropteroatesynthase	Lysinibacillus]	16837.9	K.EVDAIISVDTYKANVAR.A	EVDAIISVDTYKANVAR	NotMatch			WP_227256892.1	MULTISPECIES:	agmatinasefamilyprotein	Lysinibacillus	10542.2	R.EQGIHMITLKQMR.R	EQGIHMITLKQMR	NotMatch
35	WP_031418479.1	MULTISPECIES:	heterodisulfidereductase-relatediron-sulfurbindingcluster	Lysinibacillus]	16794.9	R.RLGNEFLFQELATANIDEFVK.N	RLGNEFLFQELATANIDEFVK	NotMatch			WP_206700948.1	MULTISPECIES:	tRNA(guanosine(46)-N7)-methyltransferaseTrmB	Lysinibacillus	10250	K.SPANLR.L	SPANLR	NotMatch
36	WP_012292903.1	MULTISPECIES:	DUF115domain-containingprotein	Lysinibacillus]	16190.4	K.INQLSLKR.D	INQLSLKR	NotMatch			WP_012292398.1	MULTISPECIES:	Glu/Leu/Phe/Valdehydrogenase	Lysinibacillus	10074.4	R.NINM(oxidationofM)RLAAYM(oxidationofM)VGVRR.T	NINMRLAAYMVGVRR	NotMatch
37	WP_012293155.1	MULTISPECIES:	stageVsporulationproteinD	Lysinibacillus]	15113.5	K.LLEKMKK.K	LLEKMKK	NotMatch			WP_012293240.1	MULTISPECIES:	chromosomesegregationproteinSMC	Lysinibacillus	9895.55	-.MFLKRLEVIGFK.S	MFLKRLEVIGFK	NotMatch
38	WP_036162327.1	MULTISPECIES:	DMTfamilytransporter	Lysinibacillus]	14711.6	K.EIRTLLFMK.R	EIRTLLFMK	NotMatch			WP_012293220.1	MULTISPECIES:	M20/M25/M40familymetallo-hydrolase	Lysinibacillus	9262.52	K.REKVQGVGTVNVLR.Y	REKVQGVGTVNVLR	NotMatch
39	WP_036160800.1	MULTISPECIES:	DUF2268domain-containingputativeZn-dependentprotease	Lysinibacillus]	14611.3	K.FKIVNAYK.L	FKIVNAYK	NotMatch			WP_139015331.1	MULTISPECIES:	DUF2306domain-containingprotein	Lysinibacillus	9128.51	K.GYLFIKK.K	GYLFIKK	NotMatch
40	WP_012295566.1	MULTISPECIES:	excinucleaseABCsubunitUvrC	Lysinibacillus]	14341.5	K.YKTRTAAK.H	YKTRTAAK	NotMatch			WP_012292899.1	MULTISPECIES:	flagellarhook-associatedproteinFlgL	Lysinibacillus	9081.64	R.EVNVTKQLR.D	EVNVTKQLR	NotMatch
41	WP_012295331.1	MULTISPECIES:	chromateeffluxtransporter	Lysinibacillus]	14314.9	K.KLWKVVESLR.T	KLWKVVESLR	NotMatch			WP_012295454.1	MULTISPECIES:	transcriptionrepressorNadR	Lysinibacillus	8921.99	K.KMLGEER.R	KMLGEER	NotMatch
42	WP_012292075.1	MULTISPECIES:	exonucleaseSbcCDsubunitD	Lysinibacillus]	14079	R.NIFVGHAFVTK.Y	NIFVGHAFVTK	NotMatch			WP_031418723.1	MULTISPECIES:	competenceproteinComK	Lysinibacillus	8867.35	K.KIELPIQYASISKQFVNASM(oxidationofM)LYK.H	KIELPIQYASISKQFVNASMLYK	NotMatch
43	WP_036160521.1	MULTISPECIES:	Damfamilysite-specificDNA-(adenine-N6)-methyltransferase	Lysinibacillus]	14011.1	R.KLETKAAR.F	KLETKAAR	NotMatch			WP_012296034.1	MULTISPECIES:	CdaRfamilyprotein	Lysinibacillus	8813.68	K.LPDGVTKISDK.K	LPDGVTKISDK	NotMatch
44	WP_012293188.1	MULTISPECIES:	dihydroorotatedehydrogenaseelectrontransfersubunit	Lysinibacillus]	13938.3	K.QLNARGVK.T	QLNARGVK	NotMatch			WP_012293464.1	MULTISPECIES:	ImmA/IrrEfamilymetallo-endopeptidase	Lysinibacillus	8726.46	R.AYIFLNQDLSPK.Q	AYIFLNQDLSPK	NotMatch
45	WP_012293684.1	MULTISPECIES:	NAD-dependentdihydropyrimidinedehydrogenasesubunitPreA	Lysinibacillus]	13721.4	K.GLASVM(oxidationofM)DLVGR.S	GLASVMDLVGR	NotMatch			WP_241744852.1	MULTISPECIES:	3-hydroxyacyl-CoAdehydrogenase/enoyl-CoAhydratasefamilyprotein	Lysinibacillus	8602.78	R.EVPAFVK.E	EVPAFVK	NotMatch
46	WP_012292053.1	MULTISPECIES:	SpoVRfamilyprotein	Lysinibacillus]	13142.2	R.LKQFPPKPEK.D	LKQFPPKPEK	NotMatch			WP_012295184.1	MULTISPECIES:	superoxidedismutase	Lysinibacillus	8585.54	K.DINDLIANLDALPADK.Q	DINDLIANLDALPADK	NotMatch
47	WP_036162046.1	MULTISPECIES:	glycosyltransferase	Lysinibacillus]	12963.8	K.AKIFC[carbamidomethylationofC]LTSTVEC[carbamidomethylationofC]FAHVFAEAAK.N	AKIFCLTSTVECFAHVFAEAAK	NotMatch			WP_008181717.1	MULTISPECIES:	30SribosomalproteinS8	Lysinibacillus	8488.58	R.ISKPGLR.V	ISKPGLR	NotMatch
48	WP_012295177.1	MULTISPECIES:	phosphateABCtransporterATP-bindingproteinPstB	Lysinibacillus]	12714	R.LNQNAYGLSGGQQQR.I	LNQNAYGLSGGQQQR	NotMatch			WP_012293240.1	MULTISPECIES:	chromosomesegregationproteinSMC	Lysinibacillus	8448.16	R.LGPLEMQASSARDYVQMSTELK.D	LGPLEMQASSARDYVQMSTELK	NotMatch
49	WP_012293767.1	MULTISPECIES:	ethanolamineammonia-lyasesubunitEutC	Lysinibacillus]	12399.8	R.IGVGRAGTRPK.T	IGVGRAGTRPK	NotMatch			WP_012295916.1	MULTISPECIES:	BCCTfamilytransporter	Lysinibacillus	8367.97	R.KHLEKEAK.A	KHLEKEAK	NotMatch
50	WP_012293758.1	MULTISPECIES:	classISAM-dependentRNAmethyltransferase	Lysinibacillus]	12110.2	K.RLGFLDESGATYKIEVSILK.D	RLGFLDESGATYKIEVSILK	NotMatch			WP_012293641.1	MULTISPECIES:	long-chainfattyacid--CoAligase	Lysinibacillus	8362.62	R.LNPRDLSSMR.L	LNPRDLSSMR	NotMatch
51	WP_089986041.1	MULTISPECIES:	uracil-DNAglycosylase	Lysinibacillus]	11540.9	K.QIPSVVVK.Q	QIPSVVVK	NotMatch			WP_012293305.1	MULTISPECIES:	30Sribosome-bindingfactorRbfA	Lysinibacillus	8249.72	K.KELGDILGR.K	KELGDILGR	NotMatch
52	WP_012293406.1	MULTISPECIES:	site-specifictyrosinerecombinaseXerD	Lysinibacillus]	10486.9	R.VFGKGGKER.I	VFGKGGKER	NotMatch			WP_012293045.1	MULTISPECIES:	CBSdomain-containingprotein	Lysinibacillus	8208.25	K.QLKKYIYQK.E	QLKKYIYQK	NotMatch
53	WP_012296047.1	MULTISPECIES:	tRNApseudouridine(38-40)synthaseTruA	Lysinibacillus]	9756.05	R.VLAIMHK.E	VLAIMHK	NotMatch			WP_036161220.1	MULTISPECIES:	asparagine--tRNAligase	Lysinibacillus	8099.94	K.IGAWLANKRSSGK.I	IGAWLANKRSSGK	NotMatch
54	WP_036161726.1	MULTISPECIES:	Hsp33familymolecularchaperoneHslO	Lysinibacillus]	9579.74	R.LDRIPTISAM(oxidationofM)VR.D	LDRIPTISAMVR	NotMatch			WP_036162599.1	MULTISPECIES:	fibronectin-bindingdomain-containingprotein	Lysinibacillus	8041.54	R.YISSTGTAISVGKNNKQNDM(oxidationofM)LTFK.I	YISSTGTAISVGKNNKQNDMLTFK	NotMatch
55	WP_031419015.1	MULTISPECIES:	CDP-diacylglycerol--glycerol-3-phosphate3-phosphatidyltransferase	Lysinibacillus]	9353.15	M.NIPNKITISR.I	NIPNKITISR	NotMatch			WP_036161116.1	MULTISPECIES:	PTSsugartransportersubunitIIA	Lysinibacillus	7922.52	-.MLTKLLTK.D	MLTKLLTK	NotMatch
56	WP_036162045.1	MULTISPECIES:	S8familyserinepeptidase	Lysinibacillus]	9004.34	K.AYFQTEYDEDYFLFKTK.E	AYFQTEYDEDYFLFKTK	NotMatch			WP_012292167.1	MULTISPECIES:	glyceratekinase	Lysinibacillus	7789.35	R.LKTKQIFELYIQK.G	LKTKQIFELYIQK	NotMatch
57	WP_012295980.1	MULTISPECIES:	NAD(P)H-dependentoxidoreductase	Lysinibacillus]	8922.16	K.ALYTIR.-	ALYTIR	NotMatch			WP_031419325.1	MULTISPECIES:	YugNfamilyprotein	Lysinibacillus	7772.04	R.WIQAGEQVVEEKVLPFFIN.-	WIQAGEQVVEEKVLPFFIN	NotMatch
58	WP_012292335.1	MULTISPECIES:	DUF72domain-containingprotein	Lysinibacillus]	8882.63	R.NQTWYADNVVQQTMDFLR.E	NQTWYADNVVQQTMDFLR	NotMatch			WP_012295985.1	MULTISPECIES:	Rrf2familytranscriptionalregulator	Lysinibacillus	7747.05	M.MKYSKATNYALHTMVFLTNMPK.G	MKYSKATNYALHTMVFLTNMPK	NotMatch
59	WP_036119560.1	MULTISPECIES:	DRTGGdomain-containingprotein	Lysinibacillus]	8376.76	R.HFQKM(oxidationofM)NER.T	HFQKMNER	NotMatch			WP_068986561.1	MULTISPECIES:	cysteine--tRNAligase	Lysinibacillus	7741.03	K.DDALDFALWK.A	DDALDFALWK	NotMatch
60	WP_080695199.1	MULTISPECIES:	alpha-Edomain-containingprotein	Lysinibacillus]	8351.51	R.LPAELWEIQNAFYLTK.Q	LPAELWEIQNAFYLTK	NotMatch			WP_012294202.1	MULTISPECIES:	MarRfamilywingedhelix-turn-helixtranscriptionalregulator	Lysinibacillus	7701.01	R.KNLLFLTR.K	KNLLFLTR	NotMatch
61	WP_241744838.1	MULTISPECIES:	phagetailtapemeasureprotein	Lysinibacillus]	8023.58	K.SLPSLIK.E	SLPSLIK	NotMatch			WP_012295770.1	MULTISPECIES:	TraR/DksAC4-typezincfingerprotein	Lysinibacillus	7364.33	-.MDQQVMKK.L	MDQQVMKK	NotMatch
62	WP_012295646.1	MULTISPECIES:	septationringformationregulatorEzrA	Lysinibacillus]	7522.34	R.WRNIWDEVIDVHMTK.I	WRNIWDEVIDVHMTK	NotMatch			WP_012295807.1	MULTISPECIES:	succinateCoAtransferase	Lysinibacillus	7327.9	R.IGDIGIK.V	IGDIGIK	NotMatch
63	WP_031419674.1	MULTISPECIES:	DUF3986familyprotein	Lysinibacillus]	7430.3	K.SSKLFK.E	SSKLFK	NotMatch			WP_031418282.1	MULTISPECIES:	uroporphyrinogendecarboxylase	Lysinibacillus	7323.49	K.DIVTPLPGIGIDVK.I	DIVTPLPGIGIDVK	NotMatch
64	WP_012292940.1	MULTISPECIES:	fumarylacetoacetatehydrolasefamilyprotein	Lysinibacillus]	7288.61	R.GKNIPK.N	GKNIPK	NotMatch			WP_012291834.1	MULTISPECIES:	HD-GYPdomain-containingprotein	Lysinibacillus	7288.29	R.EIDVEVVVEDIPTFR.K	EIDVEVVVEDIPTFR	NotMatch
65	WP_012293077.1	MULTISPECIES:	family10glycosylhydrolase	Lysinibacillus]	7247.05	K.QGTNPGYDPLTILVEESHKR.G	QGTNPGYDPLTILVEESHKR	NotMatch			WP_012295611.1	MULTISPECIES:	proteasemodulatorHflC	Lysinibacillus	7194.09	K.KGTLNPK.K	KGTLNPK	NotMatch
66	WP_031419090.1	MULTISPECIES:	cellwall-activeantibioticsresponseproteinLiaF	Lysinibacillus]	7149.07	K.NDLIGTIQAPTEAYK.W	NDLIGTIQAPTEAYK	NotMatch			WP_036220157.1	MULTISPECIES:	tailfiberprotein	Lysinibacillus	7184.43	R.M(oxidationofM)FSGK.F	MFSGK	NotMatch
67	WP_012295296.1	MULTISPECIES:	phageportalprotein	Lysinibacillus]	7115.28	R.QNILHLM(oxidationofM)ESERPEQRR.G	QNILHLMESERPEQRR	NotMatch			WP_012293922.1	MULTISPECIES:	DUF1572familyprotein	Lysinibacillus	7178.55	R.GEKLAVIDAIER.Q	GEKLAVIDAIER	NotMatch
68	WP_012294159.1	MULTISPECIES:	bileacid:sodiumsymporterfamilyprotein	Lysinibacillus]	7031.17	K.LAPFSK.L	LAPFSK	NotMatch			WP_012295184.1	MULTISPECIES:	superoxidedismutase	Lysinibacillus	7124.7	K.DINDLIANLDALPADK.Q	DINDLIANLDALPADK	NotMatch
69	WP_036160442.1	MULTISPECIES:	SGNH/GDSLhydrolasefamilyprotein	Lysinibacillus]	7030.39	K.IKTEEAR.D	IKTEEAR	NotMatch			WP_012295819.1	MULTISPECIES:	DUF2500domain-containingprotein	Lysinibacillus	7099.26	R.QELKVNGR.D	QELKVNGR	NotMatch
70	WP_012293075.1	MULTISPECIES:	bifunctionallysylphosphatidylglycerolflippase/synthetaseMprF	Lysinibacillus]	6907.84	R.VSVDLMR.F	VSVDLMR	NotMatch			WP_012295425.1	MULTISPECIES:	bifunctional(p)ppGppsynthetase/guanosine-3',5'-bis(diphosphate)3'-pyrophosphohydrolase	Lysinibacillus	7078.46	K.M(oxidationofM)VLQKKQFNEIYDLLAIR.V	MVLQKKQFNEIYDLLAIR	NotMatch
71	WP_036161829.1	MULTISPECIES:	7-carboxy-7-deazaguaninesynthaseQueE	Lysinibacillus]	6756.83	K.TMFVR.T	TMFVR	NotMatch			WP_089986081.1	MULTISPECIES:	vitaminB12-dependentribonucleotidereductase	Lysinibacillus	7056.51	K.RNATGLAVVEKTPEK.R	RNATGLAVVEKTPEK	NotMatch
72	WP_012295244.1	MULTISPECIES:	glycine--tRNAligase	Lysinibacillus]	6520.16	R.TPFGIAQIGK.S	TPFGIAQIGK	NotMatch			WP_012295923.1	MULTISPECIES:	DinBfamilyprotein	Lysinibacillus	7049.22	R.EQQLEK.T	EQQLEK	NotMatch
73	WP_012294158.1	MULTISPECIES:	DMTfamilytransporter	Lysinibacillus]	6356.71	K.ENITPK.K	ENITPK	NotMatch			WP_012293240.1	MULTISPECIES:	chromosomesegregationproteinSMC	Lysinibacillus	7043.37	R.GNELKRNR.V	GNELKRNR	NotMatch
74	WP_036162843.1	MULTISPECIES:	glycosyltransferase	Lysinibacillus]	6263.42	R.VIETVEPNK.G	VIETVEPNK	NotMatch			WP_031417705.1	MULTISPECIES:	Fe-SclusterassemblyproteinSufB	Lysinibacillus	6994.91	K.QDLEDLGIVFK.D	QDLEDLGIVFK	NotMatch
75	WP_012292605.1	MULTISPECIES:	glycerol-3-phosphateacyltransferase	Lysinibacillus]	6181.07	K.VTSAFKK.K	VTSAFKK	NotMatch			WP_036161906.1	MULTISPECIES:	Rrf2familytranscriptionalregulator	Lysinibacillus	6990.1	R.IVM(oxidationofM)AKEFFHK.K	IVMAKEFFHK	NotMatch
76	WP_227256919.1	MULTISPECIES:	alpha-amylasefamilyglycosylhydrolase	Lysinibacillus]	5993.22	R.QEQDAS.-	QEQDAS	NotMatch			WP_024363933.1	MULTISPECIES:	co-chaperoneGroES	Lysinibacillus	6921.12	K.SAFGIVLPDSAK.E	SAFGIVLPDSAK	NotMatch
77	WP_012293406.1	MULTISPECIES:	site-specifictyrosinerecombinaseXerD	Lysinibacillus]	5458.36	R.LSEVYKQFHPRA.-	LSEVYKQFHPRA	NotMatch			WP_012293782.1	MULTISPECIES:	IclRfamilytranscriptionalregulator	Lysinibacillus	6870.15	K.IESLKPVLLYTR.V	IESLKPVLLYTR	NotMatch
78	WP_031419310.1	MULTISPECIES:	cytochromecbiogenesisproteinCcsA	Lysinibacillus]	5217.25	M.ADLTMTR.L	ADLTMTR	NotMatch			WP_012295810.1	MULTISPECIES:	DUF1002domain-containingprotein	Lysinibacillus	6837.03	K.FGSLMEDKGFWESVK.T	FGSLMEDKGFWESVK	NotMatch
79	WP_012292559.1	MULTISPECIES:	SNF2-relatedprotein	Lysinibacillus]	5211.42	K.VIIFTEYR.A	VIIFTEYR	NotMatch			WP_012292327.1	MULTISPECIES:	glycosylhydrolasefamily18protein	Lysinibacillus	6823.97	K.DELLLTDNAVDM(oxidationofM)LR.Q	DELLLTDNAVDMLR	NotMatch
80	WP_012291990.1	MULTISPECIES:	nicotinatephosphoribosyltransferase	Lysinibacillus]	5152.32	K.M(oxidationofM)RNIEEVHNMVKQM(oxidationofM).-	MRNIEEVHNMVKQM	NotMatch			WP_012293670.1	MULTISPECIES:	ATP-dependentDNAhelicaseDinG	Lysinibacillus	6803.73	K.GAFIVLDR.R	GAFIVLDR	NotMatch
81	WP_012293646.1	MULTISPECIES:	histidinol-phosphatetransaminase	Lysinibacillus]	5080.25	K.GFIVR.S	GFIVR	NotMatch			WP_012293980.1	MULTISPECIES:	ironuptaketransporterdeferrochelatase/peroxidasesubunit	Lysinibacillus	6788.62	K.ISRRDMLK.L	ISRRDMLK	NotMatch
82	WP_012292898.1	MULTISPECIES:	flagellarhook-associatedproteinFlgK	Lysinibacillus]	4994.91	K.IINGM(oxidationofM)GRVGL.-	IINGMGRVGL	NotMatch			WP_099805356.1	MULTISPECIES:	polyprenylsynthetasefamilyprotein	Lysinibacillus	6631.61	K.SFKEEKIDAGFSFGK.L	SFKEEKIDAGFSFGK	NotMatch
83	WP_008180348.1	MULTISPECIES:	membraneproteininsertionefficiencyfactorYidD	Lysinibacillus]	4981.15	K.HGALKGFILTITRISK.C	HGALKGFILTITRISK	NotMatch			WP_012296123.1	MULTISPECIES:	RNAligasefamilyprotein	Lysinibacillus	6611.64	K.IKRM(oxidationofM)FTGK.S	IKRMFTGK	NotMatch
84	WP_036075119.1	MULTISPECIES:	phageportalprotein	Lysinibacillus]	4920.8	K.NKPGRKGR.Q	NKPGRKGR	NotMatch			WP_036162559.1	MULTISPECIES:	DNAtopoisomeraseIII	Lysinibacillus	6531.78	K.IYDLVVKR.F	IYDLVVKR	NotMatch
85	WP_012295782.1	MULTISPECIES:	RNApolymerasesigmafactorSigB	Lysinibacillus]	4758.4	K.SSSKEDVLK.W	SSSKEDVLK	NotMatch			WP_036161113.1	MULTISPECIES:	BMPfamilyABCtransportersubstrate-bindingprotein	Lysinibacillus	6530.55	R.EAIVAGSIKVSAEK.R	EAIVAGSIKVSAEK	NotMatch
86	WP_036162372.1	MULTISPECIES:	M3familyoligoendopeptidase	Lysinibacillus]	4752.15	-.M(oxidationofM)KTFK.D	MKTFK	NotMatch			WP_012292761.1	MULTISPECIES:	EALdomain-containingprotein	Lysinibacillus	6502.66	R.SKDVPR.C	SKDVPR	NotMatch
87	WP_012293129.1	MULTISPECIES:	DUF420domain-containingprotein	Lysinibacillus]	4722.61	K.TNLKLHR.R	TNLKLHR	NotMatch			WP_012291661.1	MULTISPECIES:	S-4TMfamilyputativepore-formingeffector	Lysinibacillus	6496.81	R.IFFLEIEKRM(oxidationofM)VK.D	IFFLEIEKRMVK	NotMatch
88	WP_012293186.1	MULTISPECIES:	carbamoylphosphatesynthasesmallsubunit	Lysinibacillus]	4647.16	R.GFVVRELAK.T	GFVVRELAK	NotMatch			WP_036162221.1	MULTISPECIES:	ATP-dependentRecD-likeDNAhelicase	Lysinibacillus	6488.24	R.GVVEVYAK.L	GVVEVYAK	NotMatch
89	WP_036162896.1	MULTISPECIES:	aminoacidpermease	Lysinibacillus]	4608.03	K.GRYQQN.-	GRYQQN	NotMatch			WP_036161060.1	MULTISPECIES:	aldehydedehydrogenasefamilyprotein	Lysinibacillus	6455.46	K.EAANTMK.R	EAANTMK	NotMatch
90	WP_158511880.1	MULTISPECIES:	topoisomeraseC-terminalrepeat-containingprotein	Lysinibacillus]	4597.6	K.ELSNKQVR.D	ELSNKQVR	NotMatch			WP_012292039.1	MULTISPECIES:	glycerolkinaseGlpK	Lysinibacillus	6453.42	K.GVSSSQIAGIGITNQR.E	GVSSSQIAGIGITNQR	NotMatch
91	WP_012295287.1	MULTISPECIES:	phagemajortailtubeprotein	Lysinibacillus]	4553.72	K.ATINWR.M	ATINWR	NotMatch			WP_012295382.1	MULTISPECIES:	5'-methylthioadenosine/S-adenosylhomocysteinenucleosidase	Lysinibacillus	6411.8	R.VEAVRHHFPQM(oxidationofM)K.A	VEAVRHHFPQMK	NotMatch
92	WP_012293250.1	MULTISPECIES:	EscU/YscU/HrcUfamilytypeIIIsecretionsystemexportapparatusswitchprotein	Lysinibacillus]	4542.69	R.KNEVF.-	KNEVF	NotMatch			WP_012291841.1	MULTISPECIES:	pyridoxal5'-phosphatesynthaselyasesubunitPdxS	Lysinibacillus	6382.03	R.HIRKVNAQVR.K	HIRKVNAQVR	NotMatch
93	WP_012292623.1	MULTISPECIES:	saccharopinedehydrogenaseNADP-bindingdomain-containingprotein	Lysinibacillus]	4523.86	R.TLEYK.T	TLEYK	NotMatch			WP_012292663.1	MULTISPECIES:	enoyl-CoAhydratase	Lysinibacillus	6328.15	K.NYGIVEYVHEAHEVMER.A	NYGIVEYVHEAHEVMER	NotMatch
94	WP_051563316.1	MULTISPECIES:	glycosyltransferasefamily4protein	Lysinibacillus]	4495.85	R.KQMLYYR.M	KQMLYYR	NotMatch			WP_036160622.1	MULTISPECIES:	APCfamilypermease	Lysinibacillus	6291.31	K.WWREKPTGWMAK.F	WWREKPTGWMAK	NotMatch
95	WP_012292940.1	MULTISPECIES:	fumarylacetoacetatehydrolasefamilyprotein	Lysinibacillus]	4470.57	K.ILSFK.L	ILSFK	NotMatch			WP_012292123.1	MULTISPECIES:	thioredoxin-dependentthiolperoxidase	Lysinibacillus	6275.01	K.LMKAWRK.V	LMKAWRK	NotMatch
96	WP_012293973.1	MULTISPECIES:	ironABCtransporterpermease	Lysinibacillus]	4357.69	K.HYTILR.E	HYTILR	NotMatch			WP_031418636.1	MULTISPECIES:	FtsHproteaseactivitymodulatorHflK	Lysinibacillus	6264.08	K.MITGDEYIVLTDLVVQWK.I	MITGDEYIVLTDLVVQWK	NotMatch
97	WP_012293342.1	MULTISPECIES:	2-oxoacid:acceptoroxidoreductasesubunitalpha	Lysinibacillus]	4335.01	R.GRQIM(oxidationofM)NELLGDR.V	GRQIMNELLGDR	NotMatch			WP_012291890.1	MULTISPECIES:	septumformationinitiatorfamilyprotein	Lysinibacillus	6249.96	K.AINRKQQAR.K	AINRKQQAR	NotMatch
98	WP_051563353.1	MULTISPECIES:	thiaminephosphatesynthase	Lysinibacillus]	4334.86	R.KKM(oxidationofM)ANR.I	KKMANR	NotMatch			WP_012295328.1	MULTISPECIES:	nucleotideexchangefactorGrpE	Lysinibacillusfusiformis	6205.3	K.GIEM(oxidationofM)VYRSLLEATEKEGLQVIK.A	GIEMVYRSLLEATEKEGLQVIK	NotMatch
99	WP_012293121.1	MULTISPECIES:	pyruvatecarboxylase	Lysinibacillus]	4319.25	R.LIVPPTGTK.Q	LIVPPTGTK	NotMatch			WP_012292462.1	MULTISPECIES:	acetamidase/formamidasefamilyprotein	Lysinibacillus	6170.1	K.QIEEALPVSIVGTGK.T	QIEEALPVSIVGTGK	NotMatch
100	WP_012293158.1	MULTISPECIES:	putativelipidIIflippaseFtsW	Lysinibacillus]	4318	K.LYAMIM(oxidationofM)LAGIAGLVGLIATAPYRLKR.I	LYAMIMLAGIAGLVGLIATAPYRLKR	NotMatch			WP_012293240.1	MULTISPECIES:	chromosomesegregationproteinSMC	Lysinibacillus	6156.5	-.MFLKRLEVIGFK.S	MFLKRLEVIGFK	NotMatch
101	WP_012292940.1	MULTISPECIES:	fumarylacetoacetatehydrolasefamilyprotein	Lysinibacillus]	4192.78	R.GKNIPK.N	GKNIPK	NotMatch			WP_036160366.1	MULTISPECIES:	aldehydedehydrogenasefamilyprotein	Lysinibacillus	6150.21	-.MEAVLTLKPQIK.E	MEAVLTLKPQIK	NotMatch
102	WP_012295330.1	MULTISPECIES:	radicalSAMfamilyhemechaperoneHemW	Lysinibacillus]	4165.47	K.NPEGFR.H	NPEGFR	NotMatch			WP_036161804.1	MULTISPECIES:	aconitatehydrataseAcnA	Lysinibacillus	6123.31	R.VVLQDFTGVPVVVDLASLR.S	VVLQDFTGVPVVVDLASLR	NotMatch
103	WP_227256819.1	MULTISPECIES:	N-acetylglucosamine-6-phosphatedeacetylase	Lysinibacillus]	4151.54	K.GAKGIILITDAMR.A	GAKGIILITDAMR	NotMatch			WP_031418351.1	MULTISPECIES:	LysMpeptidoglycan-bindingand3Ddomain-containingprotein	Lysinibacillus	6098.52	K.GGDTLFSIARKNDITVDELK.A	GGDTLFSIARKNDITVDELK	NotMatch
104	WP_012295162.1	MULTISPECIES:	transcriptionalregulator	Lysinibacillus]	4120.35	K.TGKGGRPGR.V	TGKGGRPGR	NotMatch			WP_036162500.1	MULTISPECIES:	tRNAadenosine(34)deaminaseTadA	Lysinibacillus	6092.34	R.DIKAGC[carbamidomethylationofC]VDSLYRILNDAR.F	DIKAGCVDSLYRILNDAR	NotMatch
105	WP_012291848.1	MULTISPECIES:	heavymetaltranslocatingP-typeATPase	Lysinibacillus]	4065.33	K.VGRDTALAQIIK.V	VGRDTALAQIIK	NotMatch			WP_012293446.1	MULTISPECIES:	FAD-dependentmonooxygenase	Lysinibacillus	6058.67	R.KAAHIDVQKQK.H	KAAHIDVQKQK	NotMatch
106	WP_031418785.1	MULTISPECIES:	glycinebetaineABCtransportersubstrate-bindingprotein	Lysinibacillus]	4044.01	K.YLEDPK.G	YLEDPK	NotMatch			WP_241744852.1	MULTISPECIES:	3-hydroxyacyl-CoAdehydrogenase/enoyl-CoAhydratasefamilyprotein	Lysinibacillus	6031.44	K.GLSLEHPAVRNR.L	GLSLEHPAVRNR	NotMatch
107	WP_217580422.1	MULTISPECIES:	phageheadclosureprotein	Lysinibacillus]	4022.75	-.M(oxidationofM)KQFK.Y	MKQFK	NotMatch			WP_054550251.1	MULTISPECIES:	transcriptionalregulatorYeiL	Lysinibacillus	6023.85	R.LC[carbamidomethylationofC]VFLGEKATK.M	LCVFLGEKATK	NotMatch
108	WP_031419598.1	MULTISPECIES:	DUF1659domain-containingprotein	Lysinibacillus]	3981.44	K.QETSELS.-	QETSELS	NotMatch			WP_012293206.1	MULTISPECIES:	primosomalproteinN'	Lysinibacillus	6019.74	K.QGILM(oxidationofM)TVDLDPSTI.-	QGILMTVDLDPSTI	NotMatch
109	WP_012293022.1	MULTISPECIES:	B12-bindingdomain-containingradicalSAMprotein	Lysinibacillus]	3981.15	K.IKEDIR.F	IKEDIR	NotMatch			WP_012295121.1	MULTISPECIES:	C39familypeptidase	Lysinibacillus	5950.63	K.FDKWFSK.W	FDKWFSK	NotMatch
110	WP_012292434.1	MULTISPECIES:	universalstressprotein	Lysinibacillus]	3934.45	K.YVSIEGIFFK.E	YVSIEGIFFK	NotMatch			WP_012293860.1	MULTISPECIES:	hydantoinaseB/oxoprolinasefamilyprotein	Lysinibacillus	5939.11	K.GELNEAIYEIISTNVR.L	GELNEAIYEIISTNVR	NotMatch
111	WP_012292275.1	MULTISPECIES:	HNHendonuclease	Lysinibacillus]	3934.06	K.RLVKNNNPR.N	RLVKNNNPR	NotMatch			WP_036162548.1	MULTISPECIES:	xanthinephosphoribosyltransferase	Lysinibacillus	5903.73	R.EQGVRVESLAIVDSLEDGK.V	EQGVRVESLAIVDSLEDGK	NotMatch
112	WP_012293646.1	MULTISPECIES:	histidinol-phosphatetransaminase	Lysinibacillus]	3880.86	K.LDPVR.G	LDPVR	NotMatch			WP_012293597.1	MULTISPECIES:	YpdAfamilyputativebacillithioldisulfidereductase	Lysinibacillus	5855.34	K.VMKNDFVFAM(oxidationofM)TGYHPDHSFIK.A	VMKNDFVFAMTGYHPDHSFIK	NotMatch
113	WP_012295848.1	MULTISPECIES:	sodium/prolinesymporterPutP	Lysinibacillus]	3878.92	R.LRDHTK.L	LRDHTK	NotMatch			WP_012292910.1	MULTISPECIES:	sulfatase-likehydrolase/transferase	Lysinibacillus	5850.8	K.NLGATSVLSPYDPNK.I	NLGATSVLSPYDPNK	NotMatch
114	WP_012293317.1	MULTISPECIES:	4-hydroxy-tetrahydrodipicolinatesynthase	Lysinibacillus]	3862.15	K.ENFDKIWDTYQEK.A	ENFDKIWDTYQEK	NotMatch			WP_012293269.1	MULTISPECIES:	flagellarFlbDfamilyprotein	Lysinibacillus	5834.96	-.MIELTRLNGK.A	MIELTRLNGK	NotMatch
115	WP_036161224.1	MULTISPECIES:	DnaDdomain-containingprotein	Lysinibacillus]	3795.01	-.M(oxidationofM)NANNHR.L	MNANNHR	NotMatch			WP_012292153.1	MULTISPECIES:	YafYfamilytranscriptionalregulator	Lysinibacillus	5817.2	R.LLTMIMILINRK.K	LLTMIMILINRK	NotMatch
116	WP_012293243.1	MULTISPECIES:	signalrecognitionparticleprotein	Lysinibacillus]	3723.92	K.VSEQDVKEM(oxidationofM)M(oxidationofM)R.E	VSEQDVKEMMR	NotMatch			WP_217580665.1	MULTISPECIES:	cytochromecbiogenesisproteinResB	Lysinibacillus	5809.69	K.VKDYSIRVNHPLK.E	VKDYSIRVNHPLK	NotMatch
117	WP_012291903.1	MULTISPECIES:	aminodeoxychorismate/anthranilatesynthasecomponentII	Lysinibacillus]	3713.65	R.AERLM(oxidationofM)HGK.T	AERLMHGK	NotMatch			WP_012295216.1	MULTISPECIES:	deoxyribonucleaseIV	Lysinibacillus	5801.23	R.KAIADLNIMNGRLHMK.E	KAIADLNIMNGRLHMK	NotMatch
118	WP_206701050.1	MULTISPECIES:	1-acyl-sn-glycerol-3-phosphateacyltransferase	Lysinibacillus]	3499.15	K.AQIVPAAYVGAR.N	AQIVPAAYVGAR	NotMatch			WP_036161220.1	MULTISPECIES:	asparagine--tRNAligase	Lysinibacillus	5791.46	K.APFPRISYDDAIK.L	APFPRISYDDAIK	NotMatch
119	WP_012295365.1	MULTISPECIES:	30SribosomalproteinS20	Lysinibacillus]	3492.3	K.QELLQAAFK.S	QELLQAAFK	NotMatch			WP_229389906.1	MULTISPECIES:	trypsin-likepeptidasedomain-containingprotein	Lysinibacillus	5787.43	K.KIGDTLTM(oxidationofM)KVYR.E	KIGDTLTMKVYR	NotMatch
120	WP_012295282.1	MULTISPECIES:	bacteriophageregulatoryprotein	Lysinibacillus]	3469.83	K.QEAKYYIRR.K	QEAKYYIRR	NotMatch			WP_206701034.1	MULTISPECIES:	ATP-graspdomain-containingprotein	Lysinibacillus	5736.32	K.AIVFIGTNKSGSSR.E	AIVFIGTNKSGSSR	NotMatch
121	WP_036161093.1	MULTISPECIES:	acryloyl-CoAreductase	Lysinibacillus]	3458.34	K.VSYSGINYK.D	VSYSGINYK	NotMatch			WP_054550251.1	MULTISPECIES:	transcriptionalregulatorYeiL	Lysinibacillus	5734.87	R.LC[carbamidomethylationofC]VFLGEKATK.M	LCVFLGEKATK	NotMatch
122	WP_031416324.1	MULTISPECIES:	CPBPfamilyintramembranemetalloprotease	Lysinibacillus]	3446.15	R.ILTVTNSPK.V	ILTVTNSPK	NotMatch			WP_012293541.1	MULTISPECIES:	S-layerhomologydomain-containingprotein	Lysinibacillus	5732.94	R.YTLSGKTLTIK.G	YTLSGKTLTIK	NotMatch
123	WP_227256924.1	MULTISPECIES:	ribonucleaseHII	Lysinibacillus]	3386.26	K.SM(oxidationofM)FE.-	SMFE	NotMatch			WP_036161804.1	MULTISPECIES:	aconitatehydrataseAcnA	Lysinibacillus	5689.28	K.VTQVLR.Q	VTQVLR	NotMatch
124	WP_227256876.1	MULTISPECIES:	KRdomain-containingprotein	Lysinibacillus]	3382.75	K.TMNFTLILDDK.K	TMNFTLILDDK	NotMatch			WP_107921989.1	MULTISPECIES:	ArdC-likessDNA-bindingdomain-containingprotein	Lysinibacillus	5643.18	K.KYTAKTAEEK.Q	KYTAKTAEEK	NotMatch
125	WP_036225403.1	MULTISPECIES:	nucleosidedeaminase	Lysinibacillus]	3381.72	K.DKSVLNMHK.M	DKSVLNMHK	NotMatch			WP_031419221.1	MULTISPECIES:	DNApolymeraseIIIsubunitdelta	Lysinibacillus	5636.77	-.MISTVWK.T	MISTVWK	NotMatch
126											WP_012292541.1	MULTISPECIES:	M20/M25/M40familymetallo-hydrolase	Lysinibacillus	5630.58	K.IIEYIYAK.M	IIEYIYAK	NotMatch
127											WP_012292025.1	MULTISPECIES:	NAD-dependentDNAligaseLigA	Lysinibacillus	5609.71	R.VGGTVVEGFK.K	VGGTVVEGFK	NotMatch
128											WP_216604599.1	MULTISPECIES:	RNApolymerasesigmafactorSigX	Lysinibacillus	5597.98	R.EQEAKR.Q	EQEAKR	NotMatch
129											WP_012292171.1	MULTISPECIES:	HADfamilyhydrolase	Lysinibacillus	5562.4	K.GLSALGIEDAK.F	GLSALGIEDAK	NotMatch
130											WP_031415838.1	MULTISPECIES:	sporeproteaseYyaC	Lysinibacillus	5506.05	K.AVKKELPPIGDISIK.G	AVKKELPPIGDISIK	NotMatch
131											WP_012295891.1	MULTISPECIES:	Rrf2familytranscriptionalregulator	Lysinibacillus	5435.95	R.GRGGGIRLAIDPK.S	GRGGGIRLAIDPK	NotMatch
132											WP_012295199.1	MULTISPECIES:	O-linkedGlcNActransferase	Lysinibacillus	5414.42	K.TGTANEK.A	TGTANEK	NotMatch
133											WP_012292233.1	MULTISPECIES:	YvcKfamilyprotein	Lysinibacillus	5292.63	K.VHGRVIPAANKK.I	VHGRVIPAANKK	NotMatch
134											WP_025218805.1	MULTISPECIES:	1-deoxy-D-xylulose-5-phosphatereductoisomerase	Lysinibacillus	5259.19	R.IMQAHNNVSVPDLQTILHVDR.E	IMQAHNNVSVPDLQTILHVDR	NotMatch
135											WP_206701034.1	MULTISPECIES:	ATP-graspdomain-containingprotein	Lysinibacillus	5237.74	-.MKAIVFIGTNK.S	MKAIVFIGTNK	NotMatch
136											WP_012295562.1	MULTISPECIES:	succinatedehydrogenaseflavoproteinsubunit	Lysinibacillus	5205.24	R.TPEGLLDFR.R	TPEGLLDFR	NotMatch
137											WP_036161912.1	MULTISPECIES:	MerRfamilytranscriptionalregulator	Lysinibacillus	5178.26	R.QSPLLTTLPAGK.Y	QSPLLTTLPAGK	NotMatch
138											WP_012292678.1	MULTISPECIES:	pyridoxalphosphate-dependentaminotransferase	Lysinibacillus	5160.25	K.VNNALEEGR.D	VNNALEEGR	NotMatch
139											WP_063389783.1	MULTISPECIES:	YheC/YheDfamilyprotein	Lysinibacillus	5102.1	R.KVGEYIYK.V	KVGEYIYK	NotMatch
140											WP_126657706.1	MULTISPECIES:	ribosomebiogenesisGTPaseDer	Lysinibacillus	5086.61	K.KIAGYAHEAGK.A	KIAGYAHEAGK	NotMatch
141											WP_012295242.1	MULTISPECIES:	RNApolymerasesigmafactorRpoD	Lysinibacillus	5062.01	K.AVEKFDYRK.G	AVEKFDYRK	NotMatch

## Sheet: T50M
Top 50% Protein from Matched set of SB & TB with their fold change
SB	Protein#	Species coverage	Functions	Organism	Total Intensity	PeptideSequence	BasePeptideSequence	SBvsTB	Function Match status	Fold Change (%)	TB	Protein#	Species coverage	Functions	Organism	Total Intensity	PeptideSequence	BasePeptideSequence	TBvsSB
	WP_012292076.1	MULTISPECIES:	SMCfamilyATPase	Lysinibacillus	473.961	K.QSGLGLDVYDAYTDQLR.D	QSGLGLDVYDAYTDQLR	SMCfamilyATPase	TRUE	16.299		WP_012292076.1	MULTISPECIES:	SMCfamilyATPase	Lysinibacillus	8199.04	K.QMPTNIPTLPQLK.Q	QMPTNIPTLPQLK	SMCfamilyATPase
	WP_036161772.1	MULTISPECIES:	TatDfamilyhydrolase	Lysinibacillus	2175.9	K.GDEAVMKRMIR.R	GDEAVMKRMIR	TatDfamilyhydrolase	TRUE	15.7891		WP_036160348.1	MULTISPECIES:	TatDfamilyhydrolase	Lysinibacillus	36531.4	K.INLPIIIHNR.D	INLPIIIHNR	TatDfamilyhydrolase
	WP_025113922.1	MULTISPECIES:	ADP-formingsuccinate--CoAligasesubunitbeta	Lysinibacillus	1811.55	R.LEGTNVELGK.E	LEGTNVELGK	ADP-formingsuccinate--CoAligasesubunitbeta	TRUE	9.40279		WP_025113922.1	MULTISPECIES:	ADP-formingsuccinate--CoAligasesubunitbeta	Lysinibacillus	18845.2	K.VAKELGSNVTVVK.A	VAKELGSNVTVVK	ADP-formingsuccinate--CoAligasesubunitbeta
	WP_012293531.1	MULTISPECIES:	chitobiase/beta-hexosaminidaseC-terminaldomain-containingprotein	Lysinibacillus	1394.07	K.AHLQQEVTHLQPVADK.L	AHLQQEVTHLQPVADK	chitobiase/beta-hexosaminidaseC-terminaldomain-containingprotein	TRUE	7.79959		WP_012293531.1	MULTISPECIES:	chitobiase/beta-hexosaminidaseC-terminaldomain-containingprotein	Lysinibacillus	12267.3	K.VGDRVLVQGK.V	VGDRVLVQGK	chitobiase/beta-hexosaminidaseC-terminaldomain-containingprotein
	WP_012293213.1	MULTISPECIES:	ribosomesmallsubunit-dependentGTPaseA	Lysinibacillus	1791.85	R.GRGVFRNR.G	GRGVFRNR	ribosomesmallsubunit-dependentGTPaseA	TRUE	7.09242		WP_012293213.1	MULTISPECIES:	ribosomesmallsubunit-dependentGTPaseA	Lysinibacillus	14500.4	K.TGIISQSLGRGK.H	TGIISQSLGRGK	ribosomesmallsubunit-dependentGTPaseA
	WP_115674134.1	MULTISPECIES:	alanine--tRNAligase	Lysinibacillus	1765.43	R.RM(oxidationofM)YLEFFKEK.G	RMYLEFFKEK	alanine--tRNAligase	TRUE	6.76608		WP_126657206.1	MULTISPECIES:	alanine--tRNAligase	Lysinibacillus	13710.5	R.ITNAQK.S	ITNAQK	alanine--tRNAligase
	WP_031419316.1	MULTISPECIES:	endopeptidaseLa	Lysinibacillus	1830.16	K.TGEVAELRK.S	TGEVAELRK	endopeptidaseLa	TRUE	6.4821		WP_031419316.1	MULTISPECIES:	endopeptidaseLa	Lysinibacillus	13693.4	K.LPNGTLRILVEGVAR.A	LPNGTLRILVEGVAR	endopeptidaseLa
	WP_031418882.1	MULTISPECIES:	nitronatemonooxygenasefamilyprotein	Lysinibacillus	2811.96	R.ALRNEFTAK.I	ALRNEFTAK	nitronatemonooxygenasefamilyprotein	TRUE	6.32159		WP_031418882.1	MULTISPECIES:	nitronatemonooxygenasefamilyprotein	Lysinibacillus	20588	K.RSIGAPARALR.N	RSIGAPARALR	nitronatemonooxygenasefamilyprotein
	WP_012292091.1	MULTISPECIES:	YihY/virulencefactorBrkBfamilyprotein	Lysinibacillus	2077.9	R.ALQKEINR.-	ALQKEINR	YihY/virulencefactorBrkBfamilyprotein	TRUE	5.8962		WP_012292091.1	MULTISPECIES:	YihY/virulencefactorBrkBfamilyprotein	Lysinibacillus	14329.6	K.GFVQDLIGRVKR.V	GFVQDLIGRVKR	YihY/virulencefactorBrkBfamilyprotein
	WP_155593039.1	MULTISPECIES:	30SribosomalproteinS7	Lysinibacillus	4169.57	K.AFAHYRW.-	AFAHYRW	30SribosomalproteinS7	TRUE	4.41383		WP_155593039.1	MULTISPECIES:	30SribosomalproteinS7	Lysinibacillus	22573.4	R.GEKTMEER.L	GEKTMEER	30SribosomalproteinS7
	WP_008181711.1	MULTISPECIES:	30SribosomalproteinS5	Lysinibacillus	1659.66	K.SLGSNTPINM(oxidationofM)VR.A	SLGSNTPINMVR	30SribosomalproteinS5	TRUE	4.34343		WP_008181711.1	MULTISPECIES:	30SribosomalproteinS5	Lysinibacillus	8868.29	R.AVLELAGITDILSK.S	AVLELAGITDILSK	30SribosomalproteinS5
	WP_036161568.1	MULTISPECIES:	S9familypeptidase	Lysinibacillus	1663.45	K.QGIQPEDLYR.L	QGIQPEDLYR	S9familypeptidase	TRUE	4.0802		WP_012292240.1	MULTISPECIES:	S9familypeptidase	Lysinibacillus	8450.65	R.QQIKDQWVK.A	QQIKDQWVK	S9familypeptidase
	WP_025116775.1	MULTISPECIES:	celldivisionATP-bindingproteinFtsE	Lysinibacillus	1258.06	K.ARM(oxidationofM)FPNELSGGEQQR.V	ARMFPNELSGGEQQR	celldivisionATP-bindingproteinFtsE	TRUE	4.03637		WP_025116775.1	MULTISPECIES:	celldivisionATP-bindingproteinFtsE	Lysinibacillus	6336.07	R.VSIARSIVNVPK.V	VSIARSIVNVPK	celldivisionATP-bindingproteinFtsE
	WP_012295794.1	MULTISPECIES:	DEAD/DEAHboxhelicase	Lysinibacillus	1189.46	K.NPNIQALVIAPTR.E	NPNIQALVIAPTR	DEAD/DEAHboxhelicase	TRUE	3.5745		WP_031418523.1	MULTISPECIES:	DEAD/DEAHboxhelicase	Lysinibacillus	5441.19	M.MTINANSPSPFSKTQQLRIDVAR.E	MTINANSPSPFSKTQQLRIDVAR	DEAD/DEAHboxhelicase
	WP_089984933.1	MULTISPECIES:	Murligasefamilyprotein	Lysinibacillus	1805.05	K.GM(oxidationofM)NFKLHHNRK.I	GMNFKLHHNRK	Murligasefamilyprotein	TRUE	3.39233		WP_012293956.1	MULTISPECIES:	Murligasefamilyprotein	Lysinibacillus	7928.38	K.IIDENTIVLIKGDM(oxidationofM)YSEQVSK.L	IIDENTIVLIKGDMYSEQVSK	Murligasefamilyprotein
	WP_036162031.1	MULTISPECIES:	biosynthetic-typeacetolactatesynthaselargesubunit	Lysinibacillus	3773.37	K.ADLLLNIGAR.F	ADLLLNIGAR	biosynthetic-typeacetolactatesynthaselargesubunit	TRUE	3.22276		WP_036162031.1	MULTISPECIES:	biosynthetic-typeacetolactatesynthaselargesubunit	Lysinibacillus	15934	K.ADLLLNIGAR.F	ADLLLNIGAR	biosynthetic-typeacetolactatesynthaselargesubunit
	WP_012295403.1	MULTISPECIES:	tetratricopeptiderepeatprotein	Lysinibacillus	1561.17	R.AERFFQK.A	AERFFQK	tetratricopeptiderepeatprotein	TRUE	3.21607		WP_227256887.1	MULTISPECIES:	tetratricopeptiderepeatprotein	Lysinibacillus	6581.99	K.SASLMSK.N	SASLMSK	tetratricopeptiderepeatprotein
	WP_012295386.1	MULTISPECIES:	U32familypeptidase	Lysinibacillus	3243.54	M.ALALEQNDK.I	ALALEQNDK	U32familypeptidase	TRUE	3.1201		WP_036162215.1	MULTISPECIES:	U32familypeptidase	Lysinibacillus	13363.7	K.RPLLGHYFLYQDKVMEIENRK.D	RPLLGHYFLYQDKVMEIENRK	U32familypeptidase
	WP_036161940.1	MULTISPECIES:	TetR/AcrRfamilytranscriptionalregulator	Lysinibacillus	2142.74	R.IVQIEEQR.I	IVQIEEQR	TetR/AcrRfamilytranscriptionalregulator	TRUE	3.0763		WP_031418674.1	MULTISPECIES:	TetR/AcrRfamilytranscriptionalregulator	Lysinibacillus	8734.44	-.MARGRK.F	MARGRK	TetR/AcrRfamilytranscriptionalregulator
	WP_012295476.1	MULTISPECIES:	valine--tRNAligase	Lysinibacillus	1589.29	R.WMENIRDWC[carbamidomethylationofC]ISR.Q	WMENIRDWCISR	valine--tRNAligase	TRUE	2.97066		WP_012295476.1	MULTISPECIES:	valine--tRNAligase	Lysinibacillus	6310.52	K.QIVADLQEAGVLIR.I	QIVADLQEAGVLIR	valine--tRNAligase
	WP_206701081.1	MULTISPECIES:	RNApolymerasesigmafactor	Lysinibacillus	3491.55	R.EIAEILK.I	EIAEILK	RNApolymerasesigmafactor	TRUE	2.86397		WP_031416685.1	MULTISPECIES:	RNApolymerasesigmafactor	Lysinibacillus	13491.3	R.LHKALKIMR.K	LHKALKIMR	RNApolymerasesigmafactor
	WP_206701011.1	MULTISPECIES:	LytTRfamilytranscriptionalregulator	Lysinibacillus	1873.73	K.HDQVIYLETQLR.K	HDQVIYLETQLR	LytTRfamilytranscriptionalregulator	TRUE	2.73696		WP_036160581.1	MULTISPECIES:	LytTRfamilytranscriptionalregulator	Lysinibacillus	7002.07	K.VSHIESLQK.K	VSHIESLQK	LytTRfamilytranscriptionalregulator
	WP_012291949.1	MULTISPECIES:	DUF4132domain-containingprotein	Lysinibacillus	4400.04	K.ELILTTK.D	ELILTTK	DUF4132domain-containingprotein	TRUE	2.64212		WP_012291949.1	MULTISPECIES:	DUF4132domain-containingprotein	Lysinibacillus	16025.5	R.SDAYPPSSR.I	SDAYPPSSR	DUF4132domain-containingprotein
	WP_206700908.1	MULTISPECIES:	RloBdomain-containingprotein	Lysinibacillus	2232.85	K.MEQHLGVSR.Y	MEQHLGVSR	RloBdomain-containingprotein	TRUE	2.55729		WP_206700908.1	MULTISPECIES:	RloBdomain-containingprotein	Lysinibacillus	7942.91	R.SKM(oxidationofM)VSVKIK.N	SKMVSVKIK	RloBdomain-containingprotein
	WP_036160583.1	MULTISPECIES:	HAMPdomain-containinghistidinekinase	Lysinibacillus	4215.02	R.FYRADTSR.T	FYRADTSR	HAMPdomain-containinghistidinekinase	TRUE	2.51304		WP_227256932.1	MULTISPECIES:	HAMPdomain-containinghistidinekinase	Lysinibacillus	14807.5	K.GLKTQLEEVFTK.S	GLKTQLEEVFTK	HAMPdomain-containinghistidinekinase
	WP_012293299.1	MULTISPECIES:	proline--tRNAligase	Lysinibacillus	2535.36	R.DEKRPR.F	DEKRPR	proline--tRNAligase	TRUE	2.44132		WP_012293299.1	MULTISPECIES:	proline--tRNAligase	Lysinibacillus	8724.97	R.VTVGKKATEGIVEVK.F	VTVGKKATEGIVEVK	proline--tRNAligase
	WP_036162758.1	MULTISPECIES:	bileacid:sodiumsymporter	Lysinibacillus	3484.41	M.IARETLER.N	IARETLER	bileacid:sodiumsymporter	TRUE	2.42887		WP_036162758.1	MULTISPECIES:	bileacid:sodiumsymporter	Lysinibacillus	11947.6	K.HIGKRFK.L	HIGKRFK	bileacid:sodiumsymporter
	WP_036162077.1	MULTISPECIES:	alpha/betahydrolase	Lysinibacillus	2168.41	K.VPHFNHKDTYQK.M	VPHFNHKDTYQK	alpha/betahydrolase	TRUE	2.36076		WP_171821101.1	MULTISPECIES:	alpha/betahydrolase	Lysinibacillus	7287.51	R.AQAKEIVDSLREFM(oxidationofM)K.V	AQAKEIVDSLREFMK	alpha/betahydrolase
	WP_036160877.1	MULTISPECIES:	Ppx/GppAfamilyphosphatase	Lysinibacillus	2775.38	R.FAAPFATWM(oxidationofM)NR.E	FAAPFATWMNR	Ppx/GppAfamilyphosphatase	TRUE	2.32117		WP_036160877.1	MULTISPECIES:	Ppx/GppAfamilyphosphatase	Lysinibacillus	9217.52	K.FVYALNVSK.R	FVYALNVSK	Ppx/GppAfamilyphosphatase
	WP_036161492.1	MULTISPECIES:	Ger(x)Cfamilysporegerminationprotein	Lysinibacillus	2341.76	R.LVYASAFDLELDEK.I	LVYASAFDLELDEK	Ger(x)Cfamilysporegerminationprotein	TRUE	2.14854		WP_012294060.1	MULTISPECIES:	Ger(x)Cfamilysporegerminationprotein	Lysinibacillus	7373.13	K.NGFKGFIK.G	NGFKGFIK	Ger(x)Cfamilysporegerminationprotein
	WP_012292704.1	MULTISPECIES:	lipoate--proteinligasefamilyprotein	Lysinibacillus	1349.75	K.SILQQPIWR.Y	SILQQPIWR	lipoate--proteinligasefamilyprotein	TRUE	2.0794		WP_031417388.1	MULTISPECIES:	lipoate--proteinligasefamilyprotein	Lysinibacillus	4156.43	K.IAGSAQTRQK.G	IAGSAQTRQK	lipoate--proteinligasefamilyprotein
	WP_036121380.1	MULTISPECIES:	riboflavinbiosynthesisproteinRibF	Lysinibacillus	2765.16	R.ALSNGEYGVTIVEK.K	ALSNGEYGVTIVEK	riboflavinbiosynthesisproteinRibF	TRUE	2.06073		WP_229388779.1	MULTISPECIES:	riboflavinbiosynthesisproteinRibF	Lysinibacillus	8463.4	R.MLLGRPFEIK.G	MLLGRPFEIK	riboflavinbiosynthesisproteinRibF
	WP_012292313.1	MULTISPECIES:	acyl-CoAdehydrogenasefamilyprotein	Lysinibacillus	2804.42	R.TFNGVSVGPEEK.K	TFNGVSVGPEEK	acyl-CoAdehydrogenasefamilyprotein	TRUE	1.99012		WP_036160686.1	MULTISPECIES:	acyl-CoAdehydrogenasefamilyprotein	Lysinibacillus	8385.57	R.LLVYRVGELKNK.G	LLVYRVGELKNK	acyl-CoAdehydrogenasefamilyprotein
	WP_107921778.1	MULTISPECIES:	riboflavinsynthase	Lysinibacillus	2477.36	R.ELTM(oxidationofM)DVMPETVK.A	ELTMDVMPETVK	riboflavinsynthase	TRUE	1.94267		WP_053595319.1	MULTISPECIES:	riboflavinsynthase	Lysinibacillus	7290.05	K.ESMKITVISSK.M	ESMKITVISSK	riboflavinsynthase
	WP_068983729.1	MULTISPECIES:	histidine--tRNAligase	Lysinibacillus	1388.09	K.GISAEMDYLDRKM(oxidationofM)K.A	GISAEMDYLDRKMK	histidine--tRNAligase	TRUE	1.82774		WP_068983729.1	MULTISPECIES:	histidine--tRNAligase	Lysinibacillus	3925.16	K.TVELTSTFR.A	TVELTSTFR	histidine--tRNAligase
	WP_012292010.1	MULTISPECIES:	adenylosuccinatelyase	Lysinibacillus	1631.9	R.NPIGSENM(oxidationofM)VGM(oxidationofM)SR.L	NPIGSENMVGMSR	adenylosuccinatelyase	TRUE	1.81697		WP_012292010.1	MULTISPECIES:	adenylosuccinatelyase	Lysinibacillus	4597.02	K.RNPIGSENMVGMSRLM(oxidationofM)R.G	RNPIGSENMVGMSRLMR	adenylosuccinatelyase
	WP_232901020.1	MULTISPECIES:	cellwall-bindingprotein	Lysinibacillus	5326.13	K.KLVSNIK.D	KLVSNIK	cellwall-bindingprotein	TRUE	1.80165		WP_232901020.1	MULTISPECIES:	cellwall-bindingprotein	Lysinibacillus	14922	K.ILKAYDK.L	ILKAYDK	cellwall-bindingprotein
	WP_012292331.1	MULTISPECIES:	cysteinedesulfurase	Lysinibacillus	2530.7	K.KEHLEK.M	KEHLEK	cysteinedesulfurase	TRUE	1.75139		WP_012295775.1	MULTISPECIES:	cysteinedesulfurase	Lysinibacillus	6962.93	R.VPALTPGVTHER.G	VPALTPGVTHER	cysteinedesulfurase
	WP_012296155.1	MULTISPECIES:	malate:quinoneoxidoreductase	Lysinibacillus	4891.96	R.M(oxidationofM)LIDHLKAK.D	MLIDHLKAK	malate:quinoneoxidoreductase	TRUE	1.7055		WP_012296155.1	MULTISPECIES:	malate:quinoneoxidoreductase	Lysinibacillus	13235.2	R.M(oxidationofM)LIDHLKAK.D	MLIDHLKAK	malate:quinoneoxidoreductase
	WP_031418843.1	MULTISPECIES:	TrkAfamilypotassiumuptakeprotein	Lysinibacillus	11120	K.KEFAVIGLGR.F	KEFAVIGLGR	TrkAfamilypotassiumuptakeprotein	TRUE	1.65938		WP_031418843.1	MULTISPECIES:	TrkAfamilypotassiumuptakeprotein	Lysinibacillus	29572.3	M.KKEFAVIGLGR.F	KKEFAVIGLGR	TrkAfamilypotassiumuptakeprotein
	WP_012293093.1	MULTISPECIES:	pyruvatedehydrogenase(acetyl-transferring)E1componentsubunitalpha	Lysinibacillus	1946.76	K.VTELMENMYK.G	VTELMENMYK	pyruvatedehydrogenase(acetyl-transferring)E1componentsubunitalpha	TRUE	1.65783		WP_012293093.1	MULTISPECIES:	pyruvatedehydrogenase(acetyl-transferring)E1componentsubunitalpha	Lysinibacillus	5174.17	K.LSDEELVELM(oxidationofM)TR.M	LSDEELVELMTR	pyruvatedehydrogenase(acetyl-transferring)E1componentsubunitalpha
	WP_012295698.1	MULTISPECIES:	DUF4479domain-containingtRNA-bindingprotein	Lysinibacillus	3190.33	R.AGDIAILK.E	AGDIAILK	DUF4479domain-containingtRNA-bindingprotein	TRUE	1.61905		WP_012295698.1	MULTISPECIES:	DUF4479domain-containingtRNA-bindingprotein	Lysinibacillus	8355.63	K.IGAVMPSGMLIK.E	IGAVMPSGMLIK	DUF4479domain-containingtRNA-bindingprotein
	WP_012296051.1	MULTISPECIES:	50SribosomalproteinL17	Lysinibacillus	2930.92	R.DLATDLIINER.I	DLATDLIINER	50SribosomalproteinL17	TRUE	1.61033		WP_012296051.1	MULTISPECIES:	50SribosomalproteinL17	Lysinibacillus	7650.66	R.DLATDLIINER.I	DLATDLIINER	50SribosomalproteinL17
	WP_031415820.1	MULTISPECIES:	responseregulatorYycF	Lysinibacillus	3179.25	K.HIGQVM(oxidationofM)TR.E	HIGQVMTR	responseregulatorYycF	TRUE	1.58723		WP_031415820.1	MULTISPECIES:	responseregulatorYycF	Lysinibacillus	8225.47	R.VKANM(oxidationofM)R.R	VKANMR	responseregulatorYycF
	WP_031416573.1	MULTISPECIES:	C40familypeptidase	Lysinibacillus	2263.17	K.ATLDEKQK.E	ATLDEKQK	C40familypeptidase	TRUE	1.58405		WP_031416573.1	MULTISPECIES:	C40familypeptidase	Lysinibacillus	5848.15	K.KAEIDAQVKK.L	KAEIDAQVKK	C40familypeptidase
	WP_205447410.1	MULTISPECIES:	aminotransferaseclassIII-foldpyridoxalphosphate-dependentenzyme	Lysinibacillus	2912.49	R.VLQFKPGLLC[carbamidomethylationofC]DK.A	VLQFKPGLLCDK	aminotransferaseclassIII-foldpyridoxalphosphate-dependentenzyme	TRUE	1.5599		WP_205447410.1	MULTISPECIES:	aminotransferaseclassIII-foldpyridoxalphosphate-dependentenzyme	Lysinibacillus	7455.68	R.VLQFKPGLLC[carbamidomethylationofC]DK.A	VLQFKPGLLCDK	aminotransferaseclassIII-foldpyridoxalphosphate-dependentenzyme
	WP_008179143.1	MULTISPECIES:	DUF2639domain-containingprotein	Lysinibacillus	3537.5	-.MDSVHKYSK.G	MDSVHKYSK	DUF2639domain-containingprotein	TRUE	1.52088		WP_080695228.1	MULTISPECIES:	DUF2639domain-containingprotein	Lysinibacillus	8917.61	R.AYGILVHPQLK.S	AYGILVHPQLK	DUF2639domain-containingprotein
	WP_012293859.1	MULTISPECIES:	hydantoinase/oxoprolinasefamilyprotein	Lysinibacillus	2258.81	K.EYREYER.T	EYREYER	hydantoinase/oxoprolinasefamilyprotein	TRUE	1.49973		WP_012293986.1	MULTISPECIES:	hydantoinase/oxoprolinasefamilyprotein	Lysinibacillus	5646.41	K.VVGKM(oxidationofM)V.-	VVGKMV	hydantoinase/oxoprolinasefamilyprotein
	WP_031416550.1	MULTISPECIES:	GTPaseHflX	Lysinibacillus	2266.74	K.EVDVLIEK.A	EVDVLIEK	GTPaseHflX	TRUE	1.48001		WP_031416550.1	MULTISPECIES:	GTPaseHflX	Lysinibacillus	5621.53	R.KIEDQIAK.I	KIEDQIAK	GTPaseHflX
	WP_012292453.1	MULTISPECIES:	VanZfamilyprotein	Lysinibacillus	4343.81	R.KYSYLSMSK.T	KYSYLSMSK	VanZfamilyprotein	TRUE	1.40934		WP_012294785.1	MULTISPECIES:	VanZfamilyprotein	Lysinibacillus	10465.7	R.HKQIPVKK.L	HKQIPVKK	VanZfamilyprotein
	WP_012292862.1	MULTISPECIES:	Ficfamilyprotein	Lysinibacillus	1813.4	K.LVSKGRNAC[carbamidomethylationofC]WM(oxidationofM)K.V	LVSKGRNACWMK	Ficfamilyprotein	TRUE	1.37592		WP_012292862.1	MULTISPECIES:	Ficfamilyprotein	Lysinibacillus	4308.49	R.VTIM(oxidationofM)LMQLLLIK.S	VTIMLMQLLLIK	Ficfamilyprotein
	WP_036162603.1	MULTISPECIES:	PolC-typeDNApolymeraseIII	Lysinibacillus	1289	K.TAYGYVK.G	TAYGYVK	PolC-typeDNApolymeraseIII	TRUE	1.36458		WP_036162603.1	MULTISPECIES:	PolC-typeDNApolymeraseIII	Lysinibacillus	3047.95	K.ITLAC[carbamidomethylationofC]MQEM(oxidationofM)EFM(oxidationofM)M(oxidationofM)LKTK.Y	ITLACMQEMEFMMLKTK	PolC-typeDNApolymeraseIII
	WP_031417420.1	MULTISPECIES:	glycerophosphodiesterphosphodiesterase	Lysinibacillus	1783.44	K.LVSDC[carbamidomethylationofC]TM(oxidationofM)EELLR.F	LVSDCTMEELLR	glycerophosphodiesterphosphodiesterase	TRUE	1.3507		WP_012292636.1	MULTISPECIES:	glycerophosphodiesterphosphodiesterase	Lysinibacillus	4192.33	K.GIHVSLPTAYR.K	GIHVSLPTAYR	glycerophosphodiesterphosphodiesterase
	WP_197148452.1	MULTISPECIES:	isoleucine--tRNAligase	Lysinibacillus	2940.75	R.SIRNSQGMKVK.Q	SIRNSQGMKVK	isoleucine--tRNAligase	TRUE	1.33413		WP_197148452.1	MULTISPECIES:	isoleucine--tRNAligase	Lysinibacillus	6864.09	R.SIRNSQGMKVK.Q	SIRNSQGMKVK	isoleucine--tRNAligase
	WP_012292914.1	MULTISPECIES:	flagellarexportchaperoneFliS	Lysinibacillus	2174.67	-.M(oxidationofM)AANLTAQNAYK.Q	MAANLTAQNAYK	flagellarexportchaperoneFliS	TRUE	1.28148		WP_012292914.1	MULTISPECIES:	flagellarexportchaperoneFliS	Lysinibacillus	4961.45	K.QM(oxidationofM)LPLYEYMNHR.L	QMLPLYEYMNHR	flagellarexportchaperoneFliS
	WP_012295327.1	MULTISPECIES:	molecularchaperoneDnaK	Lysinibacillus	2432.85	K.ALEAGELEGIK.A	ALEAGELEGIK	molecularchaperoneDnaK	TRUE	1.25948		WP_012295327.1	MULTISPECIES:	molecularchaperoneDnaK	Lysinibacillus	5496.96	R.TVGPVR.Q	TVGPVR	molecularchaperoneDnaK
	WP_036162238.1	MULTISPECIES:	HollidayjunctionbranchmigrationDNAhelicaseRuvB	Lysinibacillus	4378.73	R.LAQYIGQHKVK.E	LAQYIGQHKVK	HollidayjunctionbranchmigrationDNAhelicaseRuvB	TRUE	1.25888		WP_036162238.1	MULTISPECIES:	HollidayjunctionbranchmigrationDNAhelicaseRuvB	Lysinibacillus	9891.03	R.VRDYAQVLGDGM(oxidationofM)ITEGIAK.Q	VRDYAQVLGDGMITEGIAK	HollidayjunctionbranchmigrationDNAhelicaseRuvB
	WP_206701033.1	MULTISPECIES:	PucRfamilytranscriptionalregulator	Lysinibacillus	3151.42	R.SVEITLK.M	SVEITLK	PucRfamilytranscriptionalregulator	TRUE	1.24897		WP_206701033.1	MULTISPECIES:	PucRfamilytranscriptionalregulator	Lysinibacillus	7087.44	R.SM(oxidationofM)KRAIAVSK.Q	SMKRAIAVSK	PucRfamilytranscriptionalregulator
	WP_036122138.1	MULTISPECIES:	YbaB/EbfCfamilynucleoid-associatedprotein	Lysinibacillus	1648.57	K.KVEEKTNSTMGK.F	KVEEKTNSTMGK	YbaB/EbfCfamilynucleoid-associatedprotein	TRUE	1.23139		WP_126660401.1	MULTISPECIES:	YbaB/EbfCfamilynucleoid-associatedprotein	Lysinibacillus	3678.6	M.RGM(oxidationofM)GNMQGMM(oxidationofM)KK.M	RGMGNMQGMMKK	YbaB/EbfCfamilynucleoid-associatedprotein
	WP_036160363.1	MULTISPECIES:	FAD-bindingoxidoreductase	Lysinibacillus	2407.27	K.MIARRAVR.F	MIARRAVR	FAD-bindingoxidoreductase	TRUE	1.21276		WP_012295584.1	MULTISPECIES:	FAD-bindingoxidoreductase	Lysinibacillus	5326.7	K.NIEWVENIR.R	NIEWVENIR	FAD-bindingoxidoreductase
	WP_012296222.1	MULTISPECIES:	tRNAuridine-5-carboxymethylaminomethyl(34)synthesisenzymeMnmG	Lysinibacillus	2421.33	R.YC[carbamidomethylationofC]PSIEDK.V	YCPSIEDK	tRNAuridine-5-carboxymethylaminomethyl(34)synthesisenzymeMnmG	TRUE	1.18428		WP_012296222.1	MULTISPECIES:	tRNAuridine-5-carboxymethylaminomethyl(34)synthesisenzymeMnmG	Lysinibacillus	5288.85	R.EIDALGGVMGK.V	EIDALGGVMGK	tRNAuridine-5-carboxymethylaminomethyl(34)synthesisenzymeMnmG
	WP_012293906.1	MULTISPECIES:	mannonateoxidoreductase	Lysinibacillus	1640.06	R.HHIETTEEK.I	HHIETTEEK	mannonateoxidoreductase	TRUE	1.11857		WP_012293906.1	MULTISPECIES:	mannonateoxidoreductase	Lysinibacillus	3474.57	K.M(oxidationofM)NVRAEVLQR.A	MNVRAEVLQR	mannonateoxidoreductase
	WP_012296206.1	MULTISPECIES:	adenylosuccinatesynthase	Lysinibacillus	1713.35	K.GLQERGINTDNLRISNR.A	GLQERGINTDNLRISNR	adenylosuccinatesynthase	TRUE	1.11629		WP_012296206.1	MULTISPECIES:	adenylosuccinatesynthase	Lysinibacillus	3625.94	K.IDGETYK.L	IDGETYK	adenylosuccinatesynthase
	WP_012295418.1	MULTISPECIES:	aspartate--tRNAligase	Lysinibacillus	2776.83	K.VFADTVAQGK.Q	VFADTVAQGK	aspartate--tRNAligase	TRUE	1.11362		WP_012295418.1	MULTISPECIES:	aspartate--tRNAligase	Lysinibacillus	5869.18	R.TDVSEDLRLKYR.Y	TDVSEDLRLKYR	aspartate--tRNAligase
	WP_053596370.1	MULTISPECIES:	FkbMfamilymethyltransferase	Lysinibacillus	4010.58	K.NLLADEQSR.K	NLLADEQSR	FkbMfamilymethyltransferase	TRUE	1.10053		WP_053596370.1	MULTISPECIES:	FkbMfamilymethyltransferase	Lysinibacillus	8424.33	K.NLLADEQSR.K	NLLADEQSR	FkbMfamilymethyltransferase
	WP_112117412.1	MULTISPECIES:	oligoendopeptidaseF	Lysinibacillus	8291.12	-.M(oxidationofM)ASNSNQVLVRK.E	MASNSNQVLVRK	oligoendopeptidaseF	TRUE	1.09257		WP_012293845.1	MULTISPECIES:	oligoendopeptidaseF	Lysinibacillus	17349.8	R.FKRWVISNIVSK.T	FKRWVISNIVSK	oligoendopeptidaseF
	WP_206701061.1	MULTISPECIES:	DNApolymeraseIIIsubunitgamma/tau	Lysinibacillus	2642.3	R.LSTNDIIER.M	LSTNDIIER	DNApolymeraseIIIsubunitgamma/tau	TRUE	1.0844		WP_206701061.1	MULTISPECIES:	DNApolymeraseIIIsubunitgamma/tau	Lysinibacillus	5507.59	R.AKNPNGYK.A	AKNPNGYK	DNApolymeraseIIIsubunitgamma/tau
	WP_012295569.1	MULTISPECIES:	electrontransferflavoproteinsubunitbeta/FixAfamilyprotein	Lysinibacillus	2817.48	K.VTVVTIGGEDAEKQLR.T	VTVVTIGGEDAEKQLR	electrontransferflavoproteinsubunitbeta/FixAfamilyprotein	TRUE	1.07886		WP_012295569.1	MULTISPECIES:	electrontransferflavoproteinsubunitbeta/FixAfamilyprotein	Lysinibacillus	5857.15	R.YPSLPGIM(oxidationofM)KAKK.K	YPSLPGIMKAKK	electrontransferflavoproteinsubunitbeta/FixAfamilyprotein
	WP_010857552.1	MULTISPECIES:	metal-sensitivetranscriptionalregulator	Lysinibacillus	2670.76	-.M(oxidationofM)EYSDQVKNR.V	MEYSDQVKNR	metal-sensitivetranscriptionalregulator	TRUE	1.04255		WP_012295889.1	MULTISPECIES:	metal-sensitivetranscriptionalregulator	Lysinibacillus	5455.15	K.DVITQLSAVR.S	DVITQLSAVR	metal-sensitivetranscriptionalregulator
	WP_099805090.1	MULTISPECIES:	malonatedecarboxylasesubunitepsilon	Lysinibacillus	2389.27	R.LFIEM(oxidationofM)PPGDILTK.L	LFIEMPPGDILTK	malonatedecarboxylasesubunitepsilon	TRUE	1.03953		WP_099805090.1	MULTISPECIES:	malonatedecarboxylasesubunitepsilon	Lysinibacillus	4872.98	K.IPIASNVNARLLK.T	IPIASNVNARLLK	malonatedecarboxylasesubunitepsilon
	WP_217581450.1	MULTISPECIES:	SagB/ThcOxfamilydehydrogenase	Lysinibacillus	2184.15	-.M(oxidationofM)NVWNFK.G	MNVWNFK	SagB/ThcOxfamilydehydrogenase	TRUE	1.02773		WP_217581450.1	MULTISPECIES:	SagB/ThcOxfamilydehydrogenase	Lysinibacillus	4428.88	K.ANVKVDKK.V	ANVKVDKK	SagB/ThcOxfamilydehydrogenase
	WP_012291831.1	MULTISPECIES:	DNAreplication/repairproteinRecF	Lysinibacillus	8618.49	K.ETLIIKYR.T	ETLIIKYR	DNAreplication/repairproteinRecF	TRUE	1.00962		WP_012291831.1	MULTISPECIES:	DNAreplication/repairproteinRecF	Lysinibacillus	17319.9	K.ETLIIKYR.T	ETLIIKYR	DNAreplication/repairproteinRecF
	WP_012293096.1	MULTISPECIES:	dihydrolipoyldehydrogenase	Lysinibacillus	1974.93	R.ALALNQSEGFVK.L	ALALNQSEGFVK	dihydrolipoyldehydrogenase	TRUE	1.00374		WP_012293096.1	MULTISPECIES:	dihydrolipoyldehydrogenase	Lysinibacillus	3957.25	R.ALALNQSEGFVK.L	ALALNQSEGFVK	dihydrolipoyldehydrogenase
	WP_012293254.1	MULTISPECIES:	FADH(2)-oxidizingmethylenetetrahydrofolate--tRNA-(uracil(54)-C(5))-methyltransferaseTrmFO	Lysinibacillus	3122.48	R.RSKPER.A	RSKPER	FADH(2)-oxidizingmethylenetetrahydrofolate--tRNA-(uracil(54)-C(5))-methyltransferaseTrmFO	TRUE	1.00368		WP_012293254.1	MULTISPECIES:	FADH(2)-oxidizingmethylenetetrahydrofolate--tRNA-(uracil(54)-C(5))-methyltransferaseTrmFO	Lysinibacillus	6256.46	K.TGKRPYAVVQLR.Q	TGKRPYAVVQLR	FADH(2)-oxidizingmethylenetetrahydrofolate--tRNA-(uracil(54)-C(5))-methyltransferaseTrmFO
	WP_012292409.1	MULTISPECIES:	DUF5808domain-containingprotein	Lysinibacillus	3679.41	K.ISVLKR.Q	ISVLKR	DUF5808domain-containingprotein	TRUE	1.0006		WP_012292409.1	MULTISPECIES:	DUF5808domain-containingprotein	Lysinibacillus	7361.01	K.QVRAVDLTARSR.D	QVRAVDLTARSR	DUF5808domain-containingprotein
	WP_012295678.1	MULTISPECIES:	iron-containingalcoholdehydrogenase	Lysinibacillus	2464.67	R.DAAEKAISAIEK.L	DAAEKAISAIEK	iron-containingalcoholdehydrogenase	TRUE	0.982681		WP_012295678.1	MULTISPECIES:	iron-containingalcoholdehydrogenase	Lysinibacillus	4886.65	K.GIGLIASNGGR.I	GIGLIASNGGR	iron-containingalcoholdehydrogenase
	WP_082011579.1	MULTISPECIES:	reversetranscriptasedomain-containingprotein	Lysinibacillus	3267.41	K.KAHILMK.E	KAHILMK	reversetranscriptasedomain-containingprotein	TRUE	0.965413		WP_082011579.1	MULTISPECIES:	reversetranscriptasedomain-containingprotein	Lysinibacillus	6421.81	R.LLQIM(oxidationofM)EPAEFRQFKQGK.V	LLQIMEPAEFRQFKQGK	reversetranscriptasedomain-containingprotein
	WP_036162346.1	MULTISPECIES:	AroMfamilyprotein	Lysinibacillus	2249.01	K.NLLLPDR.M	NLLLPDR	AroMfamilyprotein	TRUE	0.964572		WP_036162346.1	MULTISPECIES:	AroMfamilyprotein	Lysinibacillus	4418.34	K.NLLLPDR.M	NLLLPDR	AroMfamilyprotein
	WP_031416837.1	MULTISPECIES:	SPASMdomain-containingprotein	Lysinibacillus	2666.29	R.IEEKVEPGK.G	IEEKVEPGK	SPASMdomain-containingprotein	TRUE	0.959047		WP_031416837.1	MULTISPECIES:	SPASMdomain-containingprotein	Lysinibacillus	5223.38	K.VNITTNGTLIKK.N	VNITTNGTLIKK	SPASMdomain-containingprotein
	WP_012292989.1	MULTISPECIES:	classIIfructose-bisphosphatealdolase	Lysinibacillus	1789.1	K.YFLPAR.E	YFLPAR	classIIfructose-bisphosphatealdolase	TRUE	0.956119		WP_012292989.1	MULTISPECIES:	classIIfructose-bisphosphatealdolase	Lysinibacillus	3499.7	K.AVIAGAEK.V	AVIAGAEK	classIIfructose-bisphosphatealdolase
	WP_068983165.1	MULTISPECIES:	typeIDNAtopoisomerase	Lysinibacillus	1782.18	K.C[carbamidomethylationofC]PSC[carbamidomethylationofC]ETGEIVER.K	CPSCETGEIVER	typeIDNAtopoisomerase	TRUE	0.933343		WP_016994084.1	MULTISPECIES:	typeIDNAtopoisomerase	Lysinibacillus	3445.57	K.VVEEFYK.D	VVEEFYK	typeIDNAtopoisomerase
	WP_036162515.1	MULTISPECIES:	23SrRNA(uracil(1939)-C(5))-methyltransferaseRlmD	Lysinibacillus	5364.09	R.KNARNHGFK.H	KNARNHGFK	23SrRNA(uracil(1939)-C(5))-methyltransferaseRlmD	TRUE	0.917202		WP_036162515.1	MULTISPECIES:	23SrRNA(uracil(1939)-C(5))-methyltransferaseRlmD	Lysinibacillus	10284.1	K.GAIPGEEITAQVTKTQR.N	GAIPGEEITAQVTKTQR	23SrRNA(uracil(1939)-C(5))-methyltransferaseRlmD
	WP_012295396.1	MULTISPECIES:	magnesium/cobalttransporterCorA	Lysinibacillus	3994.82	R.QAIMPQRR.I	QAIMPQRR	magnesium/cobalttransporterCorA	TRUE	0.901198		WP_012295396.1	MULTISPECIES:	magnesium/cobalttransporterCorA	Lysinibacillus	7594.95	-.MIKIHYFNHNSK.T	MIKIHYFNHNSK	magnesium/cobalttransporterCorA
	WP_012291837.1	MULTISPECIES:	IMPdehydrogenase	Lysinibacillus	3195.92	R.ALFEAGADVVK.V	ALFEAGADVVK	IMPdehydrogenase	TRUE	0.872963		WP_012291837.1	MULTISPECIES:	IMPdehydrogenase	Lysinibacillus	5985.84	K.EDLITAPVGTTLEDAEK.I	EDLITAPVGTTLEDAEK	IMPdehydrogenase
	WP_031419468.1	MULTISPECIES:	recombinationmediatorRecR	Lysinibacillus	2964.02	K.TAARLAFFVLSM(oxidationofM)K.E	TAARLAFFVLSMK	recombinationmediatorRecR	TRUE	0.849632		WP_031419468.1	MULTISPECIES:	recombinationmediatorRecR	Lysinibacillus	5482.34	K.LPGIGPK.T	LPGIGPK	recombinationmediatorRecR
	WP_075807269.1		3,4-dihydroxy-2-butanone-4-phosphatesynthase	Lysinibacillusagricola	2661.99	K.M(oxidationofM)IVVVDDEDR.E	MIVVVDDEDR	3,4-dihydroxy-2-butanone-4-phosphatesynthase	TRUE	0.829207		WP_150907890.1	MULTISPECIES:	3,4-dihydroxy-2-butanone-4-phosphatesynthase	Lysinibacillus	4869.33	K.M(oxidationofM)LGSQAKKTDFR.R	MLGSQAKKTDFR	3,4-dihydroxy-2-butanone-4-phosphatesynthase
	WP_012295212.1	MULTISPECIES:	transcriptionalrepressor	Lysinibacillus	2740.11	K.DFPGMSFDTIYR.N	DFPGMSFDTIYR	transcriptionalrepressor	TRUE	0.772341		WP_012295212.1	MULTISPECIES:	transcriptionalrepressor	Lysinibacillus	4856.41	K.KDFPGMSFDTIYR.N	KDFPGMSFDTIYR	transcriptionalrepressor
	WP_012296093.1	MULTISPECIES:	DNArepairproteinRadA	Lysinibacillus	3566.94	K.RM(oxidationofM)ATGVDQNR.V	RMATGVDQNR	DNArepairproteinRadA	TRUE	0.763368		WP_012296093.1	MULTISPECIES:	DNArepairproteinRadA	Lysinibacillus	6289.83	K.RMATGVDQNR.V	RMATGVDQNR	DNArepairproteinRadA
	WP_012291839.1	MULTISPECIES:	asparaginesynthase(glutamine-hydrolyzing)	Lysinibacillus	1752.42	K.ASEKVLQAM(oxidationofM)TR.T	ASEKVLQAMTR	asparaginesynthase(glutamine-hydrolyzing)	TRUE	0.756079		WP_012295715.1	MULTISPECIES:	asparaginesynthase(glutamine-hydrolyzing)	Lysinibacillus	3077.38	R.VNDIDTK.Y	VNDIDTK	asparaginesynthase(glutamine-hydrolyzing)
	WP_217581244.1	MULTISPECIES:	GNATfamilyN-acetyltransferase	Lysinibacillus	3307.07	M.KSGFEFK.D	KSGFEFK	GNATfamilyN-acetyltransferase	TRUE	0.753686		WP_217581244.1	MULTISPECIES:	GNATfamilyN-acetyltransferase	Lysinibacillus	5799.55	K.SEYIELNEEPR.L	SEYIELNEEPR	GNATfamilyN-acetyltransferase
	WP_012292178.1	MULTISPECIES:	3'-5'exoribonucleaseYhaM	Lysinibacillus	4513.56	R.VGGEIHDYRGKNQLR.I	VGGEIHDYRGKNQLR	3'-5'exoribonucleaseYhaM	TRUE	0.74214		WP_012292178.1	MULTISPECIES:	3'-5'exoribonucleaseYhaM	Lysinibacillus	7863.25	K.MYHAEAIVR.V	MYHAEAIVR	3'-5'exoribonucleaseYhaM
	WP_036160485.1	MULTISPECIES:	AAAfamilyATPase	Lysinibacillus	1904.58	R.VLEQEQASLQMDIDR.C	VLEQEQASLQMDIDR	AAAfamilyATPase	TRUE	0.740733		WP_036160485.1	MULTISPECIES:	AAAfamilyATPase	Lysinibacillus	3315.37	K.EANELFK.K	EANELFK	AAAfamilyATPase
	WP_012295754.1	MULTISPECIES:	amidohydrolase	Lysinibacillus	4858.64	K.TAGPTLASR.V	TAGPTLASR	amidohydrolase	TRUE	0.740222		WP_012295754.1	MULTISPECIES:	amidohydrolase	Lysinibacillus	8455.11	K.TAGPTLASR.V	TAGPTLASR	amidohydrolase
	WP_010860160.1	MULTISPECIES:	50SribosomalproteinL20	Lysinibacillus	4811.31	K.VAGIEVNR.K	VAGIEVNR	50SribosomalproteinL20	TRUE	0.732087		WP_010860160.1	MULTISPECIES:	50SribosomalproteinL20	Lysinibacillus	8333.61	K.VAGIEVNR.K	VAGIEVNR	50SribosomalproteinL20
	WP_012295713.1	MULTISPECIES:	rRNApseudouridinesynthase	Lysinibacillus	3933.63	K.KHVPK.V	KHVPK	rRNApseudouridinesynthase	TRUE	0.699645		WP_012293418.1	MULTISPECIES:	rRNApseudouridinesynthase	Lysinibacillus	6685.77	K.VNGIVVRELGTK.V	VNGIVVRELGTK	rRNApseudouridinesynthase
	WP_025115837.1	MULTISPECIES:	DUF402domain-containingprotein	Lysinibacillus	22465	K.FQLDM(oxidationofM)QSDDC[carbamidomethylationofC].-	FQLDMQSDDC	DUF402domain-containingprotein	TRUE	0.682948		WP_025115837.1	MULTISPECIES:	DUF402domain-containingprotein	Lysinibacillus	37807.4	K.FQLDM(oxidationofM)QSDDC[carbamidomethylationofC].-	FQLDMQSDDC	DUF402domain-containingprotein
	WP_012295943.1	MULTISPECIES:	PLP-dependentaminotransferasefamilyprotein	Lysinibacillus	1336.69	K.LNVSNVEESK.I	LNVSNVEESK	PLP-dependentaminotransferasefamilyprotein	TRUE	0.639871		WP_012291840.1	MULTISPECIES:	PLP-dependentaminotransferasefamilyprotein	Lysinibacillus	2192	K.HDQLTSILEK.Y	HDQLTSILEK	PLP-dependentaminotransferasefamilyprotein
	WP_031418055.1	MULTISPECIES:	DUF5050domain-containingprotein	Lysinibacillus	6049.71	K.ISNKSM(oxidationofM)SDVEK.V	ISNKSMSDVEK	DUF5050domain-containingprotein	TRUE	0.620614		WP_036160584.1	MULTISPECIES:	DUF5050domain-containingprotein	Lysinibacillus	9804.24	-.MKKWLLC[carbamidomethylationofC]GATLLM(oxidationofM)LSPNAAYAQQR.E	MKKWLLCGATLLMLSPNAAYAQQR	DUF5050domain-containingprotein
	WP_012296105.1	MULTISPECIES:	DUF4003familyprotein	Lysinibacillus	3797.09	R.DALKKQDVK.V	DALKKQDVK	DUF4003familyprotein	TRUE	0.614152		WP_012296105.1	MULTISPECIES:	DUF4003familyprotein	Lysinibacillus	6129.09	R.DALKKQDVK.V	DALKKQDVK	DUF4003familyprotein
	WP_031417906.1	MULTISPECIES:	YdcFfamilyprotein	Lysinibacillus	2340.16	K.AIDFYHK.Q	AIDFYHK	YdcFfamilyprotein	TRUE	0.611399		WP_230591252.1	MULTISPECIES:	YdcFfamilyprotein	Lysinibacillus	3770.93	K.LDAEGVGSK.T	LDAEGVGSK	YdcFfamilyprotein
	WP_031419855.1	MULTISPECIES:	dipeptide/oligopeptide/nickelABCtransporterATP-bindingprotein	Lysinibacillus	2769.66	K.ELLREPLM(oxidationofM)AAHKSLTDR.E	ELLREPLMAAHKSLTDR	dipeptide/oligopeptide/nickelABCtransporterATP-bindingprotein	TRUE	0.599274		WP_031419855.1	MULTISPECIES:	dipeptide/oligopeptide/nickelABCtransporterATP-bindingprotein	Lysinibacillus	4429.44	K.ELLREPLM(oxidationofM)AAHKSLTDR.E	ELLREPLMAAHKSLTDR	dipeptide/oligopeptide/nickelABCtransporterATP-bindingprotein
	WP_012293630.1	MULTISPECIES:	terminasefamilyprotein	Lysinibacillus	2646.66	K.QM(oxidationofM)NDAVPR.D	QMNDAVPR	terminasefamilyprotein	TRUE	0.589934		WP_012293630.1	MULTISPECIES:	terminasefamilyprotein	Lysinibacillus	4208.01	R.GYLNMYKM(oxidationofM)K.T	GYLNMYKMK	terminasefamilyprotein
	WP_012292187.1	MULTISPECIES:	HITfamilyprotein	Lysinibacillus	1814.35	K.YSPEQLADVAENIK.A	YSPEQLADVAENIK	HITfamilyprotein	TRUE	0.586576		WP_012292187.1	MULTISPECIES:	HITfamilyprotein	Lysinibacillus	2878.61	K.YSPEQLADVAENIK.A	YSPEQLADVAENIK	HITfamilyprotein
	WP_036161284.1	MULTISPECIES:	toxicanionresistanceprotein	Lysinibacillus	4997.08	K.QGLIHAVTLK.R	QGLIHAVTLK	toxicanionresistanceprotein	TRUE	0.576777		WP_036161284.1	MULTISPECIES:	toxicanionresistanceprotein	Lysinibacillus	7879.28	K.KGGFISKLFNK.G	KGGFISKLFNK	toxicanionresistanceprotein
	WP_012292180.1	MULTISPECIES:	peptidylprolylisomerase	Lysinibacillus	3146.34	K.VGDISVADFNEK.A	VGDISVADFNEK	peptidylprolylisomerase	TRUE	0.559824		WP_012296168.1	MULTISPECIES:	peptidylprolylisomerase	Lysinibacillus	4907.73	K.GIYVVLSLLAIM(oxidationofM)FVLTGC[carbamidomethylationofC]GTAK.D	GIYVVLSLLAIMFVLTGCGTAK	peptidylprolylisomerase
	WP_012293016.1	MULTISPECIES:	effluxRNDtransporterpermeasesubunit	Lysinibacillus	4524.28	K.EGPVSIRR.S	EGPVSIRR	effluxRNDtransporterpermeasesubunit	TRUE	0.556971		WP_012293016.1	MULTISPECIES:	effluxRNDtransporterpermeasesubunit	Lysinibacillus	7044.17	K.RAEQPSVTTTR.A	RAEQPSVTTTR	effluxRNDtransporterpermeasesubunit
	WP_031418516.1	MULTISPECIES:	3-hydroxyacyl-ACPdehydrataseFabZ	Lysinibacillus	2857.22	R.QVVPGDQLK.L	QVVPGDQLK	3-hydroxyacyl-ACPdehydrataseFabZ	TRUE	0.52797		WP_031418516.1	MULTISPECIES:	3-hydroxyacyl-ACPdehydrataseFabZ	Lysinibacillus	4365.75	R.QVVPGDQLK.L	QVVPGDQLK	3-hydroxyacyl-ACPdehydrataseFabZ
	WP_012293689.1	MULTISPECIES:	sporegerminationprotein	Lysinibacillus	4559.3	K.SGISR.A	SGISR	sporegerminationprotein	TRUE	0.508198		WP_051563234.1	MULTISPECIES:	sporegerminationprotein	Lysinibacillus	6876.33	R.GPIWSMKARPKDLNTQNR.W	GPIWSMKARPKDLNTQNR	sporegerminationprotein
	WP_012295469.1	MULTISPECIES:	rodshape-determiningprotein	Lysinibacillus	4355.89	R.KTYNLTIGER.T	KTYNLTIGER	rodshape-determiningprotein	TRUE	0.507858		WP_012295469.1	MULTISPECIES:	rodshape-determiningprotein	Lysinibacillus	6568.07	R.TPGSIVAIRPM(oxidationofM)K.D	TPGSIVAIRPMK	rodshape-determiningprotein
	WP_012295696.1	MULTISPECIES:	UDP-N-acetylmuramate--L-alanineligase	Lysinibacillus	2811.68	K.YFFTEQPLR.E	YFFTEQPLR	UDP-N-acetylmuramate--L-alanineligase	TRUE	0.494434		WP_012295696.1	MULTISPECIES:	UDP-N-acetylmuramate--L-alanineligase	Lysinibacillus	4201.87	R.NVEKTTEGTK.F	NVEKTTEGTK	UDP-N-acetylmuramate--L-alanineligase
	WP_036161424.1	MULTISPECIES:	DnaDdomainprotein	Lysinibacillus	2560.09	K.KVTDMPAK.R	KVTDMPAK	DnaDdomainprotein	TRUE	0.488902		WP_038509878.1	MULTISPECIES:	DnaDdomainprotein	Lysinibacillus	3811.72	R.QKILEMLGK.S	QKILEMLGK	DnaDdomainprotein
	WP_012292768.1	MULTISPECIES:	F0F1ATPsynthasesubunitbeta	Lysinibacillus	4089.33	K.AISVPVGEVTLGR.V	AISVPVGEVTLGR	F0F1ATPsynthasesubunitbeta	TRUE	0.481026		WP_012292768.1	MULTISPECIES:	F0F1ATPsynthasesubunitbeta	Lysinibacillus	6056.41	K.AISVPVGEVTLGR.V	AISVPVGEVTLGR	F0F1ATPsynthasesubunitbeta
	WP_036225924.1	MULTISPECIES:	preproteintranslocasesubunitSecA	Lysinibacillus	2058.03	K.WIDHIDAMDQLR.Q	WIDHIDAMDQLR	preproteintranslocasesubunitSecA	TRUE	0.454294		WP_036225924.1	MULTISPECIES:	preproteintranslocasesubunitSecA	Lysinibacillus	2992.98	K.GAVTIATNM(oxidationofM)AGR.G	GAVTIATNMAGR	preproteintranslocasesubunitSecA
	WP_012295274.1	MULTISPECIES:	DNA(cytosine-5-)-methyltransferase	Lysinibacillus	6746.56	R.GTSTR.E	GTSTR	DNA(cytosine-5-)-methyltransferase	TRUE	0.443813		WP_012295274.1	MULTISPECIES:	DNA(cytosine-5-)-methyltransferase	Lysinibacillus	9740.77	K.GLSPTLTQPPVPK.I	GLSPTLTQPPVPK	DNA(cytosine-5-)-methyltransferase
	WP_012295643.1	MULTISPECIES:	tRNA4-thiouridine(8)synthaseThiI	Lysinibacillus	5224.99	K.VEHYESFSDFDELIAR.A	VEHYESFSDFDELIAR	tRNA4-thiouridine(8)synthaseThiI	TRUE	0.442508		WP_012295643.1	MULTISPECIES:	tRNA4-thiouridine(8)synthaseThiI	Lysinibacillus	7537.1	K.VEHYESFSDFDELIAR.A	VEHYESFSDFDELIAR	tRNA4-thiouridine(8)synthaseThiI
	WP_036161991.1	MULTISPECIES:	MFStransporter	Lysinibacillus	1820.17	-.M(oxidationofM)ITSFSKPTNR.G	MITSFSKPTNR	MFStransporter	TRUE	0.437816		WP_036161791.1	MULTISPECIES:	MFStransporter	Lysinibacillus	2617.08	K.HLTVSQASVVMGC[carbamidomethylationofC]GLLAR.A	HLTVSQASVVMGCGLLAR	MFStransporter
	WP_031418807.1	MULTISPECIES:	UDP-N-acetylmuramoyl-L-alanyl-D-glutamate--2,6-diaminopimelateligase	Lysinibacillus	1823.67	K.DITMIGVTGTNGK.T	DITMIGVTGTNGK	UDP-N-acetylmuramoyl-L-alanyl-D-glutamate--2,6-diaminopimelateligase	TRUE	0.387102		WP_031418899.1	MULTISPECIES:	UDP-N-acetylmuramoyl-L-alanyl-D-glutamate--2,6-diaminopimelateligase	Lysinibacillus	2529.62	K.NQKFPFSDQQC[carbamidomethylationofC]IK.D	NQKFPFSDQQCIK	UDP-N-acetylmuramoyl-L-alanyl-D-glutamate--2,6-diaminopimelateligase
	WP_012294163.1	MULTISPECIES:	oleatehydratase	Lysinibacillus	2968.71	K.LFFTPEEK.L	LFFTPEEK	oleatehydratase	TRUE	0.381708		WP_012294163.1	MULTISPECIES:	oleatehydratase	Lysinibacillus	4101.89	K.LFFTPEEK.L	LFFTPEEK	oleatehydratase
	WP_068985713.1	MULTISPECIES:	proteinargininekinase	Lysinibacillus	2083	K.LM(oxidationofM)EKAELALEDR.V	LMEKAELALEDR	proteinargininekinase	TRUE	0.368448		WP_068985713.1	MULTISPECIES:	proteinargininekinase	Lysinibacillus	2850.47	K.LQENYSYFAIK.D	LQENYSYFAIK	proteinargininekinase
	WP_031416357.1	MULTISPECIES:	bifunctionalhomocysteineS-methyltransferase/methylenetetrahydrofolatereductase	Lysinibacillus	6818.21	R.SVIVELDTPR.H	SVIVELDTPR	bifunctionalhomocysteineS-methyltransferase/methylenetetrahydrofolatereductase	TRUE	0.363746		WP_031416357.1	MULTISPECIES:	bifunctionalhomocysteineS-methyltransferase/methylenetetrahydrofolatereductase	Lysinibacillus	9298.3	R.SVIVELDTPR.H	SVIVELDTPR	bifunctionalhomocysteineS-methyltransferase/methylenetetrahydrofolatereductase
	WP_012295255.1	MULTISPECIES:	sporulationproteinYqfD	Lysinibacillus	4609.97	K.RVVFR.E	RVVFR	sporulationproteinYqfD	TRUE	0.357195		WP_012295255.1	MULTISPECIES:	sporulationproteinYqfD	Lysinibacillus	6256.62	R.VLVKGIHQEK.V	VLVKGIHQEK	sporulationproteinYqfD
	WP_036196570.1	MULTISPECIES:	helix-turn-helixdomain-containingprotein	Lysinibacillus	1590.16	K.VHLM(oxidationofM)LSLTYTTP.-	VHLMLSLTYTTP	helix-turn-helixdomain-containingprotein	TRUE	0.348045		WP_241744848.1	MULTISPECIES:	helix-turn-helixdomain-containingprotein	Lysinibacillus	2143.6	K.KGQEM(oxidationofM)QQKEK.T	KGQEMQQKEK	helix-turn-helixdomain-containingprotein
	WP_012292785.1	MULTISPECIES:	flagellin	Lysinibacillus	3739.18	R.HYGAMSKAMLRISTGYR.I	HYGAMSKAMLRISTGYR	flagellin	TRUE	0.340164		WP_107921590.1	MULTISPECIES:	flagellin	Lysinibacillus	5011.12	K.NTEFNTQK.L	NTEFNTQK	flagellin
	WP_031417817.1	MULTISPECIES:	responseregulatortranscriptionfactor	Lysinibacillus	2757.49	R.TVDTHIK.T	TVDTHIK	responseregulatortranscriptionfactor	TRUE	0.340035		WP_036161073.1	MULTISPECIES:	responseregulatortranscriptionfactor	Lysinibacillus	3695.14	R.WIPYNLAISNLYVM(oxidationofM)NYNQK.Q	WIPYNLAISNLYVMNYNQK	responseregulatortranscriptionfactor
	WP_012292644.1	MULTISPECIES:	LuxRC-terminal-relatedtranscriptionalregulator	Lysinibacillus	4881.77	R.LGLLS.-	LGLLS	LuxRC-terminal-relatedtranscriptionalregulator	TRUE	0.325065		WP_012292644.1	MULTISPECIES:	LuxRC-terminal-relatedtranscriptionalregulator	Lysinibacillus	6468.67	R.TQVVASAFR.L	TQVVASAFR	LuxRC-terminal-relatedtranscriptionalregulator
	WP_012294672.1	MULTISPECIES:	DNAligaseD	Lysinibacillus	4058.74	K.VIQIVQAK.E	VIQIVQAK	DNAligaseD	TRUE	0.32393		WP_053592564.1	MULTISPECIES:	DNAligaseD	Lysinibacillus	5373.48	R.FLC[carbamidomethylationofC]EQKPGLYTIER.L	FLCEQKPGLYTIER	DNAligaseD
	WP_068983754.1	MULTISPECIES:	tRNApreQ1(34)S-adenosylmethionineribosyltransferase-isomeraseQueA	Lysinibacillus	3270.84	K.QM(oxidationofM)AGTDEWETLVKPAKR.V	QMAGTDEWETLVKPAKR	tRNApreQ1(34)S-adenosylmethionineribosyltransferase-isomeraseQueA	TRUE	0.321134		WP_054550032.1	MULTISPECIES:	tRNApreQ1(34)S-adenosylmethionineribosyltransferase-isomeraseQueA	Lysinibacillus	4321.22	R.LMVVTPGSNK.V	LMVVTPGSNK	tRNApreQ1(34)S-adenosylmethionineribosyltransferase-isomeraseQueA
	WP_197150523.1	MULTISPECIES:	penicillin-bindingprotein1A	Lysinibacillus	2464.51	K.NSFLQNEK.K	NSFLQNEK	penicillin-bindingprotein1A	TRUE	0.313375		WP_179965997.1	MULTISPECIES:	penicillin-bindingprotein1A	Lysinibacillus	3236.83	K.WSTGQTIVDERM(oxidationofM)TYTKSDK.V	WSTGQTIVDERMTYTKSDK	penicillin-bindingprotein1A
	WP_012292035.1	MULTISPECIES:	tRNA-dihydrouridinesynthase	Lysinibacillus	2462.64	R.QTGLELAEK.Y	QTGLELAEK	tRNA-dihydrouridinesynthase	TRUE	0.313257		WP_012292035.1	MULTISPECIES:	tRNA-dihydrouridinesynthase	Lysinibacillus	3234.08	K.EHSSK.E	EHSSK	tRNA-dihydrouridinesynthase
	WP_031419663.1	MULTISPECIES:	pentapeptiderepeat-containingprotein	Lysinibacillus	3952.9	R.M(oxidationofM)PVNALLLK.T	MPVNALLLK	pentapeptiderepeat-containingprotein	TRUE	0.302285		WP_031419663.1	MULTISPECIES:	pentapeptiderepeat-containingprotein	Lysinibacillus	5147.8	R.TIRDTSFGM(oxidationofM)TIR.E	TIRDTSFGMTIR	pentapeptiderepeat-containingprotein
	WP_206700916.1	MULTISPECIES:	ribosomebiogenesisGTPaseYlqF	Lysinibacillus	3140.95	K.EKFDR.M	EKFDR	ribosomebiogenesisGTPaseYlqF	TRUE	0.293349		WP_229388753.1	MULTISPECIES:	ribosomebiogenesisGTPaseYlqF	Lysinibacillus	4062.35	K.EKFDR.M	EKFDR	ribosomebiogenesisGTPaseYlqF
	WP_052323565.1	MULTISPECIES:	stalkdomain-containingprotein	Lysinibacillus	4054.64	K.LNVGEDTK.I	LNVGEDTK	stalkdomain-containingprotein	TRUE	0.28949		WP_052323565.1	MULTISPECIES:	stalkdomain-containingprotein	Lysinibacillus	5228.42	K.LNVGEDTKIESVSGKELK.A	LNVGEDTKIESVSGKELK	stalkdomain-containingprotein
	WP_089986115.1	MULTISPECIES:	tyrosine--tRNAligase	Lysinibacillus	3521.48	R.IGDPTGKSKGR.V	IGDPTGKSKGR	tyrosine--tRNAligase	TRUE	0.264143		WP_058844131.1	MULTISPECIES:	tyrosine--tRNAligase	Lysinibacillus	4451.66	K.AKGRVALSDDM(oxidationofM)VK.Q	AKGRVALSDDMVK	tyrosine--tRNAligase
	WP_008181723.1	MULTISPECIES:	30SribosomalproteinS17	Lysinibacillus	4338.01	R.LVEVVEK.A	LVEVVEK	30SribosomalproteinS17	TRUE	0.227922		WP_008181723.1	MULTISPECIES:	30SribosomalproteinS17	Lysinibacillus	5326.74	K.IGDIVR.I	IGDIVR	30SribosomalproteinS17
	WP_051147711.1	MULTISPECIES:	MarRfamilytranscriptionalregulator	Lysinibacillus	3825.7	K.AANQFTKLYR.Q	AANQFTKLYR	MarRfamilytranscriptionalregulator	TRUE	0.220016		WP_012294204.1	MULTISPECIES:	MarRfamilytranscriptionalregulator	Lysinibacillus	4667.41	K.QLSSIHEQLHEKAR.N	QLSSIHEQLHEKAR	MarRfamilytranscriptionalregulator
	WP_068983781.1	MULTISPECIES:	glutamate-1-semialdehyde2,1-aminomutase	Lysinibacillus	3058.88	K.LVFEK.F	LVFEK	glutamate-1-semialdehyde2,1-aminomutase	TRUE	0.216694		WP_053597181.1	MULTISPECIES:	glutamate-1-semialdehyde2,1-aminomutase	Lysinibacillus	3721.73	K.IIGGGLPVGAYGGKR.E	IIGGGLPVGAYGGKR	glutamate-1-semialdehyde2,1-aminomutase
	WP_012296165.1	MULTISPECIES:	diguanylatecyclase	Lysinibacillus	5340.8	K.QAERNR.V	QAERNR	diguanylatecyclase	TRUE	0.212475		WP_232900890.1	MULTISPECIES:	diguanylatecyclase	Lysinibacillus	6475.59	K.LADQGLLVALEGK.N	LADQGLLVALEGK	diguanylatecyclase
	WP_012293292.1	MULTISPECIES:	translationelongationfactorTs	Lysinibacillus	2634.4	R.DEVSAEEVER.E	DEVSAEEVER	translationelongationfactorTs	TRUE	0.210794		WP_012293292.1	MULTISPECIES:	translationelongationfactorTs	Lysinibacillus	3189.71	R.DEVSAEEVER.E	DEVSAEEVER	translationelongationfactorTs
	WP_012294088.1	MULTISPECIES:	histidinephosphatasefamilyprotein	Lysinibacillus	2348.88	M.GDIVTVC[carbamidomethylationofC]LMR.H	GDIVTVCLMR	histidinephosphatasefamilyprotein	TRUE	0.210216		WP_036161204.1	MULTISPECIES:	histidinephosphatasefamilyprotein	Lysinibacillus	2842.66	K.GLGHGYEILGK.L	GLGHGYEILGK	histidinephosphatasefamilyprotein
	WP_012295792.1	MULTISPECIES:	PHdomain-containingprotein	Lysinibacillus	4142.78	K.RKNVM(oxidationofM)SIK.A	RKNVMSIK	PHdomain-containingprotein	TRUE	0.208031		WP_031418105.1	MULTISPECIES:	PHdomain-containingprotein	Lysinibacillus	5004.61	K.FTIGNSPLSIDIHK.R	FTIGNSPLSIDIHK	PHdomain-containingprotein
	WP_227256907.1	MULTISPECIES:	NEATdomain-containingprotein	Lysinibacillus	4317.68	K.QVSLLDNVR.M	QVSLLDNVR	NEATdomain-containingprotein	TRUE	0.193764		WP_227256907.1	MULTISPECIES:	NEATdomain-containingprotein	Lysinibacillus	5154.3	K.QVSLLDNVR.M	QVSLLDNVR	NEATdomain-containingprotein
	WP_031418629.1	MULTISPECIES:	NADP-dependentisocitratedehydrogenase	Lysinibacillus	2289.83	K.GPLTTPIGGGIR.S	GPLTTPIGGGIR	NADP-dependentisocitratedehydrogenase	TRUE	0.192336		WP_031418629.1	MULTISPECIES:	NADP-dependentisocitratedehydrogenase	Lysinibacillus	2730.24	K.GPLTTPIGGGIR.S	GPLTTPIGGGIR	NADP-dependentisocitratedehydrogenase
	WP_012292731.1	MULTISPECIES:	methylmalonyl-CoAmutasefamilyprotein	Lysinibacillus	2480.81	R.INDRGGVLGAMETQYQR.G	INDRGGVLGAMETQYQR	methylmalonyl-CoAmutasefamilyprotein	TRUE	0.18961		WP_012292731.1	MULTISPECIES:	methylmalonyl-CoAmutasefamilyprotein	Lysinibacillus	2951.2	R.EGEDPKR.Q	EGEDPKR	methylmalonyl-CoAmutasefamilyprotein
	WP_089985339.1	MULTISPECIES:	ribosomerecyclingfactor	Lysinibacillus	2594.18	K.AGEITEDDLR.G	AGEITEDDLR	ribosomerecyclingfactor	TRUE	0.188183		WP_089985339.1	MULTISPECIES:	ribosomerecyclingfactor	Lysinibacillus	3082.36	K.AGEITEDDLR.G	AGEITEDDLR	ribosomerecyclingfactor
	WP_012295849.1	MULTISPECIES:	SAM-dependentmethyltransferase	Lysinibacillus	2930.94	K.QKYDKFK.Q	QKYDKFK	SAM-dependentmethyltransferase	TRUE	0.183585		WP_012295849.1	MULTISPECIES:	SAM-dependentmethyltransferase	Lysinibacillus	3469.02	R.QLNTPSLDIMLQHGLVR.E	QLNTPSLDIMLQHGLVR	SAM-dependentmethyltransferase
	WP_012292471.1	MULTISPECIES:	AraCfamilytranscriptionalregulator	Lysinibacillus	2103.2	R.EVGYSDEFYFSRK.F	EVGYSDEFYFSRK	AraCfamilytranscriptionalregulator	TRUE	0.179091		WP_036161240.1	MULTISPECIES:	AraCfamilytranscriptionalregulator	Lysinibacillus	2479.87	K.SPQPLQTFVK.K	SPQPLQTFVK	AraCfamilytranscriptionalregulator
	WP_080709099.1	MULTISPECIES:	sigma-70familyRNApolymerasesigmafactor	Lysinibacillus	2159.47	K.NPIIKSFLANAK.N	NPIIKSFLANAK	sigma-70familyRNApolymerasesigmafactor	TRUE	0.174484		WP_227256803.1	MULTISPECIES:	sigma-70familyRNApolymerasesigmafactor	Lysinibacillus	2536.27	R.TTAITPEVEM(oxidationofM)LEK.S	TTAITPEVEMLEK	sigma-70familyRNApolymerasesigmafactor
	WP_012293081.1	MULTISPECIES:	ribonucleaseJ1	Lysinibacillus	3856.45	R.LQQATDAAIK.Y	LQQATDAAIK	ribonucleaseJ1	TRUE	0.162452		WP_012293081.1	MULTISPECIES:	ribonucleaseJ1	Lysinibacillus	4482.94	R.LQQATDAAIK.Y	LQQATDAAIK	ribonucleaseJ1
	WP_036162023.1	MULTISPECIES:	ABCtransporterATP-bindingprotein/permease	Lysinibacillus	3489.56	K.TGHIM(oxidationofM)SR.I	TGHIMSR	ABCtransporterATP-bindingprotein/permease	TRUE	0.162247		WP_232901024.1	MULTISPECIES:	ABCtransporterATP-bindingprotein/permease	Lysinibacillus	4055.73	K.GVNLSGGQK.Q	GVNLSGGQK	ABCtransporterATP-bindingprotein/permease
	WP_206701041.1	MULTISPECIES:	TrkHfamilypotassiumuptakeprotein	Lysinibacillus	4260.43	R.GVVKVPWK.K	GVVKVPWK	TrkHfamilypotassiumuptakeprotein	TRUE	0.154317		WP_206701041.1	MULTISPECIES:	TrkHfamilypotassiumuptakeprotein	Lysinibacillus	4917.88	R.GVVKVPWK.K	GVVKVPWK	TrkHfamilypotassiumuptakeprotein
	WP_036161990.1	MULTISPECIES:	non-ribosomalpeptidesynthetase	Lysinibacillus	5351.5	K.VFVKRNGK.T	VFVKRNGK	non-ribosomalpeptidesynthetase	TRUE	0.152202		WP_036161990.1	MULTISPECIES:	non-ribosomalpeptidesynthetase	Lysinibacillus	6166.01	K.VFVKRNGK.T	VFVKRNGK	non-ribosomalpeptidesynthetase
	WP_012293332.1	MULTISPECIES:	ribonucleaseY	Lysinibacillus	14004.4	K.AREILSLALQR.F	AREILSLALQR	ribonucleaseY	TRUE	0.151894		WP_012293332.1	MULTISPECIES:	ribonucleaseY	Lysinibacillus	16131.6	R.RAGLLHDIGK.A	RAGLLHDIGK	ribonucleaseY
	WP_031418679.1	MULTISPECIES:	accessorySecsystemtranslocaseSecA2	Lysinibacillus	1628.53	K.SDAELREMTFIFK.N	SDAELREMTFIFK	accessorySecsystemtranslocaseSecA2	TRUE	0.139388		WP_031418679.1	MULTISPECIES:	accessorySecsystemtranslocaseSecA2	Lysinibacillus	1855.53	R.ITVATNM(oxidationofM)AGR.G	ITVATNMAGR	accessorySecsystemtranslocaseSecA2
	WP_012292528.1	MULTISPECIES:	serinehydrolase	Lysinibacillus	2993.26	R.NTNM(oxidationofM)RNIREK.L	NTNMRNIREK	serinehydrolase	TRUE	0.133299		WP_051563193.1	MULTISPECIES:	serinehydrolase	Lysinibacillus	3392.26	R.DTAEMLRVALQNK.T	DTAEMLRVALQNK	serinehydrolase
	WP_012293567.1	MULTISPECIES:	YitTfamilyprotein	Lysinibacillus	7253.98	K.LTLM(oxidationofM)IITNK.G	LTLMIITNK	YitTfamilyprotein	TRUE	0.126834		WP_139015372.1	MULTISPECIES:	YitTfamilyprotein	Lysinibacillus	8174.03	-.MATKM(oxidationofM)LR.H	MATKMLR	YitTfamilyprotein
	WP_036160903.1	MULTISPECIES:	sensorhistidinekinase	Lysinibacillus	2215.43	-.MMKM(oxidationofM)PVNGK.I	MMKMPVNGK	sensorhistidinekinase	TRUE	0.117087		WP_227256948.1	MULTISPECIES:	sensorhistidinekinase	Lysinibacillus	2474.83	R.KM(oxidationofM)EDVFHEK.N	KMEDVFHEK	sensorhistidinekinase
	WP_012295667.1	MULTISPECIES:	site-specificintegrase	Lysinibacillus	2667.52	R.LGNTPAM(oxidationofM)IYEVYGHVLK.E	LGNTPAMIYEVYGHVLK	site-specificintegrase	TRUE	0.114416		WP_012293621.1	MULTISPECIES:	site-specificintegrase	Lysinibacillus	2972.73	K.NLWVYSKK.W	NLWVYSKK	site-specificintegrase
	WP_008181913.1	MULTISPECIES:	50SribosomalproteinL2	Lysinibacillus	3747.89	K.GLEVGQTIVSGPDADIK.V	GLEVGQTIVSGPDADIK	50SribosomalproteinL2	TRUE	0.113697		WP_008181913.1	MULTISPECIES:	50SribosomalproteinL2	Lysinibacillus	4174.01	R.LQSGEVR.L	LQSGEVR	50SribosomalproteinL2
	WP_012292640.1	MULTISPECIES:	dipeptidase	Lysinibacillus	4007.12	R.DNKLFARGASDDK.G	DNKLFARGASDDK	dipeptidase	TRUE	0.110854		WP_012292640.1	MULTISPECIES:	dipeptidase	Lysinibacillus	4451.32	R.DNKLFARGASDDK.G	DNKLFARGASDDK	dipeptidase
	WP_012293535.1	MULTISPECIES:	class1bribonucleoside-diphosphatereductasesubunitalpha	Lysinibacillus	10206.9	M.KTYLK.L	KTYLK	class1bribonucleoside-diphosphatereductasesubunitalpha	TRUE	0.100559		WP_012293535.1	MULTISPECIES:	class1bribonucleoside-diphosphatereductasesubunitalpha	Lysinibacillus	11233.3	R.ASGVIPVAK.L	ASGVIPVAK	class1bribonucleoside-diphosphatereductasesubunitalpha
	WP_012292554.1	MULTISPECIES:	choice-of-anchorIfamilyprotein	Lysinibacillus	8851.39	K.IGQIGDR.M	IGQIGDR	choice-of-anchorIfamilyprotein	TRUE	0.0983041		WP_012292554.1	MULTISPECIES:	choice-of-anchorIfamilyprotein	Lysinibacillus	9721.52	K.IGQIGDR.M	IGQIGDR	choice-of-anchorIfamilyprotein
	WP_012293257.1	MULTISPECIES:	GTP-sensingpleiotropictranscriptionalregulatorCodY	Lysinibacillus	4086.55	K.FLNALAEIK.M	FLNALAEIK	GTP-sensingpleiotropictranscriptionalregulatorCodY	TRUE	0.0811444		WP_012293257.1	MULTISPECIES:	GTP-sensingpleiotropictranscriptionalregulatorCodY	Lysinibacillus	4418.15	R.LGTLILAR.L	LGTLILAR	GTP-sensingpleiotropictranscriptionalregulatorCodY
	WP_012292692.1	MULTISPECIES:	bacillithiolbiosynthesisdeacetylaseBshB2	Lysinibacillus	1407.31	K.TIEFEDDEK.M	TIEFEDDEK	bacillithiolbiosynthesisdeacetylaseBshB2	TRUE	0.0804742		WP_012292692.1	MULTISPECIES:	bacillithiolbiosynthesisdeacetylaseBshB2	Lysinibacillus	1520.57	K.TIEFEDDEK.M	TIEFEDDEK	bacillithiolbiosynthesisdeacetylaseBshB2
	WP_031416724.1	MULTISPECIES:	DNA-directedRNApolymerasesubunitbeta'	Lysinibacillus	4021.82	R.IIELPIK.S	IIELPIK	DNA-directedRNApolymerasesubunitbeta'	TRUE	0.07945		WP_031416724.1	MULTISPECIES:	DNA-directedRNApolymerasesubunitbeta'	Lysinibacillus	4341.35	R.GLAHNIKSAKR.K	GLAHNIKSAKR	DNA-directedRNApolymerasesubunitbeta'
	WP_107922044.1	MULTISPECIES:	glutamyl-tRNAreductase	Lysinibacillus	4655.49	K.AESLAAKFHGQAK.S	AESLAAKFHGQAK	glutamyl-tRNAreductase	TRUE	0.0662036		WP_107922044.1	MULTISPECIES:	glutamyl-tRNAreductase	Lysinibacillus	4963.7	R.ERAAADITDMIGHEVLQFK.D	ERAAADITDMIGHEVLQFK	glutamyl-tRNAreductase
	WP_031415833.1	MULTISPECIES:	30SribosomalproteinS6	Lysinibacillus	2957.13	R.LANISEDIIR.H	LANISEDIIR	30SribosomalproteinS6	TRUE	0.0646767		WP_031415833.1	MULTISPECIES:	30SribosomalproteinS6	Lysinibacillus	3148.38	R.LANISEDIIR.H	LANISEDIIR	30SribosomalproteinS6
	WP_036225052.1	MULTISPECIES:	2,3-butanedioldehydrogenase	Lysinibacillus	2879.71	K.DRSQC[carbamidomethylationofC]KILVNMSL.-	DRSQCKILVNMSL	2,3-butanedioldehydrogenase	TRUE	0.0592597		WP_036225052.1	MULTISPECIES:	2,3-butanedioldehydrogenase	Lysinibacillus	3050.36	K.ISGSFAYVNIFPEVIR.L	ISGSFAYVNIFPEVIR	2,3-butanedioldehydrogenase
	WP_012295481.1	MULTISPECIES:	uroporphyrinogen-IIIsynthase	Lysinibacillus	5244.05	-.M(oxidationofM)QNDLPLR.G	MQNDLPLR	uroporphyrinogen-IIIsynthase	TRUE	0.0587439		WP_012295481.1	MULTISPECIES:	uroporphyrinogen-IIIsynthase	Lysinibacillus	5552.1	R.HQISAKNFRAK.I	HQISAKNFRAK	uroporphyrinogen-IIIsynthase
	WP_012293095.1	MULTISPECIES:	2-oxoaciddehydrogenasesubunitE2	Lysinibacillus	2045.82	R.SLDDATQEIIQK.H	SLDDATQEIIQK	2-oxoaciddehydrogenasesubunitE2	TRUE	0.056546		WP_012293095.1	MULTISPECIES:	2-oxoaciddehydrogenasesubunitE2	Lysinibacillus	2161.5	R.VIAM(oxidationofM)PSVR.K	VIAMPSVR	2-oxoaciddehydrogenasesubunitE2
	WP_012292718.1	MULTISPECIES:	long-chain-fatty-acid--CoAligase	Lysinibacillus	4291.46	K.GVLFSYR.N	GVLFSYR	long-chain-fatty-acid--CoAligase	TRUE	0.0545238		WP_012292718.1	MULTISPECIES:	long-chain-fatty-acid--CoAligase	Lysinibacillus	4525.44	K.YPKREAVIC[carbamidomethylationofC]HGR.R	YPKREAVICHGR	long-chain-fatty-acid--CoAligase
	WP_012291984.1	MULTISPECIES:	prolinedehydrogenasefamilyprotein	Lysinibacillus	5847.59	K.FEFQM(oxidationofM)LYGFRTDMQK.E	FEFQMLYGFRTDMQK	prolinedehydrogenasefamilyprotein	TRUE	0.0458329		WP_012291984.1	MULTISPECIES:	prolinedehydrogenasefamilyprotein	Lysinibacillus	6115.6	K.FEFQM(oxidationofM)LYGFRTDMQK.E	FEFQMLYGFRTDMQK	prolinedehydrogenasefamilyprotein
	WP_012293962.1	MULTISPECIES:	PepSYdomain-containingprotein	Lysinibacillus	3430.07	K.NLLYSRFWR.L	NLLYSRFWR	PepSYdomain-containingprotein	TRUE	0.0437777		WP_012293962.1	MULTISPECIES:	PepSYdomain-containingprotein	Lysinibacillus	3580.23	R.TWILRR.K	TWILRR	PepSYdomain-containingprotein
	WP_012292245.1	MULTISPECIES:	phosphoglyceratekinase	Lysinibacillus	2274.18	K.TMKDIDVK.G	TMKDIDVK	phosphoglyceratekinase	TRUE	0.0331536		WP_012292245.1	MULTISPECIES:	phosphoglyceratekinase	Lysinibacillus	2349.58	K.ELPGIVALNDK.-	ELPGIVALNDK	phosphoglyceratekinase
	WP_036162380.1	MULTISPECIES:	lowmolecularweightphosphotyrosineproteinphosphatase	Lysinibacillus	4144.96	R.ELVRKEC[carbamidomethylationofC]LDDK.I	ELVRKECLDDK	lowmolecularweightphosphotyrosineproteinphosphatase	TRUE	0.0105727		WP_036162380.1	MULTISPECIES:	lowmolecularweightphosphotyrosineproteinphosphatase	Lysinibacillus	4188.79	K.EELL.-	EELL	lowmolecularweightphosphotyrosineproteinphosphatase
	WP_012293320.1	MULTISPECIES:	BMPfamilyprotein	Lysinibacillus	2850.72	R.GAIPEDVQK.V	GAIPEDVQK	BMPfamilyprotein	TRUE	0.0078595		WP_012293320.1	MULTISPECIES:	BMPfamilyprotein	Lysinibacillus	2873.12	K.AVNPDIDIQVK.Y	AVNPDIDIQVK	BMPfamilyprotein
	WP_012295420.1	MULTISPECIES:	N-acetylmuramoyl-L-alanineamidase	Lysinibacillus	4419.94	K.KPDLNAKK.I	KPDLNAKK	N-acetylmuramoyl-L-alanineamidase	TRUE	0.0065608		WP_036161427.1	MULTISPECIES:	N-acetylmuramoyl-L-alanineamidase	Lysinibacillus	4448.94	K.RYYDKFVDNK.-	RYYDKFVDNK	N-acetylmuramoyl-L-alanineamidase
	WP_012291863.1	MULTISPECIES:	DNApolymeraseIIIsubunitdelta'	Lysinibacillus	4889.62	R.SRC[carbamidomethylationofC]QHIK.F	SRCQHIK	DNApolymeraseIIIsubunitdelta'	TRUE	0.00221938		WP_012291863.1	MULTISPECIES:	DNApolymeraseIIIsubunitdelta'	Lysinibacillus	4900.47	K.QMESILQARASLQRNM(oxidationofM)NR.T	QMESILQARASLQRNMNR	DNApolymeraseIIIsubunitdelta'
	WP_012292448.1	MULTISPECIES:	GMCfamilyoxidoreductase	Lysinibacillus	2672.83	K.FEKTAGISGDDK.N	FEKTAGISGDDK	GMCfamilyoxidoreductase	TRUE	-0.0236074		WP_012292448.1	MULTISPECIES:	GMCfamilyoxidoreductase	Lysinibacillus	2609.73	K.FEKTAGISGDDK.N	FEKTAGISGDDK	GMCfamilyoxidoreductase
	WP_012292330.1	MULTISPECIES:	Fe-SclusterassemblyproteinSufD	Lysinibacillus	4387.98	R.VLM(oxidationofM)LSEKAR.G	VLMLSEKAR	Fe-SclusterassemblyproteinSufD	TRUE	-0.0430854		WP_012292330.1	MULTISPECIES:	Fe-SclusterassemblyproteinSufD	Lysinibacillus	4198.92	R.ARLARDAK.V	ARLARDAK	Fe-SclusterassemblyproteinSufD
	WP_012296164.1	MULTISPECIES:	decarboxylatingNADP(+)-dependentphosphogluconatedehydrogenase	Lysinibacillus	1949.23	K.GNSC[carbamidomethylationofC]C[carbamidomethylationofC]TYMGPK.G	GNSCCTYMGPK	decarboxylatingNADP(+)-dependentphosphogluconatedehydrogenase	TRUE	-0.0450558		WP_103119027.1	MULTISPECIES:	decarboxylatingNADP(+)-dependentphosphogluconatedehydrogenase	Lysinibacillus	1861.4	R.YISSLKEER.I	YISSLKEER	decarboxylatingNADP(+)-dependentphosphogluconatedehydrogenase
	WP_206700980.1	MULTISPECIES:	DUF3006familyprotein	Lysinibacillus	4075.09	R.ADIQNLMDR.L	ADIQNLMDR	DUF3006familyprotein	TRUE	-0.0525792		WP_206700980.1	MULTISPECIES:	DUF3006familyprotein	Lysinibacillus	3860.82	R.ADIQNLMDR.L	ADIQNLMDR	DUF3006familyprotein
	WP_206701070.1	MULTISPECIES:	imidazolonepropionase	Lysinibacillus	2663.4	K.EKM(oxidationofM)REIAIVENGSILIEEDR.I	EKMREIAIVENGSILIEEDR	imidazolonepropionase	TRUE	-0.0541782		WP_206701070.1	MULTISPECIES:	imidazolonepropionase	Lysinibacillus	2519.1	K.IIDASGK.V	IIDASGK	imidazolonepropionase
	WP_012292176.1	MULTISPECIES:	DNArepairexonuclease	Lysinibacillus	3421.51	R.KFQDAMEK.L	KFQDAMEK	DNArepairexonuclease	TRUE	-0.0788423		WP_012292176.1	MULTISPECIES:	DNArepairexonuclease	Lysinibacillus	3151.75	K.EIRSSTFDAFDK.I	EIRSSTFDAFDK	DNArepairexonuclease
	WP_012293201.1	MULTISPECIES:	peptideABCtransportersubstrate-bindingprotein	Lysinibacillus	3051.74	K.ADILGNISLK.E	ADILGNISLK	peptideABCtransportersubstrate-bindingprotein	TRUE	-0.0836572		WP_232735586.1	MULTISPECIES:	peptideABCtransportersubstrate-bindingprotein	Lysinibacillus	2796.44	R.AEALANAEK.-	AEALANAEK	peptideABCtransportersubstrate-bindingprotein
	WP_012292766.1	MULTISPECIES:	F0F1ATPsynthasesubunitalpha	Lysinibacillus	4306.61	K.AIDALVPIGR.G	AIDALVPIGR	F0F1ATPsynthasesubunitalpha	TRUE	-0.088902		WP_012292766.1	MULTISPECIES:	F0F1ATPsynthasesubunitalpha	Lysinibacillus	3923.74	R.IM(oxidationofM)EVPVGEELIGR.V	IMEVPVGEELIGR	F0F1ATPsynthasesubunitalpha
	WP_012293809.1	MULTISPECIES:	methyl-acceptingchemotaxisprotein	Lysinibacillus	4083.96	K.TLVAQFKL.-	TLVAQFKL	methyl-acceptingchemotaxisprotein	TRUE	-0.0901506		WP_012291945.1	MULTISPECIES:	methyl-acceptingchemotaxisprotein	Lysinibacillus	3715.79	K.LAEQSEASAR.E	LAEQSEASAR	methyl-acceptingchemotaxisprotein
	WP_103117223.1	MULTISPECIES:	serine--tRNAligase	Lysinibacillus	4981.15	K.VTGSRFLFYR.G	VTGSRFLFYR	serine--tRNAligase	TRUE	-0.0977194		WP_103117223.1	MULTISPECIES:	serine--tRNAligase	Lysinibacillus	4494.39	K.ELDVQLNNVEERFK.D	ELDVQLNNVEERFK	serine--tRNAligase
	WP_012295540.1	MULTISPECIES:	DUF421domain-containingprotein	Lysinibacillus	3516.51	K.KPEYQGTQK.S	KPEYQGTQK	DUF421domain-containingprotein	TRUE	-0.119831		WP_012295540.1	MULTISPECIES:	DUF421domain-containingprotein	Lysinibacillus	3095.13	K.HGKIDR.K	HGKIDR	DUF421domain-containingprotein
	WP_012292936.1	MULTISPECIES:	TVP38/TMEM64familyprotein	Lysinibacillus	5348.66	R.FITGSKK.V	FITGSKK	TVP38/TMEM64familyprotein	TRUE	-0.120335		WP_012292936.1	MULTISPECIES:	TVP38/TMEM64familyprotein	Lysinibacillus	4705.03	K.QARNLTK.N	QARNLTK	TVP38/TMEM64familyprotein
	WP_083227131.1	MULTISPECIES:	tRNA(adenosine(37)-N6)-threonylcarbamoyltransferasecomplexATPasesubunittype1TsaE	Lysinibacillus	2153.77	R.VPFNHLDVYR.L	VPFNHLDVYR	tRNA(adenosine(37)-N6)-threonylcarbamoyltransferasecomplexATPasesubunittype1TsaE	TRUE	-0.127852		WP_083227131.1	MULTISPECIES:	tRNA(adenosine(37)-N6)-threonylcarbamoyltransferasecomplexATPasesubunittype1TsaE	Lysinibacillus	1878.41	R.VGENQRR.F	VGENQRR	tRNA(adenosine(37)-N6)-threonylcarbamoyltransferasecomplexATPasesubunittype1TsaE
	WP_036161745.1	MULTISPECIES:	ABCtransporterpermease	Lysinibacillus	2686.03	R.LLDPHLMM(oxidationofM)KNR.R	LLDPHLMMKNR	ABCtransporterpermease	TRUE	-0.13761		WP_036220980.1	MULTISPECIES:	ABCtransporterpermease	Lysinibacillus	2316.4	R.SSM(oxidationofM)LEVISQDYIK.T	SSMLEVISQDYIK	ABCtransporterpermease
	WP_012291901.1	MULTISPECIES:	cysteinesynthaseA	Lysinibacillus	4155.77	K.VAREEGILC[carbamidomethylationofC]GISSGAAIYAAIEAAK.R	VAREEGILCGISSGAAIYAAIEAAK	cysteinesynthaseA	TRUE	-0.143107		WP_012291901.1	MULTISPECIES:	cysteinesynthaseA	Lysinibacillus	3561.05	R.LALAM(oxidationofM)IEAAEK.D	LALAMIEAAEK	cysteinesynthaseA
	WP_202341242.1	MULTISPECIES:	Nif3-likedinuclearmetalcenterhexamericprotein	Lysinibacillus	4373.74	R.LANIR.T	LANIR	Nif3-likedinuclearmetalcenterhexamericprotein	TRUE	-0.143517		WP_036127167.1	MULTISPECIES:	Nif3-likedinuclearmetalcenterhexamericprotein	Lysinibacillus	3746.04	K.VMIAGVAAK.M	VMIAGVAAK	Nif3-likedinuclearmetalcenterhexamericprotein
	WP_115673784.1	MULTISPECIES:	carbamoyl-phosphatesynthaselargesubunit	Lysinibacillus	6167.66	K.RNLGTQM(oxidationofM)KATGEVM(oxidationofM)ALGR.T	RNLGTQMKATGEVMALGR	carbamoyl-phosphatesynthaselargesubunit	TRUE	-0.144434		WP_115673784.1	MULTISPECIES:	carbamoyl-phosphatesynthaselargesubunit	Lysinibacillus	5276.84	K.KIAELWETTPEELYAYR.K	KIAELWETTPEELYAYR	carbamoyl-phosphatesynthaselargesubunit
	WP_068983117.1	MULTISPECIES:	translationinitiationfactorIF-2	Lysinibacillus	2636.34	K.AAEVPIIVAVNK.M	AAEVPIIVAVNK	translationinitiationfactorIF-2	TRUE	-0.15005		WP_036121394.1	MULTISPECIES:	translationinitiationfactorIF-2	Lysinibacillus	2240.76	K.ATPEKNVAAK.K	ATPEKNVAAK	translationinitiationfactorIF-2
	WP_012291986.1	MULTISPECIES:	phosphateABCtransporterATP-bindingprotein	Lysinibacillus	1699.51	K.SALLKAPTNPR.V	SALLKAPTNPR	phosphateABCtransporterATP-bindingprotein	TRUE	-0.1539		WP_012291986.1	MULTISPECIES:	phosphateABCtransporterATP-bindingprotein	Lysinibacillus	1437.96	K.MILKSITGSFPK.G	MILKSITGSFPK	phosphateABCtransporterATP-bindingprotein
	WP_036160354.1	MULTISPECIES:	ATP-dependentzincmetalloproteaseFtsH	Lysinibacillus	2702.61	K.EITSATIQPDK.S	EITSATIQPDK	ATP-dependentzincmetalloproteaseFtsH	TRUE	-0.155776		WP_036160354.1	MULTISPECIES:	ATP-dependentzincmetalloproteaseFtsH	Lysinibacillus	2281.61	K.EITSATIQPDK.S	EITSATIQPDK	ATP-dependentzincmetalloproteaseFtsH
	WP_012292024.1	MULTISPECIES:	DNAhelicasePcrA	Lysinibacillus	4002.69	R.LM(oxidationofM)YVGVTRAEERLYLTC[carbamidomethylationofC]AQSR.T	LMYVGVTRAEERLYLTCAQSR	DNAhelicasePcrA	TRUE	-0.156274		WP_012292024.1	MULTISPECIES:	DNAhelicasePcrA	Lysinibacillus	3377.17	R.ILQAANDVIQNNTTR.Y	ILQAANDVIQNNTTR	DNAhelicasePcrA
	WP_126657807.1	MULTISPECIES:	precorrin-6Areductase	Lysinibacillus	4672.03	K.ELNMALYR.Q	ELNMALYR	precorrin-6Areductase	TRUE	-0.160582		WP_126657807.1	MULTISPECIES:	precorrin-6Areductase	Lysinibacillus	3921.78	R.EHRGTVM(oxidationofM)LTTGSK.T	EHRGTVMLTTGSK	precorrin-6Areductase
	WP_012291937.1	MULTISPECIES:	twin-argininetranslocasesubunitTatC	Lysinibacillus	3651.14	R.QIEEALEQQR.R	QIEEALEQQR	twin-argininetranslocasesubunitTatC	TRUE	-0.175527		WP_012291937.1	MULTISPECIES:	twin-argininetranslocasesubunitTatC	Lysinibacillus	3010.27	R.QIEEALEQQRR.Q	QIEEALEQQRR	twin-argininetranslocasesubunitTatC
	WP_107922665.1	MULTISPECIES:	phBC6A51familyhelix-turn-helixprotein	Lysinibacillus	4964.02	K.EVGVSDR.S	EVGVSDR	phBC6A51familyhelix-turn-helixprotein	TRUE	-0.180815		WP_036120740.1	MULTISPECIES:	phBC6A51familyhelix-turn-helixprotein	Lysinibacillus	4066.45	R.HLPAMLEYK.V	HLPAMLEYK	phBC6A51familyhelix-turn-helixprotein
	WP_012296214.1	MULTISPECIES:	acyl-CoAdehydrogenase	Lysinibacillus	5853.43	R.NLGMDAITETSR.L	NLGMDAITETSR	acyl-CoAdehydrogenase	TRUE	-0.18139		WP_012292728.1	MULTISPECIES:	acyl-CoAdehydrogenase	Lysinibacillus	4791.68	R.YFRDAK.V	YFRDAK	acyl-CoAdehydrogenase
	WP_012293316.1	MULTISPECIES:	aspartate-semialdehydedehydrogenase	Lysinibacillus	2348.69	K.TQSANWEAGR.D	TQSANWEAGR	aspartate-semialdehydedehydrogenase	TRUE	-0.184863		WP_012293316.1	MULTISPECIES:	aspartate-semialdehydedehydrogenase	Lysinibacillus	1914.5	R.DVEANILPSGSDK.R	DVEANILPSGSDK	aspartate-semialdehydedehydrogenase
	WP_082340366.1	MULTISPECIES:	amidasefamilyprotein	Lysinibacillus	2269.05	R.GMYHGIPM(oxidationofM)ALK.D	GMYHGIPMALK	amidasefamilyprotein	TRUE	-0.192392		WP_081010925.1	MULTISPECIES:	amidasefamilyprotein	Lysinibacillus	1832.5	R.ASIQSLVDSGAK.V	ASIQSLVDSGAK	amidasefamilyprotein
	WP_008180932.1	MULTISPECIES:	RNApolymerasesporulationsigmafactorSigK	Lysinibacillus	14991.1	K.KTRLATYAAR.C	KTRLATYAAR	RNApolymerasesporulationsigmafactorSigK	TRUE	-0.193034		WP_008180932.1	MULTISPECIES:	RNApolymerasesporulationsigmafactorSigK	Lysinibacillus	12097.3	R.ALIKLYQLYKR.D	ALIKLYQLYKR	RNApolymerasesporulationsigmafactorSigK
	WP_012295214.1	MULTISPECIES:	ABCtransporterATP-bindingprotein	Lysinibacillus	3957.89	R.ALVSDPK.L	ALVSDPK	ABCtransporterATP-bindingprotein	TRUE	-0.193213		WP_012293496.1	MULTISPECIES:	ABCtransporterATP-bindingprotein	Lysinibacillus	3193.17	R.LEINNITK.K	LEINNITK	ABCtransporterATP-bindingprotein
	WP_126659346.1	MULTISPECIES:	chaperoninGroEL	Lysinibacillus	3371.03	K.VTLGPK.G	VTLGPK	chaperoninGroEL	TRUE	-0.204146		WP_126659346.1	MULTISPECIES:	chaperoninGroEL	Lysinibacillus	2682.85	K.VTLGPK.G	VTLGPK	chaperoninGroEL
	WP_010857015.1	MULTISPECIES:	AbrB/MazE/SpoVTfamilyDNA-bindingdomain-containingprotein	Lysinibacillus	4311.85	R.VVIPIELR.R	VVIPIELR	AbrB/MazE/SpoVTfamilyDNA-bindingdomain-containingprotein	TRUE	-0.209368		WP_010857015.1	MULTISPECIES:	AbrB/MazE/SpoVTfamilyDNA-bindingdomain-containingprotein	Lysinibacillus	3409.09	R.TLGIAEK.D	TLGIAEK	AbrB/MazE/SpoVTfamilyDNA-bindingdomain-containingprotein
	WP_036075052.1	MULTISPECIES:	phagebaseplateassemblyproteinV	Lysinibacillus	3905.82	K.TLRTKHGK.Q	TLRTKHGK	phagebaseplateassemblyproteinV	TRUE	-0.22536		WP_036075052.1	MULTISPECIES:	phagebaseplateassemblyproteinV	Lysinibacillus	3025.6	K.DNSIKMEDKM(oxidationofM)EIK.G	DNSIKMEDKMEIK	phagebaseplateassemblyproteinV
	WP_031416518.1	MULTISPECIES:	MurR/RpiRfamilytranscriptionalregulator	Lysinibacillus	5035.91	-.M(oxidationofM)SIREDIK.K	MSIREDIK	MurR/RpiRfamilytranscriptionalregulator	TRUE	-0.231247		WP_031416518.1	MULTISPECIES:	MurR/RpiRfamilytranscriptionalregulator	Lysinibacillus	3871.37	-.M(oxidationofM)SIREDIK.K	MSIREDIK	MurR/RpiRfamilytranscriptionalregulator
	WP_012292276.1	MULTISPECIES:	DNAcytosinemethyltransferase	Lysinibacillus	16980.2	R.DFGVPQLR.E	DFGVPQLR	DNAcytosinemethyltransferase	TRUE	-0.231589		WP_012292276.1	MULTISPECIES:	DNAcytosinemethyltransferase	Lysinibacillus	13047.8	K.YKQIGNAVPVLLAK.E	YKQIGNAVPVLLAK	DNAcytosinemethyltransferase
	WP_025113851.1	MULTISPECIES:	RNApolymerasesporulationsigmafactorSigE	Lysinibacillus	27626.5	R.LLASLKKFWSK.F	LLASLKKFWSK	RNApolymerasesporulationsigmafactorSigE	TRUE	-0.24414		WP_025113851.1	MULTISPECIES:	RNApolymerasesporulationsigmafactorSigE	Lysinibacillus	20881.7	R.LEKKIIQDLR.E	LEKKIIQDLR	RNApolymerasesporulationsigmafactorSigE
	WP_031417987.1	MULTISPECIES:	ubiquinol-cytochromecreductaseiron-sulfursubunit	Lysinibacillus	3567.59	R.FAIDPVLQK.H	FAIDPVLQK	ubiquinol-cytochromecreductaseiron-sulfursubunit	TRUE	-0.245973		WP_031417987.1	MULTISPECIES:	ubiquinol-cytochromecreductaseiron-sulfursubunit	Lysinibacillus	2690.05	R.FAIDPVLQK.H	FAIDPVLQK	ubiquinol-cytochromecreductaseiron-sulfursubunit
	WP_036160867.1	MULTISPECIES:	VOCfamilyprotein	Lysinibacillus	3302.96	K.LC[carbamidomethylationofC]YVR.G	LCYVR	VOCfamilyprotein	TRUE	-0.252554		WP_012293959.1	MULTISPECIES:	VOCfamilyprotein	Lysinibacillus	2468.78	R.FEFRDPFGNR.V	FEFRDPFGNR	VOCfamilyprotein
	WP_012293805.1	MULTISPECIES:	dynaminfamilyprotein	Lysinibacillus	4292	R.LYLESMQEGFK.V	LYLESMQEGFK	dynaminfamilyprotein	TRUE	-0.262521		WP_012293805.1	MULTISPECIES:	dynaminfamilyprotein	Lysinibacillus	3165.25	R.VTNFR.L	VTNFR	dynaminfamilyprotein
	WP_012293450.1	MULTISPECIES:	LysRfamilytranscriptionalregulator	Lysinibacillus	4503.37	M.NLHALR.L	NLHALR	LysRfamilytranscriptionalregulator	TRUE	-0.270196		WP_031419566.1	MULTISPECIES:	LysRfamilytranscriptionalregulator	Lysinibacillus	3286.58	R.SIM(oxidationofM)LNRYGELFLYR.V	SIMLNRYGELFLYR	LysRfamilytranscriptionalregulator
	WP_012292923.1	MULTISPECIES:	DUF4097familybetastrandrepeat-containingprotein	Lysinibacillus	2208.69	K.VDVGIQDVSK.M	VDVGIQDVSK	DUF4097familybetastrandrepeat-containingprotein	TRUE	-0.270714		WP_012292923.1	MULTISPECIES:	DUF4097familybetastrandrepeat-containingprotein	Lysinibacillus	1610.77	K.APLM(oxidationofM)NESEEETR.N	APLMNESEEETR	DUF4097familybetastrandrepeat-containingprotein
	WP_012294172.1	MULTISPECIES:	collagenase	Lysinibacillus	2674.49	R.VIGNDK.A	VIGNDK	collagenase	TRUE	-0.274537		WP_012294172.1	MULTISPECIES:	collagenase	Lysinibacillus	1940.24	R.SFHDKC[carbamidomethylationofC]LPALK.A	SFHDKCLPALK	collagenase
	WP_036161677.1	MULTISPECIES:	IS607familytransposase	Lysinibacillus	12257.5	K.IVVLYKDRLVR.F	IVVLYKDRLVR	IS607familytransposase	TRUE	-0.277248		WP_036161677.1	MULTISPECIES:	IS607familytransposase	Lysinibacillus	8859.13	K.IVVLYKDRLVR.F	IVVLYKDRLVR	IS607familytransposase
	WP_058844806.1	MULTISPECIES:	alaninedehydrogenase	Lysinibacillus	4218.2	R.LVTEKMVK.A	LVTEKMVK	alaninedehydrogenase	TRUE	-0.278367		WP_031418618.1	MULTISPECIES:	alaninedehydrogenase	Lysinibacillus	3043.99	K.QAC[carbamidomethylationofC]LDNAALK.K	QACLDNAALK	alaninedehydrogenase
	WP_036161702.1	MULTISPECIES:	MBLfoldmetallo-hydrolase	Lysinibacillus	3298.85	R.DYLLNVISEFNK.H	DYLLNVISEFNK	MBLfoldmetallo-hydrolase	TRUE	-0.301263		WP_012296174.1	MULTISPECIES:	MBLfoldmetallo-hydrolase	Lysinibacillus	2305.03	R.SEYSFFEGMK.R	SEYSFFEGMK	MBLfoldmetallo-hydrolase
	WP_012293310.1	MULTISPECIES:	polyribonucleotidenucleotidyltransferase	Lysinibacillus	23991.8	K.VVLQEEKER.A	VVLQEEKER	polyribonucleotidenucleotidyltransferase	TRUE	-0.306719		WP_012293310.1	MULTISPECIES:	polyribonucleotidenucleotidyltransferase	Lysinibacillus	16633.1	K.IRPDGRK.L	IRPDGRK	polyribonucleotidenucleotidyltransferase
	WP_036161987.1	MULTISPECIES:	AMP-bindingprotein	Lysinibacillus	2495.52	K.SQHM(oxidationofM)GQKPLFK.Y	SQHMGQKPLFK	AMP-bindingprotein	TRUE	-0.314093		WP_031419385.1	MULTISPECIES:	AMP-bindingprotein	Lysinibacillus	1711.69	R.EVEEVLYER.E	EVEEVLYER	AMP-bindingprotein
	WP_068983953.1	MULTISPECIES:	dephospho-CoAkinase	Lysinibacillus	2278.25	R.QEM(oxidationofM)LRQRDAYLEAGEK.H	QEMLRQRDAYLEAGEK	dephospho-CoAkinase	TRUE	-0.327548		WP_103118646.1	MULTISPECIES:	dephospho-CoAkinase	Lysinibacillus	1532.01	R.MHSQLPM(oxidationofM)SVKEK.G	MHSQLPMSVKEK	dephospho-CoAkinase
	WP_012293968.1	MULTISPECIES:	DUF418domain-containingprotein	Lysinibacillus	7661.75	K.NKPQRMV.-	NKPQRMV	DUF418domain-containingprotein	TRUE	-0.342295		WP_012293968.1	MULTISPECIES:	DUF418domain-containingprotein	Lysinibacillus	5039.18	K.NKPQRMV.-	NKPQRMV	DUF418domain-containingprotein
	WP_012293452.1	MULTISPECIES:	methyltransferasedomain-containingprotein	Lysinibacillus	3359.09	R.ATIREM(oxidationofM)YR.L	ATIREMYR	methyltransferasedomain-containingprotein	TRUE	-0.344199		WP_012295869.1	MULTISPECIES:	methyltransferasedomain-containingprotein	Lysinibacillus	2202.89	R.LLAPNGC[carbamidomethylationofC]IVK.V	LLAPNGCIVK	methyltransferasedomain-containingprotein
	WP_225316267.1	MULTISPECIES:	isoprenyltransferase	Lysinibacillus	12257.7	M.DTLSLEERVALTK.S	DTLSLEERVALTK	isoprenyltransferase	TRUE	-0.345933		WP_225316267.1	MULTISPECIES:	isoprenyltransferase	Lysinibacillus	8017.33	M.DTLSLEERVALTK.S	DTLSLEERVALTK	isoprenyltransferase
	WP_012291833.1	MULTISPECIES:	DNAgyrasesubunitA	Lysinibacillus	4407.66	K.TMQITDKNGPMVAVK.T	TMQITDKNGPMVAVK	DNAgyrasesubunitA	TRUE	-0.363311		WP_012291833.1	MULTISPECIES:	DNAgyrasesubunitA	Lysinibacillus	2806.31	R.RTEFDLRK.A	RTEFDLRK	DNAgyrasesubunitA
	WP_036160791.1	MULTISPECIES:	tyrosine-typerecombinase/integrase	Lysinibacillus	3899.84	R.SREINTLFQFYSK.Q	SREINTLFQFYSK	tyrosine-typerecombinase/integrase	TRUE	-0.363618		WP_217581112.1	MULTISPECIES:	tyrosine-typerecombinase/integrase	Lysinibacillus	2481.79	K.WVLTER.Q	WVLTER	tyrosine-typerecombinase/integrase
	WP_031416030.1	MULTISPECIES:	DNAtopoisomeraseIVsubunitB	Lysinibacillus	2922.62	R.KRPGMYIGSTDGR.G	KRPGMYIGSTDGR	DNAtopoisomeraseIVsubunitB	TRUE	-0.38065		WP_031416030.1	MULTISPECIES:	DNAtopoisomeraseIVsubunitB	Lysinibacillus	1810.13	R.DFGRGM(oxidationofM)PTGM(oxidationofM)HK.M	DFGRGMPTGMHK	DNAtopoisomeraseIVsubunitB
	WP_012293172.1	MULTISPECIES:	RNA-bindingprotein	Lysinibacillus	25629.4	R.LHLTGIGKVK.V	LHLTGIGKVK	RNA-bindingprotein	TRUE	-0.386237		WP_012293172.1	MULTISPECIES:	RNA-bindingprotein	Lysinibacillus	15730.4	R.LHLTGIGKVK.V	LHLTGIGKVK	RNA-bindingprotein
	WP_051563248.1	MULTISPECIES:	DUF3885domain-containingprotein	Lysinibacillus	7827.23	R.YIKNKELK.Y	YIKNKELK	DUF3885domain-containingprotein	TRUE	-0.390958		WP_051563248.1	MULTISPECIES:	DUF3885domain-containingprotein	Lysinibacillus	4767.11	K.ELKYHLK.Q	ELKYHLK	DUF3885domain-containingprotein
	WP_107922374.1	MULTISPECIES:	leucine--tRNAligase	Lysinibacillus	2278.61	K.SDLERTDLAKEK.T	SDLERTDLAKEK	leucine--tRNAligase	TRUE	-0.40073		WP_107922374.1	MULTISPECIES:	leucine--tRNAligase	Lysinibacillus	1365.5	K.VEGIAKAIEWLEQK.G	VEGIAKAIEWLEQK	leucine--tRNAligase
	WP_012296215.1	MULTISPECIES:	redox-regulatedATPaseYchF	Lysinibacillus	13951.8	R.AAELSDDELKVIK.G	AAELSDDELKVIK	redox-regulatedATPaseYchF	TRUE	-0.406519		WP_012296215.1	MULTISPECIES:	redox-regulatedATPaseYchF	Lysinibacillus	8280.16	R.AAELSDDELKVIK.G	AAELSDDELKVIK	redox-regulatedATPaseYchF
	WP_012295888.1	MULTISPECIES:	rhodanese-likedomain-containingprotein	Lysinibacillus	4506.02	K.NMPLGSGFNKLPK.D	NMPLGSGFNKLPK	rhodanese-likedomain-containingprotein	TRUE	-0.41277		WP_012295887.1	MULTISPECIES:	rhodanese-likedomain-containingprotein	Lysinibacillus	2646.07	R.SARATEILEGK.G	SARATEILEGK	rhodanese-likedomain-containingprotein
	WP_012295491.1	MULTISPECIES:	triggerfactor	Lysinibacillus	8469.59	K.ELDSEVESVEALR.A	ELDSEVESVEALR	triggerfactor	TRUE	-0.415188		WP_012295491.1	MULTISPECIES:	triggerfactor	Lysinibacillus	4953.11	K.VLPELNDEFAK.E	VLPELNDEFAK	triggerfactor
	WP_031418973.1	MULTISPECIES:	ATP-dependentDNAhelicaseRecG	Lysinibacillus	3825.41	K.GLIQQKR.F	GLIQQKR	ATP-dependentDNAhelicaseRecG	TRUE	-0.42063		WP_031418973.1	MULTISPECIES:	ATP-dependentDNAhelicaseRecG	Lysinibacillus	2216.33	K.ERMQSM(oxidationofM)TETNDGFR.L	ERMQSMTETNDGFR	ATP-dependentDNAhelicaseRecG
	WP_012292174.1	MULTISPECIES:	rhodanese-relatedsulfurtransferase	Lysinibacillus	14896.6	K.SVGQLHGGIATYAK.D	SVGQLHGGIATYAK	rhodanese-relatedsulfurtransferase	TRUE	-0.42355		WP_115674027.1	MULTISPECIES:	rhodanese-relatedsulfurtransferase	Lysinibacillus	8587.16	K.HARNR.Y	HARNR	rhodanese-relatedsulfurtransferase
	WP_012293479.1	MULTISPECIES:	baseplateJ/gp47familyprotein	Lysinibacillus	3157.88	K.ASNLELDK.E	ASNLELDK	baseplateJ/gp47familyprotein	TRUE	-0.424296		WP_012295278.1	MULTISPECIES:	baseplateJ/gp47familyprotein	Lysinibacillus	1818	R.DVNPSEVVK.R	DVNPSEVVK	baseplateJ/gp47familyprotein
	WP_075807287.1	MULTISPECIES:	zinc-ribbondomain-containingprotein	Lysinibacillus	6121.13	K.GFNWSSLEQYGK.I	GFNWSSLEQYGK	zinc-ribbondomain-containingprotein	TRUE	-0.431363		WP_053595650.1	MULTISPECIES:	zinc-ribbondomain-containingprotein	Lysinibacillus	3480.7	K.NSILSTDIVK.F	NSILSTDIVK	zinc-ribbondomain-containingprotein
	WP_036161309.1	MULTISPECIES:	ABCtransporterpermease/substrate-bindingprotein	Lysinibacillus	15348.8	R.LLKVELPLALPVIMAGIR.T	LLKVELPLALPVIMAGIR	ABCtransporterpermease/substrate-bindingprotein	TRUE	-0.432228		WP_036161309.1	MULTISPECIES:	ABCtransporterpermease/substrate-bindingprotein	Lysinibacillus	8714.6	K.SIEQAVK.A	SIEQAVK	ABCtransporterpermease/substrate-bindingprotein
	WP_012294001.1	MULTISPECIES:	sporulationprotein	Lysinibacillus	21030.6	K.LQQLISKHI.-	LQQLISKHI	sporulationprotein	TRUE	-0.452414		WP_012294001.1	MULTISPECIES:	sporulationprotein	Lysinibacillus	11516.1	K.DYIRVEPTSLASHILDAIGQLGFR.L	DYIRVEPTSLASHILDAIGQLGFR	sporulationprotein
	WP_012292938.1	MULTISPECIES:	helicase-exonucleaseAddABsubunitAddA	Lysinibacillus	3238.37	R.EMPFTISR.V	EMPFTISR	helicase-exonucleaseAddABsubunitAddA	TRUE	-0.455026		WP_012292938.1	MULTISPECIES:	helicase-exonucleaseAddABsubunitAddA	Lysinibacillus	1764.82	R.QFIRSEGQGVQTTTFEK.L	QFIRSEGQGVQTTTFEK	helicase-exonucleaseAddABsubunitAddA
	WP_012295462.1	MULTISPECIES:	50SribosomalproteinL21	Lysinibacillus	7501.38	K.NYRRK.Q	NYRRK	50SribosomalproteinL21	TRUE	-0.457116		WP_012295462.1	MULTISPECIES:	50SribosomalproteinL21	Lysinibacillus	4072.38	K.VLFVGGENVK.V	VLFVGGENVK	50SribosomalproteinL21
	WP_155591959.1	MULTISPECIES:	flagellinHag	Lysinibacillus	4158.65	R.AGDDAAGLAISEK.M	AGDDAAGLAISEK	flagellinHag	TRUE	-0.459326		WP_155591959.1	MULTISPECIES:	flagellinHag	Lysinibacillus	2248.48	R.AGDDAAGLAISEK.M	AGDDAAGLAISEK	flagellinHag
	WP_012295721.1	MULTISPECIES:	amidohydrolasefamilyprotein	Lysinibacillus	3162.23	R.EMHIHIDK.T	EMHIHIDK	amidohydrolasefamilyprotein	TRUE	-0.469428		WP_012292021.1	MULTISPECIES:	amidohydrolasefamilyprotein	Lysinibacillus	1677.79	K.EDMIKAFEEMK.A	EDMIKAFEEMK	amidohydrolasefamilyprotein
	WP_012293094.1	MULTISPECIES:	alpha-ketoaciddehydrogenasesubunitbeta	Lysinibacillus	3056.57	R.AIVVQEAQK.Q	AIVVQEAQK	alpha-ketoaciddehydrogenasesubunitbeta	TRUE	-0.504234		WP_012293094.1	MULTISPECIES:	alpha-ketoaciddehydrogenasesubunitbeta	Lysinibacillus	1515.35	K.AAEELEK.E	AAEELEK	alpha-ketoaciddehydrogenasesubunitbeta
	WP_012292787.1	MULTISPECIES:	DUF5693familyprotein	Lysinibacillus	31353.2	R.LHSININRQTKLK.L	LHSININRQTKLK	DUF5693familyprotein	TRUE	-0.527741		WP_012292787.1	MULTISPECIES:	DUF5693familyprotein	Lysinibacillus	14806.8	R.LHSININRQTKLK.L	LHSININRQTKLK	DUF5693familyprotein
	WP_012293492.1	MULTISPECIES:	Na/Picotransporterfamilyprotein	Lysinibacillus	8133.86	K.M(oxidationofM)AIESLDKQDR.S	MAIESLDKQDR	Na/Picotransporterfamilyprotein	TRUE	-0.54764		WP_031416973.1	MULTISPECIES:	Na/Picotransporterfamilyprotein	Lysinibacillus	3679.43	K.EEVLRM(oxidationofM)GEHALR.G	EEVLRMGEHALR	Na/Picotransporterfamilyprotein
	WP_012295593.1	MULTISPECIES:	transportersubstrate-bindingdomain-containingprotein	Lysinibacillus	5119.14	K.NNEIQSIEDLK.G	NNEIQSIEDLK	transportersubstrate-bindingdomain-containingprotein	TRUE	-0.550392		WP_031418189.1	MULTISPECIES:	transportersubstrate-bindingdomain-containingprotein	Lysinibacillus	2301.61	K.KESSSGDAGADK.E	KESSSGDAGADK	transportersubstrate-bindingdomain-containingprotein
	WP_012293385.1	MULTISPECIES:	recombinasefamilyprotein	Lysinibacillus	12404.9	R.RIHNAKIR.R	RIHNAKIR	recombinasefamilyprotein	TRUE	-0.556999		WP_012293385.1	MULTISPECIES:	recombinasefamilyprotein	Lysinibacillus	5495.39	R.AVENGYRPENNLSNR.G	AVENGYRPENNLSNR	recombinasefamilyprotein
	WP_036160656.1	MULTISPECIES:	FtsX-likepermeasefamilyprotein	Lysinibacillus	9631.41	K.RLVN.-	RLVN	FtsX-likepermeasefamilyprotein	TRUE	-0.567381		WP_036160656.1	MULTISPECIES:	FtsX-likepermeasefamilyprotein	Lysinibacillus	4166.73	K.ELASVIAK.E	ELASVIAK	FtsX-likepermeasefamilyprotein
	WP_225341041.1	MULTISPECIES:	formatedehydrogenaseaccessorysulfurtransferaseFdhD	Lysinibacillus	15796.9	K.VSKIGC[carbamidomethylationofC]SIVLSK.S	VSKIGCSIVLSK	formatedehydrogenaseaccessorysulfurtransferaseFdhD	TRUE	-0.576192		WP_031416178.1	MULTISPECIES:	formatedehydrogenaseaccessorysulfurtransferaseFdhD	Lysinibacillus	6694.87	M.ERAVTRK.I	ERAVTRK	formatedehydrogenaseaccessorysulfurtransferaseFdhD
	WP_036161951.1	MULTISPECIES:	DUF6138familyprotein	Lysinibacillus	5161.75	K.ALVQELENK.E	ALVQELENK	DUF6138familyprotein	TRUE	-0.599672		WP_036161951.1	MULTISPECIES:	DUF6138familyprotein	Lysinibacillus	2066.39	K.NEEIEPYMEKK.K	NEEIEPYMEKK	DUF6138familyprotein
	WP_012294062.1	MULTISPECIES:	hypotheticalprotein	Lysinibacillus	17367.9	K.LIMVLVAVFVVK.K	LIMVLVAVFVVK	hypotheticalprotein	TRUE	-0.643912		WP_012295303.1	MULTISPECIES:	hypotheticalprotein	Lysinibacillus	6184.51	K.DTAIVFGQETAM(oxidationofM)HAER.V	DTAIVFGQETAMHAER	hypotheticalprotein
	WP_036161200.1	MULTISPECIES:	ABC-Ftyperibosomalprotectionprotein	Lysinibacillus	20017.6	R.IGLIGVNGAGKSTLLK.M	IGLIGVNGAGKSTLLK	ABC-Ftyperibosomalprotectionprotein	TRUE	-0.646904		WP_012295993.1	MULTISPECIES:	ABC-Ftyperibosomalprotectionprotein	Lysinibacillus	7068.12	K.ITQAGNMSKREAHAKPNLTFM(oxidationofM)TK.S	ITQAGNMSKREAHAKPNLTFMTK	ABC-Ftyperibosomalprotectionprotein
	WP_031416725.1	MULTISPECIES:	DNA-directedRNApolymerasesubunitbeta	Lysinibacillus	10490.6	K.QVVSAATAC[carbamidomethylationofC]IPFLENDDSNR.A	QVVSAATACIPFLENDDSNR	DNA-directedRNApolymerasesubunitbeta	TRUE	-0.647402		WP_031416725.1	MULTISPECIES:	DNA-directedRNApolymerasesubunitbeta	Lysinibacillus	3698.95	K.LAHMVDDK.L	LAHMVDDK	DNA-directedRNApolymerasesubunitbeta
	WP_171821110.1	MULTISPECIES:	DNAtranslocaseFtsK	Lysinibacillus	3859.49	K.NAPKKPSNRR.S	NAPKKPSNRR	DNAtranslocaseFtsK	TRUE	-0.652063		WP_171821110.1	MULTISPECIES:	DNAtranslocaseFtsK	Lysinibacillus	1342.86	R.AARIVDQM(oxidationofM)EQR.G	AARIVDQMEQR	DNAtranslocaseFtsK
	WP_012293302.1	MULTISPECIES:	transcriptionterminationfactorNusA	Lysinibacillus	4115.58	K.VLDVQVNEEEK.S	VLDVQVNEEEK	transcriptionterminationfactorNusA	TRUE	-0.652717		WP_012293302.1	MULTISPECIES:	transcriptionterminationfactorNusA	Lysinibacillus	1429.27	R.NFGRIAAQTAK.Q	NFGRIAAQTAK	transcriptionterminationfactorNusA
	WP_031415837.1	MULTISPECIES:	mechanosensitiveionchannelfamilyprotein	Lysinibacillus	15903.8	K.KLFLIRM(oxidationofM)R.S	KLFLIRMR	mechanosensitiveionchannelfamilyprotein	TRUE	-0.659371		WP_031415837.1	MULTISPECIES:	mechanosensitiveionchannelfamilyprotein	Lysinibacillus	5417.31	K.KLFLIRM(oxidationofM)R.S	KLFLIRMR	mechanosensitiveionchannelfamilyprotein
	WP_012294079.1	MULTISPECIES:	aspartatekinase	Lysinibacillus	7532.45	K.LQIVVDRFR.A	LQIVVDRFR	aspartatekinase	TRUE	-0.667789		WP_012294079.1	MULTISPECIES:	aspartatekinase	Lysinibacillus	2502.36	K.VVNDPVEIK.E	VVNDPVEIK	aspartatekinase
	WP_031419072.1	MULTISPECIES:	(2Fe-2S)-bindingprotein	Lysinibacillus	10230.1	K.VWQSLM(oxidationofM)KVSK.I	VWQSLMKVSK	(2Fe-2S)-bindingprotein	TRUE	-0.675191		WP_012291914.1	MULTISPECIES:	(2Fe-2S)-bindingprotein	Lysinibacillus	3322.82	R.KNDEVSLK.H	KNDEVSLK	(2Fe-2S)-bindingprotein
	WP_012295447.1	MULTISPECIES:	preproteintranslocasesubunitYajC	Lysinibacillus	8120.81	R.QAIGRVEKDI.-	QAIGRVEKDI	preproteintranslocasesubunitYajC	TRUE	-0.688295		WP_012295447.1	MULTISPECIES:	preproteintranslocasesubunitYajC	Lysinibacillus	2531.3	R.QAIGRVEK.D	QAIGRVEK	preproteintranslocasesubunitYajC
	WP_085961712.1	MULTISPECIES:	IS3familytransposase	Lysinibacillus	13990.1	K.DVATREIVAYEVSTNLR.M	DVATREIVAYEVSTNLR	IS3familytransposase	TRUE	-0.698984		WP_012293488.1	MULTISPECIES:	IS3familytransposase	Lysinibacillus	4211.23	R.IKQLEMENAYLK.K	IKQLEMENAYLK	IS3familytransposase
	WP_012292031.1	MULTISPECIES:	cytochromeubiquinoloxidasesubunitI	Lysinibacillus	21936.4	R.QPWILYGLMR.T	QPWILYGLMR	cytochromeubiquinoloxidasesubunitI	TRUE	-0.722086		WP_012292031.1	MULTISPECIES:	cytochromeubiquinoloxidasesubunitI	Lysinibacillus	6096.42	R.GWQFIHSRWYR.W	GWQFIHSRWYR	cytochromeubiquinoloxidasesubunitI
	WP_012295634.1	MULTISPECIES:	classISAM-dependentmethyltransferase	Lysinibacillus	12901.5	K.AIQIAILKGMR.K	AIQIAILKGMR	classISAM-dependentmethyltransferase	TRUE	-0.732306		WP_031416726.1	MULTISPECIES:	classISAM-dependentmethyltransferase	Lysinibacillus	3453.66	R.TVC[carbamidomethylationofC]M(oxidationofM)M(oxidationofM)DINERAVALSQK.N	TVCMMDINERAVALSQK	classISAM-dependentmethyltransferase
	WP_012295401.1	MULTISPECIES:	GTPpyrophosphokinasefamilyprotein	Lysinibacillus	20343.3	R.VKSPKSILTK.M	VKSPKSILTK	GTPpyrophosphokinasefamilyprotein	TRUE	-0.738429		WP_012292963.1	MULTISPECIES:	GTPpyrophosphokinasefamilyprotein	Lysinibacillus	5321.21	K.VKLKGMR.S	VKLKGMR	GTPpyrophosphokinasefamilyprotein
	WP_036161669.1	MULTISPECIES:	DNAhelicaseRecQ	Lysinibacillus	15080.5	R.KEAVAVKK.L	KEAVAVKK	DNAhelicaseRecQ	TRUE	-0.788471		WP_036161669.1	MULTISPECIES:	DNAhelicaseRecQ	Lysinibacillus	3189.97	K.TLRELC[carbamidomethylationofC]DK.K	TLRELCDK	DNAhelicaseRecQ
	WP_036161697.1	MULTISPECIES:	nitroreductasefamilyprotein	Lysinibacillus	14560.4	K.EIVEFAVK.Y	EIVEFAVK	nitroreductasefamilyprotein	TRUE	-0.798602		WP_036161697.1	MULTISPECIES:	nitroreductasefamilyprotein	Lysinibacillus	2932.44	K.ERRSYYGISK.E	ERRSYYGISK	nitroreductasefamilyprotein
	WP_012295436.1	MULTISPECIES:	indole-3-glycerolphosphatesynthaseTrpC	Lysinibacillus	28091.1	K.VNLQRTKEIAK.A	VNLQRTKEIAK	indole-3-glycerolphosphatesynthaseTrpC	TRUE	-0.811905		WP_012295436.1	MULTISPECIES:	indole-3-glycerolphosphatesynthaseTrpC	Lysinibacillus	5283.81	K.QVAAM(oxidationofM)GASGVLVGEALMR.S	QVAAMGASGVLVGEALMR	indole-3-glycerolphosphatesynthaseTrpC
	WP_036162823.1	MULTISPECIES:	polysaccharidebiosynthesisprotein	Lysinibacillus	33007.1	R.GSVIPLFIEQIK.A	GSVIPLFIEQIK	polysaccharidebiosynthesisprotein	TRUE	-0.814489		WP_036162823.1	MULTISPECIES:	polysaccharidebiosynthesisprotein	Lysinibacillus	6123.16	K.IKFYIGDVR.D	IKFYIGDVR	polysaccharidebiosynthesisprotein
	WP_036220092.1	MULTISPECIES:	assimilatorysulfitereductase(NADPH)flavoproteinsubunit	Lysinibacillus	26616.3	K.LLNELLPQLTLEQK.I	LLNELLPQLTLEQK	assimilatorysulfitereductase(NADPH)flavoproteinsubunit	TRUE	-0.815085		WP_036220092.1	MULTISPECIES:	assimilatorysulfitereductase(NADPH)flavoproteinsubunit	Lysinibacillus	4921.76	K.KVYVQHK.L	KVYVQHK	assimilatorysulfitereductase(NADPH)flavoproteinsubunit
	WP_036160873.1	MULTISPECIES:	SDRfamilyoxidoreductase	Lysinibacillus	28189.4	K.SEIPLTIIRPGIVR.G	SEIPLTIIRPGIVR	SDRfamilyoxidoreductase	TRUE	-0.821639		WP_012293892.1	MULTISPECIES:	SDRfamilyoxidoreductase	Lysinibacillus	5027.87	K.VFAVNTTAVM(oxidationofM)R.S	VFAVNTTAVMR	SDRfamilyoxidoreductase
	WP_217581672.1	MULTISPECIES:	CoA-acylatingmethylmalonate-semialdehydedehydrogenase	Lysinibacillus	21314.4	K.RVEVLHRFR.Q	RVEVLHRFR	CoA-acylatingmethylmalonate-semialdehydedehydrogenase	TRUE	-0.822274		WP_036160881.1	MULTISPECIES:	CoA-acylatingmethylmalonate-semialdehydedehydrogenase	Lysinibacillus	3788.12	K.YIYETGSKYGK.R	YIYETGSKYGK	CoA-acylatingmethylmalonate-semialdehydedehydrogenase
	WP_031416614.1	MULTISPECIES:	polysaccharidedeacetylasefamilyprotein	Lysinibacillus	19198.2	K.ALEEIIPALKK.Q	ALEEIIPALKK	polysaccharidedeacetylasefamilyprotein	TRUE	-0.833884		WP_012295334.1	MULTISPECIES:	polysaccharidedeacetylasefamilyprotein	Lysinibacillus	3189.13	K.SILVRPPYGK.K	SILVRPPYGK	polysaccharidedeacetylasefamilyprotein
	WP_012291979.1	MULTISPECIES:	methioninesynthase	Lysinibacillus	26392	K.VIEEALKFSQGK.A	VIEEALKFSQGK	methioninesynthase	TRUE	-0.835632		WP_012291979.1	MULTISPECIES:	methioninesynthase	Lysinibacillus	4338.01	R.FTETK.I	FTETK	methioninesynthase
	WP_036122959.1	MULTISPECIES:	arginine--tRNAligase	Lysinibacillus	40785.8	K.IEVVLDKLK.A	IEVVLDKLK	arginine--tRNAligase	TRUE	-0.862849		WP_053596489.1	MULTISPECIES:	arginine--tRNAligase	Lysinibacillus	5593.83	K.VVADAAKHRTPHR.I	VVADAAKHRTPHR	arginine--tRNAligase
	WP_012292740.1	MULTISPECIES:	classIIfructose-bisphosphatase	Lysinibacillus	7112.48	K.GTNGAMTVLAIADK.G	GTNGAMTVLAIADK	classIIfructose-bisphosphatase	TRUE	-0.871383		WP_012292740.1	MULTISPECIES:	classIIfructose-bisphosphatase	Lysinibacillus	914.789	K.GTNGAM(oxidationofM)TVLAIADK.G	GTNGAMTVLAIADK	classIIfructose-bisphosphatase
	WP_036161618.1	MULTISPECIES:	MATEfamilyeffluxtransporter	Lysinibacillus	33029.4	K.EKYALLLK.M	EKYALLLK	MATEfamilyeffluxtransporter	TRUE	-0.895376		WP_036161618.1	MULTISPECIES:	MATEfamilyeffluxtransporter	Lysinibacillus	3455.66	R.KPAWLQWK.E	KPAWLQWK	MATEfamilyeffluxtransporter
	WP_012293669.1	MULTISPECIES:	5'-nucleotidaseC-terminaldomain-containingprotein	Lysinibacillus	3593.11	K.M(oxidationofM)IAGALK.L	MIAGALK	5'-nucleotidaseC-terminaldomain-containingprotein	TRUE	-0.911416		WP_012293669.1	MULTISPECIES:	5'-nucleotidaseC-terminaldomain-containingprotein	Lysinibacillus	318.291	R.GQAAKM(oxidationofM)IAGALKLDTIEVVNPNFK.D	GQAAKMIAGALKLDTIEVVNPNFK	5'-nucleotidaseC-terminaldomain-containingprotein
	WP_048391396.1	MULTISPECIES:	tRNA(adenosine(37)-N6)-dimethylallyltransferaseMiaA	Lysinibacillus	22950.9	R.AKIAEIQARQK.L	AKIAEIQARQK	tRNA(adenosine(37)-N6)-dimethylallyltransferaseMiaA	TRUE	-0.9134		WP_048391396.1	MULTISPECIES:	tRNA(adenosine(37)-N6)-dimethylallyltransferaseMiaA	Lysinibacillus	1987.56	R.AKIAEIQARQK.L	AKIAEIQARQK	tRNA(adenosine(37)-N6)-dimethylallyltransferaseMiaA
	WP_012292397.1	MULTISPECIES:	ornithine--oxo-acidtransaminase	Lysinibacillus	31429.1	K.LKEINNPVIK.E	LKEINNPVIK	ornithine--oxo-acidtransaminase	TRUE	-0.936991		WP_012292397.1	MULTISPECIES:	ornithine--oxo-acidtransaminase	Lysinibacillus	1980.31	K.EINNPVIK.E	EINNPVIK	ornithine--oxo-acidtransaminase
	WP_012292683.1	MULTISPECIES:	aspartateaminotransferasefamilyprotein	Lysinibacillus	25612.2	R.ILDVVVESLK.K	ILDVVVESLK	aspartateaminotransferasefamilyprotein	TRUE	-0.946307		WP_036161519.1	MULTISPECIES:	aspartateaminotransferasefamilyprotein	Lysinibacillus	1375.21	K.EYYQRLRNIC[carbamidomethylationofC]DR.N	EYYQRLRNICDR	aspartateaminotransferasefamilyprotein
