# Supplementary material for: What transcriptomics and proteomics can tell us about a high borate perturbed boron tolerant Bacilli strain
Source: Royal Society of Chemistry journal article supplement (doi:10.1039/d3mo00023k), 2023-04-04
Supplement: d3mo00023k5.xlsx [file d3mo00023k5.xlsx]

## Sheet: PSM
Filename	Spectrum Number	Spectrum ID	Spectrum Title	Retention Time (minutes)	Precursor m/z	Precursor Intensity	Precursor Charge	Precursor Mass (Da)	Experimental Peaks	Total Intensity	Peptide Sequence	Base Peptide Sequence	Protein Description	Start Residue Number	Stop Residue Number	Missed Cleavages	Theoretical Mass (Da)	Precursor Mass Error (Da)	Precursor Mass Error (ppm)	Matching Products	Total Products	Ratio of Matching Products	Matching Intensity	Fraction of Intensity Matching	Morpheus Score	Target?	Decoy?	Cumulative Target	Cumulative Decoy	Q-Value (%)
F:\25-03-2022\20220324-TEST BROTH-POS-00.d	5388	scanId=3048525		50.8086	855.951	1541.3	2	1709.89	113	8585.54	K.DINDLIANLDALPADK.Q	DINDLIANLDALPADK	WP_012295184.1 MULTISPECIES: superoxide dismutase [Lysinibacillus]	52	67	0	1709.88	0.004583	2.6803	12	30	0.4	2051.05	0.238895	12.2389	TRUE	FALSE	1	0	0
F:\25-03-2022\20220324-TEST BROTH-POS-00.d	5411	scanId=3062376		51.0395	855.953	1547.73	2	1709.89	106	7124.7	K.DINDLIANLDALPADK.Q	DINDLIANLDALPADK	WP_012295184.1 MULTISPECIES: superoxide dismutase [Lysinibacillus]	52	67	0	1709.88	0.00711995	4.164	12	30	0.4	1135.23	0.159337	12.1593	TRUE	FALSE	2	0	0
F:\25-03-2022\20220324-TEST BROTH-POS-00.d	6256	scanId=3548534		59.1421	1078.56	1207.41	2	2155.1	112	6819.08	R.VFNVLGEVIDLGEEIPADAR.R	VFNVLGEVIDLGEEIPADAR	WP_012292768.1 MULTISPECIES: F0F1 ATP synthase subunit beta [Lysinibacillus]	93	112	0	2155.12	-0.0145425	-6.74788	12	38	0.315789	1013.59	0.148641	12.1486	TRUE	FALSE	3	0	0
F:\25-03-2022\20220324-TEST BROTH-POS-00.d	4674	scanId=2646581		44.1095	728.422	1502.36	2	1454.83	87	6095.55	K.IGFVGGVDIPVINR.F	IGFVGGVDIPVINR	WP_012293320.1 MULTISPECIES: BMP family protein [Lysinibacillus]	175	188	0	1454.82	0.00438029	3.01087	10	26	0.384615	1277.49	0.209577	10.2096	TRUE	FALSE	4	0	0
F:\25-03-2022\20220324-TEST BROTH-POS-00.d	3623	scanId=2092709		34.8784	621.859	4921.63	2	1241.7	85	7660.11	K.LEGVLQPLVM(oxidation of M)K.V	LEGVLQPLVMK	WP_012295327.1 MULTISPECIES: molecular chaperone DnaK [Lysinibacillus]	561	571	0	1241.71	-0.00127105	-1.02364	10	20	0.5	1435.72	0.187428	10.1874	TRUE	FALSE	5	0	0
F:\25-03-2022\20220324-TEST BROTH-POS-00.d	4179	scanId=2397775		39.9628	636.844	3153.81	2	1271.67	92	7650.66	R.DLATDLIINER.I	DLATDLIINER	WP_012296051.1 MULTISPECIES: 50S ribosomal protein L17 [Lysinibacillus]	19	29	0	1271.67	0.00103987	0.817717	10	20	0.5	1337.57	0.17483	10.1748	TRUE	FALSE	6	0	0
F:\25-03-2022\20220324-TEST BROTH-POS-00.d	3122	scanId=1794867		29.9143	565.308	5198.04	2	1128.6	89	8013.77	K.ALEAGELEGIK.A	ALEAGELEGIK	WP_012295327.1 MULTISPECIES: molecular chaperone DnaK [Lysinibacillus]	545	555	0	1128.6	-0.00114223	-1.01208	9	20	0.45	1633.32	0.203814	9.20381	TRUE	FALSE	7	0	0
F:\25-03-2022\20220324-TEST BROTH-POS-00.d	2953	scanId=1694316		28.2385	874.467	736.693	2	1746.92	55	3452.55	R.AGAVSM(oxidation of M)IPTTTGAAVAVSK.V	AGAVSMIPTTTGAAVAVSK	WP_031417788.1 MULTISPECIES: type I glyceraldehyde-3-phosphate dehydrogenase [Lysinibacillus]	200	218	0	1746.92	0.00142597	0.816277	9	36	0.25	654.956	0.189702	9.1897	TRUE	FALSE	8	0	0
F:\25-03-2022\20220324-TEST BROTH-POS-00.d	3579	scanId=2068281		34.4712	849.949	988.587	2	1697.88	71	4493.91	K.GLEVGQTIVSGPDADIK.V	GLEVGQTIVSGPDADIK	WP_008181913.1 MULTISPECIES: 50S ribosomal protein L2 [Lysinibacillus]	109	125	0	1697.88	-0.00102892	-0.606001	9	32	0.28125	655.303	0.14582	9.14582	TRUE	FALSE	9	0	0
F:\25-03-2022\20220324-TEST BROTH-POS-00.d	4004	scanId=2306445		38.4406	602.834	1676.03	2	1203.65	91	6921.12	K.SAFGIVLPDSAK.E	SAFGIVLPDSAK	WP_024363933.1 MULTISPECIES: co-chaperone GroES [Lysinibacillus]	20	31	0	1203.65	0.00373375	3.10202	9	22	0.409091	772.094	0.111556	9.11156	TRUE	FALSE	10	0	0
F:\25-03-2022\20220324-TEST BROTH-POS-00.d	3388	scanId=1952486		32.5413	806.953	1594.39	2	1611.89	68	4141.42	R.VLNSTGALSLQEVPGK.L	VLNSTGALSLQEVPGK	WP_012293096.1 MULTISPECIES: dihydrolipoyl dehydrogenase [Lysinibacillus]	163	178	0	1611.88	0.0074359	4.61318	8	30	0.266667	868.766	0.209775	8.20977	TRUE	FALSE	11	0	0
F:\25-03-2022\20220324-TEST BROTH-POS-00.d	4268	scanId=2443210		40.72	591.366	2266.65	2	1180.72	92	7203.95	R.AILSLEAPVLR.V	AILSLEAPVLR	WP_012293094.1 MULTISPECIES: alpha-ketoacid dehydrogenase subunit beta [Lysinibacillus]	281	291	0	1180.72	-0.000369465	-0.312916	8	20	0.4	1355.23	0.188123	8.18812	TRUE	FALSE	12	0	0
F:\25-03-2022\20220324-TEST BROTH-POS-00.d	4425	scanId=2522011		42.0334	658.865	4460.72	2	1315.72	115	9115.14	K.FDEITLPLVNR.T	FDEITLPLVNR	WP_012295327.1 MULTISPECIES: molecular chaperone DnaK [Lysinibacillus]	275	285	0	1315.71	0.00183772	1.39674	8	20	0.4	1682.64	0.184599	8.1846	TRUE	FALSE	13	0	0
F:\25-03-2022\20220324-TEST BROTH-POS-00.d	2566	scanId=1467341		24.4555	609.303	700.075	2	1216.59	35	2248.48	R.AGDDAAGLAISEK.M	AGDDAAGLAISEK	WP_155591959.1 MULTISPECIES: flagellin Hag [Lysinibacillus]	39	51	0	1216.59	-0.00246509	-2.02623	8	24	0.333333	412.283	0.183361	8.18336	TRUE	FALSE	14	0	0
F:\25-03-2022\20220324-TEST BROTH-POS-00.d	3823	scanId=2205152		36.7524	849.964	1414.48	2	1697.91	66	4341.76	K.LVGDLPNGTTATDLALK.V	LVGDLPNGTTATDLALK	WP_036161804.1 MULTISPECIES: aconitate hydratase AcnA [Lysinibacillus]	256	272	0	1697.92	-0.00710974	-4.18733	8	32	0.25	526.369	0.121234	8.12123	TRUE	FALSE	15	0	0
F:\25-03-2022\20220324-TEST BROTH-POS-00.d	3694	scanId=2132038		35.5338	512.811	1715.59	2	1023.61	55	4426.09	K.AIDALVPIGR.G	AIDALVPIGR	WP_012292766.1 MULTISPECIES: F0F1 ATP synthase subunit alpha [Lysinibacillus]	152	161	0	1023.61	0.00042062	0.410919	8	18	0.444444	441.444	0.0997367	8.09974	TRUE	FALSE	16	0	0
F:\25-03-2022\20220324-TEST BROTH-POS-00.d	2841	scanId=1630331		27.172	680.852	1733.95	2	1359.69	75	5310.77	R.VGNDGVITIEESK.G	VGNDGVITIEESK	WP_068986766.1 MULTISPECIES: chaperonin GroEL [Lysinibacillus]	167	179	0	1359.69	0.000797597	0.586603	8	24	0.333333	518.738	0.0976764	8.09768	TRUE	FALSE	17	0	0
F:\25-03-2022\20220324-TEST BROTH-POS-00.d	5384	scanId=3045755		50.7625	721.921	1246.8	2	1441.83	109	8868.29	R.AVLELAGITDILSK.S	AVLELAGITDILSK	WP_008181711.1 MULTISPECIES: 30S ribosomal protein S5 [Lysinibacillus]	114	127	0	1441.84	-0.0108332	-7.51347	8	26	0.307692	729.553	0.0822653	8.08227	TRUE	FALSE	18	0	0
F:\25-03-2022\20220324-TEST BROTH-POS-00.d	3163	scanId=1819959		30.3325	569.834	1225.8	2	1137.65	58	4163.31	K.GPLTTPIGGGIR.S	GPLTTPIGGGIR	WP_031418629.1 MULTISPECIES: NADP-dependent isocitrate dehydrogenase [Lysinibacillus]	90	101	0	1137.65	0.00243927	2.14413	7	22	0.318182	883.055	0.212104	7.2121	TRUE	FALSE	19	0	0
F:\25-03-2022\20220324-TEST BROTH-POS-00.d	3748	scanId=2163390		36.0564	729.387	891.879	2	1456.76	72	5003.22	R.IM(oxidation of M)EVPVGEELIGR.V	IMEVPVGEELIGR	WP_012292766.1 MULTISPECIES: F0F1 ATP synthase subunit alpha [Lysinibacillus]	94	106	0	1456.76	-0.00101528	-0.696945	7	24	0.291667	842.222	0.168336	7.16834	TRUE	FALSE	20	0	0
F:\25-03-2022\20220324-TEST BROTH-POS-00.d	5047	scanId=2846551		47.4424	889.484	924.424	2	1776.95	42	2411.08	K.IINFLQSEFGVNQIR.F	IINFLQSEFGVNQIR	WP_031418629.1 MULTISPECIES: NADP-dependent isocitrate dehydrogenase [Lysinibacillus]	164	178	0	1776.95	0.000939993	0.528992	7	28	0.25	347.301	0.144044	7.14404	TRUE	FALSE	21	0	0
F:\25-03-2022\20220324-TEST BROTH-POS-00.d	2458	scanId=1406453		23.4408	491.79	6082.58	2	981.565	64	11702.8	R.IPAVQEAVR.K	IPAVQEAVR	WP_012295327.1 MULTISPECIES: molecular chaperone DnaK [Lysinibacillus]	316	324	0	981.561	0.00457336	4.65928	7	16	0.4375	1538.72	0.131483	7.13148	TRUE	FALSE	22	0	0
F:\25-03-2022\20220324-TEST BROTH-POS-00.d	4393	scanId=2505736		41.7621	658.866	1608.7	2	1315.72	84	6226.81	K.FDEITLPLVNR.T	FDEITLPLVNR	WP_012295327.1 MULTISPECIES: molecular chaperone DnaK [Lysinibacillus]	275	285	0	1315.71	0.00315732	2.3997	7	20	0.35	682.075	0.109538	7.10954	TRUE	FALSE	23	0	0
F:\25-03-2022\20220324-TEST BROTH-POS-00.d	2507	scanId=1434153		23.9024	584.828	1234.44	2	1167.64	36	3352.55	K.NVTAGANPVGIR.K	NVTAGANPVGIR	WP_126659346.1 MULTISPECIES: chaperonin GroEL [Lysinibacillus]	105	116	0	1167.64	0.00481241	4.1215	6	22	0.272727	1187.05	0.354073	6.35407	TRUE	FALSE	24	0	0
F:\25-03-2022\20220324-TEST BROTH-POS-00.d	2298	scanId=1308945		21.8156	499.766	1640.64	2	997.518	38	3550.43	K.AQEVPDAIR.K	AQEVPDAIR	WP_008181711.1 MULTISPECIES: 30S ribosomal protein S5 [Lysinibacillus]	54	62	0	997.519	-0.00112931	-1.13212	6	16	0.375	987.156	0.278039	6.27804	TRUE	FALSE	25	0	0
F:\25-03-2022\20220324-TEST BROTH-POS-00.d	2593	scanId=1483074		24.7178	503.765	1856.2	2	1005.52	46	3579.73	R.SLM(oxidation of M)LQGVDK.L	SLMLQGVDK	WP_068986766.1 MULTISPECIES: chaperonin GroEL [Lysinibacillus]	13	21	0	1005.52	-0.00075793	-0.753772	6	16	0.375	629.799	0.175935	6.17593	TRUE	FALSE	26	0	0
F:\25-03-2022\20220324-TEST BROTH-POS-00.d	2424	scanId=1385680		23.0945	445.238	1365.6	2	888.461	54	3955.1	K.SADISALGR.A	SADISALGR	WP_036075467.1 MULTISPECIES: chaperonin GroEL [Lysinibacillus]	309	317	0	888.466	-0.00538498	-6.06098	6	16	0.375	694.384	0.175567	6.17557	TRUE	FALSE	27	0	0
F:\25-03-2022\20220324-TEST BROTH-POS-00.d	2050	scanId=1160806		19.3466	509.762	1204.23	2	1017.51	54	4550.69	R.IEDALNSTR.A	IEDALNSTR	WP_126659346.1 MULTISPECIES: chaperonin GroEL [Lysinibacillus]	394	402	0	1017.51	0.000344094	0.338172	6	16	0.375	778.673	0.171111	6.17111	TRUE	FALSE	28	0	0
F:\25-03-2022\20220324-TEST BROTH-POS-00.d	2276	scanId=1295925		21.5986	478.772	1399.25	2	955.53	54	4476.47	K.LEVPASNVK.K	LEVPASNVK	WP_008181717.1 MULTISPECIES: 30S ribosomal protein S8 [Lysinibacillus]	25	33	0	955.534	-0.0037244	-3.89772	6	16	0.375	755.622	0.168799	6.1688	TRUE	FALSE	29	0	0
F:\25-03-2022\20220324-TEST BROTH-POS-00.d	3309	scanId=1906336		31.7721	902.44	1510.56	2	1802.86	57	3499.64	K.DNTTIVEGVGGADAIESR.I	DNTTIVEGVGGADAIESR	WP_036075467.1 MULTISPECIES: chaperonin GroEL [Lysinibacillus]	326	343	0	1802.86	-0.000165724	-0.0919227	6	34	0.176471	559.083	0.159755	6.15975	TRUE	FALSE	30	0	0
F:\25-03-2022\20220324-TEST BROTH-POS-00.d	3969	scanId=2287113		38.1184	522.31	1098.66	2	1042.61	78	5978.95	K.ADILGNISLK.E	ADILGNISLK	WP_012293201.1 MULTISPECIES: peptide ABC transporter substrate-binding protein [Lysinibacillus]	537	546	0	1042.6	0.00313597	3.00783	6	18	0.333333	908.63	0.151971	6.15197	TRUE	FALSE	31	0	0
F:\25-03-2022\20220324-TEST BROTH-POS-00.d	2055	scanId=1163521		19.3919	423.225	2805.24	2	844.435	64	5135.81	K.LGELEER.V	LGELEER	WP_008181711.1 MULTISPECIES: 30S ribosomal protein S5 [Lysinibacillus]	9	15	0	844.429	0.00587242	6.95431	6	12	0.5	769.794	0.149887	6.14989	TRUE	FALSE	32	0	0
F:\25-03-2022\20220324-TEST BROTH-POS-00.d	2468	scanId=1412272		23.5377	445.74	798.562	2	889.466	42	2634.22	K.LGEFAPTR.T	LGEFAPTR	WP_008181911.1 MULTISPECIES: 30S ribosomal protein S19 [Lysinibacillus]	71	78	0	889.466	0.000665762	0.748496	6	14	0.428571	387.469	0.147091	6.14709	TRUE	FALSE	33	0	0
F:\25-03-2022\20220324-TEST BROTH-POS-00.d	2867	scanId=1645397		27.4231	680.852	1005.99	2	1359.69	41	2767.57	R.VGNDGVITIEESK.G	VGNDGVITIEESK	WP_068986766.1 MULTISPECIES: chaperonin GroEL [Lysinibacillus]	167	179	0	1359.69	0.000336569	0.247534	6	24	0.25	350.004	0.126466	6.12647	TRUE	FALSE	34	0	0
F:\25-03-2022\20220324-TEST BROTH-POS-00.d	3981	scanId=2293428		38.2237	524.277	1675.44	2	1046.54	69	5205.24	R.TPEGLLDFR.R	TPEGLLDFR	WP_012295562.1 MULTISPECIES: succinate dehydrogenase flavoprotein subunit [Lysinibacillus]	106	114	0	1046.54	0.000761029	0.727186	6	16	0.375	606.765	0.116568	6.11657	TRUE	FALSE	35	0	0
F:\25-03-2022\20220324-TEST BROTH-POS-00.d	4028	scanId=2319459		38.6575	901.457	1475.67	2	1800.9	82	5985.84	K.EDLITAPVGTTLEDAEK.I	EDLITAPVGTTLEDAEK	WP_012291837.1 MULTISPECIES: IMP dehydrogenase [Lysinibacillus]	160	176	0	1800.9	-0.000733802	-0.407464	6	32	0.1875	685.975	0.1146	6.1146	TRUE	FALSE	36	0	0
F:\25-03-2022\20220324-TEST BROTH-POS-00.d	4135	scanId=2375407		39.59	817.435	1322.5	2	1632.86	70	4100.96	R.ADAVIM(oxidation of M)ATGGPGIIFGK.T	ADAVIMATGGPGIIFGK	WP_012295562.1 MULTISPECIES: succinate dehydrogenase flavoprotein subunit [Lysinibacillus]	189	205	0	1632.85	0.00060744	0.372011	6	32	0.1875	351.599	0.0857359	6.08574	TRUE	FALSE	37	0	0
F:\25-03-2022\20220324-TEST BROTH-POS-00.d	3772	scanId=2176907		36.2816	729.392	1369.1	2	1456.77	51	3923.74	R.IM(oxidation of M)EVPVGEELIGR.V	IMEVPVGEELIGR	WP_012292766.1 MULTISPECIES: F0F1 ATP synthase subunit alpha [Lysinibacillus]	94	106	0	1456.76	0.0103052	7.07408	6	24	0.25	317.316	0.0808707	6.08087	TRUE	FALSE	38	0	0
F:\25-03-2022\20220324-TEST BROTH-POS-00.d	3096	scanId=1780133		29.6687	565.3	1230.99	2	1128.59	59	4044.82	K.ALEAGELEGIK.A	ALEAGELEGIK	WP_012295327.1 MULTISPECIES: molecular chaperone DnaK [Lysinibacillus]	545	555	0	1128.6	-0.0162079	-14.3611	5	20	0.25	821.418	0.203079	5.20308	TRUE	FALSE	39	0	0
F:\25-03-2022\20220324-TEST BROTH-POS-00.d	2714	scanId=1554820		25.9135	670.324	740.037	2	1338.63	45	3290.3	R.AQIAETTSEFDK.E	AQIAETTSEFDK	WP_126659346.1 MULTISPECIES: chaperonin GroEL [Lysinibacillus]	349	360	0	1338.63	0.00270507	2.02077	5	22	0.227273	573.032	0.174158	5.17416	TRUE	FALSE	40	0	0
F:\25-03-2022\20220324-TEST BROTH-POS-00.d	3903	scanId=2251842		37.5306	469.806	1986.96	2	937.597	67	5365.96	R.VVIPIELR.R	VVIPIELR	WP_010857015.1 MULTISPECIES: AbrB/MazE/SpoVT family DNA-binding domain-containing protein [Lysinibacillus]	16	23	0	937.596	0.00106716	1.13818	5	14	0.357143	882.26	0.164418	5.16442	TRUE	FALSE	41	0	0
F:\25-03-2022\20220324-TEST BROTH-POS-00.d	3162	scanId=1819626		30.327	594.33	1464.92	2	1186.65	53	4050.13	R.LVGSIDEVVEK.A	LVGSIDEVVEK	WP_012292768.1 MULTISPECIES: F0F1 ATP synthase subunit beta [Lysinibacillus]	453	463	0	1186.64	0.0016793	1.41517	5	20	0.25	616.622	0.152247	5.15225	TRUE	FALSE	42	0	0
F:\25-03-2022\20220324-TEST BROTH-POS-00.d	2935	scanId=1684733		28.0787	766.89	617.377	2	1531.77	47	3327.45	R.ISGVPIVDSM(oxidation of M)ENQK.L	ISGVPIVDSMENQK	WP_012291837.1 MULTISPECIES: IMP dehydrogenase [Lysinibacillus]	120	133	0	1531.76	0.00990011	6.46324	5	26	0.192308	488.199	0.146719	5.14672	TRUE	FALSE	43	0	0
F:\25-03-2022\20220324-TEST BROTH-POS-00.d	3254	scanId=1874033		31.2338	638.844	696.77	2	1275.67	47	3226.28	R.ALALNQSEGFVK.L	ALALNQSEGFVK	WP_012293096.1 MULTISPECIES: dihydrolipoyl dehydrogenase [Lysinibacillus]	388	399	0	1275.68	-0.0082321	-6.45309	5	22	0.227273	446.611	0.138429	5.13843	TRUE	FALSE	44	0	0
F:\25-03-2022\20220324-TEST BROTH-POS-00.d	3548	scanId=2049391		34.1564	429.773	1548.72	2	857.531	55	3623.24	K.GLLISSIR.N	GLLISSIR	WP_012293094.1 MULTISPECIES: alpha-ketoacid dehydrogenase subunit beta [Lysinibacillus]	156	163	0	857.533	-0.00232501	-2.71128	5	14	0.357143	494.269	0.136416	5.13642	TRUE	FALSE	45	0	0
F:\25-03-2022\20220324-TEST BROTH-POS-00.d	3228	scanId=1858079		30.9678	638.847	1325.03	2	1275.68	52	3957.25	R.ALALNQSEGFVK.L	ALALNQSEGFVK	WP_012293096.1 MULTISPECIES: dihydrolipoyl dehydrogenase [Lysinibacillus]	388	399	0	1275.68	-0.00231113	-1.81168	5	22	0.227273	525.663	0.132836	5.13284	TRUE	FALSE	46	0	0
F:\25-03-2022\20220324-TEST BROTH-POS-00.d	3575	scanId=2066064		34.4343	515.801	1737.69	2	1029.59	60	4682.71	R.FAIDPVLQK.H	FAIDPVLQK	WP_031417987.1 MULTISPECIES: ubiquinol-cytochrome c reductase iron-sulfur subunit [Lysinibacillus]	34	42	0	1029.59	0.000717559	0.696939	5	16	0.3125	580.975	0.124068	5.12407	TRUE	FALSE	47	0	0
F:\25-03-2022\20220324-TEST BROTH-POS-00.d	1909	scanId=1076367		17.9393	509.773	1167.86	2	1017.53	57	4819.46	K.VGAATETELK.E	VGAATETELK	WP_126659346.1 MULTISPECIES: chaperonin GroEL [Lysinibacillus]	379	388	0	1017.53	-0.00295351	-2.90261	5	18	0.277778	596.06	0.123678	5.12368	TRUE	FALSE	48	0	0
F:\25-03-2022\20220324-TEST BROTH-POS-00.d	4493	scanId=2555733		42.5954	1061.55	1621.56	2	2121.09	158	12148	R.SVTGEYSPLTDISVQLREK.L	SVTGEYSPLTDISVQLREK	DECOY_WP_012291666.1 MULTISPECIES: DNA cytosine methyltransferase [Lysinibacillus]	407	425	1	2121.1	-0.0064639	-3.04743	5	36	0.138889	1405.83	0.115725	5.11572	FALSE	TRUE	48	1	1.99092
F:\25-03-2022\20220324-TEST BROTH-POS-00.d	2293	scanId=1306397		21.7732	437.237	1872.47	2	872.459	64	5276.44	R.VEEVELR.T	VEEVELR	WP_012293510.1 MULTISPECIES: 2,3-butanediol dehydrogenase [Lysinibacillus]	14	20	0	872.46	-0.00133356	-1.52851	5	12	0.416667	605.567	0.114768	5.11477	TRUE	FALSE	49	1	1.99092
F:\25-03-2022\20220324-TEST BROTH-POS-00.d	3632	scanId=2098026		34.967	703.356	1527.67	2	1404.7	64	4509.72	R.NEADQLVFQVDK.T	NEADQLVFQVDK	WP_012295327.1 MULTISPECIES: molecular chaperone DnaK [Lysinibacillus]	507	518	0	1404.69	0.00902702	6.42635	5	22	0.227273	499.271	0.11071	5.11071	TRUE	FALSE	50	1	1.99092
F:\25-03-2022\20220324-TEST BROTH-POS-00.d	4201	scanId=2408019		40.1335	772.931	2517.09	2	1543.85	109	6997.48	K.GVEAVIQEQFAIIK.K	GVEAVIQEQFAIIK	DECOY_WP_012293310.1 MULTISPECIES: polyribonucleotide nucleotidyltransferase [Lysinibacillus]	480	493	0	1543.86	-0.0142438	-9.22606	5	26	0.192308	755.65	0.107989	5.10799	FALSE	TRUE	50	2	3.55521
F:\25-03-2022\20220324-TEST BROTH-POS-00.d	3476	scanId=2005513		33.4251	505.766	1112.31	2	1009.52	58	4101.89	K.LFFTPEEK.L	LFFTPEEK	WP_012294163.1 MULTISPECIES: oleate hydratase [Lysinibacillus]	153	160	0	1009.51	0.00624326	6.18443	5	14	0.357143	442.846	0.107961	5.10796	TRUE	FALSE	51	2	3.55521
F:\25-03-2022\20220324-TEST BROTH-POS-00.d	5871	scanId=3329226		55.487	1014.08	980.959	2	2026.14	103	6123.31	R.VVLQDFTGVPVVVDLASLR.S	VVLQDFTGVPVVVDLASLR	WP_036161804.1 MULTISPECIES: aconitate hydratase AcnA [Lysinibacillus]	87	105	0	2026.15	-0.00949636	-4.68691	5	36	0.138889	622.136	0.101601	5.1016	TRUE	FALSE	52	2	3.55521
F:\25-03-2022\20220324-TEST BROTH-POS-00.d	3110	scanId=1787281		29.7879	531.301	966.401	2	1060.59	49	4072.38	K.VLFVGGENVK.V	VLFVGGENVK	WP_012295462.1 MULTISPECIES: 50S ribosomal protein L21 [Lysinibacillus]	38	47	0	1060.59	-0.00386483	-3.64403	5	18	0.277778	408.441	0.100295	5.1003	TRUE	FALSE	53	2	3.55521
F:\25-03-2022\20220324-TEST BROTH-POS-00.d	2995	scanId=1719521		28.6586	408.241	1488.99	2	814.468	57	5418.93	R.EIAEILK.I	EIAEILK	WP_206701081.1 MULTISPECIES: RNA polymerase sigma factor [Lysinibacillus]	127	133	0	814.48	-0.0118344	-14.53	5	12	0.416667	503.755	0.0929622	5.09296	TRUE	FALSE	54	2	3.55521
F:\25-03-2022\20220324-TEST BROTH-POS-00.d	4531	scanId=2574761		42.9126	758.437	1399.66	2	1514.86	62	4178.19	R.AKFDEITLPLVNR.T	AKFDEITLPLVNR	WP_012295327.1 MULTISPECIES: molecular chaperone DnaK [Lysinibacillus]	273	285	1	1514.85	0.0144078	9.51107	5	24	0.208333	384.897	0.0921206	5.09212	TRUE	FALSE	55	2	3.55521
F:\25-03-2022\20220324-TEST BROTH-POS-00.d	3670	scanId=2119075		35.3178	637.834	1265.39	2	1273.65	54	4953.11	K.VLPELNDEFAK.E	VLPELNDEFAK	WP_012295491.1 MULTISPECIES: trigger factor [Lysinibacillus]	247	257	0	1273.66	-0.00125529	-0.985577	5	20	0.25	453.607	0.0915801	5.09158	TRUE	FALSE	56	2	3.55521
F:\25-03-2022\20220324-TEST BROTH-POS-00.d	4031	scanId=2321175		38.6861	744.901	2792.02	2	1487.79	130	10587.5	K.IVETENKSQEALK.R	IVETENKSQEALK	DECOY_WP_036160608.1 MULTISPECIES: methyl-accepting chemotaxis protein [Lysinibacillus]	131	143	1	1487.78	0.00406141	2.72984	5	24	0.208333	954.55	0.0901582	5.09016	FALSE	TRUE	56	3	4.45727
F:\25-03-2022\20220324-TEST BROTH-POS-00.d	2707	scanId=1551054		25.8508	530.287	895.006	2	1058.56	56	4070.02	K.VDVGIQDVSK.M	VDVGIQDVSK	WP_012292923.1 MULTISPECIES: DUF4097 family beta strand repeat-containing protein [Lysinibacillus]	339	348	0	1058.56	-0.00162826	-1.53818	5	18	0.277778	344.725	0.0846986	5.0847	TRUE	FALSE	57	3	4.45727
F:\25-03-2022\20220324-TEST BROTH-POS-00.d	5072	scanId=2860732		47.6787	889.49	1203.94	2	1776.96	61	4079.98	K.IINFLQSEFGVNQIR.F	IINFLQSEFGVNQIR	WP_031418629.1 MULTISPECIES: NADP-dependent isocitrate dehydrogenase [Lysinibacillus]	164	178	0	1776.95	0.012346	6.94784	5	28	0.178571	337.198	0.0826468	5.08265	TRUE	FALSE	58	3	4.45727
F:\25-03-2022\20220324-TEST BROTH-POS-00.d	4406	scanId=2511260		41.8542	715.892	1919.84	2	1429.77	116	8280.16	R.AAELSDDELKVIK.G	AAELSDDELKVIK	WP_012296215.1 MULTISPECIES: redox-regulated ATPase YchF [Lysinibacillus]	180	192	1	1429.77	0.00356774	2.49533	5	24	0.208333	663.801	0.0801677	5.08017	TRUE	FALSE	59	3	4.45727
F:\25-03-2022\20220324-TEST BROTH-POS-00.d	2734	scanId=1567895		26.1315	670.323	786.182	2	1338.63	45	3102.89	R.AQIAETTSEFDK.E	AQIAETTSEFDK	WP_126659346.1 MULTISPECIES: chaperonin GroEL [Lysinibacillus]	349	360	0	1338.63	0.001406	1.05033	5	22	0.227273	238.46	0.076851	5.07685	TRUE	FALSE	60	3	4.45727
F:\25-03-2022\20220324-TEST BROTH-POS-00.d	3291	scanId=1895366		31.5893	707.894	819.256	2	1413.77	63	4559.37	R.QSVTNPNTIISIK.S	QSVTNPNTIISIK	WP_012295327.1 MULTISPECIES: molecular chaperone DnaK [Lysinibacillus]	56	68	0	1413.78	-0.00999799	-7.0718	5	24	0.208333	347.548	0.0762272	5.07623	TRUE	FALSE	61	3	4.45727
F:\25-03-2022\20220324-TEST BROTH-POS-00.d	5407	scanId=3059993		50.9997	721.927	1524.16	2	1441.84	81	5421.34	R.AVLELAGITDILSK.S	AVLELAGITDILSK	WP_008181711.1 MULTISPECIES: 30S ribosomal protein S5 [Lysinibacillus]	114	127	0	1441.84	0.000890583	0.617671	5	26	0.192308	393.964	0.072669	5.07267	TRUE	FALSE	62	3	4.45727
F:\25-03-2022\20220324-TEST BROTH-POS-00.d	4181	scanId=2398440		39.9739	737.906	2827.01	2	1473.8	129	10773.1	R.KRQTQAIGGIGSMK.E	KRQTQAIGGIGSMK	WP_031418922.1 MULTISPECIES: cell division protein FtsZ [Lysinibacillus]	142	155	2	1473.81	-0.0116089	-7.87679	5	26	0.192308	671.079	0.0622918	5.06229	TRUE	FALSE	63	3	4.45727
F:\25-03-2022\20220324-TEST BROTH-POS-00.d	2833	scanId=1626065		27.101	622.83	1330.31	2	1243.65	72	5178.72	K.GVNTAVVDISNR.A	GVNTAVVDISNR	WP_012293320.1 MULTISPECIES: BMP family protein [Lysinibacillus]	291	302	0	1243.65	-0.00667826	-5.36988	5	22	0.227273	306.167	0.0591201	5.05912	TRUE	FALSE	64	3	4.45727
F:\25-03-2022\20220324-TEST BROTH-POS-00.d	6075	scanId=3446690		57.4447	1373.17	705.556	2	2744.33	87	4769.73	K.EEIAQVAAISAADDEVGQLIAEAM(oxidation of M)ER.V	EEIAQVAAISAADDEVGQLIAEAMER	WP_068986766.1 MULTISPECIES: chaperonin GroEL [Lysinibacillus]	141	166	0	2744.32	0.00994724	3.62467	5	50	0.1	147.516	0.0309275	5.03093	TRUE	FALSE	65	3	4.45727
F:\25-03-2022\20220324-TEST BROTH-POS-00.d	1959	scanId=1105183		18.4196	407.229	1553.31	2	812.444	36	4118.79	R.ALEEPVR.Q	ALEEPVR	WP_126659346.1 MULTISPECIES: chaperonin GroEL [Lysinibacillus]	445	451	0	812.439	0.00485126	5.97123	4	12	0.333333	1072.86	0.26048	4.26048	TRUE	FALSE	66	3	4.45727
F:\25-03-2022\20220324-TEST BROTH-POS-00.d	2868	scanId=1645730		27.4287	387.244	1110.09	2	772.473	44	3720.9	K.ALISTLR.E	ALISTLR	WP_012293095.1 MULTISPECIES: 2-oxo acid dehydrogenase subunit E2 [Lysinibacillus]	278	284	0	772.481	-0.00751004	-9.72198	4	12	0.333333	737.955	0.198327	4.19833	TRUE	FALSE	67	3	4.45727
F:\25-03-2022\20220324-TEST BROTH-POS-00.d	2862	scanId=1642130		27.3687	487.277	1096.29	2	972.539	53	4898.17	R.EILTDRAR.L	EILTDRAR	DECOY_WP_025113851.1 MULTISPECIES: RNA polymerase sporulation sigma factor SigE [Lysinibacillus]	178	185	1	972.535	0.00379393	3.90107	4	14	0.285714	967.056	0.197432	4.19743	FALSE	TRUE	67	4	5.23925
F:\25-03-2022\20220324-TEST BROTH-POS-00.d	3505	scanId=2023738		33.7288	493.797	1871.66	2	985.579	45	3184.73	K.LTGGVEGLLK.G	LTGGVEGLLK	WP_012293096.1 MULTISPECIES: dihydrolipoyl dehydrogenase [Lysinibacillus]	99	108	0	985.581	-0.00150258	-1.52456	4	18	0.222222	608.764	0.191151	4.19115	TRUE	FALSE	68	4	5.23925
F:\25-03-2022\20220324-TEST BROTH-POS-00.d	3539	scanId=2043906		34.065	572.32	1519.86	2	1142.63	41	3148.38	R.LANISEDIIR.H	LANISEDIIR	WP_031415833.1 MULTISPECIES: 30S ribosomal protein S6 [Lysinibacillus]	78	87	0	1142.63	-0.0041792	-3.65753	4	18	0.222222	567.336	0.180199	4.1802	TRUE	FALSE	69	4	5.23925
F:\25-03-2022\20220324-TEST BROTH-POS-00.d	3836	scanId=2212519		36.8752	702.351	1311.44	2	1402.69	70	4739.17	-.MAESNLLC[carbamidomethylation of C]PIAGK.W	MAESNLLCPIAGK	DECOY_WP_012292014.1 MULTISPECIES: phosphoribosylformylglycinamidine synthase subunit PurL [Lysinibacillus]	1	13	0	1402.69	-0.0067091	-4.78301	4	24	0.166667	835.448	0.176286	4.17629	FALSE	TRUE	69	5	5.23925
F:\25-03-2022\20220324-TEST BROTH-POS-00.d	2091	scanId=1185241		19.7539	336.708	1845.62	2	671.401	62	5326.74	K.IGDIVR.I	IGDIVR	WP_008181723.1 MULTISPECIES: 30S ribosomal protein S17 [Lysinibacillus]	57	62	0	671.397	0.00437584	6.51752	4	10	0.4	922.794	0.173238	4.17324	TRUE	FALSE	70	5	5.23925
F:\25-03-2022\20220324-TEST BROTH-POS-00.d	2542	scanId=1454487		24.2413	387.726	3399.69	2	773.437	69	8714.6	K.SIEQAVK.A	SIEQAVK	WP_036161309.1 MULTISPECIES: ABC transporter permease/substrate-binding protein [Lysinibacillus]	362	368	0	773.428	0.00891002	11.5202	4	12	0.333333	1493.95	0.171431	4.17143	TRUE	FALSE	71	5	5.23925
F:\25-03-2022\20220324-TEST BROTH-POS-00.d	2134	scanId=1210778		20.1795	408.246	2250.39	2	814.477	45	4044.25	R.LVEVVEK.A	LVEVVEK	WP_008181723.1 MULTISPECIES: 30S ribosomal protein S17 [Lysinibacillus]	77	83	0	814.48	-0.00337164	-4.13962	4	12	0.333333	530.672	0.131216	4.13122	TRUE	FALSE	72	5	5.23925
F:\25-03-2022\20220324-TEST BROTH-POS-00.d	2674	scanId=1531384		25.5229	461.752	897.184	2	921.49	46	3597.49	R.LFIEGESK.T	LFIEGESK	WP_012292923.1 MULTISPECIES: DUF4097 family beta strand repeat-containing protein [Lysinibacillus]	372	379	0	921.481	0.00890913	9.66827	4	14	0.285714	469.49	0.130505	4.1305	TRUE	FALSE	73	5	5.23925
F:\25-03-2022\20220324-TEST BROTH-POS-00.d	2882	scanId=1653764		27.5626	599.823	934.803	2	1197.63	40	2267.16	R.GENIEVTPAIR.E	GENIEVTPAIR	WP_012292915.1 MULTISPECIES: ribosome-associated translation inhibitor RaiA [Lysinibacillus]	8	18	0	1197.64	-0.00301865	-2.52051	4	20	0.2	293.715	0.129552	4.12955	TRUE	FALSE	74	5	5.23925
F:\25-03-2022\20220324-TEST BROTH-POS-00.d	3077	scanId=1769716		29.4951	424.248	801.09	2	846.481	50	4320.46	K.LAINGFGR.I	LAINGFGR	WP_031417788.1 MULTISPECIES: type I glyceraldehyde-3-phosphate dehydrogenase [Lysinibacillus]	5	12	0	846.471	0.0102748	12.1384	4	14	0.285714	546.939	0.126593	4.12659	TRUE	FALSE	75	5	5.23925
F:\25-03-2022\20220324-TEST BROTH-POS-00.d	1899	scanId=1070216		17.8368	265.18	1212.56	2	528.346	46	4328.98	K.IGAIR.D	IGAIR	WP_036162343.1 MULTISPECIES: amidohydrolase family protein [Lysinibacillus]	312	316	0	528.338	0.00749637	14.1886	4	8	0.5	542.756	0.125377	4.12538	TRUE	FALSE	76	5	5.23925
F:\25-03-2022\20220324-TEST BROTH-POS-00.d	2932	scanId=1682848		28.0473	529.795	2417.7	2	1057.58	60	4482.94	R.LQQATDAAIK.Y	LQQATDAAIK	WP_012293081.1 MULTISPECIES: ribonuclease J1 [Lysinibacillus]	238	247	0	1057.58	-0.001415	-1.33796	4	18	0.222222	555.347	0.12388	4.12388	TRUE	FALSE	77	5	5.23925
F:\25-03-2022\20220324-TEST BROTH-POS-00.d	2279	scanId=1297641		21.6272	430.253	903.284	2	858.492	49	3746.04	K.VMIAGVAAK.M	VMIAGVAAK	WP_036127167.1 MULTISPECIES: Nif3-like dinuclear metal center hexameric protein [Lysinibacillus]	338	346	0	858.5	-0.00794715	-9.25703	4	16	0.25	440.498	0.11759	4.11759	TRUE	FALSE	78	5	5.23925
F:\25-03-2022\20220324-TEST BROTH-POS-00.d	2094	scanId=1186957		19.7825	581.767	1056.38	2	1161.52	45	3189.71	R.DEVSAEEVER.E	DEVSAEEVER	WP_012293292.1 MULTISPECIES: translation elongation factor Ts [Lysinibacillus]	196	205	0	1161.51	0.00431576	3.71563	4	18	0.222222	372.038	0.116637	4.11664	TRUE	FALSE	79	5	5.23925
F:\25-03-2022\20220324-TEST BROTH-POS-00.d	3230	scanId=1859463		30.9909	495.282	1173.44	2	988.549	68	4678.5	K.AEEISSLIK.Q	AEEISSLIK	WP_012292766.1 MULTISPECIES: F0F1 ATP synthase subunit alpha [Lysinibacillus]	5	13	0	988.544	0.00486417	4.92054	4	16	0.25	537.222	0.114828	4.11483	TRUE	FALSE	80	5	5.23925
F:\25-03-2022\20220324-TEST BROTH-POS-00.d	3335	scanId=1920851		32.014	428.783	775.248	2	855.552	56	4418.15	R.LGTLILAR.L	LGTLILAR	WP_012293257.1 MULTISPECIES: GTP-sensing pleiotropic transcriptional regulator CodY [Lysinibacillus]	123	130	0	855.554	-0.00253155	-2.95896	4	14	0.285714	504.963	0.114293	4.11429	TRUE	FALSE	81	5	5.23925
F:\25-03-2022\20220324-TEST BROTH-POS-00.d	3155	scanId=1815141		30.2522	658.843	973.179	2	1315.67	59	3879.02	K.ENTAVLEDIANK.I	ENTAVLEDIANK	WP_068983091.1 MULTISPECIES: recombinase RecA [Lysinibacillus]	309	320	0	1315.66	0.00963862	7.32606	4	22	0.181818	413.036	0.10648	4.10648	TRUE	FALSE	82	5	5.23925
F:\25-03-2022\20220324-TEST BROTH-POS-00.d	2119	scanId=1201859		20.0309	502.272	675.546	2	1002.53	45	3913.46	R.VLGEVTEEK.L	VLGEVTEEK	WP_012292001.1 MULTISPECIES: glutamine-hydrolyzing GMP synthase [Lysinibacillus]	417	425	0	1002.52	0.00602214	6.00698	4	16	0.25	413.324	0.105616	4.10562	TRUE	FALSE	83	5	5.23925
F:\25-03-2022\20220324-TEST BROTH-POS-00.d	3745	scanId=2161674		36.0278	649.379	1834.02	2	1296.74	77	6056.41	K.AISVPVGEVTLGR.V	AISVPVGEVTLGR	WP_012292768.1 MULTISPECIES: F0F1 ATP synthase subunit beta [Lysinibacillus]	80	92	0	1296.74	0.00244518	1.88563	4	24	0.166667	638.726	0.105463	4.10546	TRUE	FALSE	84	5	5.23925
F:\25-03-2022\20220324-TEST BROTH-POS-00.d	2594	scanId=1483406		24.7233	609.3	940.743	2	1216.59	38	2854.15	R.AGDDAAGLAISEK.M	AGDDAAGLAISEK	WP_155591959.1 MULTISPECIES: flagellin Hag [Lysinibacillus]	39	51	0	1216.59	-0.00849301	-6.98098	4	24	0.166667	291.088	0.101988	4.10199	TRUE	FALSE	85	5	5.23925
F:\25-03-2022\20220324-TEST BROTH-POS-00.d	1884	scanId=1061734		17.6954	479.766	612.654	2	957.517	40	2559.22	K.VAAEAIAGEK.S	VAAEAIAGEK	WP_012293096.1 MULTISPECIES: dihydrolipoyl dehydrogenase [Lysinibacillus]	331	340	0	957.513	0.00430675	4.49785	4	18	0.222222	241.578	0.0943952	4.0944	TRUE	FALSE	86	5	5.23925
F:\25-03-2022\20220324-TEST BROTH-POS-00.d	2864	scanId=1643514		27.3918	443.28	763.249	2	884.546	48	4081.67	K.LVGIITNR.D	LVGIITNR	WP_012291837.1 MULTISPECIES: IMP dehydrogenase [Lysinibacillus]	134	141	0	884.544	0.00125081	1.41407	4	14	0.285714	378.756	0.0927945	4.09279	TRUE	FALSE	87	5	5.23925
F:\25-03-2022\20220324-TEST BROTH-POS-00.d	4682	scanId=2650679		44.1778	664.386	1711.44	2	1326.76	105	7429.59	R.IIEAALQLISEK.G	IIEAALQLISEK	WP_051563217.1 MULTISPECIES: TetR/AcrR family transcriptional regulator [Lysinibacillus]	10	21	0	1326.78	-0.0174726	-13.1692	4	22	0.181818	666.637	0.0897273	4.08973	TRUE	FALSE	88	5	5.23925
F:\25-03-2022\20220324-TEST BROTH-POS-00.d	2440	scanId=1394930		23.2487	480.279	1201.26	2	958.544	58	4195.21	K.VSEVGTVIR.I	VSEVGTVIR	WP_012292766.1 MULTISPECIES: F0F1 ATP synthase subunit alpha [Lysinibacillus]	25	33	0	958.545	-0.00094233	-0.983084	4	16	0.25	374.853	0.0893525	4.08935	TRUE	FALSE	89	5	5.23925
F:\25-03-2022\20220324-TEST BROTH-POS-00.d	3239	scanId=1864782		31.0796	538.782	850.571	2	1075.55	49	3698.96	K.GFAVVAEEVR.K	GFAVVAEEVR	WP_231595752.1 MULTISPECIES: methyl-accepting chemotaxis protein [Lysinibacillus]	145	154	0	1075.57	-0.017369	-16.1487	4	18	0.222222	320.045	0.0865229	4.08652	TRUE	FALSE	90	5	5.23925
F:\25-03-2022\20220324-TEST BROTH-POS-00.d	2872	scanId=1647780		27.4629	695.366	609.334	2	1388.72	54	2855.95	R.EINTLFQFYSK.Q	EINTLFQFYSK	WP_036160791.1 MULTISPECIES: tyrosine-type recombinase/integrase [Lysinibacillus]	208	218	0	1388.7	0.0202829	14.6057	4	20	0.2	243.458	0.085246	4.08525	TRUE	FALSE	91	5	5.23925
F:\25-03-2022\20220324-TEST BROTH-POS-00.d	1428	scanId=788690		13.1447	466.246	662.429	2	930.477	44	3552.39	K.AQSDALAAGK.I	AQSDALAAGK	WP_031418629.1 MULTISPECIES: NADP-dependent isocitrate dehydrogenase [Lysinibacillus]	267	276	0	930.477	-0.000124948	-0.134283	4	18	0.222222	301.87	0.0849765	4.08498	TRUE	FALSE	92	5	5.23925
F:\25-03-2022\20220324-TEST BROTH-POS-00.d	2876	scanId=1650548		27.509	727.407	1174.01	2	1452.8	64	4565.82	K.IAVAGQTGNLVPADK.K	IAVAGQTGNLVPADK	WP_012293408.1 MULTISPECIES: thymidine phosphorylase [Lysinibacillus]	148	162	0	1452.79	0.00502891	3.46154	4	28	0.142857	380.466	0.0833291	4.08333	TRUE	FALSE	93	5	5.23925
F:\25-03-2022\20220324-TEST BROTH-POS-00.d	1876	scanId=1056967		17.616	386.732	686.521	2	771.45	52	3923.9	K.LAELQAK.L	LAELQAK	WP_012295328.1 nucleotide exchange factor GrpE [Lysinibacillus fusiformis]	50	56	0	771.449	0.00117077	1.51763	4	12	0.333333	325.043	0.0828366	4.08284	TRUE	FALSE	94	5	5.23925
F:\25-03-2022\20220324-TEST BROTH-POS-00.d	5197	scanId=2935814		48.9301	729.897	897.793	2	1457.78	69	4499.42	R.VLGLQGM(oxidation of M)INEQIK.G	VLGLQGMINEQIK	WP_012292731.1 MULTISPECIES: methylmalonyl-CoA mutase family protein [Lysinibacillus]	129	141	0	1457.79	-0.0120698	-8.27953	4	24	0.166667	368.704	0.0819448	4.08194	TRUE	FALSE	95	5	5.23925
F:\25-03-2022\20220324-TEST BROTH-POS-00.d	4888	scanId=2758885		45.9813	771.426	8385.9	2	1540.84	174	18417.3	R.RKGDAPSLEWAGVR.D	RKGDAPSLEWAGVR	DECOY_WP_012293342.1 MULTISPECIES: 2-oxoacid:acceptor oxidoreductase subunit alpha [Lysinibacillus]	384	397	2	1540.81	0.0271733	17.6357	4	26	0.153846	1409.62	0.0765379	4.07654	FALSE	TRUE	95	6	6.09464
F:\25-03-2022\20220324-TEST BROTH-POS-00.d	2186	scanId=1242185		20.703	351.706	2063.68	2	701.397	51	4086.51	R.VELDVK.V	VELDVK	WP_024363933.1 MULTISPECIES: co-chaperone GroES [Lysinibacillus]	54	59	0	701.396	0.00127725	1.82102	4	10	0.4	311.334	0.0761859	4.07619	TRUE	FALSE	96	6	6.09464
F:\25-03-2022\20220324-TEST BROTH-POS-00.d	4034	scanId=2322174		38.7028	586.81	1657.33	2	1171.61	70	5326.7	K.NIEWVENIR.R	NIEWVENIR	WP_012295584.1 MULTISPECIES: FAD-binding oxidoreductase [Lysinibacillus]	388	396	0	1171.6	0.00664619	5.67275	4	16	0.25	403.229	0.0756996	4.0757	TRUE	FALSE	97	6	6.09464
F:\25-03-2022\20220324-TEST BROTH-POS-00.d	3658	scanId=2112040		35.2005	612.84	1898.98	2	1223.67	73	5298.62	R.FQLADIPPAPR.G	FQLADIPPAPR	WP_012295327.1 MULTISPECIES: molecular chaperone DnaK [Lysinibacillus]	427	437	0	1223.67	0.000126812	0.103633	4	20	0.2	399.874	0.0754674	4.07547	TRUE	FALSE	98	6	6.09464
F:\25-03-2022\20220324-TEST BROTH-POS-00.d	3758	scanId=2169042		36.1506	1266.15	1853.37	2	2530.28	103	5989.33	K.FREEVDNLQVDLEKIEDGVQR.M	FREEVDNLQVDLEKIEDGVQR	DECOY_WP_048390985.1 MULTISPECIES: serine--tRNA ligase [Lysinibacillus]	331	351	2	2530.27	0.0125731	4.96907	4	40	0.1	445.778	0.0744287	4.07443	FALSE	TRUE	98	7	7.11041
F:\25-03-2022\20220324-TEST BROTH-POS-00.d	2818	scanId=1616260		26.9375	473.74	2322.51	2	945.465	74	6731.82	K.EQDNTVIK.E	EQDNTVIK	DECOY_WP_012294174.1 MULTISPECIES: hypothetical protein [Lysinibacillus]	436	443	0	945.477	-0.011422	-12.0807	4	14	0.285714	435.468	0.0646879	4.06469	FALSE	TRUE	98	8	8.12619
F:\25-03-2022\20220324-TEST BROTH-POS-00.d	3732	scanId=2154693		35.9114	1266.15	669.72	2	2530.29	62	3104.1	K.FREEVDNLQVDLEKIEDGVQR.M	FREEVDNLQVDLEKIEDGVQR	DECOY_WP_048390985.1 MULTISPECIES: serine--tRNA ligase [Lysinibacillus]	331	351	2	2530.27	0.0228275	9.02179	4	40	0.1	196.244	0.0632209	4.06322	FALSE	TRUE	98	9	8.61454
F:\25-03-2022\20220324-TEST BROTH-POS-00.d	4423	scanId=2520627		42.0103	493.78	1410.29	2	985.546	86	7043.37	R.GNELKRNR.V	GNELKRNR	WP_012293240.1 MULTISPECIES: chromosome segregation protein SMC [Lysinibacillus]	927	934	2	985.542	0.00438547	4.4498	4	14	0.285714	444.441	0.0631006	4.0631	TRUE	FALSE	99	9	8.61454
F:\25-03-2022\20220324-TEST BROTH-POS-00.d	5102	scanId=2878403		47.9733	1193.13	1036.05	2	2384.24	60	3057.74	K.MDPTRFQIADISKTHTDPLAK.I	MDPTRFQIADISKTHTDPLAK	WP_031419256.1 MULTISPECIES: tRNA threonylcarbamoyladenosine dehydratase [Lysinibacillus]	151	171	2	2384.22	0.0289842	12.1567	4	40	0.1	187.647	0.061368	4.06137	TRUE	FALSE	100	9	8.61454
F:\25-03-2022\20220324-TEST BROTH-POS-00.d	2960	scanId=1698415		28.3068	428.78	1517.87	2	855.545	55	5020.36	K.LVRVIEK.R	LVRVIEK	WP_012292228.1 MULTISPECIES: bifunctional phosphoribosyl-AMP cyclohydrolase/phosphoribosyl-ATP diphosphatase HisIE [Lysinibacillus]	118	124	1	855.554	-0.00936305	-10.9438	4	12	0.333333	307.027	0.0611564	4.06116	TRUE	FALSE	101	9	8.61454
F:\25-03-2022\20220324-TEST BROTH-POS-00.d	5657	scanId=3206760		53.4459	759.408	1677.41	2	1516.8	76	4975.56	K.KGDVYDALKSFFK.K	KGDVYDALKSFFK	WP_012292052.1 MULTISPECIES: sporulation protein YhbH [Lysinibacillus]	369	381	2	1516.79	0.00877094	5.78255	4	24	0.166667	298.874	0.0600684	4.06007	TRUE	FALSE	102	9	8.61454
F:\25-03-2022\20220324-TEST BROTH-POS-00.d	3170	scanId=1824445		30.4073	440.236	1064.45	2	878.458	40	2967.04	R.ESDFILR.E	ESDFILR	WP_012292001.1 MULTISPECIES: glutamine-hydrolyzing GMP synthase [Lysinibacillus]	431	437	0	878.45	0.00813299	9.25834	4	12	0.333333	174.902	0.0589485	4.05895	TRUE	FALSE	103	9	8.61454
F:\25-03-2022\20220324-TEST BROTH-POS-00.d	3123	scanId=1795200		29.9199	674.34	1075.29	2	1346.66	66	4448.94	K.RYYDKFVDNK.-	RYYDKFVDNK	WP_036161427.1 MULTISPECIES: N-acetylmuramoyl-L-alanine amidase [Lysinibacillus]	250	259	2	1346.66	0.00300291	2.22989	4	18	0.222222	247.872	0.0557148	4.05571	TRUE	FALSE	104	9	8.61454
F:\25-03-2022\20220324-TEST BROTH-POS-00.d	5286	scanId=2987785		49.7963	1272.12	1120.03	2	2542.23	131	9780.85	K.RTYSHETSAEIIYC[carbamidomethylation of C]YAWHKK.T	RTYSHETSAEIIYCYAWHKK	DECOY_WP_051563204.1 MULTISPECIES: S-layer homology domain-containing protein [Lysinibacillus]	11	30	2	2542.21	0.0237075	9.32554	4	38	0.105263	524.705	0.0536462	4.05365	FALSE	TRUE	104	10	9.57171
F:\25-03-2022\20220324-TEST BROTH-POS-00.d	3585	scanId=2071882		34.5312	736.412	3026.4	2	1470.81	124	9654.94	K.ATLM(oxidation of M)IIPVHWFK.R	ATLMIIPVHWFK	DECOY_WP_036160392.1 MULTISPECIES: response regulator transcription factor [Lysinibacillus]	151	162	0	1470.81	0.00367031	2.49544	4	22	0.181818	505.34	0.0523401	4.05234	FALSE	TRUE	104	11	10.4286
F:\25-03-2022\20220324-TEST BROTH-POS-00.d	2137	scanId=1212494		20.2081	385.743	1612.11	2	769.471	50	4389.9	K.AILSAPAK.G	AILSAPAK	WP_031417788.1 MULTISPECIES: type I glyceraldehyde-3-phosphate dehydrogenase [Lysinibacillus]	117	124	0	769.47	0.000889865	1.15647	4	14	0.285714	209.314	0.0476809	4.04768	TRUE	FALSE	105	11	10.4286
F:\25-03-2022\20220324-TEST BROTH-POS-00.d	6744	scanId=3830367		63.8393	743.43	2021.33	2	1484.85	172	13813.6	R.LNDILSLIEISQK.I	LNDILSLIEISQK	DECOY_WP_139015353.1 MULTISPECIES: methyltransferase domain-containing protein [Lysinibacillus]	194	206	0	1484.85	0.000728623	0.490706	4	24	0.166667	643.725	0.0466009	4.0466	FALSE	TRUE	105	12	11.3767
F:\25-03-2022\20220324-TEST BROTH-POS-00.d	4914	scanId=2773319		46.2219	771.426	2695.85	2	1540.84	120	8519.97	R.DNANALLQDLLITK.A	DNANALLQDLLITK	DECOY_WP_012295513.1 MULTISPECIES: DinB family protein [Lysinibacillus]	138	151	0	1540.85	-0.00856717	-5.56004	4	26	0.153846	386.81	0.0454004	4.0454	FALSE	TRUE	105	13	12.0943
F:\25-03-2022\20220324-TEST BROTH-POS-00.d	3980	scanId=2293096		38.2181	750.416	2190.96	2	1498.82	89	7628.56	K.EKLEGVLQPLVM(oxidation of M)K.V	EKLEGVLQPLVMK	WP_012295327.1 MULTISPECIES: molecular chaperone DnaK [Lysinibacillus]	559	571	1	1498.84	-0.0260832	-17.4023	4	24	0.166667	334.435	0.0438399	4.04384	TRUE	FALSE	106	13	12.0943
F:\25-03-2022\20220324-TEST BROTH-POS-00.d	6414	scanId=3639679		60.6612	1056.57	1008.69	2	2111.12	123	6876.33	R.GPIWSMKARPKDLNTQNR.W	GPIWSMKARPKDLNTQNR	WP_051563234.1 MULTISPECIES: spore germination protein [Lysinibacillus]	471	488	2	2111.11	0.0179681	8.51122	4	34	0.117647	288.497	0.041955	4.04196	TRUE	FALSE	107	13	12.0943
F:\25-03-2022\20220324-TEST BROTH-POS-00.d	3302	scanId=1901683		31.6946	535.33	1643.66	2	1068.65	91	8793.82	R.TPLTLHFLK.A	TPLTLHFLK	DECOY_WP_012293667.1 MULTISPECIES: pantoate--beta-alanine ligase [Lysinibacillus]	144	152	0	1068.63	0.0122626	11.475	4	16	0.25	355.279	0.040401	4.0404	FALSE	TRUE	107	14	13.0247
F:\25-03-2022\20220324-TEST BROTH-POS-00.d	5391	scanId=3050242		50.8372	1227.62	1140.01	2	2453.23	102	6627.61	R.LNKSYGPNFGRSTGSSLNLSNLK.S	LNKSYGPNFGRSTGSSLNLSNLK	DECOY_WP_012292272.1 MULTISPECIES: DUF87 domain-containing protein [Lysinibacillus]	254	276	2	2453.27	-0.0314962	-12.8385	4	44	0.0909091	261.392	0.0394399	4.03944	FALSE	TRUE	107	15	13.5744
F:\25-03-2022\20220324-TEST BROTH-POS-00.d	3556	scanId=2054545		34.2423	694.395	4932.59	2	1386.77	101	8099.94	K.IGAWLANKRSSGK.I	IGAWLANKRSSGK	WP_036161220.1 MULTISPECIES: asparagine--tRNA ligase [Lysinibacillus]	19	31	2	1386.77	0.00145645	1.05024	4	24	0.166667	319.417	0.0394345	4.03943	TRUE	FALSE	108	15	13.5744
F:\25-03-2022\20220324-TEST BROTH-POS-00.d	6775	scanId=3847611		64.1267	1317.14	1003.11	2	2632.27	130	8041.54	R.YISSTGTAISVGKNNKQNDM(oxidation of M)LTFK.I	YISSTGTAISVGKNNKQNDMLTFK	WP_036162599.1 MULTISPECIES: fibronectin-binding domain-containing protein [Lysinibacillus]	446	469	2	2632.32	-0.0421755	-16.0222	4	46	0.0869565	306.041	0.0380575	4.03806	TRUE	FALSE	109	15	13.5744
F:\25-03-2022\20220324-TEST BROTH-POS-00.d	3595	scanId=2077531		34.6254	725.863	1003.26	2	1449.71	73	5174.17	K.LSDEELVELM(oxidation of M)TR.M	LSDEELVELMTR	WP_012293093.1 MULTISPECIES: pyruvate dehydrogenase (acetyl-transferring) E1 component subunit alpha [Lysinibacillus]	43	54	0	1449.7	0.00913081	6.29841	4	22	0.181818	185.216	0.0357963	4.0358	TRUE	FALSE	110	15	13.5744
F:\25-03-2022\20220324-TEST BROTH-POS-00.d	4257	scanId=2438205		40.6366	927.017	1099.52	2	1852.02	84	5324.11	K.IQASGGVRSVSLGANIAPR.V	IQASGGVRSVSLGANIAPR	DECOY_WP_012292766.1 MULTISPECIES: F0F1 ATP synthase subunit alpha [Lysinibacillus]	132	150	1	1852.03	-0.00902011	-4.8704	4	36	0.111111	169.168	0.0317741	4.03177	FALSE	TRUE	110	16	14.4794
F:\25-03-2022\20220324-TEST BROTH-POS-00.d	4795	scanId=2709795		45.1631	772.91	1786.01	2	1543.81	113	7711.74	K.VDIIGEIMELEQR.K	VDIIGEIMELEQR	DECOY_WP_012295972.1 MULTISPECIES: MerR family transcriptional regulator [Lysinibacillus]	168	180	0	1543.79	0.0143291	9.28174	4	24	0.166667	215.545	0.0279503	4.02795	FALSE	TRUE	110	17	15.2458
F:\25-03-2022\20220324-TEST BROTH-POS-00.d	3780	scanId=2181006		36.35	329.188	6405.42	2	656.362	89	10250	K.SPANLR.L	SPANLR	WP_206700948.1 MULTISPECIES: tRNA (guanosine(46)-N7)-methyltransferase TrmB [Lysinibacillus]	76	81	0	656.361	0.00117132	1.78456	4	10	0.4	284.52	0.027758	4.02776	TRUE	FALSE	111	17	15.2458
F:\25-03-2022\20220324-TEST BROTH-POS-00.d	6739	scanId=3827484		63.7913	1342.22	1779.39	2	2682.42	170	9064.37	K.NNLVDLQFC[carbamidomethylation of C]EIHADKLREIIDK.E	NNLVDLQFCEIHADKLREIIDK	DECOY_WP_012291893.1 MULTISPECIES: SpoIIE family protein phosphatase [Lysinibacillus]	299	320	2	2682.38	0.0369042	13.758	4	42	0.0952381	172.463	0.0190264	4.01903	FALSE	TRUE	111	18	15.9984
F:\25-03-2022\20220324-TEST BROTH-POS-00.d	6397	scanId=3630198		60.5032	1206.11	1188.68	2	2410.2	145	7928.38	K.IIDENTIVLIKGDM(oxidation of M)YSEQVSK.L	IIDENTIVLIKGDMYSEQVSK	WP_012293956.1 MULTISPECIES: Mur ligase family protein [Lysinibacillus]	430	450	1	2410.23	-0.0253585	-10.5212	4	40	0.1	117.532	0.0148242	4.01482	TRUE	FALSE	112	18	15.9984
F:\25-03-2022\20220324-TEST BROTH-POS-00.d	4852	scanId=2740462		45.6742	740.926	5314.74	2	1479.84	133	10010.3	K.KDVFVYPLKDTR.S	KDVFVYPLKDTR	DECOY_WP_036160791.1 MULTISPECIES: tyrosine-type recombinase/integrase [Lysinibacillus]	82	93	2	1479.81	0.0285551	19.2965	4	22	0.181818	140.722	0.0140578	4.01406	FALSE	TRUE	112	19	16.8872
F:\25-03-2022\20220324-TEST BROTH-POS-00.d	4725	scanId=2673332		44.5554	650.397	10922.9	2	1298.78	211	19693.6	R.GSLIKNVNITIK.S	GSLIKNVNITIK	DECOY_WP_227256835.1 MULTISPECIES: Ger(x)C family spore germination protein [Lysinibacillus]	12	23	1	1298.79	-0.0125955	-9.69785	4	22	0.181818	157.436	0.00799427	4.00799	FALSE	TRUE	112	20	17.6187
F:\25-03-2022\20220324-TEST BROTH-POS-00.d	6403	scanId=3633580		60.5595	735.441	1907.16	2	1468.87	331	33311.9	K.AALPVM(oxidation of M)EGKAILLK.R	AALPVMEGKAILLK	WP_036161253.1 MULTISPECIES: malate dehydrogenase [Lysinibacillus]	83	96	1	1468.87	-0.00124484	-0.847482	4	26	0.153846	210.364	0.006315	4.00631	TRUE	FALSE	113	20	17.6187
F:\25-03-2022\20220324-TEST BROTH-POS-00.d	3169	scanId=1824112		30.4017	472.277	2317.33	2	942.54	113	150454	K.DRVLEAIK.E	DRVLEAIK	DECOY_WP_012291833.1 MULTISPECIES: DNA gyrase subunit A [Lysinibacillus]	540	547	1	942.55	-0.00972722	-10.3201	4	14	0.285714	578.723	0.00384651	4.00385	FALSE	TRUE	113	21	18.3374
F:\25-03-2022\20220324-TEST BROTH-POS-00.d	6302	scanId=3576122		59.6019	671.924	10842.4	2	1341.83	353	44135.9	K.LIIHADLIHGLK.T	LIIHADLIHGLK	WP_054611963.1 MULTISPECIES: glycerol-3-phosphate responsive antiterminator [Lysinibacillus]	53	64	0	1341.81	0.0192062	14.3136	4	22	0.181818	112.263	0.00254356	4.00254	TRUE	FALSE	114	21	18.3374
F:\25-03-2022\20220324-TEST BROTH-POS-00.d	2845	scanId=1632380		27.2062	402.229	3938.5	2	802.444	58	4772.83	R.VSEDLLK.N	VSEDLLK	DECOY_WP_012293748.1 MULTISPECIES: DEAD/DEAH box helicase [Lysinibacillus]	432	438	0	802.444	6.09289e-05	0.0759291	3	12	0.25	914.756	0.191659	3.19166	FALSE	TRUE	114	22	18.8794
F:\25-03-2022\20220324-TEST BROTH-POS-00.d	2112	scanId=1197760		19.9625	701.351	712.578	2	1400.69	27	1599.32	K.LLDQSNTEADPAK.R	LLDQSNTEADPAK	WP_012293201.1 MULTISPECIES: peptide ABC transporter substrate-binding protein [Lysinibacillus]	486	498	0	1400.68	0.00917678	6.55167	3	24	0.125	267.882	0.167498	3.1675	TRUE	FALSE	115	22	18.8794
F:\25-03-2022\20220324-TEST BROTH-POS-00.d	2628	scanId=1504347		25.0723	421.76	2372.17	2	841.505	56	4417.65	R.VAIAGARGK.M	VAIAGARGK	WP_031417990.1 MULTISPECIES: 4-hydroxy-tetrahydrodipicolinate reductase [Lysinibacillus]	5	13	1	841.513	-0.00852806	-10.1342	3	16	0.1875	732.921	0.165908	3.16591	TRUE	FALSE	116	22	18.8794
F:\25-03-2022\20220324-TEST BROTH-POS-00.d	2548	scanId=1458029		24.3004	387.225	13527.1	2	772.436	63	7677.14	R.IGDDIIK.A	IGDDIIK	DECOY_WP_232901024.1 MULTISPECIES: ABC transporter ATP-binding protein/permease [Lysinibacillus]	531	537	0	772.433	0.00297862	3.85615	3	12	0.25	1270.01	0.165428	3.16543	FALSE	TRUE	116	23	19.2399
F:\25-03-2022\20220324-TEST BROTH-POS-00.d	2851	scanId=1635981		27.2662	506.789	1820.09	2	1011.56	56	5630.58	K.IIEYIYAK.M	IIEYIYAK	WP_012292541.1 MULTISPECIES: M20/M25/M40 family metallo-hydrolase [Lysinibacillus]	36	43	0	1011.56	-0.00114095	-1.12791	3	14	0.214286	885.45	0.157257	3.15726	TRUE	FALSE	117	23	19.2399
F:\25-03-2022\20220324-TEST BROTH-POS-00.d	1518	scanId=843943		14.0656	379.73	1501.15	2	757.445	49	3341.55	K.VVAVGTGR.V	VVAVGTGR	WP_024363933.1 MULTISPECIES: co-chaperone GroES [Lysinibacillus]	39	46	0	757.445	6.52247e-05	0.0861115	3	14	0.214286	521.086	0.155941	3.15594	TRUE	FALSE	118	23	19.2399
F:\25-03-2022\20220324-TEST BROTH-POS-00.d	2286	scanId=1302295		21.7048	450.766	1888.93	2	899.518	54	4198.92	R.ARLARDAK.V	ARLARDAK	WP_012292330.1 MULTISPECIES: Fe-S cluster assembly protein SufD [Lysinibacillus]	249	256	2	899.53	-0.0123613	-13.7419	3	14	0.214286	615.072	0.146483	3.14648	TRUE	FALSE	119	23	19.2399
F:\25-03-2022\20220324-TEST BROTH-POS-00.d	3408	scanId=1964234		32.7371	547.276	1165.71	2	1092.54	52	4246.81	K.GAGVLYAEDAK.F	GAGVLYAEDAK	DECOY_WP_090001958.1 MULTISPECIES: pyruvate carboxylase [Lysinibacillus]	1090	1100	0	1092.55	-0.00728708	-6.66982	3	20	0.15	613.863	0.144547	3.14455	FALSE	TRUE	119	24	19.7446
F:\25-03-2022\20220324-TEST BROTH-POS-00.d	2237	scanId=1273040		21.2172	517.762	769.053	2	1033.51	35	3189.97	K.TLRELC[carbamidomethylation of C]DK.K	TLRELCDK	WP_036161669.1 MULTISPECIES: DNA helicase RecQ [Lysinibacillus]	545	552	1	1033.52	-0.0128413	-12.4248	3	14	0.214286	432.937	0.135718	3.13572	TRUE	FALSE	120	24	19.7446
F:\25-03-2022\20220324-TEST BROTH-POS-00.d	2638	scanId=1510549		25.1757	597.807	840.402	2	1193.6	50	4075.41	R.LEKSAEDKM(oxidation of M)K.K	LEKSAEDKMK	WP_012295993.1 MULTISPECIES: ABC-F type ribosomal protection protein [Lysinibacillus]	208	217	2	1193.6	0.003117	2.61144	3	18	0.166667	545.359	0.133817	3.13382	TRUE	FALSE	121	24	19.7446
F:\25-03-2022\20220324-TEST BROTH-POS-00.d	1493	scanId=828149		13.8024	322.691	1690.28	2	643.368	45	3802.42	K.LLDAGR.I	LLDAGR	DECOY_WP_012296222.1 MULTISPECIES: tRNA uridine-5-carboxymethylaminomethyl(34) synthesis enzyme MnmG [Lysinibacillus]	117	122	0	643.365	0.00299879	4.6611	3	10	0.3	506.817	0.133288	3.13329	FALSE	TRUE	121	25	20.3987
F:\25-03-2022\20220324-TEST BROTH-POS-00.d	2029	scanId=1147565		19.1259	583.289	485.532	2	1164.56	31	2316.9	R.LADTM(oxidation of M)TAIGEK.L	LADTMTAIGEK	WP_012293408.1 MULTISPECIES: thymidine phosphorylase [Lysinibacillus]	217	227	0	1164.57	-0.00701807	-6.02632	3	20	0.15	308.6	0.133195	3.1332	TRUE	FALSE	122	25	20.3987
F:\25-03-2022\20220324-TEST BROTH-POS-00.d	2891	scanId=1659081		27.6512	543.796	915.027	2	1085.58	63	5374.22	K.GGISGADAIVAR.Y	GGISGADAIVAR	DECOY_WP_012293299.1 MULTISPECIES: proline--tRNA ligase [Lysinibacillus]	366	377	0	1085.58	-0.00549511	-5.0619	3	22	0.136364	715.505	0.133136	3.13314	FALSE	TRUE	122	26	21.0422
F:\25-03-2022\20220324-TEST BROTH-POS-00.d	894	scanId=485830		8.09703	588.829	307.019	2	1175.64	27	1429.27	R.NFGRIAAQTAK.Q	NFGRIAAQTAK	WP_012293302.1 MULTISPECIES: transcription termination factor NusA [Lysinibacillus]	101	111	1	1175.64	0.00219182	1.86436	3	20	0.15	186.158	0.130247	3.13025	TRUE	FALSE	123	26	21.0422
F:\25-03-2022\20220324-TEST BROTH-POS-00.d	2431	scanId=1389445		23.1573	351.722	1215.97	2	701.43	43	3452.89	R.DILTLK.G	DILTLK	DECOY_WP_036162808.1 MULTISPECIES: thiazole biosynthesis adenylyltransferase ThiF [Lysinibacillus]	285	290	0	701.432	-0.00246018	-3.50736	3	10	0.3	442.449	0.128139	3.12814	FALSE	TRUE	123	27	21.6753
F:\25-03-2022\20220324-TEST BROTH-POS-00.d	2042	scanId=1155819		19.2635	366.223	886.011	2	730.431	45	3409.09	R.TLGIAEK.D	TLGIAEK	WP_010857015.1 MULTISPECIES: AbrB/MazE/SpoVT family DNA-binding domain-containing protein [Lysinibacillus]	25	31	0	730.423	0.0082472	11.291	3	12	0.25	420.742	0.123418	3.12342	TRUE	FALSE	124	27	21.6753
F:\25-03-2022\20220324-TEST BROTH-POS-00.d	1226	scanId=672845		11.214	258.17	2813.02	2	514.326	51	5576.99	K.LQVR.T	LQVR	DECOY_WP_180276576.1 MULTISPECIES: RNA-binding transcriptional accessory protein [Lysinibacillus]	197	200	0	514.323	0.00356483	6.93112	3	6	0.5	643.71	0.115423	3.11542	FALSE	TRUE	124	28	22.2983
F:\25-03-2022\20220324-TEST BROTH-POS-00.d	3498	scanId=2019084		33.6513	642.878	1788.89	2	1283.74	88	6685.77	K.VNGIVVRELGTK.V	VNGIVVRELGTK	WP_012293418.1 MULTISPECIES: rRNA pseudouridine synthase [Lysinibacillus]	30	41	1	1283.76	-0.0140841	-10.971	3	22	0.136364	743.138	0.111152	3.11115	TRUE	FALSE	125	28	22.2983
F:\25-03-2022\20220324-TEST BROTH-POS-00.d	3740	scanId=2159125		35.9853	513.298	770.903	2	1024.58	52	5361.4	R.KKGLNFYR.S	KKGLNFYR	DECOY_WP_012295265.1 MULTISPECIES: replication-relaxation family protein [Lysinibacillus]	165	172	2	1024.58	0.00040007	0.390471	3	14	0.214286	542.803	0.101243	3.10124	FALSE	TRUE	125	29	22.3785
F:\25-03-2022\20220324-TEST BROTH-POS-00.d	2744	scanId=1572826		26.2136	408.239	1275.46	2	814.463	55	4798.36	R.ELIIGDR.Q	ELIIGDR	WP_012292766.1 MULTISPECIES: F0F1 ATP synthase subunit alpha [Lysinibacillus]	165	171	0	814.455	0.00803609	9.86683	3	12	0.25	482.416	0.100538	3.10054	TRUE	FALSE	126	29	22.3785
F:\25-03-2022\20220324-TEST BROTH-POS-00.d	2501	scanId=1430720		23.8452	417.742	881.02	2	833.469	33	2811.52	K.ILMATSAK.E	ILMATSAK	WP_217581625.1 MULTISPECIES: sensor histidine kinase [Lysinibacillus]	298	305	0	833.468	0.00113027	1.35611	3	14	0.214286	275.425	0.0979631	3.09796	TRUE	FALSE	127	29	22.3785
F:\25-03-2022\20220324-TEST BROTH-POS-00.d	3114	scanId=1790049		29.834	576.296	863.738	2	1150.58	65	5019.66	K.VVVNYSGSQAK.A	VVVNYSGSQAK	WP_012293236.1 MULTISPECIES: 3-oxoacyl-[acyl-carrier-protein] reductase [Lysinibacillus]	33	43	0	1150.6	-0.0200223	-17.4017	3	20	0.15	488.632	0.0973437	3.09734	TRUE	FALSE	128	29	22.3785
F:\25-03-2022\20220324-TEST BROTH-POS-00.d	1368	scanId=754162		12.5692	347.679	1067.08	2	693.343	48	4062.35	K.EKFDR.M	EKFDR	WP_229388753.1 MULTISPECIES: ribosome biogenesis GTPase YlqF [Lysinibacillus]	106	110	1	693.345	-0.00110476	-1.59337	3	8	0.375	394.505	0.0971126	3.09711	TRUE	FALSE	129	29	22.3785
F:\25-03-2022\20220324-TEST BROTH-POS-00.d	3580	scanId=2068614		34.4768	612.365	1072.66	2	1222.72	55	4054.34	K.QQEIINLPLR.M	QQEIINLPLR	DECOY_WP_012292715.1 MULTISPECIES: DUF1934 domain-containing protein [Lysinibacillus]	59	68	0	1222.7	0.0124038	10.1446	3	18	0.166667	389.226	0.0960023	3.096	FALSE	TRUE	129	30	23.1502
F:\25-03-2022\20220324-TEST BROTH-POS-00.d	2081	scanId=1178871		19.6477	337.696	1028.79	2	673.378	50	4414.02	R.IGDLTR.T	IGDLTR	DECOY_WP_012293721.1 MULTISPECIES: copper amine oxidase N-terminal domain-containing protein [Lysinibacillus]	304	309	0	673.376	0.00180747	2.68419	3	10	0.3	420.958	0.0953683	3.09537	FALSE	TRUE	129	31	23.9219
F:\25-03-2022\20220324-TEST BROTH-POS-00.d	2505	scanId=1432770		23.8794	428.749	1210.08	2	855.483	55	5094.53	R.IAELPASR.L	IAELPASR	DECOY_WP_036162234.1 MULTISPECIES: anthranilate phosphoribosyltransferase [Lysinibacillus]	83	90	0	855.481	0.00182614	2.13463	3	14	0.214286	482.501	0.0947096	3.09471	FALSE	TRUE	129	32	24.5036
F:\25-03-2022\20220324-TEST BROTH-POS-00.d	4245	scanId=2432056		40.5341	612.816	1790.47	2	1223.62	69	5027.87	K.VFAVNTTAVM(oxidation of M)R.S	VFAVNTTAVMR	WP_012293892.1 MULTISPECIES: SDR family oxidoreductase [Lysinibacillus]	110	120	0	1223.63	-0.0154253	-12.6061	3	20	0.15	474.741	0.0944219	3.09442	TRUE	FALSE	130	32	24.5036
F:\25-03-2022\20220324-TEST BROTH-POS-00.d	4173	scanId=2395060		39.9175	757.414	4113.5	2	1512.81	153	12791.2	K.RKEAEAIEEPTLK.V	RKEAEAIEEPTLK	DECOY_WP_012292591.1 MULTISPECIES: Na+/H+ antiporter NhaC [Lysinibacillus]	18	30	2	1512.81	-0.00200805	-1.32736	3	24	0.125	1196.75	0.0935608	3.09356	FALSE	TRUE	130	33	25.2693
F:\25-03-2022\20220324-TEST BROTH-POS-00.d	3351	scanId=1930434		32.1738	614.333	610.704	2	1226.65	44	2589.69	K.ATVPEIHIYGK.D	ATVPEIHIYGK	DECOY_WP_031416904.1 MULTISPECIES: nucleotidyltransferase-like protein [Lysinibacillus]	23	33	0	1226.67	-0.0147389	-12.0154	3	20	0.15	239.265	0.0923911	3.09239	FALSE	TRUE	130	34	25.6406
F:\25-03-2022\20220324-TEST BROTH-POS-00.d	2952	scanId=1693983		28.2329	624.347	1783.6	2	1246.68	81	6864.09	R.SIRNSQGMKVK.Q	SIRNSQGMKVK	WP_197148452.1 MULTISPECIES: isoleucine--tRNA ligase [Lysinibacillus]	803	813	2	1246.68	-0.00212657	-1.70578	3	20	0.15	629.276	0.0916766	3.09168	TRUE	FALSE	131	34	25.6406
F:\25-03-2022\20220324-TEST BROTH-POS-00.d	2160	scanId=1226012		20.4334	429.249	1257.57	2	856.484	64	8333.61	K.VAGIEVNR.K	VAGIEVNR	WP_010860160.1 MULTISPECIES: 50S ribosomal protein L20 [Lysinibacillus]	85	92	0	856.477	0.00714196	8.33877	3	14	0.214286	758.496	0.0910165	3.09102	TRUE	FALSE	132	34	25.6406
F:\25-03-2022\20220324-TEST BROTH-POS-00.d	3929	scanId=2264970		37.7494	1008.53	1627.07	2	2015.05	101	7316.02	R.AVAQGIRGM(oxidation of M)GIIGVTAGSVDK.G	AVAQGIRGMGIIGVTAGSVDK	DECOY_WP_012292619.1 MULTISPECIES: D-glycerate dehydrogenase [Lysinibacillus]	159	179	1	2015.08	-0.030779	-15.2743	3	40	0.075	658.792	0.090048	3.09005	FALSE	TRUE	132	35	26.1963
F:\25-03-2022\20220324-TEST BROTH-POS-00.d	2028	scanId=1147232		19.1204	487.751	887.198	2	973.486	48	4256.51	R.SLQDDLQR.R	SLQDDLQR	WP_012293661.1 MULTISPECIES: CCA tRNA nucleotidyltransferase [Lysinibacillus]	105	112	0	973.483	0.00361454	3.71299	3	14	0.214286	382.962	0.0899707	3.08997	TRUE	FALSE	133	35	26.1963
F:\25-03-2022\20220324-TEST BROTH-POS-00.d	3722	scanId=2149044		35.8173	414.271	1386.42	2	826.527	53	4527.21	K.IVAVGGALK.A	IVAVGGALK	DECOY_WP_126659346.1 MULTISPECIES: chaperonin GroEL [Lysinibacillus]	168	176	0	826.528	-0.00102792	-1.24366	3	16	0.1875	406.055	0.0896921	3.08969	FALSE	TRUE	133	36	26.9447
F:\25-03-2022\20220324-TEST BROTH-POS-00.d	1469	scanId=814014		13.5668	316.684	1110.77	2	631.352	49	4743.1	K.SIVGEK.K	SIVGEK	DECOY_WP_012295593.1 MULTISPECIES: transporter substrate-binding domain-containing protein [Lysinibacillus]	17	22	0	631.354	-0.00163383	-2.58782	3	10	0.3	414.508	0.0873918	3.08739	FALSE	TRUE	133	37	27.4865
F:\25-03-2022\20220324-TEST BROTH-POS-00.d	3500	scanId=2020469		33.6743	505.762	1675.12	2	1009.51	57	4529.77	K.LFFTPEEK.L	LFFTPEEK	WP_012294163.1 MULTISPECIES: oleate hydratase [Lysinibacillus]	153	160	0	1009.51	-0.00354631	-3.5129	3	14	0.214286	384.222	0.0848216	3.08482	TRUE	FALSE	134	37	27.4865
F:\25-03-2022\20220324-TEST BROTH-POS-00.d	2964	scanId=1700464		28.3409	542.316	1144.26	2	1082.62	85	6834.24	R.ASQFVKYLK.E	ASQFVKYLK	DECOY_WP_031417456.1 MULTISPECIES: biotin transporter BioY [Lysinibacillus]	16	24	1	1082.61	0.00579917	5.35665	3	16	0.1875	572.217	0.0837279	3.08373	FALSE	TRUE	134	38	28.2294
F:\25-03-2022\20220324-TEST BROTH-POS-00.d	5978	scanId=3391419		56.5235	667.38	2677.15	2	1332.75	130	10206	R.RNIRDYLVER.T	RNIRDYLVER	DECOY_WP_036124676.1 MULTISPECIES: tRNA (adenosine(37)-N6)-dimethylallyltransferase MiaA [Lysinibacillus]	85	94	2	1332.73	0.0199251	14.9507	3	18	0.166667	838.005	0.0821093	3.08211	FALSE	TRUE	134	39	28.9723
F:\25-03-2022\20220324-TEST BROTH-POS-00.d	4174	scanId=2395393		39.9231	759.404	2939.72	2	1516.79	99	7904.15	R.LQEMIADALDLASK.N	LQEMIADALDLASK	DECOY_WP_126657037.1 MULTISPECIES: DNA repair protein RecN [Lysinibacillus]	184	197	0	1516.78	0.0122744	8.09238	3	26	0.115385	643.089	0.0813609	3.08136	FALSE	TRUE	134	40	29.2782
F:\25-03-2022\20220324-TEST BROTH-POS-00.d	3599	scanId=2079581		34.6596	621.86	1720.81	2	1241.71	74	5288.93	K.LEGVLQPLVM(oxidation of M)K.V	LEGVLQPLVMK	WP_012295327.1 MULTISPECIES: molecular chaperone DnaK [Lysinibacillus]	561	571	0	1241.71	0.000405123	0.326264	3	20	0.15	426.316	0.0806053	3.08061	TRUE	FALSE	135	40	29.2782
F:\25-03-2022\20220324-TEST BROTH-POS-00.d	1378	scanId=760311		12.6717	362.664	793.114	2	723.314	37	2913.16	K.FSEDAR.S	FSEDAR	WP_068986766.1 MULTISPECIES: chaperonin GroEL [Lysinibacillus]	7	12	0	723.319	-0.00448606	-6.20205	3	10	0.3	234.536	0.0805093	3.08051	TRUE	FALSE	136	40	29.2782
F:\25-03-2022\20220324-TEST BROTH-POS-00.d	2429	scanId=1388062		23.1342	423.239	1614.18	2	844.463	46	3463.55	R.ISTTPGAAK.V	ISTTPGAAK	DECOY_WP_031416868.1 MULTISPECIES: fumarate hydratase [Lysinibacillus]	114	122	0	844.465	-0.00247582	-2.93182	3	16	0.1875	276.093	0.0797139	3.07971	FALSE	TRUE	136	41	29.5752
F:\25-03-2022\20220324-TEST BROTH-POS-00.d	2552	scanId=1460244		24.3373	368.211	1601.59	2	734.407	40	3908.36	-.MTSRIK.G	MTSRIK	WP_036224392.1 MULTISPECIES: hydroxymethylglutaryl-CoA reductase, degradative [Lysinibacillus]	1	6	1	734.411	-0.00393596	-5.35935	3	10	0.3	305.392	0.0781382	3.07814	TRUE	FALSE	137	41	29.5752
F:\25-03-2022\20220324-TEST BROTH-POS-00.d	1263	scanId=694628		11.577	446.236	1159.48	2	890.458	37	3986.65	-.MRTTINR.N	MRTTINR	WP_008178382.1 MULTISPECIES: diguanylate cyclase [Lysinibacillus]	1	7	1	890.476	-0.0173121	-19.4415	3	12	0.25	305.61	0.0766583	3.07666	TRUE	FALSE	138	41	29.5752
F:\25-03-2022\20220324-TEST BROTH-POS-00.d	3359	scanId=1935587		32.2597	879.47	2501.34	2	1756.92	43	2861.38	K.EDLSGIHQIFSRDIK.L	EDLSGIHQIFSRDIK	DECOY_WP_012293757.1 MULTISPECIES: GGDEF domain-containing phosphodiesterase [Lysinibacillus]	72	86	1	1756.91	0.0139573	7.94423	3	28	0.107143	217.422	0.075985	3.07598	FALSE	TRUE	138	42	30.2965
F:\25-03-2022\20220324-TEST BROTH-POS-00.d	2944	scanId=1689885		28.1646	616.321	641.184	2	1230.63	47	3260.28	K.IRNMVNLTDR.W	IRNMVNLTDR	DECOY_WP_012295289.1 MULTISPECIES: hypothetical protein [Lysinibacillus]	57	66	1	1230.65	-0.022887	-18.5975	3	18	0.166667	245.893	0.075421	3.07542	FALSE	TRUE	138	43	31.0179
F:\25-03-2022\20220324-TEST BROTH-POS-00.d	2319	scanId=1321412		22.0234	405.224	1223.94	2	808.434	47	4510.26	R.LAYFPAK.K	LAYFPAK	DECOY_WP_012292298.1 MULTISPECIES: FAD-dependent oxidoreductase [Lysinibacillus]	84	90	0	808.448	-0.0144207	-17.8375	3	12	0.25	337.72	0.0748782	3.07488	FALSE	TRUE	138	44	31.7392
F:\25-03-2022\20220324-TEST BROTH-POS-00.d	3917	scanId=2258822		37.6469	765.414	1218.45	2	1528.81	71	4987.59	K.EHIQRTFEVDKK.S	EHIQRTFEVDKK	DECOY_WP_012295626.1 MULTISPECIES: GntR family transcriptional regulator [Lysinibacillus]	108	119	2	1528.8	0.0127255	8.32387	3	22	0.136364	370.458	0.074276	3.07428	FALSE	TRUE	138	45	31.9969
F:\25-03-2022\20220324-TEST BROTH-POS-00.d	2598	scanId=1485455		24.7574	414.27	1659.43	2	826.526	44	3549.11	K.LAVIINGK.E	LAVIINGK	WP_036161876.1 MULTISPECIES: DNA alkylation repair protein [Lysinibacillus]	342	349	0	826.528	-0.00121937	-1.47529	3	14	0.214286	261.765	0.0737551	3.07376	TRUE	FALSE	139	45	31.9969
F:\25-03-2022\20220324-TEST BROTH-POS-00.d	2103	scanId=1192442		19.8739	438.228	1887.75	2	874.442	52	5717.56	K.LDAEGVGSK.T	LDAEGVGSK	WP_230591252.1 MULTISPECIES: YdcF family protein [Lysinibacillus]	209	217	0	874.44	0.00206175	2.3578	3	16	0.1875	419.825	0.0734273	3.07343	TRUE	FALSE	140	45	31.9969
F:\25-03-2022\20220324-TEST BROTH-POS-00.d	3989	scanId=2298413		38.3068	719.37	1275.62	2	1436.72	93	6133.94	R.TTTM(oxidation of M)SVNSPVKEK.I	TTTMSVNSPVKEK	DECOY_WP_012295643.1 MULTISPECIES: tRNA 4-thiouridine(8) synthase ThiI [Lysinibacillus]	141	153	1	1436.72	0.00685523	4.77145	3	24	0.125	448.284	0.0730826	3.07308	FALSE	TRUE	140	46	32.4759
F:\25-03-2022\20220324-TEST BROTH-POS-00.d	2718	scanId=1557203		25.9533	530.79	1366.04	2	1059.57	63	4411.84	R.VIFQPAEEK.G	VIFQPAEEK	WP_031416547.1 MULTISPECIES: M20 peptidase aminoacylase family protein [Lysinibacillus]	119	127	0	1059.56	0.00593135	5.59793	3	16	0.1875	320.251	0.0725889	3.07259	TRUE	FALSE	141	46	32.4759
F:\25-03-2022\20220324-TEST BROTH-POS-00.d	3535	scanId=2041524		34.0253	524.793	821.383	2	1047.57	43	3601.82	R.REGAVIEFK.R	REGAVIEFK	DECOY_WP_012296219.1 MULTISPECIES: ParB/RepB/Spo0J family partition protein [Lysinibacillus]	204	212	1	1047.57	-0.000223356	-0.213213	3	16	0.1875	259.914	0.0721619	3.07216	FALSE	TRUE	141	47	32.7178
F:\25-03-2022\20220324-TEST BROTH-POS-00.d	2842	scanId=1630663		27.1776	565.331	1188.44	2	1128.65	75	5848.15	K.KAEIDAQVKK.L	KAEIDAQVKK	WP_031416573.1 MULTISPECIES: C40 family peptidase [Lysinibacillus]	34	43	2	1128.65	-0.00222445	-1.9709	3	18	0.166667	417.609	0.0714088	3.07141	TRUE	FALSE	142	47	32.7178
F:\25-03-2022\20220324-TEST BROTH-POS-00.d	2739	scanId=1570444		26.1739	551.311	939.852	2	1100.61	62	5455.15	K.DVITQLSAVR.S	DVITQLSAVR	WP_012295889.1 MULTISPECIES: metal-sensitive transcriptional regulator [Lysinibacillus]	33	42	0	1100.62	-0.0121521	-11.0411	3	18	0.166667	388.041	0.0711331	3.07113	TRUE	FALSE	143	47	32.7178
F:\25-03-2022\20220324-TEST BROTH-POS-00.d	4365	scanId=2492057		41.5341	645.873	1463.37	2	1289.73	84	5944.7	R.FLQSLIVGSNGR.A	FLQSLIVGSNGR	DECOY_WP_012293222.1 MULTISPECIES: DAK2 domain-containing protein [Lysinibacillus]	461	472	0	1289.71	0.021855	16.9457	3	22	0.136364	422.466	0.071066	3.07107	FALSE	TRUE	143	48	32.7274
F:\25-03-2022\20220324-TEST BROTH-POS-00.d	1969	scanId=1111001		18.5165	382.686	1023.49	2	763.357	62	6455.46	K.EAANTMK.R	EAANTMK	WP_036161060.1 MULTISPECIES: aldehyde dehydrogenase family protein [Lysinibacillus]	248	254	0	763.353	0.00386233	5.05969	3	12	0.25	453.671	0.0702772	3.07028	TRUE	FALSE	144	48	32.7274
F:\25-03-2022\20220324-TEST BROTH-POS-00.d	3922	scanId=2261922		37.6986	788.403	1988.59	2	1574.79	89	5850.8	K.NLGATSVLSPYDPNK.I	NLGATSVLSPYDPNK	WP_012292910.1 MULTISPECIES: sulfatase-like hydrolase/transferase [Lysinibacillus]	465	479	0	1574.79	-0.00292434	-1.85697	3	28	0.107143	409.654	0.0700169	3.07002	TRUE	FALSE	145	48	32.7274
F:\25-03-2022\20220324-TEST BROTH-POS-00.d	4119	scanId=2367209		39.4534	709.383	3349.27	2	1416.75	112	7455.68	R.VLQFKPGLLC[carbamidomethylation of C]DK.A	VLQFKPGLLCDK	WP_205447410.1 MULTISPECIES: aminotransferase class III-fold pyridoxal phosphate-dependent enzyme [Lysinibacillus]	384	395	0	1416.78	-0.0274996	-19.4099	3	22	0.136364	521.376	0.0699301	3.06993	TRUE	FALSE	146	48	32.7274
F:\25-03-2022\20220324-TEST BROTH-POS-00.d	2051	scanId=1161138		19.3522	342.705	2306.26	2	683.396	62	6038.46	R.LPLGER.L	LPLGER	DECOY_WP_036161751.1 MULTISPECIES: 5-methyltetrahydropteroyltriglutamate--homocysteine S-methyltransferase [Lysinibacillus]	153	158	0	683.397	-0.00105636	-1.54575	3	10	0.3	411.567	0.0681577	3.06816	FALSE	TRUE	146	49	33.1819
F:\25-03-2022\20220324-TEST BROTH-POS-00.d	3482	scanId=2009115		33.4851	493.798	951.762	2	985.582	51	3557.32	K.LTGGVEGLLK.G	LTGGVEGLLK	WP_012293096.1 MULTISPECIES: dihydrolipoyl dehydrogenase [Lysinibacillus]	99	108	0	985.581	0.000751601	0.762597	3	18	0.166667	237.204	0.0666807	3.06668	TRUE	FALSE	147	49	33.1819
F:\25-03-2022\20220324-TEST BROTH-POS-00.d	3516	scanId=2030055		33.8341	465.768	1008.17	2	929.521	51	4133.26	K.NPIMKSIK.E	NPIMKSIK	DECOY_WP_171821124.1 MULTISPECIES: DNA polymerase III subunit alpha [Lysinibacillus]	592	599	1	929.537	-0.0161486	-17.3727	3	14	0.214286	274.066	0.0663074	3.06631	FALSE	TRUE	147	50	33.6303
F:\25-03-2022\20220324-TEST BROTH-POS-00.d	2735	scanId=1568228		26.137	451.261	945.156	2	900.507	64	4921.76	K.KVYVQHK.L	KVYVQHK	WP_036220092.1 MULTISPECIES: assimilatory sulfite reductase (NADPH) flavoprotein subunit [Lysinibacillus]	519	525	1	900.518	-0.011373	-12.6294	3	12	0.25	320.808	0.0651815	3.06518	TRUE	FALSE	148	50	33.6303
F:\25-03-2022\20220324-TEST BROTH-POS-00.d	3902	scanId=2251509		37.525	971.506	2124	2	1941	111	7279.85	K.LQDFTFPKLIYDTVNK.R	LQDFTFPKLIYDTVNK	DECOY_WP_012293101.1 MULTISPECIES: response regulator [Lysinibacillus]	118	133	1	1941.02	-0.027652	-14.2461	3	30	0.1	470.552	0.0646376	3.06464	FALSE	TRUE	148	51	34.0727
F:\25-03-2022\20220324-TEST BROTH-POS-00.d	2777	scanId=1591440		26.5239	514.274	972.236	2	1026.53	39	3012.8	K.LPIVDEEGR.L	LPIVDEEGR	WP_012291837.1 MULTISPECIES: IMP dehydrogenase [Lysinibacillus]	186	194	0	1026.53	-0.000201361	-0.196156	3	16	0.1875	193.625	0.0642674	3.06427	TRUE	FALSE	149	51	34.0727
F:\25-03-2022\20220324-TEST BROTH-POS-00.d	5605	scanId=3175892		52.9314	1314.69	881.404	2	2627.37	101	6166.21	M.LSAPVRDINELMIGTGIAVC[carbamidomethylation of C]DMPR.E	LSAPVRDINELMIGTGIAVCDMPR	DECOY_WP_008180529.1 MULTISPECIES: rod shape-determining protein [Lysinibacillus]	2	25	1	2627.32	0.0485147	18.4654	3	46	0.0652174	391.041	0.0634167	3.06342	FALSE	TRUE	149	52	34.5092
F:\25-03-2022\20220324-TEST BROTH-POS-00.d	2785	scanId=1596039		26.6005	479.287	1269	2	956.56	66	5510.76	M.ANITAQLVK.E	ANITAQLVK	WP_012293292.1 MULTISPECIES: translation elongation factor Ts [Lysinibacillus]	2	10	0	956.565	-0.00537047	-5.61432	3	16	0.1875	340.533	0.0617942	3.06179	TRUE	FALSE	150	52	34.5092
F:\25-03-2022\20220324-TEST BROTH-POS-00.d	2907	scanId=1667393		27.7898	629.829	623.835	2	1257.64	35	2095.75	R.LEHSVNAVFDK.R	LEHSVNAVFDK	DECOY_WP_031418633.1 MULTISPECIES: ATP-binding protein [Lysinibacillus]	213	223	0	1257.64	0.00874729	6.95535	3	20	0.15	126.946	0.0605733	3.06057	FALSE	TRUE	150	53	34.71
F:\25-03-2022\20220324-TEST BROTH-POS-00.d	2887	scanId=1656313		27.6051	350.243	1431.01	2	698.472	47	3625.11	K.ILVNLK.Q	ILVNLK	WP_012292114.1 MULTISPECIES: TerD family protein [Lysinibacillus]	92	97	0	698.469	0.0032985	4.72247	3	10	0.3	213.22	0.0588177	3.05882	TRUE	FALSE	151	53	34.71
F:\25-03-2022\20220324-TEST BROTH-POS-00.d	5247	scanId=2966339		49.4389	1145.59	1706.77	2	2289.16	117	7686.45	R.NGC[carbamidomethylation of C]IVQVLM(oxidation of M)ETGC[carbamidomethylation of C]KPAELVR.M	NGCIVQVLMETGCKPAELVR	WP_217581112.1 MULTISPECIES: tyrosine-type recombinase/integrase [Lysinibacillus]	145	164	0	2289.13	0.0301705	13.1799	3	38	0.0789474	446.918	0.0581436	3.05814	TRUE	FALSE	152	53	34.71
F:\25-03-2022\20220324-TEST BROTH-POS-00.d	5201	scanId=2938197		48.9698	795.922	1633.25	2	1589.83	87	5696.21	R.INIEKQMAGC[carbamidomethylation of C]TGIR.I	INIEKQMAGCTGIR	DECOY_WP_217580954.1 MULTISPECIES: purine-nucleoside phosphorylase [Lysinibacillus]	137	150	1	1589.8	0.0274161	17.245	3	26	0.115385	330.021	0.057937	3.05794	FALSE	TRUE	152	54	34.9057
F:\25-03-2022\20220324-TEST BROTH-POS-00.d	3105	scanId=1784013		29.7334	601.813	782.305	2	1201.61	51	2957.61	K.ALIELDGTENK.G	ALIELDGTENK	WP_012292248.1 MULTISPECIES: phosphopyruvate hydratase [Lysinibacillus]	94	104	0	1201.62	-0.0078854	-6.56232	3	20	0.15	170.517	0.0576535	3.05765	TRUE	FALSE	153	54	34.9057
F:\25-03-2022\20220324-TEST BROTH-POS-00.d	3135	scanId=1801849		30.0307	623.327	1880.13	2	1244.64	84	7044.17	K.RAEQPSVTTTR.A	RAEQPSVTTTR	WP_012293016.1 MULTISPECIES: efflux RND transporter permease subunit [Lysinibacillus]	262	272	1	1244.65	-0.00881667	-7.08367	3	20	0.15	403.88	0.0573353	3.05734	TRUE	FALSE	154	54	34.9057
F:\25-03-2022\20220324-TEST BROTH-POS-00.d	2464	scanId=1410056		23.5008	492.288	1809.06	2	982.562	56	7078.1	M.LPGSIGQRR.I	LPGSIGQRR	DECOY_WP_126657725.1 MULTISPECIES: cytochrome b6 [Lysinibacillus]	2	10	1	982.567	-0.00504743	-5.13698	3	16	0.1875	398.566	0.0563097	3.05631	FALSE	TRUE	154	55	34.9756
F:\25-03-2022\20220324-TEST BROTH-POS-00.d	4383	scanId=2500087		41.668	1206.12	1741.82	2	2410.23	84	5963.25	K.IPEETIDAIKQETLVFDGGAHK.Q	IPEETIDAIKQETLVFDGGAHK	DECOY_WP_010858821.1 MULTISPECIES: ubiquinol-cytochrome c reductase iron-sulfur subunit [Lysinibacillus]	106	127	1	2410.24	-0.00931254	-3.86374	3	42	0.0714286	333.219	0.0558788	3.05588	FALSE	TRUE	154	56	34.9756
F:\25-03-2022\20220324-TEST BROTH-POS-00.d	3444	scanId=1985789		33.0964	515.302	862.577	2	1028.59	49	3126.38	K.LAC[carbamidomethylation of C]LRGALR.Y	LACLRGALR	WP_012295141.1 MULTISPECIES: molecular chaperone [Lysinibacillus]	702	710	1	1028.59	-0.00175995	-1.71103	3	16	0.1875	174.416	0.0557885	3.05579	TRUE	FALSE	155	56	34.9756
F:\25-03-2022\20220324-TEST BROTH-POS-00.d	4520	scanId=2568946		42.8156	1061.56	2862.9	2	2121.1	91	5494.9	R.SVTGEYSPLTDISVQLREK.L	SVTGEYSPLTDISVQLREK	DECOY_WP_012291666.1 MULTISPECIES: DNA cytosine methyltransferase [Lysinibacillus]	407	425	1	2121.1	0.000733801	0.345954	3	36	0.0833333	301.422	0.0548548	3.05485	FALSE	TRUE	155	57	34.9756
F:\25-03-2022\20220324-TEST BROTH-POS-00.d	4014	scanId=2311927		38.532	1040.04	944.243	2	2078.07	102	6421.81	R.LLQIM(oxidation of M)EPAEFRQFKQGK.V	LLQIMEPAEFRQFKQGK	WP_082011579.1 MULTISPECIES: reverse transcriptase domain-containing protein [Lysinibacillus]	231	247	2	2078.1	-0.0261454	-12.5814	3	32	0.09375	348.304	0.0542377	3.05424	TRUE	FALSE	156	57	34.9756
F:\25-03-2022\20220324-TEST BROTH-POS-00.d	5700	scanId=3231205		53.8533	1022.54	810.741	2	2043.07	99	5903.73	R.EQGVRVESLAIVDSLEDGK.V	EQGVRVESLAIVDSLEDGK	WP_036162548.1 MULTISPECIES: xanthine phosphoribosyltransferase [Lysinibacillus]	167	185	1	2043.05	0.0230094	11.2623	3	36	0.0833333	319.527	0.0541229	3.05412	TRUE	FALSE	157	57	34.9756
F:\25-03-2022\20220324-TEST BROTH-POS-00.d	2608	scanId=1491439		24.8572	358.223	1313.43	2	714.431	66	7327.9	R.IGDIGIK.V	IGDIGIK	WP_012295807.1 MULTISPECIES: succinate CoA transferase [Lysinibacillus]	202	208	0	714.428	0.00302286	4.23117	3	12	0.25	395.807	0.0540137	3.05401	TRUE	FALSE	158	57	34.9756
F:\25-03-2022\20220324-TEST BROTH-POS-00.d	3088	scanId=1775701		29.5949	673.866	669.562	2	1345.72	48	2979.45	K.VGAPFVEGATVTAK.A	VGAPFVEGATVTAK	WP_010860053.1 MULTISPECIES: 50S ribosomal protein L21 [Lysinibacillus]	48	61	0	1345.72	-0.00690839	-5.13358	3	26	0.115385	160.686	0.0539315	3.05393	TRUE	FALSE	159	57	34.9756
F:\25-03-2022\20220324-TEST BROTH-POS-00.d	3975	scanId=2289995		38.1664	522.808	1390.89	2	1043.6	73	6129.09	R.DALKKQDVK.V	DALKKQDVK	WP_012296105.1 MULTISPECIES: DUF4003 family protein [Lysinibacillus]	215	223	2	1043.6	0.00412307	3.95083	3	16	0.1875	326.618	0.0532899	3.05329	TRUE	FALSE	160	57	34.9756
F:\25-03-2022\20220324-TEST BROTH-POS-00.d	2434	scanId=1391329		23.1887	491.784	999.621	2	981.554	56	4381.4	R.IPAVQEAVR.K	IPAVQEAVR	WP_012295327.1 MULTISPECIES: molecular chaperone DnaK [Lysinibacillus]	316	324	0	981.561	-0.00657735	-6.70091	3	16	0.1875	232.227	0.0530028	3.053	TRUE	FALSE	161	57	34.9756
F:\25-03-2022\20220324-TEST BROTH-POS-00.d	5677	scanId=3218343		53.6389	673.361	2229.47	2	1344.71	107	7709.63	K.ENVDEIIARMR.Q	ENVDEIIARMR	WP_009371656.1 MULTISPECIES: serine--tRNA ligase [Lysinibacillus]	67	77	1	1344.68	0.0247035	18.3713	3	20	0.15	404.484	0.0524648	3.05246	TRUE	FALSE	162	57	34.9756
F:\25-03-2022\20220324-TEST BROTH-POS-00.d	4101	scanId=2356743		39.2789	708.397	1472.81	2	1414.78	87	6295.84	K.GVLGRQGKEAC[carbamidomethylation of C]IK.A	GVLGRQGKEACIK	DECOY_WP_012293449.1 MULTISPECIES: guanine deaminase [Lysinibacillus]	294	306	2	1414.77	0.0073962	5.22784	3	24	0.125	329.489	0.0523345	3.05233	FALSE	TRUE	162	58	34.9756
F:\25-03-2022\20220324-TEST BROTH-POS-00.d	4451	scanId=2535019		42.2502	1250.62	1354.29	2	2499.22	96	5855.34	K.VMKNDFVFAM(oxidation of M)TGYHPDHSFIK.A	VMKNDFVFAMTGYHPDHSFIK	WP_012293597.1 MULTISPECIES: YpdA family putative bacillithiol disulfide reductase [Lysinibacillus]	238	258	1	2499.17	0.0447395	17.9017	3	40	0.075	303.749	0.0518755	3.05188	TRUE	FALSE	163	58	34.9756
F:\25-03-2022\20220324-TEST BROTH-POS-00.d	3856	scanId=2224922		37.0819	729.4	3014.7	2	1456.79	62	4609.04	K.LNETENVVIGKNK.A	LNETENVVIGKNK	DECOY_WP_227256954.1 MULTISPECIES: right-handed parallel beta-helix repeat-containing protein [Lysinibacillus]	322	334	1	1456.79	-0.0033889	-2.32628	3	24	0.125	234.795	0.0509423	3.05094	FALSE	TRUE	163	59	34.9756
F:\25-03-2022\20220324-TEST BROTH-POS-00.d	2836	scanId=1627063		27.1176	457.274	1080.27	2	912.533	52	3839.4	K.AINQLINK.L	AINQLINK	DECOY_WP_036161990.1 MULTISPECIES: non-ribosomal peptide synthetase [Lysinibacillus]	865	872	0	912.539	-0.00613757	-6.72581	3	14	0.214286	194.427	0.0506399	3.05064	FALSE	TRUE	163	60	34.9756
F:\25-03-2022\20220324-TEST BROTH-POS-00.d	4143	scanId=2379505		39.6583	681.372	1564.67	2	1360.73	105	8726.04	K.GTNGAMTVLAIADK.G	GTNGAMTVLAIADK	WP_012292740.1 MULTISPECIES: class II fructose-bisphosphatase [Lysinibacillus]	97	110	0	1360.7	0.0265701	19.5268	3	26	0.115385	437.278	0.0501119	3.05011	TRUE	FALSE	164	60	34.9756
F:\25-03-2022\20220324-TEST BROTH-POS-00.d	3606	scanId=2083512		34.7251	565.314	1014.42	2	1128.61	43	2701.54	R.EAVASIIDGVR.K	EAVASIIDGVR	WP_012295469.1 MULTISPECIES: rod shape-determining protein [Lysinibacillus]	255	265	0	1128.61	0.000471355	0.41764	3	20	0.15	134.4	0.0497494	3.04975	TRUE	FALSE	165	60	34.9756
F:\25-03-2022\20220324-TEST BROTH-POS-00.d	3524	scanId=2035207		33.92	771.344	819.862	2	1540.67	61	4519.28	R.EDNFAEEVM(oxidation of M)SQVK.G	EDNFAEEVMSQVK	WP_012293292.1 MULTISPECIES: translation elongation factor Ts [Lysinibacillus]	281	293	0	1540.67	0.00265391	1.72257	3	24	0.125	224.79	0.0497404	3.04974	TRUE	FALSE	166	60	34.9756
F:\25-03-2022\20220324-TEST BROTH-POS-00.d	5360	scanId=3031067		50.5177	1499.77	672.091	2	2997.52	60	3168.37	K.AIEENAQIIFVRDQDVAGGEGAGFQVHK.K	AIEENAQIIFVRDQDVAGGEGAGFQVHK	WP_036161419.1 MULTISPECIES: isochorismatase family protein [Lysinibacillus]	41	68	1	2997.49	0.0269596	8.99404	3	54	0.0555556	156.773	0.0494807	3.04948	TRUE	FALSE	167	60	34.9756
F:\25-03-2022\20220324-TEST BROTH-POS-00.d	1799	scanId=1012301		16.8715	479.765	1267.13	2	957.516	70	5226.84	K.IPTSNNSII.-	IPTSNNSII	DECOY_WP_036161832.1 MULTISPECIES: VOC family protein [Lysinibacillus]	125	133	0	957.513	0.00316071	3.30095	3	16	0.1875	257.377	0.0492413	3.04924	FALSE	TRUE	167	61	34.9756
F:\25-03-2022\20220324-TEST BROTH-POS-00.d	5900	scanId=3345857		55.7642	1283.19	897.391	2	2564.36	87	4620.97	K.DTIAITAKNGIIVASTNNASFGMKK.F	DTIAITAKNGIIVASTNNASFGMKK	WP_036161571.1 MULTISPECIES: class I SAM-dependent rRNA methyltransferase [Lysinibacillus]	325	349	2	2564.36	-0.00237841	-0.927487	3	48	0.0625	226.393	0.0489926	3.04899	TRUE	FALSE	168	61	34.9756
F:\25-03-2022\20220324-TEST BROTH-POS-00.d	4240	scanId=2428956		40.4825	746.383	1326.79	2	1490.75	66	4583.24	K.SVMLLQSESSAALR.L	SVMLLQSESSAALR	DECOY_WP_012292898.1 MULTISPECIES: flagellar hook-associated protein FlgK [Lysinibacillus]	53	66	0	1490.78	-0.02475	-16.6021	3	26	0.115385	221.046	0.0482291	3.04823	FALSE	TRUE	168	62	34.9756
F:\25-03-2022\20220324-TEST BROTH-POS-00.d	5861	scanId=3323846		55.3973	1037.99	1156.4	2	2073.97	103	6328.15	K.NYGIVEYVHEAHEVMER.A	NYGIVEYVHEAHEVMER	WP_012292663.1 MULTISPECIES: enoyl-CoA hydratase [Lysinibacillus]	175	191	0	2073.96	0.0116497	5.61714	3	32	0.09375	301.105	0.0475819	3.04758	TRUE	FALSE	169	62	34.9756
F:\25-03-2022\20220324-TEST BROTH-POS-00.d	2748	scanId=1574875		26.2478	501.781	1253.17	2	1001.55	39	2610.76	K.VGDVVSITGR.M	VGDVVSITGR	WP_031416868.1 MULTISPECIES: fumarate hydratase [Lysinibacillus]	339	348	0	1001.55	-0.00340112	-3.39586	3	18	0.166667	123.595	0.0473404	3.04734	TRUE	FALSE	170	62	34.9756
F:\25-03-2022\20220324-TEST BROTH-POS-00.d	1592	scanId=887512		14.7917	359.715	652.954	2	717.416	42	4017.72	M.KVSEQK.L	KVSEQK	DECOY_WP_036162118.1 MULTISPECIES: LTA synthase family protein [Lysinibacillus]	2	7	1	717.402	0.013819	19.2625	3	10	0.3	188.243	0.0468531	3.04685	FALSE	TRUE	170	63	34.9756
F:\25-03-2022\20220324-TEST BROTH-POS-00.d	3956	scanId=2279193		37.9864	750.427	1909.01	2	1498.84	62	5029.39	K.EKLEGVLQPLVM(oxidation of M)K.V	EKLEGVLQPLVMK	WP_012295327.1 MULTISPECIES: molecular chaperone DnaK [Lysinibacillus]	559	571	1	1498.84	-0.00374916	-2.50137	3	24	0.125	235.332	0.0467915	3.04679	TRUE	FALSE	171	63	34.9756
F:\25-03-2022\20220324-TEST BROTH-POS-00.d	6858	scanId=3892537		64.8755	1390.73	1545.44	2	2779.44	144	9804.24	-.MKKWLLC[carbamidomethylation of C]GATLLM(oxidation of M)LSPNAAYAQQR.E	MKKWLLCGATLLMLSPNAAYAQQR	WP_036160584.1 MULTISPECIES: DUF5050 domain-containing protein [Lysinibacillus]	1	24	2	2779.43	0.00823369	2.96236	3	46	0.0652174	458.676	0.0467835	3.04678	TRUE	FALSE	172	63	34.9756
F:\25-03-2022\20220324-TEST BROTH-POS-00.d	3146	scanId=1809104		30.1516	472.274	2222.3	2	942.533	86	7099.26	R.QELKVNGR.D	QELKVNGR	WP_012295819.1 MULTISPECIES: DUF2500 domain-containing protein [Lysinibacillus]	84	91	1	942.525	0.00850705	9.02581	3	14	0.214286	330.112	0.0464995	3.0465	TRUE	FALSE	173	63	34.9756
F:\25-03-2022\20220324-TEST BROTH-POS-00.d	2067	scanId=1170671		19.5111	402.726	944.004	2	803.438	60	5841.58	M.SSVDGVLK.Y	SSVDGVLK	DECOY_WP_012292524.1 MULTISPECIES: response regulator transcription factor [Lysinibacillus]	2	9	0	803.439	-0.000718349	-0.894092	3	14	0.214286	270.316	0.0462744	3.04627	FALSE	TRUE	173	64	34.9756
F:\25-03-2022\20220324-TEST BROTH-POS-00.d	3137	scanId=1803233		30.0538	634.316	565.842	2	1266.62	39	2609.73	K.FEKTAGISGDDK.N	FEKTAGISGDDK	WP_012292448.1 MULTISPECIES: GMC family oxidoreductase [Lysinibacillus]	153	164	1	1266.61	0.00896206	7.07563	3	22	0.136364	118.03	0.0452269	3.04523	TRUE	FALSE	174	64	34.9756
F:\25-03-2022\20220324-TEST BROTH-POS-00.d	4209	scanId=2412118		40.2018	737.905	2621.56	2	1473.79	96	8017.33	M.DTLSLEERVALTK.S	DTLSLEERVALTK	WP_225316267.1 MULTISPECIES: isoprenyl transferase [Lysinibacillus]	2	14	1	1473.8	-0.00919156	-6.23663	3	24	0.125	361.201	0.0450525	3.04505	TRUE	FALSE	175	64	34.9756
F:\25-03-2022\20220324-TEST BROTH-POS-00.d	2973	scanId=1706502		28.4416	507.785	1460.61	2	1013.55	57	4886.65	K.GIGLIASNGGR.I	GIGLIASNGGR	WP_012295678.1 MULTISPECIES: iron-containing alcohol dehydrogenase [Lysinibacillus]	108	118	0	1013.56	-0.00686962	-6.7777	3	20	0.15	218.882	0.0447919	3.04479	TRUE	FALSE	176	64	34.9756
F:\25-03-2022\20220324-TEST BROTH-POS-00.d	3274	scanId=1885281		31.4212	739.387	625.853	2	1476.76	44	2536.27	R.TTAITPEVEM(oxidation of M)LEK.S	TTAITPEVEMLEK	WP_227256803.1 MULTISPECIES: sigma-70 family RNA polymerase sigma factor [Lysinibacillus]	86	98	0	1476.74	0.0210387	14.2467	3	24	0.125	112.048	0.0441784	3.04418	TRUE	FALSE	177	64	34.9756
F:\25-03-2022\20220324-TEST BROTH-POS-00.d	4024	scanId=2317410		38.6234	718.378	1158.12	2	1434.74	71	4639.51	R.FTQAGSEVSALLGR.M	FTQAGSEVSALLGR	WP_012292768.1 MULTISPECIES: F0F1 ATP synthase subunit beta [Lysinibacillus]	255	268	0	1434.75	-0.00511837	-3.56744	3	26	0.115385	201.419	0.0434138	3.04341	TRUE	FALSE	178	64	34.9756
F:\25-03-2022\20220324-TEST BROTH-POS-00.d	3139	scanId=1804617		30.0768	594.328	689.532	2	1186.64	71	5213.9	R.LVGSIDEVVEK.A	LVGSIDEVVEK	WP_012292768.1 MULTISPECIES: F0F1 ATP synthase subunit beta [Lysinibacillus]	453	463	0	1186.64	-0.00216101	-1.82111	3	20	0.15	222.883	0.0427478	3.04275	TRUE	FALSE	179	64	34.9756
F:\25-03-2022\20220324-TEST BROTH-POS-00.d	3767	scanId=2173639		36.2272	747.9	1581.53	2	1493.78	90	6411.8	R.VEAVRHHFPQM(oxidation of M)K.A	VEAVRHHFPQMK	WP_012295382.1 MULTISPECIES: 5'-methylthioadenosine/S-adenosylhomocysteine nucleosidase [Lysinibacillus]	159	170	1	1493.76	0.0284926	19.0745	3	22	0.136364	270.515	0.0421903	3.04219	TRUE	FALSE	180	64	34.9756
F:\25-03-2022\20220324-TEST BROTH-POS-00.d	5145	scanId=2905379		48.4228	948.512	805.649	2	1895.01	72	5319.17	R.VLETIDHM(oxidation of M)VIVVGLWR.G	VLETIDHMVIVVGLWR	DECOY_WP_031418633.1 MULTISPECIES: ATP-binding protein [Lysinibacillus]	230	245	0	1895.03	-0.0239572	-12.6421	3	30	0.1	216.5	0.0407018	3.0407	FALSE	TRUE	180	65	34.9756
F:\25-03-2022\20220324-TEST BROTH-POS-00.d	5629	scanId=3190026		53.167	1082.02	594.921	2	2162.03	75	4018.08	R.ELQDIIAILGM(oxidation of M)DELSDEDK.Q	ELQDIIAILGMDELSDEDK	WP_012292768.1 MULTISPECIES: F0F1 ATP synthase subunit beta [Lysinibacillus]	377	395	0	2162.03	-0.00389691	-1.80243	3	36	0.0833333	163.144	0.0406024	3.0406	TRUE	FALSE	181	65	34.9756
F:\25-03-2022\20220324-TEST BROTH-POS-00.d	4416	scanId=2516695		41.9448	578.323	2245.33	2	1154.63	80	5062.01	K.AVEKFDYRK.G	AVEKFDYRK	WP_012295242.1 MULTISPECIES: RNA polymerase sigma factor RpoD [Lysinibacillus]	178	186	2	1154.61	0.0226124	19.5845	3	16	0.1875	200.806	0.0396692	3.03967	TRUE	FALSE	182	65	34.9756
F:\25-03-2022\20220324-TEST BROTH-POS-00.d	4213	scanId=2414168		40.236	759.899	1957.42	2	1517.78	81	6019.74	K.QGILM(oxidation of M)TVDLDPSTI.-	QGILMTVDLDPSTI	WP_012293206.1 MULTISPECIES: primosomal protein N' [Lysinibacillus]	790	803	0	1517.76	0.0177853	11.7181	3	26	0.115385	235.984	0.0392016	3.0392	TRUE	FALSE	183	65	34.9756
F:\25-03-2022\20220324-TEST BROTH-POS-00.d	3141	scanId=1806003		30.0999	896.426	1961.61	2	1790.84	84	6184.51	K.DTAIVFGQETAM(oxidation of M)HAER.V	DTAIVFGQETAMHAER	WP_012295303.1 MULTISPECIES: hypothetical protein [Lysinibacillus]	10	25	0	1790.83	0.0117301	6.55012	3	30	0.1	236.906	0.0383062	3.03831	TRUE	FALSE	184	65	34.9756
F:\25-03-2022\20220324-TEST BROTH-POS-00.d	3806	scanId=2196290		36.6047	766.913	1032.71	2	1531.81	75	4602.74	K.FGSPLITNDGVTIAK.E	FGSPLITNDGVTIAK	WP_126659346.1 MULTISPECIES: chaperonin GroEL [Lysinibacillus]	43	57	0	1531.82	-0.0123487	-8.06146	3	28	0.107143	174.626	0.0379396	3.03794	TRUE	FALSE	185	65	34.9756
F:\25-03-2022\20220324-TEST BROTH-POS-00.d	4069	scanId=2340181		39.0029	382.229	5086.56	2	762.443	108	13916	M.FIKNNK.I	FIKNNK	DECOY_WP_012295993.1 MULTISPECIES: ABC-F type ribosomal protection protein [Lysinibacillus]	2	7	1	762.439	0.00371946	4.87838	3	10	0.3	522.017	0.037512	3.03751	FALSE	TRUE	185	66	35.1338
F:\25-03-2022\20220324-TEST BROTH-POS-00.d	5223	scanId=2952323		49.2052	1261.68	788.569	2	2521.35	111	6205.3	K.GIEM(oxidation of M)VYRSLLEATEKEGLQVIK.A	GIEMVYRSLLEATEKEGLQVIK	WP_012295328.1 nucleotide exchange factor GrpE [Lysinibacillus fusiformis]	123	144	2	2521.35	0.00258891	1.0268	3	42	0.0714286	231.782	0.0373522	3.03735	TRUE	FALSE	186	66	35.1338
F:\25-03-2022\20220324-TEST BROTH-POS-00.d	2568	scanId=1468006		24.4666	566.298	575.668	2	1130.58	35	2132.06	R.ITDVLSQAER.L	ITDVLSQAER	WP_012293272.1 MULTISPECIES: flagellar motor switch phosphatase FliY [Lysinibacillus]	393	402	0	1130.59	-0.0122329	-10.8199	3	18	0.166667	79.1353	0.0371168	3.03712	TRUE	FALSE	187	66	35.1338
F:\25-03-2022\20220324-TEST BROTH-POS-00.d	2957	scanId=1696698		28.2782	697.882	1341.54	2	1393.75	59	4339.9	R.VQEIDMLKQYK.Q	VQEIDMLKQYK	DECOY_WP_206700913.1 MULTISPECIES: PDZ domain-containing protein [Lysinibacillus]	265	275	1	1393.73	0.0227134	16.2969	3	20	0.15	161.004	0.0370984	3.0371	FALSE	TRUE	187	67	35.6661
F:\25-03-2022\20220324-TEST BROTH-POS-00.d	5242	scanId=2963239		49.3872	1145.09	1315.23	2	2288.17	111	7131.77	K.FTPVEALEGELRESSSVALVR.V	FTPVEALEGELRESSSVALVR	DECOY_WP_036160915.1 MULTISPECIES: tripartite tricarboxylate transporter substrate binding protein [Lysinibacillus]	85	105	1	2288.2	-0.0307671	-13.446	3	40	0.075	259.534	0.0363912	3.03639	FALSE	TRUE	187	68	36.1508
F:\25-03-2022\20220324-TEST BROTH-POS-00.d	5670	scanId=3214243		53.5706	878.494	1073.45	2	1754.97	80	5734.27	K.RVISDEPLSGLITVEK.D	RVISDEPLSGLITVEK	DECOY_WP_012293281.1 MULTISPECIES: MinD/ParA family protein [Lysinibacillus]	62	77	1	1754.98	-0.00427678	-2.43694	3	30	0.1	208.619	0.0363812	3.03638	FALSE	TRUE	187	69	36.1508
F:\25-03-2022\20220324-TEST BROTH-POS-00.d	5923	scanId=3359657		55.9941	1325.21	1140.1	2	2648.41	223	13363.7	K.RPLLGHYFLYQDKVMEIENRK.D	RPLLGHYFLYQDKVMEIENRK	WP_036162215.1 MULTISPECIES: U32 family peptidase [Lysinibacillus]	174	194	2	2648.39	0.0209057	7.89376	3	40	0.075	483.761	0.0361996	3.0362	TRUE	FALSE	188	69	36.1508
F:\25-03-2022\20220324-TEST BROTH-POS-00.d	6151	scanId=3490702		58.1782	1336.21	1390.69	2	2670.41	189	11516.1	K.DYIRVEPTSLASHILDAIGQLGFR.L	DYIRVEPTSLASHILDAIGQLGFR	WP_012294001.1 MULTISPECIES: sporulation protein [Lysinibacillus]	130	153	1	2670.41	-0.00458701	-1.71772	3	46	0.0652174	416.086	0.0361309	3.03613	TRUE	FALSE	189	69	36.1508
F:\25-03-2022\20220324-TEST BROTH-POS-00.d	6106	scanId=3464537		57.7422	1295.64	1547.4	2	2589.27	128	7068.12	K.ITQAGNMSKREAHAKPNLTFM(oxidation of M)TK.S	ITQAGNMSKREAHAKPNLTFMTK	WP_012295993.1 MULTISPECIES: ABC-F type ribosomal protection protein [Lysinibacillus]	222	244	2	2589.32	-0.0487443	-18.8252	3	44	0.0681818	255.31	0.0361213	3.03612	TRUE	FALSE	190	69	36.1508
F:\25-03-2022\20220324-TEST BROTH-POS-00.d	3598	scanId=2079248		34.654	735.91	6100.46	2	1469.81	138	12221.3	R.AVC[carbamidomethylation of C]ISHTVKTNLK.H	AVCISHTVKTNLK	DECOY_WP_031418233.1 MULTISPECIES: cytidine deaminase [Lysinibacillus]	60	72	1	1469.8	0.0031546	2.14628	3	24	0.125	435.693	0.0356504	3.03565	FALSE	TRUE	190	70	36.2927
F:\25-03-2022\20220324-TEST BROTH-POS-00.d	2260	scanId=1286726		21.4453	430.241	1011.39	2	858.468	56	4167.14	K.ETPSLKGK.T	ETPSLKGK	WP_024363077.1 MULTISPECIES: excalibur calcium-binding domain-containing protein [Lysinibacillus]	111	118	1	858.481	-0.0134111	-15.6218	3	14	0.214286	147.765	0.0354596	3.03546	TRUE	FALSE	191	70	36.2927
F:\25-03-2022\20220324-TEST BROTH-POS-00.d	5748	scanId=3259808		54.33	890.955	899.969	2	1779.9	112	7287.51	R.AQAKEIVDSLREFM(oxidation of M)K.V	AQAKEIVDSLREFMK	WP_171821101.1 MULTISPECIES: alpha/beta hydrolase [Lysinibacillus]	296	310	2	1779.92	-0.0225462	-12.667	3	28	0.107143	253.722	0.0348159	3.03482	TRUE	FALSE	192	70	36.2927
F:\25-03-2022\20220324-TEST BROTH-POS-00.d	3078	scanId=1770049		29.5007	558.309	816.894	2	1114.6	84	6858.2	K.VTIQEVGIEK.L	VTIQEVGIEK	DECOY_WP_031418843.1 MULTISPECIES: TrkA family potassium uptake protein [Lysinibacillus]	124	133	0	1114.62	-0.0196413	-17.6214	3	18	0.166667	233.584	0.034059	3.03406	FALSE	TRUE	192	71	36.8112
F:\25-03-2022\20220324-TEST BROTH-POS-00.d	5177	scanId=2923845		48.7306	795.921	1063.04	2	1589.83	104	6661.22	K.ALREGDTALKMTER.A	ALREGDTALKMTER	DECOY_WP_206701055.1 MULTISPECIES: methyl-accepting chemotaxis protein [Lysinibacillus]	220	233	2	1589.82	0.00755397	4.75146	3	26	0.115385	220.875	0.0331584	3.03316	FALSE	TRUE	192	72	37.1363
F:\25-03-2022\20220324-TEST BROTH-POS-00.d	3431	scanId=1978306		32.9716	547.28	1731.23	2	1092.55	57	4470.8	K.FDTVLDIDR.N	FDTVLDIDR	WP_036160583.1 MULTISPECIES: HAMP domain-containing histidine kinase [Lysinibacillus]	205	213	0	1092.55	0.00106465	0.974468	3	16	0.1875	144.579	0.0323384	3.03234	TRUE	FALSE	193	72	37.1363
F:\25-03-2022\20220324-TEST BROTH-POS-00.d	5876	scanId=3332109		55.535	1038.5	1143.3	2	2074.99	100	5389.53	K.VAYSMIPIHEFGAEDLGAR.I	VAYSMIPIHEFGAEDLGAR	DECOY_WP_012295480.1 MULTISPECIES: porphobilinogen synthase [Lysinibacillus]	133	151	0	2075.01	-0.0275238	-13.2644	3	36	0.0833333	174.214	0.0323246	3.03232	FALSE	TRUE	193	73	37.2659
F:\25-03-2022\20220324-TEST BROTH-POS-00.d	4861	scanId=2744989		45.7497	771.425	1236.99	2	1540.84	87	5988.18	K.FTIGNSPLSIDIHK.R	FTIGNSPLSIDIHK	WP_031418105.1 MULTISPECIES: PH domain-containing protein [Lysinibacillus]	103	116	0	1540.82	0.0102612	6.65955	3	26	0.115385	192.657	0.0321729	3.03217	TRUE	FALSE	194	73	37.2659
F:\25-03-2022\20220324-TEST BROTH-POS-00.d	4988	scanId=2814397		46.9065	771.426	925.423	2	1540.84	72	5004.61	K.FTIGNSPLSIDIHK.R	FTIGNSPLSIDIHK	WP_031418105.1 MULTISPECIES: PH domain-containing protein [Lysinibacillus]	103	116	0	1540.82	0.0122782	7.96857	3	26	0.115385	159.697	0.03191	3.03191	TRUE	FALSE	195	73	37.2659
F:\25-03-2022\20220324-TEST BROTH-POS-00.d	4499	scanId=2558447		42.6407	1070.07	1147.79	2	2138.13	127	10568.7	R.LWQIASGAVFVSGELAYTVK.G	LWQIASGAVFVSGELAYTVK	DECOY_WP_036160977.1 MULTISPECIES: glycerol kinase GlpK [Lysinibacillus]	184	203	0	2138.14	-0.0142374	-6.65876	3	38	0.0789474	334.275	0.0316287	3.03163	FALSE	TRUE	195	74	37.7764
F:\25-03-2022\20220324-TEST BROTH-POS-00.d	6272	scanId=3558067		59.301	771.394	1701.56	2	1540.77	109	7715.74	R.MITALAAVEHATEGK.I	MITALAAVEHATEGK	DECOY_WP_036162234.1 MULTISPECIES: anthranilate phosphoribosyltransferase [Lysinibacillus]	285	299	0	1540.79	-0.0178105	-11.5593	3	28	0.107143	240.546	0.031176	3.03118	FALSE	TRUE	195	75	38.2868
F:\25-03-2022\20220324-TEST BROTH-POS-00.d	4088	scanId=2350263		39.1709	942.513	1713.79	2	1883.01	107	7408.75	K.RPEALTALMSELIHM(oxidation of M)R.G	RPEALTALMSELIHMR	DECOY_WP_012293310.1 MULTISPECIES: polyribonucleotide nucleotidyltransferase [Lysinibacillus]	161	176	0	1882.98	0.0356725	18.9447	3	30	0.1	230.853	0.0311596	3.03116	FALSE	TRUE	195	76	38.5994
F:\25-03-2022\20220324-TEST BROTH-POS-00.d	1803	scanId=1014517		16.9085	385.75	831.346	2	769.485	90	8488.58	R.ISKPGLR.V	ISKPGLR	WP_008181717.1 MULTISPECIES: 30S ribosomal protein S8 [Lysinibacillus]	80	86	0	769.481	0.00377203	4.90205	3	12	0.25	261.395	0.0307938	3.03079	TRUE	FALSE	196	76	38.5994
F:\25-03-2022\20220324-TEST BROTH-POS-00.d	1797	scanId=1010917		16.8485	564.254	933.893	2	1126.49	78	5962.78	-.M(oxidation of M)ANQYGYHK.K	MANQYGYHK	DECOY_WP_012293860.1 MULTISPECIES: hydantoinase B/oxoprolinase family protein [Lysinibacillus]	1	9	0	1126.49	0.0058996	5.23717	3	16	0.1875	181.825	0.0304933	3.03049	FALSE	TRUE	196	77	39.018
F:\25-03-2022\20220324-TEST BROTH-POS-00.d	4689	scanId=2655163		44.2526	1038.03	2529.06	2	2074.05	143	9247.8	M.VNKSKSSSINPTPPSNYVR.S	VNKSKSSSINPTPPSNYVR	DECOY_WP_012292641.1 MULTISPECIES: serine acetyltransferase [Lysinibacillus]	2	20	2	2074.08	-0.0257573	-12.4187	3	36	0.0833333	279.437	0.0302166	3.03022	FALSE	TRUE	196	78	39.018
F:\25-03-2022\20220324-TEST BROTH-POS-00.d	4570	scanId=2593411		43.2234	619.87	2471.44	2	1237.72	87	7879.28	K.KGGFISKLFNK.G	KGGFISKLFNK	WP_036161284.1 MULTISPECIES: toxic anion resistance protein [Lysinibacillus]	129	139	2	1237.72	0.00625566	5.05419	3	20	0.15	229.101	0.0290764	3.02908	TRUE	FALSE	197	78	39.018
F:\25-03-2022\20220324-TEST BROTH-POS-00.d	6338	scanId=3597601		59.9599	1344.21	1202.26	2	2686.4	147	8867.35	K.KIELPIQYASISKQFVNASM(oxidation of M)LYK.H	KIELPIQYASISKQFVNASMLYK	WP_031418723.1 MULTISPECIES: competence protein ComK [Lysinibacillus]	128	150	2	2686.44	-0.036418	-13.5562	3	44	0.0681818	255.764	0.0288434	3.02884	TRUE	FALSE	198	78	39.018
F:\25-03-2022\20220324-TEST BROTH-POS-00.d	3986	scanId=2296696		38.2781	1040.05	1191.88	2	2078.08	106	6092.34	R.DIKAGC[carbamidomethylation of C]VDSLYRILNDAR.F	DIKAGCVDSLYRILNDAR	WP_036162500.1 MULTISPECIES: tRNA adenosine(34) deaminase TadA [Lysinibacillus]	97	114	2	2078.06	0.0249407	12.0019	3	34	0.0882353	174.457	0.0286354	3.02864	TRUE	FALSE	199	78	39.018
F:\25-03-2022\20220324-TEST BROTH-POS-00.d	4056	scanId=2333702		38.8949	373.214	5614.82	2	744.414	84	7456.78	R.TISAEPK.F	TISAEPK	DECOY_WP_036160811.1 MULTISPECIES: S-layer homology domain-containing protein [Lysinibacillus]	135	141	0	744.402	0.012079	16.2265	3	12	0.25	211.4	0.02835	3.02835	FALSE	TRUE	199	79	39.3206
F:\25-03-2022\20220324-TEST BROTH-POS-00.d	4123	scanId=2369259		39.4875	1026.51	2830.58	2	2051.02	132	9891.03	R.VRDYAQVLGDGM(oxidation of M)ITEGIAK.Q	VRDYAQVLGDGMITEGIAK	WP_036162238.1 MULTISPECIES: Holliday junction branch migration DNA helicase RuvB [Lysinibacillus]	228	246	1	2051.04	-0.0204179	-9.95491	3	36	0.0833333	278.601	0.028167	3.02817	TRUE	FALSE	200	79	39.3206
F:\25-03-2022\20220324-TEST BROTH-POS-00.d	3383	scanId=1949218		32.4868	708.907	1106.82	2	1415.8	67	4674.49	K.SLTLVEGEKTLVK.S	SLTLVEGEKTLVK	DECOY_WP_012295816.1 MULTISPECIES: UDP-N-acetylmuramate dehydrogenase [Lysinibacillus]	139	151	1	1415.82	-0.0236348	-16.6933	3	24	0.125	131.208	0.0280688	3.02807	FALSE	TRUE	200	80	39.3327
F:\25-03-2022\20220324-TEST BROTH-POS-00.d	1723	scanId=966976		16.1161	307.698	812.844	2	613.382	42	2682.85	K.VTLGPK.G	VTLGPK	WP_126659346.1 MULTISPECIES: chaperonin GroEL [Lysinibacillus]	28	33	0	613.38	0.00242325	3.95065	3	10	0.3	74.2263	0.027667	3.02767	TRUE	FALSE	201	80	39.3327
F:\25-03-2022\20220324-TEST BROTH-POS-00.d	4718	scanId=2670368		44.506	652.873	6975.33	2	1303.73	146	15773.9	K.VKTGEVAAGFGLR.I	VKTGEVAAGFGLR	WP_036226253.1 MULTISPECIES: extracellular solute-binding protein [Lysinibacillus]	213	225	1	1303.72	0.00696409	5.34168	3	24	0.125	435.372	0.0276007	3.0276	TRUE	FALSE	202	80	39.3327
F:\25-03-2022\20220324-TEST BROTH-POS-00.d	5018	scanId=2830077		47.1678	798.929	3013.48	2	1595.84	219	15360	R.TSVIAKYDLSNETR.Q	TSVIAKYDLSNETR	DECOY_WP_069513748.1 MULTISPECIES: pyruvate kinase [Lysinibacillus]	241	254	1	1595.82	0.0280637	17.5858	3	26	0.115385	423.132	0.0275476	3.02755	FALSE	TRUE	202	81	39.3327
F:\25-03-2022\20220324-TEST BROTH-POS-00.d	4208	scanId=2411785		40.1963	867.434	4099.5	2	1732.85	110	9654.13	K.NLDTTATNKLDDPSTK.Y	NLDTTATNKLDDPSTK	WP_012295138.1 MULTISPECIES: hypothetical protein [Lysinibacillus]	366	381	1	1732.85	0.00628344	3.62608	3	30	0.1	253.358	0.0262435	3.02624	TRUE	FALSE	203	81	39.3327
F:\25-03-2022\20220324-TEST BROTH-POS-00.d	5323	scanId=3009234		50.1538	1081.56	1011.91	2	2161.11	86	4900.47	K.QMESILQARASLQRNM(oxidation of M)NR.T	QMESILQARASLQRNMNR	WP_012291863.1 MULTISPECIES: DNA polymerase III subunit delta' [Lysinibacillus]	299	316	2	2161.08	0.0291085	13.4694	3	34	0.0882353	123.469	0.0251952	3.0252	TRUE	FALSE	204	81	39.3327
F:\25-03-2022\20220324-TEST BROTH-POS-00.d	5034	scanId=2839101		47.3182	804.487	4208.3	2	1606.96	163	13693.4	K.LPNGTLRILVEGVAR.A	LPNGTLRILVEGVAR	WP_031419316.1 MULTISPECIES: endopeptidase La [Lysinibacillus]	82	96	1	1606.95	0.00738808	4.59758	3	28	0.107143	322.181	0.0235282	3.02353	TRUE	FALSE	205	81	39.3327
F:\25-03-2022\20220324-TEST BROTH-POS-00.d	2861	scanId=1641798		27.3632	555.831	1827.53	2	1109.65	78	6193.73	R.IGGGIPTTLPGK.I	IGGGIPTTLPGK	DECOY_WP_031418629.1 MULTISPECIES: NADP-dependent isocitrate dehydrogenase [Lysinibacillus]	322	333	0	1109.64	0.00398686	3.59292	3	22	0.136364	135.34	0.0218512	3.02185	FALSE	TRUE	205	82	39.8183
F:\25-03-2022\20220324-TEST BROTH-POS-00.d	3714	scanId=2144225		35.737	802.409	938.682	2	1602.8	72	5423.84	R.EESNDLKITIEGQK.T	EESNDLKITIEGQK	DECOY_WP_012294060.1 MULTISPECIES: Ger(x)C family spore germination protein [Lysinibacillus]	130	143	1	1602.81	-0.00710085	-4.43025	3	26	0.115385	116.586	0.021495	3.0215	FALSE	TRUE	205	83	40.3039
F:\25-03-2022\20220324-TEST BROTH-POS-00.d	5430	scanId=3073627		51.227	1230.63	698.809	2	2459.25	105	6295.2	R.GGKAGM(oxidation of M)GAC[carbamidomethylation of C]LGTLTAVSLM(oxidation of M)GTFSLK.A	GGKAGMGACLGTLTAVSLMGTFSLK	DECOY_WP_012291893.1 MULTISPECIES: SpoIIE family protein phosphatase [Lysinibacillus]	539	563	1	2459.22	0.0284164	11.555	3	48	0.0625	134.381	0.0213466	3.02135	FALSE	TRUE	205	84	40.7895
F:\25-03-2022\20220324-TEST BROTH-POS-00.d	4886	scanId=2757500		45.9582	726.9	2663.72	2	1451.79	94	6895.71	K.NIFTFIPIGRM(oxidation of M)K.C	NIFTFIPIGRMK	DECOY_WP_012293015.1 MULTISPECIES: peptide chain release factor 3 [Lysinibacillus]	386	397	1	1451.8	-0.0103866	-7.15433	3	22	0.136364	142.961	0.0207319	3.02073	FALSE	TRUE	205	85	41.2751
F:\25-03-2022\20220324-TEST BROTH-POS-00.d	4404	scanId=2510594		41.8431	628.384	2629.28	2	1254.75	114	8313.93	K.YKQFLTKTVK.N	YKQFLTKTVK	DECOY_WP_012293743.1 MULTISPECIES: endonuclease III [Lysinibacillus]	163	172	2	1254.73	0.0203165	16.1919	3	18	0.166667	155.025	0.0186464	3.01865	FALSE	TRUE	205	86	41.3572
F:\25-03-2022\20220324-TEST BROTH-POS-00.d	3457	scanId=1994210		33.2367	543.816	922.314	2	1085.62	66	9081.64	R.EVNVTKQLR.D	EVNVTKQLR	WP_012292899.1 MULTISPECIES: flagellar hook-associated protein FlgL [Lysinibacillus]	251	259	1	1085.62	-0.00134859	-1.24223	3	16	0.1875	163.404	0.0179927	3.01799	TRUE	FALSE	206	86	41.3572
F:\25-03-2022\20220324-TEST BROTH-POS-00.d	4552	scanId=2585267		43.0876	630.862	2043.11	2	1259.71	125	11411.5	R.TAQTTAIKGIEK.V	TAQTTAIKGIEK	WP_031417481.1 MULTISPECIES: (2Fe-2S) ferredoxin domain-containing protein [Lysinibacillus]	108	119	1	1259.71	0.00127562	1.01263	3	22	0.136364	201.062	0.0176192	3.01762	TRUE	FALSE	207	86	41.3572
F:\25-03-2022\20220324-TEST BROTH-POS-00.d	4609	scanId=2613163		43.5526	630.861	11779.9	2	1259.71	146	14660.9	K.LLTGVSEVLSSR.I	LLTGVSEVLSSR	DECOY_WP_036162287.1 MULTISPECIES: aspartate kinase [Lysinibacillus]	170	181	0	1259.71	-0.00184021	-1.46082	3	22	0.136364	245.077	0.0167164	3.01672	FALSE	TRUE	207	87	41.4377
F:\25-03-2022\20220324-TEST BROTH-POS-00.d	4970	scanId=2803787		46.7296	738.448	16773.6	2	1474.88	204	19683.3	M.VVTMRPLKIKYK.K	VVTMRPLKIKYK	WP_012292041.1 MULTISPECIES: serine protease [Lysinibacillus]	2	13	2	1474.91	-0.0236091	-16.0072	3	22	0.136364	327.582	0.0166426	3.01664	TRUE	FALSE	208	87	41.4377
F:\25-03-2022\20220324-TEST BROTH-POS-00.d	3365	scanId=1939188		32.3197	821.421	489.211	2	1640.83	49	3380.43	K.SASTGKYEKM(oxidation of M)DIPAK.G	SASTGKYEKMDIPAK	WP_036160615.1 MULTISPECIES: HAMP domain-containing histidine kinase [Lysinibacillus]	172	186	2	1640.81	0.0198924	12.1235	3	28	0.107143	54.5291	0.0161308	3.01613	TRUE	FALSE	209	87	41.4377
F:\25-03-2022\20220324-TEST BROTH-POS-00.d	4515	scanId=2566617		42.7768	628.383	5776.7	2	1254.75	159	13876.9	K.AKVTLRNGQIR.I	AKVTLRNGQIR	DECOY_WP_012295369.1 MULTISPECIES: DNA internalization-related competence protein ComEC/Rec2 [Lysinibacillus]	9	19	2	1254.75	-0.00140318	-1.11829	3	20	0.15	199.438	0.0143719	3.01437	FALSE	TRUE	209	88	41.914
F:\25-03-2022\20220324-TEST BROTH-POS-00.d	4645	scanId=2632175		43.8695	650.396	12624.4	2	1298.78	235	26278.8	R.GSLIKNVNITIK.S	GSLIKNVNITIK	DECOY_WP_227256835.1 MULTISPECIES: Ger(x)C family spore germination protein [Lysinibacillus]	12	23	1	1298.79	-0.0146298	-11.2642	3	22	0.136364	359.103	0.0136651	3.01367	FALSE	TRUE	209	89	42.1885
F:\25-03-2022\20220324-TEST BROTH-POS-00.d	4804	scanId=2714304		45.2383	672.409	10282.4	2	1342.8	182	18845.2	K.VAKELGSNVTVVK.A	VAKELGSNVTVVK	WP_025113922.1 MULTISPECIES: ADP-forming succinate--CoA ligase subunit beta [Lysinibacillus]	34	46	1	1342.78	0.021775	16.2164	3	24	0.125	254.423	0.0135007	3.0135	TRUE	FALSE	210	89	42.1885
F:\25-03-2022\20220324-TEST BROTH-POS-00.d	4716	scanId=2668984		44.4829	1038.04	4585.53	2	2074.06	174	11352.1	-.M(oxidation of M)FVDGFYEKASRLGAVLR.D	MFVDGFYEKASRLGAVLR	DECOY_WP_012292331.1 MULTISPECIES: cysteine desulfurase [Lysinibacillus]	1	18	2	2074.07	-0.00768329	-3.70446	3	34	0.0882353	149.458	0.0131657	3.01317	FALSE	TRUE	210	90	42.529
F:\25-03-2022\20220324-TEST BROTH-POS-00.d	2703	scanId=1548285		25.8046	657.853	901.623	2	1313.69	63	5378.48	R.KAVEGVQREGNK.F	KAVEGVQREGNK	DECOY_WP_012295327.1 MULTISPECIES: molecular chaperone DnaK [Lysinibacillus]	559	570	2	1313.71	-0.0129042	-9.82275	3	22	0.136364	64.5461	0.0120008	3.012	FALSE	TRUE	210	91	42.529
F:\25-03-2022\20220324-TEST BROTH-POS-00.d	4699	scanId=2659798		44.3298	696.902	5486	2	1391.79	171	15950.6	R.TVGKSIDEIFRK.V	TVGKSIDEIFRK	WP_012293081.1 MULTISPECIES: ribonuclease J1 [Lysinibacillus]	210	221	2	1391.78	0.0118664	8.5261	3	22	0.136364	187.312	0.0117432	3.01174	TRUE	FALSE	211	91	42.529
F:\25-03-2022\20220324-TEST BROTH-POS-00.d	6613	scanId=3755024		62.5836	601.874	4554.01	2	1201.73	313	36531.4	K.INLPIIIHNR.D	INLPIIIHNR	WP_036160348.1 MULTISPECIES: TatD family hydrolase [Lysinibacillus]	121	130	0	1201.73	0.00428599	3.56652	3	18	0.166667	422.812	0.0115739	3.01157	TRUE	FALSE	212	91	42.529
F:\25-03-2022\20220324-TEST BROTH-POS-00.d	6690	scanId=3798382		63.3062	490.227	4006.19	2	978.438	214	22573.4	R.GEKTMEER.L	GEKTMEER	WP_155593039.1 MULTISPECIES: 30S ribosomal protein S7 [Lysinibacillus]	112	119	1	978.444	-0.00554773	-5.66995	3	14	0.214286	255.83	0.0113333	3.01133	TRUE	FALSE	213	91	42.529
F:\25-03-2022\20220324-TEST BROTH-POS-00.d	4817	scanId=2721633		45.3604	696.901	12240.1	2	1391.79	158	20672.9	K.M(oxidation of M)AAHILATNPLPK.I	MAAHILATNPLPK	DECOY_WP_036160453.1 MULTISPECIES: metal-dependent hydrolase [Lysinibacillus]	82	94	0	1391.76	0.0277792	19.9598	3	24	0.125	203.537	0.00984559	3.00985	FALSE	TRUE	213	92	42.86
F:\25-03-2022\20220324-TEST BROTH-POS-00.d	4803	scanId=2713976		45.2328	694.421	15757.5	2	1386.83	254	25733.9	R.LVAVIEEFLARK.R	LVAVIEEFLARK	DECOY_WP_012295608.1 MULTISPECIES: bifunctional DNA-formamidopyrimidine glycosylase/DNA-(apurinic or apyrimidinic site) lyase [Lysinibacillus]	63	74	1	1386.82	0.00455278	3.28289	3	22	0.136364	226.063	0.00878466	3.00878	FALSE	TRUE	213	93	42.86
F:\25-03-2022\20220324-TEST BROTH-POS-00.d	4381	scanId=2499421		41.6569	586.835	5129.01	2	1171.65	131	16643.4	R.QQIKDQWVK.A	QQIKDQWVK	WP_012292240.1 MULTISPECIES: S9 family peptidase [Lysinibacillus]	67	75	1	1171.63	0.0195903	16.7205	3	16	0.1875	139.804	0.00839993	3.0084	TRUE	FALSE	214	93	42.86
F:\25-03-2022\20220324-TEST BROTH-POS-00.d	4565	scanId=2591747		43.1957	650.396	9793.64	2	1298.78	180	17697.1	K.VNLQRTKEIAK.A	VNLQRTKEIAK	WP_012295436.1 MULTISPECIES: indole-3-glycerol phosphate synthase TrpC [Lysinibacillus]	192	202	2	1298.77	0.00980115	7.5465	3	20	0.15	132.796	0.00750382	3.0075	TRUE	FALSE	215	93	42.86
F:\25-03-2022\20220324-TEST BROTH-POS-00.d	4616	scanId=2616928		43.6153	672.411	9921.68	2	1342.81	225	24075.6	K.VAKELGSNVTVVK.A	VAKELGSNVTVVK	WP_025113922.1 MULTISPECIES: ADP-forming succinate--CoA ligase subunit beta [Lysinibacillus]	34	46	1	1342.78	0.0258232	19.2311	3	24	0.125	170.313	0.00707411	3.00707	TRUE	FALSE	216	93	42.86
F:\25-03-2022\20220324-TEST BROTH-POS-00.d	4664	scanId=2641984		44.0329	652.874	15692.2	2	1303.73	167	22513.8	R.VILLKISM(oxidation of M)DTR.L	VILLKISMDTR	DECOY_WP_012292673.1 MULTISPECIES: enoyl-CoA hydratase-related protein [Lysinibacillus]	208	218	1	1303.75	-0.0195003	-14.957	3	20	0.15	156.99	0.00697303	3.00697	FALSE	TRUE	216	94	43.1212
F:\25-03-2022\20220324-TEST BROTH-POS-00.d	5051	scanId=2848600		47.4765	762.938	2150.06	2	1523.86	115	7695.91	K.QIVADLQEAGVLIR.I	QIVADLQEAGVLIR	WP_012295476.1 MULTISPECIES: valine--tRNA ligase [Lysinibacillus]	324	337	0	1523.87	-0.00651343	-4.27427	3	26	0.115385	52.9422	0.00687926	3.00688	TRUE	FALSE	217	94	43.1212
F:\25-03-2022\20220324-TEST BROTH-POS-00.d	4221	scanId=2419150		40.319	542.808	10171.1	2	1083.6	165	20777.2	K.FFQQLFVR.K	FFQQLFVR	DECOY_WP_012292841.1 MULTISPECIES: tyrosine-type recombinase/integrase [Lysinibacillus]	474	481	0	1083.59	0.0152764	14.098	3	14	0.214286	136.77	0.00658271	3.00658	FALSE	TRUE	217	95	43.58
F:\25-03-2022\20220324-TEST BROTH-POS-00.d	6865	scanId=3896419		64.9402	927.487	2714.96	2	1852.96	248	16347.3	K.DFVRGTHDDLEIPIAR.Q	DFVRGTHDDLEIPIAR	DECOY_WP_012293208.1 MULTISPECIES: methionyl-tRNA formyltransferase [Lysinibacillus]	148	163	1	1852.94	0.0155543	8.39435	3	30	0.1	105.232	0.00643726	3.00644	FALSE	TRUE	217	96	44.0387
F:\25-03-2022\20220324-TEST BROTH-POS-00.d	6390	scanId=3626099		60.4348	726.955	7438.67	2	1451.9	358	35834.1	K.VTVQITSAHKLKK.Q	VTVQITSAHKLKK	DECOY_WP_031417875.1 MULTISPECIES: Ohr family peroxiredoxin [Lysinibacillus]	58	70	2	1451.88	0.0140138	9.65218	3	24	0.125	215.465	0.00601285	3.00601	FALSE	TRUE	217	97	44.1026
F:\25-03-2022\20220324-TEST BROTH-POS-00.d	6553	scanId=3720760		62.0125	571.36	4012.44	2	1140.7	310	35183.5	K.VAGVLEGIQKK.H	VAGVLEGIQKK	DECOY_WP_012292260.1 MULTISPECIES: SsrA-binding protein SmpB [Lysinibacillus]	59	69	1	1140.69	0.0179651	15.7494	3	20	0.15	63.5387	0.00180593	3.00181	FALSE	TRUE	217	98	44.1026
F:\25-03-2022\20220324-TEST BROTH-POS-00.d	3846	scanId=2218721		36.9785	998.538	1260.07	2	1995.06	45	4429.44	K.ELLREPLM(oxidation of M)AAHKSLTDR.E	ELLREPLMAAHKSLTDR	WP_031419855.1 MULTISPECIES: dipeptide/oligopeptide/nickel ABC transporter ATP-binding protein [Lysinibacillus]	98	114	2	1995.06	0.00427737	2.14398	2	32	0.0625	1065.72	0.240599	2.2406	TRUE	FALSE	218	98	44.1026
F:\25-03-2022\20220324-TEST BROTH-POS-00.d	5006	scanId=2823761		47.0626	765.417	1957.41	2	1528.82	73	6035.87	K.EHIQRTFEVDKK.S	EHIQRTFEVDKK	DECOY_WP_012295626.1 MULTISPECIES: GntR family transcriptional regulator [Lysinibacillus]	108	119	2	1528.8	0.018947	12.3934	2	22	0.0909091	1247.24	0.206639	2.20664	FALSE	TRUE	218	99	44.1026
F:\25-03-2022\20220324-TEST BROTH-POS-00.d	4035	scanId=2322506		38.7083	476.769	2362.86	2	951.524	85	8466.63	K.RHGQVLDK.V	RHGQVLDK	WP_012295261.1 MULTISPECIES: TrkA family potassium uptake protein [Lysinibacillus]	105	112	1	951.525	-0.00119002	-1.25065	2	14	0.142857	1736.61	0.205113	2.20511	TRUE	FALSE	219	99	44.1026
F:\25-03-2022\20220324-TEST BROTH-POS-00.d	1754	scanId=985428		16.4237	360.182	1181.02	2	718.35	24	2487.24	K.APGFGDR.R	APGFGDR	WP_126659346.1 MULTISPECIES: chaperonin GroEL [Lysinibacillus]	276	282	0	718.34	0.0105597	14.7001	2	12	0.166667	475.131	0.191027	2.19103	TRUE	FALSE	220	99	44.1026
F:\25-03-2022\20220324-TEST BROTH-POS-00.d	1478	scanId=819114		13.6518	552.289	586	2	1102.56	38	3043.99	K.QAC[carbamidomethylation of C]LDNAALK.K	QACLDNAALK	WP_031418618.1 MULTISPECIES: alanine dehydrogenase [Lysinibacillus]	331	340	0	1102.54	0.0184535	16.7372	2	18	0.111111	547.724	0.179936	2.17994	TRUE	FALSE	221	99	44.1026
F:\25-03-2022\20220324-TEST BROTH-POS-00.d	3089	scanId=1776034		29.6004	606.335	875.485	2	1210.65	50	2873.12	K.AVNPDIDIQVK.Y	AVNPDIDIQVK	WP_012293320.1 MULTISPECIES: BMP family protein [Lysinibacillus]	199	209	0	1210.66	-0.000852056	-0.703797	2	20	0.1	473.879	0.164935	2.16494	TRUE	FALSE	222	99	44.1026
F:\25-03-2022\20220324-TEST BROTH-POS-00.d	567	scanId=305267		5.08765	490.25	949.647	2	978.486	54	4364.14	K.KDM(oxidation of M)VDIDK.V	KDMVDIDK	DECOY_WP_202341663.1 MULTISPECIES: ribosome maturation factor RimM [Lysinibacillus]	13	20	1	978.469	0.0163247	16.6839	2	14	0.142857	713.021	0.163382	2.16338	FALSE	TRUE	222	100	44.1026
F:\25-03-2022\20220324-TEST BROTH-POS-00.d	1912	scanId=1078083		17.9679	664.809	923.004	2	1327.6	28	2283.07	K.AIKM(oxidation of M)AEGM(oxidation of M)NM(oxidation of M)GK.E	AIKMAEGMNMGK	DECOY_WP_031417061.1 MULTISPECIES: GatB/YqeY domain-containing protein [Lysinibacillus]	24	35	1	1327.59	0.0104171	7.84661	2	22	0.0909091	362.712	0.15887	2.15887	FALSE	TRUE	222	101	44.1026
F:\25-03-2022\20220324-TEST BROTH-POS-00.d	1730	scanId=971076		16.1845	351.692	1211.11	2	701.37	34	2208.32	K.LEVDAR.A	LEVDAR	DECOY_WP_012292296.1 MULTISPECIES: S-layer homology domain-containing protein [Lysinibacillus]	190	195	0	701.371	-0.000698584	-0.996027	2	10	0.2	340.684	0.154273	2.15427	FALSE	TRUE	222	102	44.1026
F:\25-03-2022\20220324-TEST BROTH-POS-00.d	3097	scanId=1780466		29.6743	788.897	806.255	2	1575.78	42	2878.61	K.YSPEQLADVAENIK.A	YSPEQLADVAENIK	WP_012292187.1 MULTISPECIES: HIT family protein [Lysinibacillus]	121	134	0	1575.78	0.00239304	1.51864	2	26	0.0769231	443.798	0.154171	2.15417	TRUE	FALSE	223	102	44.1026
F:\25-03-2022\20220324-TEST BROTH-POS-00.d	2575	scanId=1472105		24.5349	704.833	728.384	2	1407.65	41	2022.06	K.EEPYWLEVTDK.L	EEPYWLEVTDK	WP_227256872.1 MULTISPECIES: sensor domain-containing diguanylate cyclase [Lysinibacillus]	100	110	0	1407.66	-0.00458815	-3.25943	2	20	0.1	311.271	0.153938	2.15394	TRUE	FALSE	224	102	44.1026
F:\25-03-2022\20220324-TEST BROTH-POS-00.d	3247	scanId=1869934		31.1654	494.774	1070.07	2	987.533	46	3382.74	K.TAKKQQER.Q	TAKKQQER	DECOY_WP_179965997.1 MULTISPECIES: penicillin-binding protein 1A [Lysinibacillus]	860	867	2	987.546	-0.0126885	-12.8485	2	14	0.142857	520.714	0.153932	2.15393	FALSE	TRUE	224	103	44.1026
F:\25-03-2022\20220324-TEST BROTH-POS-00.d	3318	scanId=1911102		31.8516	820.397	448.917	2	1638.78	34	2529.62	K.NQKFPFSDQQC[carbamidomethylation of C]IK.D	NQKFPFSDQQCIK	WP_031418899.1 MULTISPECIES: UDP-N-acetylmuramoyl-L-alanyl-D-glutamate--2,6-diaminopimelate ligase [Lysinibacillus]	466	478	1	1638.78	-0.0031089	-1.89708	2	24	0.0833333	376.917	0.149001	2.149	TRUE	FALSE	225	103	44.1026
F:\25-03-2022\20220324-TEST BROTH-POS-00.d	2527	scanId=1445402		24.0899	658.342	337.087	2	1314.67	33	1940.24	R.SFHDKC[carbamidomethylation of C]LPALK.A	SFHDKCLPALK	WP_012294172.1 MULTISPECIES: collagenase [Lysinibacillus]	188	198	1	1314.68	-0.005192	-3.94926	2	20	0.1	280.551	0.144596	2.1446	TRUE	FALSE	226	103	44.1026
F:\25-03-2022\20220324-TEST BROTH-POS-00.d	3698	scanId=2134806		35.58	457.24	1138.81	2	912.465	55	4651	K.VVEEFYK.D	VVEEFYK	WP_016994084.1 MULTISPECIES: type I DNA topoisomerase [Lysinibacillus]	547	553	0	912.459	0.00530344	5.81225	2	12	0.166667	669.124	0.143867	2.14387	TRUE	FALSE	227	103	44.1026
F:\25-03-2022\20220324-TEST BROTH-POS-00.d	3290	scanId=1895033		31.5837	968.022	1098.45	2	1934.03	51	3469.02	R.QLNTPSLDIMLQHGLVR.E	QLNTPSLDIMLQHGLVR	WP_012295849.1 MULTISPECIES: SAM-dependent methyltransferase [Lysinibacillus]	292	308	0	1934.04	-0.0106091	-5.48548	2	32	0.0625	469.082	0.13522	2.13522	TRUE	FALSE	228	103	44.1026
F:\25-03-2022\20220324-TEST BROTH-POS-00.d	2521	scanId=1442185		24.0363	623.818	1003.12	2	1245.62	43	3459.22	K.VIM(oxidation of M)ASKHSTEK.I	VIMASKHSTEK	DECOY_WP_012292623.1 MULTISPECIES: saccharopine dehydrogenase NADP-binding domain-containing protein [Lysinibacillus]	4	14	1	1245.64	-0.0175085	-14.0559	2	20	0.1	465.309	0.134513	2.13451	FALSE	TRUE	228	104	44.1026
F:\25-03-2022\20220324-TEST BROTH-POS-00.d	2039	scanId=1153935		19.2321	446.734	727.997	2	891.453	49	3686.89	K.KVM(oxidation of M)DDIR.Q	KVMDDIR	WP_012295150.1 MULTISPECIES: hypothetical protein [Lysinibacillus]	135	141	1	891.448	0.00450639	5.05513	2	12	0.166667	484.699	0.131466	2.13147	TRUE	FALSE	229	104	44.1026
F:\25-03-2022\20220324-TEST BROTH-POS-00.d	2329	scanId=1327230		22.1204	486.79	595.793	2	971.566	44	3765.66	K.ALKDKGVLE.-	ALKDKGVLE	WP_031418107.1 MULTISPECIES: CoA transferase [Lysinibacillus]	386	394	2	971.565	0.000421213	0.433541	2	16	0.125	485.554	0.128943	2.12894	TRUE	FALSE	230	104	44.1026
F:\25-03-2022\20220324-TEST BROTH-POS-00.d	2492	scanId=1425570		23.7594	688.848	613.231	2	1375.68	32	1900.86	K.QFGAQRRASEAR.A	QFGAQRRASEAR	WP_012291949.1 MULTISPECIES: DUF4132 domain-containing protein [Lysinibacillus]	1248	1259	2	1375.71	-0.0250759	-18.2277	2	22	0.0909091	245.043	0.128912	2.12891	TRUE	FALSE	231	104	44.1026
F:\25-03-2022\20220324-TEST BROTH-POS-00.d	2621	scanId=1499693		24.9947	609.309	482.002	2	1216.6	29	1500.88	R.AGDDAAGLAISEK.M	AGDDAAGLAISEK	WP_155591959.1 MULTISPECIES: flagellin Hag [Lysinibacillus]	39	51	0	1216.59	0.0101093	8.30952	2	24	0.0833333	192.573	0.128307	2.12831	TRUE	FALSE	232	104	44.1026
F:\25-03-2022\20220324-TEST BROTH-POS-00.d	2138	scanId=1212827		20.2137	468.743	1017.96	2	935.471	39	3366.87	K.SAELFNQK.G	SAELFNQK	WP_036161480.1 MULTISPECIES: TetR/AcrR family transcriptional regulator [Lysinibacillus]	15	22	0	935.471	4.84036e-05	0.0517424	2	14	0.142857	431.958	0.128297	2.1283	TRUE	FALSE	233	104	44.1026
F:\25-03-2022\20220324-TEST BROTH-POS-00.d	3321	scanId=1912985		31.883	522.299	2589.49	2	1042.58	55	5154.3	K.QVSLLDNVR.M	QVSLLDNVR	WP_227256907.1 MULTISPECIES: NEAT domain-containing protein [Lysinibacillus]	233	241	0	1042.58	0.00715609	6.86385	2	16	0.125	651.509	0.126401	2.1264	TRUE	FALSE	234	104	44.1026
F:\25-03-2022\20220324-TEST BROTH-POS-00.d	3566	scanId=2060748		34.3457	443.259	1206.27	2	884.504	48	4439.68	R.QGGSLAKPK.R	QGGSLAKPK	DECOY_WP_012292993.1 MULTISPECIES: sn-glycerol-3-phosphate ABC transporter ATP-binding protein UgpC [Lysinibacillus]	228	236	0	884.508	-0.00356973	-4.03584	2	16	0.125	542.388	0.122168	2.12217	FALSE	TRUE	234	105	44.1026
F:\25-03-2022\20220324-TEST BROTH-POS-00.d	6817	scanId=3870517		64.5085	978.94	2108.8	2	1955.86	93	7537.1	K.VEHYESFSDFDELIAR.A	VEHYESFSDFDELIAR	WP_012295643.1 MULTISPECIES: tRNA 4-thiouridine(8) synthase ThiI [Lysinibacillus]	363	378	0	1955.89	-0.0254072	-12.9901	2	30	0.0666667	890.372	0.118132	2.11813	TRUE	FALSE	235	105	44.1026
F:\25-03-2022\20220324-TEST BROTH-POS-00.d	3843	scanId=2217004		36.9499	740.385	995.587	2	1478.76	53	4211.23	R.IKQLEMENAYLK.K	IKQLEMENAYLK	WP_012293488.1 MULTISPECIES: IS3 family transposase [Lysinibacillus]	142	153	1	1478.78	-0.0250893	-16.9662	2	22	0.0909091	490.699	0.116521	2.11652	TRUE	FALSE	236	105	44.1026
F:\25-03-2022\20220324-TEST BROTH-POS-00.d	3469	scanId=2001027		33.3503	614.344	782.615	2	1226.67	52	3301.92	K.ESVVSVSVFFK.K	ESVVSVSVFFK	WP_108030684.1 MULTISPECIES: GGDEF domain-containing protein [Lysinibacillus]	89	99	0	1226.65	0.0194182	15.8302	2	20	0.1	378.268	0.11456	2.11456	TRUE	FALSE	237	105	44.1026
F:\25-03-2022\20220324-TEST BROTH-POS-00.d	2659	scanId=1522683		25.3779	682.349	863.21	2	1362.68	49	2892.5	R.DIKLC[carbamidomethylation of C]DIPFDK.L	DIKLCDIPFDK	DECOY_WP_227256899.1 MULTISPECIES: EAL domain-containing protein [Lysinibacillus]	95	105	1	1362.69	-0.00238064	-1.74702	2	20	0.1	314.009	0.10856	2.10856	FALSE	TRUE	237	106	44.5226
F:\25-03-2022\20220324-TEST BROTH-POS-00.d	550	scanId=295620		4.92687	489.267	696.676	2	976.52	53	3462.64	K.LFNNASRR.K	LFNNASRR	DECOY_WP_012291958.1 MULTISPECIES: nitroreductase family protein [Lysinibacillus]	190	197	1	976.52	-0.000539676	-0.552652	2	14	0.142857	368.068	0.106297	2.1063	FALSE	TRUE	237	107	44.5665
F:\25-03-2022\20220324-TEST BROTH-POS-00.d	554	scanId=298003		4.96658	504.272	872.672	2	1006.53	49	3871.37	-.M(oxidation of M)SIREDIK.K	MSIREDIK	WP_031416518.1 MULTISPECIES: MurR/RpiR family transcriptional regulator [Lysinibacillus]	1	8	1	1006.51	0.0176112	17.4972	2	14	0.142857	411.268	0.106233	2.10623	TRUE	FALSE	238	107	44.5665
F:\25-03-2022\20220324-TEST BROTH-POS-00.d	3046	scanId=1750712		29.1784	683.318	483.541	2	1364.62	31	1810.13	R.DFGRGM(oxidation of M)PTGM(oxidation of M)HK.M	DFGRGMPTGMHK	WP_031416030.1 MULTISPECIES: DNA topoisomerase IV subunit B [Lysinibacillus]	77	88	1	1364.6	0.0241892	17.7262	2	22	0.0909091	190.934	0.105481	2.10548	TRUE	FALSE	239	107	44.5665
F:\25-03-2022\20220324-TEST BROTH-POS-00.d	766	scanId=415074		6.91777	618.315	351.881	2	1234.61	26	1523.99	K.GEMSAFILDPR.D	GEMSAFILDPR	DECOY_WP_036225924.1 MULTISPECIES: preprotein translocase subunit SecA [Lysinibacillus]	425	435	0	1234.6	0.0133709	10.8302	2	20	0.1	158.495	0.104	2.104	FALSE	TRUE	239	108	44.983
F:\25-03-2022\20220324-TEST BROTH-POS-00.d	2498	scanId=1429003		23.8166	479.295	1112.62	2	956.575	45	4359.94	R.KELNAKVR.N	KELNAKVR	DECOY_WP_031416728.1 MULTISPECIES: transcription termination/antitermination protein NusG [Lysinibacillus]	155	162	2	956.577	-0.00149674	-1.56468	2	14	0.142857	450.005	0.103214	2.10321	FALSE	TRUE	239	109	45.3995
F:\25-03-2022\20220324-TEST BROTH-POS-00.d	3863	scanId=2228857		37.1475	449.791	1051.6	2	897.568	65	6919.92	K.LLVPTSIR.E	LLVPTSIR	DECOY_WP_206701028.1 MULTISPECIES: Ger(x)C family spore germination protein [Lysinibacillus]	173	180	0	897.565	0.00277532	3.09206	2	14	0.142857	712.476	0.10296	2.10296	FALSE	TRUE	239	110	45.6594
F:\25-03-2022\20220324-TEST BROTH-POS-00.d	3810	scanId=2198339		36.6388	718.348	881.156	2	1434.68	58	3664.14	K.EEQSIAGQDAM(oxidation of M)LK.L	EEQSIAGQDAMLK	DECOY_WP_012292711.1 MULTISPECIES: PBP1A family penicillin-binding protein [Lysinibacillus]	439	451	0	1434.67	0.0150837	10.5138	2	24	0.0833333	371.647	0.101428	2.10143	FALSE	TRUE	239	111	45.6594
F:\25-03-2022\20220324-TEST BROTH-POS-00.d	3871	scanId=2233122		37.2186	998.535	631.024	2	1995.05	36	2334.43	K.ELLREPLM(oxidation of M)AAHKSLTDR.E	ELLREPLMAAHKSLTDR	WP_031419855.1 MULTISPECIES: dipeptide/oligopeptide/nickel ABC transporter ATP-binding protein [Lysinibacillus]	98	114	2	1995.06	-0.00264744	-1.327	2	32	0.0625	230.014	0.0985309	2.09853	TRUE	FALSE	240	111	45.6594
F:\25-03-2022\20220324-TEST BROTH-POS-00.d	1608	scanId=897096		14.9515	373.22	918.009	2	744.425	39	3336.42	R.VTGLDLK.K	VTGLDLK	WP_012295849.1 MULTISPECIES: SAM-dependent methyltransferase [Lysinibacillus]	210	216	0	744.438	-0.0127266	-17.0956	2	12	0.166667	328.515	0.0984632	2.09846	TRUE	FALSE	241	111	45.6594
F:\25-03-2022\20220324-TEST BROTH-POS-00.d	3032	scanId=1742175		29.0361	700.381	619.556	2	1398.75	44	3010.27	R.QIEEALEQQRR.Q	QIEEALEQQRR	WP_012291937.1 MULTISPECIES: twin-arginine translocase subunit TatC [Lysinibacillus]	256	266	1	1398.72	0.0261142	18.6701	2	20	0.1	293.089	0.0973632	2.09736	TRUE	FALSE	242	111	45.6594
F:\25-03-2022\20220324-TEST BROTH-POS-00.d	1348	scanId=743297		12.3881	372.227	324.355	2	742.44	23	2096.77	R.EPKLTR.E	EPKLTR	DECOY_WP_052059793.1 MULTISPECIES: helix-turn-helix domain-containing protein [Lysinibacillus]	64	69	1	742.434	0.00632266	8.51612	2	10	0.2	202.926	0.0967803	2.09678	FALSE	TRUE	242	112	46.0708
F:\25-03-2022\20220324-TEST BROTH-POS-00.d	2380	scanId=1359141		22.6522	588.804	541.338	2	1175.59	32	2168.08	R.MDTVRLDAQK.E	MDTVRLDAQK	DECOY_WP_036160430.1 MULTISPECIES: C39 family peptidase [Lysinibacillus]	100	109	1	1175.6	-0.00273916	-2.33001	2	18	0.111111	204.608	0.0943726	2.09437	FALSE	TRUE	242	113	46.4821
F:\25-03-2022\20220324-TEST BROTH-POS-00.d	3328	scanId=1916917		31.9485	588.818	680.515	2	1175.62	41	2427.82	K.SFPKHFTQGK.L	SFPKHFTQGK	DECOY_WP_008180932.1 MULTISPECIES: RNA polymerase sporulation sigma factor SigK [Lysinibacillus]	205	214	1	1175.61	0.0127651	10.8583	2	18	0.111111	228.942	0.0942994	2.0943	FALSE	TRUE	242	114	46.8935
F:\25-03-2022\20220324-TEST BROTH-POS-00.d	2165	scanId=1229113		20.4851	422.74	637.216	2	843.466	38	2927.48	K.ELQDVLK.N	ELQDVLK	DECOY_WP_051563180.1 MULTISPECIES: M23 family metallopeptidase [Lysinibacillus]	216	222	0	843.47	-0.00444848	-5.27402	2	12	0.166667	270.375	0.0923576	2.09236	FALSE	TRUE	242	115	47.1319
F:\25-03-2022\20220324-TEST BROTH-POS-00.d	2475	scanId=1416205		23.6033	453.755	722.011	2	905.495	40	2708.11	R.ALNRFGTK.F	ALNRFGTK	DECOY_WP_171821126.1 MULTISPECIES: cadmium-translocating P-type ATPase [Lysinibacillus]	570	577	1	905.508	-0.0133405	-14.7327	2	14	0.142857	248.445	0.091741	2.09174	FALSE	TRUE	242	116	47.1319
F:\25-03-2022\20220324-TEST BROTH-POS-00.d	2559	scanId=1463959		24.3992	630.834	809.323	2	1259.65	45	3457.61	R.VLRPTM(oxidation of M)VSVNE.-	VLRPTMVSVNE	WP_012295328.1 nucleotide exchange factor GrpE [Lysinibacillus fusiformis]	185	195	0	1259.65	-0.0011014	-0.874371	2	20	0.1	311.803	0.0901789	2.09018	TRUE	FALSE	243	116	47.1319
F:\25-03-2022\20220324-TEST BROTH-POS-00.d	4706	scanId=2663564		44.3926	1123.59	1591.57	2	2245.16	82	4890.71	-.M(oxidation of M)RVPVATKSHHYEVLLGHR.F	MRVPVATKSHHYEVLLGHR	WP_012293644.1 MULTISPECIES: 3-dehydroquinate synthase [Lysinibacillus]	1	19	2	2245.19	-0.0323507	-14.4089	2	36	0.0555556	439.165	0.0897959	2.0898	TRUE	FALSE	244	116	47.1319
F:\25-03-2022\20220324-TEST BROTH-POS-00.d	3347	scanId=1928218		32.1368	522.295	1230.13	2	1042.58	54	4540.16	K.QVRDVLEGK.V	QVRDVLEGK	WP_036162009.1 MULTISPECIES: HAMP domain-containing histidine kinase [Lysinibacillus]	105	113	1	1042.58	-0.00164314	-1.57604	2	16	0.125	407.387	0.0897296	2.08973	TRUE	FALSE	245	116	47.1319
F:\25-03-2022\20220324-TEST BROTH-POS-00.d	3785	scanId=2184106		36.4016	1266.15	1027.09	2	2530.28	49	2650.62	K.SEFLLPIDMVVHKQGAEIYADR.Q	SEFLLPIDMVVHKQGAEIYADR	DECOY_WP_024363819.1 MULTISPECIES: dephospho-CoA kinase [Lysinibacillus]	80	101	1	2530.29	-0.004655	-1.83971	2	42	0.047619	234.742	0.0885613	2.08856	FALSE	TRUE	245	117	47.5382
F:\25-03-2022\20220324-TEST BROTH-POS-00.d	3297	scanId=1898967		31.6493	537.314	1615.51	2	1072.61	50	3647.08	R.TALDEIGVKK.M	TALDEIGVKK	DECOY_WP_036161355.1 MULTISPECIES: ABC transporter ATP-binding protein [Lysinibacillus]	114	123	1	1072.61	-0.000345771	-0.322363	2	18	0.111111	318.043	0.0872049	2.0872	FALSE	TRUE	245	118	47.7496
F:\25-03-2022\20220324-TEST BROTH-POS-00.d	5183	scanId=2927446		48.7906	828.976	1616.12	2	1655.94	87	6625.43	K.GGQLVRSAGTSAQVLGR.E	GGQLVRSAGTSAQVLGR	WP_008181913.1 MULTISPECIES: 50S ribosomal protein L2 [Lysinibacillus]	151	167	1	1655.91	0.0301795	18.2253	2	32	0.0625	573.771	0.0866012	2.0866	TRUE	FALSE	246	118	47.7496
F:\25-03-2022\20220324-TEST BROTH-POS-00.d	1985	scanId=1121139		18.6855	498.767	1962.22	2	995.52	45	3535.32	K.VIFNGQYR.G	VIFNGQYR	DECOY_WP_227256954.1 MULTISPECIES: right-handed parallel beta-helix repeat-containing protein [Lysinibacillus]	375	382	0	995.519	0.00123234	1.23789	2	14	0.142857	304.811	0.0862188	2.08622	FALSE	TRUE	246	119	47.9593
F:\25-03-2022\20220324-TEST BROTH-POS-00.d	1983	scanId=1119754		18.6624	392.738	981.644	2	783.461	41	3814.3	R.KKFFSK.D	KKFFSK	WP_012292160.1 MULTISPECIES: DUF445 family protein [Lysinibacillus]	78	83	2	783.464	-0.00376151	-4.80112	2	10	0.2	325.926	0.0854484	2.08545	TRUE	FALSE	247	119	47.9593
F:\25-03-2022\20220324-TEST BROTH-POS-00.d	954	scanId=518499		8.64152	495.743	672.345	2	989.471	34	2563.59	R.EVIDETER.I	EVIDETER	DECOY_WP_012296223.1 MULTISPECIES: tRNA uridine-5-carboxymethylaminomethyl(34) synthesis GTPase MnmE [Lysinibacillus]	174	181	0	989.467	0.00441559	4.4626	2	14	0.142857	218.489	0.0852276	2.08523	FALSE	TRUE	247	120	48.3623
F:\25-03-2022\20220324-TEST BROTH-POS-00.d	1651	scanId=922865		15.381	365.218	927.492	2	728.422	51	4737.65	R.AIAGIER.L	AIAGIER	DECOY_WP_012293879.1 MULTISPECIES: MarR family transcriptional regulator [Lysinibacillus]	140	146	0	728.418	0.00352519	4.83952	2	12	0.166667	403.626	0.0851955	2.0852	FALSE	TRUE	247	121	48.7653
F:\25-03-2022\20220324-TEST BROTH-POS-00.d	1122	scanId=612487		10.208	345.689	1239.22	2	689.363	51	3437.15	K.KKDGDK.S	KKDGDK	DECOY_WP_012292923.1 MULTISPECIES: DUF4097 family beta strand repeat-containing protein [Lysinibacillus]	329	334	2	689.371	-0.00798853	-11.5882	2	10	0.2	292.714	0.0851617	2.08516	FALSE	TRUE	247	122	48.9701
F:\25-03-2022\20220324-TEST BROTH-POS-00.d	2477	scanId=1416870		23.6144	450.763	608.671	2	899.511	37	2531.3	R.QAIGRVEK.D	QAIGRVEK	WP_012295447.1 MULTISPECIES: preprotein translocase subunit YajC [Lysinibacillus]	78	85	1	899.519	-0.00799483	-8.88789	2	14	0.142857	215.449	0.085114	2.08511	TRUE	FALSE	248	122	48.9701
F:\25-03-2022\20220324-TEST BROTH-POS-00.d	1154	scanId=631051		10.5174	308.194	923.049	2	614.373	42	3542.57	R.KVPSGK.S	KVPSGK	DECOY_WP_090001958.1 MULTISPECIES: pyruvate carboxylase [Lysinibacillus]	48	53	1	614.375	-0.00228233	-3.71488	2	10	0.2	300.201	0.084741	2.08474	FALSE	TRUE	248	123	48.9765
F:\25-03-2022\20220324-TEST BROTH-POS-00.d	5315	scanId=3004801		50.0799	819.93	1079.92	2	1637.85	51	3983.69	K.FQVIMTSMNEITPK.M	FQVIMTSMNEITPK	WP_012293927.1 MULTISPECIES: methyl-accepting chemotaxis protein [Lysinibacillus]	564	577	0	1637.82	0.0305915	18.6782	2	26	0.0769231	334.008	0.0838438	2.08384	TRUE	FALSE	249	123	48.9765
F:\25-03-2022\20220324-TEST BROTH-POS-00.d	2465	scanId=1410389		23.5064	559.771	590.122	2	1117.53	48	3082.36	K.AGEITEDDLR.G	AGEITEDDLR	WP_089985339.1 MULTISPECIES: ribosome recycling factor [Lysinibacillus]	145	154	0	1117.53	0.00194053	1.73645	2	18	0.111111	257.242	0.0834563	2.08346	TRUE	FALSE	250	123	48.9765
F:\25-03-2022\20220324-TEST BROTH-POS-00.d	4151	scanId=2383604		39.7266	664.865	1505.25	2	1327.72	63	3994.29	K.GAAIAAEARQQSR.A	GAAIAAEARQQSR	DECOY_WP_139015318.1 MULTISPECIES: acetyl-CoA C-acetyltransferase [Lysinibacillus]	202	214	1	1327.7	0.019372	14.5907	2	24	0.0833333	332.619	0.0832736	2.08327	FALSE	TRUE	250	124	49.3747
F:\25-03-2022\20220324-TEST BROTH-POS-00.d	2632	scanId=1507115		25.1184	687.882	886.314	2	1373.75	52	3328.47	R.ELISLMDELAIK.M	ELISLMDELAIK	DECOY_WP_012295578.1 MULTISPECIES: phenylalanine--tRNA ligase subunit beta [Lysinibacillus]	368	379	0	1373.75	0.00228418	1.66274	2	22	0.0909091	272.228	0.0817875	2.08179	FALSE	TRUE	250	125	49.5762
F:\25-03-2022\20220324-TEST BROTH-POS-00.d	3062	scanId=1760465		29.3409	633.325	921.238	2	1264.64	44	2859.08	M.QSLDKQYQQK.F	QSLDKQYQQK	DECOY_WP_012292514.1 MULTISPECIES: DUF2252 family protein [Lysinibacillus]	2	11	1	1264.64	-0.00563778	-4.45801	2	18	0.111111	233.775	0.0817661	2.08177	FALSE	TRUE	250	126	49.5762
F:\25-03-2022\20220324-TEST BROTH-POS-00.d	3489	scanId=2013215		33.5534	972.492	555.275	2	1942.97	43	2903.9	R.SVGVMGDARTYDYAIGIR.A	SVGVMGDARTYDYAIGIR	WP_012292001.1 MULTISPECIES: glutamine-hydrolyzing GMP synthase [Lysinibacillus]	461	478	1	1942.96	0.0115699	5.95477	2	34	0.0588235	236.861	0.0815666	2.08157	TRUE	FALSE	251	126	49.5762
F:\25-03-2022\20220324-TEST BROTH-POS-00.d	2126	scanId=1205958		20.0992	629.825	1179.14	2	1257.64	38	3406.45	K.AVALLGIDSEDR.E	AVALLGIDSEDR	WP_012295309.1 MULTISPECIES: DUF3102 domain-containing protein [Lysinibacillus]	91	102	0	1257.66	-0.021225	-16.8766	2	22	0.0909091	277.517	0.0814681	2.08147	TRUE	FALSE	252	126	49.5762
F:\25-03-2022\20220324-TEST BROTH-POS-00.d	1618	scanId=902862		15.0476	416.235	895.018	2	830.455	50	4184.86	K.KSLQDIQ.-	KSLQDIQ	WP_012292413.1 MULTISPECIES: sel1 repeat family protein [Lysinibacillus]	613	619	1	830.45	0.00493667	5.94458	2	12	0.166667	334.7	0.0799788	2.07998	TRUE	FALSE	253	126	49.5762
F:\25-03-2022\20220324-TEST BROTH-POS-00.d	3612	scanId=2086728		34.7787	640.827	735.71	2	1279.64	38	2525.02	K.AQDVLNQYTTK.G	AQDVLNQYTTK	DECOY_WP_232735586.1 MULTISPECIES: peptide ABC transporter substrate-binding protein [Lysinibacillus]	95	105	0	1279.64	-0.00133819	-1.04575	2	20	0.1	201.49	0.0797975	2.0798	FALSE	TRUE	253	127	49.7729
F:\25-03-2022\20220324-TEST BROTH-POS-00.d	2163	scanId=1227728		20.462	521.279	534.198	2	1040.54	59	4724.11	K.VPIPDLEMK.Q	VPIPDLEMK	WP_012295141.1 MULTISPECIES: molecular chaperone [Lysinibacillus]	202	210	0	1040.56	-0.0140595	-13.5115	2	16	0.125	374.971	0.0793739	2.07937	TRUE	FALSE	254	127	49.7729
F:\25-03-2022\20220324-TEST BROTH-POS-00.d	4930	scanId=2781685		46.3613	1101.08	968.148	2	2200.14	66	3373.07	K.SLERFEGPALGYLDLFAFR.E	SLERFEGPALGYLDLFAFR	DECOY_WP_012293418.1 MULTISPECIES: rRNA pseudouridine synthase [Lysinibacillus]	19	37	1	2200.13	0.0126119	5.73232	2	36	0.0555556	262.989	0.0779672	2.07797	FALSE	TRUE	254	128	49.9636
F:\25-03-2022\20220324-TEST BROTH-POS-00.d	4345	scanId=2482957		41.3825	572.808	2040.24	2	1143.6	60	5896.22	R.LSENQLLAEK.Y	LSENQLLAEK	DECOY_WP_058844806.1 MULTISPECIES: alanine dehydrogenase [Lysinibacillus]	38	47	0	1143.61	-0.0122381	-10.7013	2	18	0.111111	459.054	0.0778557	2.07786	FALSE	TRUE	254	129	49.9636
F:\25-03-2022\20220324-TEST BROTH-POS-00.d	3411	scanId=1965952		32.7657	530.292	515.114	2	1058.57	40	3839.21	R.RLYTHLEK.V	RLYTHLEK	WP_012292578.1 MULTISPECIES: HAMP domain-containing histidine kinase [Lysinibacillus]	60	67	1	1058.59	-0.018155	-17.1502	2	14	0.142857	297.558	0.077505	2.0775	TRUE	FALSE	255	129	49.9636
F:\25-03-2022\20220324-TEST BROTH-POS-00.d	1511	scanId=839288		13.988	417.203	1290.46	2	832.392	46	4401	K.DNADAVTK.L	DNADAVTK	DECOY_WP_012293545.1 MULTISPECIES: arginase [Lysinibacillus]	225	232	0	832.393	-0.000674673	-0.810522	2	14	0.142857	339.143	0.0770603	2.07706	FALSE	TRUE	255	130	49.9636
F:\25-03-2022\20220324-TEST BROTH-POS-00.d	2299	scanId=1309278		21.8212	437.736	1736.02	2	873.458	42	3286.96	K.DLEGKQGK.Q	DLEGKQGK	WP_008180761.1 MULTISPECIES: flagellar basal body-associated protein FliL [Lysinibacillus]	104	111	1	873.456	0.00236724	2.7102	2	14	0.142857	253.043	0.0769838	2.07698	TRUE	FALSE	256	130	49.9636
F:\25-03-2022\20220324-TEST BROTH-POS-00.d	3075	scanId=1768332		29.4721	537.296	2135	2	1072.58	61	5562.4	K.GLSALGIEDAK.F	GLSALGIEDAK	WP_012292171.1 MULTISPECIES: HAD family hydrolase [Lysinibacillus]	104	114	0	1072.58	2.18443e-05	0.0203662	2	20	0.1	426.198	0.0766211	2.07662	TRUE	FALSE	257	130	49.9636
F:\25-03-2022\20220324-TEST BROTH-POS-00.d	3223	scanId=1855530		30.9254	457.783	838.606	2	913.551	62	5157.07	K.LVLLATER.G	LVLLATER	DECOY_WP_206700905.1 MULTISPECIES: GntR family transcriptional regulator [Lysinibacillus]	35	42	0	913.56	-0.00857498	-9.38634	2	14	0.142857	394.307	0.0764594	2.07646	FALSE	TRUE	257	131	49.9636
F:\25-03-2022\20220324-TEST BROTH-POS-00.d	2974	scanId=1706835		28.4471	622.831	832.086	2	1243.65	69	5361.73	K.GVNTAVVDISNR.A	GVNTAVVDISNR	WP_012293320.1 MULTISPECIES: BMP family protein [Lysinibacillus]	291	302	0	1243.65	-0.00364124	-2.92786	2	22	0.0909091	401.511	0.0748846	2.07488	TRUE	FALSE	258	131	49.9636
F:\25-03-2022\20220324-TEST BROTH-POS-00.d	3496	scanId=2017700		33.6282	629.347	695.897	2	1256.68	43	2271.55	K.IASGADGIVLDVK.C	IASGADGIVLDVK	WP_012293408.1 MULTISPECIES: thymidine phosphorylase [Lysinibacillus]	189	201	0	1256.7	-0.0190715	-15.1759	2	24	0.0833333	169.59	0.0746584	2.07466	TRUE	FALSE	259	131	49.9636
F:\25-03-2022\20220324-TEST BROTH-POS-00.d	1970	scanId=1111333		18.5221	458.27	729.37	2	914.525	40	2699.51	K.VLGNGTLNK.K	VLGNGTLNK	WP_010860592.1 MULTISPECIES: 50S ribosomal protein L15 [Lysinibacillus]	111	119	0	914.519	0.00600376	6.56494	2	16	0.125	199.491	0.0738989	2.0739	TRUE	FALSE	260	131	49.9636
F:\25-03-2022\20220324-TEST BROTH-POS-00.d	3283	scanId=1890379		31.5062	967.522	963.46	2	1933.03	40	2768.68	K.GVSHQLVM(oxidation of M)PDGSIIPIVR.K	GVSHQLVMPDGSIIPIVR	WP_012295231.1 MULTISPECIES: hypothetical protein [Lysinibacillus]	80	97	0	1933.05	-0.0158966	-8.2236	2	34	0.0588235	202.716	0.0732176	2.07322	TRUE	FALSE	261	131	49.9636
F:\25-03-2022\20220324-TEST BROTH-POS-00.d	5655	scanId=3205375		53.4228	947.981	678.973	2	1893.95	64	4051.74	R.VVAASSTQSAEGLEVATM(oxidation of M)K.I	VVAASSTQSAEGLEVATMK	DECOY_WP_012292535.1 MULTISPECIES: MurR/RpiR family transcriptional regulator [Lysinibacillus]	237	255	0	1893.94	0.0121529	6.41675	2	36	0.0555556	294.594	0.072708	2.07271	FALSE	TRUE	261	132	50.345
F:\25-03-2022\20220324-TEST BROTH-POS-00.d	4165	scanId=2390286		39.838	701.882	1981.94	2	1401.75	57	3771.94	R.LWRNETSIDIR.Y	LWRNETSIDIR	DECOY_WP_053597159.1 MULTISPECIES: L,D-transpeptidase family protein [Lysinibacillus]	99	109	1	1401.74	0.0128721	9.18297	2	20	0.1	273.441	0.0724936	2.07249	FALSE	TRUE	261	133	50.7192
F:\25-03-2022\20220324-TEST BROTH-POS-00.d	1790	scanId=1007369		16.7893	661.358	634.472	2	1320.7	49	3351.93	K.SLIGVGAFATETR.S	SLIGVGAFATETR	DECOY_WP_012294060.1 MULTISPECIES: Ger(x)C family spore germination protein [Lysinibacillus]	167	179	0	1320.7	-0.0018961	-1.43567	2	24	0.0833333	242.281	0.0722811	2.07228	FALSE	TRUE	261	134	50.7192
F:\25-03-2022\20220324-TEST BROTH-POS-00.d	2412	scanId=1377375		22.9561	530.323	378.335	2	1058.63	51	3811.72	R.QKILEMLGK.S	QKILEMLGK	WP_038509878.1 MULTISPECIES: DnaD domain protein [Lysinibacillus]	446	454	1	1058.62	0.0160318	15.1441	2	16	0.125	273.495	0.071751	2.07175	TRUE	FALSE	262	134	50.7192
F:\25-03-2022\20220324-TEST BROTH-POS-00.d	2281	scanId=1299027		21.6503	545.293	842.792	2	1088.57	43	2909.99	K.EIC[carbamidomethylation of C]LATQVR.Q	EICLATQVR	WP_012295225.1 MULTISPECIES: 4-hydroxy-3-methylbut-2-enyl diphosphate reductase [Lysinibacillus]	196	204	0	1088.56	0.0059206	5.43891	2	16	0.125	207.931	0.0714541	2.07145	TRUE	FALSE	263	134	50.7192
F:\25-03-2022\20220324-TEST BROTH-POS-00.d	1714	scanId=960937		16.0155	423.218	639.984	2	844.422	40	2972.23	K.EVAELER.L	EVAELER	DECOY_WP_012293240.1 MULTISPECIES: chromosome segregation protein SMC [Lysinibacillus]	450	456	0	844.429	-0.00699586	-8.28473	2	12	0.166667	212.127	0.0713697	2.07137	FALSE	TRUE	263	135	51.0977
F:\25-03-2022\20220324-TEST BROTH-POS-00.d	1860	scanId=1047214		17.4534	430.231	542.523	2	858.447	39	2527.71	R.QQGEVVVT.-	QQGEVVVT	DECOY_WP_012292232.1 MULTISPECIES: RNase adapter RapZ [Lysinibacillus]	290	297	0	858.445	0.00278765	3.24733	2	14	0.142857	179.51	0.0710167	2.07102	FALSE	TRUE	263	136	51.4762
F:\25-03-2022\20220324-TEST BROTH-POS-00.d	4607	scanId=2611811		43.5301	802.89	1482.83	2	1603.76	66	4996.27	K.EINLSKTEC[carbamidomethylation of C]YYGK.G	EINLSKTECYYGK	DECOY_WP_036161685.1 MULTISPECIES: PhzF family phenazine biosynthesis protein [Lysinibacillus]	4	16	1	1603.76	0.00931401	5.80762	2	24	0.0833333	354.47	0.0709468	2.07095	FALSE	TRUE	263	137	51.6301
F:\25-03-2022\20220324-TEST BROTH-POS-00.d	5232	scanId=2957974		49.2994	676.385	1372.11	2	1350.75	56	3559.81	K.GALHIADWEVIK.T	GALHIADWEVIK	DECOY_WP_036162363.1 MULTISPECIES: bifunctional 2',3'-cyclic-nucleotide 2'-phosphodiesterase/3'-nucleotidase [Lysinibacillus]	435	446	0	1350.73	0.0252896	18.7229	2	22	0.0909091	251.846	0.070747	2.07075	FALSE	TRUE	263	138	51.6301
F:\25-03-2022\20220324-TEST BROTH-POS-00.d	1334	scanId=735869		12.2644	380.712	418.289	2	759.409	34	2934.12	K.TSLAPGSK.V	TSLAPGSK	WP_036161804.1 MULTISPECIES: aconitate hydratase AcnA [Lysinibacillus]	475	482	0	759.413	-0.00340345	-4.48169	2	14	0.142857	207.092	0.0705808	2.07058	TRUE	FALSE	264	138	51.6301
F:\25-03-2022\20220324-TEST BROTH-POS-00.d	2442	scanId=1396314		23.2718	358.723	1844.37	2	715.431	40	3358.74	K.M(oxidation of M)LPLVK.D	MLPLVK	DECOY_WP_031418822.1 MULTISPECIES: NAD(P)-dependent oxidoreductase [Lysinibacillus]	137	142	0	715.43	0.00115637	1.61633	2	10	0.2	236.749	0.0704874	2.07049	FALSE	TRUE	264	139	51.6301
F:\25-03-2022\20220324-TEST BROTH-POS-00.d	2886	scanId=1655980		27.5995	528.793	1373.39	2	1055.57	46	3455.66	R.KPAWLQWK.E	KPAWLQWK	WP_036161618.1 MULTISPECIES: MATE family efflux transporter [Lysinibacillus]	232	239	0	1055.59	-0.0201469	-19.0859	2	14	0.142857	243.341	0.0704181	2.07042	TRUE	FALSE	265	139	51.6301
F:\25-03-2022\20220324-TEST BROTH-POS-00.d	2174	scanId=1234430		20.5737	445.756	736.678	2	889.498	36	2571.65	K.AM(oxidation of M)GLIEIK.Q	AMGLIEIK	WP_231595554.1 MULTISPECIES: FadR family transcriptional regulator [Lysinibacillus]	42	49	0	889.494	0.00338026	3.8002	2	14	0.142857	180.778	0.0702963	2.0703	TRUE	FALSE	266	139	51.6301
F:\25-03-2022\20220324-TEST BROTH-POS-00.d	964	scanId=524263		8.7376	472.26	412.449	2	942.506	42	3310.49	K.DENLIAIR.R	DENLIAIR	WP_012292730.1 MULTISPECIES: TetR/AcrR family transcriptional regulator [Lysinibacillus]	16	23	0	942.513	-0.00780115	-8.27697	2	14	0.142857	229.299	0.0692644	2.06926	TRUE	FALSE	267	139	51.6301
F:\25-03-2022\20220324-TEST BROTH-POS-00.d	6014	scanId=3411931		56.8654	888.446	1051.38	2	1774.88	88	5283.81	K.QVAAM(oxidation of M)GASGVLVGEALMR.S	QVAAMGASGVLVGEALMR	WP_012295436.1 MULTISPECIES: indole-3-glycerol phosphate synthase TrpC [Lysinibacillus]	226	243	0	1774.91	-0.0304744	-17.1696	2	34	0.0588235	364.743	0.0690304	2.06903	TRUE	FALSE	268	139	51.6301
F:\25-03-2022\20220324-TEST BROTH-POS-00.d	3379	scanId=1947002		32.4499	614.339	633.706	2	1226.66	38	2857.43	K.ATVPEIHIYGK.D	ATVPEIHIYGK	DECOY_WP_031416904.1 MULTISPECIES: nucleotidyltransferase-like protein [Lysinibacillus]	23	33	0	1226.67	-0.0015819	-1.2896	2	20	0.1	196.459	0.0687536	2.06875	FALSE	TRUE	268	140	52.0015
F:\25-03-2022\20220324-TEST BROTH-POS-00.d	5134	scanId=2899062		48.3176	593.824	1303.56	2	1185.63	73	5113.26	K.NAKLQDLTQR.A	NAKLQDLTQR	DECOY_WP_012293077.1 MULTISPECIES: family 10 glycosylhydrolase [Lysinibacillus]	447	456	1	1185.65	-0.0140892	-11.8832	2	18	0.111111	350.496	0.0685464	2.06855	FALSE	TRUE	268	141	52.373
F:\25-03-2022\20220324-TEST BROTH-POS-00.d	2814	scanId=1614044		26.9006	509.251	734.026	2	1016.49	49	3507.58	M.VTFYNM(oxidation of M)VK.K	VTFYNMVK	DECOY_WP_012292960.1 MULTISPECIES: lytic transglycosylase domain-containing protein [Lysinibacillus]	2	9	0	1016.5	-0.0128669	-12.658	2	14	0.142857	239.405	0.0682536	2.06825	FALSE	TRUE	268	142	52.7444
F:\25-03-2022\20220324-TEST BROTH-POS-00.d	3196	scanId=1839846		30.664	816.932	671.386	2	1631.85	38	2610.84	K.EDKLMKEEAAEIVK.E	EDKLMKEEAAEIVK	DECOY_WP_031418655.1 MULTISPECIES: RraA family protein [Lysinibacillus]	26	39	2	1631.84	0.00505314	3.09658	2	26	0.0769231	175.636	0.067272	2.06727	FALSE	TRUE	268	143	52.8276
F:\25-03-2022\20220324-TEST BROTH-POS-00.d	5288	scanId=2989169		49.8194	1059.53	1354.76	2	2117.05	92	5374.37	K.GVVYFMM(oxidation of M)AGIIM(oxidation of M)SVLGEIR.T	GVVYFMMAGIIMSVLGEIR	DECOY_WP_012292401.1 MULTISPECIES: cation diffusion facilitator family transporter [Lysinibacillus]	108	126	0	2117.07	-0.0173288	-8.18525	2	36	0.0555556	357.329	0.0664876	2.06649	FALSE	TRUE	268	144	52.8276
F:\25-03-2022\20220324-TEST BROTH-POS-00.d	1996	scanId=1127289		18.788	498.266	1511.9	2	994.517	42	2990.71	K.VIPNPEGNR.T	VIPNPEGNR	WP_012295327.1 MULTISPECIES: molecular chaperone DnaK [Lysinibacillus]	26	34	0	994.52	-0.00239392	-2.40711	2	16	0.125	198.436	0.0663507	2.06635	TRUE	FALSE	269	144	52.8276
F:\25-03-2022\20220324-TEST BROTH-POS-00.d	2488	scanId=1423354		23.7224	478.79	891.982	2	955.565	49	4303.27	K.RINELAIK.L	RINELAIK	DECOY_WP_012295979.1 MULTISPECIES: RidA family protein [Lysinibacillus]	71	78	1	955.581	-0.0161422	-16.8925	2	14	0.142857	285.481	0.0663404	2.06634	FALSE	TRUE	269	145	52.8276
F:\25-03-2022\20220324-TEST BROTH-POS-00.d	4321	scanId=2470575		41.1761	586.836	2650.38	2	1171.66	81	8813.68	K.LPDGVTKISDK.K	LPDGVTKISDK	WP_012296034.1 MULTISPECIES: CdaR family protein [Lysinibacillus]	292	302	1	1171.64	0.0122989	10.4971	2	20	0.1	584.401	0.0663061	2.06631	TRUE	FALSE	270	145	52.8276
F:\25-03-2022\20220324-TEST BROTH-POS-00.d	4329	scanId=2474674		41.2444	547.321	1820	2	1092.63	84	6978.38	R.ESVKKVFEK.V	ESVKKVFEK	DECOY_WP_012293243.1 MULTISPECIES: signal recognition particle protein [Lysinibacillus]	396	404	2	1092.62	0.00865712	7.92329	2	16	0.125	458.348	0.0656811	2.06568	FALSE	TRUE	270	146	52.8276
F:\25-03-2022\20220324-TEST BROTH-POS-00.d	4083	scanId=2347881		39.1312	660.353	1494.88	2	1318.69	75	4216.53	K.GQLFFTSHNLR.V	GQLFFTSHNLR	WP_012291947.1 MULTISPECIES: AAA family ATPase [Lysinibacillus]	364	374	0	1318.68	0.0135943	10.309	2	20	0.1	276.36	0.0655421	2.06554	TRUE	FALSE	271	146	52.8276
F:\25-03-2022\20220324-TEST BROTH-POS-00.d	2210	scanId=1256419		20.9402	443.265	1177	2	884.516	57	3997.55	R.IVADAIQR.G	IVADAIQR	WP_031418918.1 MULTISPECIES: UDP-N-acetylmuramoyl-L-alanine--D-glutamate ligase [Lysinibacillus]	88	95	0	884.508	0.00846003	9.56468	2	14	0.142857	261.529	0.0654225	2.06542	TRUE	FALSE	272	146	52.8276
F:\25-03-2022\20220324-TEST BROTH-POS-00.d	3003	scanId=1724506		28.7416	420.75	969.146	2	839.485	42	3742.96	K.NLLLPDR.M	NLLLPDR	WP_036162346.1 MULTISPECIES: AroM family protein [Lysinibacillus]	110	116	0	839.487	-0.00165108	-1.96677	2	12	0.166667	244.22	0.0652478	2.06525	TRUE	FALSE	273	146	52.8276
F:\25-03-2022\20220324-TEST BROTH-POS-00.d	3789	scanId=2186156		36.4358	446.742	1300.33	2	891.47	52	3534.05	K.DILAGFEK.Q	DILAGFEK	WP_012293096.1 MULTISPECIES: dihydrolipoyl dehydrogenase [Lysinibacillus]	210	217	0	891.47	-0.000140749	-0.157884	2	14	0.142857	230.512	0.0652258	2.06523	TRUE	FALSE	274	146	52.8276
F:\25-03-2022\20220324-TEST BROTH-POS-00.d	6027	scanId=3419413		56.9901	877.445	752.062	2	1752.88	67	3385.76	R.QELAATSPYIAEVFSK.F	QELAATSPYIAEVFSK	WP_227256912.1 MULTISPECIES: flagellar biosynthetic protein FliO [Lysinibacillus]	161	176	0	1752.89	-0.0170188	-9.70897	2	30	0.0666667	220.565	0.0651448	2.06514	TRUE	FALSE	275	146	52.8276
F:\25-03-2022\20220324-TEST BROTH-POS-00.d	4839	scanId=2732543		45.5423	718.91	1725.1	2	1435.81	91	7139.16	K.RIAPHM(oxidation of M)IDNLIK.R	RIAPHMIDNLIK	DECOY_WP_089985710.1 MULTISPECIES: dephospho-CoA kinase [Lysinibacillus]	108	119	1	1435.8	0.00891779	6.21104	2	22	0.0909091	463.892	0.0649785	2.06498	FALSE	TRUE	275	147	52.8276
F:\25-03-2022\20220324-TEST BROTH-POS-00.d	2922	scanId=1677031		27.9504	420.754	1461.68	2	839.493	52	3767.7	K.KAHILMK.E	KAHILMK	WP_082011579.1 MULTISPECIES: reverse transcriptase domain-containing protein [Lysinibacillus]	431	437	1	839.505	-0.0124546	-14.8357	2	12	0.166667	244.36	0.0648564	2.06486	TRUE	FALSE	276	147	52.8276
F:\25-03-2022\20220324-TEST BROTH-POS-00.d	3245	scanId=1868549		31.1424	724.881	600.656	2	1447.75	58	3477.19	R.FQLATGQLENTAR.I	FQLATGQLENTAR	WP_010860598.1 MULTISPECIES: 50S ribosomal protein L29 [Lysinibacillus]	30	42	0	1447.74	0.00486881	3.36304	2	24	0.0833333	224.379	0.0645288	2.06453	TRUE	FALSE	277	147	52.8276
F:\25-03-2022\20220324-TEST BROTH-POS-00.d	3557	scanId=2054878		34.2478	858.956	767.107	2	1715.9	66	4174.98	K.RTETELKVLEEELK.R	RTETELKVLEEELK	DECOY_WP_031419233.1 MULTISPECIES: transcription elongation factor GreA [Lysinibacillus]	135	148	2	1715.93	-0.0338648	-19.7356	2	26	0.0769231	266.737	0.0638893	2.06389	FALSE	TRUE	277	148	53.1869
F:\25-03-2022\20220324-TEST BROTH-POS-00.d	3385	scanId=1950601		32.5099	575.31	1082.09	2	1148.61	47	3957.19	K.AKTFALDLDR.N	AKTFALDLDR	DECOY_WP_012292775.1 MULTISPECIES: flagellar hook-basal body protein [Lysinibacillus]	182	191	1	1148.62	-0.0131632	-11.46	2	18	0.111111	250.232	0.0632349	2.06323	FALSE	TRUE	277	149	53.3537
F:\25-03-2022\20220324-TEST BROTH-POS-00.d	2270	scanId=1292323		21.5386	530.783	574.288	2	1059.55	43	3085.41	K.LESAGVIESR.S	LESAGVIESR	WP_012293257.1 MULTISPECIES: GTP-sensing pleiotropic transcriptional regulator CodY [Lysinibacillus]	224	233	0	1059.56	-0.0036888	-3.48146	2	18	0.111111	195.104	0.0632342	2.06323	TRUE	FALSE	278	149	53.3537
F:\25-03-2022\20220324-TEST BROTH-POS-00.d	2092	scanId=1185574		19.7594	443.259	734.883	2	884.504	44	3424.44	R.QGGSLAKPK.R	QGGSLAKPK	DECOY_WP_012292993.1 MULTISPECIES: sn-glycerol-3-phosphate ABC transporter ATP-binding protein UgpC [Lysinibacillus]	228	236	0	884.508	-0.00398175	-4.50165	2	16	0.125	216.279	0.0631573	2.06316	FALSE	TRUE	278	150	53.5192
F:\25-03-2022\20220324-TEST BROTH-POS-00.d	2807	scanId=1609944		26.8323	658.39	945.56	2	1314.76	53	3730.38	K.QLLFILLDNAR.K	QLLFILLDNAR	WP_036160615.1 MULTISPECIES: HAMP domain-containing histidine kinase [Lysinibacillus]	326	336	0	1314.77	-0.00128614	-0.97823	2	20	0.1	234.94	0.0629802	2.06298	TRUE	FALSE	279	150	53.5192
F:\25-03-2022\20220324-TEST BROTH-POS-00.d	3257	scanId=1875917		31.2651	558.304	646.285	2	1114.59	107	23327.9	R.EISTLM(oxidation of M)HLR.A	EISTLMHLR	DECOY_WP_012291944.1 MULTISPECIES: non-ribosomal peptide synthetase [Lysinibacillus]	781	789	0	1114.58	0.0128351	11.5157	2	16	0.125	1468.82	0.062964	2.06296	FALSE	TRUE	279	151	53.6285
F:\25-03-2022\20220324-TEST BROTH-POS-00.d	2170	scanId=1232214		20.5368	523.285	2351.44	2	1044.56	50	4321.22	R.LMVVTPGSNK.V	LMVVTPGSNK	WP_054550032.1 MULTISPECIES: tRNA preQ1(34) S-adenosylmethionine ribosyltransferase-isomerase QueA [Lysinibacillus]	28	37	0	1044.56	-0.00794221	-7.60338	2	18	0.111111	271.638	0.0628614	2.06286	TRUE	FALSE	280	151	53.6285
F:\25-03-2022\20220324-TEST BROTH-POS-00.d	2470	scanId=1413656		23.5608	446.244	1149.63	2	890.474	39	2282.32	R.GLSTIDASK.L	GLSTIDASK	DECOY_WP_068986766.1 MULTISPECIES: chaperonin GroEL [Lysinibacillus]	229	237	0	890.471	0.00351501	3.94736	2	16	0.125	143.42	0.0628398	2.06284	FALSE	TRUE	280	152	53.6285
F:\25-03-2022\20220324-TEST BROTH-POS-00.d	3583	scanId=2070497		34.5082	618.333	609.598	2	1234.65	36	2425.28	M.WIDGVFSGGGLK.G	WIDGVFSGGGLK	WP_012291836.1 MULTISPECIES: patatin-like phospholipase family protein [Lysinibacillus]	2	13	0	1234.63	0.0173592	14.0602	2	22	0.0909091	152.088	0.0627093	2.06271	TRUE	FALSE	281	152	53.6285
F:\25-03-2022\20220324-TEST BROTH-POS-00.d	3334	scanId=1920518		32.0085	460.276	773.509	2	918.538	50	3921.84	K.TVLLTGTSK.T	TVLLTGTSK	WP_012295481.1 MULTISPECIES: uroporphyrinogen-III synthase [Lysinibacillus]	11	19	0	918.539	-0.000170262	-0.185362	2	16	0.125	245.349	0.0625597	2.06256	TRUE	FALSE	282	152	53.6285
F:\25-03-2022\20220324-TEST BROTH-POS-00.d	2144	scanId=1216594		20.2764	523.293	797.831	2	1044.57	37	2460.26	R.AENKSIEVR.K	AENKSIEVR	DECOY_WP_227256916.1 MULTISPECIES: pyridoxamine 5'-phosphate oxidase family protein [Lysinibacillus]	89	97	1	1044.56	0.0153499	14.6951	2	16	0.125	153.865	0.0625399	2.06254	FALSE	TRUE	282	153	53.6285
F:\25-03-2022\20220324-TEST BROTH-POS-00.d	2504	scanId=1432437		23.8738	349.236	2081.83	2	696.458	50	4983.2	K.VIQPIK.Q	VIQPIK	WP_031419862.1 MULTISPECIES: methyl-accepting chemotaxis protein [Lysinibacillus]	58	63	0	696.453	0.00432655	6.21227	2	10	0.2	309.604	0.0621295	2.06213	TRUE	FALSE	283	153	53.6285
F:\25-03-2022\20220324-TEST BROTH-POS-00.d	4020	scanId=2315361		38.5892	973.521	1331.81	2	1945.03	86	5228.42	K.LNVGEDTKIESVSGKELK.A	LNVGEDTKIESVSGKELK	WP_052323565.1 MULTISPECIES: stalk domain-containing protein [Lysinibacillus]	153	170	2	1945.04	-0.00842434	-4.3312	2	34	0.0588235	322.036	0.0615934	2.06159	TRUE	FALSE	284	153	53.6285
F:\25-03-2022\20220324-TEST BROTH-POS-00.d	1826	scanId=1027649		17.1273	250.681	1127.7	2	499.348	35	4909.98	R.LVIR.V	LVIR	DECOY_WP_126659346.1 MULTISPECIES: chaperonin GroEL [Lysinibacillus]	102	105	0	499.348	-0.000642597	-1.28687	2	6	0.333333	302.263	0.061561	2.06156	FALSE	TRUE	284	154	53.7617
F:\25-03-2022\20220324-TEST BROTH-POS-00.d	1964	scanId=1108285		18.4713	456.752	585.592	2	911.49	36	2058.03	K.IAVGPEAAGK.V	IAVGPEAAGK	WP_012292740.1 MULTISPECIES: class II fructose-bisphosphatase [Lysinibacillus]	124	133	0	911.508	-0.0172478	-18.9223	2	18	0.111111	126.503	0.0614682	2.06147	TRUE	FALSE	285	154	53.7617
F:\25-03-2022\20220324-TEST BROTH-POS-00.d	3449	scanId=1989058		33.1508	744.906	1355.35	2	1487.8	63	4454.23	R.INSAEKM(oxidation of M)LTAPLGK.L	INSAEKMLTAPLGK	DECOY_WP_012292539.1 MULTISPECIES: NAD(P)/FAD-dependent oxidoreductase [Lysinibacillus]	16	29	1	1487.8	-0.00378414	-2.54344	2	26	0.0769231	273.033	0.0612973	2.0613	FALSE	TRUE	285	155	53.7617
F:\25-03-2022\20220324-TEST BROTH-POS-00.d	3662	scanId=2114809		35.2467	654.828	1352.02	2	1307.64	56	3788.12	K.YIYETGSKYGK.R	YIYETGSKYGK	WP_036160881.1 MULTISPECIES: CoA-acylating methylmalonate-semialdehyde dehydrogenase [Lysinibacillus]	238	248	1	1307.64	0.00169555	1.29665	2	20	0.1	230.621	0.06088	2.06088	TRUE	FALSE	286	155	53.7617
F:\25-03-2022\20220324-TEST BROTH-POS-00.d	2947	scanId=1691601		28.1932	420.751	858.769	2	839.487	44	4418.34	K.NLLLPDR.M	NLLLPDR	WP_036162346.1 MULTISPECIES: AroM family protein [Lysinibacillus]	110	116	0	839.487	0.000937361	1.11659	2	12	0.166667	268.654	0.0608043	2.0608	TRUE	FALSE	287	155	53.7617
F:\25-03-2022\20220324-TEST BROTH-POS-00.d	3678	scanId=2123674		35.3944	500.292	1212	2	998.569	69	5722.93	R.IATLEVEPK.G	IATLEVEPK	DECOY_WP_012295792.1 MULTISPECIES: PH domain-containing protein [Lysinibacillus]	350	358	0	998.565	0.00399672	4.00246	2	16	0.125	347.321	0.0606893	2.06069	FALSE	TRUE	287	156	54.1085
F:\25-03-2022\20220324-TEST BROTH-POS-00.d	3891	scanId=2244975		37.4161	443.764	1388.5	2	885.513	67	4343.46	R.TGARGVGIR.A	TGARGVGIR	DECOY_WP_012293767.1 MULTISPECIES: ethanolamine ammonia-lyase subunit EutC [Lysinibacillus]	214	222	1	885.514	-0.00188181	-2.1251	2	16	0.125	263.582	0.0606849	2.06068	FALSE	TRUE	287	157	54.4554
F:\25-03-2022\20220324-TEST BROTH-POS-00.d	2338	scanId=1333267		22.221	304.192	1313.9	2	606.37	37	3643.82	M.FTLVK.K	FTLVK	DECOY_WP_012293094.1 MULTISPECIES: alpha-ketoacid dehydrogenase subunit beta [Lysinibacillus]	2	6	0	606.374	-0.00400024	-6.59699	2	8	0.25	220.756	0.0605837	2.06058	FALSE	TRUE	287	158	54.5786
F:\25-03-2022\20220324-TEST BROTH-POS-00.d	3708	scanId=2140792		35.6797	923.943	622.815	2	1845.87	46	2507.59	R.GALAFEPLGDDPYQEPK.V	GALAFEPLGDDPYQEPK	DECOY_WP_126659563.1 MULTISPECIES: ribosome biogenesis GTP-binding protein YihA/YsxC [Lysinibacillus]	165	181	0	1845.88	-0.00681015	-3.68938	2	32	0.0625	151.894	0.0605738	2.06057	FALSE	TRUE	287	159	54.5786
F:\25-03-2022\20220324-TEST BROTH-POS-00.d	2516	scanId=1439085		23.9846	379.723	1051.32	2	757.432	36	3499.7	K.AVIAGAEK.V	AVIAGAEK	WP_012292989.1 MULTISPECIES: class II fructose-bisphosphate aldolase [Lysinibacillus]	33	40	0	757.433	-0.00184843	-2.44039	2	14	0.142857	210.268	0.0600816	2.06008	TRUE	FALSE	288	159	54.5786
F:\25-03-2022\20220324-TEST BROTH-POS-00.d	2150	scanId=1220194		20.3364	565.804	346.876	2	1129.59	24	1859.26	R.LEQLEEELK.K	LEQLEEELK	WP_012295575.1 MULTISPECIES: cell division protein ZapA [Lysinibacillus]	74	82	0	1129.59	0.00661045	5.85209	2	16	0.125	111.375	0.0599029	2.0599	TRUE	FALSE	289	159	54.5786
F:\25-03-2022\20220324-TEST BROTH-POS-00.d	3561	scanId=2057646		34.294	488.284	1026.9	2	974.553	44	3226.94	K.IGLFGGAGVGK.T	IGLFGGAGVGK	WP_012292768.1 MULTISPECIES: F0F1 ATP synthase subunit beta [Lysinibacillus]	152	162	0	974.555	-0.00187713	-1.92614	2	20	0.1	193.287	0.0598979	2.0599	TRUE	FALSE	290	159	54.5786
F:\25-03-2022\20220324-TEST BROTH-POS-00.d	2515	scanId=1438753		23.9791	708.847	695.476	2	1415.68	50	3330.25	K.VPTEEISSSNEPK.V	VPTEEISSSNEPK	DECOY_WP_036162170.1 MULTISPECIES: helix-turn-helix domain-containing protein [Lysinibacillus]	36	48	0	1415.68	0.000535923	0.378563	2	24	0.0833333	196.745	0.0590782	2.05908	FALSE	TRUE	290	160	54.9218
F:\25-03-2022\20220324-TEST BROTH-POS-00.d	3621	scanId=2091326		34.8553	732.39	712.109	2	1462.77	46	3193.42	K.QFAMIRDREIGK.L	QFAMIRDREIGK	DECOY_WP_012292086.1 MULTISPECIES: aminopeptidase [Lysinibacillus]	291	302	2	1462.77	-0.00622978	-4.25889	2	22	0.0909091	188.392	0.0589938	2.05899	FALSE	TRUE	290	161	55.0752
F:\25-03-2022\20220324-TEST BROTH-POS-00.d	3461	scanId=1996594		33.2764	652.335	1027.94	2	1302.66	50	4007.47	K.TVEVLNTDAEGR.L	TVEVLNTDAEGR	WP_036160563.1 MULTISPECIES: leucyl aminopeptidase [Lysinibacillus]	342	353	0	1302.64	0.0139758	10.7288	2	22	0.0909091	233.153	0.0581796	2.05818	TRUE	FALSE	291	161	55.0752
F:\25-03-2022\20220324-TEST BROTH-POS-00.d	2741	scanId=1571110		26.185	336.231	734.36	2	670.448	39	3528.82	K.INILAK.V	INILAK	DECOY_WP_031419745.1 MULTISPECIES: DUF2975 domain-containing protein [Lysinibacillus]	71	76	0	670.438	0.0104182	15.5394	2	10	0.2	204.489	0.0579484	2.05795	FALSE	TRUE	291	162	55.1538
F:\25-03-2022\20220324-TEST BROTH-POS-00.d	2396	scanId=1368727		22.812	555.774	773.957	2	1109.53	41	2622.61	R.IEIGM(oxidation of M)QEFK.E	IEIGMQEFK	DECOY_WP_012293725.1 MULTISPECIES: spore photoproduct lyase [Lysinibacillus]	308	316	0	1109.54	-0.00883291	-7.96086	2	16	0.125	151.954	0.0579398	2.05794	FALSE	TRUE	291	163	55.1538
F:\25-03-2022\20220324-TEST BROTH-POS-00.d	1811	scanId=1018949		16.9824	401.24	1403.86	2	800.466	60	5045.6	K.LAEEIVK.E	LAEEIVK	DECOY_WP_012291979.1 MULTISPECIES: methionine synthase [Lysinibacillus]	723	729	0	800.464	0.00154969	1.93599	2	12	0.166667	290.506	0.0575761	2.05758	FALSE	TRUE	291	164	55.1538
F:\25-03-2022\20220324-TEST BROTH-POS-00.d	2308	scanId=1314929		21.9154	379.723	801.259	2	757.431	38	3205.91	R.VNGEIVK.N	VNGEIVK	WP_012291792.1 MULTISPECIES: Larvicidal toxin protein [Lysinibacillus]	374	380	0	757.433	-0.00289242	-3.81871	2	12	0.166667	183.992	0.0573914	2.05739	TRUE	FALSE	292	164	55.1538
F:\25-03-2022\20220324-TEST BROTH-POS-00.d	3087	scanId=1775368		29.5893	772.891	966.084	2	1543.77	47	2676.93	K.SDIGITPTNDGSVIR.L	SDIGITPTNDGSVIR	WP_079560488.1 MULTISPECIES: ribosome recycling factor [Lysinibacillus]	85	99	0	1543.78	-0.0169661	-10.9899	2	28	0.0714286	153.304	0.0572684	2.05727	TRUE	FALSE	293	164	55.1538
F:\25-03-2022\20220324-TEST BROTH-POS-00.d	1034	scanId=562917		9.38182	380.712	610.338	2	759.41	32	2634.09	R.ELQTAAK.T	ELQTAAK	WP_012293093.1 MULTISPECIES: pyruvate dehydrogenase (acetyl-transferring) E1 component subunit alpha [Lysinibacillus]	213	219	0	759.413	-0.0023237	-3.05986	2	12	0.166667	150.655	0.0571945	2.05719	TRUE	FALSE	294	164	55.1538
F:\25-03-2022\20220324-TEST BROTH-POS-00.d	1125	scanId=614370		10.2394	517.773	635.207	2	1033.53	28	1322.03	-.MEKQEKNK.I	MEKQEKNK	WP_036128254.1 MULTISPECIES: cell division protein ZapA [Lysinibacillus]	1	8	2	1033.52	0.00876808	8.48368	2	14	0.142857	75.1338	0.056832	2.05683	TRUE	FALSE	295	164	55.1538
F:\25-03-2022\20220324-TEST BROTH-POS-00.d	4574	scanId=2595340		43.2555	674.887	2820.95	2	1347.76	84	5857.15	R.YPSLPGIM(oxidation of M)KAKK.K	YPSLPGIMKAKK	WP_012295569.1 MULTISPECIES: electron transfer flavoprotein subunit beta/FixA family protein [Lysinibacillus]	185	196	2	1347.76	0.000148598	0.110255	2	22	0.0909091	329.071	0.0561828	2.05618	TRUE	FALSE	296	164	55.1538
F:\25-03-2022\20220324-TEST BROTH-POS-00.d	2994	scanId=1719189		28.653	582.291	3486.59	2	1162.57	79	7686.35	K.TPNKFAQDDK.D	TPNKFAQDDK	DECOY_WP_036161696.1 MULTISPECIES: carbamate kinase [Lysinibacillus]	184	193	1	1162.56	0.00470446	4.04663	2	18	0.111111	429.434	0.0558697	2.05587	FALSE	TRUE	296	165	55.4473
F:\25-03-2022\20220324-TEST BROTH-POS-00.d	6760	scanId=3839515		63.9918	1316.65	1348.56	2	2631.28	130	7201.68	K.NTTFFVIRKDGEYVYDYTGSEK.E	NTTFFVIRKDGEYVYDYTGSEK	DECOY_WP_036160806.1 MULTISPECIES: methyl-accepting chemotaxis protein [Lysinibacillus]	406	427	2	2631.25	0.0303423	11.5315	2	42	0.047619	400.201	0.0555705	2.05557	FALSE	TRUE	296	166	55.4473
F:\25-03-2022\20220324-TEST BROTH-POS-00.d	2843	scanId=1630996		27.1831	486.282	787.66	2	970.55	43	2661.51	K.LVNEVEIR.N	LVNEVEIR	DECOY_WP_012291855.1 MULTISPECIES: response regulator [Lysinibacillus]	180	187	0	970.545	0.00487865	5.02671	2	14	0.142857	145.625	0.0547151	2.05472	FALSE	TRUE	296	167	55.4473
F:\25-03-2022\20220324-TEST BROTH-POS-00.d	3649	scanId=2107609		35.1267	691.824	991.831	2	1381.63	62	3896.35	K.SNKYSSSYVYGK.A	SNKYSSSYVYGK	WP_012292873.1 MULTISPECIES: S-layer homology domain-containing protein [Lysinibacillus]	369	380	1	1381.65	-0.0174093	-12.6004	2	22	0.0909091	212.507	0.05454	2.05454	TRUE	FALSE	297	167	55.4473
F:\25-03-2022\20220324-TEST BROTH-POS-00.d	3160	scanId=1818241		30.3039	814.929	1102.84	2	1627.84	74	4292.23	K.EVTIIGVPMDLGQTR.R	EVTIIGVPMDLGQTR	WP_012293545.1 MULTISPECIES: arginase [Lysinibacillus]	4	18	0	1627.86	-0.0164038	-10.0769	2	28	0.0714286	233.645	0.0544344	2.05443	TRUE	FALSE	298	167	55.4473
F:\25-03-2022\20220324-TEST BROTH-POS-00.d	2928	scanId=1680632		28.0104	436.266	1298.92	2	870.517	41	4301.4	R.SVIVNALR.K	SVIVNALR	WP_012293257.1 MULTISPECIES: GTP-sensing pleiotropic transcriptional regulator CodY [Lysinibacillus]	215	222	0	870.529	-0.0116019	-13.3274	2	14	0.142857	233.802	0.0543548	2.05435	TRUE	FALSE	299	167	55.4473
F:\25-03-2022\20220324-TEST BROTH-POS-00.d	1163	scanId=636701		10.6115	410.214	1272.72	2	818.414	53	4058.19	R.ITNQESK.L	ITNQESK	DECOY_WP_012295663.1 MULTISPECIES: DUF927 domain-containing protein [Lysinibacillus]	55	61	0	818.413	0.000993122	1.21347	2	12	0.166667	219.549	0.0541002	2.0541	FALSE	TRUE	299	168	55.4473
F:\25-03-2022\20220324-TEST BROTH-POS-00.d	2859	scanId=1640413		27.3401	596.313	1245.14	2	1190.61	57	4268.4	R.EGKQALQFDR.T	EGKQALQFDR	WP_012293136.1 MULTISPECIES: glycerophosphodiester phosphodiesterase [Lysinibacillus]	32	41	1	1190.6	0.00719403	6.04233	2	18	0.111111	230.695	0.0540471	2.05405	TRUE	FALSE	300	168	55.4473
F:\25-03-2022\20220324-TEST BROTH-POS-00.d	3647	scanId=2106225		35.1036	639.334	1086.03	2	1276.65	46	4867.09	R.VGNISLQFDER.G	VGNISLQFDER	DECOY_WP_036161990.1 MULTISPECIES: non-ribosomal peptide synthetase [Lysinibacillus]	1210	1220	0	1276.64	0.01256	9.8383	2	20	0.1	261.261	0.0536792	2.05368	FALSE	TRUE	300	169	55.4473
F:\25-03-2022\20220324-TEST BROTH-POS-00.d	2445	scanId=1398199		23.3032	394.238	796.646	2	786.461	46	3411.81	K.VASEIIR.K	VASEIIR	DECOY_WP_012295970.1 MULTISPECIES: TetR/AcrR family transcriptional regulator [Lysinibacillus]	196	202	0	786.46	0.0014712	1.87066	2	12	0.166667	182.901	0.0536081	2.05361	FALSE	TRUE	300	170	55.4473
F:\25-03-2022\20220324-TEST BROTH-POS-00.d	1973	scanId=1113217		18.5535	533.255	625.811	2	1064.49	36	2798.19	K.LEM(oxidation of M)IVDDSK.V	LEMIVDDSK	WP_012291989.1 MULTISPECIES: P-II family nitrogen regulator [Lysinibacillus]	61	69	0	1064.51	-0.0112733	-10.5902	2	16	0.125	149.965	0.0535937	2.05359	TRUE	FALSE	301	170	55.4473
F:\25-03-2022\20220324-TEST BROTH-POS-00.d	4350	scanId=2485339		41.4222	1206.12	1975.81	2	2410.23	92	6871.65	K.ILGMNGEQILDLFLM(oxidation of M)GRGVYR.K	ILGMNGEQILDLFLMGRGVYR	DECOY_WP_012295242.1 MULTISPECIES: RNA polymerase sigma factor RpoD [Lysinibacillus]	201	221	1	2410.25	-0.0221863	-9.20497	2	40	0.05	365.888	0.053246	2.05325	FALSE	TRUE	301	171	55.4473
F:\25-03-2022\20220324-TEST BROTH-POS-00.d	2914	scanId=1671493		27.8581	494.291	1294.79	2	986.568	67	5201.03	K.ALSRGKNNK.L	ALSRGKNNK	WP_012292261.1 MULTISPECIES: site-specific integrase [Lysinibacillus]	243	251	2	986.562	0.00545432	5.52861	2	16	0.125	276.877	0.053235	2.05324	TRUE	FALSE	302	171	55.4473
F:\25-03-2022\20220324-TEST BROTH-POS-00.d	4566	scanId=2592080		43.2012	809.908	4116.8	2	1617.8	97	6518.12	K.YIDEILAFLPSSHN.-	YIDEILAFLPSSHN	WP_031417798.1 MULTISPECIES: tetratricopeptide repeat protein [Lysinibacillus]	494	507	0	1617.8	-0.00161029	-0.995358	2	26	0.0769231	342.578	0.0525579	2.05256	TRUE	FALSE	303	171	55.4473
F:\25-03-2022\20220324-TEST BROTH-POS-00.d	4127	scanId=2371308		39.5217	910.975	1629.86	2	1819.94	82	5939.11	K.GELNEAIYEIISTNVR.L	GELNEAIYEIISTNVR	WP_012293860.1 MULTISPECIES: hydantoinase B/oxoprolinase family protein [Lysinibacillus]	161	176	0	1819.93	0.00356433	1.9585	2	30	0.0666667	311.212	0.0524004	2.0524	TRUE	FALSE	304	171	55.4473
F:\25-03-2022\20220324-TEST BROTH-POS-00.d	2869	scanId=1646063		27.4342	308.207	1295.78	2	614.4	45	4128.27	R.KGGLLK.E	KGGLLK	WP_012291832.1 MULTISPECIES: DNA topoisomerase (ATP-hydrolyzing) subunit B [Lysinibacillus]	310	315	1	614.412	-0.0118164	-19.232	2	10	0.2	216.052	0.0523347	2.05233	TRUE	FALSE	305	171	55.4473
F:\25-03-2022\20220324-TEST BROTH-POS-00.d	3144	scanId=1807719		30.1285	472.779	1724.15	2	943.544	68	5621.53	R.KIEDQIAK.I	KIEDQIAK	WP_031416550.1 MULTISPECIES: GTPase HflX [Lysinibacillus]	174	181	1	943.534	0.00973485	10.3174	2	14	0.142857	289.857	0.0515619	2.05156	TRUE	FALSE	306	171	55.4473
F:\25-03-2022\20220324-TEST BROTH-POS-00.d	1919	scanId=1082737		18.0455	386.719	1187.8	2	771.424	41	3807.45	K.GIETAGPK.Y	GIETAGPK	WP_012293985.1 MULTISPECIES: DUF917 domain-containing protein [Lysinibacillus]	337	344	0	771.413	0.0112828	14.6262	2	14	0.142857	196.101	0.0515046	2.0515	TRUE	FALSE	307	171	55.4473
F:\25-03-2022\20220324-TEST BROTH-POS-00.d	2153	scanId=1221912		20.3651	660.849	603.937	2	1319.68	49	3874.29	R.NVSELVEFLDR.G	NVSELVEFLDR	DECOY_WP_012296132.1 MULTISPECIES: transporter substrate-binding domain-containing protein [Lysinibacillus]	3	13	0	1319.67	0.0110968	8.40874	2	20	0.1	198.443	0.0512205	2.05122	FALSE	TRUE	307	172	55.7716
F:\25-03-2022\20220324-TEST BROTH-POS-00.d	3994	scanId=2300795		38.3464	718.87	1294.9	2	1435.73	87	6274.11	R.ETM(oxidation of M)KLSDALTRR.G	ETMKLSDALTRR	DECOY_WP_012292243.1 MULTISPECIES: central glycolytic genes regulator [Lysinibacillus]	303	314	2	1435.75	-0.0194955	-13.5786	2	22	0.0909091	320.087	0.0510171	2.05102	FALSE	TRUE	307	173	56.0958
F:\25-03-2022\20220324-TEST BROTH-POS-00.d	4791	scanId=2707746		45.129	682.873	2246.43	2	1363.73	99	7146.61	K.VTDIPLIQM(oxidation of M)YR.F	VTDIPLIQMYR	DECOY_WP_012292629.1 MULTISPECIES: EAL domain-containing protein [Lysinibacillus]	79	89	0	1363.72	0.0148717	10.9053	2	20	0.1	363.757	0.0508992	2.0509	FALSE	TRUE	307	174	56.4201
F:\25-03-2022\20220324-TEST BROTH-POS-00.d	3589	scanId=2074099		34.5682	679.35	651.939	2	1356.69	55	3405	R.NIGDNLSGTPNKK.L	NIGDNLSGTPNKK	DECOY_WP_012294185.1 MULTISPECIES: DUF6366 family protein [Lysinibacillus]	36	48	1	1356.7	-0.0146504	-10.7986	2	24	0.0833333	173.089	0.0508337	2.05083	FALSE	TRUE	307	175	56.7443
F:\25-03-2022\20220324-TEST BROTH-POS-00.d	5774	scanId=3275109		54.585	890.958	1086.52	2	1779.9	90	5870.13	K.VLLDIGERHGNAAMER.I	VLLDIGERHGNAAMER	DECOY_WP_012293825.1 MULTISPECIES: type II pantothenate kinase [Lysinibacillus]	118	133	1	1779.91	-0.00434561	-2.44148	2	30	0.0666667	298.353	0.0508257	2.05083	FALSE	TRUE	307	176	56.8833
F:\25-03-2022\20220324-TEST BROTH-POS-00.d	2912	scanId=1670109		27.835	607.339	1202.64	2	1212.66	67	4880.53	K.VLQLSGGQQQR.V	VLQLSGGQQQR	WP_012293796.1 MULTISPECIES: ABC transporter ATP-binding protein [Lysinibacillus]	140	150	0	1212.66	0.0061461	5.06829	2	20	0.1	247.361	0.0506833	2.05068	TRUE	FALSE	308	176	56.8833
F:\25-03-2022\20220324-TEST BROTH-POS-00.d	2232	scanId=1269771		21.1627	465.782	1097.28	2	929.549	33	1846.56	K.KSLDALRK.K	KSLDALRK	DECOY_WP_031418899.1 MULTISPECIES: UDP-N-acetylmuramoyl-L-alanyl-D-glutamate--2,6-diaminopimelate ligase [Lysinibacillus]	258	265	2	929.566	-0.0170592	-18.3518	2	14	0.142857	93.2917	0.0505219	2.05052	FALSE	TRUE	308	177	57.1586
F:\25-03-2022\20220324-TEST BROTH-POS-00.d	1077	scanId=587093		9.78475	408.22	748.898	2	814.426	51	4352.04	R.GTGVPQEK.Y	GTGVPQEK	DECOY_WP_031419559.1 MULTISPECIES: GNAT family N-acetyltransferase [Lysinibacillus]	85	92	0	814.418	0.00753853	9.25634	2	14	0.142857	219.718	0.0504861	2.05049	FALSE	TRUE	308	178	57.1586
F:\25-03-2022\20220324-TEST BROTH-POS-00.d	4806	scanId=2714970		45.2494	718.911	2969.14	2	1435.81	84	5736.32	K.AIVFIGTNKSGSSR.E	AIVFIGTNKSGSSR	WP_206701034.1 MULTISPECIES: ATP-grasp domain-containing protein [Lysinibacillus]	3	16	1	1435.78	0.0283974	19.7784	2	26	0.0769231	288.53	0.0502989	2.0503	TRUE	FALSE	309	178	57.1586
F:\25-03-2022\20220324-TEST BROTH-POS-00.d	3080	scanId=1770714		29.5118	607.338	811.969	2	1212.66	62	4192.33	K.GIHVSLPTAYR.K	GIHVSLPTAYR	WP_012292636.1 MULTISPECIES: glycerophosphodiester phosphodiesterase [Lysinibacillus]	180	190	0	1212.66	-0.000774998	-0.639088	2	20	0.1	210.637	0.0502435	2.05024	TRUE	FALSE	310	178	57.1586
F:\25-03-2022\20220324-TEST BROTH-POS-00.d	3171	scanId=1824778		30.4128	738.386	563.199	2	1474.76	44	3351.74	K.RTKLQDELSEEK.R	RTKLQDELSEEK	DECOY_WP_012292409.1 MULTISPECIES: DUF5808 domain-containing protein [Lysinibacillus]	136	147	2	1474.76	-0.00547259	-3.71083	2	22	0.0909091	168.057	0.0501401	2.05014	FALSE	TRUE	310	179	57.1925
F:\25-03-2022\20220324-TEST BROTH-POS-00.d	3671	scanId=2119408		35.3233	584.832	894.388	2	1167.65	32	2349.58	K.ELPGIVALNDK.-	ELPGIVALNDK	WP_012292245.1 MULTISPECIES: phosphoglycerate kinase [Lysinibacillus]	384	394	0	1167.65	-0.00137489	-1.17749	2	20	0.1	117.807	0.0501397	2.05014	TRUE	FALSE	311	179	57.1925
F:\25-03-2022\20220324-TEST BROTH-POS-00.d	6123	scanId=3474571		57.9094	1295.14	1391.34	2	2588.26	91	5286.59	R.NVSELVEFLDRGYFKTSLENTK.K	NVSELVEFLDRGYFKTSLENTK	DECOY_WP_012296132.1 MULTISPECIES: transporter substrate-binding domain-containing protein [Lysinibacillus]	3	24	2	2588.31	-0.0507653	-19.6133	2	42	0.047619	261.512	0.0494671	2.04947	FALSE	TRUE	311	180	57.1925
F:\25-03-2022\20220324-TEST BROTH-POS-00.d	4073	scanId=2342949		39.049	584.808	1636	2	1167.6	77	5643.18	K.KYTAKTAEEK.Q	KYTAKTAEEK	WP_107921989.1 MULTISPECIES: ArdC-like ssDNA-binding domain-containing protein [Lysinibacillus]	7	16	2	1167.61	-0.0113843	-9.75006	2	18	0.111111	277.411	0.0491586	2.04916	TRUE	FALSE	312	180	57.1925
F:\25-03-2022\20220324-TEST BROTH-POS-00.d	5115	scanId=2886269		48.1043	806.963	1576.31	2	1611.91	81	5177	K.EPTKEVVALGTANRK.A	EPTKEVVALGTANRK	DECOY_WP_089986081.1 MULTISPECIES: vitamin B12-dependent ribonucleotide reductase [Lysinibacillus]	707	721	2	1611.89	0.017517	10.8674	2	28	0.0714286	254.028	0.0490686	2.04907	FALSE	TRUE	312	181	57.1925
F:\25-03-2022\20220324-TEST BROTH-POS-00.d	1802	scanId=1014185		16.903	423.241	928.521	2	844.468	85	6061.8	R.SALTPGATK.L	SALTPGATK	DECOY_WP_012295754.1 MULTISPECIES: amidohydrolase [Lysinibacillus]	256	264	0	844.465	0.00259084	3.06802	2	16	0.125	296.884	0.0489762	2.04898	FALSE	TRUE	312	182	57.1925
F:\25-03-2022\20220324-TEST BROTH-POS-00.d	4941	scanId=2788388		46.473	729.935	987.45	2	1457.86	85	5817.2	R.LLTMIMILINRK.K	LLTMIMILINRK	WP_012292153.1 MULTISPECIES: YafY family transcriptional regulator [Lysinibacillus]	6	17	1	1457.88	-0.0273095	-18.7323	2	22	0.0909091	283.85	0.0487949	2.04879	TRUE	FALSE	313	182	57.1925
F:\25-03-2022\20220324-TEST BROTH-POS-00.d	2643	scanId=1513098		25.2182	515.793	774.209	2	1029.57	37	2690.05	R.FAIDPVLQK.H	FAIDPVLQK	WP_031417987.1 MULTISPECIES: ubiquinol-cytochrome c reductase iron-sulfur subunit [Lysinibacillus]	34	42	0	1029.59	-0.0141301	-13.724	2	16	0.125	131.059	0.0487199	2.04872	TRUE	FALSE	314	182	57.1925
F:\25-03-2022\20220324-TEST BROTH-POS-00.d	2740	scanId=1570777		26.1795	451.271	853.256	2	900.528	62	4428.88	K.ANVKVDKK.V	ANVKVDKK	WP_217581450.1 MULTISPECIES: SagB/ThcOx family dehydrogenase [Lysinibacillus]	79	86	2	900.539	-0.0116497	-12.9363	2	14	0.142857	213.993	0.0483176	2.04832	TRUE	FALSE	315	182	57.1925
F:\25-03-2022\20220324-TEST BROTH-POS-00.d	3765	scanId=2172255		36.2041	905.974	1047.03	2	1809.93	52	3794.18	K.RLSSDDLPSQISHIDK.I	RLSSDDLPSQISHIDK	DECOY_WP_012295854.1 MULTISPECIES: MMPL family transporter [Lysinibacillus]	601	616	1	1809.92	0.0119417	6.5979	2	30	0.0666667	181.736	0.0478985	2.0479	FALSE	TRUE	315	183	57.1925
F:\25-03-2022\20220324-TEST BROTH-POS-00.d	2366	scanId=1350388		22.5063	601.328	1010.43	2	1200.64	35	1694.79	R.KLDDEGQLRK.R	KLDDEGQLRK	DECOY_WP_012292986.1 MULTISPECIES: DUF624 domain-containing protein [Lysinibacillus]	162	171	2	1200.65	-0.00493072	-4.10672	2	18	0.111111	81.1462	0.0478797	2.04788	FALSE	TRUE	315	184	57.1925
F:\25-03-2022\20220324-TEST BROTH-POS-00.d	2983	scanId=1712152		28.5357	644.837	1036.59	2	1287.66	49	3139.45	K.NGPMTLTQIWK.Y	NGPMTLTQIWK	WP_012293828.1 MULTISPECIES: MarR family transcriptional regulator [Lysinibacillus]	42	52	0	1287.66	-0.00444051	-3.4485	2	20	0.1	150.198	0.047842	2.04784	TRUE	FALSE	316	184	57.1925
F:\25-03-2022\20220324-TEST BROTH-POS-00.d	4105	scanId=2358792		39.3131	542.81	1409.62	2	1083.61	61	6249.96	K.AINRKQQAR.K	AINRKQQAR	WP_012291890.1 MULTISPECIES: septum formation initiator family protein [Lysinibacillus]	28	36	2	1083.63	-0.0203407	-18.771	2	16	0.125	297.906	0.0476653	2.04767	TRUE	FALSE	317	184	57.1925
F:\25-03-2022\20220324-TEST BROTH-POS-00.d	4815	scanId=2720288		45.338	610.869	1449.66	2	1219.72	78	6382.03	R.HIRKVNAQVR.K	HIRKVNAQVR	WP_012291841.1 MULTISPECIES: pyridoxal 5'-phosphate synthase lyase subunit PdxS [Lysinibacillus]	163	172	2	1219.73	-0.00344155	-2.82158	2	18	0.111111	304.079	0.0476462	2.04765	TRUE	FALSE	318	184	57.1925
F:\25-03-2022\20220324-TEST BROTH-POS-00.d	4045	scanId=2327988		38.7997	509.805	2122.41	2	1017.6	65	4585.99	K.FLNALAEIK.M	FLNALAEIK	WP_012293257.1 MULTISPECIES: GTP-sensing pleiotropic transcriptional regulator CodY [Lysinibacillus]	249	257	0	1017.59	0.00982456	9.65477	2	16	0.125	217.209	0.0473636	2.04736	TRUE	FALSE	319	184	57.1925
F:\25-03-2022\20220324-TEST BROTH-POS-00.d	3652	scanId=2109326		35.1553	781.385	1687.79	2	1560.75	68	4783.8	K.SSNAM(oxidation of M)EKAQLIPEK.L	SSNAMEKAQLIPEK	DECOY_WP_068983786.1 MULTISPECIES: glutamyl-tRNA reductase [Lysinibacillus]	52	65	1	1560.78	-0.0267771	-17.1562	2	26	0.0769231	224.521	0.0469335	2.04693	FALSE	TRUE	319	185	57.1925
F:\25-03-2022\20220324-TEST BROTH-POS-00.d	6432	scanId=3650262		60.8376	1119.64	1135.03	2	2237.26	120	7078.46	K.M(oxidation of M)VLQKKQFNEIYDLLAIR.V	MVLQKKQFNEIYDLLAIR	WP_012295425.1 MULTISPECIES: bifunctional (p)ppGpp synthetase/guanosine-3',5'-bis(diphosphate) 3'-pyrophosphohydrolase [Lysinibacillus]	252	269	2	2237.22	0.0380582	17.0113	2	34	0.0588235	330.876	0.0467441	2.04674	TRUE	FALSE	320	185	57.1925
F:\25-03-2022\20220324-TEST BROTH-POS-00.d	1473	scanId=816232		13.6037	475.259	767.903	2	948.504	31	2251.98	K.TMKDIDVK.G	TMKDIDVK	WP_012292245.1 MULTISPECIES: phosphoglycerate kinase [Lysinibacillus]	6	13	1	948.495	0.00876	9.23568	2	14	0.142857	104.613	0.0464536	2.04645	TRUE	FALSE	321	185	57.1925
F:\25-03-2022\20220324-TEST BROTH-POS-00.d	1760	scanId=989030		16.4837	387.703	583.696	2	773.391	46	3301.28	R.EQQLEK.T	EQQLEK	WP_012295923.1 MULTISPECIES: DinB family protein [Lysinibacillus]	88	93	0	773.392	-0.000824479	-1.06606	2	10	0.2	151.73	0.045961	2.04596	TRUE	FALSE	322	185	57.1925
F:\25-03-2022\20220324-TEST BROTH-POS-00.d	3746	scanId=2162006		36.0333	1112.55	471.342	2	2223.08	40	1669.41	R.TAEVEIKGNPVNPNIQDETR.L	TAEVEIKGNPVNPNIQDETR	DECOY_WP_012295418.1 MULTISPECIES: aspartate--tRNA ligase [Lysinibacillus]	492	511	1	2223.11	-0.0333506	-15.0018	2	38	0.0526316	76.35	0.0457346	2.04573	FALSE	TRUE	322	186	57.3236
F:\25-03-2022\20220324-TEST BROTH-POS-00.d	3887	scanId=2242924		37.3819	847.898	813.578	2	1693.78	50	2903.42	K.M(oxidation of M)TAIRENGQDPFGSR.F	MTAIRENGQDPFGSR	WP_198926864.1 MULTISPECIES: lysine--tRNA ligase [Lysinibacillus]	21	35	1	1693.78	-0.00222829	-1.31557	2	28	0.0714286	131.827	0.0454042	2.0454	TRUE	FALSE	323	186	57.3236
F:\25-03-2022\20220324-TEST BROTH-POS-00.d	4104	scanId=2358459		39.3075	727.867	1162.35	2	1453.72	96	6959.09	K.ILMDVRAYVSC[carbamidomethylation of C]K.L	ILMDVRAYVSCK	DECOY_WP_036162422.1 MULTISPECIES: D-alanine--D-alanine ligase [Lysinibacillus]	52	63	1	1453.74	-0.0226497	-15.5803	2	22	0.0909091	315.813	0.0453814	2.04538	FALSE	TRUE	323	187	57.6318
F:\25-03-2022\20220324-TEST BROTH-POS-00.d	4335	scanId=2478193		41.3031	650.367	1259.94	2	1298.72	59	3679.26	R.EVLLLYGEHVK.Q	EVLLLYGEHVK	DECOY_WP_031416090.1 MULTISPECIES: dTMP kinase [Lysinibacillus]	33	43	0	1298.72	-0.0039995	-3.07957	2	20	0.1	166.653	0.0452953	2.0453	FALSE	TRUE	323	188	57.94
F:\25-03-2022\20220324-TEST BROTH-POS-00.d	5008	scanId=2825146		47.0856	740.925	2325.33	2	1479.84	81	6867.57	K.GVSPRAAVIILDNR.Q	GVSPRAAVIILDNR	DECOY_WP_012296207.1 MULTISPECIES: replicative DNA helicase [Lysinibacillus]	240	253	1	1479.85	-0.0158536	-10.713	2	26	0.0769231	309.569	0.045077	2.04508	FALSE	TRUE	323	189	58.2482
F:\25-03-2022\20220324-TEST BROTH-POS-00.d	1784	scanId=1003601		16.7265	558.839	475.978	2	1115.66	40	2410.95	-.M(oxidation of M)NLVKIRVK.K	MNLVKIRVK	DECOY_WP_031416099.1 MULTISPECIES: G5 and 3D domain-containing protein [Lysinibacillus]	1	9	2	1115.68	-0.0217024	-19.4521	2	16	0.125	107.809	0.0447166	2.04472	FALSE	TRUE	323	190	58.3756
F:\25-03-2022\20220324-TEST BROTH-POS-00.d	3576	scanId=2066397		34.4398	551.298	1152.82	2	1100.58	61	4066.45	R.HLPAMLEYK.V	HLPAMLEYK	WP_036120740.1 MULTISPECIES: phBC6A51 family helix-turn-helix protein [Lysinibacillus]	57	65	0	1100.57	0.0119781	10.8835	2	16	0.125	181.669	0.044675	2.04468	TRUE	FALSE	324	190	58.3756
F:\25-03-2022\20220324-TEST BROTH-POS-00.d	2775	scanId=1590056		26.5008	545.781	913.693	2	1089.55	47	3555.35	K.AIEETSKGQK.A	AIEETSKGQK	DECOY_WP_031418999.1 MULTISPECIES: hypothetical protein [Lysinibacillus]	20	29	1	1089.57	-0.019478	-17.8768	2	18	0.111111	158.709	0.0446396	2.04464	FALSE	TRUE	324	191	58.5023
F:\25-03-2022\20220324-TEST BROTH-POS-00.d	2368	scanId=1351772		22.5294	538.269	864.025	2	1074.52	45	3860.82	R.ADIQNLMDR.L	ADIQNLMDR	WP_206700980.1 MULTISPECIES: DUF3006 family protein [Lysinibacillus]	75	83	0	1074.51	0.0101288	9.42639	2	16	0.125	172.249	0.0446145	2.04461	TRUE	FALSE	325	191	58.5023
F:\25-03-2022\20220324-TEST BROTH-POS-00.d	5681	scanId=3220726		53.6786	759.407	6700.15	2	1516.8	119	10874.8	R.LQEMIADALDLASK.N	LQEMIADALDLASK	DECOY_WP_126657037.1 MULTISPECIES: DNA repair protein RecN [Lysinibacillus]	184	197	0	1516.78	0.0192076	12.6634	2	26	0.0769231	483.378	0.0444492	2.04445	FALSE	TRUE	325	192	58.8086
F:\25-03-2022\20220324-TEST BROTH-POS-00.d	3415	scanId=1968335		32.8055	613.834	789.786	2	1225.65	42	2645.64	K.VENGVLTVPGNK.F	VENGVLTVPGNK	DECOY_WP_012295635.1 MULTISPECIES: thiol peroxidase [Lysinibacillus]	151	162	0	1225.67	-0.0129491	-10.565	2	22	0.0909091	117.349	0.0443557	2.04436	FALSE	TRUE	325	193	59.1149
F:\25-03-2022\20220324-TEST BROTH-POS-00.d	4494	scanId=2556066		42.601	1127.56	1465.42	2	2253.11	76	4862.72	K.RQYAAELLHTVFNHYYTK.S	RQYAAELLHTVFNHYYTK	DECOY_WP_012293845.1 MULTISPECIES: oligoendopeptidase F [Lysinibacillus]	141	158	1	2253.13	-0.02695	-11.9611	2	34	0.0588235	214.959	0.0442054	2.04421	FALSE	TRUE	325	194	59.4212
F:\25-03-2022\20220324-TEST BROTH-POS-00.d	1676	scanId=938821		15.6469	430.236	920.352	2	858.457	41	3431.18	R.NIEDGAIK.A	NIEDGAIK	DECOY_WP_031418536.1 MULTISPECIES: pyridoxal phosphate-dependent aminotransferase [Lysinibacillus]	165	172	0	858.445	0.0125634	14.6351	2	14	0.142857	151.478	0.0441473	2.04415	FALSE	TRUE	325	195	59.5443
F:\25-03-2022\20220324-TEST BROTH-POS-00.d	3267	scanId=1881733		31.3621	588.317	947.547	2	1174.62	51	3561.05	R.LALAM(oxidation of M)IEAAEK.D	LALAMIEAAEK	WP_012291901.1 MULTISPECIES: cysteine synthase A [Lysinibacillus]	48	58	0	1174.63	-0.00797614	-6.79036	2	20	0.1	156.755	0.0440193	2.04402	TRUE	FALSE	326	195	59.5443
F:\25-03-2022\20220324-TEST BROTH-POS-00.d	3832	scanId=2210470		36.841	767.419	1544.26	2	1532.82	72	4420.99	R.LQNLFTDQLNISK.-	LQNLFTDQLNISK	DECOY_WP_031419061.1 MULTISPECIES: RNA chaperone Hfq [Lysinibacillus]	64	76	0	1532.82	0.00321568	2.09789	2	24	0.0833333	193.505	0.0437697	2.04377	FALSE	TRUE	326	196	59.547
F:\25-03-2022\20220324-TEST BROTH-POS-00.d	5214	scanId=2946451		49.1074	1091.09	844.818	2	2180.16	64	4231.12	M.EILLKGFREDVLAEYMVR.K	EILLKGFREDVLAEYMVR	WP_012295519.1 MULTISPECIES: accessory gene regulator AgrB [Lysinibacillus]	2	19	2	2180.17	-0.00926929	-4.25164	2	34	0.0588235	184.782	0.0436722	2.04367	TRUE	FALSE	327	196	59.547
F:\25-03-2022\20220324-TEST BROTH-POS-00.d	2811	scanId=1612160		26.8692	745.367	561.43	2	1488.72	51	3541.23	K.KDPYPFTDLHEK.V	KDPYPFTDLHEK	DECOY_WP_036162774.1 MULTISPECIES: dihydrofolate reductase family protein [Lysinibacillus]	108	119	1	1488.72	-0.00614303	-4.12637	2	22	0.0909091	154.334	0.043582	2.04358	FALSE	TRUE	327	197	59.547
F:\25-03-2022\20220324-TEST BROTH-POS-00.d	1743	scanId=979113		16.3184	358.228	1207.66	2	714.442	54	5689.28	K.VTQVLR.Q	VTQVLR	WP_036161804.1 MULTISPECIES: aconitate hydratase AcnA [Lysinibacillus]	273	278	0	714.439	0.00295296	4.13325	2	10	0.2	247.004	0.0434157	2.04342	TRUE	FALSE	328	197	59.547
F:\25-03-2022\20220324-TEST BROTH-POS-00.d	1751	scanId=983712		16.3951	464.755	624.036	2	927.496	28	2191.64	K.NVNHFIGK.E	NVNHFIGK	WP_012296123.1 MULTISPECIES: RNA ligase family protein [Lysinibacillus]	28	35	0	927.493	0.00306491	3.30451	2	14	0.142857	95.1382	0.0434096	2.04341	TRUE	FALSE	329	197	59.547
F:\25-03-2022\20220324-TEST BROTH-POS-00.d	4394	scanId=2506068		41.7677	553.833	2054.46	2	1105.65	62	4765.08	R.ITDFIEKIK.L	ITDFIEKIK	DECOY_WP_012292635.1 MULTISPECIES: AAA family ATPase [Lysinibacillus]	108	116	1	1105.64	0.0135237	12.2316	2	16	0.125	206.638	0.0433651	2.04337	FALSE	TRUE	329	198	59.547
F:\25-03-2022\20220324-TEST BROTH-POS-00.d	4539	scanId=2578860		42.9809	809.909	1345.98	2	1617.8	75	4782.84	R.VDLMMENGLLQEVK.G	VDLMMENGLLQEVK	WP_004225827.1 MULTISPECIES: tRNA (adenosine(37)-N6)-dimethylallyltransferase MiaA [Lysinibacillus]	219	232	0	1617.81	-0.00781326	-4.82953	2	26	0.0769231	207.097	0.0433	2.0433	TRUE	FALSE	330	198	59.547
F:\25-03-2022\20220324-TEST BROTH-POS-00.d	4765	scanId=2694218		44.9035	880.445	1420.94	2	1758.88	107	7288.29	R.EIDVEVVVEDIPTFR.K	EIDVEVVVEDIPTFR	WP_012291834.1 MULTISPECIES: HD-GYP domain-containing protein [Lysinibacillus]	67	81	0	1758.9	-0.028297	-16.0879	2	28	0.0714286	313.452	0.0430076	2.04301	TRUE	FALSE	331	198	59.547
F:\25-03-2022\20220324-TEST BROTH-POS-00.d	2341	scanId=1335151		22.2524	472.769	1267.89	2	943.524	57	3879.43	K.DLKEVVNK.Q	DLKEVVNK	DECOY_WP_036161040.1 MULTISPECIES: helix-turn-helix transcriptional regulator [Lysinibacillus]	70	77	1	943.534	-0.0101278	-10.7339	2	14	0.142857	166.122	0.0428213	2.04282	FALSE	TRUE	331	199	59.6675
F:\25-03-2022\20220324-TEST BROTH-POS-00.d	4018	scanId=2314695		38.5781	718.873	1114.89	2	1435.73	69	4451.32	R.DNKLFARGASDDK.G	DNKLFARGASDDK	WP_012292640.1 MULTISPECIES: dipeptidase [Lysinibacillus]	112	124	2	1435.71	0.0260489	18.1436	2	24	0.0833333	189.721	0.0426213	2.04262	TRUE	FALSE	332	199	59.6675
F:\25-03-2022\20220324-TEST BROTH-POS-00.d	3251	scanId=1872150		31.2024	599.327	552.651	2	1196.64	50	3394.58	K.LSNFQAVYKK.I	LSNFQAVYKK	DECOY_WP_012291949.1 MULTISPECIES: DUF4132 domain-containing protein [Lysinibacillus]	888	897	1	1196.66	-0.0157675	-13.1763	2	18	0.111111	143.952	0.0424066	2.04241	FALSE	TRUE	332	200	59.7864
F:\25-03-2022\20220324-TEST BROTH-POS-00.d	1806	scanId=1016400		16.9399	379.235	1145.99	2	756.455	69	7194.09	K.KGTLNPK.K	KGTLNPK	WP_012295611.1 MULTISPECIES: protease modulator HflC [Lysinibacillus]	39	45	1	756.449	0.00578263	7.64444	2	12	0.166667	304.85	0.0423751	2.04238	TRUE	FALSE	333	200	59.7864
F:\25-03-2022\20220324-TEST BROTH-POS-00.d	4050	scanId=2330372		38.8394	1106.06	889.569	2	2210.1	58	4020.79	K.IYM(oxidation of M)RQAGPYYGAIHRASLK.F	IYMRQAGPYYGAIHRASLK	DECOY_WP_012292454.1 MULTISPECIES: FAD-dependent oxidoreductase [Lysinibacillus]	72	90	2	2210.14	-0.0425805	-19.266	2	36	0.0555556	168.784	0.0419779	2.04198	FALSE	TRUE	333	201	59.7864
F:\25-03-2022\20220324-TEST BROTH-POS-00.d	2378	scanId=1357757		22.6291	589.305	545.97	2	1176.6	35	2992.98	K.GAVTIATNM(oxidation of M)AGR.G	GAVTIATNMAGR	WP_036225924.1 MULTISPECIES: preprotein translocase subunit SecA [Lysinibacillus]	478	489	0	1176.59	0.00348787	2.96438	2	22	0.0909091	125.261	0.0418516	2.04185	TRUE	FALSE	334	201	59.7864
F:\25-03-2022\20220324-TEST BROTH-POS-00.d	3850	scanId=2220771		37.0127	487.286	995.29	2	972.558	52	3997.68	K.KANTEALVK.E	KANTEALVK	DECOY_WP_012292327.1 MULTISPECIES: glycosyl hydrolase family 18 protein [Lysinibacillus]	76	84	1	972.56	-0.00236714	-2.43393	2	16	0.125	166.177	0.0415684	2.04157	FALSE	TRUE	334	202	59.7864
F:\25-03-2022\20220324-TEST BROTH-POS-00.d	3827	scanId=2207368		36.7893	432.741	1452.43	2	863.467	69	6488.24	R.GVVEVYAK.L	GVVEVYAK	WP_036162221.1 MULTISPECIES: ATP-dependent RecD-like DNA helicase [Lysinibacillus]	376	383	0	863.475	-0.00779786	-9.03079	2	14	0.142857	268.384	0.0413647	2.04136	TRUE	FALSE	335	202	59.7864
F:\25-03-2022\20220324-TEST BROTH-POS-00.d	3683	scanId=2126223		35.4369	577.331	1522.68	2	1152.65	61	4293.28	-.MLLIHELER.I	MLLIHELER	WP_048393118.1 MULTISPECIES: sigma-70 family RNA polymerase sigma factor [Lysinibacillus]	1	9	0	1152.63	0.014186	12.3074	2	16	0.125	177.337	0.0413056	2.04131	TRUE	FALSE	336	202	59.7864
F:\25-03-2022\20220324-TEST BROTH-POS-00.d	1937	scanId=1093270		18.221	382.689	831.088	2	763.363	63	5282.44	K.GISGSSEK.I	GISGSSEK	DECOY_WP_012291919.1 MULTISPECIES: 4-hydroxy-tetrahydrodipicolinate synthase [Lysinibacillus]	131	138	0	763.371	-0.00804462	-10.5383	2	14	0.142857	217.565	0.0411865	2.04119	FALSE	TRUE	336	203	59.7864
F:\25-03-2022\20220324-TEST BROTH-POS-00.d	2179	scanId=1237531		20.6254	523.785	964.228	2	1045.56	40	2684.73	R.GIGSGNGKTAGK.G	GIGSGNGKTAGK	WP_008181708.1 MULTISPECIES: 50S ribosomal protein L15 [Lysinibacillus]	22	33	1	1045.55	0.00352895	3.3752	2	22	0.0909091	110.463	0.0411447	2.04114	TRUE	FALSE	337	203	59.7864
F:\25-03-2022\20220324-TEST BROTH-POS-00.d	4619	scanId=2617927		43.632	611.358	1630.73	2	1220.7	71	5237.74	-.MKAIVFIGTNK.S	MKAIVFIGTNK	WP_206701034.1 MULTISPECIES: ATP-grasp domain-containing protein [Lysinibacillus]	1	11	1	1220.7	0.00554529	4.54273	2	20	0.1	215.277	0.041101	2.0411	TRUE	FALSE	338	203	59.7864
F:\25-03-2022\20220324-TEST BROTH-POS-00.d	5267	scanId=2977755		49.6291	759.885	1554.24	2	1517.75	82	5207.53	R.DTLTDLVDELQEK.L	DTLTDLVDELQEK	DECOY_WP_012295242.1 MULTISPECIES: RNA polymerase sigma factor RpoD [Lysinibacillus]	61	73	0	1517.75	0.00887927	5.8503	2	24	0.0833333	211.834	0.0406784	2.04068	FALSE	TRUE	338	204	60.0809
F:\25-03-2022\20220324-TEST BROTH-POS-00.d	4653	scanId=2635533		43.9254	529.307	1781.86	2	1056.6	80	6510.6	R.IDMLIIDPK.L	IDMLIIDPK	DECOY_WP_237497374.1 MULTISPECIES: response regulator transcription factor [Lysinibacillus]	147	155	0	1056.59	0.0113508	10.7429	2	16	0.125	262.886	0.0403781	2.04038	FALSE	TRUE	338	205	60.3754
F:\25-03-2022\20220324-TEST BROTH-POS-00.d	4194	scanId=2404972		40.0827	542.807	1996.15	2	1083.6	73	5902.02	K.DIAQPIVSNK.M	DIAQPIVSNK	DECOY_WP_012292160.1 MULTISPECIES: DUF445 family protein [Lysinibacillus]	74	83	0	1083.59	0.00737669	6.80762	2	18	0.111111	238.169	0.0403539	2.04035	FALSE	TRUE	338	206	60.4281
F:\25-03-2022\20220324-TEST BROTH-POS-00.d	3805	scanId=2195957		36.5992	810.427	1090.59	2	1618.84	54	3192.21	-.MVNLLLKQM(oxidation of M)EQTR.E	MVNLLLKQMEQTR	WP_010858200.1 MULTISPECIES: aspartyl-phosphate phosphatase Spo0E family protein [Lysinibacillus]	1	13	1	1618.85	-0.0139946	-8.64478	2	24	0.0833333	127.251	0.039863	2.03986	TRUE	FALSE	339	206	60.4281
F:\25-03-2022\20220324-TEST BROTH-POS-00.d	2097	scanId=1188842		19.8139	724.362	644.233	2	1446.71	33	2456.42	R.LAEVSEVESDLEK.A	LAEVSEVESDLEK	DECOY_WP_012295491.1 MULTISPECIES: trigger factor [Lysinibacillus]	162	174	0	1446.71	0.000331356	0.229041	2	24	0.0833333	97.5644	0.0397182	2.03972	FALSE	TRUE	339	207	60.4281
F:\25-03-2022\20220324-TEST BROTH-POS-00.d	3079	scanId=1770382		29.5062	727.347	532.519	2	1452.68	44	3082.11	-.MEFMALENEIVK.L	MEFMALENEIVK	WP_012292547.1 MULTISPECIES: GNAT family N-acetyltransferase [Lysinibacillus]	1	12	0	1452.7	-0.0189566	-13.0492	2	22	0.0909091	122.128	0.0396249	2.03962	TRUE	FALSE	340	207	60.4281
F:\25-03-2022\20220324-TEST BROTH-POS-00.d	3904	scanId=2252174		37.5361	360.206	2748.01	2	718.398	66	6751.41	R.GEATLTK.D	GEATLTK	WP_217580507.1 MULTISPECIES: dihydrolipoyl dehydrogenase [Lysinibacillus]	111	117	0	718.386	0.0115451	16.0709	2	12	0.166667	264.534	0.039182	2.03918	TRUE	FALSE	341	207	60.4281
F:\25-03-2022\20220324-TEST BROTH-POS-00.d	3949	scanId=2275551		37.9257	496.303	2119.5	2	990.592	90	6498.27	-.M(oxidation of M)LLLKVMK.E	MLLLKVMK	DECOY_WP_036161940.1 MULTISPECIES: TetR/AcrR family transcriptional regulator [Lysinibacillus]	1	8	1	990.597	-0.00480299	-4.84859	2	14	0.142857	251.824	0.0387524	2.03875	FALSE	TRUE	341	208	60.5425
F:\25-03-2022\20220324-TEST BROTH-POS-00.d	3016	scanId=1732591		28.8764	606.329	1975.11	2	1210.64	73	4739.61	K.AANQFTKLYR.Q	AANQFTKLYR	WP_051147711.1 MULTISPECIES: MarR family transcriptional regulator [Lysinibacillus]	20	29	1	1210.65	-0.00222938	-1.84148	2	18	0.111111	183.209	0.0386549	2.03865	TRUE	FALSE	342	208	60.5425
F:\25-03-2022\20220324-TEST BROTH-POS-00.d	3528	scanId=2037590		33.9597	586.835	1394.33	2	1171.66	52	3460.68	K.EQKLREEIK.R	EQKLREEIK	DECOY_WP_012293016.1 MULTISPECIES: efflux RND transporter permease subunit [Lysinibacillus]	436	444	2	1171.66	-0.000832979	-0.710942	2	16	0.125	133.243	0.0385021	2.0385	FALSE	TRUE	342	209	60.7057
F:\25-03-2022\20220324-TEST BROTH-POS-00.d	3838	scanId=2213904		36.8983	766.396	1047.68	2	1530.78	88	5619.09	K.LPMPSSAITETTQR.Q	LPMPSSAITETTQR	DECOY_WP_031418999.1 MULTISPECIES: hypothetical protein [Lysinibacillus]	51	64	0	1530.77	0.00620825	4.05563	2	26	0.0769231	216.231	0.0384815	2.03848	FALSE	TRUE	342	210	60.7057
F:\25-03-2022\20220324-TEST BROTH-POS-00.d	4445	scanId=2531586		42.193	1287.65	816.926	2	2573.29	86	5441.19	M.MTINANSPSPFSKTQQLRIDVAR.E	MTINANSPSPFSKTQQLRIDVAR	WP_031418523.1 MULTISPECIES: DEAD/DEAH box helicase [Lysinibacillus]	2	24	2	2573.34	-0.0499541	-19.4122	2	44	0.0454545	208.881	0.0383888	2.03839	TRUE	FALSE	343	210	60.7057
F:\25-03-2022\20220324-TEST BROTH-POS-00.d	5055	scanId=2850816		47.5135	770.921	912.074	2	1539.83	70	4521.31	K.TIKHSQFAKHDTK.L	TIKHSQFAKHDTK	WP_036161937.1 MULTISPECIES: DUF3995 domain-containing protein [Lysinibacillus]	109	121	2	1539.82	0.0123053	7.99142	2	24	0.0833333	171.848	0.0380086	2.03801	TRUE	FALSE	344	210	60.7057
F:\25-03-2022\20220324-TEST BROTH-POS-00.d	4834	scanId=2730161		45.5025	672.409	2893.49	2	1342.8	96	7067	R.GTFIKKIFSFR.E	GTFIKKIFSFR	DECOY_WP_012295708.1 MULTISPECIES: NERD domain-containing protein [Lysinibacillus]	259	269	2	1342.78	0.0268039	19.9616	2	20	0.1	268.157	0.037945	2.03794	FALSE	TRUE	344	211	60.7057
F:\25-03-2022\20220324-TEST BROTH-POS-00.d	5995	scanId=3401451		56.6907	948.483	877.114	2	1894.95	62	3467.18	K.ALMMNGKMANITLMNDK.D	ALMMNGKMANITLMNDK	WP_012295204.1 MULTISPECIES: cellulose biosynthesis cyclic di-GMP-binding regulatory protein BcsB [Lysinibacillus]	507	523	1	1894.91	0.0373331	19.7018	2	32	0.0625	131.482	0.0379218	2.03792	TRUE	FALSE	345	211	60.7057
F:\25-03-2022\20220324-TEST BROTH-POS-00.d	4594	scanId=2605498		43.4248	638.848	2531.76	2	1275.68	88	6994.91	K.QDLEDLGIVFK.D	QDLEDLGIVFK	WP_031417705.1 MULTISPECIES: Fe-S cluster assembly protein SufB [Lysinibacillus]	134	144	0	1275.67	0.0105686	8.28473	2	20	0.1	265.167	0.0379085	2.03791	TRUE	FALSE	346	211	60.7057
F:\25-03-2022\20220324-TEST BROTH-POS-00.d	5012	scanId=2827362		47.1226	723.422	1498.93	2	1444.83	91	5904.98	K.VLLWLDALYSPR.G	VLLWLDALYSPR	DECOY_WP_036160718.1 MULTISPECIES: rod shape-determining protein RodA [Lysinibacillus]	242	253	0	1444.81	0.021866	15.1342	2	22	0.0909091	222.694	0.0377129	2.03771	FALSE	TRUE	346	212	60.9934
F:\25-03-2022\20220324-TEST BROTH-POS-00.d	1250	scanId=687532		11.4587	258.66	2140.65	2	515.305	52	6469.72	R.LLDR.M	LLDR	DECOY_WP_012295369.1 MULTISPECIES: DNA internalization-related competence protein ComEC/Rec2 [Lysinibacillus]	165	168	0	515.307	-0.00163851	-3.17967	2	6	0.333333	243.537	0.0376426	2.03764	FALSE	TRUE	346	213	61.1045
F:\25-03-2022\20220324-TEST BROTH-POS-00.d	4963	scanId=2800116		46.6685	716.436	2899.6	2	1430.86	95	6870.15	K.IESLKPVLLYTR.V	IESLKPVLLYTR	WP_012293782.1 MULTISPECIES: IclR family transcriptional regulator [Lysinibacillus]	122	133	0	1430.85	0.00676905	4.73079	2	22	0.0909091	258.373	0.0376081	2.03761	TRUE	FALSE	347	213	61.1045
F:\25-03-2022\20220324-TEST BROTH-POS-00.d	1507	scanId=837072		13.9511	552.745	1062.19	2	1103.48	45	4030.84	-.MEGVPVDDDK.L	MEGVPVDDDK	DECOY_WP_012294204.1 MULTISPECIES: MarR family transcriptional regulator [Lysinibacillus]	1	10	0	1103.48	-0.00497971	-4.51273	2	18	0.111111	150.975	0.0374549	2.03745	FALSE	TRUE	347	214	61.2149
F:\25-03-2022\20220324-TEST BROTH-POS-00.d	3605	scanId=2083181		34.7196	689.824	1402.59	2	1377.63	77	5799.55	K.SEYIELNEEPR.L	SEYIELNEEPR	WP_217581244.1 MULTISPECIES: GNAT family N-acetyltransferase [Lysinibacillus]	183	193	0	1377.64	-0.00813598	-5.90573	2	20	0.1	217.134	0.0374398	2.03744	TRUE	FALSE	348	214	61.2149
F:\25-03-2022\20220324-TEST BROTH-POS-00.d	4618	scanId=2617594		43.6264	619.869	2932.62	2	1237.72	77	5847.44	K.NQRVLPTAALR.I	NQRVLPTAALR	DECOY_WP_036161116.1 MULTISPECIES: PTS sugar transporter subunit IIA [Lysinibacillus]	119	129	1	1237.73	-0.00168218	-1.35909	2	20	0.1	217.109	0.0371288	2.03713	FALSE	TRUE	348	215	61.501
F:\25-03-2022\20220324-TEST BROTH-POS-00.d	6466	scanId=3670648		61.1773	801.482	1776.53	2	1600.95	127	7675.51	K.KFLTLEAELLRIR.A	KFLTLEAELLRIR	DECOY_WP_085961712.1 MULTISPECIES: IS3 family transposase [Lysinibacillus]	317	329	2	1600.97	-0.0176889	-11.0489	2	24	0.0833333	284.193	0.037026	2.03703	FALSE	TRUE	348	216	61.61
F:\25-03-2022\20220324-TEST BROTH-POS-00.d	6445	scanId=3657796		60.9631	792.928	1843.53	2	1583.84	153	10542.2	R.EQGIHMITLKQMR.R	EQGIHMITLKQMR	WP_227256892.1 MULTISPECIES: agmatinase family protein [Lysinibacillus]	201	213	1	1583.83	0.0139125	8.78411	2	24	0.0833333	389.711	0.0369667	2.03697	TRUE	FALSE	349	216	61.61
F:\25-03-2022\20220324-TEST BROTH-POS-00.d	3563	scanId=2059031		34.3171	679.351	1732.94	2	1356.69	88	7028.01	R.NIGDNLSGTPNKK.L	NIGDNLSGTPNKK	DECOY_WP_012294185.1 MULTISPECIES: DUF6366 family protein [Lysinibacillus]	36	48	1	1356.7	-0.0127284	-9.38192	2	24	0.0833333	257.05	0.0365752	2.03658	FALSE	TRUE	349	217	61.8952
F:\25-03-2022\20220324-TEST BROTH-POS-00.d	5633	scanId=3192242		53.2039	1322.7	1142.25	2	2643.38	96	4874.74	K.VALLRIEC[carbamidomethylation of C]IKGC[carbamidomethylation of C]IEEPLFQEVK.G	VALLRIECIKGCIEEPLFQEVK	DECOY_WP_012293599.1 MULTISPECIES: aminotransferase class V-fold PLP-dependent enzyme [Lysinibacillus]	416	437	2	2643.41	-0.0361095	-13.6602	2	42	0.047619	178.291	0.0365744	2.03657	FALSE	TRUE	349	218	62.0028
F:\25-03-2022\20220324-TEST BROTH-POS-00.d	5307	scanId=3000201		50.0032	683.886	879.575	2	1365.76	82	5527.77	K.EGILRNHMIRK.D	EGILRNHMIRK	WP_012292547.1 MULTISPECIES: GNAT family N-acetyltransferase [Lysinibacillus]	152	162	2	1365.77	-0.00795145	-5.82197	2	20	0.1	200.77	0.0363203	2.03632	TRUE	FALSE	350	218	62.0028
F:\25-03-2022\20220324-TEST BROTH-POS-00.d	4739	scanId=2680423		44.6736	655.373	1865.09	2	1308.73	94	6911.37	K.LIVVTFDDFLK.F	LIVVTFDDFLK	DECOY_WP_048394289.1 MULTISPECIES: PP2C family protein-serine/threonine phosphatase [Lysinibacillus]	4	14	0	1308.73	-0.00109063	-0.833347	2	20	0.1	251.01	0.0363184	2.03632	FALSE	TRUE	350	219	62.2872
F:\25-03-2022\20220324-TEST BROTH-POS-00.d	2634	scanId=1507781		25.1295	429.261	991.633	2	856.507	43	3649.71	K.KELQALR.A	KELQALR	DECOY_WP_012293394.1 MULTISPECIES: PspA/IM30 family protein [Lysinibacillus]	16	22	1	856.513	-0.00582775	-6.80404	2	12	0.166667	132.092	0.0361925	2.03619	FALSE	TRUE	350	220	62.5716
F:\25-03-2022\20220324-TEST BROTH-POS-00.d	4768	scanId=2695934		44.9321	726.9	1232.07	2	1451.79	68	4744.31	R.SPQLHRSSRTQR.E	SPQLHRSSRTQR	DECOY_WP_036221298.1 MULTISPECIES: DUF1510 family protein [Lysinibacillus]	206	217	2	1451.77	0.0147968	10.1923	2	22	0.0909091	170.051	0.0358431	2.03584	FALSE	TRUE	350	221	62.8561
F:\25-03-2022\20220324-TEST BROTH-POS-00.d	2639	scanId=1510882		25.1812	858.464	672.501	2	1714.91	27	1470.99	K.ELRMTNLPSLSGEIR.I	ELRMTNLPSLSGEIR	DECOY_WP_012292051.1 MULTISPECIES: PrkA family serine protein kinase [Lysinibacillus]	458	472	1	1714.9	0.0100514	5.86123	2	28	0.0714286	52.1841	0.0354755	2.03548	FALSE	TRUE	350	222	63.1405
F:\25-03-2022\20220324-TEST BROTH-POS-00.d	5396	scanId=3053510		50.8917	1626.37	817.514	2	3250.73	79	4670.07	R.ELFVRNVISINGERGIMMLSSGMNEILTK.L	ELFVRNVISINGERGIMMLSSGMNEILTK	DECOY_WP_031418633.1 MULTISPECIES: ATP-binding protein [Lysinibacillus]	310	338	2	3250.69	0.0375205	11.5423	2	56	0.0357143	164.193	0.0351586	2.03516	FALSE	TRUE	350	223	63.2706
F:\25-03-2022\20220324-TEST BROTH-POS-00.d	4065	scanId=2338133		38.9688	498.783	5430.59	2	995.551	130	12716.1	K.HLPKM(oxidation of M)QAR.G	HLPKMQAR	DECOY_WP_012293128.1 MULTISPECIES: cytochrome c oxidase assembly factor CtaG [Lysinibacillus]	126	133	1	995.533	0.0173983	17.4764	2	14	0.142857	439.958	0.0345986	2.0346	FALSE	TRUE	350	224	63.2706
F:\25-03-2022\20220324-TEST BROTH-POS-00.d	2713	scanId=1554487		25.908	443.753	2977.21	2	885.491	46	5721.66	K.IAGLEVER.I	IAGLEVER	WP_012295327.1 MULTISPECIES: molecular chaperone DnaK [Lysinibacillus]	134	141	0	885.492	-0.00146645	-1.65609	2	14	0.142857	197.869	0.0345824	2.03458	TRUE	FALSE	351	224	63.2706
F:\25-03-2022\20220324-TEST BROTH-POS-00.d	2369	scanId=1352105		22.5349	472.774	686.92	2	943.534	47	3193.17	R.LEINNITK.K	LEINNITK	WP_012293496.1 MULTISPECIES: ABC transporter ATP-binding protein [Lysinibacillus]	3	10	0	943.534	0.000374283	0.396682	2	14	0.142857	110.283	0.0345372	2.03454	TRUE	FALSE	352	224	63.2706
F:\25-03-2022\20220324-TEST BROTH-POS-00.d	2013	scanId=1137041		18.9505	522.258	586.352	2	1042.5	58	4200.42	R.QEVVYDYK.A	QEVVYDYK	DECOY_WP_232901020.1 MULTISPECIES: cell wall-binding protein [Lysinibacillus]	1226	1233	0	1042.5	0.00450646	4.32275	2	14	0.142857	144.633	0.034433	2.03443	FALSE	TRUE	352	225	63.2706
F:\25-03-2022\20220324-TEST BROTH-POS-00.d	2418	scanId=1381527		23.0253	425.72	749.615	2	849.425	47	3315.37	K.EANELFK.K	EANELFK	WP_036160485.1 MULTISPECIES: AAA family ATPase [Lysinibacillus]	170	176	0	849.423	0.00174123	2.04989	2	12	0.166667	114.075	0.034408	2.03441	TRUE	FALSE	353	225	63.2706
F:\25-03-2022\20220324-TEST BROTH-POS-00.d	2711	scanId=1553103		25.8849	493.787	1041.88	2	985.559	36	2388.62	K.SGVIALDSPK.F	SGVIALDSPK	WP_012293136.1 MULTISPECIES: glycerophosphodiester phosphodiesterase [Lysinibacillus]	242	251	0	985.544	0.0147215	14.9375	2	18	0.111111	82.0896	0.034367	2.03437	TRUE	FALSE	354	225	63.2706
F:\25-03-2022\20220324-TEST BROTH-POS-00.d	4878	scanId=2752801		45.8799	721.39	3035.17	2	1440.77	73	6612.22	K.ELVQNVNTIGINK.E	ELVQNVNTIGINK	DECOY_WP_036161900.1 MULTISPECIES: ETX/MTX2 family pore-forming toxin [Lysinibacillus]	281	293	0	1440.79	-0.0284124	-19.72	2	24	0.0833333	226.761	0.0342943	2.03429	FALSE	TRUE	354	226	63.3728
F:\25-03-2022\20220324-TEST BROTH-POS-00.d	4146	scanId=2381222		39.6869	431.724	3805.7	2	861.433	102	8921.99	K.KMLGEER.R	KMLGEER	WP_012295454.1 MULTISPECIES: transcription repressor NadR [Lysinibacillus]	3	9	1	861.438	-0.00531727	-6.17255	2	12	0.166667	305.901	0.0342862	2.03429	TRUE	FALSE	355	226	63.3728
F:\25-03-2022\20220324-TEST BROTH-POS-00.d	3474	scanId=2004129		33.402	652.337	1098.04	2	1302.66	75	5725.64	K.ALSEWRIADDK.G	ALSEWRIADDK	DECOY_WP_012292363.1 MULTISPECIES: uroporphyrinogen-III C-methyltransferase [Lysinibacillus]	99	109	1	1302.66	0.00327433	2.51358	2	20	0.1	195.934	0.0342205	2.03422	FALSE	TRUE	355	227	63.4744
F:\25-03-2022\20220324-TEST BROTH-POS-00.d	3314	scanId=1908884		31.8146	707.9	2131.27	2	1413.79	93	7168.43	R.QSVTNPNTIISIK.S	QSVTNPNTIISIK	WP_012295327.1 MULTISPECIES: molecular chaperone DnaK [Lysinibacillus]	56	68	0	1413.78	0.00362359	2.56304	2	24	0.0833333	244.961	0.0341722	2.03417	TRUE	FALSE	356	227	63.4744
F:\25-03-2022\20220324-TEST BROTH-POS-00.d	2446	scanId=1398532		23.3087	404.2	1102.67	2	806.386	56	4008.69	R.ALEM(oxidation of M)AEK.A	ALEMAEK	DECOY_WP_038509878.1 MULTISPECIES: DnaD domain protein [Lysinibacillus]	77	83	0	806.384	0.00179236	2.22271	2	12	0.166667	136.787	0.0341227	2.03412	FALSE	TRUE	356	228	63.6759
F:\25-03-2022\20220324-TEST BROTH-POS-00.d	3952	scanId=2277144		37.9523	348.723	10222	2	695.431	71	7853.87	R.HVITVK.D	HVITVK	DECOY_WP_012292230.1 MULTISPECIES: thioredoxin-disulfide reductase [Lysinibacillus]	141	146	0	695.433	-0.0019384	-2.78733	2	10	0.2	265.182	0.0337645	2.03376	FALSE	TRUE	356	229	63.6759
F:\25-03-2022\20220324-TEST BROTH-POS-00.d	1422	scanId=785255		13.0875	357.217	772.04	2	712.419	37	3762.04	K.LVEAGPK.I	LVEAGPK	WP_012292539.1 MULTISPECIES: NAD(P)/FAD-dependent oxidoreductase [Lysinibacillus]	195	201	0	712.412	0.0075104	10.5422	2	12	0.166667	126.75	0.0336919	2.03369	TRUE	FALSE	357	229	63.6759
F:\25-03-2022\20220324-TEST BROTH-POS-00.d	2977	scanId=1708552		28.4757	508.284	1357.43	2	1014.55	55	3973.02	R.QVIVENEGK.A	QVIVENEGK	WP_012293911.1 MULTISPECIES: LutB/LldF family L-lactate oxidation iron-sulfur protein [Lysinibacillus]	388	396	0	1014.53	0.0188553	18.5852	2	16	0.125	133.696	0.0336508	2.03365	TRUE	FALSE	358	229	63.6759
F:\25-03-2022\20220324-TEST BROTH-POS-00.d	5206	scanId=2941298		49.0215	1211.13	640.355	2	2420.25	61	3680.56	R.VAGYPKHNEIVFYQKSADNIK.S	VAGYPKHNEIVFYQKSADNIK	DECOY_WP_012291915.1 MULTISPECIES: sigma-54-dependent Fis family transcriptional regulator [Lysinibacillus]	523	543	2	2420.25	0.00176672	0.729974	2	40	0.05	123.647	0.0335946	2.03359	FALSE	TRUE	358	230	63.954
F:\25-03-2022\20220324-TEST BROTH-POS-00.d	2518	scanId=1440469		24.0077	679.34	450.445	2	1356.66	40	2369.21	K.QTIAAHVTDVM(oxidation of M)R.D	QTIAAHVTDVMR	DECOY_WP_012293315.1 MULTISPECIES: dipicolinate synthase subunit B [Lysinibacillus]	15	26	0	1356.68	-0.01717	-12.6559	2	22	0.0909091	79.5208	0.0335643	2.03356	FALSE	TRUE	358	231	64.2321
F:\25-03-2022\20220324-TEST BROTH-POS-00.d	5612	scanId=3180159		53.0025	657.397	1143.8	2	1312.78	80	5444.76	K.IAEATREGILLK.Y	IAEATREGILLK	DECOY_WP_008180529.1 MULTISPECIES: rod shape-determining protein [Lysinibacillus]	127	138	1	1312.77	0.00899419	6.8513	2	22	0.0909091	182.718	0.0335584	2.03356	FALSE	TRUE	358	232	64.3473
F:\25-03-2022\20220324-TEST BROTH-POS-00.d	3443	scanId=1985457		33.0908	421.24	1296.7	2	840.466	48	4251.72	K.GYLIYGR.I	GYLIYGR	DECOY_WP_012293926.1 MULTISPECIES: methyl-accepting chemotaxis protein [Lysinibacillus]	489	495	0	840.449	0.0167157	19.889	2	12	0.166667	141.758	0.0333413	2.03334	FALSE	TRUE	358	233	64.3473
F:\25-03-2022\20220324-TEST BROTH-POS-00.d	5951	scanId=3375788		56.263	1521.27	680.807	2	3040.53	95	4909.42	R.EETPSM(oxidation of M)GAIIADIKNSQLAPVLGDWELK.V	EETPSMGAIIADIKNSQLAPVLGDWELK	DECOY_WP_031418189.1 MULTISPECIES: transporter substrate-binding domain-containing protein [Lysinibacillus]	160	187	1	3040.54	-0.0115452	-3.79709	2	54	0.037037	163.386	0.0332802	2.03328	FALSE	TRUE	358	234	64.3473
F:\25-03-2022\20220324-TEST BROTH-POS-00.d	4048	scanId=2329706		38.8283	989.021	1483.45	2	1976.03	78	4678.42	M.LLGSHVSMSGKEM(oxidation of M)LLGSSK.E	LLGSHVSMSGKEMLLGSSK	WP_012295216.1 MULTISPECIES: deoxyribonuclease IV [Lysinibacillus]	2	20	1	1976.01	0.0212666	10.7624	2	36	0.0555556	153.937	0.0329036	2.0329	TRUE	FALSE	359	234	64.3473
F:\25-03-2022\20220324-TEST BROTH-POS-00.d	3849	scanId=2220438		37.0072	805.443	941.817	2	1608.87	59	3334.19	K.AGKPTAEHVDSLEKK.-	AGKPTAEHVDSLEKK	WP_054549827.1 MULTISPECIES: MFS transporter [Lysinibacillus]	401	415	1	1608.85	0.0247043	15.3553	2	28	0.0714286	109.481	0.0328358	2.03284	TRUE	FALSE	360	234	64.3473
F:\25-03-2022\20220324-TEST BROTH-POS-00.d	6357	scanId=3608519		60.1418	713.432	1589.91	2	1424.85	158	13509.4	M.QRIANLIAVKDGK.V	QRIANLIAVKDGK	WP_012292231.1 MULTISPECIES: 8-oxo-dGTP diphosphatase [Lysinibacillus]	2	14	2	1424.85	0.00377264	2.64775	2	24	0.0833333	443.162	0.0328041	2.0328	TRUE	FALSE	361	234	64.3473
F:\25-03-2022\20220324-TEST BROTH-POS-00.d	4010	scanId=2309877		38.4978	835.931	1567.72	2	1669.85	64	3377.17	R.ILQAANDVIQNNTTR.Y	ILQAANDVIQNNTTR	WP_012292024.1 MULTISPECIES: DNA helicase PcrA [Lysinibacillus]	295	309	0	1669.87	-0.026362	-15.7868	2	28	0.0714286	110.532	0.0327292	2.03273	TRUE	FALSE	362	234	64.3473
F:\25-03-2022\20220324-TEST BROTH-POS-00.d	2603	scanId=1488338		24.8055	687.877	459.856	2	1373.74	65	4604.54	K.VVM(oxidation of M)LNLEALDNK.L	VVMLNLEALDNK	DECOY_WP_012295646.1 MULTISPECIES: septation ring formation regulator EzrA [Lysinibacillus]	291	302	0	1373.72	0.0173878	12.6574	2	22	0.0909091	150.6	0.0327069	2.03271	FALSE	TRUE	362	235	64.6223
F:\25-03-2022\20220324-TEST BROTH-POS-00.d	3644	scanId=2104508		35.075	571.818	1167.39	2	1141.62	61	4068.79	R.LTMHLGKSQK.G	LTMHLGKSQK	DECOY_WP_012292941.1 MULTISPECIES: YisL family protein [Lysinibacillus]	85	94	1	1141.63	-0.00715871	-6.27062	2	18	0.111111	133.018	0.0326921	2.03269	FALSE	TRUE	362	236	64.7185
F:\25-03-2022\20220324-TEST BROTH-POS-00.d	5999	scanId=3403835		56.7304	877.456	1391.48	2	1752.9	86	5373.48	R.FLC[carbamidomethylation of C]EQKPGLYTIER.L	FLCEQKPGLYTIER	WP_053592564.1 MULTISPECIES: DNA ligase D [Lysinibacillus]	502	515	0	1752.89	0.01086	6.19549	2	26	0.0769231	175.239	0.0326119	2.03261	TRUE	FALSE	363	236	64.7185
F:\25-03-2022\20220324-TEST BROTH-POS-00.d	3777	scanId=2179290		36.3214	741.886	778.848	2	1481.76	64	4413.41	K.GDILAITAPVAGNDR.I	GDILAITAPVAGNDR	DECOY_WP_012295426.1 MULTISPECIES: pseudouridine-5'-phosphate glycosidase [Lysinibacillus]	242	256	0	1481.78	-0.0273407	-18.4512	2	28	0.0714286	142.232	0.0322273	2.03223	FALSE	TRUE	363	237	64.8142
F:\25-03-2022\20220324-TEST BROTH-POS-00.d	4548	scanId=2583218		43.0535	817.415	1521.49	2	1632.82	96	6823.97	K.DELLLTDNAVDM(oxidation of M)LR.Q	DELLLTDNAVDMLR	WP_012292327.1 MULTISPECIES: glycosyl hydrolase family 18 protein [Lysinibacillus]	80	93	0	1632.8	0.0125415	7.68097	2	26	0.0769231	218.456	0.0320131	2.03201	TRUE	FALSE	364	237	64.8142
F:\25-03-2022\20220324-TEST BROTH-POS-00.d	1871	scanId=1053698		17.5615	546.803	719.266	2	1091.59	33	2509.37	-.MKSISGDKVK.N	MKSISGDKVK	DECOY_WP_012293541.1 MULTISPECIES: S-layer homology domain-containing protein [Lysinibacillus]	1	10	2	1091.6	-0.0103253	-9.4589	2	18	0.111111	79.6154	0.0317273	2.03173	FALSE	TRUE	364	238	65.0039
F:\25-03-2022\20220324-TEST BROTH-POS-00.d	4950	scanId=2792750		46.5457	718.912	2608.38	2	1435.81	101	6251.61	K.DFTTIPEIFLIK.E	DFTTIPEIFLIK	DECOY_WP_036160835.1 MULTISPECIES: DUF115 domain-containing protein [Lysinibacillus]	484	495	0	1435.8	0.0139698	9.72966	2	22	0.0909091	198.32	0.0317231	2.03172	FALSE	TRUE	364	239	65.0039
F:\25-03-2022\20220324-TEST BROTH-POS-00.d	3403	scanId=1960967		32.6827	688.343	945.035	2	1374.67	46	2850.47	K.LQENYSYFAIK.D	LQENYSYFAIK	WP_068985713.1 MULTISPECIES: protein arginine kinase [Lysinibacillus]	67	77	0	1374.68	-0.00953719	-6.93775	2	20	0.1	90.3377	0.0316922	2.03169	TRUE	FALSE	365	239	65.0039
F:\25-03-2022\20220324-TEST BROTH-POS-00.d	4085	scanId=2348547		39.1423	880.433	1194.44	2	1758.85	103	6837.03	K.FGSLMEDKGFWESVK.T	FGSLMEDKGFWESVK	WP_012295810.1 MULTISPECIES: DUF1002 domain-containing protein [Lysinibacillus]	275	289	1	1758.83	0.0218739	12.4366	2	28	0.0714286	215.799	0.0315633	2.03156	TRUE	FALSE	366	239	65.0039
F:\25-03-2022\20220324-TEST BROTH-POS-00.d	4777	scanId=2700933		45.0154	718.912	7702.92	2	1435.81	134	12805.9	R.RAGERGVTVGIHGK.H	RAGERGVTVGIHGK	DECOY_WP_012292462.1 MULTISPECIES: acetamidase/formamidase family protein [Lysinibacillus]	268	281	2	1435.8	0.00825015	5.74603	2	26	0.0769231	401.609	0.0313612	2.03136	FALSE	TRUE	366	240	65.015
F:\25-03-2022\20220324-TEST BROTH-POS-00.d	6782	scanId=3851493		64.1914	1260.67	952.644	2	2519.32	99	5895.95	K.GVNAIKAVQEM(oxidation of M)TTAKYGFLTFSK.A	GVNAIKAVQEMTTAKYGFLTFSK	DECOY_WP_012292202.1 MULTISPECIES: TetR/AcrR family transcriptional regulator [Lysinibacillus]	157	179	2	2519.31	0.00884791	3.51204	2	44	0.0454545	184.531	0.0312978	2.0313	FALSE	TRUE	366	241	65.015
F:\25-03-2022\20220324-TEST BROTH-POS-00.d	3913	scanId=2256773		37.6127	1171.63	1547.57	2	2341.25	73	4907.73	K.GIYVVLSLLAIM(oxidation of M)FVLTGC[carbamidomethylation of C]GTAK.D	GIYVVLSLLAIMFVLTGCGTAK	WP_012296168.1 MULTISPECIES: peptidylprolyl isomerase [Lysinibacillus]	7	28	0	2341.28	-0.0339014	-14.4798	2	42	0.047619	153.218	0.0312198	2.03122	TRUE	FALSE	367	241	65.015
F:\25-03-2022\20220324-TEST BROTH-POS-00.d	4846	scanId=2736309		45.605	748.91	1515.8	2	1495.81	81	5654.2	K.LSTFFRSNLQGAR.Q	LSTFFRSNLQGAR	WP_217581625.1 MULTISPECIES: sensor histidine kinase [Lysinibacillus]	417	429	1	1495.79	0.0159701	10.6767	2	24	0.0833333	176.318	0.0311836	2.03118	TRUE	FALSE	368	241	65.015
F:\25-03-2022\20220324-TEST BROTH-POS-00.d	5782	scanId=3279324		54.6553	1056.55	850.446	2	2111.09	83	5276.84	K.KIAELWETTPEELYAYR.K	KIAELWETTPEELYAYR	WP_115673784.1 MULTISPECIES: carbamoyl-phosphate synthase large subunit [Lysinibacillus]	494	510	1	2111.06	0.0332756	15.7625	2	32	0.0625	162.903	0.0308714	2.03087	TRUE	FALSE	369	241	65.015
F:\25-03-2022\20220324-TEST BROTH-POS-00.d	2495	scanId=1427287		23.788	518.263	569.06	2	1034.51	49	3531.07	R.M(oxidation of M)EALALESR.W	MEALALESR	DECOY_WP_025219718.1 MULTISPECIES: DUF6148 family protein [Lysinibacillus]	20	28	0	1034.51	0.00524827	5.07321	2	16	0.125	108.642	0.0307675	2.03077	FALSE	TRUE	369	242	65.2848
F:\25-03-2022\20220324-TEST BROTH-POS-00.d	5811	scanId=3295352		54.9224	858.461	1191.38	2	1714.91	91	4863.02	R.NIKALEDGGKAPIDM(oxidation of M)K.E	NIKALEDGGKAPIDMK	DECOY_WP_036160615.1 MULTISPECIES: HAMP domain-containing histidine kinase [Lysinibacillus]	238	253	2	1714.89	0.016017	9.33992	2	30	0.0666667	149.417	0.0307251	2.03073	FALSE	TRUE	369	243	65.3774
F:\25-03-2022\20220324-TEST BROTH-POS-00.d	5098	scanId=2876354		47.9391	826.497	2038.15	2	1650.98	104	7789.35	R.LKTKQIFELYIQK.G	LKTKQIFELYIQK	WP_012292167.1 MULTISPECIES: glycerate kinase [Lysinibacillus]	364	376	2	1650.97	0.00851042	5.1548	2	24	0.0833333	237.434	0.0304818	2.03048	TRUE	FALSE	370	243	65.3774
F:\25-03-2022\20220324-TEST BROTH-POS-00.d	4155	scanId=2385654		39.7608	543.31	2227.02	2	1084.61	99	8003.61	R.AGAAEALLVDR.A	AGAAEALLVDR	DECOY_WP_012293185.1 MULTISPECIES: dihydroorotase [Lysinibacillus]	202	212	0	1084.59	0.0176966	16.3164	2	20	0.1	242.855	0.0303432	2.03034	FALSE	TRUE	370	244	65.5738
F:\25-03-2022\20220324-TEST BROTH-POS-00.d	1718	scanId=963706		16.0616	344.717	1099.34	2	687.42	41	4853.41	K.VTDIIK.L	VTDIIK	DECOY_WP_036161240.1 MULTISPECIES: AraC family transcriptional regulator [Lysinibacillus]	8	13	0	687.417	0.00370107	5.38403	2	10	0.2	146.268	0.0301371	2.03014	FALSE	TRUE	370	245	65.5738
F:\25-03-2022\20220324-TEST BROTH-POS-00.d	2511	scanId=1436370		23.9394	553.782	817.509	2	1105.55	51	4201.87	R.NVEKTTEGTK.F	NVEKTTEGTK	WP_012295696.1 MULTISPECIES: UDP-N-acetylmuramate--L-alanine ligase [Lysinibacillus]	233	242	1	1105.56	-0.0117964	-10.67	2	18	0.111111	126.618	0.0301337	2.03013	TRUE	FALSE	371	245	65.5738
F:\25-03-2022\20220324-TEST BROTH-POS-00.d	5518	scanId=3126937		52.1155	749.921	1008.72	2	1497.83	77	4943.92	K.GSVVAIARGLDGQQK.M	GSVVAIARGLDGQQK	DECOY_WP_012293281.1 MULTISPECIES: MinD/ParA family protein [Lysinibacillus]	265	279	1	1497.83	0.00128077	0.855084	2	28	0.0714286	148.537	0.0300444	2.03004	FALSE	TRUE	371	246	65.5738
F:\25-03-2022\20220324-TEST BROTH-POS-00.d	5375	scanId=3040103		50.6683	743.881	883.462	2	1485.75	65	4135.01	R.GNVFLSMYNKSAR.T	GNVFLSMYNKSAR	DECOY_WP_012293357.1 MULTISPECIES: DNA mismatch repair endonuclease MutL [Lysinibacillus]	368	380	1	1485.74	0.00683542	4.60068	2	24	0.0833333	124.049	0.0299997	2.03	FALSE	TRUE	371	247	65.5738
F:\25-03-2022\20220324-TEST BROTH-POS-00.d	2943	scanId=1689552		28.1591	577.272	1240.7	2	1152.53	71	4905.45	K.ELVNEYSGDK.T	ELVNEYSGDK	WP_012294131.1 MULTISPECIES: CueP family metal-binding protein [Lysinibacillus]	48	57	0	1152.53	-0.00124854	-1.08331	2	18	0.111111	146.231	0.0298098	2.02981	TRUE	FALSE	372	247	65.5738
F:\25-03-2022\20220324-TEST BROTH-POS-00.d	5833	scanId=3308268		55.1377	1096.57	1567.76	2	2191.12	101	6098.52	K.GGDTLFSIARKNDITVDELK.A	GGDTLFSIARKNDITVDELK	WP_031418351.1 MULTISPECIES: LysM peptidoglycan-binding and 3D domain-containing protein [Lysinibacillus]	83	102	2	2191.15	-0.0283152	-12.9225	2	38	0.0526316	181.792	0.0298093	2.02981	TRUE	FALSE	373	247	65.5738
F:\25-03-2022\20220324-TEST BROTH-POS-00.d	5781	scanId=3278992		54.6497	473.805	2926.13	2	945.595	143	13926.3	R.RVFAIKGR.G	RVFAIKGR	WP_196764890.1 MULTISPECIES: phage terminase large subunit family protein [Lysinibacillus]	450	457	2	945.587	0.00813995	8.60836	2	14	0.142857	414.578	0.0297695	2.02977	TRUE	FALSE	374	247	65.5738
F:\25-03-2022\20220324-TEST BROTH-POS-00.d	5485	scanId=3107152		51.7857	1439.78	701	2	2877.55	105	5705.47	K.YNIGSYSVKILVEGNPLDNLTLDNVK.V	YNIGSYSVKILVEGNPLDNLTLDNVK	DECOY_WP_036161093.1 MULTISPECIES: acryloyl-CoA reductase [Lysinibacillus]	287	312	1	2877.51	0.0354893	12.3333	2	50	0.04	169.297	0.0296728	2.02967	FALSE	TRUE	374	248	65.5738
F:\25-03-2022\20220324-TEST BROTH-POS-00.d	3704	scanId=2138574		35.6428	572.814	1014.23	2	1143.61	59	4530.3	K.IVAEMVQNIK.L	IVAEMVQNIK	WP_031416319.1 MULTISPECIES: tRNA (adenosine(37)-N6)-threonylcarbamoyltransferase complex dimerization subunit type 1 TsaB [Lysinibacillus]	23	32	0	1143.63	-0.0192565	-16.838	2	18	0.111111	134.164	0.0296147	2.02961	TRUE	FALSE	375	248	65.5738
F:\25-03-2022\20220324-TEST BROTH-POS-00.d	2694	scanId=1543135		25.7188	444.757	1389.19	2	887.499	64	6029.14	K.TVREIDR.E	TVREIDR	DECOY_WP_036221292.1 MULTISPECIES: O-methyltransferase [Lysinibacillus]	124	130	1	887.482	0.0167036	18.8213	2	12	0.166667	177.554	0.0294493	2.02945	FALSE	TRUE	375	249	65.5738
F:\25-03-2022\20220324-TEST BROTH-POS-00.d	1270	scanId=698896		11.6481	360.679	1287.25	2	719.344	54	5414.42	K.TGTANEK.A	TGTANEK	WP_012295199.1 MULTISPECIES: O-linked GlcNAc transferase [Lysinibacillus]	96	102	0	719.345	-0.00128327	-1.78394	2	12	0.166667	159.434	0.0294462	2.02945	TRUE	FALSE	376	249	65.5738
F:\25-03-2022\20220324-TEST BROTH-POS-00.d	3961	scanId=2282294		38.0381	465.778	1353.27	2	929.542	59	4767.11	K.ELKYHLK.Q	ELKYHLK	WP_051563248.1 MULTISPECIES: DUF3885 domain-containing protein [Lysinibacillus]	103	109	1	929.533	0.00813598	8.75275	2	12	0.166667	140.357	0.0294429	2.02944	TRUE	FALSE	377	249	65.5738
F:\25-03-2022\20220324-TEST BROTH-POS-00.d	5343	scanId=3021034		50.3504	766.405	1464.43	2	1530.79	103	7594.95	-.MIKIHYFNHNSK.T	MIKIHYFNHNSK	WP_012295396.1 MULTISPECIES: magnesium/cobalt transporter CorA [Lysinibacillus]	1	12	1	1530.78	0.0181686	11.8689	2	22	0.0909091	222.206	0.0292571	2.02926	TRUE	FALSE	378	249	65.5738
F:\25-03-2022\20220324-TEST BROTH-POS-00.d	3654	scanId=2109992		35.1664	563.821	1220.35	2	1125.63	64	4260.45	K.VTHVSVDLTR.A	VTHVSVDLTR	DECOY_WP_206701063.1 MULTISPECIES: PLP-dependent aminotransferase family protein [Lysinibacillus]	402	411	0	1125.61	0.0138743	12.326	2	18	0.111111	123.604	0.0290119	2.02901	FALSE	TRUE	378	250	65.8372
F:\25-03-2022\20220324-TEST BROTH-POS-00.d	5382	scanId=3044370		50.7394	733.938	2349.85	2	1465.86	83	6134.34	K.AVPIVGSARNLIEK.I	AVPIVGSARNLIEK	DECOY_WP_012293535.1 MULTISPECIES: class 1b ribonucleoside-diphosphate reductase subunit alpha [Lysinibacillus]	476	489	1	1465.86	0.000125099	0.0853416	2	26	0.0769231	177.677	0.0289644	2.02896	FALSE	TRUE	378	251	66.1005
F:\25-03-2022\20220324-TEST BROTH-POS-00.d	3624	scanId=2093042		34.8839	702.36	1021.27	2	1402.7	69	4249.69	M.LEFRMTHNIDK.F	LEFRMTHNIDK	DECOY_WP_036161441.1 MULTISPECIES: GNAT family N-acetyltransferase [Lysinibacillus]	2	12	1	1402.7	0.00193241	1.37763	2	20	0.1	123.005	0.0289445	2.02894	FALSE	TRUE	378	252	66.3639
F:\25-03-2022\20220324-TEST BROTH-POS-00.d	4703	scanId=2661848		44.364	1049.03	1909.11	2	2096.04	66	4121.24	R.AAATAEKDQGAFVTVLHDPR.K	AAATAEKDQGAFVTVLHDPR	DECOY_WP_031417430.1 MULTISPECIES: BrxA/BrxB family bacilliredoxin [Lysinibacillus]	57	76	1	2096.07	-0.0231347	-11.0372	2	38	0.0526316	119.282	0.0289432	2.02894	FALSE	TRUE	378	253	66.6272
F:\25-03-2022\20220324-TEST BROTH-POS-00.d	4471	scanId=2544441		42.4072	597.856	1582.37	2	1193.7	96	7619.69	K.ALQGVEIVLPR.G	ALQGVEIVLPR	DECOY_WP_012293310.1 MULTISPECIES: polyribonucleotide nucleotidyltransferase [Lysinibacillus]	682	692	0	1193.71	-0.0157466	-13.1913	2	20	0.1	219.56	0.0288149	2.02881	FALSE	TRUE	378	254	66.7141
F:\25-03-2022\20220324-TEST BROTH-POS-00.d	3222	scanId=1855197		30.9198	655.849	623.034	2	1309.68	49	3937.46	R.EKIERDPAQPK.F	EKIERDPAQPK	WP_012293963.1 MULTISPECIES: response regulator transcription factor [Lysinibacillus]	204	214	2	1309.7	-0.0157126	-11.9971	2	20	0.1	113.18	0.0287444	2.02874	TRUE	FALSE	379	254	66.7141
F:\25-03-2022\20220324-TEST BROTH-POS-00.d	4728	scanId=2674330		44.572	788.422	1716.51	2	1574.83	107	7936.91	K.ALRDAEKFAADAVAK.V	ALRDAEKFAADAVAK	DECOY_WP_012293769.1 MULTISPECIES: aldehyde dehydrogenase family protein [Lysinibacillus]	443	457	2	1574.84	-0.0132005	-8.38213	2	28	0.0714286	226.476	0.0285345	2.02853	FALSE	TRUE	379	255	66.9767
F:\25-03-2022\20220324-TEST BROTH-POS-00.d	4058	scanId=2334368		38.906	487.791	2375.29	2	973.568	76	6542.24	R.SRIQETLK.V	SRIQETLK	DECOY_WP_012295901.1 MULTISPECIES: HAD-IA family hydrolase [Lysinibacillus]	130	137	1	973.556	0.0125505	12.8914	2	14	0.142857	186.36	0.0284856	2.02849	FALSE	TRUE	379	256	67.2394
F:\25-03-2022\20220324-TEST BROTH-POS-00.d	3085	scanId=1773983		29.5663	424.741	999.876	2	847.468	59	4504.35	R.AIGQGQFK.K	AIGQGQFK	DECOY_WP_231786325.1 MULTISPECIES: GNAT family N-acetyltransferase [Lysinibacillus]	57	64	0	847.455	0.0132149	15.5936	2	14	0.142857	128.053	0.0284286	2.02843	FALSE	TRUE	379	257	67.502
F:\25-03-2022\20220324-TEST BROTH-POS-00.d	3103	scanId=1783347		29.7223	490.287	697.226	2	978.56	37	3150.72	K.GLYREITK.A	GLYREITK	DECOY_WP_068983165.1 MULTISPECIES: type I DNA topoisomerase [Lysinibacillus]	672	679	1	978.55	0.00969541	9.90793	2	14	0.142857	89.3269	0.0283512	2.02835	FALSE	TRUE	379	258	67.7647
F:\25-03-2022\20220324-TEST BROTH-POS-00.d	4954	scanId=2794799		46.5799	813.946	1402.76	2	1625.88	79	4881.32	K.GNEARRLIEVEQGR.T	GNEARRLIEVEQGR	DECOY_WP_012291998.1 MULTISPECIES: MoxR family ATPase [Lysinibacillus]	129	142	2	1625.86	0.0167751	10.3177	2	26	0.0769231	137.505	0.0281697	2.02817	FALSE	TRUE	379	259	67.9315
F:\25-03-2022\20220324-TEST BROTH-POS-00.d	4521	scanId=2569279		42.8212	828.452	1683.22	2	1654.89	68	4713.51	R.AAHVMKLGEPSGAIFK.E	AAHVMKLGEPSGAIFK	DECOY_WP_031416179.1 MULTISPECIES: DUF2294 domain-containing protein [Lysinibacillus]	53	68	1	1654.89	0.0035658	2.15471	2	30	0.0666667	132.42	0.0280937	2.02809	FALSE	TRUE	379	260	67.9315
F:\25-03-2022\20220324-TEST BROTH-POS-00.d	6290	scanId=3568986		59.483	899.999	1158.19	2	1797.98	147	10284.1	K.GAIPGEEITAQVTKTQR.N	GAIPGEEITAQVTKTQR	WP_036162515.1 MULTISPECIES: 23S rRNA (uracil(1939)-C(5))-methyltransferase RlmD [Lysinibacillus]	39	55	1	1797.96	0.0242836	13.5062	2	32	0.0625	286.737	0.0278817	2.02788	TRUE	FALSE	380	260	67.9315
F:\25-03-2022\20220324-TEST BROTH-POS-00.d	4506	scanId=2562338		42.7055	467.301	12413.5	2	932.588	120	11463.3	R.QLIALFTK.-	QLIALFTK	WP_012295215.1 MULTISPECIES: Nif11 family protein [Lysinibacillus]	71	78	0	932.57	0.0183441	19.6705	2	14	0.142857	319.531	0.0278742	2.02787	TRUE	FALSE	381	260	67.9315
F:\25-03-2022\20220324-TEST BROTH-POS-00.d	5789	scanId=3283205		54.7199	1363.15	560.018	2	2724.29	77	3727.93	R.IEEVVPNIHQIAMEM(oxidation of M)NEHAIYTK.I	IEEVVPNIHQIAMEMNEHAIYTK	DECOY_WP_012295227.1 MULTISPECIES: sensor histidine kinase [Lysinibacillus]	452	474	0	2724.33	-0.0363716	-13.3507	2	44	0.0454545	102.787	0.0275721	2.02757	FALSE	TRUE	381	261	68.1928
F:\25-03-2022\20220324-TEST BROTH-POS-00.d	4016	scanId=2313311		38.5551	1040.55	1397.39	2	2079.08	79	4490.52	R.RGAEFIISKAFEDIQQLD.-	RGAEFIISKAFEDIQQLD	DECOY_WP_012293111.1 MULTISPECIES: inositol monophosphatase family protein [Lysinibacillus]	247	264	2	2079.06	0.0180708	8.69179	2	34	0.0588235	123.787	0.0275662	2.02757	FALSE	TRUE	381	262	68.2749
F:\25-03-2022\20220324-TEST BROTH-POS-00.d	1939	scanId=1093936		18.2321	509.771	464.8	2	1017.53	33	2513.93	K.VGAATETELK.E	VGAATETELK	WP_126659346.1 MULTISPECIES: chaperonin GroEL [Lysinibacillus]	379	388	0	1017.53	-0.00658746	-6.47395	2	18	0.111111	69.1964	0.0275252	2.02753	TRUE	FALSE	382	262	68.2749
F:\25-03-2022\20220324-TEST BROTH-POS-00.d	3588	scanId=2073766		34.5626	586.835	966.052	2	1171.66	55	3723.92	M.LEKERELQK.A	LEKERELQK	DECOY_WP_036160352.1 MULTISPECIES: nucleoside triphosphate pyrophosphohydrolase [Lysinibacillus]	2	10	2	1171.66	-0.000301707	-0.257505	2	16	0.125	101.567	0.0272741	2.02727	FALSE	TRUE	382	263	68.5355
F:\25-03-2022\20220324-TEST BROTH-POS-00.d	1766	scanId=992798		16.5465	372.22	902.124	2	742.426	47	3463.16	K.LVDQLR.M	LVDQLR	DECOY_WP_174804715.1 MULTISPECIES: isoleucine--tRNA ligase [Lysinibacillus]	237	242	0	742.434	-0.00769186	-10.3603	2	10	0.2	94.1384	0.0271828	2.02718	FALSE	TRUE	382	264	68.796
F:\25-03-2022\20220324-TEST BROTH-POS-00.d	4939	scanId=2787723		46.4619	741.428	3231.06	2	1480.84	129	11550.5	K.QNTPFNKLPGPLR.V	QNTPFNKLPGPLR	DECOY_WP_012294072.1 MULTISPECIES: beta-N-acetylhexosaminidase [Lysinibacillus]	266	278	1	1480.82	0.025832	17.4445	2	24	0.0833333	311.211	0.0269436	2.02694	FALSE	TRUE	382	265	68.9947
F:\25-03-2022\20220324-TEST BROTH-POS-00.d	4168	scanId=2392002		39.8666	496.302	1808.98	2	990.589	80	6001.72	-.MLLLKVM(oxidation of M)K.E	MLLLKVMK	DECOY_WP_036161940.1 MULTISPECIES: TetR/AcrR family transcriptional regulator [Lysinibacillus]	1	8	1	990.597	-0.00788653	-7.96139	2	14	0.142857	161.04	0.0268323	2.02683	FALSE	TRUE	382	266	68.9947
F:\25-03-2022\20220324-TEST BROTH-POS-00.d	3172	scanId=1825110		30.4184	620.351	601.738	2	1238.69	47	3188.73	K.IGFTLVSGFGNK.L	IGFTLVSGFGNK	DECOY_WP_012292606.1 MULTISPECIES: O-acetylhomoserine aminocarboxypropyltransferase/cysteine synthase [Lysinibacillus]	91	102	0	1238.67	0.0223089	18.0104	2	22	0.0909091	85.125	0.0266956	2.0267	FALSE	TRUE	382	267	68.9947
F:\25-03-2022\20220324-TEST BROTH-POS-00.d	6520	scanId=3701745		61.6956	978.94	1348.18	2	1955.87	124	7961.77	K.VEHYESFSDFDELIAR.A	VEHYESFSDFDELIAR	WP_012295643.1 MULTISPECIES: tRNA 4-thiouridine(8) synthase ThiI [Lysinibacillus]	363	378	0	1955.89	-0.0250596	-12.8124	2	30	0.0666667	211.786	0.0266003	2.0266	TRUE	FALSE	383	267	68.9947
F:\25-03-2022\20220324-TEST BROTH-POS-00.d	2204	scanId=1252266		20.871	551.288	585.222	2	1100.56	40	3275.87	K.VIPMPC[carbamidomethylation of C]SLGK.A	VIPMPCSLGK	DECOY_WP_048394135.1 MULTISPECIES: sulfurtransferase TusA family protein [Lysinibacillus]	165	174	0	1100.57	-0.0101802	-9.24991	2	18	0.111111	87.0451	0.0265716	2.02657	FALSE	TRUE	383	268	68.9947
F:\25-03-2022\20220324-TEST BROTH-POS-00.d	3533	scanId=2040140		34.0022	895.966	640.123	2	1789.92	49	3286.58	R.SIM(oxidation of M)LNRYGELFLYR.V	SIMLNRYGELFLYR	WP_031419566.1 MULTISPECIES: LysR family transcriptional regulator [Lysinibacillus]	54	67	1	1789.92	-0.00165246	-0.923206	2	26	0.0769231	86.979	0.0264649	2.02646	TRUE	FALSE	384	268	68.9947
F:\25-03-2022\20220324-TEST BROTH-POS-00.d	1503	scanId=834302		13.9049	552.287	1104.57	2	1102.56	45	3188.9	K.QAC[carbamidomethylation of C]LDNAALK.K	QACLDNAALK	WP_031418618.1 MULTISPECIES: alanine dehydrogenase [Lysinibacillus]	331	340	0	1102.54	0.0155756	14.127	2	18	0.111111	83.9939	0.0263395	2.02634	TRUE	FALSE	385	268	68.9947
F:\25-03-2022\20220324-TEST BROTH-POS-00.d	5032	scanId=2837717		47.2951	676.904	1402.92	2	1351.79	85	4889.75	K.VAFFIVAFAIVR.Y	VAFFIVAFAIVR	DECOY_WP_012295574.1 MULTISPECIES: CvpA family protein [Lysinibacillus]	90	101	0	1351.8	-0.00859655	-6.35933	2	22	0.0909091	128.684	0.0263171	2.02632	FALSE	TRUE	385	269	68.9947
F:\25-03-2022\20220324-TEST BROTH-POS-00.d	3175	scanId=1826994		30.4498	531.285	1292.12	2	1060.56	47	4515.63	K.GFAVVANEVR.K	GFAVVANEVR	WP_036222500.1 MULTISPECIES: methyl-accepting chemotaxis protein [Lysinibacillus]	406	415	0	1060.57	-0.0102789	-9.69186	2	18	0.111111	118.567	0.0262569	2.02626	TRUE	FALSE	386	269	68.9947
F:\25-03-2022\20220324-TEST BROTH-POS-00.d	2764	scanId=1584075		26.4011	752.378	347.757	2	1502.74	28	1913.07	R.GENTEPIQM(oxidation of M)TIVR.D	GENTEPIQMTIVR	WP_031418171.1 MULTISPECIES: S41 family peptidase [Lysinibacillus]	202	214	0	1502.74	0.00219324	1.4595	2	24	0.0833333	50.025	0.026149	2.02615	TRUE	FALSE	387	269	68.9947
F:\25-03-2022\20220324-TEST BROTH-POS-00.d	4875	scanId=2751084		45.8513	679.401	1503.18	2	1356.79	87	5893.97	-.MRKAIEQQLLK.N	MRKAIEQQLLK	DECOY_WP_012292029.1 MULTISPECIES: Asp-tRNA(Asn)/Glu-tRNA(Gln) amidotransferase subunit GatB [Lysinibacillus]	1	11	2	1356.79	-0.00432924	-3.19079	2	20	0.1	152.557	0.0258836	2.02588	FALSE	TRUE	387	270	68.9947
F:\25-03-2022\20220324-TEST BROTH-POS-00.d	4576	scanId=2596724		43.2786	608.847	2838.94	2	1215.68	100	9342.09	K.TGIISQSLGRGK.H	TGIISQSLGRGK	WP_012293213.1 MULTISPECIES: ribosome small subunit-dependent GTPase A [Lysinibacillus]	188	199	1	1215.69	-0.0148306	-12.1993	2	22	0.0909091	241.474	0.025848	2.02585	TRUE	FALSE	388	270	68.9947
F:\25-03-2022\20220324-TEST BROTH-POS-00.d	4862	scanId=2745321		45.7552	704.884	1301.24	2	1407.75	101	6861.82	R.YGGKVGSVSSVIGAK.S	YGGKVGSVSSVIGAK	DECOY_WP_036161906.1 MULTISPECIES: Rrf2 family transcriptional regulator [Lysinibacillus]	103	117	1	1407.77	-0.0177464	-12.606	2	28	0.0714286	176.768	0.0257611	2.02576	FALSE	TRUE	388	271	68.9947
F:\25-03-2022\20220324-TEST BROTH-POS-00.d	4647	scanId=2632818		43.8802	696.899	2619.23	2	1391.78	87	6464.22	R.TVGKSIDEIFRK.V	TVGKSIDEIFRK	WP_012293081.1 MULTISPECIES: ribonuclease J1 [Lysinibacillus]	210	221	2	1391.78	0.00688898	4.94978	2	22	0.0909091	166.064	0.0256898	2.02569	TRUE	FALSE	389	271	68.9947
F:\25-03-2022\20220324-TEST BROTH-POS-00.d	1615	scanId=900977		15.0161	352.703	693.581	2	703.391	39	3253.76	M.STVLER.V	STVLER	WP_008181678.1 MULTISPECIES: acyl carrier protein [Lysinibacillus]	2	7	0	703.386	0.0042963	6.10802	2	10	0.2	82.6993	0.0254165	2.02542	TRUE	FALSE	390	271	68.9947
F:\25-03-2022\20220324-TEST BROTH-POS-00.d	5144	scanId=2905047		48.4173	720.899	1294.26	2	1439.78	86	5787.43	K.KIGDTLTM(oxidation of M)KVYR.E	KIGDTLTMKVYR	WP_229389906.1 MULTISPECIES: trypsin-like peptidase domain-containing protein [Lysinibacillus]	370	381	2	1439.78	0.0022328	1.55079	2	22	0.0909091	147.021	0.0254035	2.0254	TRUE	FALSE	391	271	68.9947
F:\25-03-2022\20220324-TEST BROTH-POS-00.d	5897	scanId=3343973		55.7328	1014.58	847.681	2	2027.14	80	5284.89	R.AQRKSSSIGAEVLLDVINK.D	AQRKSSSIGAEVLLDVINK	DECOY_WP_107922387.1 MULTISPECIES: tyrosine--tRNA ligase [Lysinibacillus]	51	69	2	2027.14	0.00636487	3.13983	2	36	0.0555556	133.879	0.0253324	2.02533	FALSE	TRUE	391	272	69.0726
F:\25-03-2022\20220324-TEST BROTH-POS-00.d	1358	scanId=749064		12.4843	460.22	964.905	2	918.425	45	3402.19	K.EASENELK.G	EASENELK	WP_031417788.1 MULTISPECIES: type I glyceraldehyde-3-phosphate dehydrogenase [Lysinibacillus]	263	270	0	918.429	-0.0044298	-4.82323	2	14	0.142857	85.9112	0.0252518	2.02525	TRUE	FALSE	392	272	69.0726
F:\25-03-2022\20220324-TEST BROTH-POS-00.d	4216	scanId=2415885		40.2646	572.812	2082.58	2	1143.61	93	7529.66	R.TANEIDGIRR.S	TANEIDGIRR	DECOY_WP_012292350.1 MULTISPECIES: DUF2225 domain-containing protein [Lysinibacillus]	41	50	1	1143.6	0.0105087	9.18913	2	18	0.111111	187.881	0.0249522	2.02495	FALSE	TRUE	392	273	69.1501
F:\25-03-2022\20220324-TEST BROTH-POS-00.d	5317	scanId=3005466		50.091	1261.69	658.191	2	2521.37	81	4399.18	K.KHPSPNSGYLEAATAVQLGVQLGGK.N	KHPSPNSGYLEAATAVQLGVQLGGK	WP_036161395.1 MULTISPECIES: adenosylcobinamide-phosphate synthase CbiB [Lysinibacillus]	240	264	1	2521.33	0.0444395	17.6254	2	48	0.0416667	109.57	0.0249068	2.02491	TRUE	FALSE	393	273	69.1501
F:\25-03-2022\20220324-TEST BROTH-POS-00.d	5846	scanId=3315366		55.256	973.602	745.796	2	1945.19	91	5650.91	R.IGAMIVPLALPLEVKLLR.K	IGAMIVPLALPLEVKLLR	DECOY_WP_036161309.1 MULTISPECIES: ABC transporter permease/substrate-binding protein [Lysinibacillus]	365	382	1	1945.22	-0.0261489	-13.4427	2	34	0.0588235	140.415	0.0248482	2.02485	FALSE	TRUE	393	274	69.2273
F:\25-03-2022\20220324-TEST BROTH-POS-00.d	1679	scanId=940538		15.6755	336.215	1223.86	2	670.415	40	3378.19	K.AQAILR.R	AQAILR	WP_036162950.1 MULTISPECIES: response regulator transcription factor [Lysinibacillus]	111	116	0	670.413	0.00223233	3.32979	2	10	0.2	83.275	0.0246508	2.02465	TRUE	FALSE	394	274	69.2273
F:\25-03-2022\20220324-TEST BROTH-POS-00.d	5362	scanId=3032452		50.5407	1500.28	905.948	2	2998.54	75	3624.69	R.GTNLQANFKTSLARSSNLGLYWDAESR.A	GTNLQANFKTSLARSSNLGLYWDAESR	DECOY_WP_036162559.1 MULTISPECIES: DNA topoisomerase III [Lysinibacillus]	542	568	2	2998.49	0.0458041	15.2757	2	52	0.0384615	89.0223	0.02456	2.02456	FALSE	TRUE	394	275	69.4799
F:\25-03-2022\20220324-TEST BROTH-POS-00.d	1363	scanId=751779		12.5295	258.663	1533.37	2	515.311	43	5120.99	K.EIVR.N	EIVR	DECOY_WP_051563357.1 MULTISPECIES: PP2C family protein-serine/threonine phosphatase [Lysinibacillus]	141	144	0	515.307	0.00459776	8.92237	2	6	0.333333	124.9	0.0243899	2.02439	FALSE	TRUE	394	276	69.6318
F:\25-03-2022\20220324-TEST BROTH-POS-00.d	3736	scanId=2156909		35.9483	535.828	895.311	2	1069.64	54	4183.89	K.RTVTGGKVRP.-	RTVTGGKVRP	DECOY_WP_010860160.1 MULTISPECIES: 50S ribosomal protein L20 [Lysinibacillus]	110	119	2	1069.64	0.00614103	5.74124	2	18	0.111111	100.156	0.0239386	2.02394	FALSE	TRUE	394	277	69.6318
F:\25-03-2022\20220324-TEST BROTH-POS-00.d	4911	scanId=2771602		46.1932	719.417	2664.71	2	1436.82	115	11089.5	R.FALSLFVLDVTGR.A	FALSLFVLDVTGR	WP_012293736.1 MULTISPECIES: MFS transporter [Lysinibacillus]	33	45	0	1436.8	0.0157047	10.9303	2	24	0.0833333	265.357	0.0239287	2.02393	TRUE	FALSE	395	277	69.6318
F:\25-03-2022\20220324-TEST BROTH-POS-00.d	2962	scanId=1699080		28.3179	624.844	1089.4	2	1247.67	50	4222.74	K.SLKEELFNLR.F	SLKEELFNLR	WP_010860598.1 MULTISPECIES: 50S ribosomal protein L29 [Lysinibacillus]	20	29	1	1247.69	-0.0135549	-10.864	2	18	0.111111	100.958	0.0239083	2.02391	TRUE	FALSE	396	277	69.6318
F:\25-03-2022\20220324-TEST BROTH-POS-00.d	5094	scanId=2874306		47.905	702.876	1733.83	2	1403.74	75	5764.17	R.IKERIAADDAFR.E	IKERIAADDAFR	DECOY_WP_180276576.1 MULTISPECIES: RNA-binding transcriptional accessory protein [Lysinibacillus]	546	557	2	1403.75	-0.0146339	-10.4248	2	22	0.0909091	137.608	0.023873	2.02387	FALSE	TRUE	396	278	69.7071
F:\25-03-2022\20220324-TEST BROTH-POS-00.d	4863	scanId=2745654		45.7608	685.913	1359.51	2	1369.81	84	6150.21	-.MEAVLTLKPQIK.E	MEAVLTLKPQIK	WP_036160366.1 MULTISPECIES: aldehyde dehydrogenase family protein [Lysinibacillus]	1	12	0	1369.8	0.0120536	8.79954	2	22	0.0909091	146.453	0.0238127	2.02381	TRUE	FALSE	397	278	69.7071
F:\25-03-2022\20220324-TEST BROTH-POS-00.d	5027	scanId=2834449		47.2407	601.859	3129.26	2	1201.7	96	8496.42	R.NTPFLLKNKK.N	NTPFLLKNKK	DECOY_WP_012293879.1 MULTISPECIES: MarR family transcriptional regulator [Lysinibacillus]	60	69	2	1201.72	-0.0157275	-13.0875	2	18	0.111111	201.299	0.0236922	2.02369	FALSE	TRUE	397	279	69.9579
F:\25-03-2022\20220324-TEST BROTH-POS-00.d	1495	scanId=829534		13.8254	431.241	883.883	2	860.468	38	3438.49	R.STELVNAK.D	STELVNAK	DECOY_WP_036162816.1 MULTISPECIES: 3-isopropylmalate dehydrogenase [Lysinibacillus]	174	181	0	860.46	0.00728411	8.46536	2	14	0.142857	81.0448	0.0235699	2.02357	FALSE	TRUE	397	280	70.0686
F:\25-03-2022\20220324-TEST BROTH-POS-00.d	4975	scanId=2806143		46.7689	748.914	1635.94	2	1495.81	75	5501.26	K.KNSTSPLFTFKVK.I	KNSTSPLFTFKVK	DECOY_WP_012292707.1 MULTISPECIES: LPXTG cell wall anchor domain-containing protein [Lysinibacillus]	1456	1468	2	1495.84	-0.0273588	-18.2899	2	24	0.0833333	128.829	0.0234181	2.02342	FALSE	TRUE	397	281	70.0686
F:\25-03-2022\20220324-TEST BROTH-POS-00.d	2531	scanId=1447785		24.1296	584.823	662.109	2	1167.63	31	1666.75	R.GKISFM(oxidation of M)IQTK.L	GKISFMIQTK	DECOY_WP_217581670.1 MULTISPECIES: PucR family transcriptional regulator ligand-binding domain-containing protein [Lysinibacillus]	346	355	1	1167.63	-0.000294099	-0.251877	2	18	0.111111	38.8944	0.0233355	2.02334	FALSE	TRUE	397	282	70.0686
F:\25-03-2022\20220324-TEST BROTH-POS-00.d	2375	scanId=1355873		22.5978	311.184	848.744	2	620.353	58	6534.63	K.VLDFK.A	VLDFK	DECOY_WP_012295585.1 MULTISPECIES: LysM peptidoglycan-binding domain-containing protein [Lysinibacillus]	35	39	0	620.353	-2.38469e-05	-0.0384408	2	8	0.25	151.261	0.0231476	2.02315	FALSE	TRUE	397	283	70.0686
F:\25-03-2022\20220324-TEST BROTH-POS-00.d	5259	scanId=2973322		49.5552	749.888	1375.56	2	1497.76	71	4552.33	K.QVDEPIAGRSDALK.V	QVDEPIAGRSDALK	DECOY_WP_012293320.1 MULTISPECIES: BMP family protein [Lysinibacillus]	25	38	1	1497.78	-0.0174862	-11.6747	2	26	0.0769231	104.333	0.0229186	2.02292	FALSE	TRUE	397	284	70.0686
F:\25-03-2022\20220324-TEST BROTH-POS-00.d	3656	scanId=2110657		35.1775	1180.61	648.291	2	2359.2	62	3115.49	R.LAGEAIATSGTTNVVIDPVMIC[carbamidomethylation of C]K.G	LAGEAIATSGTTNVVIDPVMICK	WP_012292694.1 MULTISPECIES: bifunctional hydroxymethylpyrimidine kinase/phosphomethylpyrimidine kinase [Lysinibacillus]	89	111	0	2359.21	-0.0135429	-5.74042	2	44	0.0454545	71.1591	0.0228404	2.02284	TRUE	FALSE	398	284	70.0686
F:\25-03-2022\20220324-TEST BROTH-POS-00.d	2752	scanId=1577258		26.2875	499.801	957.472	2	997.587	61	4330.41	K.KSHISIWK.-	KSHISIWK	DECOY_WP_012293155.1 MULTISPECIES: stage V sporulation protein D [Lysinibacillus]	631	638	1	997.571	0.016182	16.2214	2	14	0.142857	98.824	0.022821	2.02282	FALSE	TRUE	398	285	70.0686
F:\25-03-2022\20220324-TEST BROTH-POS-00.d	4504	scanId=2560996		42.6831	600.337	1442.44	2	1198.66	66	3600.49	K.QAAQPTTINKK.K	QAAQPTTINKK	DECOY_WP_036161224.1 MULTISPECIES: DnaD domain-containing protein [Lysinibacillus]	42	52	1	1198.67	-0.00740537	-6.17801	2	20	0.1	81.6054	0.0226651	2.02267	FALSE	TRUE	398	286	70.0686
F:\25-03-2022\20220324-TEST BROTH-POS-00.d	3792	scanId=2187872		36.4644	747.902	1818.28	2	1493.79	89	5869.18	R.TDVSEDLRLKYR.Y	TDVSEDLRLKYR	WP_012295418.1 MULTISPECIES: aspartate--tRNA ligase [Lysinibacillus]	118	129	2	1493.78	0.00598854	4.00897	2	22	0.0909091	132.494	0.0225745	2.02257	TRUE	FALSE	399	286	70.0686
F:\25-03-2022\20220324-TEST BROTH-POS-00.d	4881	scanId=2754518		45.9085	932.475	3420.06	2	1862.94	106	8792.65	R.IWRLFVNEEDGAISSK.I	IWRLFVNEEDGAISSK	WP_058845050.1 MULTISPECIES: leucine--tRNA ligase [Lysinibacillus]	630	645	1	1862.95	-0.0173983	-9.33912	2	30	0.0666667	198.042	0.0225236	2.02252	TRUE	FALSE	400	286	70.0686
F:\25-03-2022\20220324-TEST BROTH-POS-00.d	1533	scanId=852978		14.2162	453.232	657.259	2	904.45	29	2456.24	R.GIVAQDM(oxidation of M)R.T	GIVAQDMR	WP_012295562.1 MULTISPECIES: succinate dehydrogenase flavoprotein subunit [Lysinibacillus]	173	180	0	904.444	0.00655722	7.25	2	14	0.142857	55.1763	0.0224637	2.02246	TRUE	FALSE	401	286	70.0686
F:\25-03-2022\20220324-TEST BROTH-POS-00.d	6192	scanId=3512776		58.5461	490.225	2208.23	2	978.436	157	16025.5	R.SDAYPPSSR.I	SDAYPPSSR	WP_012291949.1 MULTISPECIES: DUF4132 domain-containing protein [Lysinibacillus]	477	485	0	978.441	-0.00461842	-4.72019	2	16	0.125	359.97	0.0224623	2.02246	TRUE	FALSE	402	286	70.0686
F:\25-03-2022\20220324-TEST BROTH-POS-00.d	2353	scanId=1341967		22.366	267.676	981.266	2	533.338	39	4362.6	K.IVFR.K	IVFR	DECOY_WP_217580422.1 MULTISPECIES: phage head closure protein [Lysinibacillus]	51	54	0	533.333	0.00496712	9.31337	2	6	0.333333	97.7892	0.0224153	2.02242	FALSE	TRUE	402	287	70.0686
F:\25-03-2022\20220324-TEST BROTH-POS-00.d	2743	scanId=1572493		26.2081	440.707	1141.99	2	879.4	63	6838.29	K.DWQEFR.Y	DWQEFR	DECOY_WP_227256841.1 MULTISPECIES: ABC transporter substrate-binding protein [Lysinibacillus]	329	334	0	879.388	0.0123413	14.034	2	10	0.2	152.123	0.0222457	2.02225	FALSE	TRUE	402	288	70.0686
F:\25-03-2022\20220324-TEST BROTH-POS-00.d	4656	scanId=2637249		43.954	613.365	1281.79	2	1224.71	86	5178.26	R.QSPLLTTLPAGK.Y	QSPLLTTLPAGK	WP_036161912.1 MULTISPECIES: MerR family transcriptional regulator [Lysinibacillus]	199	210	0	1224.71	0.00683477	5.58073	2	22	0.0909091	115.023	0.0222127	2.02221	TRUE	FALSE	403	288	70.0686
F:\25-03-2022\20220324-TEST BROTH-POS-00.d	6679	scanId=3792118		63.2018	978.939	1213.96	2	1955.86	116	7543.25	R.VAC[carbamidomethylation of C]HPEKQHTC[carbamidomethylation of C]DRYR.C	VACHPEKQHTCDRYR	DECOY_WP_031416590.1 MULTISPECIES: ribosome small subunit-dependent GTPase A [Lysinibacillus]	58	72	2	1955.88	-0.020602	-10.5333	2	28	0.0714286	166.921	0.0221285	2.02213	FALSE	TRUE	403	289	70.0686
F:\25-03-2022\20220324-TEST BROTH-POS-00.d	2082	scanId=1179204		19.6533	438.235	885.738	2	874.455	41	3770.93	K.LDAEGVGSK.T	LDAEGVGSK	WP_230591252.1 MULTISPECIES: YdcF family protein [Lysinibacillus]	209	217	0	874.44	0.0149891	17.1414	2	16	0.125	83.2611	0.0220798	2.02208	TRUE	FALSE	404	289	70.0686
F:\25-03-2022\20220324-TEST BROTH-POS-00.d	5180	scanId=2925562		48.7592	804.488	1227.03	2	1606.96	83	5506.05	K.AVKKELPPIGDISIK.G	AVKKELPPIGDISIK	WP_031415838.1 MULTISPECIES: spore protease YyaC [Lysinibacillus]	129	143	2	1606.97	-0.0049337	-3.0702	2	28	0.0714286	121.306	0.0220314	2.02203	TRUE	FALSE	405	289	70.0686
F:\25-03-2022\20220324-TEST BROTH-POS-00.d	4475	scanId=2546387		42.4397	1062.04	1417.76	2	2122.07	90	6264.08	K.MITGDEYIVLTDLVVQWK.I	MITGDEYIVLTDLVVQWK	WP_031418636.1 MULTISPECIES: FtsH protease activity modulator HflK [Lysinibacillus]	95	112	0	2122.1	-0.0272564	-12.8441	2	34	0.0588235	137.983	0.0220277	2.02203	TRUE	FALSE	406	289	70.0686
F:\25-03-2022\20220324-TEST BROTH-POS-00.d	3653	scanId=2109659		35.1609	655.326	1462.83	2	1308.64	73	4280.43	R.EAGGGQFMLKGSK.Y	EAGGGQFMLKGSK	DECOY_WP_103118620.1 MULTISPECIES: ribonuclease HIII [Lysinibacillus]	250	262	1	1308.65	-0.0130327	-9.9589	2	24	0.0833333	94.2335	0.022015	2.02201	FALSE	TRUE	406	290	70.0686
F:\25-03-2022\20220324-TEST BROTH-POS-00.d	2772	scanId=1588339		26.4722	669.815	902.668	2	1337.62	36	2344.75	R.AEAFAVC[carbamidomethylation of C]REASK.R	AEAFAVCREASK	WP_036225924.1 MULTISPECIES: preprotein translocase subunit SecA [Lysinibacillus]	63	74	1	1337.64	-0.0240171	-17.9548	2	22	0.0909091	51.5155	0.0219705	2.02197	TRUE	FALSE	407	290	70.0686
F:\25-03-2022\20220324-TEST BROTH-POS-00.d	4598	scanId=2607380		43.4562	606.367	4192.64	2	1210.72	119	10360.8	K.VTPQILATLQK.Y	VTPQILATLQK	WP_036161931.1 MULTISPECIES: polysaccharide deacetylase family protein [Lysinibacillus]	255	265	0	1210.73	-0.00841694	-6.95196	2	20	0.1	227.095	0.0219188	2.02192	TRUE	FALSE	408	290	70.0686
F:\25-03-2022\20220324-TEST BROTH-POS-00.d	5630	scanId=3190359		53.1725	794.422	679.919	2	1586.83	92	6453.42	K.GVSSSQIAGIGITNQR.E	GVSSSQIAGIGITNQR	WP_012292039.1 MULTISPECIES: glycerol kinase GlpK [Lysinibacillus]	69	84	0	1586.84	-0.00770841	-4.85772	2	30	0.0666667	140.258	0.0217339	2.02173	TRUE	FALSE	409	290	70.0686
F:\25-03-2022\20220324-TEST BROTH-POS-00.d	5439	scanId=3078727		51.312	645.399	1329.38	2	1288.78	74	5292.63	K.VHGRVIPAANKK.I	VHGRVIPAANKK	WP_012292233.1 MULTISPECIES: YvcK family protein [Lysinibacillus]	120	131	2	1288.77	0.0114475	8.88247	2	22	0.0909091	114.756	0.0216822	2.02168	TRUE	FALSE	410	290	70.0686
F:\25-03-2022\20220324-TEST BROTH-POS-00.d	4308	scanId=2464169		41.0694	769.4	1346.48	2	1536.79	57	3958.81	K.RTGTPIHPM(oxidation of M)SPLSK.I	RTGTPIHPMSPLSK	WP_036162469.1 MULTISPECIES: gluconokinase [Lysinibacillus]	123	136	1	1536.81	-0.0229655	-14.9436	2	26	0.0769231	85.7587	0.0216628	2.02166	TRUE	FALSE	411	290	70.0686
F:\25-03-2022\20220324-TEST BROTH-POS-00.d	2590	scanId=1481190		24.6864	576.273	566.031	2	1150.53	40	2301.61	K.KESSSGDAGADK.E	KESSSGDAGADK	WP_031418189.1 MULTISPECIES: transporter substrate-binding domain-containing protein [Lysinibacillus]	27	38	1	1150.51	0.0204026	17.7335	2	22	0.0909091	49.5938	0.0215474	2.02155	TRUE	FALSE	412	290	70.0686
F:\25-03-2022\20220324-TEST BROTH-POS-00.d	4546	scanId=2582552		43.0424	611.326	5258.69	2	1220.64	80	10248.3	K.KGAGVLYAEDAK.F	KGAGVLYAEDAK	DECOY_WP_090001958.1 MULTISPECIES: pyruvate carboxylase [Lysinibacillus]	1089	1100	1	1220.64	-0.00362001	-2.96567	2	22	0.0909091	220.739	0.0215391	2.02154	FALSE	TRUE	412	291	70.3103
F:\25-03-2022\20220324-TEST BROTH-POS-00.d	5222	scanId=2951991		49.1997	656.911	1716.07	2	1311.81	74	5451.41	-.MKEKVKPLVIK.K	MKEKVKPLVIK	DECOY_WP_126657189.1 MULTISPECIES: ribosome assembly RNA-binding protein YhbY [Lysinibacillus]	1	11	2	1311.83	-0.0246298	-18.7752	2	20	0.1	117.322	0.0215214	2.02152	FALSE	TRUE	412	292	70.5519
F:\25-03-2022\20220324-TEST BROTH-POS-00.d	2652	scanId=1518197		25.3031	421.758	4433.54	2	841.501	59	5843.94	K.LPRSEIK.S	LPRSEIK	DECOY_WP_012295456.1 MULTISPECIES: prephenate dehydratase [Lysinibacillus]	53	59	1	841.502	-0.00153563	-1.82487	2	12	0.166667	125.563	0.0214861	2.02149	FALSE	TRUE	412	293	70.572
F:\25-03-2022\20220324-TEST BROTH-POS-00.d	4517	scanId=2567282		42.7879	630.861	3200.38	2	1259.71	94	8102.63	K.LLTGVSEVLSSR.I	LLTGVSEVLSSR	DECOY_WP_036162287.1 MULTISPECIES: aspartate kinase [Lysinibacillus]	170	181	0	1259.71	-0.000773072	-0.613691	2	22	0.0909091	171.655	0.021185	2.02119	FALSE	TRUE	412	294	70.572
F:\25-03-2022\20220324-TEST BROTH-POS-00.d	2147	scanId=1218311		20.3051	359.22	1000.97	2	716.425	33	2358.3	R.VSRSLR.D	VSRSLR	WP_012293168.1 MULTISPECIES: RNA polymerase sporulation sigma factor SigG [Lysinibacillus]	113	118	1	716.429	-0.00417829	-5.83211	2	10	0.2	49.9099	0.0211636	2.02116	TRUE	FALSE	413	294	70.572
F:\25-03-2022\20220324-TEST BROTH-POS-00.d	4502	scanId=2560331		42.672	562.345	2121.56	2	1122.68	94	7098.27	K.LLIEPVNVAR.L	LLIEPVNVAR	DECOY_WP_031417798.1 MULTISPECIES: tetratricopeptide repeat protein [Lysinibacillus]	87	96	0	1122.68	-0.000902054	-0.803485	2	18	0.111111	149.016	0.0209933	2.02099	FALSE	TRUE	413	295	70.572
F:\25-03-2022\20220324-TEST BROTH-POS-00.d	5276	scanId=2981968		49.6993	848.51	818.298	2	1695.01	72	4735.84	K.VVKSIVAGEAQGSLLPK.A	VVKSIVAGEAQGSLLPK	DECOY_WP_031417061.1 MULTISPECIES: GatB/YqeY domain-containing protein [Lysinibacillus]	7	23	1	1694.99	0.0122996	7.25643	2	32	0.0625	99.0867	0.0209227	2.02092	FALSE	TRUE	413	296	70.572
F:\25-03-2022\20220324-TEST BROTH-POS-00.d	4463	scanId=2540342		42.3389	586.834	7319.27	2	1171.65	133	15028.9	K.LPDGVTKISDK.K	LPDGVTKISDK	WP_012296034.1 MULTISPECIES: CdaR family protein [Lysinibacillus]	292	302	1	1171.64	0.00820711	7.00478	2	20	0.1	314.205	0.0209068	2.02091	TRUE	FALSE	414	296	70.572
F:\25-03-2022\20220324-TEST BROTH-POS-00.d	5172	scanId=2921331		48.6887	948.516	678.48	2	1895.02	47	2460.37	K.EGKPLLWGAEDLLQQAK.E	EGKPLLWGAEDLLQQAK	DECOY_WP_233732737.1 MULTISPECIES: nickel ABC transporter substrate-binding protein [Lysinibacillus]	174	190	0	1895.02	0.00263307	1.38947	2	32	0.0625	51.0865	0.0207638	2.02076	FALSE	TRUE	414	297	70.572
F:\25-03-2022\20220324-TEST BROTH-POS-00.d	1095	scanId=597626		9.9603	504.256	1051.63	2	1006.5	36	2764.58	-.M(oxidation of M)SIREDIK.K	MSIREDIK	WP_031416518.1 MULTISPECIES: MurR/RpiR family transcriptional regulator [Lysinibacillus]	1	8	1	1006.51	-0.0133369	-13.2506	2	14	0.142857	57.0036	0.0206192	2.02062	TRUE	FALSE	415	297	70.572
F:\25-03-2022\20220324-TEST BROTH-POS-00.d	3030	scanId=1740790		29.013	977.036	564.373	2	1952.06	34	2153.26	R.QQRHLSLDDVAKATGVSK.A	QQRHLSLDDVAKATGVSK	WP_012292935.1 MULTISPECIES: XRE family transcriptional regulator [Lysinibacillus]	17	34	2	1952.04	0.0135614	6.94729	2	34	0.0588235	44.338	0.0205911	2.02059	TRUE	FALSE	416	297	70.572
F:\25-03-2022\20220324-TEST BROTH-POS-00.d	4294	scanId=2456715		40.9451	586.835	6076.76	2	1171.66	130	17080.6	K.LPDGVTKISDK.K	LPDGVTKISDK	WP_012296034.1 MULTISPECIES: CdaR family protein [Lysinibacillus]	292	302	1	1171.64	0.0110233	9.40844	2	20	0.1	350.446	0.0205172	2.02052	TRUE	FALSE	417	297	70.572
F:\25-03-2022\20220324-TEST BROTH-POS-00.d	5329	scanId=3012283		50.2046	968.489	503.747	2	1934.96	68	4630.9	K.YGKENLVM(oxidation of M)MWHRIDK.K	YGKENLVMMWHRIDK	DECOY_WP_036160791.1 MULTISPECIES: tyrosine-type recombinase/integrase [Lysinibacillus]	219	233	2	1934.95	0.013108	6.77433	2	28	0.0714286	94.5033	0.0204071	2.02041	FALSE	TRUE	417	298	70.572
F:\25-03-2022\20220324-TEST BROTH-POS-00.d	5464	scanId=3094685		51.578	913.01	975.077	2	1824.01	96	5801.23	R.KAIADLNIMNGRLHMK.E	KAIADLNIMNGRLHMK	WP_012295216.1 MULTISPECIES: deoxyribonuclease IV [Lysinibacillus]	43	58	2	1823.99	0.0191661	10.5078	2	30	0.0666667	117.832	0.0203115	2.02031	TRUE	FALSE	418	298	70.572
F:\25-03-2022\20220324-TEST BROTH-POS-00.d	4727	scanId=2673998		44.5665	696.9	3217.07	2	1391.79	121	9292.59	R.IFLSFAGNVVGGVL.-	IFLSFAGNVVGGVL	DECOY_WP_206700868.1 MULTISPECIES: KinB-signaling pathway activation protein [Lysinibacillus]	198	211	0	1391.78	0.00507899	3.64927	2	26	0.0769231	186.618	0.0200825	2.02008	FALSE	TRUE	418	299	70.572
F:\25-03-2022\20220324-TEST BROTH-POS-00.d	3070	scanId=1765616		29.4268	574.311	654.464	2	1146.61	53	2914.9	K.IMM(oxidation of M)IATPAKR.M	IMMIATPAKR	DECOY_WP_036161053.1 MULTISPECIES: hypothetical protein [Lysinibacillus]	9	18	1	1146.63	-0.0170501	-14.8698	2	18	0.111111	58.402	0.0200357	2.02004	FALSE	TRUE	418	300	70.572
F:\25-03-2022\20220324-TEST BROTH-POS-00.d	5263	scanId=2975705		49.5949	819.93	1238.77	2	1637.85	72	4276.84	K.DESSVIVRDIYKSK.N	DESSVIVRDIYKSK	DECOY_WP_012292908.1 MULTISPECIES: acylneuraminate cytidylyltransferase family protein [Lysinibacillus]	176	189	2	1637.86	-0.0172087	-10.5068	2	26	0.0769231	85.6302	0.0200218	2.02002	FALSE	TRUE	418	301	70.572
F:\25-03-2022\20220324-TEST BROTH-POS-00.d	5086	scanId=2869319		47.8218	828.978	1702.58	2	1655.94	87	5717.64	K.ALEAGELEGIKAAKEK.L	ALEAGELEGIKAAKEK	WP_012295327.1 MULTISPECIES: molecular chaperone DnaK [Lysinibacillus]	545	560	2	1655.91	0.0315185	19.0339	2	30	0.0666667	114.103	0.0199563	2.01996	TRUE	FALSE	419	301	70.572
F:\25-03-2022\20220324-TEST BROTH-POS-00.d	3963	scanId=2283679		38.0612	498.785	1656.36	2	995.556	87	7080.43	K.VGVNPGVAQR.M	VGVNPGVAQR	DECOY_WP_031417744.1 MULTISPECIES: deoxyribose-phosphate aldolase [Lysinibacillus]	35	44	0	995.551	0.00456911	4.58953	2	18	0.111111	140.913	0.0199017	2.0199	FALSE	TRUE	419	302	70.572
F:\25-03-2022\20220324-TEST BROTH-POS-00.d	5193	scanId=2933597		48.8931	1261.68	734.346	2	2521.35	73	4065.78	K.QLEVLQQIGKEGLALLENLEER.S	QLEVLQQIGKEGLALLENLEER	DECOY_WP_031419371.1 MULTISPECIES: ribonuclease PH [Lysinibacillus]	16	37	1	2521.38	-0.0218021	-8.64689	2	42	0.047619	80.2679	0.0197423	2.01974	FALSE	TRUE	419	303	70.572
F:\25-03-2022\20220324-TEST BROTH-POS-00.d	5015	scanId=2829079		47.1512	770.927	1511.06	2	1539.84	87	6170.1	K.QIEEALPVSIVGTGK.T	QIEEALPVSIVGTGK	WP_012292462.1 MULTISPECIES: acetamidase/formamidase family protein [Lysinibacillus]	369	383	0	1539.85	-0.0120108	-7.79998	2	28	0.0714286	121.164	0.0196373	2.01964	TRUE	FALSE	420	303	70.572
F:\25-03-2022\20220324-TEST BROTH-POS-00.d	4462	scanId=2540009		42.3334	630.861	9568.99	2	1259.71	152	16123.8	K.TALVTGSTRGIGK.A	TALVTGSTRGIGK	WP_217580989.1 MULTISPECIES: SDR family oxidoreductase [Lysinibacillus]	9	21	1	1259.72	-0.011934	-9.47354	2	24	0.0833333	316.063	0.0196023	2.0196	TRUE	FALSE	421	303	70.572
F:\25-03-2022\20220324-TEST BROTH-POS-00.d	3685	scanId=2126888		35.448	679.868	980	2	1357.72	57	3425.81	R.AELGEDAVILNSK.V	AELGEDAVILNSK	WP_012293280.1 MULTISPECIES: flagellar biosynthesis protein FlhF [Lysinibacillus]	20	32	0	1357.71	0.013381	9.85556	2	24	0.0833333	67.0024	0.0195581	2.01956	TRUE	FALSE	422	303	70.572
F:\25-03-2022\20220324-TEST BROTH-POS-00.d	2387	scanId=1363243		22.7206	539.27	606.496	2	1076.53	52	4486.97	R.DVGIRQM(oxidation of M)DK.L	DVGIRQMDK	DECOY_WP_036162215.1 MULTISPECIES: U32 family peptidase [Lysinibacillus]	222	230	1	1076.53	-0.00328176	-3.04847	2	16	0.125	87.0373	0.0193978	2.0194	FALSE	TRUE	422	304	70.572
F:\25-03-2022\20220324-TEST BROTH-POS-00.d	5023	scanId=2832400		47.2065	763.441	3169.9	2	1524.87	128	10689.8	K.ALKGTFILSHVDPK.S	ALKGTFILSHVDPK	WP_036161090.1 MULTISPECIES: YwhD family protein [Lysinibacillus]	126	139	1	1524.87	0.00176653	1.15848	2	26	0.0769231	207.026	0.0193666	2.01937	TRUE	FALSE	423	304	70.572
F:\25-03-2022\20220324-TEST BROTH-POS-00.d	4466	scanId=2542059		42.3675	608.848	4197.21	2	1215.68	112	10789.1	R.AITRSTKGQVR.L	AITRSTKGQVR	DECOY_WP_012293406.1 MULTISPECIES: site-specific tyrosine recombinase XerD [Lysinibacillus]	227	237	2	1215.7	-0.0231596	-19.0503	2	20	0.1	207.626	0.0192441	2.01924	FALSE	TRUE	423	305	70.572
F:\25-03-2022\20220324-TEST BROTH-POS-00.d	6622	scanId=3760291		62.6714	978.938	1486.39	2	1955.86	82	6115.6	K.FEFQM(oxidation of M)LYGFRTDMQK.E	FEFQMLYGFRTDMQK	WP_012291984.1 MULTISPECIES: proline dehydrogenase family protein [Lysinibacillus]	243	257	1	1955.89	-0.0298878	-15.2809	2	28	0.0714286	117.378	0.0191932	2.01919	TRUE	FALSE	424	305	70.572
F:\25-03-2022\20220324-TEST BROTH-POS-00.d	4458	scanId=2538067		42.301	631.36	3501.28	2	1260.7	161	16129.9	K.TTLLDSIRNTK.V	TTLLDSIRNTK	WP_068983117.1 MULTISPECIES: translation initiation factor IF-2 [Lysinibacillus]	276	286	1	1260.7	0.000745145	0.591055	2	20	0.1	309.023	0.0191583	2.01916	TRUE	FALSE	425	305	70.572
F:\25-03-2022\20220324-TEST BROTH-POS-00.d	6647	scanId=3774707		62.9117	799.466	1489.69	2	1596.92	124	8085.39	R.KILMIKLTMNPPAK.E	KILMIKLTMNPPAK	DECOY_WP_012292491.1 MULTISPECIES: NUDIX hydrolase [Lysinibacillus]	213	226	2	1596.95	-0.0279869	-17.5252	2	26	0.0769231	153.722	0.0190123	2.01901	FALSE	TRUE	425	306	70.572
F:\25-03-2022\20220324-TEST BROTH-POS-00.d	3819	scanId=2203103		36.7182	778.901	842.562	2	1555.79	57	3169.95	R.LLEM(oxidation of M)EQFGFSIVK.N	LLEMEQFGFSIVK	DECOY_WP_012294037.1 MULTISPECIES: GNAT family N-acetyltransferase [Lysinibacillus]	58	70	0	1555.8	-0.00867098	-5.57334	2	24	0.0833333	59.6783	0.0188263	2.01883	FALSE	TRUE	425	307	70.572
F:\25-03-2022\20220324-TEST BROTH-POS-00.d	2420	scanId=1382912		23.0484	349.226	1743.51	2	696.437	46	4841.31	R.VLGRPR.H	VLGRPR	WP_230584765.1 MULTISPECIES: TetR/AcrR family transcriptional regulator [Lysinibacillus]	10	15	0	696.439	-0.00257253	-3.69383	2	10	0.2	90.863	0.0187683	2.01877	TRUE	FALSE	426	307	70.572
F:\25-03-2022\20220324-TEST BROTH-POS-00.d	941	scanId=510847		8.51398	328.709	1776.12	2	655.403	55	4579.92	K.NGPKLK.N	NGPKLK	DECOY_WP_036161990.1 MULTISPECIES: non-ribosomal peptide synthetase [Lysinibacillus]	394	399	1	655.402	0.00128668	1.96319	2	10	0.2	85.5929	0.0186887	2.01869	FALSE	TRUE	426	308	70.572
F:\25-03-2022\20220324-TEST BROTH-POS-00.d	5550	scanId=3145285		52.4213	686.366	825.132	2	1370.72	63	3758.46	K.QAIEELQRQEK.Q	QAIEELQRQEK	WP_036160701.1 MULTISPECIES: AAA domain-containing protein [Lysinibacillus]	874	884	1	1370.72	0.00119572	0.872336	2	20	0.1	70.2225	0.0186838	2.01868	TRUE	FALSE	427	308	70.572
F:\25-03-2022\20220324-TEST BROTH-POS-00.d	3828	scanId=2207701		36.7949	1266.15	514.513	2	2530.28	45	2475.91	R.AMEFGLGFEVGKFANISLM(oxidation of M)AAALK.A	AMEFGLGFEVGKFANISLMAAALK	DECOY_WP_012293643.1 MULTISPECIES: chorismate synthase [Lysinibacillus]	125	148	1	2530.3	-0.0133369	-5.27088	2	46	0.0434783	46.0889	0.0186149	2.01861	FALSE	TRUE	427	309	70.572
F:\25-03-2022\20220324-TEST BROTH-POS-00.d	4264	scanId=2441879		40.6979	434.76	4298.6	2	867.506	92	9128.51	K.GYLFIKK.K	GYLFIKK	WP_139015331.1 MULTISPECIES: DUF2306 domain-containing protein [Lysinibacillus]	134	140	1	867.522	-0.0160029	-18.4466	2	12	0.166667	169.698	0.0185899	2.01859	TRUE	FALSE	428	309	70.572
F:\25-03-2022\20220324-TEST BROTH-POS-00.d	5558	scanId=3149500		52.4915	739.886	949.662	2	1477.76	96	6157.83	K.FHNYLSRKEER.L	FHNYLSRKEER	DECOY_WP_036162225.1 MULTISPECIES: cysteine desulfurase [Lysinibacillus]	116	126	2	1477.74	0.0142596	9.6496	2	20	0.1	114.06	0.0185228	2.01852	FALSE	TRUE	428	310	70.572
F:\25-03-2022\20220324-TEST BROTH-POS-00.d	3972	scanId=2288997		38.1498	479.246	3078.52	2	956.478	56	5950.63	K.FDKWFSK.W	FDKWFSK	WP_012295121.1 MULTISPECIES: C39 family peptidase [Lysinibacillus]	131	137	1	956.476	0.00256796	2.68481	2	12	0.166667	110.22	0.0185225	2.01852	TRUE	FALSE	429	310	70.572
F:\25-03-2022\20220324-TEST BROTH-POS-00.d	4578	scanId=2598020		43.3002	630.862	16072.6	2	1259.71	140	16268.4	R.VISDDVMVVRK.G	VISDDVMVVRK	DECOY_WP_012292015.1 MULTISPECIES: amidophosphoribosyltransferase [Lysinibacillus]	116	126	1	1259.69	0.0182915	14.5206	2	20	0.1	300.586	0.0184767	2.01848	FALSE	TRUE	429	311	70.572
F:\25-03-2022\20220324-TEST BROTH-POS-00.d	2079	scanId=1177487		19.6246	430.743	501.135	2	859.472	61	4839.18	K.QIIEETK.W	QIIEETK	DECOY_WP_031418674.1 MULTISPECIES: TetR/AcrR family transcriptional regulator [Lysinibacillus]	8	14	0	859.465	0.00655097	7.62214	2	12	0.166667	89.243	0.0184418	2.01844	FALSE	TRUE	429	312	70.572
F:\25-03-2022\20220324-TEST BROTH-POS-00.d	4934	scanId=2784454		46.4074	701.411	1472.3	2	1400.81	93	6530.55	R.EAIVAGSIKVSAEK.R	EAIVAGSIKVSAEK	WP_036161113.1 MULTISPECIES: BMP family ABC transporter substrate-binding protein [Lysinibacillus]	311	324	1	1400.79	0.020478	14.6189	2	26	0.0769231	118.1	0.0180842	2.01808	TRUE	FALSE	430	312	70.572
F:\25-03-2022\20220324-TEST BROTH-POS-00.d	2763	scanId=1583742		26.3956	465.767	856.604	2	929.52	51	4239	K.EEIPLTTK.E	EEIPLTTK	WP_012293798.1 MULTISPECIES: response regulator transcription factor [Lysinibacillus]	148	155	0	929.507	0.0128714	13.8475	2	14	0.142857	76.2181	0.0179802	2.01798	TRUE	FALSE	431	312	70.572
F:\25-03-2022\20220324-TEST BROTH-POS-00.d	3488	scanId=2012882		33.5479	644.339	1462.45	2	1286.66	62	3940.38	R.IDDASRGVEVAR.K	IDDASRGVEVAR	DECOY_WP_058843361.1 MULTISPECIES: NtaA/DmoA family FMN-dependent monooxygenase [Lysinibacillus]	177	188	1	1286.66	0.00561668	4.36533	2	22	0.0909091	70.8301	0.0179755	2.01798	FALSE	TRUE	431	313	70.572
F:\25-03-2022\20220324-TEST BROTH-POS-00.d	4298	scanId=2458764		40.9793	553.83	2520.94	2	1105.65	90	7605.49	R.MLKDM(oxidation of M)IVIK.R	MLKDMIVIK	WP_089986525.1 MULTISPECIES: TetR/AcrR family transcriptional regulator [Lysinibacillus]	122	130	1	1105.62	0.0215783	19.5169	2	16	0.125	136.653	0.0179677	2.01797	TRUE	FALSE	432	313	70.572
F:\25-03-2022\20220324-TEST BROTH-POS-00.d	5828	scanId=3305384		55.0896	1035.07	775.896	2	2068.12	101	5790.97	K.GNIWITGETLPILRNIMK.L	GNIWITGETLPILRNIMK	DECOY_WP_012293945.1 MULTISPECIES: ABC transporter ATP-binding protein [Lysinibacillus]	256	273	1	2068.15	-0.0337258	-16.3072	2	34	0.0588235	103.265	0.0178321	2.01783	FALSE	TRUE	432	314	70.572
F:\25-03-2022\20220324-TEST BROTH-POS-00.d	4719	scanId=2670701		44.5115	650.897	7716.13	2	1299.78	233	23318.6	K.AVSLETIKPSKK.D	AVSLETIKPSKK	DECOY_WP_012291882.1 MULTISPECIES: ribose-phosphate diphosphokinase [Lysinibacillus]	23	34	1	1299.78	0.00312149	2.40156	2	22	0.0909091	413.911	0.0177502	2.01775	FALSE	TRUE	432	315	70.572
F:\25-03-2022\20220324-TEST BROTH-POS-00.d	6306	scanId=3578507		59.6416	900.496	1838.47	2	1798.98	127	8207.58	R.IAPTVEINEGRINFNL.-	IAPTVEINEGRINFNL	DECOY_WP_012292915.1 MULTISPECIES: ribosome-associated translation inhibitor RaiA [Lysinibacillus]	168	183	1	1798.96	0.0202013	11.2295	2	30	0.0666667	145.577	0.0177369	2.01774	FALSE	TRUE	432	316	70.572
F:\25-03-2022\20220324-TEST BROTH-POS-00.d	4918	scanId=2775369		46.256	738.446	1761.67	2	1474.88	97	8511.35	K.LLAKNPSQTFTKK.E	LLAKNPSQTFTKK	WP_031419736.1 MULTISPECIES: response regulator transcription factor [Lysinibacillus]	166	178	2	1474.85	0.0257243	17.442	2	24	0.0833333	150.235	0.0176511	2.01765	TRUE	FALSE	433	316	70.572
F:\25-03-2022\20220324-TEST BROTH-POS-00.d	2334	scanId=1330498		22.1748	486.793	1067.65	2	971.571	49	3084.02	R.ALLSEVKGR.A	ALLSEVKGR	WP_012292232.1 MULTISPECIES: RNase adapter RapZ [Lysinibacillus]	135	143	1	971.576	-0.00583107	-6.00166	2	16	0.125	54.2827	0.0176013	2.0176	TRUE	FALSE	434	316	70.572
F:\25-03-2022\20220324-TEST BROTH-POS-00.d	4180	scanId=2398108		39.9683	540.329	3177.22	2	1078.64	105	8076.46	K.LQQLISKHI.-	LQQLISKHI	WP_012294001.1 MULTISPECIES: sporulation protein [Lysinibacillus]	247	255	1	1078.65	-0.00642008	-5.95196	2	16	0.125	140.713	0.0174226	2.01742	TRUE	FALSE	435	316	70.572
F:\25-03-2022\20220324-TEST BROTH-POS-00.d	4912	scanId=2771935		46.1988	765.414	1610.06	2	1528.81	58	3730.79	R.THELVIITGM(oxidation of M)SGAGK.T	THELVIITGMSGAGK	WP_012292232.1 MULTISPECIES: RNase adapter RapZ [Lysinibacillus]	11	25	0	1528.79	0.022162	14.4964	2	28	0.0714286	64.7937	0.0173673	2.01737	TRUE	FALSE	436	316	70.572
F:\25-03-2022\20220324-TEST BROTH-POS-00.d	4134	scanId=2375074		39.5844	423.739	3284.62	2	845.463	108	12070.5	K.APLTSVMK.G	APLTSVMK	DECOY_WP_036161681.1 MULTISPECIES: Ger(x)C family spore germination protein [Lysinibacillus]	163	170	0	845.468	-0.00527339	-6.23724	2	14	0.142857	208.76	0.0172951	2.0173	FALSE	TRUE	436	317	70.572
F:\25-03-2022\20220324-TEST BROTH-POS-00.d	6701	scanId=3804647		63.4106	555.278	2812.81	2	1108.54	214	23650	M.NEEAIKSYR.K	NEEAIKSYR	DECOY_WP_012292203.1 MULTISPECIES: YhgE/Pip domain-containing protein [Lysinibacillus]	2	10	1	1108.55	-0.00954983	-8.61469	2	16	0.125	407.577	0.0172337	2.01723	FALSE	TRUE	436	318	70.572
F:\25-03-2022\20220324-TEST BROTH-POS-00.d	4103	scanId=2358126		39.302	945.972	1504.22	2	1889.93	107	6771.48	K.QEELIEVIC[carbamidomethylation of C]QESGKTK.E	QEELIEVICQESGKTK	WP_217581672.1 MULTISPECIES: CoA-acylating methylmalonate-semialdehyde dehydrogenase [Lysinibacillus]	86	101	1	1889.94	-0.0113404	-6.00039	2	30	0.0666667	116.591	0.017218	2.01722	TRUE	FALSE	437	318	70.572
F:\25-03-2022\20220324-TEST BROTH-POS-00.d	2422	scanId=1384295		23.0714	738.37	389.641	2	1474.73	27	1913.43	K.VVSQEPTKTTDDR.I	VVSQEPTKTTDDR	DECOY_WP_008180720.1 MULTISPECIES: FliA/WhiG family RNA polymerase sigma factor [Lysinibacillus]	71	83	1	1474.73	-0.000448595	-0.304188	2	24	0.0833333	32.9417	0.0172161	2.01722	FALSE	TRUE	437	319	70.572
F:\25-03-2022\20220324-TEST BROTH-POS-00.d	4592	scanId=2604833		43.4138	619.871	3842.66	2	1237.73	108	8917.61	R.AYGILVHPQLK.S	AYGILVHPQLK	WP_080695228.1 MULTISPECIES: DUF2639 domain-containing protein [Lysinibacillus]	15	25	0	1237.72	0.00879136	7.10288	2	20	0.1	153.043	0.0171619	2.01716	TRUE	FALSE	438	319	70.572
F:\25-03-2022\20220324-TEST BROTH-POS-00.d	4400	scanId=2508666		41.811	597.299	2497.28	2	1192.58	86	7741.03	K.DDALDFALWK.A	DDALDFALWK	WP_068986561.1 MULTISPECIES: cysteine--tRNA ligase [Lysinibacillus]	176	185	0	1192.58	0.00624259	5.23454	2	18	0.111111	129.136	0.016682	2.01668	TRUE	FALSE	439	319	70.572
F:\25-03-2022\20220324-TEST BROTH-POS-00.d	3741	scanId=2159458		35.9908	740.377	1127.17	2	1478.74	57	3603.75	R.LFDLTEDDVTAIK.E	LFDLTEDDVTAIK	DECOY_WP_227256898.1 MULTISPECIES: sigma-70 family RNA polymerase sigma factor [Lysinibacillus]	81	93	0	1478.75	-0.0117829	-7.96815	2	24	0.0833333	59.8375	0.0166042	2.0166	FALSE	TRUE	439	320	70.572
F:\25-03-2022\20220324-TEST BROTH-POS-00.d	2201	scanId=1250383		20.8396	530.764	626.499	2	1059.51	46	2763.4	K.NNFEPVNAR.-	NNFEPVNAR	WP_012293131.1 MULTISPECIES: YugN family protein [Lysinibacillus]	125	133	0	1059.51	0.0027707	2.61508	2	16	0.125	45.715	0.016543	2.01654	TRUE	FALSE	440	320	70.572
F:\25-03-2022\20220324-TEST BROTH-POS-00.d	3769	scanId=2175023		36.2503	432.742	1431.11	2	863.468	59	5636.77	-.MISTVWK.T	MISTVWK	WP_031419221.1 MULTISPECIES: DNA polymerase III subunit delta [Lysinibacillus]	1	7	0	863.458	0.010948	12.6793	2	12	0.166667	92.5035	0.0164107	2.01641	TRUE	FALSE	441	320	70.572
F:\25-03-2022\20220324-TEST BROTH-POS-00.d	6096	scanId=3458770		57.646	1295.15	1175.67	2	2588.28	134	7747.05	M.MKYSKATNYALHTMVFLTNMPK.G	MKYSKATNYALHTMVFLTNMPK	WP_012295985.1 MULTISPECIES: Rrf2 family transcriptional regulator [Lysinibacillus]	2	23	2	2588.3	-0.0195665	-7.55959	2	42	0.047619	126.95	0.0163869	2.01639	TRUE	FALSE	442	320	70.572
F:\25-03-2022\20220324-TEST BROTH-POS-00.d	3912	scanId=2256440		37.6072	972.004	3663.02	2	1941.99	141	10356.7	M.LQEENKLFYVDM(oxidation of M)KNR.F	LQEENKLFYVDMKNR	DECOY_WP_175401676.1 MULTISPECIES: tRNA (adenosine(37)-N6)-dimethylallyltransferase MiaA [Lysinibacillus]	2	16	2	1941.96	0.0312148	16.0738	2	28	0.0714286	168.482	0.016268	2.01627	FALSE	TRUE	442	321	70.572
F:\25-03-2022\20220324-TEST BROTH-POS-00.d	3099	scanId=1781131		29.6854	824.379	765.145	2	1646.74	87	5672.71	K.VETYNDLAYSGMER.G	VETYNDLAYSGMER	DECOY_WP_036161060.1 MULTISPECIES: aldehyde dehydrogenase family protein [Lysinibacillus]	10	23	0	1646.72	0.0178886	10.8631	2	26	0.0769231	91.0532	0.0160511	2.01605	FALSE	TRUE	442	322	70.572
F:\25-03-2022\20220324-TEST BROTH-POS-00.d	2238	scanId=1273373		21.2228	792.386	395.24	2	1582.76	30	1699.86	-.MAFVITELC[carbamidomethylation of C]KDEK.A	MAFVITELCKDEK	WP_010858682.1 MULTISPECIES: ferredoxin family protein [Lysinibacillus]	1	13	1	1582.77	-0.0165489	-10.4556	2	24	0.0833333	27.0114	0.0158903	2.01589	TRUE	FALSE	443	322	70.572
F:\25-03-2022\20220324-TEST BROTH-POS-00.d	3491	scanId=2014598		33.5765	845.433	2280	2	1688.85	69	6631.61	K.SFKEEKIDAGFSFGK.L	SFKEEKIDAGFSFGK	WP_099805356.1 MULTISPECIES: polyprenyl synthetase family protein [Lysinibacillus]	32	46	2	1688.84	0.0111397	6.59606	2	28	0.0714286	102.407	0.0154423	2.01544	TRUE	FALSE	444	322	70.572
F:\25-03-2022\20220324-TEST BROTH-POS-00.d	4405	scanId=2510927		41.8486	630.86	2838.97	2	1259.71	96	6669.33	K.GIGRTSGTVLATK.N	GIGRTSGTVLATK	DECOY_WP_217580989.1 MULTISPECIES: SDR family oxidoreductase [Lysinibacillus]	246	258	1	1259.72	-0.0137921	-10.9485	2	24	0.0833333	102.78	0.0154108	2.01541	FALSE	TRUE	444	323	70.572
F:\25-03-2022\20220324-TEST BROTH-POS-00.d	3875	scanId=2235171		37.2527	504.253	1637.42	2	1006.49	93	7364.33	-.MDQQVMKK.L	MDQQVMKK	WP_012295770.1 MULTISPECIES: TraR/DksA C4-type zinc finger protein [Lysinibacillus]	1	8	1	1006.49	-0.00212793	-2.1142	2	14	0.142857	112.273	0.0152455	2.01525	TRUE	FALSE	445	323	70.572
F:\25-03-2022\20220324-TEST BROTH-POS-00.d	612	scanId=330442		5.50723	645.351	489.809	2	1288.69	28	2264.37	K.LAALFEQAGLEK.V	LAALFEQAGLEK	WP_012293618.1 MULTISPECIES: demethylmenaquinone methyltransferase [Lysinibacillus]	202	213	0	1288.7	-0.0143576	-11.1411	2	22	0.0909091	34.4537	0.0152156	2.01522	TRUE	FALSE	446	323	70.572
F:\25-03-2022\20220324-TEST BROTH-POS-00.d	4845	scanId=2735976		45.5995	696.899	6097.08	2	1391.78	153	14807.5	K.GLKTQLEEVFTK.S	GLKTQLEEVFTK	WP_227256932.1 MULTISPECIES: HAMP domain-containing histidine kinase [Lysinibacillus]	59	70	1	1391.77	0.0182598	13.1199	2	22	0.0909091	222.434	0.0150217	2.01502	TRUE	FALSE	447	323	70.572
F:\25-03-2022\20220324-TEST BROTH-POS-00.d	6453	scanId=3662229		61.037	757.452	1589.29	2	1512.89	191	16319	M.LVSEKEIVLEVKK.L	LVSEKEIVLEVKK	WP_174804706.1 MULTISPECIES: ATP-binding cassette domain-containing protein [Lysinibacillus]	2	14	2	1512.91	-0.0239918	-15.858	2	24	0.0833333	245.117	0.0150203	2.01502	TRUE	FALSE	448	323	70.572
F:\25-03-2022\20220324-TEST BROTH-POS-00.d	5963	scanId=3382938		56.3822	686.395	1340.73	2	1370.78	112	7361.01	K.QVRAVDLTARSR.D	QVRAVDLTARSR	WP_012292409.1 MULTISPECIES: DUF5808 domain-containing protein [Lysinibacillus]	109	120	2	1370.77	0.00207887	1.51657	2	22	0.0909091	110.174	0.0149672	2.01497	TRUE	FALSE	449	323	70.572
F:\25-03-2022\20220324-TEST BROTH-POS-00.d	6442	scanId=3656080		60.9345	486.308	3580.61	2	970.602	201	16689.4	R.RKGGSVIVR.I	RKGGSVIVR	DECOY_WP_012292453.1 MULTISPECIES: VanZ family protein [Lysinibacillus]	18	26	2	970.604	-0.00130021	-1.33959	2	16	0.125	246.606	0.0147762	2.01478	FALSE	TRUE	449	324	70.572
F:\25-03-2022\20220324-TEST BROTH-POS-00.d	4850	scanId=2739077		45.6512	738.949	6207.27	2	1475.88	227	21646.5	R.QFVRPLVYVISR.I	QFVRPLVYVISR	WP_012292525.1 MULTISPECIES: HAMP domain-containing histidine kinase [Lysinibacillus]	265	276	0	1475.86	0.0223186	15.1224	2	22	0.0909091	318.535	0.0147153	2.01472	TRUE	FALSE	450	324	70.572
F:\25-03-2022\20220324-TEST BROTH-POS-00.d	3896	scanId=2248076		37.4678	788.405	1919.5	2	1574.8	91	6291.31	K.WWREKPTGWMAK.F	WWREKPTGWMAK	WP_036160622.1 MULTISPECIES: APC family permease [Lysinibacillus]	395	406	1	1574.78	0.0134311	8.52888	2	22	0.0909091	92.4049	0.0146877	2.01469	TRUE	FALSE	451	324	70.572
F:\25-03-2022\20220324-TEST BROTH-POS-00.d	5241	scanId=2962907		49.3817	768.394	1585.68	2	1534.77	87	6096.42	R.GWQFIHSRWYR.W	GWQFIHSRWYR	WP_012292031.1 MULTISPECIES: cytochrome ubiquinol oxidase subunit I [Lysinibacillus]	345	355	1	1534.76	0.0143434	9.34573	2	20	0.1	89.4714	0.014676	2.01468	TRUE	FALSE	452	324	70.572
F:\25-03-2022\20220324-TEST BROTH-POS-00.d	2967	scanId=1702348		28.3723	466.773	1013.48	2	931.531	84	6275.01	K.LMKAWRK.V	LMKAWRK	WP_012292123.1 MULTISPECIES: thioredoxin-dependent thiol peroxidase [Lysinibacillus]	131	137	2	931.543	-0.0118953	-12.7694	2	12	0.166667	91.7896	0.0146278	2.01463	TRUE	FALSE	453	324	70.572
F:\25-03-2022\20220324-TEST BROTH-POS-00.d	5413	scanId=3063761		51.0626	1227.62	1499	2	2453.23	121	8448.16	R.LGPLEMQASSARDYVQMSTELK.D	LGPLEMQASSARDYVQMSTELK	WP_012293240.1 MULTISPECIES: chromosome segregation protein SMC [Lysinibacillus]	202	223	1	2453.19	0.0345473	14.0826	2	42	0.047619	122.092	0.0144519	2.01445	TRUE	FALSE	454	324	70.572
F:\25-03-2022\20220324-TEST BROTH-POS-00.d	3639	scanId=2101407		35.0233	628.341	1256.04	2	1254.67	81	7189.64	R.RYLADPHKQK.A	RYLADPHKQK	DECOY_WP_082011579.1 MULTISPECIES: reverse transcriptase domain-containing protein [Lysinibacillus]	171	180	2	1254.68	-0.0159322	-12.6982	2	18	0.111111	103.573	0.0144059	2.01441	FALSE	TRUE	454	325	70.572
F:\25-03-2022\20220324-TEST BROTH-POS-00.d	4094	scanId=2353696		39.2281	443.274	3965.97	2	884.533	123	11306.2	R.GVLAVRDR.H	GVLAVRDR	DECOY_WP_036160378.1 MULTISPECIES: ABC-F type ribosomal protection protein [Lysinibacillus]	613	620	1	884.519	0.0135198	15.2849	2	14	0.142857	161.895	0.0143192	2.01432	FALSE	TRUE	454	326	70.572
F:\25-03-2022\20220324-TEST BROTH-POS-00.d	4427	scanId=2522676		42.0445	571.814	1691.18	2	1141.61	78	5520.08	R.DLTEPVVELK.L	DLTEPVVELK	WP_227256845.1 MULTISPECIES: GNAT family N-acetyltransferase [Lysinibacillus]	156	165	0	1141.62	-0.00970959	-8.50507	2	18	0.111111	78.8394	0.0142823	2.01428	TRUE	FALSE	455	326	70.572
F:\25-03-2022\20220324-TEST BROTH-POS-00.d	2897	scanId=1662296		27.7048	565.336	694.412	2	1128.66	42	3189.13	K.SILVRPPYGK.K	SILVRPPYGK	WP_012295334.1 MULTISPECIES: polysaccharide deacetylase family protein [Lysinibacillus]	137	146	0	1128.67	-0.00854036	-7.56678	2	18	0.111111	45.425	0.0142437	2.01424	TRUE	FALSE	456	326	70.572
F:\25-03-2022\20220324-TEST BROTH-POS-00.d	4720	scanId=2671034		44.5171	716.436	3357.66	2	1430.86	124	9983.31	K.QKVIAAIYRLEK.E	QKVIAAIYRLEK	DECOY_WP_025114538.1 MULTISPECIES: MarR family transcriptional regulator [Lysinibacillus]	123	134	2	1430.86	-0.00404734	-2.8286	2	22	0.0909091	142.194	0.0142431	2.01424	FALSE	TRUE	456	327	70.572
F:\25-03-2022\20220324-TEST BROTH-POS-00.d	2940	scanId=1687835		28.1304	448.262	658.694	2	894.509	45	3411.96	K.M(oxidation of M)IAIYLR.N	MIAIYLR	DECOY_WP_012292719.1 MULTISPECIES: acyl-CoA dehydrogenase family protein [Lysinibacillus]	173	179	0	894.5	0.00916023	10.2406	2	12	0.166667	48.5329	0.0142244	2.01422	FALSE	TRUE	456	328	70.572
F:\25-03-2022\20220324-TEST BROTH-POS-00.d	5415	scanId=3065145		51.0856	1200.62	939.036	2	2399.22	83	5259.19	R.IMQAHNNVSVPDLQTILHVDR.E	IMQAHNNVSVPDLQTILHVDR	WP_025218805.1 MULTISPECIES: 1-deoxy-D-xylulose-5-phosphate reductoisomerase [Lysinibacillus]	350	370	0	2399.24	-0.0139316	-5.80668	2	40	0.05	73.8246	0.0140373	2.01404	TRUE	FALSE	457	328	70.572
F:\25-03-2022\20220324-TEST BROTH-POS-00.d	3889	scanId=2244309		37.405	795.43	786.205	2	1588.85	66	4296.12	R.VTQTYVSGNLKHDK.L	VTQTYVSGNLKHDK	DECOY_WP_196764890.1 MULTISPECIES: phage terminase large subunit family protein [Lysinibacillus]	24	37	1	1588.82	0.024646	15.5121	2	26	0.0769231	59.8841	0.0139391	2.01394	FALSE	TRUE	457	329	70.572
F:\25-03-2022\20220324-TEST BROTH-POS-00.d	4429	scanId=2523972		42.0661	584.358	16041.9	2	1166.7	213	24850.7	R.QLPIAKQIEK.L	QLPIAKQIEK	WP_012292541.1 MULTISPECIES: M20/M25/M40 family metallo-hydrolase [Lysinibacillus]	7	16	1	1166.7	-0.00126915	-1.08781	2	18	0.111111	345.361	0.0138974	2.0139	TRUE	FALSE	458	329	70.572
F:\25-03-2022\20220324-TEST BROTH-POS-00.d	4037	scanId=2323172		38.7194	520.798	2184.52	2	1039.58	82	7002.07	K.VSHIESLQK.K	VSHIESLQK	WP_036160581.1 MULTISPECIES: LytTR family transcriptional regulator [Lysinibacillus]	136	144	0	1039.57	0.0160989	15.4862	2	16	0.125	97.1841	0.0138793	2.01388	TRUE	FALSE	459	329	70.572
F:\25-03-2022\20220324-TEST BROTH-POS-00.d	4729	scanId=2674663		44.5776	718.911	2595.76	2	1435.81	97	7323.49	K.DIVTPLPGIGIDVK.I	DIVTPLPGIGIDVK	WP_031418282.1 MULTISPECIES: uroporphyrinogen decarboxylase [Lysinibacillus]	75	88	0	1435.83	-0.0204028	-14.2098	2	26	0.0769231	100.99	0.0137899	2.01379	TRUE	FALSE	460	329	70.572
F:\25-03-2022\20220324-TEST BROTH-POS-00.d	4108	scanId=2360675		39.3445	545.287	1645.48	2	1088.56	68	5288.85	R.EIDALGGVMGK.V	EIDALGGVMGK	WP_012296222.1 MULTISPECIES: tRNA uridine-5-carboxymethylaminomethyl(34) synthesis enzyme MnmG [Lysinibacillus]	65	75	0	1088.55	0.00660264	6.06552	2	20	0.1	72.4714	0.0137027	2.0137	TRUE	FALSE	461	329	70.572
F:\25-03-2022\20220324-TEST BROTH-POS-00.d	2560	scanId=1464292		24.4047	597.314	758.021	2	1192.61	51	5709.8	K.LFQLVTEESK.F	LFQLVTEESK	DECOY_WP_012295993.1 MULTISPECIES: ABC-F type ribosomal protection protein [Lysinibacillus]	109	118	0	1192.63	-0.0208494	-17.4818	2	18	0.111111	78.0573	0.0136708	2.01367	FALSE	TRUE	461	330	70.572
F:\25-03-2022\20220324-TEST BROTH-POS-00.d	2426	scanId=1386346		23.1056	415.748	761.163	2	829.481	55	4705.03	K.QARNLTK.N	QARNLTK	WP_012292936.1 MULTISPECIES: TVP38/TMEM64 family protein [Lysinibacillus]	199	205	1	829.477	0.00417155	5.02913	2	12	0.166667	64.1639	0.0136373	2.01364	TRUE	FALSE	462	330	70.572
F:\25-03-2022\20220324-TEST BROTH-POS-00.d	5146	scanId=2905712		48.4284	651.864	1307.82	2	1301.71	104	8040.53	K.GVSLARWAPFAK.K	GVSLARWAPFAK	DECOY_WP_012293679.1 MULTISPECIES: CoA-acylating methylmalonate-semialdehyde dehydrogenase [Lysinibacillus]	439	450	1	1301.72	-0.0117483	-9.02516	2	22	0.0909091	108.907	0.0135448	2.01354	FALSE	TRUE	462	331	70.572
F:\25-03-2022\20220324-TEST BROTH-POS-00.d	4726	scanId=2673665		44.5609	694.421	9848.56	2	1386.83	163	14329.6	K.GFVQDLIGRVKR.V	GFVQDLIGRVKR	WP_012292091.1 MULTISPECIES: YihY/virulence factor BrkB family protein [Lysinibacillus]	33	44	2	1386.81	0.0187026	13.486	2	22	0.0909091	192.244	0.0134158	2.01342	TRUE	FALSE	463	331	70.572
F:\25-03-2022\20220324-TEST BROTH-POS-00.d	4617	scanId=2617261		43.6209	650.395	4702.84	2	1298.78	98	7995.87	K.VLNDIVSVITAR.N	VLNDIVSVITAR	DECOY_WP_031418593.1 MULTISPECIES: N-acetyl-gamma-glutamyl-phosphate reductase [Lysinibacillus]	32	43	0	1298.76	0.0205544	15.8262	2	22	0.0909091	106.142	0.0132747	2.01327	FALSE	TRUE	463	332	70.572
F:\25-03-2022\20220324-TEST BROTH-POS-00.d	4591	scanId=2604500		43.4082	672.408	3665.49	2	1342.8	125	9522.33	K.RLMQEIIKQGK.Q	RLMQEIIKQGK	WP_012292289.1 MULTISPECIES: GNAT family N-acetyltransferase [Lysinibacillus]	101	111	2	1342.78	0.0263111	19.5946	2	20	0.1	125.05	0.0131323	2.01313	TRUE	FALSE	464	332	70.572
F:\25-03-2022\20220324-TEST BROTH-POS-00.d	4636	scanId=2627071		43.7844	633.339	5017.46	2	1264.66	83	8134.99	K.VSESYAIRANR.L	VSESYAIRANR	WP_012295943.1 MULTISPECIES: PLP-dependent aminotransferase family protein [Lysinibacillus]	342	352	1	1264.65	0.0120319	9.51401	2	20	0.1	106.497	0.0130913	2.01309	TRUE	FALSE	465	332	70.572
F:\25-03-2022\20220324-TEST BROTH-POS-00.d	4807	scanId=2715303		45.2549	685.907	1834.05	2	1369.8	86	5897.92	R.LNYITLRRPPK.K	LNYITLRRPPK	DECOY_WP_063389783.1 MULTISPECIES: YheC/YheD family protein [Lysinibacillus]	139	149	1	1369.82	-0.0194704	-14.2138	2	20	0.1	76.9707	0.0130505	2.01305	FALSE	TRUE	465	333	70.572
F:\25-03-2022\20220324-TEST BROTH-POS-00.d	4891	scanId=2760589		46.0097	718.914	9824.15	2	1435.81	193	20309.1	K.KQIMKAAFDAVSK.L	KQIMKAAFDAVSK	WP_031417850.1 MULTISPECIES: TetR/AcrR family transcriptional regulator [Lysinibacillus]	10	22	2	1435.79	0.0269782	18.7899	2	24	0.0833333	263.73	0.0129858	2.01299	TRUE	FALSE	466	333	70.572
F:\25-03-2022\20220324-TEST BROTH-POS-00.d	3923	scanId=2262255		37.7041	454.757	1902.52	2	907.5	63	7299.58	K.KIMNKM(oxidation of M)K.E	KIMNKMK	WP_012292938.1 MULTISPECIES: helicase-exonuclease AddAB subunit AddA [Lysinibacillus]	324	330	2	907.498	0.00120343	1.3261	2	12	0.166667	94.4371	0.0129373	2.01294	TRUE	FALSE	467	333	70.572
F:\25-03-2022\20220324-TEST BROTH-POS-00.d	4907	scanId=2769552		46.1591	716.434	20058.1	2	1430.85	201	17919.4	K.KAYALLEKNILR.D	KAYALLEKNILR	DECOY_WP_112116474.1 MULTISPECIES: uroporphyrinogen-III C-methyltransferase [Lysinibacillus]	213	224	2	1430.86	-0.00655338	-4.58003	2	22	0.0909091	229.845	0.0128266	2.01283	FALSE	TRUE	467	334	70.572
F:\25-03-2022\20220324-TEST BROTH-POS-00.d	4136	scanId=2375740		39.5955	421.763	3444.55	2	841.512	238	29923.8	R.LVNGALQK.L	LVNGALQK	WP_241744852.1 MULTISPECIES: 3-hydroxyacyl-CoA dehydrogenase/enoyl-CoA hydratase family protein [Lysinibacillus]	46	53	0	841.502	0.0100677	11.9639	2	14	0.142857	372.242	0.0124397	2.01244	TRUE	FALSE	468	334	70.572
F:\25-03-2022\20220324-TEST BROTH-POS-00.d	5366	scanId=3034836		50.5805	569.351	1271.03	2	1136.69	89	6655.01	K.KAVFRLTFR.T	KAVFRLTFR	DECOY_WP_031418765.1 MULTISPECIES: RluA family pseudouridine synthase [Lysinibacillus]	292	300	2	1136.68	0.00498344	4.3842	2	16	0.125	82.7426	0.0124331	2.01243	FALSE	TRUE	468	335	70.572
F:\25-03-2022\20220324-TEST BROTH-POS-00.d	4414	scanId=2515311		41.9217	564.822	2225.6	2	1127.63	96	9298.3	R.SVIVELDTPR.H	SVIVELDTPR	WP_031416357.1 MULTISPECIES: bifunctional homocysteine S-methyltransferase/methylenetetrahydrofolate reductase [Lysinibacillus]	321	330	0	1127.62	0.0101057	8.96196	2	18	0.111111	115.309	0.0124011	2.0124	TRUE	FALSE	469	335	70.572
F:\25-03-2022\20220324-TEST BROTH-POS-00.d	5282	scanId=2985736		49.7621	697.891	1458	2	1393.77	87	7002.23	K.LKTGMAIYKNQK.L	LKTGMAIYKNQK	WP_227256883.1 MULTISPECIES: GNAT family N-acetyltransferase [Lysinibacillus]	95	106	2	1393.78	-0.00698765	-5.01347	2	22	0.0909091	86.743	0.0123879	2.01239	TRUE	FALSE	470	335	70.572
F:\25-03-2022\20220324-TEST BROTH-POS-00.d	4764	scanId=2693885		44.898	674.888	11765.9	2	1347.76	160	15786.3	K.MLEAQFLQLKK.L	MLEAQFLQLKK	WP_031416080.1 MULTISPECIES: EAL domain-containing protein [Lysinibacillus]	260	270	1	1347.76	0.00345799	2.56573	2	20	0.1	194.378	0.0123131	2.01231	TRUE	FALSE	471	335	70.572
F:\25-03-2022\20220324-TEST BROTH-POS-00.d	5240	scanId=2962574		49.3761	665.42	5790.73	2	1328.83	102	8785.67	R.KLDSVFLIGPLK.E	KLDSVFLIGPLK	DECOY_WP_012293154.1 MULTISPECIES: penicillin-binding protein [Lysinibacillus]	570	581	1	1328.81	0.0187464	14.1077	2	22	0.0909091	108.156	0.0123105	2.01231	FALSE	TRUE	471	336	70.572
F:\25-03-2022\20220324-TEST BROTH-POS-00.d	4900	scanId=2765740		46.0955	707.924	2436	2	1413.83	85	6288.51	K.VIGGGLPIGAYGGRK.E	VIGGGLPIGAYGGRK	WP_031416899.1 MULTISPECIES: glutamate-1-semialdehyde 2,1-aminomutase [Lysinibacillus]	269	283	1	1413.81	0.0235656	16.6682	2	28	0.0714286	76.7551	0.0122056	2.01221	TRUE	FALSE	472	336	70.572
F:\25-03-2022\20220324-TEST BROTH-POS-00.d	2793	scanId=1600638		26.6772	780.905	924.283	2	1559.8	47	3403.44	K.QFDVGVVAEVGRER.E	QFDVGVVAEVGRER	WP_036160980.1 MULTISPECIES: glycerol-3-phosphate dehydrogenase/oxidase [Lysinibacillus]	73	86	1	1559.81	-0.00934253	-5.98954	2	26	0.0769231	41.0304	0.0120556	2.01206	TRUE	FALSE	473	336	70.572
F:\25-03-2022\20220324-TEST BROTH-POS-00.d	3181	scanId=1830594		30.5098	528.313	1151.65	2	1054.61	59	4499.74	K.QVGVAEALLR.H	QVGVAEALLR	DECOY_WP_012292058.1 MULTISPECIES: ribonuclease J [Lysinibacillus]	147	156	0	1054.61	-0.0025019	-2.37234	2	18	0.111111	53.5048	0.0118906	2.01189	FALSE	TRUE	473	337	70.572
F:\25-03-2022\20220324-TEST BROTH-POS-00.d	4068	scanId=2339849		38.9973	501.259	4572.09	2	1000.5	72	8251.94	K.EDLQQRGR.V	EDLQQRGR	WP_036162603.1 MULTISPECIES: PolC-type DNA polymerase III [Lysinibacillus]	1409	1416	1	1000.51	-0.00168284	-1.68199	2	14	0.142857	97.7769	0.011849	2.01185	TRUE	FALSE	474	337	70.572
F:\25-03-2022\20220324-TEST BROTH-POS-00.d	4507	scanId=2562670		42.711	650.395	3999.32	2	1298.78	124	10569.5	K.VLNDIVSVITAR.N	VLNDIVSVITAR	DECOY_WP_031418593.1 MULTISPECIES: N-acetyl-gamma-glutamyl-phosphate reductase [Lysinibacillus]	32	43	0	1298.76	0.0205192	15.7991	2	22	0.0909091	125.151	0.0118408	2.01184	FALSE	TRUE	474	338	70.572
F:\25-03-2022\20220324-TEST BROTH-POS-00.d	4625	scanId=2621256		43.6875	674.887	8762.56	2	1347.76	163	17692.5	K.LQLFQAELMKK.E	LQLFQAELMKK	DECOY_WP_031416080.1 MULTISPECIES: EAL domain-containing protein [Lysinibacillus]	135	145	1	1347.76	0.00191503	1.4209	2	20	0.1	207.584	0.0117329	2.01173	FALSE	TRUE	474	339	70.572
F:\25-03-2022\20220324-TEST BROTH-POS-00.d	4790	scanId=2707413		45.1234	674.888	6078.75	2	1347.76	127	11624.8	K.GKGNFVGKVTTLK.T	GKGNFVGKVTTLK	WP_012295996.1 MULTISPECIES: PLP-dependent aminotransferase family protein [Lysinibacillus]	78	90	2	1347.79	-0.0256997	-19.0681	2	24	0.0833333	135.024	0.0116152	2.01162	TRUE	FALSE	475	339	70.572
F:\25-03-2022\20220324-TEST BROTH-POS-00.d	4057	scanId=2334035		38.9004	474.292	2106.62	2	946.569	104	9156.04	K.VFVKRNGK.T	VFVKRNGK	WP_036161990.1 MULTISPECIES: non-ribosomal peptide synthetase [Lysinibacillus]	1403	1410	2	946.571	-0.00268349	-2.83496	2	14	0.142857	105.943	0.0115708	2.01157	TRUE	FALSE	476	339	70.572
F:\25-03-2022\20220324-TEST BROTH-POS-00.d	4377	scanId=2497372		41.6227	447.766	4486.16	2	893.518	140	15884	K.GVHIPMLK.D	GVHIPMLK	WP_012292489.1 MULTISPECIES: urocanate hydratase [Lysinibacillus]	545	552	0	893.516	0.0021338	2.38809	2	14	0.142857	183.547	0.0115555	2.01156	TRUE	FALSE	477	339	70.572
F:\25-03-2022\20220324-TEST BROTH-POS-00.d	4341	scanId=2481626		41.3603	564.822	9491.71	2	1127.63	133	16565	-.M(oxidation of M)KSHQLKLK.N	MKSHQLKLK	WP_012292466.1 MULTISPECIES: sensor domain-containing diguanylate cyclase [Lysinibacillus]	1	9	2	1127.65	-0.0199728	-17.7119	2	16	0.125	191.326	0.01155	2.01155	TRUE	FALSE	478	339	70.572
F:\25-03-2022\20220324-TEST BROTH-POS-00.d	4554	scanId=2585932		43.0987	597.856	1636.1	2	1193.7	82	6156.25	R.KEIELFFIR.N	KEIELFFIR	DECOY_WP_012291661.1 MULTISPECIES: S-4TM family putative pore-forming effector [Lysinibacillus]	214	222	1	1193.68	0.0174953	14.6566	2	16	0.125	70.2086	0.0114044	2.0114	FALSE	TRUE	478	340	70.572
F:\25-03-2022\20220324-TEST BROTH-POS-00.d	5119	scanId=2889039		48.1505	804.989	2485.18	2	1607.96	120	9535.41	K.VKRFYATIIEIQK.F	VKRFYATIIEIQK	DECOY_WP_036160542.1 MULTISPECIES: GNAT family N-acetyltransferase [Lysinibacillus]	61	73	2	1607.94	0.0235971	14.6754	2	24	0.0833333	108.295	0.0113572	2.01136	FALSE	TRUE	478	341	70.572
F:\25-03-2022\20220324-TEST BROTH-POS-00.d	4603	scanId=2609762		43.4959	677.364	1738.37	2	1352.71	71	5883.46	K.QPDIELRVEVR.H	QPDIELRVEVR	WP_012295643.1 MULTISPECIES: tRNA 4-thiouridine(8) synthase ThiI [Lysinibacillus]	146	156	1	1352.74	-0.0269882	-19.9508	2	20	0.1	65.194	0.0110809	2.01108	TRUE	FALSE	479	341	70.572
F:\25-03-2022\20220324-TEST BROTH-POS-00.d	4890	scanId=2760256		46.0041	555.353	10698.4	2	1108.69	130	13491.3	R.LHKALKIMR.K	LHKALKIMR	WP_031416685.1 MULTISPECIES: RNA polymerase sigma factor [Lysinibacillus]	149	157	2	1108.69	0.000153141	0.138128	2	16	0.125	149.337	0.0110692	2.01107	TRUE	FALSE	480	341	70.572
F:\25-03-2022\20220324-TEST BROTH-POS-00.d	5037	scanId=2840986		47.3496	602.361	3411.73	2	1202.71	91	8463.4	R.MLLGRPFEIK.G	MLLGRPFEIK	WP_229388779.1 MULTISPECIES: riboflavin biosynthesis protein RibF [Lysinibacillus]	185	194	0	1202.68	0.0220009	18.2932	2	18	0.111111	92.8437	0.01097	2.01097	TRUE	FALSE	481	341	70.572
F:\25-03-2022\20220324-TEST BROTH-POS-00.d	5511	scanId=3122670		52.0444	1439.78	1142.93	2	2877.54	100	5987.05	R.DYLTFDGVTVVDIGLQLQKEIRSLR.I	DYLTFDGVTVVDIGLQLQKEIRSLR	DECOY_WP_036161751.1 MULTISPECIES: 5-methyltetrahydropteroyltriglutamate--homocysteine S-methyltransferase [Lysinibacillus]	699	723	2	2877.56	-0.0239245	-8.31416	2	48	0.0416667	65.5309	0.0109454	2.01095	FALSE	TRUE	481	342	70.7789
F:\25-03-2022\20220324-TEST BROTH-POS-00.d	4460	scanId=2539387		42.323	628.382	13933	2	1254.75	178	17396.9	K.IITFQKYKSK.S	IITFQKYKSK	DECOY_WP_217580955.1 MULTISPECIES: DNA topoisomerase III [Lysinibacillus]	638	647	2	1254.73	0.0154268	12.2949	2	18	0.111111	190.079	0.010926	2.01093	FALSE	TRUE	481	343	70.7836
F:\25-03-2022\20220324-TEST BROTH-POS-00.d	4651	scanId=2634867		43.9143	674.888	5221.72	2	1347.76	95	8814.64	K.IHTINPVDRGVK.L	IHTINPVDRGVK	DECOY_WP_012291919.1 MULTISPECIES: 4-hydroxy-tetrahydrodipicolinate synthase [Lysinibacillus]	139	150	1	1347.76	-0.00168041	-1.24681	2	22	0.0909091	96.178	0.0109112	2.01091	FALSE	TRUE	481	344	70.7836
F:\25-03-2022\20220324-TEST BROTH-POS-00.d	3915	scanId=2258156		37.6358	982.495	1310.02	2	1962.98	58	4597.02	K.RNPIGSENMVGMSRLM(oxidation of M)R.G	RNPIGSENMVGMSRLMR	WP_012292010.1 MULTISPECIES: adenylosuccinate lyase [Lysinibacillus]	269	285	2	1962.96	0.0210289	10.7129	2	32	0.0625	50.0536	0.0108883	2.01089	TRUE	FALSE	482	344	70.7836
F:\25-03-2022\20220324-TEST BROTH-POS-00.d	4691	scanId=2656548		44.2757	652.875	9720.44	2	1303.74	143	14555.4	R.GC[carbamidomethylation of C]LVAVKTISEK.T	GCLVAVKTISEK	DECOY_WP_025219541.1 MULTISPECIES: MoeB/ThiF family adenylyltransferase [Lysinibacillus]	76	87	1	1303.72	0.0187361	14.3713	2	22	0.0909091	155.776	0.0107023	2.0107	FALSE	TRUE	482	345	70.7836
F:\25-03-2022\20220324-TEST BROTH-POS-00.d	4955	scanId=2795132		46.5854	474.308	2001.41	2	946.602	89	7922.52	-.MLTKLLTK.D	MLTKLLTK	WP_036161116.1 MULTISPECIES: PTS sugar transporter subunit IIA [Lysinibacillus]	1	8	1	946.589	0.0134338	14.1918	2	14	0.142857	82.9643	0.010472	2.01047	TRUE	FALSE	483	345	70.7836
F:\25-03-2022\20220324-TEST BROTH-POS-00.d	4665	scanId=2642316		44.0385	655.855	3739.14	2	1309.7	87	11224	K.GPLKKTSTYGMK.V	GPLKKTSTYGMK	DECOY_WP_024363127.1 MULTISPECIES: tRNA 2-thiouridine(34) synthase MnmA [Lysinibacillus]	74	85	2	1309.71	-0.0103354	-7.89136	2	22	0.0909091	117.088	0.0104319	2.01043	FALSE	TRUE	483	346	70.7836
F:\25-03-2022\20220324-TEST BROTH-POS-00.d	4995	scanId=2818331		46.9721	738.452	7267.56	2	1474.89	195	18776.6	R.LQDLPISHIALKK.A	LQDLPISHIALKK	DECOY_WP_012292961.1 MULTISPECIES: CYTH domain-containing protein [Lysinibacillus]	81	93	1	1474.89	0.00157808	1.06997	2	24	0.0833333	192.809	0.0102686	2.01027	FALSE	TRUE	483	347	70.7836
F:\25-03-2022\20220324-TEST BROTH-POS-00.d	4454	scanId=2536736		42.2788	606.369	2453.88	2	1210.72	94	8208.25	K.QLKKYIYQK.E	QLKKYIYQK	WP_012293045.1 MULTISPECIES: CBS domain-containing protein [Lysinibacillus]	137	145	2	1210.71	0.0159629	13.1848	2	16	0.125	82.7173	0.0100773	2.01008	TRUE	FALSE	484	347	70.7836
F:\25-03-2022\20220324-TEST BROTH-POS-00.d	4251	scanId=2434771		40.5794	542.81	10038	2	1083.61	158	18359	K.VLIHVSNFR.K	VLIHVSNFR	WP_012293660.1 MULTISPECIES: N-acetyl-alpha-D-glucosaminyl L-malate synthase BshA [Lysinibacillus]	201	209	0	1083.62	-0.0131096	-12.098	2	16	0.125	183.32	0.0099853	2.00999	TRUE	FALSE	485	347	70.7836
F:\25-03-2022\20220324-TEST BROTH-POS-00.d	4827	scanId=2727283		45.4546	740.926	2514.78	2	1479.84	159	12497	K.FGKDIVVDLVGYR.R	FGKDIVVDLVGYR	WP_036161628.1 MULTISPECIES: 2-oxoglutarate dehydrogenase E1 component [Lysinibacillus]	445	457	1	1479.81	0.0283806	19.1786	2	24	0.0833333	124.365	0.00995161	2.00995	TRUE	FALSE	486	347	70.7836
F:\25-03-2022\20220324-TEST BROTH-POS-00.d	4534	scanId=2576478		42.9412	652.876	5429.57	2	1303.74	149	15346.9	R.ALLRASVYGNLK.I	ALLRASVYGNLK	WP_031419728.1 MULTISPECIES: phosphoenolpyruvate--protein phosphotransferase [Lysinibacillus]	376	387	1	1303.76	-0.0245034	-18.7944	2	22	0.0909091	152.166	0.00991507	2.00992	TRUE	FALSE	487	347	70.7836
F:\25-03-2022\20220324-TEST BROTH-POS-00.d	5059	scanId=2853032		47.5504	804.484	1581.98	2	1606.95	97	5837.03	K.VDELGRVVIPIELR.R	VDELGRVVIPIELR	WP_010857015.1 MULTISPECIES: AbrB/MazE/SpoVT family DNA-binding domain-containing protein [Lysinibacillus]	10	23	1	1606.94	0.0129444	8.05533	2	26	0.0769231	57.7465	0.00989312	2.00989	TRUE	FALSE	488	347	70.7836
F:\25-03-2022\20220324-TEST BROTH-POS-00.d	4672	scanId=2645915		44.0984	641.882	4911.42	2	1281.75	100	8930.99	K.LVNVYLSSFIK.D	LVNVYLSSFIK	DECOY_WP_036160835.1 MULTISPECIES: DUF115 domain-containing protein [Lysinibacillus]	431	441	0	1281.73	0.0167361	13.0574	2	20	0.1	86.6978	0.00970752	2.00971	FALSE	TRUE	488	348	70.9876
F:\25-03-2022\20220324-TEST BROTH-POS-00.d	4752	scanId=2687051		44.7841	663.896	5053	2	1325.78	117	8226.38	K.NAPLPIYLQLGK.G	NAPLPIYLQLGK	DECOY_WP_107922636.1 MULTISPECIES: DNA ligase D [Lysinibacillus]	123	134	0	1325.77	0.00733958	5.53608	2	22	0.0909091	79.7045	0.00968889	2.00969	FALSE	TRUE	488	349	71.046
F:\25-03-2022\20220324-TEST BROTH-POS-00.d	1796	scanId=1010584		16.8429	527.776	705.563	2	1053.54	58	4963.93	K.TWFTPFQK.-	TWFTPFQK	WP_048391937.1 MULTISPECIES: extracellular solute-binding protein [Lysinibacillus]	423	430	0	1053.53	0.00909696	8.63475	2	14	0.142857	47.3417	0.00953713	2.00954	TRUE	FALSE	489	349	71.046
F:\25-03-2022\20220324-TEST BROTH-POS-00.d	6451	scanId=3661563		61.0259	642.403	2562.73	2	1282.79	160	13513.3	K.LARIIDLSINR.L	LARIIDLSINR	DECOY_WP_115673784.1 MULTISPECIES: carbamoyl-phosphate synthase large subunit [Lysinibacillus]	792	802	1	1282.77	0.0190626	14.8605	2	20	0.1	127.866	0.00946226	2.00946	FALSE	TRUE	489	350	71.2495
F:\25-03-2022\20220324-TEST BROTH-POS-00.d	4139	scanId=2377456		39.6241	496.303	4061.13	2	990.591	114	9446.47	K.LSKQFIQK.G	LSKQFIQK	DECOY_WP_008180761.1 MULTISPECIES: flagellar basal body-associated protein FliL [Lysinibacillus]	26	33	1	990.586	0.00471287	4.75765	2	14	0.142857	89.2083	0.00944356	2.00944	FALSE	TRUE	489	351	71.2772
F:\25-03-2022\20220324-TEST BROTH-POS-00.d	4171	scanId=2393675		39.8944	518.318	12415.8	2	1034.62	181	17319.9	K.ETLIIKYR.T	ETLIIKYR	WP_012291831.1 MULTISPECIES: DNA replication/repair protein RecF [Lysinibacillus]	219	226	1	1034.61	0.00917137	8.86454	2	14	0.142857	163.542	0.00944246	2.00944	TRUE	FALSE	490	351	71.2772
F:\25-03-2022\20220324-TEST BROTH-POS-00.d	4874	scanId=2750751		45.8457	696.9	4455.67	2	1391.78	133	11064.5	R.LLDKGVVNMLYK.M	LLDKGVVNMLYK	DECOY_WP_012293038.1 MULTISPECIES: TetR/AcrR family transcriptional regulator [Lysinibacillus]	96	107	1	1391.78	3.62487e-05	0.0260448	2	22	0.0909091	103.524	0.00935638	2.00936	FALSE	TRUE	490	352	71.2772
F:\25-03-2022\20220324-TEST BROTH-POS-00.d	4533	scanId=2576146		42.9356	650.396	9132.59	2	1298.78	219	23086.4	K.IEKQLMIPSLK.E	IEKQLMIPSLK	DECOY_WP_036161535.1 MULTISPECIES: FMN-binding negative transcriptional regulator [Lysinibacillus]	58	68	1	1298.76	0.0146982	11.3171	2	20	0.1	213.829	0.00926211	2.00926	FALSE	TRUE	490	353	71.2772
F:\25-03-2022\20220324-TEST BROTH-POS-00.d	4366	scanId=2492389		41.5397	500.803	1384.32	2	999.591	107	8249.72	K.KELGDILGR.K	KELGDILGR	WP_012293305.1 MULTISPECIES: 30S ribosome-binding factor RbfA [Lysinibacillus]	14	22	1	999.571	0.0196853	19.6938	2	16	0.125	76.1853	0.00923489	2.00923	TRUE	FALSE	491	353	71.2772
F:\25-03-2022\20220324-TEST BROTH-POS-00.d	4828	scanId=2727616		45.4601	704.886	1759.17	2	1407.76	119	8726.46	R.AYIFLNQDLSPK.Q	AYIFLNQDLSPK	WP_012293464.1 MULTISPECIES: ImmA/IrrE family metallo-endopeptidase [Lysinibacillus]	55	66	0	1407.74	0.0167132	11.8724	2	22	0.0909091	80.5525	0.00923084	2.00923	TRUE	FALSE	492	353	71.2772
F:\25-03-2022\20220324-TEST BROTH-POS-00.d	4373	scanId=2496041		41.6005	608.846	7853.92	2	1215.68	139	14500.4	K.TGIISQSLGRGK.H	TGIISQSLGRGK	WP_012293213.1 MULTISPECIES: ribosome small subunit-dependent GTPase A [Lysinibacillus]	188	199	1	1215.69	-0.0154286	-12.6912	2	22	0.0909091	133.6	0.00921355	2.00921	TRUE	FALSE	493	353	71.2772
F:\25-03-2022\20220324-TEST BROTH-POS-00.d	4741	scanId=2681808		44.6967	675.389	6650.27	2	1348.76	176	20438.1	K.QFVPLVPKM(oxidation of M)FK.I	QFVPLVPKMFK	DECOY_WP_241744838.1 MULTISPECIES: phage tail tape measure protein [Lysinibacillus]	569	579	1	1348.76	0.00659242	4.88777	2	20	0.1	187.481	0.00917313	2.00917	FALSE	TRUE	493	354	71.4482
F:\25-03-2022\20220324-TEST BROTH-POS-00.d	6071	scanId=3444308		57.405	572.862	2095.97	2	1143.71	194	17611.9	K.KNTINKVVTK.Q	KNTINKVVTK	DECOY_WP_036162131.1 MULTISPECIES: penicillin-binding protein 2 [Lysinibacillus]	433	442	2	1143.7	0.010907	9.53657	2	18	0.111111	157.624	0.00894983	2.00895	FALSE	TRUE	493	355	71.4482
F:\25-03-2022\20220324-TEST BROTH-POS-00.d	4433	scanId=2525989		42.0997	586.834	11779.2	2	1171.65	155	16320.8	R.FYLEFVAKR.Q	FYLEFVAKR	DECOY_WP_012292493.1 MULTISPECIES: nicotinate phosphoribosyltransferase [Lysinibacillus]	450	458	1	1171.64	0.0136545	11.6542	2	16	0.125	145.983	0.00894461	2.00894	FALSE	TRUE	493	356	71.4482
F:\25-03-2022\20220324-TEST BROTH-POS-00.d	4203	scanId=2409403		40.1566	564.823	6043.67	2	1127.63	131	14419.2	K.QSLARALGGQK.T	QSLARALGGQK	WP_206701009.1 MULTISPECIES: o-succinylbenzoate synthase [Lysinibacillus]	106	116	1	1127.64	-0.00908664	-8.05809	2	20	0.1	127.425	0.00883718	2.00884	TRUE	FALSE	494	356	71.4482
F:\25-03-2022\20220324-TEST BROTH-POS-00.d	6255	scanId=3548201		59.1365	649.91	2830.45	2	1297.81	236	27152.9	K.KVSVTLPAIDKK.E	KVSVTLPAIDKK	WP_051563170.1 MULTISPECIES: S-layer protein [Lysinibacillus]	278	289	2	1297.8	0.0089242	6.87643	2	22	0.0909091	232.978	0.00858021	2.00858	TRUE	FALSE	495	356	71.4482
F:\25-03-2022\20220324-TEST BROTH-POS-00.d	4488	scanId=2553453		42.5574	586.834	3698.03	2	1171.65	101	8450.65	R.QQIKDQWVK.A	QQIKDQWVK	WP_012292240.1 MULTISPECIES: S9 family peptidase [Lysinibacillus]	67	75	1	1171.63	0.0190412	16.2518	2	16	0.125	72.2278	0.00854701	2.00855	TRUE	FALSE	496	356	71.4482
F:\25-03-2022\20220324-TEST BROTH-POS-00.d	4646	scanId=2632485		43.8746	672.408	11206.5	2	1342.8	206	19907.8	K.TRLAGLSAAVVSAK.D	TRLAGLSAAVVSAK	DECOY_WP_012295418.1 MULTISPECIES: aspartate--tRNA ligase [Lysinibacillus]	180	193	1	1342.79	0.00856232	6.3765	2	26	0.0769231	168.525	0.00846524	2.00847	FALSE	TRUE	496	357	71.6489
F:\25-03-2022\20220324-TEST BROTH-POS-00.d	4439	scanId=2528871		42.1477	587.339	4987.35	2	1172.66	125	15677.2	R.LVAGNPAYIQK.K	LVAGNPAYIQK	DECOY_WP_036161931.1 MULTISPECIES: polysaccharide deacetylase family protein [Lysinibacillus]	252	262	0	1172.66	0.00719597	6.13648	2	20	0.1	129.173	0.00823955	2.00824	FALSE	TRUE	496	358	71.8496
F:\25-03-2022\20220324-TEST BROTH-POS-00.d	4137	scanId=2376073		39.6011	412.748	2473.18	2	823.48	127	13028.6	K.TTAKYLK.R	TTAKYLK	DECOY_WP_012295422.1 MULTISPECIES: hypothetical protein [Lysinibacillus]	6	12	1	823.48	0.000135112	0.164074	2	12	0.166667	102.147	0.00784022	2.00784	FALSE	TRUE	496	359	72.0199
F:\25-03-2022\20220324-TEST BROTH-POS-00.d	4650	scanId=2634535		43.9088	628.382	9149.71	2	1254.75	169	18662.3	K.YKQFLTKTVK.N	YKQFLTKTVK	DECOY_WP_012293743.1 MULTISPECIES: endonuclease III [Lysinibacillus]	163	172	2	1254.73	0.0156052	12.4371	2	18	0.111111	144.446	0.00774003	2.00774	FALSE	TRUE	496	360	72.0199
F:\25-03-2022\20220324-TEST BROTH-POS-00.d	5651	scanId=3202993		53.3831	863.539	1242.94	2	1725.06	136	9356.21	K.GVIHAPRVIEIRPLR.A	GVIHAPRVIEIRPLR	DECOY_WP_036160356.1 MULTISPECIES: type III pantothenate kinase [Lysinibacillus]	75	89	1	1725.05	0.0102566	5.9457	2	28	0.0714286	71.9276	0.00768769	2.00769	FALSE	TRUE	496	361	72.0199
F:\25-03-2022\20220324-TEST BROTH-POS-00.d	3995	scanId=2301128		38.352	988.485	778.32	2	1974.96	73	4343.17	R.ELFQKEYETVFTANEK.W	ELFQKEYETVFTANEK	WP_036161804.1 MULTISPECIES: aconitate hydratase AcnA [Lysinibacillus]	613	628	1	1974.96	-0.00102963	-0.521345	2	30	0.0666667	33.1008	0.00762134	2.00762	TRUE	FALSE	497	361	72.0199
F:\25-03-2022\20220324-TEST BROTH-POS-00.d	4572	scanId=2594675		43.2445	628.383	20028.6	2	1254.75	226	24301	R.NAIRPTGRSRK.A	NAIRPTGRSRK	DECOY_WP_036162238.1 MULTISPECIES: Holliday junction branch migration DNA helicase RuvB [Lysinibacillus]	114	124	2	1254.73	0.0250292	19.9479	2	20	0.1	184.641	0.00759808	2.0076	FALSE	TRUE	497	362	72.0199
F:\25-03-2022\20220324-TEST BROTH-POS-00.d	4868	scanId=2748037		45.8005	760.459	3020.4	2	1518.9	107	8655.27	K.ARGYLLRM(oxidation of M)AALLR.L	ARGYLLRMAALLR	DECOY_WP_012291661.1 MULTISPECIES: S-4TM family putative pore-forming effector [Lysinibacillus]	266	278	2	1518.88	0.0211157	13.9021	2	24	0.0833333	64.9743	0.00750691	2.00751	FALSE	TRUE	497	363	72.0199
F:\25-03-2022\20220324-TEST BROTH-POS-00.d	4288	scanId=2454000		40.8999	540.33	7589.5	2	1078.65	149	16131.6	R.RAGLLHDIGK.A	RAGLLHDIGK	WP_012293332.1 MULTISPECIES: ribonuclease Y [Lysinibacillus]	362	371	1	1078.62	0.0213949	19.8354	2	18	0.111111	120.725	0.00748376	2.00748	TRUE	FALSE	498	363	72.0199
F:\25-03-2022\20220324-TEST BROTH-POS-00.d	5016	scanId=2829412		47.1567	806.961	2080.56	2	1611.91	85	5838.64	R.VLNSTGALSLQEVPGK.L	VLNSTGALSLQEVPGK	WP_012293096.1 MULTISPECIES: dihydrolipoyl dehydrogenase [Lysinibacillus]	163	178	0	1611.88	0.0251039	15.5743	2	30	0.0666667	43.1313	0.00738721	2.00739	TRUE	FALSE	499	363	72.0199
F:\25-03-2022\20220324-TEST BROTH-POS-00.d	6725	scanId=3818948		63.649	490.226	3701.01	2	978.437	188	19732.7	-.MNEDNTKK.Y	MNEDNTKK	DECOY_WP_012295941.1 MULTISPECIES: EamA family transporter [Lysinibacillus]	1	8	1	978.444	-0.00698892	-7.14289	2	14	0.142857	136.785	0.0069319	2.00693	FALSE	TRUE	499	364	72.0199
F:\25-03-2022\20220324-TEST BROTH-POS-00.d	4613	scanId=2615212		43.5867	491.795	3388.24	2	981.575	83	8367.97	R.KHLEKEAK.A	KHLEKEAK	WP_012295916.1 MULTISPECIES: BCCT family transporter [Lysinibacillus]	510	517	2	981.561	0.0143052	14.5739	2	14	0.142857	57.3878	0.00685804	2.00686	TRUE	FALSE	500	364	72.0199
F:\25-03-2022\20220324-TEST BROTH-POS-00.d	4869	scanId=2748369		45.806	718.913	4343.52	2	1435.81	137	11690.3	R.ISSLERTFAAITK.N	ISSLERTFAAITK	DECOY_WP_089985339.1 MULTISPECIES: ribosome recycling factor [Lysinibacillus]	160	172	1	1435.8	0.00893366	6.22207	2	24	0.0833333	77.379	0.00661905	2.00662	FALSE	TRUE	500	365	72.0199
F:\25-03-2022\20220324-TEST BROTH-POS-00.d	5598	scanId=3171625		52.8603	1300.17	583.645	2	2598.32	79	4591.65	R.LEFIETVQSFTDEDLTSIQIDR.S	LEFIETVQSFTDEDLTSIQIDR	WP_012294167.1 MULTISPECIES: DinB family protein [Lysinibacillus]	92	113	0	2598.27	0.0463852	17.8523	2	42	0.047619	29.1875	0.00635665	2.00636	TRUE	FALSE	501	365	72.0199
F:\25-03-2022\20220324-TEST BROTH-POS-00.d	4514	scanId=2566284		42.7713	606.371	25663.6	2	1210.73	186	19799.7	K.LVEQIRGTPAK.Y	LVEQIRGTPAK	DECOY_WP_206701061.1 MULTISPECIES: DNA polymerase III subunit gamma/tau [Lysinibacillus]	162	172	1	1210.7	0.0240502	19.8646	2	20	0.1	124.128	0.00626917	2.00627	FALSE	TRUE	501	366	72.0199
F:\25-03-2022\20220324-TEST BROTH-POS-00.d	3210	scanId=1847828		30.797	557.31	680.988	2	1112.6	111	29956.5	R.VEITGPVDRK.M	VEITGPVDRK	WP_031418044.1 MULTISPECIES: malate synthase A [Lysinibacillus]	90	99	1	1112.62	-0.0140008	-12.5836	2	18	0.111111	187.118	0.00624633	2.00625	TRUE	FALSE	502	366	72.0199
F:\25-03-2022\20220324-TEST BROTH-POS-00.d	6417	scanId=3641562		60.6926	748.968	6033.2	2	1495.92	295	32574.7	K.VVAIIQVNPRIFK.K	VVAIIQVNPRIFK	DECOY_WP_036162357.1 MULTISPECIES: alanine racemase [Lysinibacillus]	335	347	1	1495.92	-0.00272257	-1.81999	2	24	0.0833333	202.027	0.00620196	2.0062	FALSE	TRUE	502	367	72.0199
F:\25-03-2022\20220324-TEST BROTH-POS-00.d	4049	scanId=2330039		38.8338	738.382	1938.34	2	1474.75	187	38243.2	R.ERAAAEITQMIDK.E	ERAAAEITQMIDK	WP_024363204.1 MULTISPECIES: glutamyl-tRNA reductase [Lysinibacillus]	315	327	1	1474.74	0.00420123	2.84879	2	24	0.0833333	224.147	0.00586109	2.00586	TRUE	FALSE	503	367	72.0199
F:\25-03-2022\20220324-TEST BROTH-POS-00.d	3990	scanId=2298746		38.3123	498.78	1637.77	2	995.545	72	6611.64	K.IKRM(oxidation of M)FTGK.S	IKRMFTGK	WP_012296123.1 MULTISPECIES: RNA ligase family protein [Lysinibacillus]	151	158	2	995.559	-0.0135489	-13.6093	2	14	0.142857	38.5905	0.00583675	2.00584	TRUE	FALSE	504	367	72.0199
F:\25-03-2022\20220324-TEST BROTH-POS-00.d	4943	scanId=2789703		46.4949	738.448	14301.7	2	1474.88	202	20690.1	K.AVTLVPAHTSPVKR.S	AVTLVPAHTSPVKR	DECOY_WP_051563308.1 MULTISPECIES: amidohydrolase [Lysinibacillus]	155	168	1	1474.86	0.0203724	13.8131	2	26	0.0769231	114.537	0.00553582	2.00554	FALSE	TRUE	504	368	72.0199
F:\25-03-2022\20220324-TEST BROTH-POS-00.d	4991	scanId=2816281		46.9379	738.951	4899.68	2	1475.89	194	17349.8	R.FKRWVISNIVSK.T	FKRWVISNIVSK	WP_012293845.1 MULTISPECIES: oligoendopeptidase F [Lysinibacillus]	438	449	2	1475.86	0.0271423	18.3908	2	22	0.0909091	95.2796	0.00549169	2.00549	TRUE	FALSE	505	368	72.0199
F:\25-03-2022\20220324-TEST BROTH-POS-00.d	4483	scanId=2551071		42.5177	606.371	22005.4	2	1210.73	186	21431.6	R.GNSIKLLLPEK.L	GNSIKLLLPEK	DECOY_WP_012295744.1 MULTISPECIES: aminopeptidase [Lysinibacillus]	91	101	1	1210.73	-0.0018347	-1.51536	2	20	0.1	107.633	0.00502217	2.00502	FALSE	TRUE	505	369	72.0199
F:\25-03-2022\20220324-TEST BROTH-POS-00.d	6640	scanId=3770825		62.8469	609.378	4092.01	2	1216.74	275	29572.3	M.KKEFAVIGLGR.F	KKEFAVIGLGR	WP_031418843.1 MULTISPECIES: TrkA family potassium uptake protein [Lysinibacillus]	2	12	2	1216.73	0.0129284	10.6255	2	20	0.1	142.712	0.00482587	2.00483	TRUE	FALSE	506	369	72.0199
F:\25-03-2022\20220324-TEST BROTH-POS-00.d	6347	scanId=3603087		60.0513	704.945	4764.09	2	1407.88	296	27481.7	K.YLQYLKILARK.E	YLQYLKILARK	DECOY_WP_008180932.1 MULTISPECIES: RNA polymerase sporulation sigma factor SigK [Lysinibacillus]	10	20	2	1407.86	0.0158076	11.2281	2	20	0.1	126.327	0.00459677	2.0046	FALSE	TRUE	506	370	72.0199
F:\25-03-2022\20220324-TEST BROTH-POS-00.d	4841	scanId=2733926		45.5653	738.449	8602.93	2	1474.88	225	20294.5	M.VVTMRPLKIKYK.K	VVTMRPLKIKYK	WP_012292041.1 MULTISPECIES: serine protease [Lysinibacillus]	2	13	2	1474.91	-0.022906	-15.5305	2	22	0.0909091	93.1217	0.00458851	2.00459	TRUE	FALSE	507	370	72.0199
F:\25-03-2022\20220324-TEST BROTH-POS-00.d	6529	scanId=3707398		61.7898	826.017	4807.7	2	1650.02	258	26318.8	K.LVQLKVLILDGRQR.D	LVQLKVLILDGRQR	WP_031416589.1 MULTISPECIES: FosM family fosfomycin resistance protein [Lysinibacillus]	84	97	2	1650.03	-0.0106841	-6.4751	2	26	0.0769231	117.272	0.00445583	2.00446	TRUE	FALSE	508	370	72.0199
F:\25-03-2022\20220324-TEST BROTH-POS-00.d	4624	scanId=2620923		43.6819	628.383	17898	2	1254.75	181	20881.7	R.LEKKIIQDLR.E	LEKKIIQDLR	WP_025113851.1 MULTISPECIES: RNA polymerase sporulation sigma factor SigE [Lysinibacillus]	218	227	2	1254.77	-0.0152587	-12.1606	2	18	0.111111	93.0377	0.00445546	2.00446	TRUE	FALSE	509	370	72.0199
F:\25-03-2022\20220324-TEST BROTH-POS-00.d	4809	scanId=2716686		45.278	657.387	1797.39	2	1312.76	89	7178.55	R.GEKLAVIDAIER.Q	GEKLAVIDAIER	WP_012293922.1 MULTISPECIES: DUF1572 family protein [Lysinibacillus]	120	131	1	1312.74	0.0249007	18.9686	2	22	0.0909091	30.0929	0.00419206	2.00419	TRUE	FALSE	510	370	72.0199
F:\25-03-2022\20220324-TEST BROTH-POS-00.d	4375	scanId=2496707		41.6116	564.821	6692.21	2	1127.63	128	12962.9	R.LRHLDIFSK.K	LRHLDIFSK	DECOY_WP_139015317.1 MULTISPECIES: glycosyltransferase [Lysinibacillus]	158	166	1	1127.65	-0.0168339	-14.9284	2	16	0.125	52.1026	0.00401936	2.00402	FALSE	TRUE	510	371	72.0199
F:\25-03-2022\20220324-TEST BROTH-POS-00.d	6542	scanId=3714495		61.9081	837.021	3681.13	2	1672.03	251	24962.4	K.RLGQLGYKPIIRMK.H	RLGQLGYKPIIRMK	WP_036160542.1 MULTISPECIES: GNAT family N-acetyltransferase [Lysinibacillus]	518	531	2	1672	0.0307719	18.4043	2	26	0.0769231	98.9042	0.00396212	2.00396	TRUE	FALSE	511	371	72.0199
F:\25-03-2022\20220324-TEST BROTH-POS-00.d	6229	scanId=3533452		58.8907	627.897	8019.08	2	1253.78	312	31433.4	K.VREEIIARIR.R	VREEIIARIR	DECOY_WP_012291873.1 MULTISPECIES: ribonuclease M5 [Lysinibacillus]	118	127	2	1253.76	0.0232744	18.5637	2	18	0.111111	120.425	0.00383112	2.00383	FALSE	TRUE	511	372	72.0199
F:\25-03-2022\20220324-TEST BROTH-POS-00.d	4978	scanId=2808027		46.8003	782.973	3756.68	2	1563.93	161	14806.8	R.LHSININRQTKLK.L	LHSININRQTKLK	WP_012292787.1 MULTISPECIES: DUF5693 family protein [Lysinibacillus]	262	274	2	1563.92	0.0112551	7.1967	2	24	0.0833333	55.0173	0.00371568	2.00372	TRUE	FALSE	512	372	72.0199
F:\25-03-2022\20220324-TEST BROTH-POS-00.d	6619	scanId=3758406		62.64	892.055	2485.86	2	1782.1	204	19088.5	K.LMVAAGLVLVIC[carbamidomethylation of C]VIRR.W	LMVAAGLVLVICVIRR	DECOY_WP_012293440.1 MULTISPECIES: multidrug efflux SMR transporter [Lysinibacillus]	6	21	1	1782.07	0.0228053	12.7971	2	30	0.0666667	70.1316	0.00367403	2.00367	FALSE	TRUE	512	373	72.0199
F:\25-03-2022\20220324-TEST BROTH-POS-00.d	4831	scanId=2729163		45.4859	694.422	30433.1	2	1386.83	193	18882.8	M.SNIVLLISTTAQK.E	SNIVLLISTTAQK	WP_024363854.1 MULTISPECIES: ribonuclease HIII [Lysinibacillus]	2	14	0	1386.81	0.0221919	16.0021	2	24	0.0833333	68.6557	0.00363589	2.00364	TRUE	FALSE	513	373	72.0199
F:\25-03-2022\20220324-TEST BROTH-POS-00.d	4982	scanId=2810796		46.8465	740.926	3777.84	2	1479.84	118	9895.55	-.MFLKRLEVIGFK.S	MFLKRLEVIGFK	WP_012293240.1 MULTISPECIES: chromosome segregation protein SMC [Lysinibacillus]	1	12	2	1479.86	-0.0270593	-18.285	2	22	0.0909091	32.8631	0.003321	2.00332	TRUE	FALSE	514	373	72.0199
F:\25-03-2022\20220324-TEST BROTH-POS-00.d	6396	scanId=3629866		60.4976	737.96	2800.48	2	1473.91	232	21459.4	R.LLTMIM(oxidation of M)ILINRK.K	LLTMIMILINRK	WP_012292153.1 MULTISPECIES: YafY family transcriptional regulator [Lysinibacillus]	6	17	1	1473.88	0.0275626	18.7008	2	22	0.0909091	70.1361	0.00326832	2.00327	TRUE	FALSE	515	373	72.0199
F:\25-03-2022\20220324-TEST BROTH-POS-00.d	6827	scanId=3875898		64.5982	571.309	2034.51	2	1140.6	180	17090.7	K.AIFDIVNNVH.-	AIFDIVNNVH	DECOY_WP_206700921.1 MULTISPECIES: 2-oxoglutarate ferredoxin oxidoreductase subunit beta [Lysinibacillus]	116	125	0	1140.59	0.0112596	9.87173	2	18	0.111111	55.0789	0.00322274	2.00322	FALSE	TRUE	515	374	72.0199
F:\25-03-2022\20220324-TEST BROTH-POS-00.d	4873	scanId=2750419		45.8402	557.832	5767.34	2	1113.65	119	11932.9	R.KPLTRMGIAK.I	KPLTRMGIAK	WP_036162343.1 MULTISPECIES: amidohydrolase family protein [Lysinibacillus]	158	167	1	1113.67	-0.0193614	-17.3852	2	18	0.111111	38.1078	0.00319349	2.00319	TRUE	FALSE	516	374	72.0199
F:\25-03-2022\20220324-TEST BROTH-POS-00.d	4750	scanId=2686386		44.773	694.423	5243.8	2	1386.83	184	16215.4	R.IAIKLTSSNSIIK.T	IAIKLTSSNSIIK	DECOY_WP_054611615.1 MULTISPECIES: TetR/AcrR family transcriptional regulator [Lysinibacillus]	111	123	1	1386.84	-0.0139853	-10.0843	2	24	0.0833333	49.933	0.00307936	2.00308	FALSE	TRUE	516	375	72.0199
F:\25-03-2022\20220324-TEST BROTH-POS-00.d	4490	scanId=2554750		42.579	608.848	15865.8	2	1215.68	151	17154.5	R.C[carbamidomethylation of C]IDRIIAEVK.Q	CIDRIIAEVK	DECOY_WP_068983729.1 MULTISPECIES: histidine--tRNA ligase [Lysinibacillus]	391	400	1	1215.66	0.015994	13.1566	2	18	0.111111	52.363	0.00305243	2.00305	FALSE	TRUE	516	376	72.0199
F:\25-03-2022\20220324-TEST BROTH-POS-00.d	4776	scanId=2700600		45.0099	716.436	12957.6	2	1430.86	220	22630.3	K.ALAITLKSGYVPAK.I	ALAITLKSGYVPAK	DECOY_WP_012293318.1 MULTISPECIES: ribonuclease J [Lysinibacillus]	453	466	1	1430.85	0.00754789	5.27511	2	26	0.0769231	66.8762	0.00295517	2.00296	FALSE	TRUE	516	377	72.0199
F:\25-03-2022\20220324-TEST BROTH-POS-00.d	4551	scanId=2584934		43.0821	633.338	2288.19	2	1264.66	81	6990.1	R.IVM(oxidation of M)AKEFFHK.K	IVMAKEFFHK	WP_036161906.1 MULTISPECIES: Rrf2 family transcriptional regulator [Lysinibacillus]	154	163	1	1264.66	-0.00208006	-1.64475	2	18	0.111111	19.0179	0.00272069	2.00272	TRUE	FALSE	517	377	72.0199
F:\25-03-2022\20220324-TEST BROTH-POS-00.d	4470	scanId=2544108		42.4017	584.86	4961.9	2	1167.71	180	17977.9	K.TLRGIAEALPK.S	TLRGIAEALPK	WP_012295715.1 MULTISPECIES: asparagine synthase (glutamine-hydrolyzing) [Lysinibacillus]	392	402	1	1167.7	0.00796279	6.81923	2	20	0.1	47.4358	0.00263856	2.00264	TRUE	FALSE	518	377	72.0199
F:\25-03-2022\20220324-TEST BROTH-POS-00.d	3434	scanId=1980190		33.003	600.836	876.495	2	1199.66	206	82755.2	K.ETLLEIGRNR.T	ETLLEIGRNR	WP_012291836.1 MULTISPECIES: patatin-like phospholipase family protein [Lysinibacillus]	275	284	1	1199.66	-0.00568257	-4.73681	2	18	0.111111	211.114	0.00255106	2.00255	TRUE	FALSE	519	377	72.0199
F:\25-03-2022\20220324-TEST BROTH-POS-00.d	6728	scanId=3820833		63.6804	659.417	3545.77	2	1316.82	321	34372.4	R.KLVDRVLLPHK.S	KLVDRVLLPHK	DECOY_WP_012293877.1 MULTISPECIES: PucR family transcriptional regulator [Lysinibacillus]	534	544	2	1316.83	-0.00999	-7.58641	2	20	0.1	84.7788	0.00246648	2.00247	FALSE	TRUE	519	378	72.0199
F:\25-03-2022\20220324-TEST BROTH-POS-00.d	4263	scanId=2441546		40.6923	443.273	16475.3	2	884.532	130	11947.6	K.HIGKRFK.L	HIGKRFK	WP_036162758.1 MULTISPECIES: bile acid:sodium symporter [Lysinibacillus]	249	255	2	884.534	-0.00290378	-3.28284	2	12	0.166667	27.7862	0.00232567	2.00233	TRUE	FALSE	520	378	72.0199
F:\25-03-2022\20220324-TEST BROTH-POS-00.d	5480	scanId=3104437		51.7405	777.964	2956.59	2	1553.91	112	9262.52	K.REKVQGVGTVNVLR.Y	REKVQGVGTVNVLR	WP_012293220.1 MULTISPECIES: M20/M25/M40 family metallo-hydrolase [Lysinibacillus]	339	352	2	1553.9	0.01353	8.70709	2	26	0.0769231	20.4881	0.00221194	2.00221	TRUE	FALSE	521	378	72.0199
F:\25-03-2022\20220324-TEST BROTH-POS-00.d	4431	scanId=2524637		42.0772	628.383	2972	2	1254.75	143	11170.8	K.GSYKKIFALTK.G	GSYKKIFALTK	DECOY_WP_031415857.1 MULTISPECIES: alpha/beta hydrolase [Lysinibacillus]	3	13	2	1254.73	0.018064	14.3967	2	20	0.1	22.0541	0.00197428	2.00197	FALSE	TRUE	521	379	72.0199
F:\25-03-2022\20220324-TEST BROTH-POS-00.d	6190	scanId=3512110		58.535	616.893	12806.4	2	1231.77	350	40263.7	R.KLYIKAGALQK.T	KLYIKAGALQK	DECOY_WP_031418434.1 MULTISPECIES: tryptophan synthase subunit beta [Lysinibacillus]	310	320	2	1231.77	0.00590774	4.79616	2	20	0.1	76.878	0.00190936	2.00191	FALSE	TRUE	521	380	72.0199
F:\25-03-2022\20220324-TEST BROTH-POS-00.d	4287	scanId=2453668		40.8943	584.357	8586.2	2	1166.7	192	20588	K.RSIGAPARALR.N	RSIGAPARALR	WP_031418882.1 MULTISPECIES: nitronate monooxygenase family protein [Lysinibacillus]	231	241	2	1166.7	-0.000241816	-0.207265	2	20	0.1	35.3655	0.00171777	2.00172	TRUE	FALSE	522	380	72.0199
F:\25-03-2022\20220324-TEST BROTH-POS-00.d	6753	scanId=3835248		63.9207	666.92	3399.26	2	1331.83	222	21153.3	K.TFLAILQRSRK.R	TFLAILQRSRK	DECOY_WP_012295215.1 MULTISPECIES: Nif11 family protein [Lysinibacillus]	3	13	2	1331.8	0.0225346	16.9203	2	20	0.1	30.3902	0.00143666	2.00144	FALSE	TRUE	522	381	72.0199
F:\25-03-2022\20220324-TEST BROTH-POS-00.d	4770	scanId=2697318		44.9552	716.938	6255.37	2	1431.86	224	20958.9	R.VFSRITLIVEKK.R	VFSRITLIVEKK	WP_012295792.1 MULTISPECIES: PH domain-containing protein [Lysinibacillus]	426	437	2	1431.88	-0.0200388	-13.9947	2	22	0.0909091	27.7202	0.0013226	2.00132	TRUE	FALSE	523	381	72.0199
F:\25-03-2022\20220324-TEST BROTH-POS-00.d	4361	scanId=2490725		41.5119	465.787	12512.9	2	929.56	216	26056.3	K.KRLADLSK.K	KRLADLSK	WP_031418899.1 MULTISPECIES: UDP-N-acetylmuramoyl-L-alanyl-D-glutamate--2,6-diaminopimelate ligase [Lysinibacillus]	226	233	2	929.566	-0.00540901	-5.81886	2	14	0.142857	30.942	0.0011875	2.00119	TRUE	FALSE	524	381	72.0199
F:\25-03-2022\20220324-TEST BROTH-POS-00.d	4435	scanId=2526655		42.1108	633.339	2278.44	2	1264.66	57	5734.87	R.LC[carbamidomethylation of C]VFLGEKATK.M	LCVFLGEKATK	WP_054550251.1 MULTISPECIES: transcriptional regulator YeiL [Lysinibacillus]	126	136	1	1264.68	-0.0218724	-17.2947	1	20	0.05	2060.25	0.35925	1.35925	TRUE	FALSE	525	381	72.0199
F:\25-03-2022\20220324-TEST BROTH-POS-00.d	4579	scanId=2598353		43.3058	633.337	8648.49	2	1264.66	75	12220.1	R.LC[carbamidomethylation of C]VFLGEKATK.M	LCVFLGEKATK	WP_054550251.1 MULTISPECIES: transcriptional regulator YeiL [Lysinibacillus]	126	136	1	1264.68	-0.0248618	-19.6585	1	20	0.05	4153.82	0.339916	1.33992	TRUE	FALSE	526	381	72.0199
F:\25-03-2022\20220324-TEST BROTH-POS-00.d	1956	scanId=1103467		18.391	407.218	1098.95	2	812.422	31	2958.38	K.HRIEMK.S	HRIEMK	DECOY_WP_012293228.1 MULTISPECIES: AbgT family transporter [Lysinibacillus]	213	218	1	812.433	-0.011042	-13.5913	1	10	0.1	651.998	0.22039	1.22039	FALSE	TRUE	526	382	72.0199
F:\25-03-2022\20220324-TEST BROTH-POS-00.d	3023	scanId=1736691		28.9447	617.321	1022.25	2	1232.63	38	2858.97	R.KC[carbamidomethylation of C]VATGEMLPK.K	KCVATGEMLPK	WP_012293303.1 MULTISPECIES: YlxR family protein [Lysinibacillus]	11	21	1	1232.63	0.00176804	1.43437	1	20	0.05	616.365	0.215589	1.21559	TRUE	FALSE	527	382	72.0199
F:\25-03-2022\20220324-TEST BROTH-POS-00.d	3880	scanId=2238272		37.3044	457.234	2372.44	2	912.454	58	6525.41	K.VVEEFYK.D	VVEEFYK	WP_016994084.1 MULTISPECIES: type I DNA topoisomerase [Lysinibacillus]	547	553	0	912.459	-0.00544981	-5.97266	1	12	0.0833333	1400.93	0.214688	1.21469	TRUE	FALSE	528	382	72.0199
F:\25-03-2022\20220324-TEST BROTH-POS-00.d	3814	scanId=2200555		36.6758	435.227	1202.47	2	868.439	48	4568.3	K.YGTIM(oxidation of M)IR.T	YGTIMIR	DECOY_WP_036160636.1 MULTISPECIES: DUF1273 domain-containing protein [Lysinibacillus]	176	182	0	868.448	-0.00906381	-10.4368	1	12	0.0833333	894.597	0.195827	1.19583	FALSE	TRUE	528	383	72.0397
F:\25-03-2022\20220324-TEST BROTH-POS-00.d	4606	scanId=2611478		43.5245	631.363	7243.68	2	1260.71	155	18654.1	K.EYLRAKGVAVR.-	EYLRAKGVAVR	WP_012292227.1 MULTISPECIES: imidazole glycerol phosphate synthase subunit HisF [Lysinibacillus]	243	253	2	1260.73	-0.017904	-14.2013	1	20	0.05	3512.56	0.1883	1.1883	TRUE	FALSE	529	383	72.0397
F:\25-03-2022\20220324-TEST BROTH-POS-00.d	3707	scanId=2140459		35.6742	435.225	1292.51	2	868.435	45	5202.99	K.YGTIM(oxidation of M)IR.T	YGTIMIR	DECOY_WP_036160636.1 MULTISPECIES: DUF1273 domain-containing protein [Lysinibacillus]	176	182	0	868.448	-0.0127574	-14.6899	1	12	0.0833333	929.01	0.178553	1.17855	FALSE	TRUE	529	384	72.0397
F:\25-03-2022\20220324-TEST BROTH-POS-00.d	1115	scanId=608387		10.1396	730.411	491.391	2	1458.81	18	1368.81	R.LM(oxidation of M)IEARKGVSLAR.W	LMIEARKGVSLAR	DECOY_WP_012293679.1 MULTISPECIES: CoA-acylating methylmalonate-semialdehyde dehydrogenase [Lysinibacillus]	432	444	2	1458.83	-0.0269636	-18.483	1	24	0.0416667	230.651	0.168505	1.1685	FALSE	TRUE	529	385	72.0397
F:\25-03-2022\20220324-TEST BROTH-POS-00.d	3020	scanId=1734807		28.9133	293.135	1502.07	2	584.254	56	7184.43	R.M(oxidation of M)FSGK.F	MFSGK	WP_036220157.1 MULTISPECIES: tail fiber protein [Lysinibacillus]	11	15	0	584.263	-0.00833822	-14.2714	1	8	0.125	1185.42	0.164998	1.165	TRUE	FALSE	530	385	72.0397
F:\25-03-2022\20220324-TEST BROTH-POS-00.d	2471	scanId=1413989		23.5663	715.85	587.533	2	1429.68	26	1532.01	R.MHSQLPM(oxidation of M)SVKEK.G	MHSQLPMSVKEK	WP_103118646.1 MULTISPECIES: dephospho-CoA kinase [Lysinibacillus]	157	168	1	1429.71	-0.0208377	-14.5748	1	22	0.0454545	250.1	0.16325	1.16325	TRUE	FALSE	531	385	72.0397
F:\25-03-2022\20220324-TEST BROTH-POS-00.d	1339	scanId=738584		12.3096	395.206	701.099	2	788.397	24	1515.35	K.AAEELEK.E	AAEELEK	WP_012293094.1 MULTISPECIES: alpha-ketoacid dehydrogenase subunit beta [Lysinibacillus]	220	226	0	788.392	0.00559772	7.10017	1	12	0.0833333	231.066	0.152484	1.15248	TRUE	FALSE	532	385	72.0397
F:\25-03-2022\20220324-TEST BROTH-POS-00.d	4800	scanId=2712344		45.2056	704.888	1283.96	2	1407.76	71	5486.36	-.MKSNLKSVYNPK.N	MKSNLKSVYNPK	DECOY_WP_031416107.1 MULTISPECIES: bifunctional UDP-N-acetylglucosamine diphosphorylase/glucosamine-1-phosphate N-acetyltransferase GlmU [Lysinibacillus]	1	12	2	1407.75	0.00798581	5.67273	1	22	0.0454545	827.488	0.150826	1.15083	FALSE	TRUE	532	386	72.0913
F:\25-03-2022\20220324-TEST BROTH-POS-00.d	3739	scanId=2158792		35.9797	457.244	1126.57	2	912.474	56	4654.46	K.VVEEFYK.D	VVEEFYK	WP_016994084.1 MULTISPECIES: type I DNA topoisomerase [Lysinibacillus]	547	553	0	912.459	0.0146632	16.07	1	12	0.0833333	697.096	0.149769	1.14977	TRUE	FALSE	533	386	72.0913
F:\25-03-2022\20220324-TEST BROTH-POS-00.d	3184	scanId=1832311		30.5384	530.788	1283.45	2	1059.56	52	4680.06	R.LTMNAIVGNK.G	LTMNAIVGNK	DECOY_WP_206701040.1 MULTISPECIES: glycerophosphodiester phosphodiesterase [Lysinibacillus]	184	193	0	1059.57	-0.0126596	-11.9478	1	18	0.0555556	694.807	0.148461	1.14846	FALSE	TRUE	533	387	72.1034
F:\25-03-2022\20220324-TEST BROTH-POS-00.d	3834	scanId=2211136		36.8521	657.365	584.364	2	1312.72	26	1892.21	K.MEVKDGPLGIVR.K	MEVKDGPLGIVR	DECOY_WP_031417085.1 MULTISPECIES: signal peptidase I [Lysinibacillus]	94	105	1	1312.72	-0.00114996	-0.876014	1	22	0.0454545	251.121	0.132713	1.13271	FALSE	TRUE	533	388	72.1034
F:\25-03-2022\20220324-TEST BROTH-POS-00.d	1527	scanId=849209		14.1533	323.181	738.794	2	644.348	34	2530.35	R.EVLER.V	EVLER	DECOY_WP_012293225.1 MULTISPECIES: L-serine ammonia-lyase, iron-sulfur-dependent, subunit alpha [Lysinibacillus]	291	295	0	644.349	-0.0016529	-2.56522	1	8	0.125	328.903	0.129983	1.12998	FALSE	TRUE	533	389	72.1034
F:\25-03-2022\20220324-TEST BROTH-POS-00.d	1282	scanId=706043		11.7673	644.346	394.557	2	1286.68	27	2066.33	K.GEKLVIPMNMR.D	GEKLVIPMNMR	WP_036221872.1 MULTISPECIES: RNA-splicing ligase RtcB [Lysinibacillus]	293	303	1	1286.68	-0.00671716	-5.22052	1	20	0.05	266.782	0.129109	1.12911	TRUE	FALSE	534	389	72.1034
F:\25-03-2022\20220324-TEST BROTH-POS-00.d	1653	scanId=924249		15.404	344.228	919.708	2	686.441	34	3161.85	R.KTPLTK.G	KTPLTK	WP_036162408.1 MULTISPECIES: DUF2238 domain-containing protein [Lysinibacillus]	122	127	1	686.433	0.00847504	12.3465	1	10	0.1	383.671	0.121344	1.12134	TRUE	FALSE	535	389	72.1034
F:\25-03-2022\20220324-TEST BROTH-POS-00.d	4444	scanId=2531254		42.1874	638.848	1359.7	2	1275.68	77	6962.93	R.VPALTPGVTHER.G	VPALTPGVTHER	WP_012295775.1 MULTISPECIES: cysteine desulfurase [Lysinibacillus]	211	222	0	1275.69	-0.0127523	-9.99636	1	22	0.0454545	841.912	0.120914	1.12091	TRUE	FALSE	536	389	72.1034
F:\25-03-2022\20220324-TEST BROTH-POS-00.d	2200	scanId=1250050		20.834	535.798	1001.95	2	1069.58	55	4809.38	K.KKDYIFEK.M	KKDYIFEK	DECOY_WP_036160980.1 MULTISPECIES: glycerol-3-phosphate dehydrogenase/oxidase [Lysinibacillus]	349	356	2	1069.58	0.000961078	0.898556	1	14	0.0714286	575.04	0.119566	1.11957	FALSE	TRUE	536	390	72.1034
F:\25-03-2022\20220324-TEST BROTH-POS-00.d	2604	scanId=1488671		24.8111	572.811	847.743	2	1143.61	37	2479.87	K.SPQPLQTFVK.K	SPQPLQTFVK	WP_036161240.1 MULTISPECIES: AraC family transcriptional regulator [Lysinibacillus]	104	113	0	1143.63	-0.0218854	-19.1368	1	18	0.0555556	285.441	0.115103	1.1151	TRUE	FALSE	537	390	72.1034
F:\25-03-2022\20220324-TEST BROTH-POS-00.d	2958	scanId=1697031		28.2837	544.79	814.912	2	1087.57	64	5446.76	K.KYFC[carbamidomethylation of C]VIMK.K	KYFCVIMK	DECOY_WP_012293542.1 MULTISPECIES: acyltransferase [Lysinibacillus]	293	300	1	1087.56	0.00927676	8.52992	1	14	0.0714286	616.191	0.11313	1.11313	FALSE	TRUE	537	391	72.1034
F:\25-03-2022\20220324-TEST BROTH-POS-00.d	1931	scanId=1089502		18.1582	452.74	664.406	2	903.466	35	2039.37	R.AHVM(oxidation of M)FKR.D	AHVMFKR	WP_031418679.1 MULTISPECIES: accessory Sec system translocase SecA2 [Lysinibacillus]	297	303	1	903.475	-0.00933167	-10.3286	1	12	0.0833333	229.21	0.112392	1.11239	TRUE	FALSE	538	391	72.1034
F:\25-03-2022\20220324-TEST BROTH-POS-00.d	2510	scanId=1436037		23.9338	532.258	573.538	2	1062.5	41	2941.14	K.GDATPSGTMVK.G	GDATPSGTMVK	DECOY_WP_012292998.1 MULTISPECIES: NEAT domain-containing protein [Lysinibacillus]	30	40	0	1062.5	0.000507493	0.477639	1	20	0.05	330.092	0.112233	1.11223	FALSE	TRUE	538	392	72.1034
F:\25-03-2022\20220324-TEST BROTH-POS-00.d	4657	scanId=2637582		43.9596	633.354	1829.76	2	1264.69	74	6023.85	R.LC[carbamidomethylation of C]VFLGEKATK.M	LCVFLGEKATK	WP_054550251.1 MULTISPECIES: transcriptional regulator YeiL [Lysinibacillus]	126	136	1	1264.68	0.00751137	5.93932	1	20	0.05	675.698	0.11217	1.11217	TRUE	FALSE	539	392	72.1034
F:\25-03-2022\20220324-TEST BROTH-POS-00.d	3763	scanId=2171590		36.193	457.231	1828.75	2	912.448	43	3445.57	K.VVEEFYK.D	VVEEFYK	WP_016994084.1 MULTISPECIES: type I DNA topoisomerase [Lysinibacillus]	547	553	0	912.459	-0.0110136	-12.0702	1	12	0.0833333	385.198	0.111795	1.1118	TRUE	FALSE	540	392	72.1034
F:\25-03-2022\20220324-TEST BROTH-POS-00.d	2502	scanId=1431053		23.8508	508.772	565.142	2	1015.53	45	4291.5	K.TFFIGYLR.Y	TFFIGYLR	DECOY_WP_031418550.1 MULTISPECIES: carbon starvation protein A [Lysinibacillus]	573	580	0	1015.55	-0.0202203	-19.9107	1	14	0.0714286	479.273	0.11168	1.11168	FALSE	TRUE	540	393	72.1034
F:\25-03-2022\20220324-TEST BROTH-POS-00.d	3098	scanId=1780798		29.6798	818.395	540.084	2	1634.77	41	2515.14	K.ETSFHNVSLEM(oxidation of M)LGR.E	ETSFHNVSLEMLGR	DECOY_WP_036161104.1 MULTISPECIES: CamS family sex pheromone protein [Lysinibacillus]	291	304	0	1634.77	0.00219764	1.34431	1	26	0.0384615	273.452	0.108722	1.10872	FALSE	TRUE	540	394	72.1034
F:\25-03-2022\20220324-TEST BROTH-POS-00.d	2596	scanId=1484072		24.7344	857.958	373.682	2	1713.9	19	1659.51	R.LDSVEQLAEQLQVSR.S	LDSVEQLAEQLQVSR	WP_231595554.1 MULTISPECIES: FadR family transcriptional regulator [Lysinibacillus]	16	30	0	1713.89	0.0108419	6.32589	1	28	0.0357143	179.648	0.108253	1.10825	TRUE	FALSE	541	394	72.1034
F:\25-03-2022\20220324-TEST BROTH-POS-00.d	1530	scanId=851093		14.1847	525.276	447.502	2	1048.54	17	1341.68	R.AVTQEYPNK.D	AVTQEYPNK	DECOY_WP_012292024.1 MULTISPECIES: DNA helicase PcrA [Lysinibacillus]	574	582	0	1048.52	0.0188542	17.9817	1	16	0.0625	141.707	0.105619	1.10562	FALSE	TRUE	541	395	72.1034
F:\25-03-2022\20220324-TEST BROTH-POS-00.d	4238	scanId=2428290		40.4714	445.749	3509.54	2	889.484	106	11037.2	R.SLLEATEK.E	SLLEATEK	WP_012295328.1 nucleotide exchange factor GrpE [Lysinibacillus fusiformis]	130	137	0	889.476	0.00838392	9.42569	1	14	0.0714286	1152.96	0.104461	1.10446	TRUE	FALSE	542	395	72.1034
F:\25-03-2022\20220324-TEST BROTH-POS-00.d	5081	scanId=2866049		47.7674	784.953	3781.77	2	1567.89	95	7797.77	K.VTIKESEQPIRLR.K	VTIKESEQPIRLR	WP_031419072.1 MULTISPECIES: (2Fe-2S)-binding protein [Lysinibacillus]	217	229	2	1567.9	-0.013357	-8.51901	1	24	0.0416667	805.029	0.103238	1.10324	TRUE	FALSE	543	395	72.1034
F:\25-03-2022\20220324-TEST BROTH-POS-00.d	2710	scanId=1552770		25.8794	434.253	891.142	2	866.492	36	2620.26	R.VHSLAGKR.R	VHSLAGKR	DECOY_WP_036161172.1 MULTISPECIES: thiolase family protein [Lysinibacillus]	360	367	1	866.509	-0.0167186	-19.2942	1	14	0.0714286	268.847	0.102603	1.1026	FALSE	TRUE	543	396	72.1034
F:\25-03-2022\20220324-TEST BROTH-POS-00.d	1771	scanId=996067		16.601	610.806	613.449	2	1219.6	30	2275.21	K.NWSVGNRM(oxidation of M)LK.V	NWSVGNRMLK	DECOY_WP_031419624.1 MULTISPECIES: glucosaminidase domain-containing protein [Lysinibacillus]	104	113	1	1219.61	-0.0166739	-13.6715	1	18	0.0555556	232.971	0.102396	1.1024	FALSE	TRUE	543	397	72.1034
F:\25-03-2022\20220324-TEST BROTH-POS-00.d	1391	scanId=768011		12.8001	314.693	1141.26	2	627.371	49	5496.96	R.TVGPVR.Q	TVGPVR	WP_012295327.1 MULTISPECIES: molecular chaperone DnaK [Lysinibacillus]	286	291	0	627.37	0.000927393	1.47822	1	10	0.1	549.373	0.0999413	1.09994	TRUE	FALSE	544	397	72.1034
F:\25-03-2022\20220324-TEST BROTH-POS-00.d	1412	scanId=779657		12.9941	481.259	373.186	2	960.503	28	2118.7	K.DSEITIAGR.L	DSEITIAGR	DECOY_WP_012293645.1 MULTISPECIES: chorismate mutase [Lysinibacillus]	110	118	0	960.488	0.0156906	16.3361	1	16	0.0625	210.248	0.0992344	1.09923	FALSE	TRUE	544	398	72.1034
F:\25-03-2022\20220324-TEST BROTH-POS-00.d	2630	scanId=1505731		25.0954	583.298	552.296	2	1164.58	26	1711.69	R.EVEEVLYER.E	EVEEVLYER	WP_031419385.1 MULTISPECIES: AMP-binding protein [Lysinibacillus]	469	477	0	1164.57	0.0159971	13.7366	1	16	0.0625	168.185	0.0982565	1.09826	TRUE	FALSE	545	398	72.1034
F:\25-03-2022\20220324-TEST BROTH-POS-00.d	1741	scanId=977728		16.2953	549.758	357.341	2	1097.5	25	1776.38	K.M(oxidation of M)WNRFSNK.N	MWNRFSNK	DECOY_WP_012293911.1 MULTISPECIES: LutB/LldF family L-lactate oxidation iron-sulfur protein [Lysinibacillus]	12	19	1	1097.51	-0.00629225	-5.73322	1	14	0.0714286	173.637	0.0977477	1.09775	FALSE	TRUE	545	399	72.1034
F:\25-03-2022\20220324-TEST BROTH-POS-00.d	3633	scanId=2098359		34.9725	492.282	1210.73	2	982.55	44	4365.75	R.QVVPGDQLK.L	QVVPGDQLK	WP_031418516.1 MULTISPECIES: 3-hydroxyacyl-ACP dehydratase FabZ [Lysinibacillus]	96	104	0	982.545	0.00492478	5.01228	1	16	0.0625	421.726	0.0965988	1.0966	TRUE	FALSE	546	399	72.1034
F:\25-03-2022\20220324-TEST BROTH-POS-00.d	1777	scanId=999668		16.661	408.742	1181.5	2	815.469	31	1707.17	K.LVAEVASK.T	LVAEVASK	WP_126659346.1 MULTISPECIES: chaperonin GroEL [Lysinibacillus]	72	79	0	815.475	-0.00608258	-7.45894	1	14	0.0714286	163.098	0.095537	1.09554	TRUE	FALSE	547	399	72.1034
F:\25-03-2022\20220324-TEST BROTH-POS-00.d	2780	scanId=1593156		26.5525	660.377	930.9	2	1318.74	38	3200.57	K.QQKKM(oxidation of M)FPVVAK.T	QQKKMFPVVAK	DECOY_WP_012293869.1 MULTISPECIES: glucose 1-dehydrogenase [Lysinibacillus]	123	133	2	1318.74	-0.00426068	-3.23087	1	20	0.05	305.206	0.0953601	1.09536	FALSE	TRUE	547	400	72.1034
F:\25-03-2022\20220324-TEST BROTH-POS-00.d	3234	scanId=1862233		31.0371	1076.97	1095.33	2	2151.94	54	3047.95	K.ITLAC[carbamidomethylation of C]MQEM(oxidation of M)EFM(oxidation of M)M(oxidation of M)LKTK.Y	ITLACMQEMEFMMLKTK	WP_036162603.1 MULTISPECIES: PolC-type DNA polymerase III [Lysinibacillus]	128	144	1	2151.97	-0.0393043	-18.2643	1	32	0.03125	287.464	0.094314	1.09431	TRUE	FALSE	548	400	72.1034
F:\25-03-2022\20220324-TEST BROTH-POS-00.d	5218	scanId=2949220		49.1535	667.899	3387.29	2	1333.78	97	9740.77	K.GLSPTLTQPPVPK.I	GLSPTLTQPPVPK	WP_012295274.1 MULTISPECIES: DNA (cytosine-5-)-methyltransferase [Lysinibacillus]	261	273	0	1333.76	0.0227981	17.0931	1	24	0.0416667	912.207	0.0936484	1.09365	TRUE	FALSE	549	400	72.1034
F:\25-03-2022\20220324-TEST BROTH-POS-00.d	4280	scanId=2450077		40.8345	723.391	1632.96	2	1444.77	85	6401.68	K.VQLLETVRTNWS.-	VQLLETVRTNWS	DECOY_WP_031418882.1 MULTISPECIES: nitronate monooxygenase family protein [Lysinibacillus]	308	319	1	1444.77	0.000829723	0.574295	1	22	0.0454545	599.412	0.0936336	1.09363	FALSE	TRUE	549	401	72.1034
F:\25-03-2022\20220324-TEST BROTH-POS-00.d	2411	scanId=1377042		22.9506	624.818	409.461	2	1247.62	29	2160.24	R.TGATASVRETQK.I	TGATASVRETQK	WP_031416242.1 MULTISPECIES: acetolactate synthase small subunit [Lysinibacillus]	150	161	1	1247.65	-0.024638	-19.7476	1	22	0.0454545	199.283	0.0922507	1.09225	TRUE	FALSE	550	401	72.1034
F:\25-03-2022\20220324-TEST BROTH-POS-00.d	2382	scanId=1360527		22.6753	602.342	469.753	2	1202.67	32	2542.25	K.AAIRWHFFR.M	AAIRWHFFR	DECOY_WP_036160453.1 MULTISPECIES: metal-dependent hydrolase [Lysinibacillus]	119	127	1	1202.65	0.023561	19.5909	1	16	0.0625	234.333	0.0921756	1.09218	FALSE	TRUE	550	402	72.1034
F:\25-03-2022\20220324-TEST BROTH-POS-00.d	3042	scanId=1748328		29.1387	422.764	1016.02	2	843.514	44	3580.23	R.TWILRR.K	TWILRR	WP_012293962.1 MULTISPECIES: PepSY domain-containing protein [Lysinibacillus]	386	391	1	843.508	0.00570613	6.76476	1	10	0.1	327.016	0.0913393	1.09134	TRUE	FALSE	551	402	72.1034
F:\25-03-2022\20220324-TEST BROTH-POS-00.d	564	scanId=303383		5.05625	689.354	496.136	2	1376.69	18	914.789	K.GTNGAM(oxidation of M)TVLAIADK.G	GTNGAMTVLAIADK	WP_012292740.1 MULTISPECIES: class II fructose-bisphosphatase [Lysinibacillus]	97	110	0	1376.7	-0.00399649	-2.90296	1	26	0.0384615	83.4556	0.0912294	1.09123	TRUE	FALSE	552	402	72.1034
F:\25-03-2022\20220324-TEST BROTH-POS-00.d	5166	scanId=2917563		48.6259	653.868	1683.7	2	1305.72	68	4933.99	K.IINWENVYKK.S	IINWENVYKK	WP_075807287.1 MULTISPECIES: zinc-ribbon domain-containing protein [Lysinibacillus]	341	350	1	1305.71	0.0137643	10.5417	1	18	0.0555556	447.453	0.0906879	1.09069	TRUE	FALSE	553	402	72.1034
F:\25-03-2022\20220324-TEST BROTH-POS-00.d	1694	scanId=949187		15.8196	515.284	354.429	2	1028.55	23	1723.01	K.VGARIEAGEK.K	VGARIEAGEK	WP_126658149.1 MULTISPECIES: cysteine--tRNA ligase [Lysinibacillus]	165	174	1	1028.56	-0.00779646	-7.57997	1	18	0.0555556	154.219	0.0895057	1.08951	TRUE	FALSE	554	402	72.1034
F:\25-03-2022\20220324-TEST BROTH-POS-00.d	4621	scanId=2619310		43.655	638.848	1837.64	2	1275.68	74	7048.23	R.VPALTPGVTHER.G	VPALTPGVTHER	WP_012295775.1 MULTISPECIES: cysteine desulfurase [Lysinibacillus]	211	222	0	1275.69	-0.0130166	-10.2035	1	22	0.0454545	623.726	0.088494	1.08849	TRUE	FALSE	555	402	72.1034
F:\25-03-2022\20220324-TEST BROTH-POS-00.d	2918	scanId=1674262		27.9042	617.825	644.446	2	1233.64	26	2297.52	R.MLIQAISMTAR.E	MLIQAISMTAR	DECOY_WP_012293877.1 MULTISPECIES: PucR family transcriptional regulator [Lysinibacillus]	285	295	0	1233.66	-0.0214119	-17.3564	1	20	0.05	202.655	0.0882061	1.08821	FALSE	TRUE	555	403	72.2828
F:\25-03-2022\20220324-TEST BROTH-POS-00.d	2532	scanId=1448118		24.1352	727.867	327.654	2	1453.72	25	1518.24	R.RIGDERSFDTMK.F	RIGDERSFDTMK	DECOY_WP_036162247.1 MULTISPECIES: GTPase ObgE [Lysinibacillus]	39	50	2	1453.7	0.0218773	15.0494	1	22	0.0454545	133.037	0.087626	1.08763	FALSE	TRUE	555	404	72.3318
F:\25-03-2022\20220324-TEST BROTH-POS-00.d	2581	scanId=1475705		24.595	693.377	543.115	2	1384.74	34	2082.48	R.GNTEFIRHGARK.A	GNTEFIRHGARK	WP_206701054.1 MULTISPECIES: DNA repair protein RecN [Lysinibacillus]	35	46	2	1384.73	0.00617167	4.45694	1	22	0.0454545	179.361	0.0861285	1.08613	TRUE	FALSE	556	404	72.3318
F:\25-03-2022\20220324-TEST BROTH-POS-00.d	2008	scanId=1134659		18.9108	533.27	758.633	2	1064.52	30	2093.1	K.TTFLPEMAR.S	TTFLPEMAR	DECOY_WP_010858646.1 MULTISPECIES: anti-sigma F factor [Lysinibacillus]	49	57	0	1064.53	-0.00777901	-7.30744	1	16	0.0625	180.029	0.0860106	1.08601	FALSE	TRUE	556	405	72.3343
F:\25-03-2022\20220324-TEST BROTH-POS-00.d	1168	scanId=639583		10.6596	408.734	1397.87	2	815.453	60	4394.76	K.KDGVIER.I	KDGVIER	DECOY_WP_012292001.1 MULTISPECIES: glutamine-hydrolyzing GMP synthase [Lysinibacillus]	296	302	1	815.45	0.00261332	3.20475	1	12	0.0833333	376.681	0.0857114	1.08571	FALSE	TRUE	556	406	72.3343
F:\25-03-2022\20220324-TEST BROTH-POS-00.d	1942	scanId=1095819		18.2635	650.332	453.226	2	1298.65	30	2119.39	R.DIYKEIDFEK.V	DIYKEIDFEK	DECOY_WP_031418753.1 MULTISPECIES: beta-ketoacyl-ACP synthase II [Lysinibacillus]	351	360	1	1298.64	0.0101979	7.85275	1	18	0.0555556	181.495	0.0856354	1.08564	FALSE	TRUE	556	407	72.3343
F:\25-03-2022\20220324-TEST BROTH-POS-00.d	2064	scanId=1168787		19.4796	473.747	620.646	2	945.479	41	2828.16	R.DNLINVMK.E	DNLINVMK	DECOY_WP_068983637.1 MULTISPECIES: heat-inducible transcriptional repressor HrcA [Lysinibacillus]	161	168	0	945.495	-0.0163004	-17.24	1	14	0.0714286	242.044	0.0855837	1.08558	FALSE	TRUE	556	408	72.3343
F:\25-03-2022\20220324-TEST BROTH-POS-00.d	3108	scanId=1785896		29.7648	584.29	575.938	2	1166.57	39	3197.24	K.FDSETKQNAK.T	FDSETKQNAK	DECOY_WP_012292707.1 MULTISPECIES: LPXTG cell wall anchor domain-containing protein [Lysinibacillus]	742	751	1	1166.56	0.00940765	8.06446	1	18	0.0555556	272.95	0.0853704	1.08537	FALSE	TRUE	556	409	72.3343
F:\25-03-2022\20220324-TEST BROTH-POS-00.d	2012	scanId=1136708		18.945	643.835	788.082	2	1285.65	44	2681	K.KGPFVDDHLMK.K	KGPFVDDHLMK	WP_008181911.1 MULTISPECIES: 30S ribosomal protein S19 [Lysinibacillus]	7	17	1	1285.65	0.00578431	4.49913	1	20	0.05	227.043	0.0846862	1.08469	TRUE	FALSE	557	409	72.3343
F:\25-03-2022\20220324-TEST BROTH-POS-00.d	5071	scanId=2860399		47.6732	1124.08	1168.5	2	2246.14	65	4263.17	K.KQLTC[carbamidomethylation of C]LLEHVC[carbamidomethylation of C]ERLYER.T	KQLTCLLEHVCERLYER	WP_036160791.1 MULTISPECIES: tyrosine-type recombinase/integrase [Lysinibacillus]	110	126	2	2246.13	0.0109561	4.87775	1	32	0.03125	361.007	0.0846803	1.08468	TRUE	FALSE	558	409	72.3343
F:\25-03-2022\20220324-TEST BROTH-POS-00.d	2355	scanId=1343352		22.3891	509.782	562.758	2	1017.55	44	2998.35	R.ETFGVRPGR.V	ETFGVRPGR	DECOY_WP_171821093.1 MULTISPECIES: spore germination protein [Lysinibacillus]	358	366	0	1017.54	0.0130267	12.8022	1	16	0.0625	253.791	0.0846436	1.08464	FALSE	TRUE	558	410	72.3343
F:\25-03-2022\20220324-TEST BROTH-POS-00.d	2305	scanId=1313046		21.884	667.846	671.619	2	1333.68	35	2002.86	R.TVC[carbamidomethylation of C]ILANDSTIK.A	TVCILANDSTIK	WP_012292664.1 MULTISPECIES: acyl-CoA carboxylase subunit beta [Lysinibacillus]	80	91	0	1333.69	-0.013771	-10.3255	1	22	0.0454545	166.911	0.0833364	1.08334	TRUE	FALSE	559	410	72.3343
F:\25-03-2022\20220324-TEST BROTH-POS-00.d	2942	scanId=1689219		28.1535	415.753	1768.26	2	829.491	52	4166.73	K.ELASVIAK.E	ELASVIAK	WP_036160656.1 MULTISPECIES: FtsX-like permease family protein [Lysinibacillus]	542	549	0	829.491	0.00042962	0.517932	1	14	0.0714286	340.96	0.0818292	1.08183	TRUE	FALSE	560	410	72.3343
F:\25-03-2022\20220324-TEST BROTH-POS-00.d	2623	scanId=1501078		25.0178	625.314	601.817	2	1248.61	29	2143.6	K.KGQEM(oxidation of M)QQKEK.T	KGQEMQQKEK	WP_241744848.1 MULTISPECIES: helix-turn-helix domain-containing protein [Lysinibacillus]	293	302	2	1248.61	-5.63711e-06	-0.00451469	1	18	0.0555556	175.114	0.0816915	1.08169	TRUE	FALSE	561	410	72.3343
F:\25-03-2022\20220324-TEST BROTH-POS-00.d	1015	scanId=552270		9.20437	686.86	352.006	2	1371.7	18	1126.98	-.MYDYLKGLITR.I	MYDYLKGLITR	WP_012295451.1 MULTISPECIES: Holliday junction branch migration protein RuvA [Lysinibacillus]	1	11	1	1371.72	-0.0170663	-12.4415	1	20	0.05	91.9032	0.0815481	1.08155	TRUE	FALSE	562	410	72.3343
F:\25-03-2022\20220324-TEST BROTH-POS-00.d	2257	scanId=1285009		21.4167	666.832	515.002	2	1331.65	20	1052.35	K.EAMLAKRGDWR.E	EAMLAKRGDWR	DECOY_WP_012293240.1 MULTISPECIES: chromosome segregation protein SMC [Lysinibacillus]	884	894	2	1331.68	-0.0266188	-19.989	1	20	0.05	85.7956	0.0815276	1.08153	FALSE	TRUE	562	411	72.3343
F:\25-03-2022\20220324-TEST BROTH-POS-00.d	1994	scanId=1125906		18.765	444.75	461.467	2	887.486	26	2161.5	R.VIAM(oxidation of M)PSVR.K	VIAMPSVR	WP_012293095.1 MULTISPECIES: 2-oxo acid dehydrogenase subunit E2 [Lysinibacillus]	138	145	0	887.49	-0.00363727	-4.09838	1	14	0.0714286	174.737	0.0808407	1.08084	TRUE	FALSE	563	411	72.3343
F:\25-03-2022\20220324-TEST BROTH-POS-00.d	3744	scanId=2161341		36.0222	430.264	1560.28	2	858.513	43	3663.63	R.LTLSRGGR.D	LTLSRGGR	DECOY_WP_126657228.1 MULTISPECIES: histidine--tRNA ligase [Lysinibacillus]	346	353	1	858.504	0.00987927	11.5075	1	14	0.0714286	296.136	0.0808313	1.08083	FALSE	TRUE	563	412	72.3343
F:\25-03-2022\20220324-TEST BROTH-POS-00.d	2796	scanId=1602522		26.7086	458.259	693.717	2	914.503	41	3209.51	R.VLNEAELK.S	VLNEAELK	DECOY_WP_012291944.1 MULTISPECIES: non-ribosomal peptide synthetase [Lysinibacillus]	198	205	0	914.507	-0.00383901	-4.1979	1	14	0.0714286	256.021	0.0797695	1.07977	FALSE	TRUE	563	413	72.3343
F:\25-03-2022\20220324-TEST BROTH-POS-00.d	2019	scanId=1141194		19.0198	515.766	873.262	2	1029.52	36	2467.5	-.M(oxidation of M)QKVSFFK.S	MQKVSFFK	WP_036162489.1 MULTISPECIES: cell wall metabolism sensor histidine kinase WalK [Lysinibacillus]	1	8	1	1029.53	-0.0146246	-14.2051	1	14	0.0714286	194.078	0.0786534	1.07865	TRUE	FALSE	564	413	72.3343
F:\25-03-2022\20220324-TEST BROTH-POS-00.d	5529	scanId=3133421		52.2236	1156.08	750.957	2	2310.14	62	3261.28	-.MFGQIPIELEEQGDHVIDIK.G	MFGQIPIELEEQGDHVIDIK	DECOY_WP_010857170.1 MULTISPECIES: DUF4280 domain-containing protein [Lysinibacillus]	1	20	0	2310.16	-0.0126676	-5.48342	1	38	0.0263158	254.572	0.0780589	1.07806	FALSE	TRUE	564	414	72.3343
F:\25-03-2022\20220324-TEST BROTH-POS-00.d	4399	scanId=2508333		41.8054	594.823	1990.76	2	1187.63	94	8362.62	R.LNPRDLSSMR.L	LNPRDLSSMR	WP_012293641.1 MULTISPECIES: long-chain fatty acid--CoA ligase [Lysinibacillus]	287	296	1	1187.61	0.02364	19.9056	1	18	0.0555556	648.938	0.0775998	1.0776	TRUE	FALSE	565	414	72.3343
F:\25-03-2022\20220324-TEST BROTH-POS-00.d	2004	scanId=1132443		18.8739	464.739	881.885	2	927.462	53	3698.95	K.LAHMVDDK.L	LAHMVDDK	WP_031416725.1 MULTISPECIES: DNA-directed RNA polymerase subunit beta [Lysinibacillus]	1042	1049	0	927.448	0.0140883	15.1904	1	14	0.0714286	285.694	0.0772364	1.07724	TRUE	FALSE	566	414	72.3343
F:\25-03-2022\20220324-TEST BROTH-POS-00.d	2701	scanId=1546901		25.7815	542.813	674.318	2	1083.61	27	2202.89	R.LLAPNGC[carbamidomethylation of C]IVK.V	LLAPNGCIVK	WP_012295869.1 MULTISPECIES: methyltransferase domain-containing protein [Lysinibacillus]	177	186	0	1083.61	0.000314108	0.289871	1	18	0.0555556	170.023	0.0771815	1.07718	TRUE	FALSE	567	414	72.3343
F:\25-03-2022\20220324-TEST BROTH-POS-00.d	3235	scanId=1862566		31.0426	629.852	629.225	2	1257.69	39	2695.48	M.NKLVLNNQSTK.I	NKLVLNNQSTK	DECOY_WP_036148639.1 MULTISPECIES: DUF2798 domain-containing protein [Lysinibacillus]	2	12	1	1257.7	-0.0150665	-11.9794	1	20	0.05	207	0.0767953	1.0768	FALSE	TRUE	567	415	72.3343
F:\25-03-2022\20220324-TEST BROTH-POS-00.d	1928	scanId=1087618		18.1268	588.313	722.503	2	1174.61	24	1832.5	R.ASIQSLVDSGAK.V	ASIQSLVDSGAK	WP_081010925.1 MULTISPECIES: amidase family protein [Lysinibacillus]	284	295	0	1174.62	-0.00746632	-6.35637	1	22	0.0454545	139.963	0.0763782	1.07638	TRUE	FALSE	568	415	72.3343
F:\25-03-2022\20220324-TEST BROTH-POS-00.d	1461	scanId=808861		13.4809	372.716	647.735	2	743.418	31	2540.78	K.KNQVKQ.-	KNQVKQ	WP_012295204.1 MULTISPECIES: cellulose biosynthesis cyclic di-GMP-binding regulatory protein BcsB [Lysinibacillus]	674	679	2	743.429	-0.0110839	-14.9091	1	10	0.1	192.388	0.0757199	1.07572	TRUE	FALSE	569	415	72.3343
F:\25-03-2022\20220324-TEST BROTH-POS-00.d	2011	scanId=1136376		18.9395	601.824	602.283	2	1201.63	44	3247.64	K.KGDLWVAGGATK.G	KGDLWVAGGATK	DECOY_WP_107922387.1 MULTISPECIES: tyrosine--tRNA ligase [Lysinibacillus]	177	188	1	1201.65	-0.0112039	-9.3238	1	22	0.0454545	244.877	0.0754015	1.0754	FALSE	TRUE	569	416	72.3343
F:\25-03-2022\20220324-TEST BROTH-POS-00.d	1137	scanId=621186		10.353	504.748	772.572	2	1007.48	39	2631.61	K.ILYNDENK.E	ILYNDENK	DECOY_WP_036162416.1 MULTISPECIES: DUF4272 domain-containing protein [Lysinibacillus]	354	361	0	1007.49	-0.0101054	-10.0302	1	14	0.0714286	198.408	0.0753944	1.07539	FALSE	TRUE	569	417	72.3343
F:\25-03-2022\20220324-TEST BROTH-POS-00.d	4668	scanId=2644033		44.0671	533.804	3366.54	2	1065.59	98	7148.98	K.EFFLALAQK.N	EFFLALAQK	DECOY_WP_012295634.1 MULTISPECIES: class I SAM-dependent methyltransferase [Lysinibacillus]	11	19	0	1065.59	0.00751231	7.04993	1	16	0.0625	531.634	0.074365	1.07437	FALSE	TRUE	569	418	72.3343
F:\25-03-2022\20220324-TEST BROTH-POS-00.d	3865	scanId=2230240		37.1705	401.724	2115.06	2	801.433	65	5669.15	R.RLQEEK.Q	RLQEEK	DECOY_WP_012295950.1 MULTISPECIES: HAMP domain-containing histidine kinase [Lysinibacillus]	212	217	1	801.434	-0.00174819	-2.18133	1	10	0.1	419.776	0.0740457	1.07405	FALSE	TRUE	569	419	72.3343
F:\25-03-2022\20220324-TEST BROTH-POS-00.d	10	scanId=7680		0.127867	978.938	532.736	2	1955.86	31	2222.5	R.KKEQEMENTDNMVM(oxidation of M)VD.-	KKEQEMENTDNMVMVD	WP_012292591.1 MULTISPECIES: Na+/H+ antiporter NhaC [Lysinibacillus]	467	482	2	1955.83	0.0343844	17.5805	1	30	0.0333333	160.267	0.072111	1.07211	TRUE	FALSE	570	419	72.3343
F:\25-03-2022\20220324-TEST BROTH-POS-00.d	3696	scanId=2133422		35.5569	659.831	572.275	2	1317.65	47	3403.07	K.M(oxidation of M)QERLFSTYK.A	MQERLFSTYK	WP_031417025.1 MULTISPECIES: HD domain-containing protein [Lysinibacillus]	562	571	1	1317.64	0.00831464	6.31026	1	18	0.0555556	244.9	0.0719645	1.07196	TRUE	FALSE	571	419	72.3343
F:\25-03-2022\20220324-TEST BROTH-POS-00.d	3064	scanId=1761849		29.364	529.292	1045.04	2	1056.57	42	3406.55	K.HLYNIIER.I	HLYNIIER	DECOY_WP_008181662.1 MULTISPECIES: chemotaxis protein CheW [Lysinibacillus]	14	21	0	1056.57	-0.00308961	-2.92419	1	14	0.0714286	243.002	0.0713337	1.07133	FALSE	TRUE	571	420	72.3343
F:\25-03-2022\20220324-TEST BROTH-POS-00.d	1634	scanId=911844		15.1973	381.201	452.5	2	760.387	32	2332.77	K.AC[carbamidomethylation of C]IELR.E	ACIELR	WP_036162221.1 MULTISPECIES: ATP-dependent RecD-like DNA helicase [Lysinibacillus]	277	282	0	760.39	-0.00343976	-4.52368	1	10	0.1	165.814	0.0710802	1.07108	TRUE	FALSE	572	420	72.3343
F:\25-03-2022\20220324-TEST BROTH-POS-00.d	1230	scanId=675229		11.2537	394.718	793.341	2	787.421	53	4174.01	R.LQSGEVR.L	LQSGEVR	WP_008181913.1 MULTISPECIES: 50S ribosomal protein L2 [Lysinibacillus]	176	182	0	787.419	0.00237288	3.01349	1	12	0.0833333	292.736	0.0701332	1.07013	TRUE	FALSE	573	420	72.3343
F:\25-03-2022\20220324-TEST BROTH-POS-00.d	2254	scanId=1283126		21.3853	512.741	509.9	2	1023.47	31	2246.8	K.QYPMTAEGK.R	QYPMTAEGK	WP_031419233.1 MULTISPECIES: transcription elongation factor GreA [Lysinibacillus]	6	14	0	1023.47	-0.00230265	-2.24985	1	16	0.0625	157.48	0.0700907	1.07009	TRUE	FALSE	574	420	72.3343
F:\25-03-2022\20220324-TEST BROTH-POS-00.d	2611	scanId=1493156		24.8858	531.271	717.694	2	1060.53	46	3715.79	K.LAEQSEASAR.E	LAEQSEASAR	WP_012291945.1 MULTISPECIES: methyl-accepting chemotaxis protein [Lysinibacillus]	442	451	0	1060.51	0.0116303	10.9666	1	18	0.0555556	259.015	0.0697067	1.06971	TRUE	FALSE	575	420	72.3343
F:\25-03-2022\20220324-TEST BROTH-POS-00.d	2015	scanId=1138425		18.9736	627.291	801.399	2	1252.57	48	3838.82	K.VGDLVM(oxidation of M)M(oxidation of M)PM(oxidation of M)GR.V	VGDLVMMPMGR	WP_012296135.1 MULTISPECIES: VOC family protein [Lysinibacillus]	97	107	0	1252.56	0.00513071	4.09618	1	20	0.05	267.375	0.0696503	1.06965	TRUE	FALSE	576	420	72.3343
F:\25-03-2022\20220324-TEST BROTH-POS-00.d	3807	scanId=2196623		36.6103	805.868	907.353	2	1609.72	70	4961.45	K.QM(oxidation of M)LPLYEYMNHR.L	QMLPLYEYMNHR	WP_012292914.1 MULTISPECIES: flagellar export chaperone FliS [Lysinibacillus]	78	89	0	1609.74	-0.0162901	-10.1197	1	22	0.0454545	344.05	0.0693445	1.06934	TRUE	FALSE	577	420	72.3343
F:\25-03-2022\20220324-TEST BROTH-POS-00.d	3638	scanId=2101074		35.0178	571.315	1036.02	2	1140.62	59	3724.95	K.LNSITEHSIK.K	LNSITEHSIK	WP_241744847.1 MULTISPECIES: Ger(x)C family spore germination C-terminal domain-containing protein, partial [Lysinibacillus]	121	130	0	1140.61	0.00196991	1.72706	1	18	0.0555556	257.265	0.0690654	1.06907	TRUE	FALSE	578	420	72.3343
F:\25-03-2022\20220324-TEST BROTH-POS-00.d	3712	scanId=2142841		35.7139	613.341	755.77	2	1224.67	35	2403.37	M.EKSELIEHLK.L	EKSELIEHLK	DECOY_WP_227256911.1 MULTISPECIES: flagellar assembly protein FliH [Lysinibacillus]	2	11	1	1224.67	-0.00411285	-3.35833	1	18	0.0555556	165.194	0.0687343	1.06873	FALSE	TRUE	578	421	72.5065
F:\25-03-2022\20220324-TEST BROTH-POS-00.d	1585	scanId=883797		14.7298	627.818	315.007	2	1253.62	30	1922.07	K.TSAAEVPTGFFK.A	TSAAEVPTGFFK	DECOY_WP_012295210.1 MULTISPECIES: 3-phosphoserine/phosphohydroxythreonine transaminase [Lysinibacillus]	241	252	0	1253.63	-0.00779939	-6.22145	1	22	0.0454545	131.329	0.068327	1.06833	FALSE	TRUE	578	422	72.5532
F:\25-03-2022\20220324-TEST BROTH-POS-00.d	1384	scanId=763911		12.7317	402.235	462.704	2	802.455	25	1858.85	K.RMLQQK.I	RMLQQK	WP_206700899.1 MULTISPECIES: DsbA family protein [Lysinibacillus]	255	260	1	802.448	0.00672717	8.3833	1	10	0.1	124.449	0.0669497	1.06695	TRUE	FALSE	579	422	72.5532
F:\25-03-2022\20220324-TEST BROTH-POS-00.d	2453	scanId=1403185		23.3863	674.353	608.756	2	1346.69	29	2010.1	M.VAQELMAELESK.N	VAQELMAELESK	DECOY_WP_036161726.1 MULTISPECIES: Hsp33 family molecular chaperone HslO [Lysinibacillus]	2	13	0	1346.68	0.0162847	12.0925	1	22	0.0454545	133.571	0.0664502	1.06645	FALSE	TRUE	579	423	72.7252
F:\25-03-2022\20220324-TEST BROTH-POS-00.d	1744	scanId=979446		16.324	650.329	1000.41	2	1298.64	27	2093.47	K.VSYGLASC[carbamidomethylation of C]MRR.I	VSYGLASCMRR	DECOY_WP_012296108.1 MULTISPECIES: 23S rRNA pseudouridine(2604) synthase RluF [Lysinibacillus]	43	53	1	1298.62	0.0212132	16.3352	1	20	0.05	139.074	0.0664324	1.06643	FALSE	TRUE	579	424	72.7714
F:\25-03-2022\20220324-TEST BROTH-POS-00.d	2245	scanId=1277640		21.2939	412.194	774.612	2	822.374	37	2539.28	K.TLTIC[carbamidomethylation of C]SE.-	TLTICSE	WP_012293771.1 MULTISPECIES: phosphate propanoyltransferase [Lysinibacillus]	283	289	0	822.379	-0.00492636	-5.99037	1	12	0.0833333	168.062	0.0661851	1.06619	TRUE	FALSE	580	424	72.7714
F:\25-03-2022\20220324-TEST BROTH-POS-00.d	2323	scanId=1323628		22.0603	576.283	631.382	2	1150.55	36	2173.85	R.EEVSQRFEK.A	EEVSQRFEK	DECOY_WP_036076801.1 MULTISPECIES: membrane protein [Lysinibacillus]	14	22	1	1150.56	-0.0101309	-8.80521	1	16	0.0625	143.467	0.065997	1.066	FALSE	TRUE	580	425	72.9092
F:\25-03-2022\20220324-TEST BROTH-POS-00.d	3495	scanId=2017367		33.6227	388.202	1202.57	2	774.39	51	4525.4	R.LEKDDR.I	LEKDDR	DECOY_WP_036161492.1 MULTISPECIES: Ger(x)C family spore germination protein [Lysinibacillus]	128	133	1	774.387	0.0031409	4.05598	1	10	0.1	298.145	0.0658826	1.06588	FALSE	TRUE	580	426	72.9092
F:\25-03-2022\20220324-TEST BROTH-POS-00.d	2275	scanId=1295592		21.5931	702.86	1051.36	2	1403.7	28	1743.91	K.AGSIGTSISNVENR.V	AGSIGTSISNVENR	WP_012292212.1 MULTISPECIES: fatty acid--CoA ligase family protein [Lysinibacillus]	338	351	0	1403.7	0.00409712	2.9188	1	26	0.0384615	114.858	0.0658623	1.06586	TRUE	FALSE	581	426	72.9092
F:\25-03-2022\20220324-TEST BROTH-POS-00.d	2561	scanId=1464624		24.4103	372.231	584.977	2	742.447	34	2764.27	M.QLILEK.E	QLILEK	DECOY_WP_058845049.1 MULTISPECIES: SulP family inorganic anion transporter [Lysinibacillus]	2	7	0	742.459	-0.0116003	-15.6241	1	10	0.1	181.509	0.0656625	1.06566	FALSE	TRUE	581	427	72.9092
F:\25-03-2022\20220324-TEST BROTH-POS-00.d	2613	scanId=1494541		24.9089	519.291	754.293	2	1036.57	38	2972.73	K.NLWVYSKK.W	NLWVYSKK	WP_012293621.1 MULTISPECIES: site-specific integrase [Lysinibacillus]	278	285	1	1036.57	-0.00224268	-2.16356	1	14	0.0714286	195.165	0.0656518	1.06565	TRUE	FALSE	582	427	72.9092
F:\25-03-2022\20220324-TEST BROTH-POS-00.d	3531	scanId=2039475		33.9911	694.393	1068.07	2	1386.77	84	6333.06	K.SLLEEDKIELAK.S	SLLEEDKIELAK	WP_012292245.1 MULTISPECIES: phosphoglycerate kinase [Lysinibacillus]	237	248	1	1386.76	0.0103317	7.45025	1	22	0.0454545	415.44	0.0655987	1.0656	TRUE	FALSE	583	427	72.9092
F:\25-03-2022\20220324-TEST BROTH-POS-00.d	2767	scanId=1585958		26.4325	780.906	614.494	2	1559.8	42	3384.64	-.M(oxidation of M)NTGGYIITVNPHK.L	MNTGGYIITVNPHK	DECOY_WP_012292138.1 MULTISPECIES: glucosamine-6-phosphate deaminase [Lysinibacillus]	1	14	0	1559.78	0.0211238	13.5428	1	26	0.0384615	221.16	0.0653423	1.06534	FALSE	TRUE	583	428	73.0799
F:\25-03-2022\20220324-TEST BROTH-POS-00.d	2124	scanId=1204575		20.0761	541.264	600.675	2	1080.51	35	2967.95	K.LMYEVDVGR.A	LMYEVDVGR	DECOY_WP_012292240.1 MULTISPECIES: S9 family peptidase [Lysinibacillus]	32	40	0	1080.53	-0.013474	-12.4698	1	16	0.0625	192.379	0.0648187	1.06482	FALSE	TRUE	583	429	73.2507
F:\25-03-2022\20220324-TEST BROTH-POS-00.d	2273	scanId=1294207		21.57	638.305	935.907	2	1274.6	57	4138.07	K.EDTISPNVTGDK.F	EDTISPNVTGDK	DECOY_WP_012293980.1 MULTISPECIES: iron uptake transporter deferrochelatase/peroxidase subunit [Lysinibacillus]	173	184	0	1274.6	-0.00270842	-2.12492	1	22	0.0454545	263.499	0.0636768	1.06368	FALSE	TRUE	583	430	73.4214
F:\25-03-2022\20220324-TEST BROTH-POS-00.d	2587	scanId=1479306		24.655	411.225	540.609	2	820.435	52	4580.7	K.AINNYVK.I	AINNYVK	DECOY_WP_232901020.1 MULTISPECIES: cell wall-binding protein [Lysinibacillus]	157	163	0	820.444	-0.00894494	-10.9026	1	12	0.0833333	291.586	0.0636554	1.06366	FALSE	TRUE	583	431	73.5922
F:\25-03-2022\20220324-TEST BROTH-POS-00.d	3355	scanId=1932818		32.2135	539.28	695.921	2	1076.55	37	2723.97	K.DLVVFNENK.V	DLVVFNENK	DECOY_WP_208704347.1 MULTISPECIES: DnaD domain protein [Lysinibacillus]	257	265	0	1076.55	-0.00430493	-3.99882	1	16	0.0625	173.39	0.0636535	1.06365	FALSE	TRUE	583	432	73.7629
F:\25-03-2022\20220324-TEST BROTH-POS-00.d	5445	scanId=3082881		51.3812	613.369	1529.35	2	1224.72	79	5241.62	R.INGVAVRVEIR.H	INGVAVRVEIR	DECOY_WP_012295791.1 MULTISPECIES: GNAT family N-acetyltransferase [Lysinibacillus]	55	65	1	1224.73	-0.0063461	-5.18163	1	20	0.05	330.973	0.0631434	1.06314	FALSE	TRUE	583	433	73.9337
F:\25-03-2022\20220324-TEST BROTH-POS-00.d	2025	scanId=1145348		19.089	488.254	619.789	2	974.493	40	2632.55	K.MEAIIQDR.N	MEAIIQDR	DECOY_WP_036160877.1 MULTISPECIES: Ppx/GppA family phosphatase [Lysinibacillus]	420	427	0	974.486	0.00742902	7.62353	1	14	0.0714286	166.132	0.0631069	1.06311	FALSE	TRUE	583	434	73.9483
F:\25-03-2022\20220324-TEST BROTH-POS-00.d	3966	scanId=2285397		38.0898	676.349	775.534	2	1350.68	47	3038.27	R.IDYEQELRSAK.K	IDYEQELRSAK	WP_012295582.1 MULTISPECIES: sensor domain-containing diguanylate cyclase [Lysinibacillus]	113	123	1	1350.68	0.00487954	3.61266	1	20	0.05	191.696	0.0630937	1.06309	TRUE	FALSE	584	434	73.9483
F:\25-03-2022\20220324-TEST BROTH-POS-00.d	1134	scanId=619469		10.3244	517.264	513.035	2	1032.51	26	2123.9	R.MGAKEAPSSR.V	MGAKEAPSSR	DECOY_WP_012292929.1 MULTISPECIES: S41 family peptidase [Lysinibacillus]	355	364	1	1032.5	0.0105312	10.1997	1	18	0.0555556	133.565	0.0628868	1.06289	FALSE	TRUE	584	435	73.9483
F:\25-03-2022\20220324-TEST BROTH-POS-00.d	3719	scanId=2147327		35.7886	728.366	1049.66	2	1454.72	58	3679.43	K.EEVLRM(oxidation of M)GEHALR.G	EEVLRMGEHALR	WP_031416973.1 MULTISPECIES: Na/Pi cotransporter family protein [Lysinibacillus]	346	357	1	1454.73	-0.0120411	-8.27717	1	22	0.0454545	230.173	0.0625567	1.06256	TRUE	FALSE	585	435	73.9483
F:\25-03-2022\20220324-TEST BROTH-POS-00.d	3701	scanId=2136691		35.6114	403.235	964.435	2	804.455	52	3577.76	K.ITTLMAR.L	ITTLMAR	DECOY_WP_031416734.1 MULTISPECIES: CtsR family transcriptional regulator [Lysinibacillus]	8	14	0	804.453	0.00240587	2.99069	1	12	0.0833333	223.782	0.0625481	1.06255	FALSE	TRUE	585	436	73.9483
F:\25-03-2022\20220324-TEST BROTH-POS-00.d	2595	scanId=1483739		24.7289	531.324	472.512	2	1060.63	34	2481.05	R.KNFLAVTLR.L	KNFLAVTLR	DECOY_WP_012295645.1 MULTISPECIES: GNAT family N-acetyltransferase [Lysinibacillus]	32	40	1	1060.64	-0.00674427	-6.35868	1	16	0.0625	155.184	0.0625476	1.06255	FALSE	TRUE	585	437	73.9483
F:\25-03-2022\20220324-TEST BROTH-POS-00.d	3104	scanId=1783680		29.7279	818.888	582.014	2	1635.76	25	1510.69	K.YDSYKGTGNVEYIK.G	YDSYKGTGNVEYIK	DECOY_WP_164908716.1 MULTISPECIES: stalk domain-containing protein [Lysinibacillus]	231	244	1	1635.78	-0.0163764	-10.0114	1	26	0.0384615	93.4706	0.0618726	1.06187	FALSE	TRUE	585	438	73.9483
F:\25-03-2022\20220324-TEST BROTH-POS-00.d	2946	scanId=1691269		28.1877	950.003	1138.83	2	1897.99	48	2617.08	K.HLTVSQASVVMGC[carbamidomethylation of C]GLLAR.A	HLTVSQASVVMGCGLLAR	WP_036161791.1 MULTISPECIES: MFS transporter [Lysinibacillus]	34	51	0	1897.99	0.00501444	2.64198	1	34	0.0294118	158.645	0.060619	1.06062	TRUE	FALSE	586	438	73.9483
F:\25-03-2022\20220324-TEST BROTH-POS-00.d	1819	scanId=1023549		17.059	422.741	1013.25	2	843.467	35	3304.08	K.LVDQLEK.E	LVDQLEK	WP_051563180.1 MULTISPECIES: M23 family metallopeptidase [Lysinibacillus]	226	232	0	843.47	-0.00275639	-3.26792	1	12	0.0833333	200.145	0.0605749	1.06057	TRUE	FALSE	587	438	73.9483
F:\25-03-2022\20220324-TEST BROTH-POS-00.d	1367	scanId=753829		12.5637	541.271	994.163	2	1080.53	35	2700.16	R.VQHIYMYK.C	VQHIYMYK	DECOY_WP_012294139.1 MULTISPECIES: hypothetical protein [Lysinibacillus]	41	48	0	1080.54	-0.016045	-14.849	1	14	0.0714286	163.113	0.0604085	1.06041	FALSE	TRUE	587	439	73.9483
F:\25-03-2022\20220324-TEST BROTH-POS-00.d	3479	scanId=2007397		33.4565	978.479	544.703	2	1954.94	26	1764.82	R.QFIRSEGQGVQTTTFEK.L	QFIRSEGQGVQTTTFEK	WP_012292938.1 MULTISPECIES: helicase-exonuclease AddAB subunit AddA [Lysinibacillus]	694	710	1	1954.97	-0.0304647	-15.5832	1	32	0.03125	105.841	0.0599727	1.05997	TRUE	FALSE	588	439	73.9483
F:\25-03-2022\20220324-TEST BROTH-POS-00.d	2263	scanId=1288609		21.4767	480.26	1509.45	2	958.505	42	3746.86	K.REEVVAEK.K	REEVVAEK	DECOY_WP_012295295.1 MULTISPECIES: Clp protease ClpP [Lysinibacillus]	90	97	1	958.508	-0.0034432	-3.59225	1	14	0.0714286	223.13	0.0595512	1.05955	FALSE	TRUE	588	440	73.9483
F:\25-03-2022\20220324-TEST BROTH-POS-00.d	1381	scanId=762028		12.7003	552.284	643.95	2	1102.55	25	1926.17	K.LWESEAAAAR.T	LWESEAAAAR	WP_012293044.1 MULTISPECIES: 2,4-dienoyl-CoA reductase [Lysinibacillus]	197	206	0	1102.54	0.0133776	12.1335	1	18	0.0555556	114.509	0.059449	1.05945	TRUE	FALSE	589	440	73.9483
F:\25-03-2022\20220324-TEST BROTH-POS-00.d	2969	scanId=1703732		28.3954	874.972	1096.37	2	1747.93	49	3037.42	K.DNYKALIGPLSLEMGK.E	DNYKALIGPLSLEMGK	DECOY_WP_012295699.1 MULTISPECIES: DUF1444 domain-containing protein [Lysinibacillus]	219	234	1	1747.92	0.0115385	6.60129	1	30	0.0333333	180.492	0.0594228	1.05942	FALSE	TRUE	589	441	73.9483
F:\25-03-2022\20220324-TEST BROTH-POS-00.d	2451	scanId=1401800		23.3632	628.367	385.12	2	1254.72	30	1987.56	R.AKIAEIQARQK.L	AKIAEIQARQK	WP_048391396.1 MULTISPECIES: tRNA (adenosine(37)-N6)-dimethylallyltransferase MiaA [Lysinibacillus]	89	99	2	1254.74	-0.020647	-16.4552	1	20	0.05	118	0.0593693	1.05937	TRUE	FALSE	590	441	73.9483
F:\25-03-2022\20220324-TEST BROTH-POS-00.d	3265	scanId=1880350		31.339	465.768	649.859	2	929.522	50	3591.3	K.KTPEQLSK.I	KTPEQLSK	DECOY_WP_068983456.1 MULTISPECIES: tryptophan--tRNA ligase [Lysinibacillus]	140	147	1	929.518	0.00392835	4.22622	1	14	0.0714286	212.27	0.0591068	1.05911	FALSE	TRUE	590	442	73.9483
F:\25-03-2022\20220324-TEST BROTH-POS-00.d	986	scanId=536795		8.94645	532.769	408.269	2	1063.52	37	3279.39	R.ESLQAC[carbamidomethylation of C]TKK.G	ESLQACTKK	WP_031419480.1 MULTISPECIES: MBL fold metallo-hydrolase [Lysinibacillus]	94	102	1	1063.53	-0.0102118	-9.60176	1	16	0.0625	193.571	0.0590266	1.05903	TRUE	FALSE	591	442	73.9483
F:\25-03-2022\20220324-TEST BROTH-POS-00.d	2670	scanId=1529167		25.486	642.814	809.395	2	1283.61	37	2468.78	R.FEFRDPFGNR.V	FEFRDPFGNR	WP_012293959.1 MULTISPECIES: VOC family protein [Lysinibacillus]	104	113	1	1283.6	0.00932121	7.26174	1	18	0.0555556	144.557	0.0585538	1.05855	TRUE	FALSE	592	442	73.9483
F:\25-03-2022\20220324-TEST BROTH-POS-00.d	1656	scanId=926133		15.4354	318.672	960.686	2	635.329	41	3165.25	R.VTNFR.L	VTNFR	WP_012293805.1 MULTISPECIES: dynamin family protein [Lysinibacillus]	1049	1053	0	635.339	-0.0105736	-16.6424	1	8	0.125	184.781	0.0583779	1.05838	TRUE	FALSE	593	442	73.9483
F:\25-03-2022\20220324-TEST BROTH-POS-00.d	3150	scanId=1811873		30.1977	525.271	634.89	2	1048.53	29	1855.53	R.ITVATNM(oxidation of M)AGR.G	ITVATNMAGR	WP_031418679.1 MULTISPECIES: accessory Sec system translocase SecA2 [Lysinibacillus]	481	490	0	1048.53	-0.0059717	-5.69529	1	18	0.0555556	108.284	0.0583575	1.05836	TRUE	FALSE	594	442	73.9483
F:\25-03-2022\20220324-TEST BROTH-POS-00.d	3344	scanId=1926501		32.1082	550.819	923.248	2	1099.62	72	4133.27	K.AINEVSIGAVK.Q	AINEVSIGAVK	WP_012295862.1 MULTISPECIES: methyl-accepting chemotaxis protein [Lysinibacillus]	307	317	0	1099.62	-0.000432373	-0.393201	1	20	0.05	240.833	0.0582671	1.05827	TRUE	FALSE	595	442	73.9483
F:\25-03-2022\20220324-TEST BROTH-POS-00.d	1773	scanId=997452		16.6241	384.74	1255.51	2	767.466	35	2729.36	M.HIDKKK.F	HIDKKK	DECOY_WP_139015372.1 MULTISPECIES: YitT family protein [Lysinibacillus]	2	7	2	767.465	0.000502214	0.65438	1	10	0.1	157.144	0.0575753	1.05758	FALSE	TRUE	595	443	74.1156
F:\25-03-2022\20220324-TEST BROTH-POS-00.d	804	scanId=436367		7.27265	504.763	563.121	2	1007.51	29	2319.35	R.IDYIIEKD.-	IDYIIEKD	DECOY_WP_012294202.1 MULTISPECIES: MarR family winged helix-turn-helix transcriptional regulator [Lysinibacillus]	137	144	1	1007.52	-0.005088	-5.05004	1	14	0.0714286	133.141	0.0574044	1.0574	FALSE	TRUE	595	444	74.2829
F:\25-03-2022\20220324-TEST BROTH-POS-00.d	2902	scanId=1664678		27.7445	570.826	1000.46	2	1139.64	33	2478.85	K.VNLKNIFHR.L	VNLKNIFHR	DECOY_WP_008180529.1 MULTISPECIES: rod shape-determining protein [Lysinibacillus]	244	252	1	1139.66	-0.0192143	-16.8598	1	16	0.0625	142.285	0.0573998	1.0574	FALSE	TRUE	595	445	74.4502
F:\25-03-2022\20220324-TEST BROTH-POS-00.d	1130	scanId=617253		10.2874	293.174	909.894	2	584.333	32	2285.31	K.IAEPR.T	IAEPR	DECOY_WP_012292762.1 MULTISPECIES: UDP-N-acetylglucosamine 2-epimerase (non-hydrolyzing) [Lysinibacillus]	357	361	0	584.328	0.00440414	7.5371	1	8	0.125	131.163	0.0573943	1.05739	FALSE	TRUE	595	446	74.5343
F:\25-03-2022\20220324-TEST BROTH-POS-00.d	1658	scanId=927518		15.4585	689.34	482.524	2	1376.67	23	1296.01	K.SDVLMAGSQVNTR.D	SDVLMAGSQVNTR	DECOY_WP_012294071.1 MULTISPECIES: hypothetical protein [Lysinibacillus]	19	31	0	1376.67	-0.00641065	-4.65663	1	24	0.0416667	74.2975	0.0573279	1.05733	FALSE	TRUE	595	447	74.5343
F:\25-03-2022\20220324-TEST BROTH-POS-00.d	2798	scanId=1603907		26.7316	479.792	1034.55	2	957.57	53	4723.83	K.GGPYPIKVK.V	GGPYPIKVK	WP_012293860.1 MULTISPECIES: hydantoinase B/oxoprolinase family protein [Lysinibacillus]	251	259	1	957.565	0.00543034	5.67099	1	16	0.0625	268	0.0567336	1.05673	TRUE	FALSE	596	447	74.5343
F:\25-03-2022\20220324-TEST BROTH-POS-00.d	2208	scanId=1255035		20.9171	474.737	920.495	2	947.459	35	2647.74	K.QDKETEAK.Q	QDKETEAK	WP_206701026.1 MULTISPECIES: FTR1 family protein [Lysinibacillus]	29	36	1	947.456	0.00294201	3.10516	1	14	0.0714286	150.014	0.0566573	1.05666	TRUE	FALSE	597	447	74.5343
F:\25-03-2022\20220324-TEST BROTH-POS-00.d	4713	scanId=2667267		44.4543	699.378	2531.76	2	1396.74	71	7720.01	R.SLAPQSIALAEAAR.T	SLAPQSIALAEAAR	DECOY_WP_031419566.1 MULTISPECIES: LysR family transcriptional regulator [Lysinibacillus]	270	283	0	1396.77	-0.0260946	-18.6821	1	26	0.0384615	432.029	0.0559621	1.05596	FALSE	TRUE	597	448	74.701
F:\25-03-2022\20220324-TEST BROTH-POS-00.d	2248	scanId=1279524		21.3253	582.318	449.245	2	1162.62	25	1669.58	K.TIIM(oxidation of M)QIAMAR.R	TIIMQIAMAR	DECOY_WP_012292731.1 MULTISPECIES: methylmalonyl-CoA mutase family protein [Lysinibacillus]	171	180	0	1162.62	0.00143203	1.23173	1	18	0.0555556	93.3484	0.0559112	1.05591	FALSE	TRUE	597	449	74.8253
F:\25-03-2022\20220324-TEST BROTH-POS-00.d	3515	scanId=2029722		33.8286	575.798	920.2	2	1149.58	53	4252.05	R.TKVDMQWSR.A	TKVDMQWSR	DECOY_WP_012295275.1 MULTISPECIES: hypothetical protein [Lysinibacillus]	72	80	1	1149.56	0.0223576	19.4488	1	16	0.0625	237.083	0.0557574	1.05576	FALSE	TRUE	597	450	74.8253
F:\25-03-2022\20220324-TEST BROTH-POS-00.d	2576	scanId=1472438		24.5405	613.337	640.306	2	1224.66	27	2297.24	R.MSFIMNNLKK.T	MSFIMNNLKK	WP_036161513.1 MULTISPECIES: arsenite efflux transporter metallochaperone ArsD [Lysinibacillus]	29	38	1	1224.64	0.0231821	18.9298	1	18	0.0555556	128.075	0.0557516	1.05575	TRUE	FALSE	598	450	74.8253
F:\25-03-2022\20220324-TEST BROTH-POS-00.d	4129	scanId=2371973		39.5328	550.802	1653.2	2	1099.59	59	4333.05	K.DLLPDLWTK.Q	DLLPDLWTK	DECOY_WP_036162141.1 MULTISPECIES: potassium-transporting ATPase subunit KdpA [Lysinibacillus]	528	536	0	1099.59	-0.000947579	-0.861756	1	16	0.0625	241.166	0.0556573	1.05566	FALSE	TRUE	598	451	74.8253
F:\25-03-2022\20220324-TEST BROTH-POS-00.d	3186	scanId=1833694		30.5614	569.837	982.082	2	1137.66	43	2730.24	K.GPLTTPIGGGIR.S	GPLTTPIGGGIR	WP_031418629.1 MULTISPECIES: NADP-dependent isocitrate dehydrogenase [Lysinibacillus]	90	101	0	1137.65	0.00968626	8.51427	1	22	0.0454545	151.679	0.0555552	1.05556	TRUE	FALSE	599	451	74.8253
F:\25-03-2022\20220324-TEST BROTH-POS-00.d	3709	scanId=2141124		35.6853	413.21	996.017	2	824.406	44	3625.94	K.IDGETYK.L	IDGETYK	WP_012296206.1 MULTISPECIES: adenylosuccinate synthase [Lysinibacillus]	45	51	0	824.392	0.0143026	17.3493	1	12	0.0833333	201.023	0.0554403	1.05544	TRUE	FALSE	600	451	74.8253
F:\25-03-2022\20220324-TEST BROTH-POS-00.d	2889	scanId=1657696		27.6281	636.849	529.243	2	1271.68	36	2690.71	K.TQPKDSINTLR.V	TQPKDSINTLR	DECOY_WP_012296004.1 MULTISPECIES: DUF4179 domain-containing protein [Lysinibacillus]	98	108	1	1271.68	-0.000904851	-0.711538	1	20	0.05	148.278	0.0551074	1.05511	FALSE	TRUE	600	452	74.9074
F:\25-03-2022\20220324-TEST BROTH-POS-00.d	2664	scanId=1525399		25.4232	519.26	542.156	2	1036.51	31	1565.09	R.KMMMLPMR.V	KMMMLPMR	DECOY_WP_171821093.1 MULTISPECIES: spore germination protein [Lysinibacillus]	33	40	1	1036.51	0.000985075	0.950381	1	14	0.0714286	86.2057	0.0550805	1.05508	FALSE	TRUE	600	453	74.9074
F:\25-03-2022\20220324-TEST BROTH-POS-00.d	3232	scanId=1860848		31.014	621.345	819.18	2	1240.67	43	3748.41	K.NVDHAVFQLAK.T	NVDHAVFQLAK	WP_036161113.1 MULTISPECIES: BMP family ABC transporter substrate-binding protein [Lysinibacillus]	256	266	0	1240.66	0.0183469	14.788	1	20	0.05	204.161	0.054466	1.05447	TRUE	FALSE	601	453	74.9074
F:\25-03-2022\20220324-TEST BROTH-POS-00.d	3026	scanId=1738408		28.9733	700.366	618.268	2	1398.72	37	2356.78	R.IYRLYAERMGK.Y	IYRLYAERMGK	WP_012293380.1 MULTISPECIES: DUF2339 domain-containing protein [Lysinibacillus]	576	586	2	1398.74	-0.0263878	-18.8654	1	20	0.05	127.799	0.0542263	1.05423	TRUE	FALSE	602	453	74.9074
F:\25-03-2022\20220324-TEST BROTH-POS-00.d	1407	scanId=776774		12.9461	660.816	313.003	2	1319.62	15	1283.71	-.M(oxidation of M)DERKFMYGK.Y	MDERKFMYGK	DECOY_WP_036160718.1 MULTISPECIES: rod shape-determining protein RodA [Lysinibacillus]	1	10	2	1319.6	0.0172723	13.0891	1	18	0.0555556	69.4803	0.0541244	1.05412	FALSE	TRUE	602	454	75.0727
F:\25-03-2022\20220324-TEST BROTH-POS-00.d	1395	scanId=770395		12.8398	516.307	515.352	2	1030.6	30	2107.36	R.MATVIDLLR.G	MATVIDLLR	DECOY_WP_012291866.1 MULTISPECIES: tRNA1(Val) (adenine(37)-N6)-methyltransferase [Lysinibacillus]	66	74	0	1030.58	0.0142675	13.844	1	16	0.0625	113.88	0.0540392	1.05404	FALSE	TRUE	602	455	75.1538
F:\25-03-2022\20220324-TEST BROTH-POS-00.d	2695	scanId=1543468		25.7243	981.551	329.128	2	1961.09	26	1413.61	K.SPLQEHGLLRKSLISQR.I	SPLQEHGLLRKSLISQR	DECOY_WP_206701063.1 MULTISPECIES: PLP-dependent aminotransferase family protein [Lysinibacillus]	417	433	2	1961.12	-0.0285986	-14.5828	1	32	0.03125	76	0.0537629	1.05376	FALSE	TRUE	602	456	75.1538
F:\25-03-2022\20220324-TEST BROTH-POS-00.d	4163	scanId=2389620		39.8269	395.227	4699.43	2	788.44	81	8602.78	R.EVPAFVK.E	EVPAFVK	WP_241744852.1 MULTISPECIES: 3-hydroxyacyl-CoA dehydrogenase/enoyl-CoA hydratase family protein [Lysinibacillus]	406	412	0	788.443	-0.00362597	-4.5989	1	12	0.0833333	458.752	0.053326	1.05333	TRUE	FALSE	603	456	75.1538
F:\25-03-2022\20220324-TEST BROTH-POS-00.d	3370	scanId=1942070		32.3677	614.835	827.254	2	1227.65	49	3050.66	K.EVRKEEVPSR.E	EVRKEEVPSR	WP_012293212.1 MULTISPECIES: Stk1 family PASTA domain-containing Ser/Thr kinase [Lysinibacillus]	466	475	2	1227.66	-0.00226404	-1.84419	1	18	0.0555556	162.633	0.0533108	1.05331	TRUE	FALSE	604	456	75.1538
F:\25-03-2022\20220324-TEST BROTH-POS-00.d	4695	scanId=2657880		44.2979	704.886	1441.31	2	1407.76	72	5868.08	-.MKSNLKSVYNPK.N	MKSNLKSVYNPK	DECOY_WP_031416107.1 MULTISPECIES: bifunctional UDP-N-acetylglucosamine diphosphorylase/glucosamine-1-phosphate N-acetyltransferase GlmU [Lysinibacillus]	1	12	2	1407.75	0.00356771	2.53433	1	22	0.0454545	312.509	0.0532558	1.05326	FALSE	TRUE	604	457	75.1941
F:\25-03-2022\20220324-TEST BROTH-POS-00.d	1968	scanId=1110668		18.511	498.271	843.649	2	994.527	48	3762.97	R.KIAETFMR.D	KIAETFMR	WP_012295794.1 MULTISPECIES: DEAD/DEAH box helicase [Lysinibacillus]	191	198	1	994.527	-0.000108776	-0.109375	1	14	0.0714286	200.037	0.0531592	1.05316	TRUE	FALSE	605	457	75.1941
F:\25-03-2022\20220324-TEST BROTH-POS-00.d	2017	scanId=1139809		18.9967	468.235	947.782	2	934.456	37	2751.83	K.LWKGM(oxidation of M)ER.L	LWKGMER	DECOY_WP_066037066.1 MULTISPECIES: coproporphyrinogen III oxidase [Lysinibacillus]	279	285	1	934.469	-0.0136845	-14.6441	1	12	0.0833333	145.352	0.0528203	1.05282	FALSE	TRUE	605	458	75.3586
F:\25-03-2022\20220324-TEST BROTH-POS-00.d	4643	scanId=2630837		43.8471	660.865	1450.93	2	1319.72	102	8079.94	-.MKIATIC[carbamidomethylation of C]LWGK.S	MKIATICLWGK	DECOY_WP_012294119.1 MULTISPECIES: class I SAM-dependent methyltransferase [Lysinibacillus]	1	11	1	1319.71	0.00571271	4.32876	1	20	0.05	426.126	0.0527387	1.05274	FALSE	TRUE	605	459	75.5232
F:\25-03-2022\20220324-TEST BROTH-POS-00.d	1280	scanId=704660		11.7442	632.313	1148.35	2	1262.61	37	2369.49	R.IAPTISEFDDR.N	IAPTISEFDDR	DECOY_WP_012293186.1 MULTISPECIES: carbamoyl phosphate synthase small subunit [Lysinibacillus]	292	302	0	1262.61	-0.00237327	-1.87965	1	20	0.05	124.572	0.0525735	1.05257	FALSE	TRUE	605	460	75.5628
F:\25-03-2022\20220324-TEST BROTH-POS-00.d	6496	scanId=3687444		61.4573	805.495	4699.67	2	1608.98	211	17553.3	K.AALPVMEGKAILLKR.F	AALPVMEGKAILLKR	WP_036161253.1 MULTISPECIES: malate dehydrogenase [Lysinibacillus]	83	97	2	1608.97	0.000153022	0.0951054	1	28	0.0357143	918.356	0.0523181	1.05232	TRUE	FALSE	606	460	75.5628
F:\25-03-2022\20220324-TEST BROTH-POS-00.d	1945	scanId=1097536		18.2921	283.174	1023.51	2	564.334	45	3697.1	K.TLFGK.K	TLFGK	DECOY_WP_227256943.1 MULTISPECIES: recombinase family protein [Lysinibacillus]	327	331	0	564.327	0.006612	11.7166	1	8	0.125	193.099	0.0522299	1.05223	FALSE	TRUE	606	461	75.7271
F:\25-03-2022\20220324-TEST BROTH-POS-00.d	3885	scanId=2241540		37.3589	1171.62	1127.2	2	2341.23	62	3710.7	K.VGM(oxidation of M)LRAPLVRTDNLVLC[carbamidomethylation of C]DGAR.L	VGMLRAPLVRTDNLVLCDGAR	DECOY_WP_036119217.1 MULTISPECIES: tRNA preQ1(34) S-adenosylmethionine ribosyltransferase-isomerase QueA [Lysinibacillus]	277	297	2	2341.24	-0.00512293	-2.18813	1	40	0.025	193.452	0.0521335	1.05213	FALSE	TRUE	606	462	75.7663
F:\25-03-2022\20220324-TEST BROTH-POS-00.d	3550	scanId=2050776		34.1795	524.296	1324.16	2	1046.58	41	3411.9	K.VSQGVRM(oxidation of M)VR.V	VSQGVRMVR	WP_012293212.1 MULTISPECIES: Stk1 family PASTA domain-containing Ser/Thr kinase [Lysinibacillus]	503	511	1	1046.57	0.0117274	11.2056	1	16	0.0625	177.498	0.0520232	1.05202	TRUE	FALSE	607	462	75.7663
F:\25-03-2022\20220324-TEST BROTH-POS-00.d	4833	scanId=2729828		45.497	685.91	4669.06	2	1369.81	90	6578.15	-.M(oxidation of M)LKVINKAQPGR.N	MLKVINKAQPGR	DECOY_WP_010859579.1 MULTISPECIES: cold-shock protein [Lysinibacillus]	1	12	2	1369.79	0.0197737	14.4356	1	22	0.0454545	342.193	0.0520196	1.05202	FALSE	TRUE	607	463	75.9303
F:\25-03-2022\20220324-TEST BROTH-POS-00.d	2961	scanId=1698747		28.3123	644.836	1032.05	2	1287.66	58	3832.72	R.EMDVISHTKTK.Y	EMDVISHTKTK	DECOY_WP_036162511.1 MULTISPECIES: 23S rRNA (uracil(1939)-C(5))-methyltransferase RlmD [Lysinibacillus]	296	306	1	1287.65	0.00744197	5.7795	1	20	0.05	199.027	0.0519283	1.05193	FALSE	TRUE	607	464	76.0943
F:\25-03-2022\20220324-TEST BROTH-POS-00.d	2929	scanId=1680965		28.016	466.746	1028.39	2	931.478	36	2732.64	K.FIYAYAGK.Y	FIYAYAGK	DECOY_WP_031417531.1 MULTISPECIES: N-acetylmuramoyl-L-alanine amidase [Lysinibacillus]	350	357	0	931.48	-0.00199789	-2.14486	1	14	0.0714286	141.817	0.0518973	1.0519	FALSE	TRUE	607	465	76.2583
F:\25-03-2022\20220324-TEST BROTH-POS-00.d	2667	scanId=1527283		25.4546	691.331	785.199	2	1380.65	37	2819.65	K.EAVSGLMMKEMR.N	EAVSGLMMKEMR	DECOY_WP_012295501.1 MULTISPECIES: universal stress protein [Lysinibacillus]	16	27	1	1380.66	-0.00941314	-6.81788	1	22	0.0454545	145.344	0.0515466	1.05155	FALSE	TRUE	607	466	76.4223
F:\25-03-2022\20220324-TEST BROTH-POS-00.d	5858	scanId=3321963		55.3659	1180.58	623.891	2	2359.14	59	3134.49	K.AHSLTM(oxidation of M)ELAEFDHGDIPGLYK.F	AHSLTMELAEFDHGDIPGLYK	DECOY_WP_206700968.1 MULTISPECIES: 1-deoxy-D-xylulose-5-phosphate synthase [Lysinibacillus]	370	390	0	2359.12	0.0291683	12.3641	1	40	0.025	161.001	0.0513643	1.05136	FALSE	TRUE	607	467	76.5737
F:\25-03-2022\20220324-TEST BROTH-POS-00.d	1295	scanId=713690		11.8947	690.831	465.769	2	1379.65	19	877.455	-.M(oxidation of M)KEEANKYSHK.F	MKEEANKYSHK	DECOY_WP_233732807.1 MULTISPECIES: TRIC cation channel family protein [Lysinibacillus]	1	11	2	1379.65	-0.00278454	-2.01829	1	20	0.05	44.7212	0.0509669	1.05097	FALSE	TRUE	607	468	76.5737
F:\25-03-2022\20220324-TEST BROTH-POS-00.d	3375	scanId=1944953		32.4158	646.825	712.6	2	1291.64	46	3314.58	M.FIKQQDRDDK.L	FIKQQDRDDK	DECOY_WP_031417041.1 MULTISPECIES: manganese catalase family protein [Lysinibacillus]	2	11	2	1291.65	-0.0157293	-12.1776	1	18	0.0555556	168.781	0.0509209	1.05092	FALSE	TRUE	607	469	76.5737
F:\25-03-2022\20220324-TEST BROTH-POS-00.d	2171	scanId=1232547		20.5423	421.201	923.879	2	840.388	43	3514.19	K.YTTAEEK.T	YTTAEEK	DECOY_WP_031418539.1 MULTISPECIES: penicillin-binding protein [Lysinibacillus]	370	376	0	840.387	0.00129971	1.54656	1	12	0.0833333	178.914	0.0509117	1.05091	FALSE	TRUE	607	470	76.5737
F:\25-03-2022\20220324-TEST BROTH-POS-00.d	2731	scanId=1566011		26.1	324.695	1001.63	2	647.375	34	2855.85	K.VQFVR.S	VQFVR	WP_012293661.1 MULTISPECIES: CCA tRNA nucleotidyltransferase [Lysinibacillus]	100	104	0	647.375	-0.000153359	-0.236893	1	8	0.125	145.052	0.0507911	1.05079	TRUE	FALSE	608	470	76.5737
F:\25-03-2022\20220324-TEST BROTH-POS-00.d	4959	scanId=2797900		46.6315	784.952	2365.88	2	1567.89	92	6496.81	R.IFFLEIEKRM(oxidation of M)VK.D	IFFLEIEKRMVK	WP_012291661.1 MULTISPECIES: S-4TM family putative pore-forming effector [Lysinibacillus]	74	85	2	1567.88	0.0106137	6.76945	1	22	0.0454545	329.235	0.0506764	1.05068	TRUE	FALSE	609	470	76.5737
F:\25-03-2022\20220324-TEST BROTH-POS-00.d	951	scanId=516614		8.6101	620.312	415.02	2	1238.61	22	1414.42	K.YTNFPHLGYK.V	YTNFPHLGYK	WP_012294178.1 MULTISPECIES: Ig-like domain-containing protein [Lysinibacillus]	56	65	0	1238.61	0.0010511	0.848615	1	18	0.0555556	71.5	0.0505506	1.05055	TRUE	FALSE	610	470	76.5737
F:\25-03-2022\20220324-TEST BROTH-POS-00.d	2403	scanId=1372828		22.8803	422.254	867.323	2	842.493	53	4128.35	K.AALEQALK.Q	AALEQALK	WP_068983091.1 MULTISPECIES: recombinase RecA [Lysinibacillus]	6	13	0	842.486	0.00709845	8.4256	1	14	0.0714286	208.269	0.0504485	1.05045	TRUE	FALSE	611	470	76.5737
F:\25-03-2022\20220324-TEST BROTH-POS-00.d	3025	scanId=1738075		28.9678	793.422	482.509	2	1584.83	34	2422.75	R.QIIAQIETASLDQR.L	QIIAQIETASLDQR	DECOY_WP_012293038.1 MULTISPECIES: TetR/AcrR family transcriptional regulator [Lysinibacillus]	40	53	0	1584.85	-0.0181371	-11.4441	1	26	0.0384615	122.027	0.0503671	1.05037	FALSE	TRUE	611	471	76.6112
F:\25-03-2022\20220324-TEST BROTH-POS-00.d	2617	scanId=1496924		24.9486	491.245	748.131	2	980.475	57	5011.12	K.NTEFNTQK.L	NTEFNTQK	WP_107921590.1 MULTISPECIES: flagellin [Lysinibacillus]	127	134	0	980.456	0.0191682	19.5502	1	14	0.0714286	252.113	0.0503106	1.05031	TRUE	FALSE	612	471	76.6112
F:\25-03-2022\20220324-TEST BROTH-POS-00.d	2342	scanId=1335484		22.2579	379.233	481.936	2	756.451	40	3188.39	K.VAAILDR.I	VAAILDR	DECOY_WP_012293787.1 MULTISPECIES: pyroglutamyl-peptidase I [Lysinibacillus]	15	21	0	756.449	0.0019015	2.51372	1	12	0.0833333	159.955	0.050168	1.05017	FALSE	TRUE	612	472	76.7739
F:\25-03-2022\20220324-TEST BROTH-POS-00.d	4966	scanId=2801833		46.6971	654.893	1365.24	2	1307.77	66	4337.24	K.ITVVLKTAQAHK.L	ITVVLKTAQAHK	DECOY_WP_012294099.1 MULTISPECIES: HAMP domain-containing histidine kinase [Lysinibacillus]	57	68	1	1307.79	-0.0214164	-16.376	1	22	0.0454545	217.161	0.050069	1.05007	FALSE	TRUE	612	473	76.9365
F:\25-03-2022\20220324-TEST BROTH-POS-00.d	1426	scanId=788024		13.1336	576.794	576.212	2	1151.57	31	2610.17	R.ENHPTQALDK.L	ENHPTQALDK	DECOY_WP_031418973.1 MULTISPECIES: ATP-dependent DNA helicase RecG [Lysinibacillus]	627	636	0	1151.56	0.0155812	13.5306	1	18	0.0555556	130.63	0.0500466	1.05005	FALSE	TRUE	612	474	77.022
F:\25-03-2022\20220324-TEST BROTH-POS-00.d	4587	scanId=2602451		43.374	641.325	2004.98	2	1280.64	50	4652.73	K.DLPEFEGRYR.E	DLPEFEGRYR	DECOY_WP_012293806.1 MULTISPECIES: sulfurtransferase [Lysinibacillus]	88	97	1	1280.61	0.0211115	16.4854	1	18	0.0555556	232.642	0.0500013	1.05	FALSE	TRUE	612	475	77.022
F:\25-03-2022\20220324-TEST BROTH-POS-00.d	5967	scanId=3385321		56.4219	948.484	800.315	2	1894.95	59	3744.88	R.AVMAMLFSPDLGVTGKMK.A	AVMAMLFSPDLGVTGKMK	DECOY_WP_225341018.1 MULTISPECIES: NtaA/DmoA family FMN-dependent monooxygenase [Lysinibacillus]	356	373	1	1894.97	-0.0177242	-9.35327	1	34	0.0294118	186.976	0.0499285	1.04993	FALSE	TRUE	612	476	77.022
F:\25-03-2022\20220324-TEST BROTH-POS-00.d	1516	scanId=842558		14.0425	279.193	709.231	2	556.372	39	2991.84	R.KKPGK.T	KKPGK	DECOY_WP_206701021.1 MULTISPECIES: DUF188 domain-containing protein [Lysinibacillus]	35	39	1	556.37	0.00238708	4.29046	1	8	0.125	149.314	0.049907	1.04991	FALSE	TRUE	612	477	77.022
F:\25-03-2022\20220324-TEST BROTH-POS-00.d	2113	scanId=1198093		19.9681	481.758	620.695	2	961.502	34	2497.87	K.GKDSLTVSR.G	GKDSLTVSR	DECOY_WP_012295597.1 MULTISPECIES: LysR family transcriptional regulator [Lysinibacillus]	239	247	1	961.519	-0.017747	-18.4573	1	16	0.0625	124.562	0.0498676	1.04987	FALSE	TRUE	612	478	77.022
F:\25-03-2022\20220324-TEST BROTH-POS-00.d	2583	scanId=1477090		24.618	764.876	515.815	2	1527.74	35	2316.4	R.SSM(oxidation of M)LEVISQDYIK.T	SSMLEVISQDYIK	WP_036220980.1 MULTISPECIES: ABC transporter permease [Lysinibacillus]	202	214	0	1527.75	-0.0111511	-7.29904	1	24	0.0416667	114.612	0.0494786	1.04948	TRUE	FALSE	613	478	77.022
F:\25-03-2022\20220324-TEST BROTH-POS-00.d	2609	scanId=1491772		24.8627	572.313	642.112	2	1142.61	38	2842.66	K.GLGHGYEILGK.L	GLGHGYEILGK	WP_036161204.1 MULTISPECIES: histidine phosphatase family protein [Lysinibacillus]	160	170	0	1142.61	0.00313045	2.73974	1	20	0.05	140.008	0.0492524	1.04925	TRUE	FALSE	614	478	77.022
F:\25-03-2022\20220324-TEST BROTH-POS-00.d	2425	scanId=1386013		23.1001	492.285	768.327	2	982.556	37	3585.29	R.LPNIENRK.T	LPNIENRK	WP_012292841.1 MULTISPECIES: tyrosine-type recombinase/integrase [Lysinibacillus]	237	244	1	982.556	-3.44302e-05	-0.0350414	1	14	0.0714286	176.252	0.0491598	1.04916	TRUE	FALSE	615	478	77.022
F:\25-03-2022\20220324-TEST BROTH-POS-00.d	3513	scanId=2028337		33.8055	845.434	1074.11	2	1688.85	44	3095.95	K.KLDHQNIPDPVEER.C	KLDHQNIPDPVEER	WP_206700864.1 MULTISPECIES: serine O-acetyltransferase [Lysinibacillus]	174	187	1	1688.85	0.00506753	3.00059	1	26	0.0384615	152.147	0.049144	1.04914	TRUE	FALSE	616	478	77.022
F:\25-03-2022\20220324-TEST BROTH-POS-00.d	5256	scanId=2971605		49.5266	643.363	1146.06	2	1284.71	84	6568.07	R.TPGSIVAIRPM(oxidation of M)K.D	TPGSIVAIRPMK	WP_012295469.1 MULTISPECIES: rod shape-determining protein [Lysinibacillus]	58	69	0	1284.72	-0.0112345	-8.74471	1	22	0.0454545	321.545	0.0489558	1.04896	TRUE	FALSE	617	478	77.022
F:\25-03-2022\20220324-TEST BROTH-POS-00.d	1857	scanId=1045329		17.422	286.678	1208.25	2	571.342	42	4264.87	R.IAVNR.Q	IAVNR	DECOY_WP_112118787.1 MULTISPECIES: glutathione-dependent formaldehyde dehydrogenase [Lysinibacillus]	61	65	0	571.344	-0.00207725	-3.63572	1	8	0.125	208.519	0.0488922	1.04889	FALSE	TRUE	617	479	77.022
F:\25-03-2022\20220324-TEST BROTH-POS-00.d	3325	scanId=1915034		31.9171	736.91	838.268	2	1471.8	43	2837.33	R.GSDLSSGPIKDRIK.A	GSDLSSGPIKDRIK	WP_012296048.1 MULTISPECIES: energy-coupling factor transporter transmembrane protein EcfT [Lysinibacillus]	186	199	2	1471.8	0.00506207	3.43937	1	26	0.0384615	138.198	0.0487069	1.04871	TRUE	FALSE	618	479	77.022
F:\25-03-2022\20220324-TEST BROTH-POS-00.d	4666	scanId=2642649		44.044	522.811	1614.05	2	1043.61	62	4820.56	K.AIIIEIMNK.S	AIIIEIMNK	DECOY_WP_012296207.1 MULTISPECIES: replicative DNA helicase [Lysinibacillus]	38	46	0	1043.6	0.00285362	2.73438	1	16	0.0625	233.815	0.0485036	1.0485	FALSE	TRUE	618	480	77.022
F:\25-03-2022\20220324-TEST BROTH-POS-00.d	3567	scanId=2061081		34.3512	924.468	906.254	2	1846.92	64	3966.41	R.M(oxidation of M)FHATPPQLLSSFSIR.M	MFHATPPQLLSSFSIR	DECOY_WP_012292935.1 MULTISPECIES: XRE family transcriptional regulator [Lysinibacillus]	110	125	0	1846.94	-0.0184728	-10.0019	1	30	0.0333333	192.229	0.0484643	1.04846	FALSE	TRUE	618	481	77.022
F:\25-03-2022\20220324-TEST BROTH-POS-00.d	3686	scanId=2127221		35.4535	618.323	651.301	2	1234.63	38	2633.65	K.EQAKSSNKDTK.V	EQAKSSNKDTK	DECOY_WP_012295313.1 MULTISPECIES: hypothetical protein [Lysinibacillus]	234	244	2	1234.62	0.0168033	13.6101	1	20	0.05	127.146	0.0482774	1.04828	FALSE	TRUE	618	482	77.022
F:\25-03-2022\20220324-TEST BROTH-POS-00.d	1604	scanId=894712		14.9117	496.259	381.5	2	990.503	29	2371.82	K.LSELAAEMK.I	LSELAAEMK	WP_012296032.1 MULTISPECIES: phosphoglucosamine mutase [Lysinibacillus]	360	368	0	990.506	-0.00295007	-2.97834	1	16	0.0625	113.438	0.0478273	1.04783	TRUE	FALSE	619	482	77.022
F:\25-03-2022\20220324-TEST BROTH-POS-00.d	3001	scanId=1723121		28.7186	529.805	956.32	2	1057.59	43	3191.67	K.GQGRLFGPVK.D	GQGRLFGPVK	DECOY_WP_031419371.1 MULTISPECIES: ribonuclease PH [Lysinibacillus]	194	203	1	1057.6	-0.00860868	-8.1398	1	18	0.0555556	152.438	0.0477613	1.04776	FALSE	TRUE	619	483	77.022
F:\25-03-2022\20220324-TEST BROTH-POS-00.d	1540	scanId=857246		14.2873	337.695	613.715	2	673.374	41	2485.93	K.ETPSLK.G	ETPSLK	WP_024363077.1 MULTISPECIES: excalibur calcium-binding domain-containing protein [Lysinibacillus]	111	116	0	673.365	0.00984276	14.6173	1	10	0.1	117.934	0.0474407	1.04744	TRUE	FALSE	620	483	77.022
F:\25-03-2022\20220324-TEST BROTH-POS-00.d	3092	scanId=1777917		29.6318	519.772	1536.45	2	1037.53	50	4357.2	R.MAKVATMMR.E	MAKVATMMR	WP_036161355.1 MULTISPECIES: ABC transporter ATP-binding protein [Lysinibacillus]	240	248	1	1037.52	0.0105356	10.1546	1	16	0.0625	205.778	0.0472271	1.04723	TRUE	FALSE	621	483	77.022
F:\25-03-2022\20220324-TEST BROTH-POS-00.d	1781	scanId=1001718		16.6952	711.307	498.544	2	1420.6	24	1610.77	K.APLM(oxidation of M)NESEEETR.N	APLMNESEEETR	WP_012292923.1 MULTISPECIES: DUF4097 family beta strand repeat-containing protein [Lysinibacillus]	161	172	0	1420.61	-0.0155114	-10.9188	1	22	0.0454545	76.0613	0.0472204	1.04722	TRUE	FALSE	622	483	77.022
F:\25-03-2022\20220324-TEST BROTH-POS-00.d	4772	scanId=2698703		44.9783	707.925	1318.72	2	1413.84	66	3721.73	K.IIGGGLPVGAYGGKR.E	IIGGGLPVGAYGGKR	WP_053597181.1 MULTISPECIES: glutamate-1-semialdehyde 2,1-aminomutase [Lysinibacillus]	272	286	1	1413.81	0.0258948	18.3156	1	28	0.0357143	175.364	0.0471191	1.04712	TRUE	FALSE	623	483	77.022
F:\25-03-2022\20220324-TEST BROTH-POS-00.d	1564	scanId=871379		14.5229	323.695	482.786	2	645.375	26	2554.18	K.AIDSLK.I	AIDSLK	DECOY_WP_139015324.1 MULTISPECIES: XRE family transcriptional regulator [Lysinibacillus]	37	42	0	645.37	0.00501892	7.77681	1	10	0.1	120.143	0.0470378	1.04704	FALSE	TRUE	623	484	77.022
F:\25-03-2022\20220324-TEST BROTH-POS-00.d	956	scanId=519883		8.6646	612.775	465.452	2	1223.54	30	2305.03	R.SEYSFFEGMK.R	SEYSFFEGMK	WP_012296174.1 MULTISPECIES: MBL fold metallo-hydrolase [Lysinibacillus]	242	251	0	1223.52	0.0195331	15.9648	1	18	0.0555556	107.201	0.0465075	1.04651	TRUE	FALSE	624	484	77.022
F:\25-03-2022\20220324-TEST BROTH-POS-00.d	2803	scanId=1607175		26.7861	592.81	537.003	2	1183.6	40	3153.33	R.LFELSREYK.A	LFELSREYK	DECOY_WP_031417697.1 MULTISPECIES: lipoyl synthase [Lysinibacillus]	112	120	1	1183.62	-0.0189959	-16.0489	1	16	0.0625	146.551	0.0464751	1.04648	FALSE	TRUE	624	485	77.022
F:\25-03-2022\20220324-TEST BROTH-POS-00.d	2660	scanId=1523016		25.3835	802.876	629.134	2	1603.74	39	2856.78	R.GGLFYEQLFSNSSR.V	GGLFYEQLFSNSSR	DECOY_WP_036161783.1 MULTISPECIES: sodium/pantothenate symporter [Lysinibacillus]	442	455	0	1603.76	-0.0259642	-16.1896	1	26	0.0384615	132.314	0.0463157	1.04632	FALSE	TRUE	624	486	77.022
F:\25-03-2022\20220324-TEST BROTH-POS-00.d	2579	scanId=1474321		24.5719	497.26	402.25	2	992.505	35	2196.71	R.DAFDKELR.T	DAFDKELR	WP_227256843.1 MULTISPECIES: GDSL-type esterase/lipase family protein [Lysinibacillus]	183	190	1	992.493	0.012267	12.3598	1	14	0.0714286	101.325	0.0461257	1.04613	TRUE	FALSE	625	486	77.022
F:\25-03-2022\20220324-TEST BROTH-POS-00.d	3953	scanId=2277477		37.9578	359.714	5341.29	2	717.413	82	8734.44	-.MARGRK.F	MARGRK	WP_031418674.1 MULTISPECIES: TetR/AcrR family transcriptional regulator [Lysinibacillus]	1	6	2	717.407	0.00597062	8.3225	1	10	0.1	402.359	0.0460658	1.04607	TRUE	FALSE	626	486	77.022
F:\25-03-2022\20220324-TEST BROTH-POS-00.d	4158	scanId=2387239		39.7872	403.74	9139.63	2	805.465	122	18230.6	R.KKFNGGR.V	KKFNGGR	DECOY_WP_012293494.1 MULTISPECIES: YitT family protein [Lysinibacillus]	6	12	2	805.456	0.00880797	10.9354	1	12	0.0833333	839.804	0.0460657	1.04607	FALSE	TRUE	626	487	77.022
F:\25-03-2022\20220324-TEST BROTH-POS-00.d	3946	scanId=2273835		37.8971	1171.63	729.762	2	2341.25	36	1714.5	K.TYDAVAEYIHLLYAIMQVTK.G	TYDAVAEYIHLLYAIMQVTK	DECOY_WP_031418523.1 MULTISPECIES: DEAD/DEAH box helicase [Lysinibacillus]	427	446	0	2341.2	0.0456266	19.4885	1	38	0.0263158	78.9095	0.0460248	1.04602	FALSE	TRUE	626	488	77.022
F:\25-03-2022\20220324-TEST BROTH-POS-00.d	3754	scanId=2166273		36.1044	536.311	1046.7	2	1070.61	48	4149.46	K.KDALVEGALR.G	KDALVEGALR	WP_012292929.1 MULTISPECIES: S41 family peptidase [Lysinibacillus]	58	67	1	1070.61	-0.000152549	-0.142488	1	18	0.0555556	189.576	0.045687	1.04569	TRUE	FALSE	627	488	77.022
F:\25-03-2022\20220324-TEST BROTH-POS-00.d	6244	scanId=3541935		59.0321	978.937	965.676	2	1955.86	97	6650.22	K.VEHYESFSDFDELIAR.A	VEHYESFSDFDELIAR	WP_012295643.1 MULTISPECIES: tRNA 4-thiouridine(8) synthase ThiI [Lysinibacillus]	363	378	0	1955.89	-0.0298185	-15.2455	1	30	0.0333333	303.1	0.0455774	1.04558	TRUE	FALSE	628	488	77.022
F:\25-03-2022\20220324-TEST BROTH-POS-00.d	4449	scanId=2533636		42.2271	670.876	1249.55	2	1339.74	84	6570.68	R.VLNSYRFSLNK.S	VLNSYRFSLNK	WP_206700871.1 MULTISPECIES: magnesium/cobalt transporter CorA [Lysinibacillus]	181	191	1	1339.72	0.0128284	9.57541	1	20	0.05	299.15	0.0455279	1.04553	TRUE	FALSE	629	488	77.022
F:\25-03-2022\20220324-TEST BROTH-POS-00.d	2235	scanId=1271655		21.1941	490.746	711.736	2	979.478	47	3808.5	M.M(oxidation of M)STASALQR.Q	MSTASALQR	WP_012292036.1 MULTISPECIES: glycerol-3-phosphate dehydrogenase/oxidase [Lysinibacillus]	2	10	0	979.476	0.00226792	2.31545	1	16	0.0625	173.21	0.0454798	1.04548	TRUE	FALSE	630	488	77.022
F:\25-03-2022\20220324-TEST BROTH-POS-00.d	5189	scanId=2931214		48.8534	808.425	1142.64	2	1614.83	78	5024.98	-.M(oxidation of M)KWNFGKTALFEK.I	MKWNFGKTALFEK	DECOY_WP_012292602.1 MULTISPECIES: class II chromate reductase ChrR [Lysinibacillus]	1	13	2	1614.82	0.0120606	7.46865	1	24	0.0416667	227.615	0.0452966	1.0453	FALSE	TRUE	630	489	77.022
F:\25-03-2022\20220324-TEST BROTH-POS-00.d	3854	scanId=2223539		37.0588	457.238	2106.17	2	912.461	49	3932.2	K.ETRNTHR.T	ETRNTHR	WP_058844051.1 MULTISPECIES: histidine--tRNA ligase [Lysinibacillus]	171	177	1	912.453	0.00831309	9.11071	1	12	0.0833333	177.556	0.0451545	1.04515	TRUE	FALSE	631	489	77.022
F:\25-03-2022\20220324-TEST BROTH-POS-00.d	3764	scanId=2171923		36.1986	524.281	1317.93	2	1046.55	46	3071.77	K.IVEEYGLPK.D	IVEEYGLPK	WP_036161571.1 MULTISPECIES: class I SAM-dependent rRNA methyltransferase [Lysinibacillus]	367	375	0	1046.56	-0.0182035	-17.3935	1	16	0.0625	138.225	0.0449984	1.045	TRUE	FALSE	632	489	77.022
F:\25-03-2022\20220324-TEST BROTH-POS-00.d	2815	scanId=1614377		26.9062	416.25	879.379	2	830.485	43	3943.13	K.TIKGADVK.V	TIKGADVK	DECOY_WP_012293738.1 MULTISPECIES: multicopper oxidase [Lysinibacillus]	138	145	1	830.486	-0.00115528	-1.39109	1	14	0.0714286	177.414	0.0449932	1.04499	FALSE	TRUE	632	490	77.1795
F:\25-03-2022\20220324-TEST BROTH-POS-00.d	1684	scanId=943421		15.7235	430.734	1076.98	2	859.454	42	3357.98	K.MVAQNAVK.Y	MVAQNAVK	DECOY_WP_010860160.1 MULTISPECIES: 50S ribosomal protein L20 [Lysinibacillus]	81	88	0	859.459	-0.00502128	-5.84238	1	14	0.0714286	150.893	0.0449356	1.04494	FALSE	TRUE	632	491	77.337
F:\25-03-2022\20220324-TEST BROTH-POS-00.d	3068	scanId=1764232		29.4037	954.45	428.126	2	1906.88	31	1474.47	K.GGPFEWYNALVM(oxidation of M)HTNR.L	GGPFEWYNALVMHTNR	DECOY_WP_031416407.1 MULTISPECIES: (deoxy)nucleoside triphosphate pyrophosphohydrolase [Lysinibacillus]	94	109	0	1906.88	0.00649356	3.40534	1	30	0.0333333	66.2083	0.0449032	1.0449	FALSE	TRUE	632	492	77.3721
F:\25-03-2022\20220324-TEST BROTH-POS-00.d	2302	scanId=1311161		21.8526	666.833	536.025	2	1331.65	21	1342.86	R.AARIVDQM(oxidation of M)EQR.G	AARIVDQMEQR	WP_171821110.1 MULTISPECIES: DNA translocase FtsK [Lysinibacillus]	712	722	1	1331.66	-0.0105028	-7.88696	1	20	0.05	60.2321	0.0448537	1.04485	TRUE	FALSE	633	492	77.3721
F:\25-03-2022\20220324-TEST BROTH-POS-00.d	3820	scanId=2203436		36.7238	642.355	755.756	2	1282.69	40	2610.03	K.GIPINAQTENVK.N	GIPINAQTENVK	DECOY_WP_036162792.1 MULTISPECIES: non-ribosomal peptide synthetase [Lysinibacillus]	1746	1757	0	1282.69	0.00676846	5.27678	1	22	0.0454545	117.064	0.0448519	1.04485	FALSE	TRUE	633	493	77.5293
F:\25-03-2022\20220324-TEST BROTH-POS-00.d	3861	scanId=2228191		37.1364	521.815	1223.33	2	1041.62	55	3870.82	K.SAELILQLR.E	SAELILQLR	DECOY_WP_012292254.1 MULTISPECIES: D-alanine--poly(phosphoribitol) ligase subunit DltA [Lysinibacillus]	395	403	0	1041.62	-0.00266423	-2.55778	1	16	0.0625	173.517	0.0448271	1.04483	FALSE	TRUE	633	494	77.6866
F:\25-03-2022\20220324-TEST BROTH-POS-00.d	1451	scanId=802491		13.3747	359.208	852.699	2	716.402	65	6502.71	R.VGAAMLR.N	VGAAMLR	DECOY_WP_012295578.1 MULTISPECIES: phenylalanine--tRNA ligase subunit beta [Lysinibacillus]	556	562	0	716.4	0.00175028	2.44316	1	12	0.0833333	290.291	0.0446416	1.04464	FALSE	TRUE	633	495	77.7211
F:\25-03-2022\20220324-TEST BROTH-POS-00.d	2072	scanId=1173939		19.5655	584.778	581.88	2	1167.54	43	3751.14	-.MSEAYLGEIR.M	MSEAYLGEIR	WP_036220157.1 MULTISPECIES: tail fiber protein [Lysinibacillus]	1	10	0	1167.56	-0.0183059	-15.6788	1	18	0.0555556	167.422	0.0446321	1.04463	TRUE	FALSE	634	495	77.7211
F:\25-03-2022\20220324-TEST BROTH-POS-00.d	4301	scanId=2460481		41.0079	589.313	4049.32	2	1176.61	64	5779.1	K.LVM(oxidation of M)TEQWVR.H	LVMTEQWVR	DECOY_WP_025115837.1 MULTISPECIES: DUF402 domain-containing protein [Lysinibacillus]	153	161	0	1176.6	0.0156271	13.2816	1	16	0.0625	257.346	0.0445305	1.04453	FALSE	TRUE	634	496	77.7361
F:\25-03-2022\20220324-TEST BROTH-POS-00.d	660	scanId=356344		5.93893	634.334	506.144	2	1266.65	30	1820.78	-.MSKVEGLNSFR.V	MSKVEGLNSFR	DECOY_WP_012291914.1 MULTISPECIES: (2Fe-2S)-binding protein [Lysinibacillus]	1	11	1	1266.64	0.0144506	11.4086	1	20	0.05	81.0227	0.0444989	1.0445	FALSE	TRUE	634	497	77.7361
F:\25-03-2022\20220324-TEST BROTH-POS-00.d	2023	scanId=1143964		19.0659	672.825	437.036	2	1343.63	34	1914.5	R.DVEANILPSGSDK.R	DVEANILPSGSDK	WP_012293316.1 MULTISPECIES: aspartate-semialdehyde dehydrogenase [Lysinibacillus]	182	194	0	1343.66	-0.0219308	-16.3217	1	24	0.0416667	84.8138	0.0443007	1.0443	TRUE	FALSE	635	497	77.7361
F:\25-03-2022\20220324-TEST BROTH-POS-00.d	4120	scanId=2367542		39.4589	501.262	3519.01	2	1000.51	67	6942.03	R.NVISINGER.G	NVISINGER	DECOY_WP_031418633.1 MULTISPECIES: ATP-binding protein [Lysinibacillus]	315	323	0	1000.53	-0.0200005	-19.9899	1	16	0.0625	307.025	0.0442271	1.04423	FALSE	TRUE	635	498	77.7361
F:\25-03-2022\20220324-TEST BROTH-POS-00.d	5151	scanId=2908260		48.4709	933.53	968.819	2	1865.05	58	3261.92	R.TLEKLYTVIM(oxidation of M)EVRVR.S	TLEKLYTVIMEVRVR	DECOY_WP_012293748.1 MULTISPECIES: DEAD/DEAH box helicase [Lysinibacillus]	441	455	2	1865.04	0.000716956	0.384418	1	28	0.0357143	143.247	0.0439149	1.04391	FALSE	TRUE	635	499	77.7361
F:\25-03-2022\20220324-TEST BROTH-POS-00.d	1692	scanId=947802		15.7966	322.696	599.045	2	643.378	38	3162.69	K.TWLPK.M	TWLPK	WP_206701066.1 MULTISPECIES: transglutaminase-like domain-containing protein [Lysinibacillus]	620	624	0	643.369	0.00841182	13.0746	1	8	0.125	138.793	0.0438846	1.04388	TRUE	FALSE	636	499	77.7361
F:\25-03-2022\20220324-TEST BROTH-POS-00.d	2489	scanId=1423687		23.728	454.258	593.029	2	906.502	44	2838.95	K.VVWGVGYK.M	VVWGVGYK	WP_012292612.1 MULTISPECIES: response regulator transcription factor [Lysinibacillus]	220	227	0	906.496	0.00537285	5.92705	1	14	0.0714286	124.333	0.0437956	1.0438	TRUE	FALSE	637	499	77.7361
F:\25-03-2022\20220324-TEST BROTH-POS-00.d	4474	scanId=2546054		42.4341	879.893	1496.26	2	1757.77	65	4275.55	R.TEVVPANEYTDYSDR.F	TEVVPANEYTDYSDR	WP_012295264.1 MULTISPECIES: hypothetical protein [Lysinibacillus]	8	22	0	1757.77	-0.00354214	-2.01513	1	28	0.0357143	186.747	0.043678	1.04368	TRUE	FALSE	638	499	77.7361
F:\25-03-2022\20220324-TEST BROTH-POS-00.d	2770	scanId=1587673		26.4611	456.781	1296.69	2	911.547	60	4917.88	R.GVVKVPWK.K	GVVKVPWK	WP_206701041.1 MULTISPECIES: TrkH family potassium uptake protein [Lysinibacillus]	7	14	1	911.559	-0.0123105	-13.5049	1	14	0.0714286	214.303	0.0435762	1.04358	TRUE	FALSE	639	499	77.7361
F:\25-03-2022\20220324-TEST BROTH-POS-00.d	2655	scanId=1519914		25.3318	450.779	923.449	2	899.544	42	3882.59	K.KLEELIR.E	KLEELIR	DECOY_WP_012295983.1 MULTISPECIES: Lrp/AsnC family transcriptional regulator [Lysinibacillus]	128	134	1	899.544	-0.00038167	-0.424292	1	12	0.0833333	168.723	0.0434564	1.04346	FALSE	TRUE	639	500	77.8919
F:\25-03-2022\20220324-TEST BROTH-POS-00.d	2253	scanId=1282793		21.3798	321.713	1270.38	2	641.411	34	3461.68	R.IRILQ.-	IRILQ	DECOY_WP_036160542.1 MULTISPECIES: GNAT family N-acetyltransferase [Lysinibacillus]	553	557	1	641.422	-0.0115514	-18.0091	1	8	0.125	149.561	0.0432046	1.0432	FALSE	TRUE	639	501	78.0476
F:\25-03-2022\20220324-TEST BROTH-POS-00.d	5358	scanId=3029683		50.4946	820.951	943.742	2	1639.89	66	3753.82	K.LLDNPLIPFQQNTK.S	LLDNPLIPFQQNTK	DECOY_WP_036161437.1 MULTISPECIES: low specificity L-threonine aldolase [Lysinibacillus]	48	61	0	1639.89	-0.00590338	-3.59986	1	26	0.0384615	161.903	0.0431303	1.04313	FALSE	TRUE	639	502	78.1147
F:\25-03-2022\20220324-TEST BROTH-POS-00.d	4071	scanId=2341565		39.026	621.859	1457.67	2	1241.7	67	4579.05	K.ISQLGGNELIAK.S	ISQLGGNELIAK	DECOY_WP_012293225.1 MULTISPECIES: L-serine ammonia-lyase, iron-sulfur-dependent, subunit alpha [Lysinibacillus]	6	17	0	1241.7	0.00642816	5.17691	1	22	0.0454545	196.918	0.0430042	1.043	FALSE	TRUE	639	503	78.1147
F:\25-03-2022\20220324-TEST BROTH-POS-00.d	2546	scanId=1456703		24.2782	500.271	438.42	2	998.527	38	5102.1	R.KVGEYIYK.V	KVGEYIYK	WP_063389783.1 MULTISPECIES: YheC/YheD family protein [Lysinibacillus]	654	661	1	998.544	-0.0162615	-16.2852	1	14	0.0714286	219.133	0.0429496	1.04295	TRUE	FALSE	640	503	78.1147
F:\25-03-2022\20220324-TEST BROTH-POS-00.d	5290	scanId=2990553		49.8424	527.282	1421.12	2	1052.55	53	3925.16	K.TVELTSTFR.A	TVELTSTFR	WP_068983729.1 MULTISPECIES: histidine--tRNA ligase [Lysinibacillus]	345	353	0	1052.55	-0.00105883	-1.00596	1	16	0.0625	168.524	0.0429343	1.04293	TRUE	FALSE	641	503	78.1147
F:\25-03-2022\20220324-TEST BROTH-POS-00.d	1173	scanId=642300		10.7049	372.688	562.311	2	743.362	29	2103.72	K.YYDRK.D	YYDRK	DECOY_WP_012294130.1 MULTISPECIES: GNAT family N-acetyltransferase [Lysinibacillus]	268	272	1	743.36	0.00168315	2.26425	1	8	0.125	90.289	0.0429187	1.04292	FALSE	TRUE	641	504	78.27
F:\25-03-2022\20220324-TEST BROTH-POS-00.d	2213	scanId=1258136		20.9688	618.835	980.087	2	1235.65	57	3574.43	K.KFTKAEDQAAK.I	KFTKAEDQAAK	DECOY_WP_036160679.1 MULTISPECIES: ATP-binding protein [Lysinibacillus]	571	581	2	1235.65	0.00376322	3.04554	1	20	0.05	153.282	0.0428829	1.04288	FALSE	TRUE	641	505	78.291
F:\25-03-2022\20220324-TEST BROTH-POS-00.d	4197	scanId=2405970		40.0994	496.307	1680.74	2	990.599	64	5035.52	K.HPALANLKK.R	HPALANLKK	WP_012292409.1 MULTISPECIES: DUF5808 domain-containing protein [Lysinibacillus]	30	38	1	990.597	0.00168794	1.70396	1	16	0.0625	215.865	0.0428685	1.04287	TRUE	FALSE	642	505	78.291
F:\25-03-2022\20220324-TEST BROTH-POS-00.d	3357	scanId=1934202		32.2366	643.804	951.335	2	1285.59	55	3914.59	K.EGQAHQDM(oxidation of M)INK.T	EGQAHQDMINK	DECOY_WP_230591252.1 MULTISPECIES: YdcF family protein [Lysinibacillus]	79	89	0	1285.57	0.0214867	16.7137	1	20	0.05	167.781	0.0428606	1.04286	FALSE	TRUE	642	506	78.291
F:\25-03-2022\20220324-TEST BROTH-POS-00.d	1188	scanId=650947		10.849	412.715	657.765	2	823.416	40	3226.31	K.DLVQGHR.K	DLVQGHR	DECOY_WP_012295261.1 MULTISPECIES: TrkA family potassium uptake protein [Lysinibacillus]	109	115	0	823.43	-0.0142177	-17.2664	1	12	0.0833333	138.24	0.0428478	1.04285	FALSE	TRUE	642	507	78.291
F:\25-03-2022\20220324-TEST BROTH-POS-00.d	2009	scanId=1134992		18.9164	495.768	531.062	2	989.521	38	2963.79	R.SLMLQGVDK.L	SLMLQGVDK	WP_068986766.1 MULTISPECIES: chaperonin GroEL [Lysinibacillus]	13	21	0	989.522	-0.000392626	-0.396784	1	16	0.0625	126.625	0.0427241	1.04272	TRUE	FALSE	643	507	78.291
F:\25-03-2022\20220324-TEST BROTH-POS-00.d	4714	scanId=2667600		44.4599	502.817	1707.92	2	1003.62	56	3392.26	K.QLFKVIEK.M	QLFKVIEK	WP_068984209.1 MULTISPECIES: arginine--tRNA ligase [Lysinibacillus]	336	343	1	1003.61	0.0119241	11.8813	1	14	0.0714286	144.253	0.0425242	1.04252	TRUE	FALSE	644	507	78.291
F:\25-03-2022\20220324-TEST BROTH-POS-00.d	2900	scanId=1664013		27.7334	794.891	909.252	2	1587.77	29	1904.37	K.LNNYPGDEALVQQK.F	LNNYPGDEALVQQK	DECOY_WP_012296132.1 MULTISPECIES: transporter substrate-binding domain-containing protein [Lysinibacillus]	65	78	0	1587.79	-0.0226005	-14.234	1	26	0.0384615	80.9395	0.042502	1.0425	FALSE	TRUE	644	508	78.291
F:\25-03-2022\20220324-TEST BROTH-POS-00.d	2898	scanId=1662629		27.7103	528.297	752.918	2	1054.58	43	2695.42	K.NLTAKFAYK.R	NLTAKFAYK	WP_012292429.1 MULTISPECIES: GNAT family N-acetyltransferase [Lysinibacillus]	119	127	1	1054.58	-0.0015576	-1.47698	1	16	0.0625	114.399	0.0424421	1.04244	TRUE	FALSE	645	508	78.291
F:\25-03-2022\20220324-TEST BROTH-POS-00.d	1769	scanId=994682		16.5779	536.283	764.39	2	1070.55	38	3531.09	K.HMNLVSKDK.G	HMNLVSKDK	DECOY_WP_036225403.1 MULTISPECIES: nucleoside deaminase [Lysinibacillus]	25	33	1	1070.55	-0.00321395	-3.00214	1	16	0.0625	149.82	0.042429	1.04243	FALSE	TRUE	645	509	78.291
F:\25-03-2022\20220324-TEST BROTH-POS-00.d	1953	scanId=1101584		18.3596	460.234	519.332	2	918.453	29	2017.52	K.TLTDAGVDK.K	TLTDAGVDK	WP_036161631.1 MULTISPECIES: DUF1232 domain-containing protein [Lysinibacillus]	55	63	0	918.466	-0.0124386	-13.5427	1	16	0.0625	85.218	0.042239	1.04224	TRUE	FALSE	646	509	78.291
F:\25-03-2022\20220324-TEST BROTH-POS-00.d	4837	scanId=2731877		45.5311	760.459	1389.38	2	1518.9	65	4594.63	R.KKLVDLVDYISVK.Q	KKLVDLVDYISVK	DECOY_WP_012292228.1 MULTISPECIES: bifunctional phosphoribosyl-AMP cyclohydrolase/phosphoribosyl-ATP diphosphatase HisIE [Lysinibacillus]	7	19	2	1518.9	0.00081419	0.536038	1	24	0.0416667	193.945	0.0422112	1.04221	FALSE	TRUE	646	510	78.291
F:\25-03-2022\20220324-TEST BROTH-POS-00.d	2331	scanId=1328613		22.1434	506.796	968.614	2	1011.58	36	2502.36	K.VVNDPVEIK.E	VVNDPVEIK	WP_012294079.1 MULTISPECIES: aspartate kinase [Lysinibacillus]	230	238	0	1011.56	0.016993	16.7988	1	16	0.0625	105.504	0.042162	1.04216	TRUE	FALSE	647	510	78.291
F:\25-03-2022\20220324-TEST BROTH-POS-00.d	1988	scanId=1122856		18.7141	444.244	659.822	2	886.473	39	2970.37	K.GYILEHR.R	GYILEHR	DECOY_WP_012292526.1 MULTISPECIES: TetR/AcrR family transcriptional regulator [Lysinibacillus]	235	241	0	886.466	0.00708157	7.98854	1	12	0.0833333	125.007	0.0420847	1.04208	FALSE	TRUE	647	511	78.291
F:\25-03-2022\20220324-TEST BROTH-POS-00.d	3592	scanId=2075814		34.5968	443.263	1134.07	2	884.512	53	3598.39	K.AQQGVKVR.L	AQQGVKVR	WP_036223767.1 MULTISPECIES: cardiolipin synthase [Lysinibacillus]	172	179	1	884.519	-0.0070773	-8.0013	1	14	0.0714286	151.135	0.0420006	1.042	TRUE	FALSE	648	511	78.291
F:\25-03-2022\20220324-TEST BROTH-POS-00.d	2328	scanId=1326897		22.1148	395.242	760.057	2	788.47	42	3075.9	M.KNKMIR.K	KNKMIR	WP_227256872.1 MULTISPECIES: sensor domain-containing diguanylate cyclase [Lysinibacillus]	2	7	2	788.469	0.000861249	1.09231	1	10	0.1	129.001	0.0419393	1.04194	TRUE	FALSE	649	511	78.291
F:\25-03-2022\20220324-TEST BROTH-POS-00.d	1071	scanId=583325		9.72195	323.187	634.72	2	644.36	36	2986.31	K.VLGSNR.L	VLGSNR	DECOY_WP_008181126.1 MULTISPECIES: Rrf2 family transcriptional regulator [Lysinibacillus]	86	91	0	644.361	-0.000881859	-1.36858	1	10	0.1	125.175	0.0419163	1.04192	FALSE	TRUE	649	512	78.291
F:\25-03-2022\20220324-TEST BROTH-POS-00.d	3348	scanId=1928551		32.1424	548.753	374.646	2	1095.49	53	3339.02	M.RKENC[carbamidomethylation of C]DFK.T	RKENCDFK	WP_227256826.1 MULTISPECIES: serine/threonine protein phosphatase [Lysinibacillus]	2	9	2	1095.51	-0.0209477	-19.1214	1	14	0.0714286	139.12	0.0416649	1.04166	TRUE	FALSE	650	512	78.291
F:\25-03-2022\20220324-TEST BROTH-POS-00.d	2949	scanId=1692267		28.2043	616.336	921.665	2	1230.66	41	3474.57	K.M(oxidation of M)NVRAEVLQR.A	MNVRAEVLQR	WP_012293906.1 MULTISPECIES: mannonate oxidoreductase [Lysinibacillus]	493	502	1	1230.65	0.00634532	5.15607	1	18	0.0555556	144.593	0.0416146	1.04161	TRUE	FALSE	651	512	78.291
F:\25-03-2022\20220324-TEST BROTH-POS-00.d	2822	scanId=1618644		26.9773	428.245	796.036	2	854.474	45	3807.75	K.IDITTHR.D	IDITTHR	DECOY_WP_239069388.1 MULTISPECIES: GGDEF domain-containing protein [Lysinibacillus]	408	414	0	854.461	0.0134682	15.7623	1	12	0.0833333	158.43	0.0416072	1.04161	FALSE	TRUE	651	513	78.4439
F:\25-03-2022\20220324-TEST BROTH-POS-00.d	5345	scanId=3022419		50.3735	777.396	805.397	2	1552.78	52	3337.62	R.RAREEVTASM(oxidation of M)FIK.L	RAREEVTASMFIK	DECOY_WP_012293605.1 MULTISPECIES: (d)CMP kinase [Lysinibacillus]	71	83	2	1552.8	-0.0253104	-16.2998	1	24	0.0416667	138.857	0.0416037	1.0416	FALSE	TRUE	651	514	78.453
F:\25-03-2022\20220324-TEST BROTH-POS-00.d	1582	scanId=881913		14.6984	745.372	336.781	2	1488.73	19	1151.53	K.ADYLMAHPELMAK.T	ADYLMAHPELMAK	WP_227256875.1 MULTISPECIES: NtaA/DmoA family FMN-dependent monooxygenase [Lysinibacillus]	37	49	0	1488.71	0.0185169	12.4382	1	24	0.0416667	47.8438	0.0415482	1.04155	TRUE	FALSE	652	514	78.453
F:\25-03-2022\20220324-TEST BROTH-POS-00.d	1014	scanId=551938		9.19883	337.676	1386.93	2	673.338	46	3845.91	K.EEQLR.W	EEQLR	DECOY_WP_051563316.1 MULTISPECIES: glycosyltransferase family 4 protein [Lysinibacillus]	324	328	0	673.34	-0.00164346	-2.44075	1	8	0.125	159.211	0.0413975	1.0414	FALSE	TRUE	652	515	78.453
F:\25-03-2022\20220324-TEST BROTH-POS-00.d	2987	scanId=1714921		28.5819	571.325	703.383	2	1140.64	56	3884.19	K.KKEEIMVHK.L	KKEEIMVHK	DECOY_WP_012291997.1 MULTISPECIES: ABC transporter ATP-binding protein [Lysinibacillus]	60	68	2	1140.63	0.00260631	2.28497	1	16	0.0625	160.725	0.0413793	1.04138	FALSE	TRUE	652	516	78.453
F:\25-03-2022\20220324-TEST BROTH-POS-00.d	3364	scanId=1938855		32.3141	738.38	743.219	2	1474.75	40	2586.58	R.FDTREGRYYLR.V	FDTREGRYYLR	WP_012293131.1 MULTISPECIES: YugN family protein [Lysinibacillus]	44	54	2	1474.73	0.0146593	9.94034	1	20	0.05	107	0.0413673	1.04137	TRUE	FALSE	653	516	78.453
F:\25-03-2022\20220324-TEST BROTH-POS-00.d	4440	scanId=2529204		42.1533	968.957	1177	2	1935.9	61	3562.4	K.FVDM(oxidation of M)FARSVDKYETGR.I	FVDMFARSVDKYETGR	DECOY_WP_038509878.1 MULTISPECIES: DnaD domain protein [Lysinibacillus]	295	310	2	1935.91	-0.0153005	-7.90351	1	30	0.0333333	147.254	0.0413356	1.04134	FALSE	TRUE	653	517	78.453
F:\25-03-2022\20220324-TEST BROTH-POS-00.d	2948	scanId=1691934		28.1988	635.352	876.002	2	1268.69	68	4841.84	R.ENIPAIEKAER.L	ENIPAIEKAER	WP_012295175.1 MULTISPECIES: hypothetical protein [Lysinibacillus]	58	68	1	1268.67	0.0177339	13.9783	1	20	0.05	200.137	0.0413349	1.04133	TRUE	FALSE	654	517	78.453
F:\25-03-2022\20220324-TEST BROTH-POS-00.d	2100	scanId=1190726		19.8453	629.83	643.804	2	1257.65	41	2932.44	K.ERRSYYGISK.E	ERRSYYGISK	WP_036161697.1 MULTISPECIES: nitroreductase family protein [Lysinibacillus]	11	20	2	1257.65	-0.00146032	-1.16116	1	18	0.0555556	121.167	0.0413194	1.04132	TRUE	FALSE	655	517	78.453
F:\25-03-2022\20220324-TEST BROTH-POS-00.d	1600	scanId=892497		14.8748	402.707	696	2	803.4	39	3077.38	R.VNDIDTK.Y	VNDIDTK	WP_012295715.1 MULTISPECIES: asparagine synthase (glutamine-hydrolyzing) [Lysinibacillus]	516	522	0	803.402	-0.00223549	-2.78253	1	12	0.0833333	126.88	0.0412299	1.04123	TRUE	FALSE	656	517	78.453
F:\25-03-2022\20220324-TEST BROTH-POS-00.d	1701	scanId=952901		15.8816	430.235	563.086	2	858.455	36	2918.59	K.DLQIGADK.V	DLQIGADK	DECOY_WP_036162322.1 MULTISPECIES: dipeptidase PepV [Lysinibacillus]	329	336	0	858.445	0.0106759	12.4364	1	14	0.0714286	120.332	0.0412295	1.04123	FALSE	TRUE	656	518	78.6043
F:\25-03-2022\20220324-TEST BROTH-POS-00.d	2168	scanId=1230829		20.5137	702.85	419.13	2	1403.69	39	2682.49	K.LYNWGYSAFRK.Q	LYNWGYSAFRK	DECOY_WP_004232134.1 MULTISPECIES: transketolase [Lysinibacillus]	451	461	1	1403.7	-0.0129538	-9.22834	1	20	0.05	110.572	0.0412201	1.04122	FALSE	TRUE	656	519	78.6043
F:\25-03-2022\20220324-TEST BROTH-POS-00.d	4438	scanId=2528539		42.1422	575.844	3001.53	2	1149.67	85	6256.62	R.VLVKGIHQEK.V	VLVKGIHQEK	WP_012295255.1 MULTISPECIES: sporulation protein YqfD [Lysinibacillus]	265	274	1	1149.69	-0.0129023	-11.2224	1	18	0.0555556	257.581	0.0411693	1.04117	TRUE	FALSE	657	519	78.6043
F:\25-03-2022\20220324-TEST BROTH-POS-00.d	3691	scanId=2130321		35.5052	627.836	1233.46	2	1253.66	61	4240.87	K.GGSIIAGAHGMRK.G	GGSIIAGAHGMRK	DECOY_WP_012293252.1 MULTISPECIES: succinate--CoA ligase subunit alpha [Lysinibacillus]	47	59	1	1253.67	-0.00787633	-6.28264	1	24	0.0416667	174.503	0.041148	1.04115	FALSE	TRUE	657	520	78.6043
F:\25-03-2022\20220324-TEST BROTH-POS-00.d	4278	scanId=2448693		40.8114	542.809	7801.85	2	1083.6	102	13235.2	R.M(oxidation of M)LIDHLKAK.D	MLIDHLKAK	WP_012296155.1 MULTISPECIES: malate:quinone oxidoreductase [Lysinibacillus]	190	198	1	1083.61	-0.00820622	-7.57303	1	16	0.0625	543.091	0.041034	1.04103	TRUE	FALSE	658	520	78.6043
F:\25-03-2022\20220324-TEST BROTH-POS-00.d	3798	scanId=2191473		36.5244	472.269	1084.03	2	942.524	64	4606.75	R.AAVEKVNGR.I	AAVEKVNGR	DECOY_WP_012296030.1 MULTISPECIES: glutamine--fructose-6-phosphate transaminase (isomerizing) [Lysinibacillus]	68	76	1	942.525	-0.000541474	-0.574493	1	16	0.0625	189.015	0.04103	1.04103	FALSE	TRUE	658	521	78.6043
F:\25-03-2022\20220324-TEST BROTH-POS-00.d	2849	scanId=1634596		27.2431	708.336	1061.66	2	1414.66	51	3151.75	K.EIRSSTFDAFDK.I	EIRSSTFDAFDK	WP_012292176.1 MULTISPECIES: DNA repair exonuclease [Lysinibacillus]	31	42	1	1414.67	-0.0160848	-11.37	1	22	0.0454545	129.166	0.0409825	1.04098	TRUE	FALSE	659	521	78.6043
F:\25-03-2022\20220324-TEST BROTH-POS-00.d	3398	scanId=1957866		32.631	614.298	511.756	2	1226.58	48	2637.29	K.TFLQAAEEYR.K	TFLQAAEEYR	DECOY_WP_012295403.1 MULTISPECIES: tetratricopeptide repeat protein [Lysinibacillus]	197	206	0	1226.59	-0.0108793	-8.86952	1	18	0.0555556	108.001	0.0409516	1.04095	FALSE	TRUE	659	522	78.6043
F:\25-03-2022\20220324-TEST BROTH-POS-00.d	2460	scanId=1407839		23.4639	737.376	754.803	2	1472.74	26	1496.72	R.EELEGLKNADIRS.-	EELEGLKNADIRS	DECOY_WP_008181711.1 MULTISPECIES: 30S ribosomal protein S5 [Lysinibacillus]	155	167	2	1472.75	-0.0091776	-6.23162	1	24	0.0416667	61.1894	0.0408825	1.04088	FALSE	TRUE	659	523	78.6043
F:\25-03-2022\20220324-TEST BROTH-POS-00.d	2768	scanId=1586290		26.438	363.2	1582.25	2	724.385	30	3095.13	K.HGKIDR.K	HGKIDR	WP_012295540.1 MULTISPECIES: DUF421 domain-containing protein [Lysinibacillus]	102	107	1	724.398	-0.0127051	-17.5389	1	10	0.1	126.365	0.0408271	1.04083	TRUE	FALSE	660	523	78.6043
F:\25-03-2022\20220324-TEST BROTH-POS-00.d	1998	scanId=1128673		18.8111	436.741	1095.39	2	871.467	36	3322.26	K.GDNQGLLR.E	GDNQGLLR	DECOY_WP_051563253.1 MULTISPECIES: stalk domain-containing protein [Lysinibacillus]	157	164	0	871.451	0.0162224	18.6154	1	14	0.0714286	135.601	0.040816	1.04082	FALSE	TRUE	660	524	78.6043
F:\25-03-2022\20220324-TEST BROTH-POS-00.d	3927	scanId=2264304		37.7383	359.714	9443.36	2	717.413	102	14707.6	-.MARGRK.F	MARGRK	WP_031418674.1 MULTISPECIES: TetR/AcrR family transcriptional regulator [Lysinibacillus]	1	6	2	717.407	0.00590748	8.23449	1	10	0.1	600	0.0407953	1.0408	TRUE	FALSE	661	524	78.6043
F:\25-03-2022\20220324-TEST BROTH-POS-00.d	1836	scanId=1033633		17.2271	351.708	790.644	2	701.401	32	2407.54	R.QGELKK.R	QGELKK	DECOY_WP_051563180.1 MULTISPECIES: M23 family metallopeptidase [Lysinibacillus]	242	247	1	701.407	-0.00570213	-8.12955	1	10	0.1	98.0536	0.0407278	1.04073	FALSE	TRUE	661	525	78.6043
F:\25-03-2022\20220324-TEST BROTH-POS-00.d	3120	scanId=1793483		29.8912	501.271	847.33	2	1000.53	35	2405.33	K.IGGNDSLPTK.L	IGGNDSLPTK	DECOY_WP_012295141.1 MULTISPECIES: molecular chaperone [Lysinibacillus]	781	790	0	1000.52	0.00947212	9.46721	1	18	0.0555556	97.7232	0.0406278	1.04063	FALSE	TRUE	661	526	78.6043
F:\25-03-2022\20220324-TEST BROTH-POS-00.d	2755	scanId=1578975		26.3161	472.275	945.373	2	942.535	60	4418.1	R.AEALLRDR.E	AEALLRDR	DECOY_WP_227256911.1 MULTISPECIES: flagellar assembly protein FliH [Lysinibacillus]	206	213	1	942.525	0.0106545	11.3042	1	14	0.0714286	179.081	0.0405335	1.04053	FALSE	TRUE	661	527	78.6043
F:\25-03-2022\20220324-TEST BROTH-POS-00.d	3093	scanId=1778249		29.6374	606.838	932.683	2	1211.66	46	3264.94	K.NNNIIIENIR.I	NNNIIIENIR	WP_012292402.1 MULTISPECIES: MgtC/SapB family protein [Lysinibacillus]	182	191	0	1211.66	-0.00150593	-1.24287	1	18	0.0555556	131.934	0.0404094	1.04041	TRUE	FALSE	662	527	78.6043
F:\25-03-2022\20220324-TEST BROTH-POS-00.d	2005	scanId=1132776		18.8795	466.762	709.309	2	931.51	48	3322.82	R.KNDEVSLK.H	KNDEVSLK	WP_012291914.1 MULTISPECIES: (2Fe-2S)-binding protein [Lysinibacillus]	64	71	1	931.497	0.012912	13.8615	1	14	0.0714286	134.049	0.0403419	1.04034	TRUE	FALSE	663	527	78.6043
F:\25-03-2022\20220324-TEST BROTH-POS-00.d	3626	scanId=2094426		34.907	1180.59	734.914	2	2359.17	73	3695.14	R.WIPYNLAISNLYVM(oxidation of M)NYNQK.Q	WIPYNLAISNLYVMNYNQK	WP_036161073.1 MULTISPECIES: response regulator transcription factor [Lysinibacillus]	208	226	0	2359.17	0.00768903	3.25921	1	36	0.0277778	149.026	0.0403303	1.04033	TRUE	FALSE	664	527	78.6043
F:\25-03-2022\20220324-TEST BROTH-POS-00.d	5111	scanId=2884054		48.0674	642.373	804.633	2	1282.73	74	5369.98	K.VANALDNINLVK.V	VANALDNINLVK	DECOY_WP_206700870.1 MULTISPECIES: PIN/TRAM domain-containing protein [Lysinibacillus]	72	83	0	1282.72	0.00690022	5.37935	1	22	0.0454545	216.029	0.0402291	1.04023	FALSE	TRUE	664	528	78.6043
F:\25-03-2022\20220324-TEST BROTH-POS-00.d	2206	scanId=1253651		20.8941	818.387	339.314	2	1634.76	23	1718.29	K.ETSFHNVSLEM(oxidation of M)LGR.E	ETSFHNVSLEMLGR	DECOY_WP_036161104.1 MULTISPECIES: CamS family sex pheromone protein [Lysinibacillus]	291	304	0	1634.77	-0.0124959	-7.64384	1	26	0.0384615	68.75	0.0400108	1.04001	FALSE	TRUE	664	529	78.6043
F:\25-03-2022\20220324-TEST BROTH-POS-00.d	3718	scanId=2146995		35.7831	802.912	1071.98	2	1603.81	56	4856.26	K.ENHLVLVSHVC[carbamidomethylation of C]AAR.L	ENHLVLVSHVCAAR	DECOY_WP_036128256.1 MULTISPECIES: ribonuclease HIII [Lysinibacillus]	148	161	0	1603.83	-0.0164872	-10.2799	1	26	0.0384615	194.099	0.0399688	1.03997	FALSE	TRUE	664	530	78.6043
F:\25-03-2022\20220324-TEST BROTH-POS-00.d	2992	scanId=1717804		28.6299	460.258	683.6	2	918.501	50	3894.67	K.KVDLPYGK.H	KVDLPYGK	WP_139015370.1 MULTISPECIES: Ig-like domain-containing protein [Lysinibacillus]	146	153	1	918.517	-0.0164586	-17.9186	1	14	0.0714286	155.126	0.0398305	1.03983	TRUE	FALSE	665	530	78.6043
F:\25-03-2022\20220324-TEST BROTH-POS-00.d	3298	scanId=1899300		31.6549	720.384	657.386	2	1438.75	39	2807.92	K.ITNIPYPNHTNR.G	ITNIPYPNHTNR	DECOY_WP_036161900.1 MULTISPECIES: ETX/MTX2 family pore-forming toxin [Lysinibacillus]	96	107	0	1438.73	0.0212335	14.7585	1	22	0.0454545	111.63	0.0397556	1.03976	FALSE	TRUE	665	531	78.6043
F:\25-03-2022\20220324-TEST BROTH-POS-00.d	2372	scanId=1353989		22.5663	502.28	614.717	2	1002.55	45	3704.95	R.RSAQSVLDK.L	RSAQSVLDK	WP_012292395.1 MULTISPECIES: sigma-54-dependent Fis family transcriptional regulator [Lysinibacillus]	199	207	1	1002.55	-0.000230732	-0.230146	1	16	0.0625	147.154	0.0397182	1.03972	TRUE	FALSE	666	531	78.6043
F:\25-03-2022\20220324-TEST BROTH-POS-00.d	4595	scanId=2605831		43.4304	622.351	2548.51	2	1242.69	50	3169.03	K.GAELIKDWLAK.I	GAELIKDWLAK	DECOY_WP_068983512.1 MULTISPECIES: glycine cleavage system aminomethyltransferase GcvT [Lysinibacillus]	150	160	1	1242.7	-0.00905142	-7.28369	1	20	0.05	125.857	0.0397147	1.03971	FALSE	TRUE	666	532	78.6043
F:\25-03-2022\20220324-TEST BROTH-POS-00.d	2031	scanId=1148949		19.149	430.237	1367.63	2	858.458	48	4055.73	K.GVNLSGGQK.Q	GVNLSGGQK	WP_232901024.1 MULTISPECIES: ABC transporter ATP-binding protein/permease [Lysinibacillus]	434	442	0	858.456	0.00253028	2.94748	1	16	0.0625	161.004	0.0396979	1.0397	TRUE	FALSE	667	532	78.6043
F:\25-03-2022\20220324-TEST BROTH-POS-00.d	1780	scanId=1001385		16.6896	514.783	730.348	2	1027.55	29	2240.76	K.ATPEKNVAAK.K	ATPEKNVAAK	WP_036121394.1 MULTISPECIES: translation initiation factor IF-2 [Lysinibacillus]	52	61	1	1027.57	-0.0143076	-13.9238	1	18	0.0555556	88.8519	0.0396526	1.03965	TRUE	FALSE	668	532	78.6043
F:\25-03-2022\20220324-TEST BROTH-POS-00.d	3613	scanId=2087061		34.7842	636.873	626.516	2	1271.73	49	3297.65	R.IAVNISPKQFR.K	IAVNISPKQFR	WP_012293037.1 MULTISPECIES: bifunctional diguanylate cyclase/phosphodiesterase [Lysinibacillus]	507	517	1	1271.74	-0.00351949	-2.76747	1	20	0.05	130.547	0.0395879	1.03959	TRUE	FALSE	669	532	78.6043
F:\25-03-2022\20220324-TEST BROTH-POS-00.d	2229	scanId=1267887		21.1313	394.728	789.711	2	787.441	42	2710.72	K.VEEVKGK.A	VEEVKGK	WP_012295840.1 MULTISPECIES: siderophore ABC transporter substrate-binding protein [Lysinibacillus]	201	207	1	787.444	-0.0025217	-3.20239	1	12	0.0833333	107.215	0.0395522	1.03955	TRUE	FALSE	670	532	78.6043
F:\25-03-2022\20220324-TEST BROTH-POS-00.d	1868	scanId=1051981		17.5329	429.732	651.302	2	857.449	27	1878.41	R.VGENQRR.F	VGENQRR	WP_083227131.1 MULTISPECIES: tRNA (adenosine(37)-N6)-threonylcarbamoyltransferase complex ATPase subunit type 1 TsaE [Lysinibacillus]	124	130	1	857.447	0.00208693	2.43389	1	12	0.0833333	74.1658	0.0394834	1.03948	TRUE	FALSE	671	532	78.6043
F:\25-03-2022\20220324-TEST BROTH-POS-00.d	2002	scanId=1131058		18.8508	947.935	508.05	2	1893.86	34	2539.82	K.NDVYNKDVFYITEM(oxidation of M)K.T	NDVYNKDVFYITEMK	WP_012295301.1 MULTISPECIES: tyrosine-type recombinase/integrase [Lysinibacillus]	50	64	1	1893.88	-0.026376	-13.927	1	28	0.0357143	100.094	0.0394099	1.03941	TRUE	FALSE	672	532	78.6043
F:\25-03-2022\20220324-TEST BROTH-POS-00.d	6406	scanId=3635464		60.5909	508.271	2411.3	2	1014.53	140	15732.4	K.LYLDHAQR.Q	LYLDHAQR	DECOY_WP_012295993.1 MULTISPECIES: ABC-F type ribosomal protection protein [Lysinibacillus]	282	289	0	1014.52	0.00365868	3.6063	1	14	0.0714286	617.273	0.0392357	1.03924	FALSE	TRUE	672	533	78.6043
F:\25-03-2022\20220324-TEST BROTH-POS-00.d	2771	scanId=1588006		26.4666	414.751	1039.11	2	827.487	57	4691.71	K.ALALAVDR.Q	ALALAVDR	WP_012293201.1 MULTISPECIES: peptide ABC transporter substrate-binding protein [Lysinibacillus]	328	335	0	827.487	0.000333773	0.403358	1	14	0.0714286	184.028	0.039224	1.03922	TRUE	FALSE	673	533	78.6043
F:\25-03-2022\20220324-TEST BROTH-POS-00.d	4960	scanId=2798233		46.6371	587.831	1214.54	2	1173.65	74	5834.96	-.MIELTRLNGK.A	MIELTRLNGK	WP_012293269.1 MULTISPECIES: flagellar FlbD family protein [Lysinibacillus]	1	10	1	1173.65	-0.00709213	-6.04278	1	18	0.0555556	228.847	0.0392199	1.03922	TRUE	FALSE	674	533	78.6043
F:\25-03-2022\20220324-TEST BROTH-POS-00.d	3650	scanId=2107942		35.1322	402.219	1069.62	2	802.424	52	4431.68	K.IAGSAQTR.Q	IAGSAQTR	WP_031417388.1 MULTISPECIES: lipoate--protein ligase family protein [Lysinibacillus]	164	171	0	802.43	-0.00613695	-7.64796	1	14	0.0714286	173.719	0.0391994	1.0392	TRUE	FALSE	675	533	78.6043
F:\25-03-2022\20220324-TEST BROTH-POS-00.d	3441	scanId=1984072		33.0677	592.388	883.176	2	1182.76	39	2755.27	R.ARGRGLTIIVK.K	ARGRGLTIIVK	DECOY_WP_012295158.1 MULTISPECIES: hypothetical protein [Lysinibacillus]	5	15	2	1182.76	0.00593028	5.01395	1	20	0.05	107.69	0.039085	1.03908	FALSE	TRUE	675	534	78.697
F:\25-03-2022\20220324-TEST BROTH-POS-00.d	2708	scanId=1551387		25.8563	658.366	953.444	2	1314.72	57	3811.22	K.QMQRIGLRTGR.E	QMQRIGLRTGR	DECOY_WP_012292841.1 MULTISPECIES: tyrosine-type recombinase/integrase [Lysinibacillus]	73	83	2	1314.73	-0.0131029	-9.96621	1	20	0.05	148.93	0.0390768	1.03908	FALSE	TRUE	675	535	78.697
F:\25-03-2022\20220324-TEST BROTH-POS-00.d	4599	scanId=2607713		43.4618	674.889	2749.95	2	1347.76	83	6998.08	K.VLQC[carbamidomethylation of C]FAKELLK.N	VLQCFAKELLK	WP_012295140.1 MULTISPECIES: hypothetical protein [Lysinibacillus]	170	180	1	1347.76	0.00521977	3.87293	1	20	0.05	272.299	0.0389106	1.03891	TRUE	FALSE	676	535	78.697
F:\25-03-2022\20220324-TEST BROTH-POS-00.d	3400	scanId=1959250		32.654	688.836	750.177	2	1375.66	33	1522.65	K.NEWLMGNVTNAK.Y	NEWLMGNVTNAK	DECOY_WP_051563193.1 MULTISPECIES: serine hydrolase [Lysinibacillus]	159	170	0	1375.66	0.00188985	1.37378	1	22	0.0454545	59.0914	0.0388083	1.03881	FALSE	TRUE	676	536	78.697
F:\25-03-2022\20220324-TEST BROTH-POS-00.d	2129	scanId=1207676		20.1278	531.77	831.502	2	1061.53	49	3511.08	K.GDTLWDLSR.A	GDTLWDLSR	WP_012296179.1 MULTISPECIES: LysM peptidoglycan-binding and 3D domain-containing protein [Lysinibacillus]	32	40	0	1061.51	0.0119142	11.2238	1	16	0.0625	136.178	0.038785	1.03879	TRUE	FALSE	677	536	78.697
F:\25-03-2022\20220324-TEST BROTH-POS-00.d	2326	scanId=1325512		22.0917	507.296	782.081	2	1012.58	33	2058.31	R.LTISDPVIR.K	LTISDPVIR	WP_031418938.1 MULTISPECIES: orotate phosphoribosyltransferase [Lysinibacillus]	41	49	0	1012.59	-0.0146599	-14.4776	1	16	0.0625	79.717	0.0387293	1.03873	TRUE	FALSE	678	536	78.697
F:\25-03-2022\20220324-TEST BROTH-POS-00.d	2078	scanId=1177154		19.6191	508.771	604.226	2	1015.53	41	2817.35	-.M(oxidation of M)YRKQFK.N	MYRKQFK	DECOY_WP_012295178.1 MULTISPECIES: phosphate ABC transporter permease PstA [Lysinibacillus]	1	7	2	1015.53	0.000507979	0.500212	1	12	0.0833333	109.056	0.0387088	1.03871	FALSE	TRUE	678	537	78.8438
F:\25-03-2022\20220324-TEST BROTH-POS-00.d	3153	scanId=1813756		30.2291	635.361	864.935	2	1268.71	50	3890.36	R.GTGVAVVKGEQPK.E	GTGVAVVKGEQPK	DECOY_WP_024363933.1 MULTISPECIES: co-chaperone GroES [Lysinibacillus]	51	63	1	1268.71	-0.00198035	-1.56092	1	24	0.0416667	149.497	0.0384276	1.03843	FALSE	TRUE	678	538	78.9047
F:\25-03-2022\20220324-TEST BROTH-POS-00.d	2920	scanId=1675647		27.9273	484.749	1136.47	2	967.484	64	5040.31	R.ALM(oxidation of M)AAHPNK.A	ALMAAHPNK	DECOY_WP_012293345.1 MULTISPECIES: extracellular solute-binding protein [Lysinibacillus]	75	83	0	967.491	-0.00650895	-6.72766	1	16	0.0625	193.35	0.0383607	1.03836	FALSE	TRUE	678	539	78.9047
F:\25-03-2022\20220324-TEST BROTH-POS-00.d	3481	scanId=2008782		33.4796	543.317	834.286	2	1084.62	43	3086.32	K.AKAEIVEGIR.A	AKAEIVEGIR	WP_031419640.1 MULTISPECIES: UDP-N-acetylmuramoyl-tripeptide--D-alanyl-D-alanine ligase [Lysinibacillus]	207	216	1	1084.62	-0.00430164	-3.96602	1	18	0.0555556	118.041	0.0382464	1.03825	TRUE	FALSE	679	539	78.9047
[truncated: 1,185 more rows]

## Sheet: Unique Peptide
Filename	Spectrum Number	Spectrum ID	Spectrum Title	Retention Time (minutes)	Precursor m/z	Precursor Intensity	Precursor Charge	Precursor Mass (Da)	Experimental Peaks	Total Intensity	Peptide Sequence	Base Peptide Sequence	Protein Description	Start Residue Number	Stop Residue Number	Missed Cleavages	Theoretical Mass (Da)	Precursor Mass Error (Da)	Precursor Mass Error (ppm)	Matching Products	Total Products	Ratio of Matching Products	Matching Intensity	Fraction of Intensity Matching	Morpheus Score	Target?	Decoy?	Cumulative Target	Cumulative Decoy	Q-Value (%)
[truncated: 2,195 more rows]
